# Supplementary material for: Alu and B1 Repeats Have Been Selectively Retained in the Upstream and Intronic Regions of Genes of Specific Functional Classes
Source: PLoS Comput Biol. 2009 Dec 18;5(12):e1000610. doi: 10.1371/journal.pcbi.1000610 (PMC2784220; doi:10.1371/journal.pcbi.1000610)
Supplement: Table S2 — GO term p-values and q-values for all human Alu families in upstream regions. (1.14 MB XLS) [file pcbi.1000610.s002.xls]

## Sheet: human Alu upstream
		Alu+		Alu-		AluJ+		AluJ-		AluS+		AluS-		AluY+		AluY-
GO term id	genes	p-value	q-value	p-value	q-value	p-value	q-value	p-value	q-value	p-value	q-value	p-value	q-value	p-value	q-value	p-value	q-value	GO term description	GO term catecory
GO:0000003	515	0.339	1	0.44	1	0.773	1	0.413	1	0.465	1	0.348	1	0.00619	0.357	0.67	1	reproduction	P
GO:0000018	10	0.00945	0.667	0.00895	0.503	0.0339	1	0.0145	0.818	0.0141	1	0.0348	1	0.354	1	0.0646	1	regulation of DNA recombination	P
GO:0000030	14	0.0995	1	0.186	1	0.419	1	0.58	1	0.0299	1	0.195	1	0.776	1	0.0739	1	mannosyltransferase activity	F
GO:0000041	75	0.105	1	0.0398	1	0.689	1	0.0845	1	0.076	1	0.0179	0.881	0.269	1	0.766	1	transition metal ion transport	P
GO:0000045	11	0.0961	1	0.00621	0.36	0.164	1	0.118	1	0.0423	1	0.00498	0.27	0.709	1	0.224	1	autophagic vacuole formation	P
GO:0000049	21	0.182	1	0.0241	1	0.0981	1	0.487	1	0.362	1	0.0123	0.739	0.504	1	0.316	1	tRNA binding	F
GO:0000051	20	0.0775	1	0.074	1	0.125	1	0.13	1	0.104	1	0.0524	1	0.178	1	0.51	1	urea cycle intermediate metabolism	P
GO:0000059	17	0.000223	0.0264	9.78e-05	0.015	0.00418	0.327	0.059	1	0.000964	0.044	0.000183	0.026	0.0792	1	0.0771	1	protein import into nucleus, docking	P
GO:0000060	23	0.0918	1	0.0953	1	0.164	1	0.307	1	0.116	1	0.0611	1	0.248	1	0.537	1	protein import into nucleus, translocation	P
GO:0000062	12	0.0218	1	0.0637	1	0.0554	1	0.241	1	0.0399	1	0.121	1	0.0738	1	0.123	1	acyl-CoA binding	F
GO:0000070	32	0.052	1	0.0152	1	0.467	1	0.00475	0.346	0.0781	1	0.173	1	0.0307	1	0.00344	0.185	mitotic sister chromatid segregation	P
GO:0000074	367	1.66e-05	0.008	1.09e-06	0.00839	0.00322	0.248	0.000549	0.047	2.44e-05	0.005	1.26e-05	0.00488	0.052	1	0.00012	0.02	regulation of progression through cell cycle	P
GO:0000075	68	0.00403	0.328	0.00312	0.197	0.0456	1	0.0156	0.818	0.00775	0.539	0.00538	0.27	0.353	1	0.111	1	cell cycle checkpoint	P
GO:0000077	33	0.00734	0.634	0.0109	0.677	0.0157	0.693	0.0205	1	0.037	1	0.0131	0.739	0.184	1	0.184	1	DNA damage checkpoint	P
GO:0000079	50	0.0271	1	0.0166	1	0.162	1	0.104	1	0.0132	1	0.0324	1	0.485	1	0.0802	1	regulation of cyclin-dependent protein kinase activity	P
GO:0000080	16	0.0791	1	0.0156	1	0.589	1	0.0671	1	0.0775	1	0.0252	1	0.0583	1	0.0307	1	G1 phase of mitotic cell cycle	P
GO:0000082	45	0.0811	1	0.0421	1	0.265	1	0.0052	0.346	0.0309	1	0.139	1	0.532	1	0.3	1	G1/S transition of mitotic cell cycle	P
GO:0000084	16	0.072	1	0.0758	1	0.122	1	0.424	1	0.0876	1	0.128	1	0.122	1	0.0298	1	S phase of mitotic cell cycle	P
GO:0000086	20	0.00865	0.634	0.00702	0.36	0.000573	0.036	0.0445	1	0.0667	1	0.0151	0.739	0.0701	1	0.0909	1	G2/M transition of mitotic cell cycle	P
GO:0000087	226	1.33e-09	0.000806	1.58e-12	0	0.00159	0.248	4.64e-11	0	4.47e-09	0.000964	2.14e-08	0.000837	0.00103	0.0707	3e-06	0.00188	M phase of mitotic cell cycle	P
GO:0000096	21	0.264	1	0.0698	1	0.21	1	0.141	1	0.22	1	0.0607	1	0.967	1	0.966	1	sulfur amino acid metabolism	P
GO:0000097	14	0.24	1	0.137	1	0.091	1	0.418	1	0.253	1	0.0863	1	0.957	1	0.885	1	sulfur amino acid biosynthesis	P
GO:0000118	27	0.389	1	0.0747	1	0.157	1	0.635	1	0.354	1	0.0293	1	0.983	1	0.21	1	histone deacetylase complex	C
GO:0000119	25	0.000552	0.0337	0.00172	0.091	0.0162	0.693	0.017	0.818	0.00323	0.285	0.00102	0.0549	0.00852	0.63	0.25	1	mediator complex	C
GO:0000122	191	0.0118	0.667	0.0418	1	0.23	1	0.116	1	0.00385	0.285	0.062	1	0.3	1	0.157	1	negative regulation of transcription from RNA polymerase II promoter	P
GO:0000123	12	0.00142	0.202	9.99e-08	0.00497	0.00453	0.327	0.00026	0.027	0.0204	1	6.96e-06	0.00488	0.0384	1	0.00725	0.481	histone acetyltransferase complex	C
GO:0000139	350	0.0587	1	0.00139	0.091	0.0908	1	0.0484	1	0.0907	1	0.000812	0.0549	0.0877	1	0.313	1	Golgi membrane	C
GO:0000146	15	0.275	1	0.172	1	0.288	1	0.226	1	0.217	1	0.161	1	0.769	1	0.281	1	microfilament motor activity	F
GO:0000149	29	0.077	1	0.362	1	0.044	1	0.265	1	0.177	1	0.576	1	0.27	1	0.317	1	SNARE binding	F
GO:0000151	95	0.0219	1	0.00323	0.197	0.00419	0.327	0.02	1	0.235	1	0.00293	0.239	0.0597	1	0.27	1	ubiquitin ligase complex	C
GO:0000152	16	0.151	1	0.0901	1	0.267	1	0.161	1	0.517	1	0.162	1	0.0055	0.357	0.0756	1	nuclear ubiquitin ligase complex	C
GO:0000155	13	0.263	1	0.531	1	0.231	1	0.559	1	0.178	1	0.709	1	0.939	1	0.0566	1	two-component sensor activity	F
GO:0000159	23	0.2	1	0.00614	0.36	0.334	1	0.0351	1	0.199	1	0.0106	0.739	0.459	1	0.19	1	protein phosphatase type 2A complex	C
GO:0000160	11	0.679	1	0.8	1	0.401	1	0.563	1	0.644	1	0.926	1	0.943	1	0.526	1	two-component signal transduction system (phosphorelay)	P
GO:0000165	188	0.00136	0.202	0.00301	0.197	0.034	1	0.00388	0.241	0.000689	0.04	0.0152	0.739	0.222	1	0.0124	0.647	MAPKKK cascade	P
GO:0000166	2329	1.73e-32	0	0	0	4.61e-17	0	1.42e-20	0	2.78e-28	0	3.43e-43	0	1.66e-11	0	1.02e-12	0	nucleotide binding	F
GO:0000175	10	0.0376	1	0.422	1	0.152	1	0.491	1	0.0417	1	0.748	1	0.108	1	0.145	1	3'-5'-exoribonuclease activity	F
GO:0000178	12	0.0299	1	0.665	1	0.088	1	0.613	1	0.0551	1	0.873	1	0.0855	1	0.301	1	exosome (RNase complex)	C
GO:0000184	21	6e-06	0.007	6.76e-05	0.01	0.000278	0.036	0.00356	0.202	0.000105	0.017	0.000425	0.041	0.0245	1	0.00589	0.36	mRNA catabolism, nonsense-mediated decay	P
GO:0000186	16	0.415	1	0.377	1	0.495	1	0.826	1	0.286	1	0.42	1	0.596	1	0.0962	1	activation of MAPKK activity	P
GO:0000187	69	0.026	1	0.0112	0.677	0.0299	1	0.0167	0.818	0.0493	1	0.0168	0.86	0.205	1	0.121	1	activation of MAPK activity	P
GO:0000188	20	0.179	1	0.477	1	0.208	1	0.705	1	0.186	1	0.388	1	0.588	1	0.301	1	inactivation of MAPK activity	P
GO:0000209	15	0.33	1	0.502	1	0.17	1	0.459	1	0.364	1	0.449	1	0.827	1	0.753	1	protein polyubiquitination	P
GO:0000226	100	0.000455	0.0337	0.0166	1	2.16e-05	0.006	0.14	1	0.0091	0.539	0.0304	1	0.0145	0.647	0.0583	1	microtubule cytoskeleton organization and biogenesis	P
GO:0000228	115	0.000494	0.0337	0.000109	0.015	0.0129	0.532	0.0109	0.818	0.000524	0.022	0.000144	0.017	0.11	1	0.0652	1	nuclear chromosome	C
GO:0000242	12	0.0333	1	0.197	1	0.0239	1	0.41	1	0.0944	1	0.293	1	0.0253	1	0.00897	0.481	pericentriolar material	C
GO:0000245	35	0.000361	0.0337	2.91e-05	0.00958	0.00172	0.248	0.000622	0.047	0.00351	0.285	0.000242	0.026	0.0295	1	0.127	1	spliceosome assembly	P
GO:0000267	853	0.0164	0.667	0.00147	0.091	0.201	1	0.0771	1	0.0119	0.539	0.000564	0.0549	0.09	1	0.234	1	cell fraction	C
GO:0000271	47	0.281	1	0.175	1	0.742	1	0.706	1	0.174	1	0.122	1	0.466	1	0.217	1	polysaccharide biosynthesis	P
GO:0000272	16	0.996	1	0.776	1	0.709	1	0.687	1	1	1	0.726	1	0.811	1	0.895	1	polysaccharide catabolism	P
GO:0000278	385	5.87e-13	0	4.76e-16	0	0.000111	0.012	4.13e-11	0	8.84e-13	0	5.17e-12	0	0.000639	0.065	2.81e-07	0.00188	mitotic cell cycle	P
GO:0000279	298	6.27e-11	0	1.01e-14	0	0.000558	0.036	1.11e-11	0	1.55e-10	0	2.45e-10	0	0.00161	0.168	8.3e-07	0.00188	M phase	P
GO:0000287	420	6.3e-05	0.011	1.1e-09	0	0.00641	0.46	3.65e-06	0.008	4.46e-05	0.00635	3.46e-08	0.000837	0.245	1	0.000184	0.02	magnesium ion binding	F
GO:0000299	12	0.0668	1	0.389	1	0.327	1	0.71	1	0.0669	1	0.22	1	0.0353	1	0.777	1	integral to membrane of membrane fraction	C
GO:0000302	35	0.0344	1	0.0478	1	0.344	1	0.057	1	0.0115	0.539	0.108	1	0.388	1	0.0685	1	response to reactive oxygen species	P
GO:0000313	48	0.013	0.667	0.119	1	0.00322	0.248	0.136	1	0.257	1	0.233	1	0.00261	0.195	0.271	1	organellar ribosome	C
GO:0000314	18	0.038	1	0.241	1	0.0118	0.532	0.421	1	0.164	1	0.256	1	0.123	1	0.515	1	organellar small ribosomal subunit	C
GO:0000315	17	0.474	1	0.157	1	0.542	1	0.0342	1	0.584	1	0.213	1	0.132	1	0.397	1	organellar large ribosomal subunit	C
GO:0000323	209	0.0011	0.096	0.00111	0.091	0.195	1	0.0373	1	0.000275	0.017	0.00442	0.27	0.149	1	0.00398	0.185	lytic vacuole	C
GO:0000375	156	1.25e-15	0	3.78e-19	0	6.88e-07	0.00242	9.68e-08	0.000971	1.13e-13	0	1.59e-16	0	9.54e-06	0.00544	2.34e-08	0.000771	RNA splicing, via transesterification reactions	P
GO:0000377	156	1.25e-15	0	3.78e-19	0	6.88e-07	0.00242	9.68e-08	0.000971	1.13e-13	0	1.59e-16	0	9.54e-06	0.00544	2.34e-08	0.000771	RNA splicing, via transesterification reactions with bulged adenosine as nucleophile	P
GO:0000387	27	4.22e-06	0.007	3.72e-05	0.00958	0.000212	0.024	0.0289	1	7.27e-05	0.017	3.78e-05	0.012	0.127	1	0.0176	1	spliceosomal snRNP biogenesis	P
GO:0000398	156	1.25e-15	0	3.78e-19	0	6.88e-07	0.00242	9.68e-08	0.000971	1.13e-13	0	1.59e-16	0	9.54e-06	0.00544	2.34e-08	0.000771	nuclear mRNA splicing, via spliceosome	P
GO:0000502	49	0.0046	0.328	0.0003	0.0419	0.374	1	0.0312	1	0.000697	0.04	0.00109	0.0549	0.197	1	0.00112	0.0916	proteasome complex (sensu Eukaryota)	C
GO:0000718	21	0.0208	1	0.0263	1	0.0205	1	0.0451	1	0.0711	1	0.0462	1	0.116	1	0.449	1	nucleotide-excision repair, DNA damage removal	P
GO:0000723	28	0.0275	1	0.108	1	0.017	0.693	0.787	1	0.0941	1	0.0527	1	0.211	1	0.35	1	telomere maintenance	P
GO:0000724	15	0.0919	1	0.0388	1	0.02	1	0.357	1	0.551	1	0.0218	1	0.26	1	0.124	1	double-strand break repair via homologous recombination	P
GO:0000725	15	0.0919	1	0.0388	1	0.02	1	0.357	1	0.551	1	0.0218	1	0.26	1	0.124	1	recombinational repair	P
GO:0000726	12	0.259	1	0.371	1	0.134	1	0.98	1	0.454	1	0.0207	1	0.199	1	0.996	1	non-recombinational repair	P
GO:0000775	88	0.000907	0.083	7.37e-05	0.01	0.00829	0.46	0.00589	0.346	0.0019	0.176	0.000106	0.017	0.301	1	0.0312	1	chromosome, pericentric region	C
GO:0000776	47	0.0128	0.667	0.00298	0.197	0.0211	1	0.0241	1	0.0297	1	0.00395	0.27	0.272	1	0.0739	1	kinetochore	C
GO:0000777	30	0.0235	1	0.0866	1	0.0253	1	0.0884	1	0.0444	1	0.116	1	0.463	1	0.189	1	condensed chromosome kinetochore	C
GO:0000779	35	0.0133	0.667	0.112	1	0.0287	1	0.228	1	0.0267	1	0.109	1	0.266	1	0.24	1	condensed chromosome, pericentric region	C
GO:0000781	25	0.0211	1	0.0678	1	0.0349	1	0.485	1	0.0642	1	0.0359	1	0.0547	1	0.496	1	chromosome, telomeric region	C
GO:0000784	10	0.102	1	0.225	1	0.154	1	0.712	1	0.144	1	0.104	1	0.127	1	0.667	1	nuclear chromosome, telomeric region	C
GO:0000785	311	1.16e-05	0.007	4.32e-05	0.00958	0.182	1	0.252	1	2.02e-06	0.0026	0.000131	0.017	0.00473	0.357	7.94e-06	0.00188	chromatin	C
GO:0000786	158	0.00687	0.517	0.0165	1	0.96	1	0.939	1	0.000565	0.04	0.0104	0.739	0.0252	1	0.00239	0.14	nucleosome	C
GO:0000790	34	0.0112	0.667	0.132	1	0.0881	1	0.239	1	0.0166	1	0.175	1	0.152	1	0.107	1	nuclear chromatin	C
GO:0000792	35	0.0387	1	0.0262	1	0.111	1	0.403	1	0.0454	1	0.0316	1	0.192	1	0.0159	0.849	heterochromatin	C
GO:0000793	84	0.000318	0.0337	0.000529	0.069	0.0114	0.532	0.00443	0.346	0.000462	0.022	0.0018	0.161	0.0771	1	0.0474	1	condensed chromosome	C
GO:0000794	39	0.0299	1	8.78e-05	0.015	0.12	1	0.0634	1	0.0226	1	7.52e-05	0.017	0.266	1	0.285	1	condensed nuclear chromosome	C
GO:0000795	17	0.297	1	0.000286	0.0419	0.23	1	0.153	1	0.221	1	0.00118	0.064	0.953	1	0.19	1	synaptonemal complex	C
GO:0000803	12	0.168	1	0.446	1	0.612	1	0.893	1	0.242	1	0.421	1	0.13	1	0.32	1	sex chromosome	C
GO:0000819	33	0.0338	1	0.00821	0.36	0.4	1	0.00273	0.147	0.0497	1	0.108	1	0.0392	1	0.00284	0.185	sister chromatid segregation	P
GO:0000902	602	0.275	1	0.0482	1	0.0341	1	0.0123	0.818	0.289	1	0.158	1	0.785	1	0.0607	1	cell morphogenesis	P
GO:0000904	202	0.972	1	0.864	1	0.748	1	0.943	1	0.966	1	0.866	1	0.939	1	0.262	1	cellular morphogenesis during differentiation	P
GO:0000910	32	0.0718	1	0.000766	0.069	0.0872	1	0.0157	0.818	0.0306	1	0.00156	0.161	0.937	1	0.026	1	cytokinesis	P
GO:0000922	25	0.019	1	0.0701	1	0.00288	0.248	0.198	1	0.0699	1	0.0538	1	0.157	1	0.394	1	spindle pole	C
GO:0000930	10	0.0476	1	0.804	1	0.0288	1	0.895	1	0.146	1	0.865	1	0.0781	1	0.219	1	gamma-tubulin complex	C
GO:0001501	317	1	1	1	1	1	1	0.983	1	0.999	1	1	1	1	1	0.994	1	skeletal development	P
GO:0001502	16	0.803	1	0.9	1	0.985	1	0.942	1	0.65	1	0.743	1	0.62	1	0.984	1	cartilage condensation	P
GO:0001503	145	0.483	1	0.639	1	0.569	1	0.387	1	0.314	1	0.69	1	0.948	1	0.646	1	ossification	P
GO:0001505	102	0.985	1	0.868	1	0.834	1	0.511	1	0.98	1	0.892	1	0.978	1	0.924	1	regulation of neurotransmitter levels	P
GO:0001508	50	0.251	1	0.27	1	0.0498	1	0.172	1	0.566	1	0.331	1	0.235	1	0.427	1	regulation of action potential	P
GO:0001518	14	0.997	1	1	1	0.99	1	0.99	1	0.982	1	1	1	0.99	1	0.999	1	voltage-gated sodium channel complex	C
GO:0001522	14	0.234	1	0.373	1	0.475	1	0.518	1	0.145	1	0.636	1	0.434	1	0.0505	1	pseudouridine synthesis	P
GO:0001523	13	0.962	1	0.854	1	0.447	1	0.489	1	1	1	0.927	1	0.133	1	0.581	1	retinoid metabolism	P
GO:0001525	158	0.867	1	0.49	1	0.855	1	0.527	1	0.875	1	0.636	1	0.442	1	0.0898	1	angiogenesis	P
GO:0001533	18	1	1	1	1	1	1	0.942	1	0.999	1	0.999	1	0.987	1	0.999	1	cornified envelope	C
GO:0001539	47	0.443	1	0.403	1	0.252	1	0.321	1	0.485	1	0.714	1	0.581	1	0.0784	1	ciliary or flagellar motility	P
GO:0001540	10	0.306	1	0.793	1	0.104	1	0.5	1	0.438	1	0.966	1	0.366	1	0.0661	1	beta-amyloid binding	F
GO:0001541	24	0.139	1	0.282	1	0.13	1	0.173	1	0.132	1	0.342	1	0.617	1	0.379	1	ovarian follicle development	P
GO:0001558	167	0.28	1	0.0402	1	0.0235	1	0.00984	0.713	0.458	1	0.14	1	0.665	1	0.0774	1	regulation of cell growth	P
GO:0001565	15	0.466	1	0.105	1	0.559	1	0.326	1	0.471	1	0.0708	1	0.543	1	0.336	1	phorbol ester receptor activity	F
GO:0001568	226	0.928	1	0.555	1	0.898	1	0.514	1	0.958	1	0.796	1	0.322	1	0.0395	1	blood vessel development	P
GO:0001569	17	0.936	1	0.999	1	0.75	1	0.996	1	0.975	1	0.986	1	0.851	1	1	1	patterning of blood vessels	P
GO:0001570	25	0.471	1	0.374	1	0.695	1	0.418	1	0.397	1	0.462	1	0.247	1	0.365	1	vasculogenesis	P
GO:0001584	1078	1	1	1	1	1	1	1	1	1	1	1	1	1	1	1	1	rhodopsin-like receptor activity	F
GO:0001595	67	0.996	1	0.917	1	0.95	1	0.895	1	0.979	1	0.849	1	0.999	1	0.977	1	angiotensin receptor activity	F
GO:0001603	19	0.384	1	0.199	1	0.137	1	0.43	1	0.405	1	0.107	1	0.946	1	0.724	1	vasopressin-like receptor activity	F
GO:0001608	129	0.999	1	1	1	0.992	1	1	1	0.998	1	0.997	1	0.924	1	0.997	1	nucleotide receptor activity, G-protein coupled	F
GO:0001614	136	0.997	1	0.998	1	0.985	1	0.991	1	0.994	1	0.988	1	0.949	1	0.996	1	purinergic nucleotide receptor activity	F
GO:0001619	21	0.226	1	0.273	1	0.479	1	0.4	1	0.185	1	0.25	1	0.402	1	0.403	1	lysosphingolipid and lysophosphatidic acid receptor activity	F
GO:0001633	35	0.972	1	0.964	1	0.994	1	0.983	1	0.985	1	0.971	1	0.479	1	0.364	1	secretin-like receptor activity	F
GO:0001637	58	1	1	1	1	0.997	1	0.949	1	0.999	1	1	1	1	1	1	1	G-protein chemoattractant receptor activity	F
GO:0001649	46	0.692	1	0.751	1	0.991	1	0.733	1	0.42	1	0.861	1	0.833	1	0.15	1	osteoblast differentiation	P
GO:0001653	415	1	1	1	1	1	1	1	1	1	1	1	1	1	1	1	1	peptide receptor activity	F
GO:0001654	80	0.567	1	0.925	1	0.281	1	0.743	1	0.541	1	0.968	1	0.874	1	0.309	1	eye development	P
GO:0001655	82	1	1	1	1	0.999	1	0.956	1	0.998	1	1	1	0.998	1	0.951	1	urogenital system development	P
GO:0001656	41	1	1	1	1	1	1	0.998	1	0.999	1	1	1	1	1	0.908	1	metanephros development	P
GO:0001657	33	1	1	1	1	1	1	0.998	1	0.997	1	1	1	1	1	0.878	1	ureteric bud development	P
GO:0001658	20	1	1	0.986	1	1	1	0.926	1	1	1	0.994	1	0.998	1	0.663	1	ureteric bud branching	P
GO:0001659	227	0.186	1	0.294	1	0.0218	1	0.173	1	0.457	1	0.354	1	0.223	1	0.659	1	thermoregulation	P
GO:0001662	10	0.694	1	0.636	1	0.27	1	0.662	1	0.955	1	0.542	1	0.58	1	0.503	1	behavioral fear response	P
GO:0001664	85	0.848	1	0.96	1	0.705	1	0.697	1	0.942	1	0.889	1	0.329	1	1	1	G-protein-coupled receptor binding	F
GO:0001666	75	0.0162	0.667	0.0226	1	0.00883	0.46	0.0338	1	0.0263	1	0.0537	1	0.247	1	0.13	1	response to hypoxia	P
GO:0001669	32	0.873	1	0.471	1	0.999	1	0.484	1	0.774	1	0.401	1	0.248	1	0.674	1	acrosome	C
GO:0001701	114	0.0011	0.096	0.0102	0.518	0.0587	1	0.0189	1	0.0021	0.285	0.0123	0.739	0.00587	0.357	0.276	1	embryonic development (sensu Mammalia)	P
GO:0001702	14	0.202	1	0.289	1	0.468	1	0.484	1	0.192	1	0.214	1	0.572	1	0.375	1	gastrulation (sensu Deuterostomia)	P
GO:0001704	37	0.385	1	0.322	1	0.425	1	0.841	1	0.357	1	0.474	1	0.465	1	0.043	1	formation of primary germ layer	P
GO:0001707	33	0.259	1	0.203	1	0.383	1	0.622	1	0.235	1	0.316	1	0.383	1	0.046	1	mesoderm formation	P
GO:0001708	28	0.99	1	1	1	1	1	1	1	0.96	1	0.997	1	0.995	1	0.898	1	cell fate specification	P
GO:0001709	35	0.972	1	0.992	1	0.966	1	1	1	0.973	1	0.973	1	0.767	1	0.801	1	cell fate determination	P
GO:0001725	18	0.0234	1	0.0167	1	0.0292	1	0.113	1	0.0112	0.539	0.0169	0.86	0.917	1	0.595	1	stress fiber	C
GO:0001726	46	0.0157	0.667	0.0043	0.197	0.11	1	0.0623	1	0.00756	0.539	0.0116	0.739	0.3	1	0.0166	0.849	ruffle	C
GO:0001727	26	0.0276	1	0.0233	1	0.0313	1	0.0818	1	0.106	1	0.0368	1	0.151	1	0.155	1	lipid kinase activity	F
GO:0001739	12	0.168	1	0.446	1	0.612	1	0.893	1	0.242	1	0.421	1	0.13	1	0.32	1	sex chromatin	C
GO:0001750	13	0.991	1	0.659	1	0.426	1	0.995	1	0.999	1	0.484	1	0.991	1	0.529	1	photoreceptor outer segment	C
GO:0001755	19	0.968	1	0.914	1	0.857	1	0.992	1	0.987	1	0.81	1	0.654	1	0.878	1	neural crest cell migration	P
GO:0001756	28	0.738	1	0.834	1	0.424	1	0.792	1	0.715	1	0.814	1	0.955	1	0.646	1	somitogenesis	P
GO:0001759	13	0.762	1	0.991	1	0.975	1	0.998	1	0.549	1	0.95	1	0.916	1	0.967	1	induction of an organ	P
GO:0001763	61	1	1	0.999	1	0.988	1	0.996	1	1	1	0.994	1	1	1	1	1	morphogenesis of a branching structure	P
GO:0001764	60	0.988	1	1	1	0.99	1	0.985	1	0.974	1	1	1	0.81	1	0.995	1	neuron migration	P
GO:0001772	24	0.0434	1	0.482	1	0.0125	0.532	0.568	1	0.121	1	0.626	1	0.117	1	0.373	1	immunological synapse	C
GO:0001775	284	0.0331	1	0.0111	0.677	0.0268	1	0.0165	0.818	0.0467	1	0.0303	1	0.373	1	0.0512	1	cell activation	P
GO:0001776	31	0.0248	1	0.0773	1	0.083	1	0.0574	1	0.0238	1	0.0658	1	0.103	1	0.291	1	leukocyte homeostasis	P
GO:0001782	10	0.0746	1	0.304	1	0.118	1	0.289	1	0.0475	1	0.403	1	0.944	1	0.173	1	B cell homeostasis	P
GO:0001816	130	0.29	1	0.164	1	0.224	1	0.0829	1	0.38	1	0.25	1	0.277	1	0.37	1	cytokine production	P
GO:0001817	18	0.605	1	0.79	1	0.563	1	0.206	1	0.642	1	0.88	1	0.316	1	0.964	1	regulation of cytokine production	P
GO:0001819	12	0.227	1	0.592	1	0.266	1	0.261	1	0.299	1	0.69	1	0.198	1	0.747	1	positive regulation of cytokine production	P
GO:0001822	72	1	1	1	1	0.999	1	0.975	1	0.994	1	1	1	0.997	1	0.927	1	kidney development	P
GO:0001824	33	0.000332	0.0337	0.00142	0.091	0.0198	1	0.00681	0.453	0.000411	0.022	0.00592	0.351	0.0299	1	0.0222	1	blastocyst development	P
GO:0001825	12	0.0043	0.328	0.00514	0.36	0.0616	1	0.0247	1	0.00217	0.285	0.0413	1	0.0842	1	0.018	1	blastocyst formation	P
GO:0001829	10	0.0137	0.667	0.0228	1	0.168	1	0.0232	1	0.0109	0.539	0.153	1	0.0443	1	0.00811	0.481	trophectodermal cell differentiation	P
GO:0001832	11	0.0761	1	0.172	1	0.186	1	0.274	1	0.0812	1	0.205	1	0.135	1	0.101	1	blastocyst growth	P
GO:0001836	16	0.00187	0.202	0.000855	0.069	0.0211	1	0.00145	0.115	0.00157	0.176	0.00744	0.53	0.0323	1	0.00902	0.481	release of cytochrome c from mitochondria	P
GO:0001837	13	0.74	1	0.432	1	0.785	1	0.479	1	0.767	1	0.469	1	0.726	1	0.255	1	epithelial to mesenchymal transition	P
GO:0001838	40	0.387	1	0.28	1	0.272	1	0.511	1	0.406	1	0.243	1	0.672	1	0.148	1	embryonic epithelial tube formation	P
GO:0001839	39	0.521	1	0.328	1	0.28	1	0.51	1	0.525	1	0.257	1	0.797	1	0.286	1	neural plate morphogenesis	P
GO:0001841	37	0.452	1	0.262	1	0.245	1	0.403	1	0.495	1	0.231	1	0.716	1	0.21	1	neural tube formation	P
GO:0001843	27	0.376	1	0.235	1	0.04	1	0.399	1	0.655	1	0.218	1	0.672	1	0.203	1	neural tube closure	P
GO:0001871	127	0.929	1	0.982	1	0.68	1	0.881	1	0.889	1	0.958	1	0.961	1	0.988	1	pattern binding	F
GO:0001889	26	0.216	1	0.0565	1	0.481	1	0.0822	1	0.247	1	0.0902	1	0.135	1	0.144	1	liver development	P
GO:0001890	34	0.0642	1	0.0371	1	0.188	1	0.0702	1	0.116	1	0.0604	1	0.0537	1	0.285	1	placenta development	P
GO:0001892	14	0.0306	1	0.011	0.677	0.0739	1	0.00531	0.346	0.0385	1	0.0965	1	0.0797	1	0.119	1	embryonic placenta development	P
GO:0001894	41	0.0363	1	0.0473	1	0.101	1	0.0737	1	0.0215	1	0.0283	1	0.297	1	0.222	1	tissue homeostasis	P
GO:0001906	23	0.933	1	0.45	1	0.84	1	0.361	1	0.891	1	0.378	1	0.573	1	0.853	1	cell killing	P
GO:0001909	20	0.799	1	0.374	1	0.727	1	0.282	1	0.751	1	0.344	1	0.488	1	0.803	1	leukocyte mediated cytotoxicity	P
GO:0001910	12	0.966	1	0.918	1	0.95	1	0.345	1	0.917	1	0.919	1	0.651	1	0.989	1	regulation of leukocyte mediated cytotoxicity	P
GO:0001932	89	0.854	1	0.908	1	0.389	1	0.387	1	0.823	1	0.944	1	0.982	1	0.945	1	regulation of protein amino acid phosphorylation	P
GO:0001933	13	0.0206	1	0.0281	1	0.00226	0.248	0.0528	1	0.0295	1	0.0695	1	0.351	1	0.237	1	negative regulation of protein amino acid phosphorylation	P
GO:0001934	43	0.88	1	0.87	1	0.347	1	0.346	1	0.886	1	0.956	1	0.966	1	0.715	1	positive regulation of protein amino acid phosphorylation	P
GO:0001935	29	0.424	1	0.266	1	0.787	1	0.18	1	0.321	1	0.449	1	0.398	1	0.226	1	endothelial cell proliferation	P
GO:0001936	24	0.552	1	0.422	1	0.814	1	0.293	1	0.478	1	0.64	1	0.519	1	0.238	1	regulation of endothelial cell proliferation	P
GO:0001937	15	0.475	1	0.57	1	0.432	1	0.242	1	0.608	1	0.751	1	0.345	1	0.672	1	negative regulation of endothelial cell proliferation	P
GO:0001938	10	0.776	1	0.283	1	0.99	1	0.314	1	0.461	1	0.5	1	0.821	1	0.037	1	positive regulation of endothelial cell proliferation	P
GO:0001942	34	0.986	1	0.972	1	0.989	1	0.97	1	0.962	1	0.969	1	0.979	1	0.361	1	hair follicle development	P
GO:0001944	230	0.956	1	0.602	1	0.933	1	0.546	1	0.976	1	0.834	1	0.333	1	0.0414	1	vasculature development	P
GO:0001947	15	0.302	1	0.259	1	0.483	1	0.224	1	0.371	1	0.344	1	0.123	1	0.281	1	heart looping	P
GO:0001948	14	0.32	1	0.0647	1	0.105	1	0.552	1	0.521	1	0.0474	1	0.315	1	0.0324	1	glycoprotein binding	F
GO:0001952	18	0.798	1	0.619	1	0.64	1	0.389	1	0.702	1	0.767	1	0.958	1	0.403	1	regulation of cell-matrix adhesion	P
GO:0001974	14	1	1	0.999	1	1	1	0.999	1	1	1	0.996	1	0.782	1	0.839	1	blood vessel remodeling	P
GO:0001976	20	0.894	1	1	1	0.98	1	0.969	1	0.882	1	1	1	0.139	1	0.658	1	fast regulation of arterial pressure	P
GO:0001990	17	0.947	1	1	1	0.973	1	0.92	1	0.917	1	1	1	0.24	1	0.621	1	regulation of blood pressure by hormones	P
GO:0002009	121	0.991	1	0.869	1	0.93	1	0.871	1	0.974	1	0.87	1	0.956	1	0.552	1	morphogenesis of an epithelium	P
GO:0002026	10	0.734	1	0.582	1	0.587	1	0.991	1	0.64	1	0.294	1	0.75	1	0.95	1	cardiac inotropy	P
GO:0002053	10	0.636	1	0.923	1	0.937	1	0.889	1	0.381	1	0.946	1	0.868	1	0.379	1	positive regulation of mesenchymal cell proliferation	P
GO:0002062	19	1	1	0.996	1	0.999	1	0.999	1	1	1	0.955	1	0.999	1	0.946	1	chondrocyte differentiation	P
GO:0002064	12	0.655	1	0.98	1	0.434	1	0.912	1	0.693	1	0.994	1	0.611	1	0.962	1	epithelial cell development	P
GO:0002088	12	0.566	1	0.666	1	0.246	1	0.507	1	0.828	1	0.638	1	0.354	1	0.817	1	lens development (sensu Vertebrata)	P
GO:0002200	29	0.306	1	0.095	1	0.529	1	0.263	1	0.172	1	0.0711	1	0.936	1	0.55	1	somatic diversification of immune receptors	P
GO:0002204	24	0.37	1	0.0852	1	0.533	1	0.244	1	0.226	1	0.0659	1	0.992	1	0.555	1	somatic recombination of immunoglobulin genes during immune response	P
GO:0002208	24	0.37	1	0.0852	1	0.533	1	0.244	1	0.226	1	0.0659	1	0.992	1	0.555	1	somatic diversification of immunoglobulins during immune response	P
GO:0002209	10	0.694	1	0.636	1	0.27	1	0.662	1	0.955	1	0.542	1	0.58	1	0.503	1	behavioral defense response	P
GO:0002217	572	1	1	0.955	1	0.999	1	0.889	1	1	1	0.912	1	0.985	1	0.924	1	physiological defense response	P
GO:0002228	16	0.79	1	0.429	1	0.682	1	0.647	1	0.804	1	0.342	1	0.319	1	0.664	1	natural killer cell mediated immunity	P
GO:0002245	547	0.99	1	0.506	1	0.823	1	0.375	1	0.993	1	0.495	1	0.903	1	0.602	1	physiological response to wounding	P
GO:0002250	151	0.55	1	0.27	1	0.49	1	0.429	1	0.549	1	0.193	1	0.556	1	0.743	1	adaptive immune response	P
GO:0002252	183	0.366	1	0.322	1	0.448	1	0.513	1	0.291	1	0.246	1	0.634	1	0.635	1	immune effector process	P
GO:0002253	76	0.296	1	0.444	1	0.57	1	0.573	1	0.185	1	0.458	1	0.69	1	0.253	1	activation of immune response	P
GO:0002260	23	0.0363	1	0.0832	1	0.0737	1	0.0819	1	0.0271	1	0.0672	1	0.418	1	0.22	1	lymphocyte homeostasis	P
GO:0002263	17	0.207	1	0.101	1	0.0741	1	0.294	1	0.308	1	0.071	1	0.504	1	0.281	1	cell activation during immune response	P
GO:0002274	36	0.463	1	0.187	1	0.277	1	0.0805	1	0.423	1	0.293	1	0.92	1	0.236	1	myeloid leukocyte activation	P
GO:0002285	15	0.469	1	0.304	1	0.182	1	0.5	1	0.617	1	0.222	1	0.689	1	0.812	1	lymphocyte activation during immune response	P
GO:0002286	13	0.538	1	0.298	1	0.253	1	0.503	1	0.623	1	0.203	1	0.854	1	0.819	1	T cell activation during immune response	P
GO:0002292	13	0.538	1	0.298	1	0.253	1	0.503	1	0.623	1	0.203	1	0.854	1	0.819	1	T cell differentiation during immune response	P
GO:0002293	13	0.538	1	0.298	1	0.253	1	0.503	1	0.623	1	0.203	1	0.854	1	0.819	1	alpha-beta T cell differentiation during immune response	P
GO:0002294	13	0.538	1	0.298	1	0.253	1	0.503	1	0.623	1	0.203	1	0.854	1	0.819	1	CD4-positive, alpha-beta T cell differentiation during immune response	P
GO:0002366	17	0.207	1	0.101	1	0.0741	1	0.294	1	0.308	1	0.071	1	0.504	1	0.281	1	leukocyte activation during immune response	P
GO:0002367	13	0.38	1	0.677	1	0.788	1	0.868	1	0.302	1	0.537	1	0.287	1	0.587	1	cytokine production during immune response	P
GO:0002376	994	0.915	1	0.728	1	0.963	1	0.624	1	0.851	1	0.726	1	0.619	1	0.699	1	immune system process	P
GO:0002377	39	0.199	1	0.104	1	0.566	1	0.25	1	0.0843	1	0.0823	1	0.947	1	0.543	1	immunoglobulin production	P
GO:0002381	25	0.414	1	0.112	1	0.587	1	0.245	1	0.245	1	0.0933	1	0.996	1	0.613	1	immunoglobulin production during immune response	P
GO:0002429	37	0.0093	0.667	0.231	1	0.0856	1	0.285	1	0.00892	0.539	0.239	1	0.373	1	0.304	1	immune response-activating cell surface receptor signaling pathway	P
GO:0002437	59	0.472	1	0.308	1	0.223	1	0.624	1	0.576	1	0.208	1	0.559	1	0.431	1	inflammatory response to antigenic stimulus	P
GO:0002438	54	0.507	1	0.369	1	0.186	1	0.572	1	0.672	1	0.254	1	0.545	1	0.686	1	acute inflammatory response to antigenic stimulus	P
GO:0002440	47	0.272	1	0.202	1	0.647	1	0.542	1	0.122	1	0.108	1	0.962	1	0.718	1	production of molecular mediator of immune response	P
GO:0002443	159	0.359	1	0.228	1	0.421	1	0.288	1	0.323	1	0.189	1	0.444	1	0.71	1	leukocyte mediated immunity	P
GO:0002444	12	0.0115	0.667	0.163	1	0.00553	0.419	0.202	1	0.0122	0.539	0.237	1	0.8	1	0.164	1	myeloid leukocyte mediated immunity	P
GO:0002449	149	0.551	1	0.309	1	0.665	1	0.397	1	0.501	1	0.208	1	0.415	1	0.876	1	lymphocyte mediated immunity	P
GO:0002455	30	0.979	1	0.901	1	0.994	1	0.679	1	0.915	1	0.825	1	0.929	1	0.926	1	humoral immune response mediated by circulating immunoglobulin	P
GO:0002456	18	0.103	1	0.165	1	0.342	1	0.314	1	0.0889	1	0.155	1	0.081	1	0.364	1	T cell mediated immunity	P
GO:0002460	151	0.55	1	0.27	1	0.49	1	0.429	1	0.549	1	0.193	1	0.556	1	0.743	1	adaptive immune response (sensu Gnathostomata)	P
GO:0002474	16	0.928	1	0.737	1	0.908	1	0.3	1	0.917	1	0.691	1	0.547	1	0.992	1	antigen processing and presentation of peptide antigen via MHC class I	P
GO:0002504	19	0.999	1	1	1	1	1	1	1	0.993	1	0.995	1	0.585	1	0.764	1	antigen processing and presentation of peptide or polysaccharide antigen via MHC class II	P
GO:0002520	264	0.0199	1	0.0454	1	0.0791	1	0.0207	1	0.00961	0.539	0.163	1	0.57	1	0.0912	1	immune system development	P
GO:0002521	138	0.318	1	0.235	1	0.256	1	0.368	1	0.281	1	0.33	1	0.848	1	0.0697	1	leukocyte differentiation	P
GO:0002524	54	0.507	1	0.369	1	0.186	1	0.572	1	0.672	1	0.254	1	0.545	1	0.686	1	hypersensitivity	P
GO:0002526	126	0.991	1	0.914	1	0.9	1	0.875	1	0.997	1	0.852	1	0.626	1	0.952	1	acute inflammatory response	P
GO:0002541	36	0.993	1	0.864	1	0.991	1	0.852	1	0.973	1	0.78	1	0.92	1	0.629	1	activation of plasma proteins during acute inflammatory response	P
GO:0002562	26	0.315	1	0.0683	1	0.639	1	0.209	1	0.177	1	0.0613	1	0.854	1	0.384	1	somatic diversification of immune receptors via germline recombination within a single locus	P
GO:0002573	45	0.794	1	0.465	1	0.463	1	0.519	1	0.837	1	0.514	1	0.985	1	0.255	1	myeloid leukocyte differentiation	P
GO:0002682	121	0.515	1	0.331	1	0.721	1	0.477	1	0.391	1	0.45	1	0.621	1	0.0895	1	regulation of immune system process	P
GO:0002683	15	0.178	1	0.108	1	0.121	1	0.217	1	0.279	1	0.124	1	0.0891	1	0.114	1	negative regulation of immune system process	P
GO:0002684	103	0.565	1	0.618	1	0.827	1	0.64	1	0.385	1	0.669	1	0.76	1	0.262	1	positive regulation of immune system process	P
GO:0002697	20	0.596	1	0.692	1	0.459	1	0.719	1	0.646	1	0.596	1	0.518	1	0.926	1	regulation of immune effector process	P
GO:0002699	17	0.881	1	0.873	1	0.866	1	0.767	1	0.799	1	0.759	1	0.896	1	1	1	positive regulation of immune effector process	P
GO:0002703	19	0.495	1	0.651	1	0.392	1	0.694	1	0.547	1	0.55	1	0.448	1	0.9	1	regulation of leukocyte mediated immunity	P
GO:0002705	16	0.813	1	0.841	1	0.813	1	0.742	1	0.713	1	0.717	1	0.85	1	1	1	positive regulation of leukocyte mediated immunity	P
GO:0002706	19	0.495	1	0.651	1	0.392	1	0.694	1	0.547	1	0.55	1	0.448	1	0.9	1	regulation of lymphocyte mediated immunity	P
GO:0002708	16	0.813	1	0.841	1	0.813	1	0.742	1	0.713	1	0.717	1	0.85	1	1	1	positive regulation of lymphocyte mediated immunity	P
GO:0002757	40	0.00782	0.634	0.192	1	0.0675	1	0.23	1	0.00749	0.539	0.227	1	0.364	1	0.166	1	immune response-activating signal transduction	P
GO:0002761	22	0.967	1	0.76	1	0.96	1	0.766	1	0.932	1	0.733	1	0.965	1	0.622	1	regulation of myeloid leukocyte differentiation	P
GO:0002762	13	0.978	1	0.619	1	0.995	1	0.722	1	0.958	1	0.507	1	0.871	1	0.843	1	negative regulation of myeloid leukocyte differentiation	P
GO:0002764	42	0.0138	0.667	0.223	1	0.112	1	0.279	1	0.00985	0.539	0.252	1	0.446	1	0.218	1	immune response-regulating signal transduction	P
GO:0002768	39	0.0168	0.667	0.27	1	0.142	1	0.344	1	0.0118	0.539	0.267	1	0.456	1	0.386	1	immune response-regulating cell surface receptor signaling pathway	P
GO:0002790	42	0.759	1	0.699	1	0.474	1	0.87	1	0.681	1	0.577	1	0.986	1	0.665	1	peptide secretion	P
GO:0002819	19	0.156	1	0.342	1	0.198	1	0.402	1	0.133	1	0.276	1	0.444	1	0.728	1	regulation of adaptive immune response	P
GO:0002821	14	0.322	1	0.503	1	0.586	1	0.401	1	0.188	1	0.446	1	0.848	1	0.867	1	positive regulation of adaptive immune response	P
GO:0002822	19	0.156	1	0.342	1	0.198	1	0.402	1	0.133	1	0.276	1	0.444	1	0.728	1	regulation of adaptive immune response (sensu Gnathostomata)	P
GO:0002824	14	0.322	1	0.503	1	0.586	1	0.401	1	0.188	1	0.446	1	0.848	1	0.867	1	positive regulation of adaptive immune response (sensu Gnathostomata)	P
GO:0003674	16170	0	0	0	0	1.37e-34	0	2.38e-44	0	0	0	0	0	4.9e-24	0	8.51e-30	0	molecular_function	F
GO:0003676	3675	0	0	0	0	4.8e-17	0	4.03e-22	0	2.8e-45	0	0	0	4.03e-18	0	2.92e-21	0	nucleic acid binding	F
GO:0003677	2636	1.23e-20	0	2e-26	0	7.95e-07	0.00242	1.05e-10	0	4.56e-20	0	1.8e-23	0	5.41e-10	0	5.61e-11	0.000771	DNA binding	F
GO:0003678	37	0.0353	1	0.00975	0.518	0.0211	1	0.173	1	0.196	1	0.00498	0.27	0.0317	1	0.423	1	DNA helicase activity	F
GO:0003682	123	0.00352	0.273	0.000239	0.0419	0.179	1	0.0132	0.818	0.00371	0.285	0.000413	0.041	0.0442	1	0.00476	0.36	chromatin binding	F
GO:0003684	53	0.0302	1	0.0445	1	0.0434	1	0.0162	0.818	0.0981	1	0.109	1	0.0336	1	0.298	1	damaged DNA binding	F
GO:0003688	11	0.0975	1	0.0196	1	0.322	1	0.0586	1	0.0515	1	0.124	1	0.648	1	0.187	1	DNA replication origin binding	F
GO:0003690	68	0.0047	0.328	0.0213	1	0.0779	1	0.0565	1	0.00415	0.285	0.0192	1	0.102	1	0.687	1	double-stranded DNA binding	F
GO:0003697	49	0.00113	0.096	0.000168	0.015	0.0201	1	0.021	1	0.00269	0.285	0.000654	0.0549	0.0504	1	0.00338	0.185	single-stranded DNA binding	F
GO:0003700	1045	0.112	1	0.27	1	0.184	1	0.193	1	0.101	1	0.396	1	0.418	1	0.334	1	transcription factor activity	F
GO:0003702	229	0.00015	0.025	0.000453	0.069	0.0037	0.327	0.000373	0.042	0.000294	0.017	0.00287	0.239	0.0182	0.911	0.166	1	RNA polymerase II transcription factor activity	F
GO:0003704	36	0.435	1	0.306	1	0.818	1	0.14	1	0.264	1	0.387	1	0.741	1	0.528	1	specific RNA polymerase II transcription factor activity	F
GO:0003705	34	0.578	1	0.288	1	0.789	1	0.313	1	0.528	1	0.274	1	0.333	1	0.829	1	RNA polymerase II transcription factor activity, enhancer binding	F
GO:0003707	56	0.502	1	0.62	1	0.152	1	0.162	1	0.524	1	0.787	1	0.902	1	0.802	1	steroid hormone receptor activity	F
GO:0003708	27	0.791	1	0.883	1	0.592	1	0.972	1	0.668	1	0.834	1	1	1	0.693	1	retinoic acid receptor activity	F
GO:0003709	10	0.000202	0.025	0.0232	1	0.044	1	0.214	1	0.000861	0.044	0.0315	1	0.165	1	0.131	1	RNA polymerase III transcription factor activity	F
GO:0003711	21	0.0111	0.667	0.0284	1	0.0469	1	0.248	1	0.0235	1	0.0408	1	0.027	1	0.03	1	transcriptional elongation regulator activity	F
GO:0003712	310	4.45e-09	0.000806	5.29e-08	0.00497	7.62e-07	0.00242	3.13e-06	0.008	2.29e-08	0.000964	3.06e-06	0.00297	0.0436	1	0.00304	0.185	transcription cofactor activity	F
GO:0003713	184	2.68e-07	0.00195	1.5e-07	0.00497	8.05e-07	0.00242	8.99e-05	0.012	7.5e-06	0.00288	3.08e-06	0.00297	0.0202	0.911	0.00756	0.481	transcription coactivator activity	F
GO:0003714	119	0.00166	0.202	0.00914	0.503	0.035	1	0.00361	0.202	0.000467	0.022	0.0476	1	0.374	1	0.0376	1	transcription corepressor activity	F
GO:0003723	719	2.01e-35	0	2.23e-34	0	3.26e-19	0	1.14e-14	0	9.28e-31	0	1.86e-29	0	6.31e-10	0	9.54e-13	0	RNA binding	F
GO:0003724	27	5.45e-05	0.011	0.000931	0.069	0.000503	0.036	0.0118	0.818	0.011	0.539	0.000335	0.0307	0.0329	1	0.592	1	RNA helicase activity	F
GO:0003725	35	0.0679	1	0.0046	0.36	0.174	1	0.0485	1	0.0976	1	0.0169	0.86	0.13	1	0.0279	1	double-stranded RNA binding	F
GO:0003727	23	0.00381	0.328	0.0306	1	0.0569	1	0.24	1	0.00809	0.539	0.038	1	0.0187	0.911	0.0332	1	single-stranded RNA binding	F
GO:0003729	48	0.00287	0.239	0.00111	0.091	0.00245	0.248	0.0231	1	0.0119	0.539	0.00811	0.739	0.0704	1	0.00025	0.027	mRNA binding	F
GO:0003735	291	1.44e-11	0	5.86e-05	0.00958	3.22e-05	0.006	0.0993	1	1.07e-09	0.000964	5.13e-05	0.017	1.37e-06	0.00195	0.00513	0.36	structural constituent of ribosome	F
GO:0003743	63	1.99e-07	0.00195	6.71e-08	0.00497	0.000201	0.024	0.002	0.124	5.9e-07	0.00245	1.25e-06	0.00297	0.01	0.63	0.00142	0.0916	translation initiation factor activity	F
GO:0003746	18	0.113	1	0.0446	1	0.52	1	0.174	1	0.0732	1	0.0323	1	0.201	1	0.194	1	translation elongation factor activity	F
GO:0003755	44	0.0121	0.667	0.0729	1	0.0259	1	0.267	1	0.052	1	0.0674	1	0.00955	0.63	0.343	1	peptidyl-prolyl cis-trans isomerase activity	F
GO:0003774	161	0.00893	0.634	0.00015	0.015	0.00101	0.098	0.00128	0.115	0.0347	1	0.00025	0.026	0.364	1	0.204	1	motor activity	F
GO:0003777	82	0.00565	0.35	0.0275	1	0.00134	0.098	0.00551	0.346	0.0147	1	0.058	1	0.457	1	0.698	1	microtubule motor activity	F
GO:0003779	325	0.0115	0.667	8.3e-05	0.01	0.000399	0.036	0.00931	0.713	0.0214	1	9.13e-05	0.017	0.91	1	0.0118	0.647	actin binding	F
GO:0003796	12	0.68	1	0.84	1	0.426	1	0.482	1	0.838	1	0.903	1	0.381	1	0.862	1	lysozyme activity	F
GO:0003823	62	1	1	1	1	1	1	0.992	1	1	1	1	1	0.72	1	0.938	1	antigen binding	F
GO:0003824	5697	0	0	0	0	1.28e-25	0	7.25e-29	0	3.64e-42	0	0	0	1.19e-11	0	9.15e-21	0	catalytic activity	F
GO:0003840	13	0.198	1	0.301	1	0.239	1	0.566	1	0.234	1	0.246	1	0.46	1	0.363	1	gamma-glutamyltransferase activity	F
GO:0003854	17	0.871	1	1	1	0.801	1	0.998	1	0.952	1	0.999	1	0.373	1	0.942	1	3-beta-hydroxy-delta5-steroid dehydrogenase activity	F
GO:0003887	30	0.0256	1	0.0595	1	0.291	1	0.0595	1	0.00276	0.285	0.0932	1	0.987	1	0.27	1	DNA-directed DNA polymerase activity	F
GO:0003899	49	0.000429	0.0337	0.00124	0.091	0.00926	0.46	0.00439	0.346	0.013	1	0.0156	0.763	0.000465	0.065	0.0908	1	DNA-directed RNA polymerase activity	F
GO:0003916	22	0.06	1	0.553	1	0.243	1	0.149	1	0.117	1	0.676	1	0.145	1	0.857	1	DNA topoisomerase activity	F
GO:0003918	17	0.163	1	0.639	1	0.177	1	0.226	1	0.336	1	0.803	1	0.231	1	0.653	1	DNA topoisomerase (ATP-hydrolyzing) activity	F
GO:0003924	259	1.49e-06	0.00195	7.86e-05	0.01	0.0137	0.693	0.0435	1	1.4e-06	0.0026	2.36e-05	0.00763	8.42e-05	0.025	0.0331	1	GTPase activity	F
GO:0003950	24	0.193	1	0.0542	1	0.351	1	0.00742	0.455	0.218	1	0.21	1	0.369	1	0.319	1	NAD+ ADP-ribosyltransferase activity	F
GO:0003954	45	0.00352	0.273	0.0345	1	0.0659	1	0.129	1	0.00696	0.539	0.0839	1	0.0453	1	0.0789	1	NADH dehydrogenase activity	F
GO:0003993	16	0.107	1	0.32	1	0.0423	1	0.0668	1	0.147	1	0.689	1	0.3	1	0.566	1	acid phosphatase activity	F
GO:0003995	16	0.199	1	0.206	1	0.0545	1	0.105	1	0.231	1	0.273	1	0.907	1	0.466	1	acyl-CoA dehydrogenase activity	F
GO:0004003	24	0.24	1	0.0558	1	0.301	1	0.217	1	0.376	1	0.0481	1	0.146	1	0.438	1	ATP-dependent DNA helicase activity	F
GO:0004004	19	0.000664	0.0344	0.00464	0.36	0.0101	0.46	0.0139	0.818	0.033	1	0.00373	0.27	0.0151	0.647	0.32	1	ATP-dependent RNA helicase activity	F
GO:0004012	15	0.7	1	0.471	1	0.516	1	0.416	1	0.438	1	0.616	1	1	1	0.146	1	phospholipid-translocating ATPase activity	F
GO:0004016	11	0.748	1	0.0986	1	0.814	1	0.0677	1	0.488	1	0.0787	1	0.928	1	0.592	1	adenylate cyclase activity	F
GO:0004022	33	0.791	1	0.618	1	0.835	1	0.517	1	0.804	1	0.704	1	0.115	1	0.151	1	alcohol dehydrogenase activity	F
GO:0004033	15	0.794	1	0.658	1	0.319	1	0.878	1	0.931	1	0.584	1	0.835	1	0.606	1	aldo-keto reductase activity	F
GO:0004065	12	0.52	1	0.414	1	0.292	1	0.255	1	0.827	1	0.329	1	0.478	1	1	1	arylsulfatase activity	F
GO:0004089	21	0.0451	1	0.135	1	0.0714	1	0.0406	1	0.0406	1	0.179	1	0.563	1	0.494	1	carbonate dehydratase activity	F
GO:0004091	23	0.000104	0.016	0.0429	1	7.76e-05	0.012	0.000923	0.059	0.00083	0.044	0.281	1	0.596	1	0.105	1	carboxylesterase activity	F
GO:0004104	13	0.199	1	0.239	1	0.0435	1	0.0439	1	0.282	1	0.457	1	0.718	1	0.324	1	cholinesterase activity	F
GO:0004112	25	0.97	1	0.938	1	0.912	1	0.694	1	0.958	1	0.959	1	0.895	1	0.948	1	cyclic-nucleotide phosphodiesterase activity	F
GO:0004114	24	0.985	1	0.998	1	0.939	1	0.975	1	0.984	1	0.996	1	0.869	1	0.998	1	3',5'-cyclic-nucleotide phosphodiesterase activity	F
GO:0004129	28	0.216	1	0.0664	1	0.117	1	0.183	1	0.284	1	0.073	1	0.897	1	0.147	1	cytochrome-c oxidase activity	F
GO:0004143	15	0.619	1	0.629	1	0.318	1	0.911	1	0.597	1	0.42	1	0.982	1	0.546	1	diacylglycerol kinase activity	F
GO:0004175	459	0.0529	1	0.00845	0.503	0.0765	1	0.079	1	0.0722	1	0.0123	0.739	0.169	1	0.0203	1	endopeptidase activity	F
GO:0004176	19	0.0231	1	0.418	1	0.0262	1	0.871	1	0.0503	1	0.369	1	0.036	1	0.214	1	ATP-dependent peptidase activity	F
GO:0004177	46	0.258	1	0.0581	1	0.331	1	0.0533	1	0.344	1	0.108	1	0.163	1	0.116	1	aminopeptidase activity	F
GO:0004179	11	0.628	1	0.2	1	0.945	1	0.276	1	0.555	1	0.354	1	0.265	1	0.0843	1	membrane alanyl aminopeptidase activity	F
GO:0004180	43	0.937	1	0.891	1	0.706	1	0.893	1	0.946	1	0.892	1	0.739	1	0.616	1	carboxypeptidase activity	F
GO:0004181	30	0.979	1	0.979	1	0.576	1	0.92	1	0.997	1	0.977	1	0.779	1	0.771	1	metallocarboxypeptidase activity	F
GO:0004182	25	0.97	1	0.96	1	0.612	1	0.904	1	0.996	1	0.923	1	0.694	1	0.883	1	carboxypeptidase A activity	F
GO:0004185	10	0.563	1	0.436	1	0.335	1	0.812	1	0.426	1	0.311	1	1	1	0.553	1	serine carboxypeptidase activity	F
GO:0004190	34	0.0332	1	0.0542	1	0.42	1	0.499	1	0.0202	1	0.0242	1	0.0415	1	0.242	1	aspartic-type endopeptidase activity	F
GO:0004194	11	0.108	1	0.453	1	0.546	1	0.399	1	0.107	1	0.182	1	0.282	1	1	1	pepsin A activity	F
GO:0004197	89	0.136	1	0.0274	1	0.118	1	0.0168	0.818	0.108	1	0.0591	1	0.506	1	0.267	1	cysteine-type endopeptidase activity	F
GO:0004198	16	0.398	1	0.429	1	0.383	1	0.265	1	0.296	1	0.493	1	0.736	1	0.635	1	calpain activity	F
GO:0004221	77	0.52	1	0.0351	1	0.507	1	0.0427	1	0.49	1	0.0476	1	0.551	1	0.358	1	ubiquitin thiolesterase activity	F
GO:0004222	107	0.865	1	0.626	1	0.106	1	0.905	1	0.973	1	0.402	1	0.96	1	0.74	1	metalloendopeptidase activity	F
GO:0004252	207	0.0964	1	0.131	1	0.343	1	0.174	1	0.0851	1	0.266	1	0.102	1	0.0155	0.849	serine-type endopeptidase activity	F
GO:0004289	25	0.219	1	0.282	1	0.216	1	0.271	1	0.22	1	0.429	1	0.442	1	0.142	1	subtilase activity	F
GO:0004298	21	0.103	1	0.017	1	0.6	1	0.0805	1	0.109	1	0.0206	1	0.0418	1	0.0555	1	threonine endopeptidase activity	F
GO:0004303	11	0.731	1	0.19	1	0.679	1	0.141	1	0.665	1	0.261	1	0.533	1	0.0801	1	estradiol 17-beta-dehydrogenase activity	F
GO:0004364	22	0.817	1	0.979	1	0.376	1	0.936	1	0.918	1	0.995	1	0.859	1	0.135	1	glutathione transferase activity	F
GO:0004385	10	0.936	1	0.197	1	0.749	1	0.0406	1	0.957	1	0.77	1	0.57	1	0.286	1	guanylate kinase activity	F
GO:0004386	146	1.69e-07	0.00195	6.19e-09	0.00497	2.81e-07	0.00242	4.03e-05	0.008	0.000487	0.022	2.23e-08	0.000837	3.03e-05	0.00544	0.0015	0.0916	helicase activity	F
GO:0004402	27	0.00298	0.239	0.00682	0.36	0.0324	1	0.311	1	0.0112	0.539	0.00928	0.739	0.0181	0.911	0.0184	1	histone acetyltransferase activity	F
GO:0004407	19	0.247	1	0.357	1	0.457	1	0.74	1	0.138	1	0.219	1	0.577	1	0.346	1	histone deacetylase activity	F
GO:0004428	41	0.000698	0.0344	0.000817	0.069	0.00722	0.46	0.000109	0.012	0.00615	0.539	0.0208	1	0.0113	0.63	0.00543	0.36	inositol or phosphatidylinositol kinase activity	F
GO:0004434	26	0.964	1	0.995	1	0.95	1	0.989	1	0.98	1	0.965	1	0.23	1	1	1	inositol or phosphatidylinositol phosphodiesterase activity	F
GO:0004435	26	0.964	1	0.995	1	0.95	1	0.989	1	0.98	1	0.965	1	0.23	1	1	1	phosphoinositide phospholipase C activity	F
GO:0004437	37	0.57	1	0.101	1	0.691	1	0.51	1	0.797	1	0.0778	1	0.0124	0.63	0.135	1	inositol or phosphatidylinositol phosphatase activity	F
GO:0004467	10	0.618	1	0.572	1	0.848	1	0.708	1	0.567	1	0.45	1	0.304	1	0.603	1	long-chain-fatty-acid-CoA ligase activity	F
GO:0004468	27	0.00298	0.239	0.00682	0.36	0.0324	1	0.311	1	0.0112	0.539	0.00928	0.739	0.0181	0.911	0.0184	1	lysine N-acetyltransferase activity	F
GO:0004497	136	1	1	1	1	0.997	1	1	1	1	1	0.994	1	0.992	1	0.995	1	monooxygenase activity	F
GO:0004499	21	0.635	1	0.67	1	0.691	1	0.889	1	0.602	1	0.466	1	0.632	1	0.994	1	dimethylaniline monooxygenase (N-oxide-forming) activity	F
GO:0004518	153	0.000391	0.0337	0.0149	1	0.00524	0.419	0.14	1	0.00106	0.078	0.00473	0.27	0.186	1	0.427	1	nuclease activity	F
GO:0004519	93	0.0164	0.667	0.0551	1	0.0678	1	0.3	1	0.0137	1	0.0241	1	0.719	1	0.315	1	endonuclease activity	F
GO:0004520	19	0.143	1	0.471	1	0.125	1	0.691	1	0.165	1	0.418	1	0.478	1	0.368	1	endodeoxyribonuclease activity	F
GO:0004521	43	0.296	1	0.0458	1	0.528	1	0.428	1	0.153	1	0.0104	0.739	0.931	1	0.4	1	endoribonuclease activity	F
GO:0004522	17	0.988	1	0.805	1	0.975	1	0.984	1	0.849	1	0.238	1	0.839	1	0.919	1	pancreatic ribonuclease activity	F
GO:0004526	11	0.0199	1	0.128	1	0.0359	1	0.0731	1	0.0183	1	0.214	1	0.665	1	0.237	1	ribonuclease P activity	F
GO:0004527	53	0.0859	1	0.229	1	0.116	1	0.326	1	0.149	1	0.181	1	0.218	1	0.521	1	exonuclease activity	F
GO:0004529	10	0.965	1	0.906	1	0.321	1	0.609	1	1	1	0.895	1	0.874	1	0.886	1	exodeoxyribonuclease activity	F
GO:0004532	13	0.00743	0.634	0.204	1	0.0629	1	0.227	1	0.00849	0.539	0.499	1	0.108	1	0.117	1	exoribonuclease activity	F
GO:0004536	33	0.0518	1	0.232	1	0.0274	1	0.332	1	0.115	1	0.305	1	0.168	1	0.205	1	deoxyribonuclease activity	F
GO:0004540	64	0.0295	1	0.0225	1	0.152	1	0.342	1	0.0184	1	0.00749	0.53	0.724	1	0.25	1	ribonuclease activity	F
GO:0004549	13	0.0226	1	0.0501	1	0.0572	1	0.0886	1	0.0142	1	0.0662	1	0.798	1	0.191	1	tRNA-specific ribonuclease activity	F
GO:0004550	11	0.0248	1	0.166	1	0.0236	1	0.163	1	0.0363	1	0.235	1	0.188	1	0.238	1	nucleoside diphosphate kinase activity	F
GO:0004553	130	0.234	1	0.123	1	0.514	1	0.353	1	0.161	1	0.112	1	0.344	1	0.182	1	hydrolase activity, hydrolyzing O-glycosyl compounds	F
GO:0004601	47	0.716	1	0.796	1	0.676	1	0.684	1	0.511	1	0.859	1	0.988	1	0.652	1	peroxidase activity	F
GO:0004602	10	0.368	1	0.442	1	0.2	1	0.443	1	0.391	1	0.505	1	0.578	1	0.25	1	glutathione peroxidase activity	F
GO:0004620	90	0.839	1	0.906	1	0.34	1	0.99	1	0.939	1	0.746	1	0.42	1	0.622	1	phospholipase activity	F
GO:0004622	11	0.954	1	0.949	1	0.428	1	0.968	1	0.879	1	0.939	1	1	1	0.216	1	lysophospholipase activity	F
GO:0004623	39	0.839	1	0.662	1	0.338	1	0.831	1	0.894	1	0.526	1	0.874	1	0.472	1	phospholipase A2 activity	F
GO:0004629	35	0.973	1	0.983	1	0.942	1	0.979	1	0.99	1	0.939	1	0.161	1	0.986	1	phospholipase C activity	F
GO:0004653	18	1	1	0.994	1	0.927	1	0.973	1	1	1	0.972	1	0.999	1	1	1	polypeptide N-acetylgalactosaminyltransferase activity	F
GO:0004659	14	0.214	1	0.116	1	0.294	1	0.112	1	0.32	1	0.209	1	0.222	1	0.219	1	prenyltransferase activity	F
GO:0004672	655	0.000321	0.0337	9.37e-11	0	0.0283	1	4.73e-07	0.00196	0.000116	0.017	9.18e-09	0.000837	0.163	1	5.75e-05	0.009	protein kinase activity	F
GO:0004673	13	0.263	1	0.531	1	0.231	1	0.559	1	0.178	1	0.709	1	0.939	1	0.0566	1	protein histidine kinase activity	F
GO:0004674	534	1.09e-06	0.00195	7.82e-15	0	0.00211	0.248	1.27e-10	0	1.13e-06	0.0026	2.79e-12	0	0.0262	1	5.92e-05	0.009	protein serine/threonine kinase activity	F
GO:0004675	15	0.819	1	0.438	1	0.994	1	0.279	1	0.668	1	0.639	1	0.546	1	0.181	1	transmembrane receptor protein serine/threonine kinase activity	F
GO:0004683	28	0.489	1	0.112	1	0.715	1	0.606	1	0.387	1	0.0535	1	0.719	1	0.364	1	calmodulin regulated protein kinase activity	F
GO:0004689	20	0.637	1	0.444	1	0.929	1	0.801	1	0.504	1	0.383	1	0.788	1	0.237	1	phosphorylase kinase activity	F
GO:0004690	10	0.428	1	0.541	1	0.176	1	0.351	1	0.594	1	0.767	1	0.597	1	0.203	1	cyclic nucleotide-dependent protein kinase activity	F
GO:0004693	28	0.0058	0.35	0.00152	0.091	0.128	1	0.117	1	0.00905	0.539	0.000654	0.0549	0.0774	1	0.178	1	cyclin-dependent protein kinase activity	F
GO:0004697	15	0.466	1	0.105	1	0.559	1	0.326	1	0.471	1	0.0708	1	0.543	1	0.336	1	protein kinase C activity	F
GO:0004702	58	0.0666	1	0.0517	1	0.368	1	0.00874	0.713	0.0376	1	0.135	1	0.165	1	0.24	1	receptor signaling protein serine/threonine kinase activity	F
GO:0004707	19	0.0768	1	0.0148	1	0.219	1	0.0335	1	0.0826	1	0.0127	0.739	0.0407	1	0.166	1	MAP kinase activity	F
GO:0004708	13	0.742	1	0.239	1	0.604	1	0.188	1	0.647	1	0.303	1	0.989	1	0.308	1	MAP kinase kinase activity	F
GO:0004709	18	0.186	1	0.589	1	0.106	1	0.0633	1	0.2	1	0.915	1	0.895	1	0.895	1	MAP kinase kinase kinase activity	F
GO:0004712	14	0.794	1	0.283	1	0.6	1	0.191	1	0.706	1	0.384	1	0.995	1	0.262	1	protein threonine/tyrosine kinase activity	F
GO:0004713	552	0.00332	0.273	3.48e-10	0	0.117	1	1.6e-06	0.002	0.000918	0.044	1.05e-08	0.000837	0.229	1	0.000133	0.02	protein-tyrosine kinase activity	F
GO:0004714	120	0.999	1	0.959	1	1	1	0.997	1	0.994	1	0.909	1	0.891	1	0.633	1	transmembrane receptor protein tyrosine kinase activity	F
GO:0004715	39	0.22	1	0.0535	1	0.268	1	0.00666	0.453	0.176	1	0.118	1	0.507	1	0.539	1	non-membrane spanning protein tyrosine kinase activity	F
GO:0004716	12	0.188	1	0.0204	1	0.496	1	0.00953	0.713	0.121	1	0.0301	1	0.158	1	0.221	1	receptor signaling protein tyrosine kinase activity	F
GO:0004721	174	0.0143	0.667	2.56e-05	0.00958	0.0647	1	0.00181	0.124	0.0233	1	3.06e-05	0.012	0.183	1	0.023	1	phosphoprotein phosphatase activity	F
GO:0004722	43	0.0499	1	0.000579	0.069	0.0774	1	0.0055	0.346	0.0859	1	0.00123	0.064	0.288	1	0.105	1	protein serine/threonine phosphatase activity	F
GO:0004725	118	0.279	1	0.0291	1	0.529	1	0.0821	1	0.217	1	0.0365	1	0.395	1	0.0718	1	protein tyrosine phosphatase activity	F
GO:0004745	10	0.874	1	0.903	1	0.682	1	0.617	1	0.958	1	0.967	1	0.494	1	0.612	1	retinol dehydrogenase activity	F
GO:0004765	10	0.292	1	0.578	1	0.47	1	0.252	1	0.244	1	0.626	1	0.24	1	0.973	1	shikimate kinase activity	F
GO:0004806	17	0.372	1	0.519	1	0.285	1	0.986	1	0.55	1	0.539	1	0.218	1	0.133	1	triacylglycerol lipase activity	F
GO:0004812	73	0.00146	0.202	0.00495	0.36	0.00969	0.46	0.0768	1	0.0029	0.285	0.00736	0.53	0.106	1	0.0987	1	aminoacyl-tRNA ligase activity	F
GO:0004835	14	0.168	1	0.06	1	0.341	1	0.0639	1	0.0923	1	0.118	1	0.697	1	0.177	1	tubulin-tyrosine ligase activity	F
GO:0004842	159	3.53e-06	0.007	3.31e-07	0.00839	0.000299	0.036	0.000487	0.047	1.2e-05	0.004	8.03e-07	0.00297	0.128	1	0.00797	0.481	ubiquitin-protein ligase activity	F
GO:0004843	80	0.49	1	0.0193	1	0.599	1	0.0252	1	0.446	1	0.041	1	0.448	1	0.174	1	ubiquitin-specific protease activity	F
GO:0004857	299	0.875	1	0.707	1	0.997	1	0.742	1	0.722	1	0.655	1	0.256	1	0.519	1	enzyme inhibitor activity	F
GO:0004859	18	0.551	1	0.684	1	0.421	1	0.889	1	0.705	1	0.516	1	0.338	1	0.497	1	phospholipase inhibitor activity	F
GO:0004860	31	0.168	1	0.0809	1	0.401	1	0.0611	1	0.091	1	0.219	1	0.571	1	0.194	1	protein kinase inhibitor activity	F
GO:0004861	10	0.184	1	0.152	1	0.566	1	0.331	1	0.0961	1	0.244	1	0.327	1	0.148	1	cyclin-dependent protein kinase inhibitor activity	F
GO:0004864	25	0.603	1	0.187	1	0.882	1	0.145	1	0.441	1	0.317	1	0.644	1	0.119	1	protein phosphatase inhibitor activity	F
GO:0004866	169	1	1	1	1	1	1	0.997	1	0.997	1	0.999	1	0.657	1	0.997	1	endopeptidase inhibitor activity	F
GO:0004867	117	0.997	1	0.995	1	0.999	1	0.98	1	0.987	1	0.973	1	0.684	1	0.997	1	serine-type endopeptidase inhibitor activity	F
GO:0004869	30	0.972	1	0.947	1	1	1	0.975	1	0.911	1	0.965	1	0.455	1	0.533	1	cysteine protease inhibitor activity	F
GO:0004871	2793	1	1	1	1	1	1	1	1	1	1	1	1	1	1	0.995	1	signal transducer activity	F
GO:0004872	2305	1	1	1	1	1	1	1	1	1	1	1	1	1	1	1	1	receptor activity	F
GO:0004879	181	0.394	1	0.048	1	0.0118	0.532	0.0166	0.818	0.612	1	0.0727	1	0.837	1	0.386	1	ligand-dependent nuclear receptor activity	F
GO:0004886	12	0.991	1	0.685	1	0.963	1	0.809	1	0.966	1	0.639	1	1	1	0.58	1	retinoid-X receptor activity	F
GO:0004887	21	0.262	1	0.25	1	0.375	1	0.369	1	0.204	1	0.185	1	0.656	1	0.572	1	thyroid hormone receptor activity	F
GO:0004888	1691	1	1	1	1	1	1	1	1	1	1	1	1	1	1	1	1	transmembrane receptor activity	F
GO:0004889	18	0.241	1	0.25	1	0.279	1	0.145	1	0.172	1	0.42	1	0.99	1	0.0929	1	nicotinic acetylcholine-activated cation-selective channel activity	F
GO:0004890	32	0.93	1	1	1	0.983	1	1	1	0.906	1	0.996	1	0.607	1	1	1	GABA-A receptor activity	F
GO:0004896	83	0.859	1	0.836	1	0.785	1	0.824	1	0.755	1	0.725	1	0.935	1	0.879	1	hematopoietin/interferon-class (D200-domain) cytokine receptor activity	F
GO:0004907	61	0.965	1	0.959	1	0.947	1	0.834	1	0.887	1	0.92	1	0.999	1	0.998	1	interleukin receptor activity	F
GO:0004908	28	1	1	1	1	1	1	1	1	1	1	1	1	0.999	1	1	1	interleukin-1 receptor activity	F
GO:0004918	10	1	1	0.765	1	0.767	1	0.228	1	0.999	1	0.792	1	1	1	1	1	interleukin-8 receptor activity	F
GO:0004926	16	0.116	1	0.185	1	0.0843	1	0.0575	1	0.139	1	0.263	1	0.59	1	0.999	1	non-G-protein coupled 7TM receptor activity	F
GO:0004930	1212	1	1	1	1	1	1	1	1	1	1	1	1	1	1	1	1	G-protein coupled receptor activity	F
GO:0004935	43	0.949	1	0.888	1	0.754	1	0.539	1	0.857	1	0.942	1	0.992	1	0.7	1	adrenoceptor activity	F
GO:0004936	17	0.699	1	0.589	1	0.382	1	0.153	1	0.725	1	0.788	1	0.664	1	0.921	1	alpha-adrenergic receptor activity	F
GO:0004938	10	0.0783	1	0.383	1	0.25	1	0.151	1	0.094	1	0.597	1	0.247	1	0.764	1	alpha2-adrenergic receptor activity	F
GO:0004939	11	0.752	1	0.625	1	0.647	1	0.833	1	0.464	1	0.464	1	1	1	0.784	1	beta-adrenergic receptor activity	F
GO:0004942	15	0.0502	1	0.0611	1	0.334	1	0.0602	1	0.0108	0.539	0.05	1	0.391	1	0.545	1	anaphylatoxin receptor activity	F
GO:0004945	66	0.995	1	0.926	1	0.95	1	0.913	1	0.974	1	0.848	1	1	1	0.991	1	angiotensin type II receptor activity	F
GO:0004946	18	0.965	1	1	1	0.973	1	1	1	0.835	1	0.997	1	1	1	0.978	1	bombesin receptor activity	F
GO:0004947	36	0.993	1	0.423	1	0.996	1	0.725	1	0.951	1	0.238	1	0.991	1	0.909	1	bradykinin receptor activity	F
GO:0004949	50	0.996	1	0.873	1	1	1	0.943	1	0.945	1	0.822	1	0.966	1	0.732	1	cannabinoid receptor activity	F
GO:0004950	58	1	1	1	1	0.997	1	0.949	1	0.999	1	1	1	1	1	1	1	chemokine receptor activity	F
GO:0004952	73	0.118	1	0.511	1	0.0168	0.693	0.747	1	0.36	1	0.709	1	0.285	1	0.0104	0.481	dopamine receptor activity	F
GO:0004953	17	0.707	1	0.933	1	0.182	1	1	1	0.795	1	0.732	1	0.999	1	0.723	1	icosanoid receptor activity	F
GO:0004954	17	0.707	1	0.933	1	0.182	1	1	1	0.795	1	0.732	1	0.999	1	0.723	1	prostanoid receptor activity	F
GO:0004955	17	0.707	1	0.933	1	0.182	1	1	1	0.795	1	0.732	1	0.999	1	0.723	1	prostaglandin receptor activity	F
GO:0004957	13	0.827	1	0.837	1	0.209	1	1	1	0.959	1	0.608	1	0.986	1	0.661	1	prostaglandin E receptor activity	F
GO:0004965	24	0.938	1	0.928	1	0.992	1	0.948	1	0.91	1	0.843	1	0.474	1	0.798	1	GABA-B receptor activity	F
GO:0004966	43	0.411	1	0.616	1	0.47	1	0.339	1	0.551	1	0.594	1	0.119	1	0.874	1	galanin receptor activity	F
GO:0004969	58	0.0046	0.328	0.00541	0.36	0.0303	1	0.0184	1	0.0118	0.539	0.0152	0.739	0.128	1	0.0221	1	histamine receptor activity	F
GO:0004970	18	0.991	1	0.999	1	0.958	1	0.998	1	0.978	1	0.96	1	0.84	1	1	1	ionotropic glutamate receptor activity	F
GO:0004974	26	0.964	1	0.828	1	0.991	1	0.812	1	0.918	1	0.727	1	0.946	1	0.984	1	leukotriene receptor activity	F
GO:0004977	188	1	1	1	1	1	1	1	1	1	1	1	1	1	1	1	1	melanocortin receptor activity	F
GO:0004981	21	0.741	1	1	1	0.822	1	0.991	1	0.722	1	1	1	0.331	1	0.956	1	muscarinic acetylcholine receptor activity	F
GO:0004982	28	0.757	1	0.266	1	0.988	1	0.291	1	0.491	1	0.229	1	0.838	1	0.568	1	N-formyl peptide receptor activity	F
GO:0004983	90	0.999	1	1	1	0.989	1	1	1	0.999	1	1	1	0.81	1	0.995	1	neuropeptide Y receptor activity	F
GO:0004984	455	1	1	1	1	1	1	1	1	1	1	1	1	1	1	1	1	olfactory receptor activity	F
GO:0004985	17	0.452	1	0.992	1	0.51	1	0.993	1	0.512	1	0.981	1	0.261	1	0.743	1	opioid receptor activity	F
GO:0004992	19	0.995	1	0.745	1	0.997	1	0.993	1	0.97	1	0.544	1	0.957	1	0.748	1	platelet activating factor receptor activity	F
GO:0004993	13	0.61	1	0.881	1	0.546	1	0.735	1	0.416	1	0.915	1	0.988	1	0.722	1	serotonin receptor activity	F
GO:0004994	23	0.89	1	0.734	1	0.667	1	0.822	1	0.844	1	0.592	1	0.974	1	0.717	1	somatostatin receptor activity	F
GO:0005000	13	0.669	1	0.565	1	0.324	1	0.463	1	0.601	1	0.508	1	0.997	1	0.986	1	vasopressin receptor activity	F
GO:0005001	18	0.84	1	0.668	1	0.596	1	0.622	1	0.922	1	0.665	1	0.606	1	0.601	1	transmembrane receptor protein tyrosine phosphatase activity	F
GO:0005003	17	0.927	1	0.806	1	0.769	1	0.924	1	0.866	1	0.864	1	0.961	1	0.334	1	ephrin receptor activity	F
GO:0005021	71	1	1	0.998	1	1	1	1	1	1	1	0.994	1	0.826	1	0.683	1	vascular endothelial growth factor receptor activity	F
GO:0005024	15	0.819	1	0.438	1	0.994	1	0.279	1	0.668	1	0.639	1	0.546	1	0.181	1	transforming growth factor beta receptor activity	F
GO:0005035	10	0.665	1	0.636	1	0.0988	1	0.737	1	0.975	1	0.623	1	0.374	1	0.269	1	death receptor activity	F
GO:0005041	12	0.257	1	0.0999	1	0.94	1	0.604	1	0.159	1	0.0355	1	0.15	1	0.177	1	low-density lipoprotein receptor activity	F
GO:0005044	42	0.963	1	0.988	1	0.857	1	0.861	1	0.887	1	0.954	1	0.993	1	0.993	1	scavenger receptor activity	F
GO:0005048	20	0.149	1	0.0457	1	0.129	1	0.0941	1	0.135	1	0.0656	1	0.451	1	0.204	1	signal sequence binding	F
GO:0005057	168	0.0463	1	0.00615	0.36	0.212	1	0.00471	0.346	0.0169	1	0.0164	0.86	0.336	1	0.074	1	receptor signaling protein activity	F
GO:0005066	11	0.476	1	0.905	1	0.298	1	0.645	1	0.516	1	0.974	1	0.697	1	0.599	1	transmembrane receptor protein tyrosine kinase signaling protein activity	F
GO:0005070	47	0.0599	1	0.0408	1	0.268	1	0.0151	0.818	0.0555	1	0.0692	1	0.157	1	0.331	1	SH3/SH2 adaptor activity	F
GO:0005080	10	0.452	1	0.136	1	0.496	1	0.508	1	0.18	1	0.0306	1	1	1	0.77	1	protein kinase C binding	F
GO:0005083	257	0.00141	0.202	0.000232	0.0419	0.000719	0.045	0.0123	0.818	0.00587	0.539	0.00411	0.27	0.274	1	0.0035	0.185	small GTPase regulator activity	F
GO:0005085	150	0.0991	1	0.0262	1	0.019	1	0.0526	1	0.11	1	0.0341	1	0.989	1	0.282	1	guanyl-nucleotide exchange factor activity	F
GO:0005086	17	0.117	1	0.291	1	0.0945	1	0.099	1	0.186	1	0.354	1	0.841	1	0.947	1	ARF guanyl-nucleotide exchange factor activity	F
GO:0005088	89	0.67	1	0.115	1	0.452	1	0.486	1	0.513	1	0.101	1	0.999	1	0.149	1	Ras guanyl-nucleotide exchange factor activity	F
GO:0005089	77	0.761	1	0.226	1	0.372	1	0.625	1	0.659	1	0.17	1	0.998	1	0.229	1	Rho guanyl-nucleotide exchange factor activity	F
GO:0005095	10	0.00675	0.517	0.000117	0.015	0.286	1	0.096	1	0.00796	0.539	0.00485	0.27	0.0841	1	0.0354	1	GTPase inhibitor activity	F
GO:0005096	251	0.0111	0.667	0.000482	0.069	0.00982	0.46	0.013	0.818	0.0335	1	0.00415	0.27	0.243	1	0.0133	0.647	GTPase activator activity	F
GO:0005097	56	0.137	1	0.0841	1	0.25	1	0.504	1	0.243	1	0.126	1	0.0574	1	0.107	1	Rab GTPase activator activity	F
GO:0005099	94	0.0498	1	0.00381	0.197	0.0633	1	0.0405	1	0.151	1	0.0531	1	0.0348	1	0.0089	0.481	Ras GTPase activator activity	F
GO:0005100	25	0.135	1	0.034	1	0.0333	1	0.0203	1	0.315	1	0.179	1	0.505	1	0.064	1	Rho GTPase activator activity	F
GO:0005102	905	0.42	1	0.368	1	0.484	1	0.327	1	0.37	1	0.33	1	0.43	1	0.677	1	receptor binding	F
GO:0005104	10	1	1	1	1	1	1	1	1	1	1	1	1	0.858	1	0.999	1	fibroblast growth factor receptor binding	F
GO:0005125	258	0.985	1	0.997	1	0.884	1	0.872	1	0.983	1	0.998	1	0.884	1	0.971	1	cytokine activity	F
GO:0005126	47	1	1	1	1	0.958	1	0.981	1	1	1	1	1	0.654	1	1	1	hematopoietin/interferon-class (D200-domain) cytokine receptor binding	F
GO:0005149	16	1	1	0.997	1	0.984	1	0.987	1	1	1	0.979	1	0.936	1	1	1	interleukin-1 receptor binding	F
GO:0005154	11	0.863	1	0.806	1	0.281	1	0.41	1	0.952	1	0.981	1	0.997	1	0.153	1	epidermal growth factor receptor binding	F
GO:0005158	23	0.953	1	0.998	1	0.545	1	0.825	1	0.986	1	1	1	0.915	1	0.94	1	insulin receptor binding	F
GO:0005159	13	0.559	1	0.705	1	0.49	1	0.224	1	0.625	1	0.868	1	0.398	1	0.867	1	insulin-like growth factor receptor binding	F
GO:0005160	12	0.332	1	0.37	1	0.222	1	0.165	1	0.322	1	0.322	1	0.809	1	0.992	1	transforming growth factor beta receptor binding	F
GO:0005164	35	0.0826	1	0.22	1	0.142	1	0.568	1	0.0592	1	0.233	1	0.56	1	0.115	1	tumor necrosis factor receptor binding	F
GO:0005178	49	0.539	1	0.484	1	0.153	1	0.361	1	0.726	1	0.532	1	0.567	1	0.664	1	integrin binding	F
GO:0005179	175	0.0953	1	0.308	1	0.561	1	0.548	1	0.119	1	0.163	1	0.0112	0.63	0.64	1	hormone activity	F
GO:0005184	29	0.471	1	0.402	1	0.902	1	0.0957	1	0.627	1	0.651	1	0.068	1	0.226	1	neuropeptide hormone activity	F
GO:0005198	973	0.000168	0.025	0.00342	0.197	0.0108	0.532	0.199	1	0.000196	0.017	0.000928	0.0549	0.0137	0.647	0.0482	1	structural molecule activity	F
GO:0005199	77	0.0299	1	0.021	1	0.302	1	0.0122	0.818	0.0341	1	0.0395	1	0.0226	1	0.216	1	structural constituent of cell wall	F
GO:0005200	81	0.314	1	0.0779	1	0.0343	1	0.247	1	0.623	1	0.0298	1	0.782	1	0.738	1	structural constituent of cytoskeleton	F
GO:0005201	100	0.997	1	1	1	0.997	1	0.994	1	0.965	1	0.999	1	1	1	0.975	1	extracellular matrix structural constituent	F
GO:0005212	17	0.134	1	0.149	1	0.00964	0.46	0.0849	1	0.521	1	0.251	1	0.248	1	0.139	1	structural constituent of eye lens	F
GO:0005215	1546	3.79e-05	0.01	2.61e-05	0.00958	0.0291	1	0.00866	0.713	6.41e-06	0.00288	2.72e-06	0.00297	0.184	1	0.326	1	transporter activity	F
GO:0005216	496	0.281	1	0.486	1	0.272	1	0.473	1	0.287	1	0.419	1	0.496	1	0.558	1	ion channel activity	F
GO:0005217	14	0.924	1	0.857	1	0.613	1	0.826	1	0.892	1	0.638	1	1	1	0.993	1	intracellular ligand-gated ion channel activity	F
GO:0005230	74	0.862	1	0.933	1	0.888	1	0.686	1	0.68	1	0.894	1	0.98	1	0.971	1	extracellular ligand-gated ion channel activity	F
GO:0005231	48	0.773	1	0.538	1	0.529	1	0.231	1	0.624	1	0.589	1	0.995	1	0.625	1	excitatory extracellular ligand-gated ion channel activity	F
GO:0005234	19	0.89	1	0.968	1	0.787	1	0.989	1	0.858	1	0.808	1	0.812	1	0.999	1	glutamate-gated ion channel activity	F
GO:0005242	23	0.985	1	0.808	1	0.949	1	0.723	1	0.985	1	0.813	1	0.536	1	0.616	1	inward rectifier potassium channel activity	F
GO:0005244	311	0.344	1	0.59	1	0.511	1	0.641	1	0.357	1	0.567	1	0.264	1	0.48	1	voltage-gated ion channel activity	F
GO:0005245	50	0.207	1	0.186	1	0.676	1	0.186	1	0.159	1	0.28	1	0.275	1	0.31	1	voltage-gated calcium channel activity	F
GO:0005246	15	0.665	1	0.457	1	0.974	1	0.437	1	0.574	1	0.361	1	0.273	1	0.673	1	calcium channel regulator activity	F
GO:0005247	27	0.36	1	0.0888	1	0.713	1	0.142	1	0.203	1	0.0919	1	0.423	1	0.655	1	voltage-gated chloride channel activity	F
GO:0005248	17	0.997	1	1	1	0.992	1	0.933	1	0.982	1	1	1	0.993	1	1	1	voltage-gated sodium channel activity	F
GO:0005249	225	0.577	1	0.808	1	0.303	1	0.806	1	0.753	1	0.812	1	0.343	1	0.463	1	voltage-gated potassium channel activity	F
GO:0005251	12	1	1	1	1	0.995	1	0.995	1	1	1	1	1	0.832	1	0.983	1	delayed rectifier potassium channel activity	F
GO:0005253	79	0.66	1	0.801	1	0.551	1	0.451	1	0.581	1	0.741	1	0.873	1	0.984	1	anion channel activity	F
GO:0005254	72	0.856	1	0.953	1	0.826	1	0.78	1	0.767	1	0.898	1	0.861	1	0.993	1	chloride channel activity	F
GO:0005261	374	0.332	1	0.39	1	0.2	1	0.533	1	0.394	1	0.336	1	0.527	1	0.357	1	cation channel activity	F
GO:0005262	98	0.4	1	0.0869	1	0.758	1	0.382	1	0.355	1	0.0524	1	0.258	1	0.365	1	calcium channel activity	F
GO:0005267	244	0.656	1	0.876	1	0.495	1	0.893	1	0.738	1	0.86	1	0.469	1	0.494	1	potassium channel activity	F
GO:0005272	34	0.914	1	0.999	1	0.419	1	0.732	1	0.985	1	0.999	1	0.693	1	0.998	1	sodium channel activity	F
GO:0005275	69	0.981	1	0.25	1	0.709	1	0.35	1	0.986	1	0.219	1	0.985	1	0.56	1	amine transporter activity	F
GO:0005279	21	1	1	0.823	1	0.958	1	0.765	1	1	1	0.894	1	0.972	1	0.407	1	amino acid-polyamine transporter activity	F
GO:0005283	15	1	1	0.618	1	0.931	1	0.56	1	1	1	0.802	1	0.964	1	0.252	1	sodium:amino acid symporter activity	F
GO:0005310	64	0.708	1	0.865	1	0.985	1	0.785	1	0.622	1	0.827	1	0.252	1	0.945	1	dicarboxylic acid transporter activity	F
GO:0005313	10	0.957	1	0.415	1	0.789	1	0.33	1	0.948	1	0.463	1	0.795	1	0.649	1	L-glutamate transporter activity	F
GO:0005319	79	0.0284	1	0.0482	1	0.134	1	0.0817	1	0.0327	1	0.0409	1	0.0692	1	0.49	1	lipid transporter activity	F
GO:0005326	28	1	1	1	1	0.999	1	0.991	1	1	1	1	1	0.987	1	0.779	1	neurotransmitter transporter activity	F
GO:0005328	25	1	1	1	1	0.995	1	0.98	1	1	1	1	1	0.987	1	0.752	1	neurotransmitter:sodium symporter activity	F
GO:0005337	18	0.0189	1	0.00592	0.36	0.004	0.327	0.357	1	0.0432	1	0.000963	0.0549	0.251	1	0.637	1	nucleoside transporter activity	F
GO:0005342	130	0.735	1	0.751	1	0.969	1	0.902	1	0.615	1	0.533	1	0.478	1	0.925	1	organic acid transporter activity	F
GO:0005343	80	0.887	1	0.899	1	0.966	1	0.835	1	0.899	1	0.889	1	0.578	1	0.793	1	organic acid:sodium symporter activity	F
GO:0005344	15	0.216	1	1	1	0.925	1	1	1	0.144	1	1	1	0.0577	1	0.347	1	oxygen transporter activity	F
GO:0005351	44	0.0635	1	0.0171	1	0.197	1	0.0307	1	0.0826	1	0.0479	1	0.135	1	0.237	1	sugar porter activity	F
GO:0005355	15	0.0853	1	0.0387	1	0.107	1	0.213	1	0.131	1	0.057	1	0.12	1	0.292	1	glucose transporter activity	F
GO:0005372	11	0.937	1	0.308	1	0.587	1	0.544	1	0.874	1	0.22	1	1	1	0.593	1	water transporter activity	F
GO:0005375	11	0.492	1	0.0716	1	1	1	0.0888	1	0.351	1	0.117	1	0.851	1	0.498	1	copper ion transporter activity	F
GO:0005385	12	0.0151	0.667	0.0462	1	0.672	1	0.562	1	0.00962	0.539	0.00769	0.53	0.561	1	0.472	1	zinc ion transporter activity	F
GO:0005386	409	0.49	1	0.147	1	0.939	1	0.551	1	0.218	1	0.0734	1	0.836	1	0.51	1	carrier activity	F
GO:0005391	10	0.546	1	0.624	1	0.339	1	1	1	0.433	1	0.529	1	0.993	1	0.203	1	sodium:potassium-exchanging ATPase activity	F
GO:0005416	18	1	1	0.746	1	0.94	1	0.742	1	1	1	0.835	1	0.973	1	0.307	1	cation:amino acid symporter activity	F
GO:0005451	14	0.96	1	0.871	1	0.999	1	0.467	1	0.701	1	0.865	1	1	1	0.999	1	monovalent cation:proton antiporter activity	F
GO:0005452	20	0.509	1	0.304	1	0.241	1	0.429	1	0.577	1	0.32	1	0.681	1	0.589	1	inorganic anion exchanger activity	F
GO:0005478	29	0.0225	1	0.000394	0.069	0.0322	1	0.0029	0.147	0.0421	1	0.000747	0.0549	0.474	1	0.094	1	intracellular transporter activity	F
GO:0005484	20	0.0835	1	0.0415	1	0.0799	1	0.035	1	0.118	1	0.06	1	0.423	1	0.296	1	SNAP receptor activity	F
GO:0005488	13036	0	0	0	0	2.65e-41	0	0	0	0	0	0	0	3.93e-24	0	8.95e-33	0	binding	F
GO:0005496	80	0.592	1	0.889	1	0.111	1	0.733	1	0.694	1	0.799	1	0.888	1	0.979	1	steroid binding	F
GO:0005501	17	0.812	1	0.688	1	0.878	1	0.809	1	0.859	1	0.544	1	0.225	1	0.591	1	retinoid binding	F
GO:0005504	26	0.0715	1	0.0806	1	0.286	1	0.245	1	0.0917	1	0.15	1	0.0355	1	0.0688	1	fatty acid binding	F
GO:0005506	322	0.475	1	0.0992	1	0.563	1	0.749	1	0.352	1	0.0144	0.739	0.692	1	0.752	1	iron ion binding	F
GO:0005507	81	0.988	1	0.724	1	0.991	1	0.587	1	0.968	1	0.737	1	0.804	1	0.689	1	copper ion binding	F
GO:0005509	1057	1	1	0.703	1	0.945	1	0.669	1	1	1	0.499	1	0.999	1	0.921	1	calcium ion binding	F
GO:0005515	7540	0	0	0	0	6.21e-37	0	5.61e-45	0	0	0	0	0	2.87e-15	0	3.81e-30	0	protein binding	F
GO:0005516	147	0.255	1	0.0274	1	0.0721	1	0.207	1	0.26	1	0.00705	0.53	0.976	1	0.673	1	calmodulin binding	F
GO:0005518	18	0.405	1	0.545	1	0.738	1	0.566	1	0.367	1	0.54	1	0.431	1	0.353	1	collagen binding	F
GO:0005520	25	0.602	1	0.975	1	0.267	1	0.345	1	0.752	1	1	1	0.511	1	0.705	1	insulin-like growth factor binding	F
GO:0005523	13	0.15	1	0.396	1	0.185	1	0.41	1	0.179	1	0.198	1	0.644	1	0.998	1	tropomyosin binding	F
GO:0005524	1567	5.96e-25	0	1.78e-35	0	1.18e-15	0	7.49e-18	0	2.91e-21	0	6e-32	0	3.16e-06	0.00195	4.52e-09	0.000771	ATP binding	F
GO:0005525	404	4.5e-08	0.00184	5.28e-07	0.00839	0.000677	0.045	0.0125	0.818	1.34e-07	0.00169	1.36e-07	0.00092	1.54e-05	0.00544	0.0123	0.647	GTP binding	F
GO:0005529	204	0.987	1	0.305	1	0.965	1	0.654	1	0.987	1	0.195	1	0.613	1	0.378	1	sugar binding	F
GO:0005537	13	0.818	1	0.404	1	0.638	1	0.477	1	0.935	1	0.357	1	0.23	1	0.457	1	mannose binding	F
GO:0005539	105	0.874	1	0.948	1	0.382	1	0.928	1	0.907	1	0.858	1	0.904	1	0.938	1	glycosaminoglycan binding	F
GO:0005540	17	0.729	1	0.765	1	0.588	1	0.836	1	0.786	1	0.639	1	0.66	1	0.845	1	hyaluronic acid binding	F
GO:0005542	13	0.192	1	0.115	1	0.136	1	0.705	1	0.234	1	0.0599	1	0.584	1	0.318	1	folic acid binding	F
GO:0005543	147	0.00038	0.0337	1.06e-06	0.00839	0.0164	0.693	0.000236	0.027	0.00208	0.285	2.9e-06	0.00297	0.0154	0.647	0.013	0.647	phospholipid binding	F
GO:0005544	24	0.413	1	0.376	1	0.916	1	0.158	1	0.425	1	0.58	1	0.133	1	0.414	1	calcium-dependent phospholipid binding	F
GO:0005545	16	0.187	1	0.113	1	0.406	1	0.128	1	0.197	1	0.148	1	0.256	1	0.482	1	phosphatidylinositol binding	F
GO:0005548	30	0.106	1	0.244	1	0.32	1	0.482	1	0.105	1	0.2	1	0.254	1	0.559	1	phospholipid transporter activity	F
GO:0005575	16286	0	0	0	0	9.69e-29	0	3.35e-30	0	0	0	0	0	3.63e-19	0	5.77e-28	0	cellular_component	C
GO:0005576	2040	1	1	1	1	1	1	1	1	1	1	1	1	0.999	1	1	1	extracellular region	C
GO:0005578	344	1	1	0.997	1	0.972	1	0.993	1	1	1	0.969	1	0.994	1	1	1	extracellular matrix (sensu Metazoa)	C
GO:0005581	35	1	1	1	1	0.997	1	0.999	1	1	1	1	1	0.979	1	1	1	collagen	C
GO:0005604	75	1	1	0.917	1	0.997	1	0.999	1	1	1	0.786	1	0.988	1	0.694	1	basement membrane	C
GO:0005605	30	0.979	1	0.59	1	0.991	1	0.953	1	0.897	1	0.391	1	0.904	1	0.421	1	basal lamina	C
GO:0005615	516	0.945	1	0.963	1	0.739	1	0.942	1	0.966	1	0.852	1	0.526	1	0.999	1	extracellular space	C
GO:0005622	10868	0	0	0	0	0	0	0	0	0	0	0	0	7.1e-39	0	0	0	intracellular	C
GO:0005623	14957	0	0	0	0	1.1e-35	0	1.65e-36	0	0	0	0	0	2.18e-22	0	2.6e-32	0	cell	C
GO:0005624	653	0.0879	1	0.0156	1	0.289	1	0.241	1	0.0796	1	0.00412	0.27	0.201	1	0.503	1	membrane fraction	C
GO:0005625	222	0.00261	0.239	0.00305	0.197	0.0702	1	0.0315	1	0.00292	0.285	0.00929	0.739	0.0183	0.911	0.0374	1	soluble fraction	C
GO:0005626	23	0.543	1	0.349	1	0.27	1	0.288	1	0.732	1	0.469	1	0.301	1	0.143	1	insoluble fraction	C
GO:0005634	4933	0	0	0	0	9.13e-33	0	1.49e-40	0	0	0	0	0	1.18e-24	0	1.72e-33	0	nucleus	C
GO:0005635	194	1.01e-08	0.000806	1.68e-10	0	3.5e-05	0.006	7.84e-05	0.012	7.53e-08	0.00169	4.43e-09	0.000837	0.0125	0.63	4.78e-05	0.009	nuclear envelope	C
GO:0005637	19	0.0251	1	0.0304	1	0.201	1	0.529	1	0.0501	1	0.0158	0.763	0.332	1	0.275	1	nuclear inner membrane	C
GO:0005640	15	0.441	1	0.0822	1	0.2	1	0.267	1	0.315	1	0.0402	1	1	1	0.437	1	nuclear outer membrane	C
GO:0005643	69	2.51e-08	0.000977	3.9e-14	0	0.00234	0.248	5.17e-07	0.00196	2.35e-08	0.000964	2.72e-12	0	0.00271	0.195	0.000317	0.027	nuclear pore	C
GO:0005654	739	2.08e-26	0	1.57e-23	0	2.53e-13	0	9.91e-13	0	8.45e-26	0	5.29e-21	0	3.48e-06	0.00195	1.46e-05	0.009	nucleoplasm	C
GO:0005657	33	6.35e-05	0.011	5.95e-06	0.00839	0.00816	0.46	0.00459	0.346	3.88e-05	0.005	4.19e-06	0.00297	0.132	1	0.18	1	replication fork	C
GO:0005665	14	0.209	1	0.0486	1	0.466	1	0.0517	1	0.374	1	0.0482	1	0.0333	1	0.866	1	DNA-directed RNA polymerase II, core complex	C
GO:0005667	224	0.000165	0.025	0.000467	0.069	0.00474	0.327	0.00402	0.241	0.000136	0.017	0.00135	0.064	0.195	1	0.128	1	transcription factor complex	C
GO:0005669	25	0.00162	0.202	0.00483	0.36	0.00701	0.46	0.125	1	0.00149	0.176	0.0129	0.739	0.341	1	0.0811	1	transcription factor TFIID complex	C
GO:0005680	12	0.0582	1	0.036	1	0.155	1	0.0766	1	0.364	1	0.0686	1	0.000442	0.065	0.0731	1	anaphase-promoting complex	C
GO:0005681	132	1.34e-11	0	2.8e-09	0.00497	1.81e-06	0.00242	0.00191	0.124	9.62e-10	0.000964	1.19e-08	0.000837	0.000332	0.034	0.000141	0.02	spliceosome complex	C
GO:0005684	10	0.000683	0.0344	0.00204	0.129	0.00376	0.327	0.01	0.713	0.00541	0.418	0.00236	0.164	0.0532	1	0.514	1	major (U2-dependent) spliceosome	C
GO:0005689	11	0.000207	0.025	0.0325	1	0.0688	1	0.0804	1	0.000351	0.0198	0.0331	1	0.0434	1	0.434	1	minor (U12-dependent) spliceosome complex	C
GO:0005694	526	7.27e-12	0	2.84e-11	0	0.000439	0.036	0.00324	0.147	6.46e-12	0	1.73e-10	0	8.49e-05	0.025	2.7e-06	0.00188	chromosome	C
GO:0005720	24	0.194	1	0.503	1	0.546	1	0.805	1	0.192	1	0.463	1	0.214	1	0.349	1	nuclear heterochromatin	C
GO:0005730	177	2.61e-10	0	1.36e-08	0.00497	1.38e-05	0.00372	0.00102	0.083	1.02e-08	0.000964	3.58e-07	0.00297	0.00121	0.168	0.000949	0.0916	nucleolus	C
GO:0005732	15	0.352	1	0.137	1	0.244	1	0.71	1	0.346	1	0.223	1	0.53	1	0.0404	1	small nucleolar ribonucleoprotein complex	C
GO:0005737	6696	0	0	0	0	4.24e-42	0	0	0	0	0	0	0	1.27e-21	0	1.17e-26	0	cytoplasm	C
GO:0005739	966	2.68e-24	0	1.46e-20	0	1.55e-15	0	1.29e-10	0	2.05e-20	0	6.68e-19	0	7.05e-06	0.002	5.39e-05	0.009	mitochondrion	C
GO:0005740	395	5.89e-16	0	2.55e-10	0	3.47e-08	0.000968	6.36e-06	0.008	2.87e-15	0	2.16e-09	0	0.0019	0.195	0.00209	0.14	mitochondrial envelope	C
GO:0005741	76	0.000288	0.0337	4.96e-05	0.00958	0.0106	0.532	0.00344	0.202	0.000202	0.017	0.000385	0.0307	0.124	1	0.00277	0.185	mitochondrial outer membrane	C
GO:0005743	285	1.1e-14	0	6.25e-07	0.00839	1.47e-06	0.00242	0.000424	0.042	8.11e-15	0	7.19e-07	0.00297	0.00816	0.63	0.0645	1	mitochondrial inner membrane	C
GO:0005744	12	0.00211	0.202	0.0566	1	0.181	1	0.129	1	0.00069	0.04	0.0396	1	0.153	1	0.485	1	mitochondrial inner membrane presequence translocase complex	C
GO:0005746	63	1.89e-05	0.008	0.000614	0.069	0.00345	0.327	0.023	1	3.39e-05	0.005	0.00126	0.064	0.0575	1	0.0578	1	mitochondrial electron transport chain	C
GO:0005747	36	0.000228	0.0264	0.00699	0.36	0.038	1	0.0332	1	0.000672	0.04	0.0296	1	0.0327	1	0.0508	1	respiratory chain complex I (sensu Eukaryota)	C
GO:0005753	16	0.00452	0.328	0.144	1	0.00776	0.46	0.141	1	0.00388	0.285	0.185	1	0.175	1	0.249	1	proton-transporting ATP synthase complex (sensu Eukaryota)	C
GO:0005758	29	0.192	1	0.381	1	0.708	1	0.49	1	0.0684	1	0.262	1	0.412	1	0.879	1	mitochondrial intermembrane space	C
GO:0005759	196	0.000141	0.025	0.00452	0.36	0.000206	0.024	0.00556	0.346	0.00262	0.285	0.01	0.739	0.0197	0.911	0.385	1	mitochondrial matrix	C
GO:0005761	48	0.013	0.667	0.119	1	0.00322	0.248	0.136	1	0.257	1	0.233	1	0.00261	0.195	0.271	1	mitochondrial ribosome	C
GO:0005762	17	0.474	1	0.157	1	0.542	1	0.0342	1	0.584	1	0.213	1	0.132	1	0.397	1	mitochondrial large ribosomal subunit	C
GO:0005763	18	0.038	1	0.241	1	0.0118	0.532	0.421	1	0.164	1	0.256	1	0.123	1	0.515	1	mitochondrial small ribosomal subunit	C
GO:0005764	209	0.0011	0.096	0.00111	0.091	0.195	1	0.0373	1	0.000275	0.017	0.00442	0.27	0.149	1	0.00398	0.185	lysosome	C
GO:0005765	57	0.00126	0.202	0.0208	1	0.0399	1	0.109	1	0.00186	0.176	0.0855	1	0.413	1	0.0163	0.849	lysosomal membrane	C
GO:0005768	231	1.55e-06	0.00195	3.5e-05	0.00958	0.0159	0.693	0.0187	1	7.87e-06	0.00288	0.000112	0.017	0.000145	0.025	0.00477	0.36	endosome	C
GO:0005769	65	0.000136	0.025	3.54e-05	0.00958	0.0422	1	0.0182	1	0.000319	0.0198	0.000161	0.017	0.0872	1	0.0161	0.849	early endosome	C
GO:0005770	58	0.00161	0.202	0.00172	0.091	0.0861	1	0.0437	1	0.0025	0.285	0.0136	0.739	0.0279	1	0.0126	0.647	late endosome	C
GO:0005773	232	0.000134	0.025	0.000145	0.015	0.192	1	0.0194	1	3.32e-05	0.005	0.000485	0.041	0.0544	1	0.00342	0.185	vacuole	C
GO:0005774	68	0.00186	0.202	0.024	1	0.115	1	0.108	1	0.00294	0.285	0.0895	1	0.219	1	0.0194	1	vacuolar membrane	C
GO:0005776	10	0.00634	0.517	0.00112	0.091	0.0538	1	0.302	1	0.0109	0.539	0.00077	0.0549	0.106	1	0.319	1	autophagic vacuole	C
GO:0005777	98	0.000628	0.0344	0.0439	1	0.0223	1	0.0368	1	0.000784	0.0404	0.0426	1	0.0214	0.911	0.534	1	peroxisome	C
GO:0005778	42	0.0029	0.239	0.183	1	0.0491	1	0.168	1	0.00356	0.285	0.162	1	0.00425	0.357	0.458	1	peroxisomal membrane	C
GO:0005779	12	0.0428	1	0.411	1	0.0589	1	0.228	1	0.0879	1	0.388	1	0.125	1	0.914	1	integral to peroxisomal membrane	C
GO:0005783	856	8.86e-06	0.007	1.71e-08	0.00497	0.000323	0.036	0.000669	0.047	7.93e-05	0.017	1.29e-08	0.000837	0.00898	0.63	0.00573	0.36	endoplasmic reticulum	C
GO:0005788	65	0.0164	0.667	0.00247	0.177	0.0138	0.693	0.0644	1	0.0365	1	0.0016	0.161	0.347	1	0.182	1	endoplasmic reticulum lumen	C
GO:0005789	502	0.00296	0.239	0.000578	0.069	0.072	1	0.113	1	0.00527	0.418	0.000606	0.0549	0.0263	1	0.00606	0.36	endoplasmic reticulum membrane	C
GO:0005790	10	0.441	1	0.551	1	0.317	1	0.961	1	0.328	1	0.374	1	0.972	1	0.434	1	smooth endoplasmic reticulum	C
GO:0005791	17	0.219	1	0.0791	1	0.3	1	0.431	1	0.253	1	0.0775	1	0.104	1	0.0364	1	rough endoplasmic reticulum	C
GO:0005792	182	0.316	1	0.478	1	0.437	1	0.701	1	0.4	1	0.34	1	0.0834	1	0.693	1	microsome	C
GO:0005793	34	0.0912	1	0.00128	0.091	0.112	1	0.0121	0.818	0.0945	1	0.00157	0.161	0.484	1	0.26	1	ER-Golgi intermediate compartment	C
GO:0005794	691	9.26e-08	0.00185	3.4e-10	0	1.82e-06	0.00242	3.39e-05	0.008	2.99e-06	0.0026	2.68e-10	0	0.0129	0.63	0.0497	1	Golgi apparatus	C
GO:0005795	21	0.295	1	0.0538	1	0.0773	1	0.123	1	0.435	1	0.0489	1	0.778	1	0.648	1	Golgi stack	C
GO:0005798	54	0.0005	0.0337	0.00189	0.129	0.0202	1	0.113	1	0.000477	0.022	0.00361	0.27	0.0328	1	0.0437	1	Golgi-associated vesicle	C
GO:0005801	14	0.000184	0.025	0.000908	0.069	0.0961	1	0.00247	0.147	0.00313	0.285	0.00465	0.27	0.398	1	0.133	1	Golgi cis face	C
GO:0005802	28	0.0505	1	0.0558	1	0.146	1	0.107	1	0.0851	1	0.0356	1	0.0645	1	0.825	1	Golgi trans face	C
GO:0005811	13	0.00763	0.634	0.0984	1	0.0506	1	0.0555	1	0.0209	1	0.124	1	0.0334	1	0.504	1	lipid particle	C
GO:0005813	143	0.000731	0.0671	0.00507	0.36	0.00344	0.327	0.00447	0.346	0.00375	0.285	0.0252	1	0.0437	1	0.0377	1	centrosome	C
GO:0005814	10	0.0473	1	0.104	1	0.162	1	0.0464	1	0.0262	1	0.156	1	0.576	1	0.626	1	centriole	C
GO:0005815	162	0.00127	0.202	0.00466	0.36	0.00745	0.46	0.00494	0.346	0.00899	0.539	0.0155	0.763	0.0175	0.911	0.086	1	microtubule organizing center	C
GO:0005819	90	3.6e-05	0.01	0.000637	0.069	0.000445	0.036	0.0529	1	0.000405	0.022	0.000526	0.041	0.0415	1	0.0354	1	spindle	C
GO:0005829	959	5.48e-30	0	1.4e-30	0	7.86e-12	0	4.44e-14	0	1.47e-28	0	1.83e-26	0	1.12e-11	0	8.14e-13	0	cytosol	C
GO:0005833	14	0.156	1	0.988	1	0.904	1	1	1	0.065	1	0.97	1	0.0926	1	0.364	1	hemoglobin complex	C
GO:0005834	29	0.265	1	0.592	1	0.544	1	0.387	1	0.316	1	0.447	1	0.106	1	0.918	1	heterotrimeric G-protein complex	C
GO:0005839	21	0.177	1	0.0228	1	0.621	1	0.0647	1	0.199	1	0.0404	1	0.0418	1	0.033	1	proteasome core complex (sensu Eukaryota)	C
GO:0005840	327	6.57e-12	0	9.59e-06	0.00958	2.95e-06	0.00242	0.0222	1	6.48e-10	0	2.25e-05	0.00763	9.6e-06	0.00544	0.00293	0.185	ribosome	C
GO:0005844	12	0.148	1	0.115	1	0.0489	1	0.0826	1	0.322	1	0.0856	1	0.309	1	0.596	1	polysome	C
GO:0005852	12	7.58e-05	0.0124	0.0101	0.518	0.00738	0.46	0.579	1	2.8e-05	0.005	0.00666	0.53	0.0193	0.911	0.305	1	eukaryotic translation initiation factor 3 complex	C
GO:0005856	1227	0.000394	0.0337	3.87e-05	0.00958	0.006	0.46	0.0239	1	0.000143	0.017	8.83e-06	0.00488	0.434	1	0.0426	1	cytoskeleton	C
GO:0005858	13	0.359	1	0.971	1	0.148	1	0.736	1	0.532	1	0.772	1	0.519	1	0.981	1	axonemal dynein complex	C
GO:0005863	18	0.989	1	0.465	1	0.933	1	0.336	1	0.951	1	0.344	1	0.987	1	0.936	1	striated muscle thick filament	C
GO:0005865	13	0.0413	1	0.109	1	0.0229	1	0.538	1	0.102	1	0.0326	1	0.424	1	0.465	1	striated muscle thin filament	C
GO:0005871	18	0.0363	1	0.0497	1	0.00578	0.46	0.062	1	0.0415	1	0.0629	1	0.563	1	0.247	1	kinesin complex	C
GO:0005874	247	1.51e-07	0.00185	2.68e-06	0.00839	4.77e-05	0.012	0.00292	0.147	1.06e-06	0.0026	8.42e-06	0.00488	0.00613	0.357	0.0047	0.36	microtubule	C
GO:0005875	117	0.0006	0.0337	0.00105	0.091	7.04e-05	0.012	0.000188	0.027	0.00364	0.285	0.00684	0.53	0.201	1	0.258	1	microtubule associated complex	C
GO:0005876	19	0.00184	0.202	0.0272	1	0.0331	1	0.19	1	0.001	0.044	0.0554	1	0.177	1	0.0435	1	spindle microtubule	C
GO:0005882	182	1	1	1	1	1	1	1	1	1	1	1	1	1	1	0.999	1	intermediate filament	C
GO:0005884	30	0.0166	0.667	0.0312	1	0.000985	0.098	0.00685	0.453	0.0602	1	0.155	1	0.379	1	0.503	1	actin filament	C
GO:0005886	3358	1	1	1	1	1	1	1	1	1	1	0.989	1	1	1	1	1	plasma membrane	C
GO:0005887	1228	0.998	1	0.942	1	0.988	1	0.996	1	0.976	1	0.745	1	0.999	1	0.855	1	integral to plasma membrane	C
GO:0005891	32	0.981	1	0.998	1	0.929	1	0.648	1	0.977	1	1	1	0.803	1	0.9	1	voltage-gated calcium channel complex	C
GO:0005892	14	0.63	1	0.416	1	0.627	1	0.237	1	0.444	1	0.628	1	0.974	1	0.166	1	nicotinic acetylcholine-gated receptor-channel complex	C
GO:0005901	34	0.125	1	0.538	1	0.031	1	0.581	1	0.298	1	0.678	1	0.0886	1	0.27	1	caveola	C
GO:0005902	17	0.886	1	0.438	1	0.359	1	0.688	1	0.981	1	0.326	1	0.543	1	0.643	1	microvillus	C
GO:0005903	27	0.825	1	0.316	1	0.403	1	0.947	1	0.941	1	0.259	1	0.345	1	0.207	1	brush border	C
GO:0005905	38	0.00173	0.202	0.00013	0.015	0.00886	0.46	0.0456	1	0.00252	0.285	3.67e-05	0.012	0.0401	1	0.386	1	coated pit	C
GO:0005911	176	0.0664	1	0.0253	1	0.0538	1	0.0154	0.818	0.029	1	0.0458	1	0.648	1	0.198	1	intercellular junction	C
GO:0005912	72	0.104	1	0.0534	1	0.0121	0.532	0.0109	0.818	0.177	1	0.0974	1	0.665	1	0.663	1	adherens junction	C
GO:0005913	26	0.242	1	0.0816	1	0.143	1	0.0461	1	0.416	1	0.169	1	0.147	1	0.217	1	cell-cell adherens junction	C
GO:0005921	30	0.744	1	0.41	1	0.673	1	0.167	1	0.703	1	0.496	1	0.594	1	0.46	1	gap junction	C
GO:0005922	24	0.598	1	0.543	1	0.736	1	0.283	1	0.541	1	0.575	1	0.366	1	0.662	1	connexon complex	C
GO:0005923	88	0.00178	0.202	0.00176	0.091	0.0158	0.693	0.00552	0.346	0.000277	0.017	0.00371	0.27	0.356	1	0.15	1	tight junction	C
GO:0005924	44	0.33	1	0.218	1	0.0133	0.553	0.0902	1	0.434	1	0.163	1	0.989	1	0.996	1	cell-substrate adherens junction	C
GO:0005925	40	0.412	1	0.252	1	0.0274	1	0.131	1	0.456	1	0.192	1	0.985	1	0.99	1	focal adhesion	C
GO:0005929	88	0.539	1	0.137	1	0.342	1	0.399	1	0.666	1	0.0497	1	0.425	1	0.696	1	cilium	C
GO:0005930	22	0.526	1	0.824	1	0.508	1	0.75	1	0.731	1	0.581	1	0.204	1	0.986	1	axoneme	C
GO:0005932	13	0.772	1	0.446	1	0.733	1	0.247	1	0.895	1	0.339	1	0.352	1	0.948	1	basal body	C
GO:0005938	82	8.8e-05	0.0124	5.84e-05	0.00958	0.000167	0.015	0.0124	0.818	0.00148	0.176	0.000373	0.0307	0.00314	0.195	0.0121	0.647	cell cortex	C
GO:0005941	52	0.847	1	0.293	1	0.936	1	0.565	1	0.804	1	0.27	1	0.717	1	0.283	1	unlocalized protein complex	C
GO:0005942	18	0.0461	1	0.1	1	0.0254	1	0.0333	1	0.104	1	0.209	1	0.0982	1	0.102	1	phosphoinositide 3-kinase complex	C
GO:0005952	23	0.972	1	0.992	1	0.908	1	0.983	1	0.983	1	0.929	1	0.754	1	0.998	1	cAMP-dependent protein kinase complex	C
GO:0005964	19	0.645	1	0.388	1	0.926	1	0.724	1	0.479	1	0.379	1	0.929	1	0.197	1	phosphorylase kinase complex	C
GO:0005975	560	0.00296	0.239	0.00254	0.177	0.0504	1	0.0557	1	0.00215	0.285	0.00421	0.27	0.241	1	0.0308	1	carbohydrate metabolism	P
GO:0005976	89	0.713	1	0.475	1	0.719	1	0.782	1	0.628	1	0.223	1	0.67	1	0.831	1	polysaccharide metabolism	P
GO:0005977	56	0.771	1	0.596	1	0.833	1	0.696	1	0.642	1	0.329	1	0.775	1	0.886	1	glycogen metabolism	P
GO:0005978	30	0.84	1	0.521	1	0.962	1	0.769	1	0.635	1	0.431	1	0.884	1	0.348	1	glycogen biosynthesis	P
GO:0005996	187	0.00014	0.025	0.00133	0.091	0.00281	0.248	0.0108	0.818	0.000213	0.017	0.0114	0.739	0.111	1	0.00396	0.185	monosaccharide metabolism	P
GO:0006000	13	0.606	1	0.606	1	0.908	1	0.357	1	0.558	1	0.787	1	0.346	1	0.229	1	fructose metabolism	P
GO:0006004	15	0.139	1	0.163	1	0.524	1	0.289	1	0.0811	1	0.19	1	0.3	1	0.0728	1	fucose metabolism	P
GO:0006006	134	5.58e-05	0.011	0.000794	0.069	0.000153	0.015	0.00867	0.713	0.000462	0.022	0.00808	0.739	0.0411	1	0.00558	0.36	glucose metabolism	P
GO:0006007	78	0.000378	0.0337	0.00208	0.129	4.07e-05	0.012	0.00524	0.346	0.00377	0.285	0.0114	0.739	0.179	1	0.0848	1	glucose catabolism	P
GO:0006022	47	0.626	1	0.364	1	0.412	1	0.244	1	0.649	1	0.584	1	0.712	1	0.169	1	aminoglycan metabolism	P
GO:0006023	21	0.769	1	0.258	1	0.19	1	0.0603	1	0.93	1	0.468	1	0.72	1	0.73	1	aminoglycan biosynthesis	P
GO:0006024	21	0.769	1	0.258	1	0.19	1	0.0603	1	0.93	1	0.468	1	0.72	1	0.73	1	glycosaminoglycan biosynthesis	P
GO:0006029	34	0.981	1	0.968	1	0.329	1	0.551	1	0.987	1	0.997	1	0.934	1	0.655	1	proteoglycan metabolism	P
GO:0006030	10	1	1	0.865	1	0.993	1	0.939	1	1	1	0.834	1	0.584	1	0.86	1	chitin metabolism	P
GO:0006040	33	0.854	1	0.212	1	0.793	1	0.348	1	0.772	1	0.218	1	0.71	1	0.301	1	amino sugar metabolism	P
GO:0006041	27	0.952	1	0.459	1	0.73	1	0.501	1	0.963	1	0.517	1	0.629	1	0.432	1	glucosamine metabolism	P
GO:0006044	27	0.952	1	0.459	1	0.73	1	0.501	1	0.963	1	0.517	1	0.629	1	0.432	1	N-acetylglucosamine metabolism	P
GO:0006066	400	0.000127	0.025	0.00241	0.177	0.000415	0.036	0.00249	0.147	0.000405	0.022	0.0277	1	0.219	1	0.00323	0.185	alcohol metabolism	P
GO:0006071	36	0.0251	1	0.027	1	0.0478	1	0.0514	1	0.0672	1	0.0889	1	0.119	1	0.128	1	glycerol metabolism	P
GO:0006072	19	0.271	1	0.0274	1	0.446	1	0.103	1	0.422	1	0.125	1	0.18	1	0.0721	1	glycerol-3-phosphate metabolism	P
GO:0006073	57	0.807	1	0.6	1	0.863	1	0.697	1	0.675	1	0.328	1	0.799	1	0.903	1	glucan metabolism	P
GO:0006081	18	0.0496	1	0.3	1	0.0127	0.532	0.642	1	0.177	1	0.208	1	0.628	1	0.72	1	aldehyde metabolism	P
GO:0006082	670	4.23e-05	0.01	1.89e-06	0.00839	0.000437	0.036	8.25e-05	0.012	0.00012	0.017	3.49e-05	0.012	0.126	1	0.00515	0.36	organic acid metabolism	P
GO:0006084	28	0.137	1	0.243	1	0.0386	1	0.143	1	0.18	1	0.379	1	0.694	1	0.29	1	acetyl-CoA metabolism	P
GO:0006090	29	0.386	1	0.327	1	0.51	1	0.541	1	0.362	1	0.479	1	0.389	1	0.0952	1	pyruvate metabolism	P
GO:0006091	324	3.58e-09	0.000806	9.89e-07	0.00839	2.38e-06	0.00242	0.000833	0.059	2.03e-08	0.000964	5.86e-06	0.004	0.0152	0.647	0.00498	0.36	generation of precursor metabolites and energy	P
GO:0006092	128	6.89e-05	0.0124	0.00026	0.0419	3.45e-05	0.006	0.0014	0.115	0.000525	0.022	0.0038	0.27	0.106	1	0.0204	1	main pathways of carbohydrate metabolism	P
GO:0006094	26	0.268	1	0.138	1	0.392	1	0.381	1	0.28	1	0.301	1	0.281	1	0.0438	1	gluconeogenesis	P
GO:0006096	67	0.00338	0.273	0.0153	1	0.000411	0.036	0.0207	1	0.0225	1	0.0364	1	0.258	1	0.244	1	glycolysis	P
GO:0006098	10	0.0202	1	0.0113	0.677	0.0166	0.693	0.0705	1	0.0505	1	0.0843	1	0.125	1	0.0732	1	pentose-phosphate shunt	P
GO:0006099	24	0.0617	1	0.165	1	0.0133	0.553	0.083	1	0.108	1	0.27	1	0.49	1	0.267	1	tricarboxylic acid cycle	P
GO:0006100	22	0.043	1	0.148	1	0.0706	1	0.0383	1	0.0354	1	0.212	1	0.706	1	0.697	1	tricarboxylic acid cycle intermediate metabolism	P
GO:0006109	18	0.267	1	0.432	1	0.201	1	0.372	1	0.231	1	0.282	1	0.619	1	0.995	1	regulation of carbohydrate metabolism	P
GO:0006110	10	0.0634	1	0.228	1	0.0618	1	0.164	1	0.0858	1	0.246	1	0.102	1	0.83	1	regulation of glycolysis	P
GO:0006112	63	0.596	1	0.57	1	0.633	1	0.675	1	0.433	1	0.316	1	0.873	1	0.916	1	energy reserve metabolism	P
GO:0006118	59	0.000553	0.0337	0.0374	1	0.0444	1	0.312	1	0.00121	0.078	0.0505	1	0.0313	1	0.0747	1	electron transport	P
GO:0006119	77	1.93e-06	0.00195	0.0117	0.677	0.00438	0.327	0.0567	1	7.62e-06	0.00288	0.0254	1	0.0042	0.357	0.119	1	oxidative phosphorylation	P
GO:0006120	37	0.000178	0.025	0.0199	1	0.0399	1	0.109	1	0.000828	0.044	0.0429	1	0.0162	0.663	0.0651	1	mitochondrial electron transport, NADH to ubiquinone	P
GO:0006139	4139	0	0	0	0	1.22e-25	0	7.05e-33	0	0	0	0	0	3.75e-23	0	4.72e-26	0	nucleobase, nucleoside, nucleotide and nucleic acid metabolism	P
GO:0006140	16	0.104	1	0.0905	1	0.283	1	0.108	1	0.0842	1	0.128	1	0.406	1	0.313	1	regulation of nucleotide metabolism	P
GO:0006144	10	0.0227	1	0.0823	1	0.715	1	0.192	1	0.0291	1	0.0374	1	0.0171	0.911	0.546	1	purine base metabolism	P
GO:0006163	80	0.000556	0.0337	0.00889	0.503	0.0279	1	0.0413	1	0.000427	0.022	0.00704	0.53	0.117	1	0.314	1	purine nucleotide metabolism	P
GO:0006164	65	0.000366	0.0337	0.0436	1	0.0223	1	0.0723	1	0.000649	0.04	0.0388	1	0.0254	1	0.538	1	purine nucleotide biosynthesis	P
GO:0006171	20	0.577	1	0.421	1	0.738	1	0.455	1	0.385	1	0.355	1	0.771	1	0.552	1	cAMP biosynthesis	P
GO:0006182	13	0.956	1	0.709	1	0.95	1	0.623	1	0.961	1	0.693	1	0.391	1	0.899	1	cGMP biosynthesis	P
GO:0006183	11	0.0248	1	0.166	1	0.0236	1	0.163	1	0.0363	1	0.235	1	0.188	1	0.238	1	GTP biosynthesis	P
GO:0006206	10	0.105	1	0.135	1	0.27	1	0.246	1	0.101	1	0.199	1	0.263	1	0.0484	1	pyrimidine base metabolism	P
GO:0006213	12	0.467	1	0.376	1	0.984	1	0.123	1	0.353	1	0.881	1	0.275	1	0.0497	1	pyrimidine nucleoside metabolism	P
GO:0006220	31	0.0426	1	0.013	0.747	0.464	1	0.0254	1	0.0226	1	0.0305	1	0.0971	1	0.0273	1	pyrimidine nucleotide metabolism	P
GO:0006221	22	0.0266	1	0.0405	1	0.355	1	0.0492	1	0.0157	1	0.0798	1	0.0904	1	0.112	1	pyrimidine nucleotide biosynthesis	P
GO:0006228	11	0.0248	1	0.166	1	0.0236	1	0.163	1	0.0363	1	0.235	1	0.188	1	0.238	1	UTP biosynthesis	P
GO:0006241	12	0.0215	1	0.103	1	0.0538	1	0.0883	1	0.0246	1	0.188	1	0.17	1	0.159	1	CTP biosynthesis	P
GO:0006259	905	4.15e-22	0	2.26e-23	0	1.12e-09	0.000934	2.88e-11	0	9.28e-21	0	2.95e-21	0	4.64e-06	0.002	8.19e-07	0.00188	DNA metabolism	P
GO:0006260	222	3.33e-12	0	3.88e-10	0	2.53e-06	0.00242	5.93e-07	0.00196	1.42e-10	0	6.06e-10	0	0.000161	0.025	0.0499	1	DNA replication	P
GO:0006261	119	4.5e-08	0.00184	3.03e-07	0.00839	0.000539	0.036	5.35e-05	0.008	9.06e-08	0.00169	5.83e-07	0.00297	0.00413	0.357	0.348	1	DNA-dependent DNA replication	P
GO:0006265	24	0.0571	1	0.56	1	0.153	1	0.135	1	0.161	1	0.724	1	0.108	1	0.823	1	DNA topological change	P
GO:0006268	13	0.00933	0.667	0.202	1	0.119	1	0.188	1	0.000896	0.044	0.201	1	0.241	1	0.906	1	DNA unwinding during replication	P
GO:0006270	28	0.00479	0.328	0.00259	0.177	0.0148	0.693	0.218	1	0.0254	1	0.00132	0.064	0.0375	1	0.0278	1	DNA replication initiation	P
GO:0006275	46	0.00033	0.0337	0.00235	0.177	0.00125	0.098	0.00707	0.453	0.000894	0.044	0.00464	0.27	0.117	1	0.129	1	regulation of DNA replication	P
GO:0006281	296	1.59e-08	0.000977	6.73e-08	0.00497	0.000138	0.015	1.37e-06	0.002	9.67e-08	0.00169	3.25e-07	0.00297	0.0115	0.63	0.199	1	DNA repair	P
GO:0006284	27	0.0118	0.667	0.0721	1	0.125	1	0.0122	0.818	0.00848	0.539	0.0649	1	0.518	1	0.991	1	base-excision repair	P
GO:0006289	57	0.00053	0.0337	0.0413	1	0.0588	1	0.0678	1	0.000499	0.022	0.029	1	0.0492	1	0.939	1	nucleotide-excision repair	P
GO:0006297	17	0.00013	0.025	0.0195	1	0.129	1	0.19	1	8.1e-06	0.00288	0.00359	0.27	0.0927	1	0.536	1	nucleotide-excision repair, DNA gap filling	P
GO:0006298	29	0.00143	0.202	0.000162	0.015	0.155	1	0.00305	0.147	0.000626	0.04	8.03e-05	0.017	0.0789	1	0.876	1	mismatch repair	P
GO:0006302	40	0.0222	1	0.00156	0.091	0.00633	0.46	0.128	1	0.119	1	0.000466	0.041	0.0892	1	0.315	1	double-strand break repair	P
GO:0006303	10	0.431	1	0.605	1	0.317	1	1	1	0.431	1	0.0542	1	0.395	1	0.999	1	double-strand break repair via nonhomologous end joining	P
GO:0006304	30	0.128	1	0.0403	1	0.232	1	0.0593	1	0.0957	1	0.0168	0.86	0.589	1	0.559	1	DNA modification	P
GO:0006305	20	0.028	1	0.0119	0.677	0.0682	1	0.0514	1	0.0485	1	0.00519	0.27	0.385	1	0.246	1	DNA alkylation	P
GO:0006306	20	0.028	1	0.0119	0.677	0.0682	1	0.0514	1	0.0485	1	0.00519	0.27	0.385	1	0.246	1	DNA methylation	P
GO:0006308	24	0.0558	1	0.0263	1	0.118	1	0.00633	0.364	0.129	1	0.241	1	0.12	1	0.207	1	DNA catabolism	P
GO:0006309	16	0.203	1	0.214	1	0.267	1	0.0236	1	0.268	1	0.53	1	0.273	1	0.828	1	DNA fragmentation during apoptosis	P
GO:0006310	110	0.000509	0.0337	0.000119	0.015	0.0185	1	0.0012	0.115	0.000609	0.04	0.000124	0.017	0.282	1	0.546	1	DNA recombination	P
GO:0006323	413	1.49e-10	0	1.09e-13	0	0.0035	0.327	0.00145	0.115	7.48e-12	0	2.73e-13	0	0.00272	0.195	1.2e-07	0.00188	DNA packaging	P
GO:0006325	409	4.91e-10	0.000806	2.61e-13	0	0.00498	0.419	0.00253	0.147	2.96e-11	0	2.86e-13	0	0.00261	0.195	3.25e-07	0.00188	establishment and/or maintenance of chromatin architecture	P
GO:0006333	234	0.00152	0.202	0.00324	0.197	0.792	1	0.849	1	6.64e-05	0.017	0.00199	0.161	0.0295	1	0.000252	0.027	chromatin assembly or disassembly	P
GO:0006334	179	0.0385	1	0.0908	1	0.997	1	0.962	1	0.00148	0.176	0.0542	1	0.0984	1	0.0106	0.481	nucleosome assembly	P
GO:0006338	55	9.95e-06	0.007	1.16e-06	0.00839	0.00409	0.327	0.00047	0.047	3.09e-06	0.0026	1.63e-05	0.00763	0.0339	1	0.000291	0.027	chromatin remodeling	P
GO:0006342	13	0.00722	0.634	0.0229	1	0.138	1	0.0705	1	0.00179	0.176	0.041	1	0.0864	1	0.0134	0.647	chromatin silencing	P
GO:0006350	2793	7.29e-32	0	3.75e-41	0	3.68e-13	0	3.28e-17	0	7.88e-31	0	1.57e-36	0	1.36e-10	0	1.21e-15	0	transcription	P
GO:0006351	2589	2.79e-28	0	2.14e-35	0	8.62e-11	0.000934	1.3e-13	0	2.08e-28	0	9.83e-32	0	3.67e-09	0	1.93e-15	0	transcription, DNA-dependent	P
GO:0006352	106	1.09e-09	0.000806	4.23e-06	0.00839	5.04e-05	0.012	0.0109	0.818	9.26e-08	0.00169	7.39e-06	0.00488	0.00152	0.168	0.00678	0.481	transcription initiation	P
GO:0006354	50	4.92e-06	0.007	1.51e-05	0.00958	0.0006	0.036	0.00879	0.713	5.55e-05	0.00635	5.64e-05	0.017	0.00436	0.357	0.0071	0.481	RNA elongation	P
GO:0006355	2516	1.98e-26	0	9.48e-34	0	3.57e-10	0.000934	2.43e-13	0	1.65e-26	0	2.44e-30	0	1.21e-08	0.000855	1.9e-14	0	regulation of transcription, DNA-dependent	P
GO:0006357	563	0.000124	0.025	0.00519	0.36	0.000988	0.098	0.0073	0.455	0.000516	0.022	0.0218	1	0.0338	1	0.0841	1	regulation of transcription from RNA polymerase II promoter	P
GO:0006360	11	0.138	1	0.541	1	0.296	1	0.449	1	0.166	1	0.59	1	0.0918	1	0.711	1	transcription from RNA polymerase I promoter	P
GO:0006364	71	0.00564	0.35	0.106	1	0.0887	1	0.325	1	0.00441	0.36	0.228	1	0.139	1	0.108	1	rRNA processing	P
GO:0006366	728	5.44e-08	0.00184	6.17e-06	0.00839	2.27e-05	0.006	0.000271	0.027	4.12e-07	0.00169	6.56e-05	0.017	0.00543	0.357	0.0148	0.849	transcription from RNA polymerase II promoter	P
GO:0006367	68	6.95e-08	0.00184	1.02e-05	0.00958	5.27e-05	0.012	0.00434	0.346	5.72e-06	0.00288	8.63e-06	0.00488	0.00371	0.357	0.182	1	transcription initiation from RNA polymerase II promoter	P
GO:0006368	47	1.28e-05	0.007	1.41e-05	0.00958	0.00078	0.045	0.0115	0.818	0.000121	0.017	3.9e-05	0.012	0.00616	0.357	0.00859	0.481	RNA elongation from RNA polymerase II promoter	P
GO:0006376	16	0.0599	1	0.027	1	0.059	1	0.0115	0.818	0.151	1	0.0479	1	0.131	1	0.565	1	mRNA splice site selection	P
GO:0006383	28	0.00758	0.634	0.0291	1	0.175	1	0.26	1	0.0129	1	0.0318	1	0.0281	1	0.12	1	transcription from RNA polymerase III promoter	P
GO:0006396	497	3.31e-27	0	1.24e-25	0	4.47e-12	0	2.28e-11	0	7.07e-24	0	8.18e-22	0	3.84e-09	0	6.2e-10	0.000771	RNA processing	P
GO:0006397	301	4.43e-18	0	1.37e-20	0	2.99e-09	0.000934	7.37e-09	0.000971	2.9e-15	0	1.25e-18	0	1.36e-06	0.00195	5.47e-08	0.00188	mRNA processing	P
GO:0006399	136	3.98e-05	0.01	0.000116	0.015	0.00504	0.419	0.0149	0.818	5.17e-05	0.00635	0.000244	0.026	0.0379	1	0.0385	1	tRNA metabolism	P
GO:0006400	12	0.387	1	0.24	1	0.527	1	0.867	1	0.378	1	0.0518	1	0.2	1	0.753	1	tRNA modification	P
GO:0006401	48	4.59e-08	0.00184	2.74e-06	0.00839	0.00104	0.098	0.0051	0.346	3.66e-06	0.0026	1.01e-05	0.00488	8.07e-05	0.025	0.0035	0.185	RNA catabolism	P
GO:0006402	31	9.96e-09	0.000806	4.85e-05	0.00958	0.000184	0.024	0.00668	0.453	3.68e-07	0.00169	0.000211	0.026	0.000297	0.034	0.00402	0.185	mRNA catabolism	P
GO:0006403	90	1.83e-07	0.00195	8.44e-11	0	0.000196	0.024	4.9e-06	0.008	7.26e-07	0.00245	7.25e-10	0	0.023	1	0.000195	0.02	RNA localization	P
GO:0006405	33	1.47e-06	0.00195	7.06e-05	0.01	0.000223	0.024	0.00677	0.453	6.79e-05	0.017	2.73e-05	0.012	0.0205	0.911	0.00492	0.36	RNA export from nucleus	P
GO:0006406	25	6.87e-05	0.0124	0.000881	0.069	0.00241	0.248	0.016	0.818	0.000701	0.04	0.000331	0.0307	0.0137	0.647	0.00971	0.481	mRNA export from nucleus	P
GO:0006412	805	2.67e-20	0	8.12e-15	0	1.62e-09	0.000934	6.54e-05	0.012	5.8e-18	0	6.99e-15	0	1.86e-08	0.000855	3.09e-06	0.00188	protein biosynthesis	P
GO:0006413	67	2.26e-07	0.00195	2.59e-07	0.00839	0.000104	0.012	0.000524	0.047	3.26e-07	0.00169	1.22e-06	0.00297	0.022	1	0.00456	0.36	translational initiation	P
GO:0006414	105	9.43e-11	0	5.79e-10	0	0.00184	0.248	0.00399	0.241	1.1e-10	0	1.32e-07	0.00092	0.000231	0.034	2.31e-06	0.00188	translational elongation	P
GO:0006415	11	0.0144	0.667	0.0628	1	0.0556	1	0.0393	1	0.0636	1	0.155	1	0.0125	0.63	0.0514	1	translational termination	P
GO:0006417	183	0.000221	0.0264	1.62e-05	0.00958	4.13e-05	0.012	0.000547	0.047	0.00516	0.418	7.56e-05	0.017	0.0232	1	0.00513	0.36	regulation of protein biosynthesis	P
GO:0006418	72	0.0033	0.273	0.00683	0.36	0.0218	1	0.104	1	0.00497	0.418	0.0088	0.739	0.15	1	0.112	1	tRNA aminoacylation for protein translation	P
GO:0006445	58	2.08e-06	0.00195	9.98e-07	0.00839	0.000138	0.015	0.000732	0.047	2.18e-05	0.005	1.42e-05	0.00763	0.00851	0.63	0.00069	0.0916	regulation of translation	P
GO:0006446	42	4.14e-07	0.00195	2.52e-06	0.00839	0.000199	0.024	0.00238	0.147	3.85e-06	0.0026	1.59e-05	0.00763	0.0398	1	0.00554	0.36	regulation of translational initiation	P
GO:0006457	200	2.95e-08	0.000977	7.39e-08	0.00497	5.02e-05	0.012	0.000311	0.042	1.1e-07	0.00169	2.89e-08	0.000837	0.0129	0.63	0.435	1	protein folding	P
GO:0006461	474	0.000421	0.0337	1.31e-06	0.00839	0.445	1	0.000878	0.059	7.17e-05	0.017	1.93e-05	0.00763	0.0115	0.63	0.00161	0.0916	protein complex assembly	P
GO:0006464	1894	4.99e-20	0	2.8e-35	0	1.13e-09	0.000934	4.74e-21	0	1.1e-19	0	5.85e-31	0	0.000246	0.034	1.07e-11	0	protein modification	P
GO:0006468	721	0.000144	0.025	3.01e-10	0	0.00183	0.248	2.11e-08	0.000971	0.000134	0.017	6.49e-08	0.000837	0.2	1	0.000292	0.027	protein amino acid phosphorylation	P
GO:0006469	64	0.016	0.667	0.00367	0.197	0.114	1	0.08	1	0.0112	0.539	0.00461	0.27	0.349	1	0.133	1	negative regulation of protein kinase activity	P
GO:0006470	149	0.125	1	0.00213	0.129	0.362	1	0.0109	0.818	0.107	1	0.00453	0.27	0.276	1	0.0491	1	protein amino acid dephosphorylation	P
GO:0006471	20	0.0252	1	0.0312	1	0.212	1	0.00345	0.202	0.0179	1	0.06	1	0.159	1	0.141	1	protein amino acid ADP-ribosylation	P
GO:0006473	22	0.000657	0.0344	9.97e-06	0.00958	0.00859	0.46	0.0355	1	0.00161	0.176	0.000116	0.017	0.154	1	0.000553	0.0916	protein amino acid acetylation	P
GO:0006476	19	0.0982	1	0.206	1	0.0931	1	0.296	1	0.108	1	0.116	1	0.348	1	0.633	1	protein amino acid deacetylation	P
GO:0006479	28	0.00432	0.328	0.000493	0.069	0.455	1	0.0139	0.818	0.00134	0.078	0.00111	0.0549	0.149	1	0.0311	1	protein amino acid methylation	P
GO:0006486	121	0.182	1	0.00646	0.36	0.532	1	0.444	1	0.0906	1	0.0013	0.064	0.475	1	0.0511	1	protein amino acid glycosylation	P
GO:0006487	42	0.368	1	0.162	1	0.547	1	0.585	1	0.253	1	0.0966	1	0.576	1	0.255	1	protein amino acid N-linked glycosylation	P
GO:0006493	24	0.258	1	0.217	1	0.147	1	0.699	1	0.409	1	0.14	1	0.299	1	0.208	1	protein amino acid O-linked glycosylation	P
GO:0006497	51	0.00143	0.202	0.137	1	0.0991	1	0.394	1	0.000679	0.04	0.087	1	0.158	1	0.335	1	protein amino acid lipidation	P
GO:0006505	34	0.0119	0.667	0.161	1	0.0457	1	0.333	1	0.0139	1	0.109	1	0.174	1	0.546	1	GPI anchor metabolism	P
GO:0006506	31	0.0153	0.667	0.182	1	0.0795	1	0.269	1	0.0144	1	0.158	1	0.284	1	0.493	1	GPI anchor biosynthesis	P
GO:0006508	852	0.00106	0.096	3.81e-08	0.00497	0.012	0.532	0.000394	0.042	0.00239	0.285	2.94e-07	0.000941	0.0543	1	4.21e-05	0.009	proteolysis	P
GO:0006509	12	0.237	1	0.158	1	0.527	1	0.387	1	0.14	1	0.124	1	0.64	1	0.317	1	membrane protein ectodomain proteolysis	P
GO:0006511	230	5.01e-06	0.007	1.07e-09	0	0.0123	0.532	1.03e-05	0.008	2.36e-05	0.005	2.24e-08	0.000837	0.00083	0.065	0.000235	0.027	ubiquitin-dependent protein catabolism	P
GO:0006512	594	3.46e-14	0	1.79e-17	0	2.59e-07	0.00242	3.52e-11	0	1.34e-12	0	3.44e-15	0	0.000103	0.025	9.23e-07	0.00188	ubiquitin cycle	P
GO:0006515	18	0.021	1	2.66e-06	0.00839	0.0748	1	0.0469	1	0.0763	1	5.44e-05	0.017	0.0398	1	0.00888	0.481	misfolded or incompletely synthesized protein catabolism	P
GO:0006516	17	0.511	1	0.104	1	0.764	1	0.458	1	0.3	1	0.166	1	0.594	1	0.0492	1	glycoprotein catabolism	P
GO:0006518	23	0.253	1	0.988	1	0.36	1	0.966	1	0.179	1	0.936	1	0.75	1	0.999	1	peptide metabolism	P
GO:0006519	478	0.00147	0.202	0.000567	0.069	0.0014	0.098	0.00104	0.083	0.00302	0.285	0.00129	0.064	0.239	1	0.26	1	amino acid and derivative metabolism	P
GO:0006520	393	0.00451	0.328	0.00111	0.091	0.00356	0.327	0.00329	0.147	0.00722	0.539	0.00226	0.164	0.421	1	0.322	1	amino acid metabolism	P
GO:0006521	91	0.889	1	0.937	1	0.429	1	0.45	1	0.866	1	0.959	1	0.983	1	0.961	1	regulation of amino acid metabolism	P
GO:0006525	13	0.274	1	0.0562	1	0.343	1	0.232	1	0.306	1	0.0333	1	0.286	1	0.22	1	arginine metabolism	P
GO:0006536	14	0.151	1	0.345	1	0.31	1	0.173	1	0.143	1	0.443	1	0.151	1	0.569	1	glutamate metabolism	P
GO:0006541	18	0.045	1	0.286	1	0.615	1	0.973	1	0.0136	1	0.0456	1	0.564	1	0.701	1	glutamine metabolism	P
GO:0006544	14	0.33	1	0.0745	1	0.909	1	0.0985	1	0.175	1	0.0496	1	0.454	1	0.504	1	glycine metabolism	P
GO:0006547	12	0.677	1	0.965	1	0.341	1	0.826	1	0.647	1	0.935	1	0.954	1	0.951	1	histidine metabolism	P
GO:0006555	10	0.676	1	0.412	1	0.582	1	0.529	1	0.495	1	0.299	1	1	1	0.952	1	methionine metabolism	P
GO:0006560	10	0.0194	1	0.0322	1	0.08	1	0.00906	0.713	0.0497	1	0.0943	1	0.0634	1	0.0665	1	proline metabolism	P
GO:0006570	13	0.802	1	0.5	1	0.868	1	0.592	1	0.6	1	0.668	1	0.983	1	0.112	1	tyrosine metabolism	P
GO:0006575	146	0.144	1	0.123	1	0.07	1	0.0433	1	0.3	1	0.186	1	0.128	1	0.234	1	amino acid derivative metabolism	P
GO:0006576	79	0.58	1	0.462	1	0.361	1	0.161	1	0.643	1	0.481	1	0.492	1	0.705	1	biogenic amine metabolism	P
GO:0006582	10	0.869	1	0.78	1	0.85	1	0.21	1	0.654	1	0.985	1	1	1	0.113	1	melanin metabolism	P
GO:0006584	32	0.824	1	0.588	1	0.388	1	0.125	1	0.906	1	0.727	1	0.837	1	0.449	1	catecholamine metabolism	P
GO:0006586	11	0.245	1	0.427	1	0.196	1	0.702	1	0.642	1	0.232	1	0.0719	1	0.727	1	indolalkylamine metabolism	P
GO:0006595	15	0.0258	1	0.000582	0.069	0.118	1	0.00611	0.346	0.0185	1	0.00153	0.161	0.173	1	0.0111	0.511	polyamine metabolism	P
GO:0006596	10	0.107	1	0.00169	0.091	0.198	1	0.00301	0.147	0.109	1	0.0165	0.86	0.241	1	5.27e-06	0.00188	polyamine biosynthesis	P
GO:0006605	215	9.68e-09	0.000806	3.6e-10	0	3.43e-05	0.006	0.00143	0.115	4.95e-08	0.000964	2.5e-10	0	0.00322	0.195	0.000328	0.027	protein targeting	P
GO:0006606	98	5.76e-05	0.011	3.99e-08	0.00497	0.0503	1	0.00365	0.202	4.42e-05	0.00635	1.8e-07	0.00092	0.00476	0.357	0.00275	0.185	protein import into nucleus	P
GO:0006607	13	0.181	1	0.00583	0.36	0.357	1	0.0267	1	0.17	1	0.0136	0.739	0.0954	1	0.156	1	NLS-bearing substrate import into nucleus	P
GO:0006611	20	0.00162	0.202	0.00065	0.069	0.032	1	0.02	1	0.00124	0.078	0.000407	0.041	0.229	1	0.00523	0.36	protein export from nucleus	P
GO:0006612	30	0.0347	1	0.303	1	0.0538	1	0.776	1	0.072	1	0.421	1	0.0326	1	0.0607	1	protein targeting to membrane	P
GO:0006613	17	0.23	1	0.587	1	0.147	1	0.966	1	0.345	1	0.575	1	0.191	1	0.178	1	cotranslational protein targeting to membrane	P
GO:0006614	11	0.325	1	0.408	1	0.242	1	0.844	1	0.376	1	0.466	1	0.403	1	0.107	1	SRP-dependent cotranslational protein targeting to membrane	P
GO:0006625	13	0.199	1	0.275	1	0.538	1	0.572	1	0.16	1	0.183	1	0.307	1	0.318	1	protein targeting to peroxisome	P
GO:0006626	20	0.00417	0.328	0.0779	1	0.0127	0.532	0.238	1	0.0171	1	0.0488	1	0.261	1	0.463	1	protein targeting to mitochondrion	P
GO:0006629	825	0.00179	0.202	0.000287	0.0419	0.0559	1	0.00507	0.346	0.00472	0.418	0.00134	0.064	0.00411	0.357	0.00157	0.0916	lipid metabolism	P
GO:0006631	190	0.0709	1	0.00622	0.36	0.376	1	0.0934	1	0.101	1	0.0215	1	0.0281	1	0.00205	0.14	fatty acid metabolism	P
GO:0006633	77	0.117	1	0.00233	0.177	0.175	1	0.0252	1	0.286	1	0.00725	0.53	0.0833	1	0.0785	1	fatty acid biosynthesis	P
GO:0006635	22	0.225	1	0.183	1	0.192	1	0.648	1	0.179	1	0.106	1	0.442	1	0.284	1	fatty acid beta-oxidation	P
GO:0006637	11	0.0778	1	0.0805	1	0.253	1	0.00925	0.713	0.0274	1	0.211	1	0.901	1	0.361	1	acyl-CoA metabolism	P
GO:0006638	35	0.324	1	0.0887	1	0.293	1	0.321	1	0.433	1	0.0713	1	0.162	1	0.0884	1	neutral lipid metabolism	P
GO:0006639	35	0.324	1	0.0887	1	0.293	1	0.321	1	0.433	1	0.0713	1	0.162	1	0.0884	1	acylglycerol metabolism	P
GO:0006641	30	0.226	1	0.0733	1	0.236	1	0.234	1	0.368	1	0.0629	1	0.0806	1	0.116	1	triacylglycerol metabolism	P
GO:0006643	238	0.000222	0.0264	0.000173	0.015	0.0189	1	0.00841	0.713	0.000586	0.04	0.000689	0.0549	0.0178	0.911	0.0106	0.481	membrane lipid metabolism	P
GO:0006644	181	0.00235	0.202	0.00341	0.197	0.0284	1	0.0242	1	0.00732	0.539	0.0067	0.53	0.0339	1	0.0617	1	phospholipid metabolism	P
GO:0006650	91	0.00167	0.202	0.0003	0.0419	0.0644	1	0.0109	0.818	0.00151	0.176	0.000762	0.0549	0.0997	1	0.0109	0.511	glycerophospholipid metabolism	P
GO:0006662	37	0.217	1	0.0742	1	0.303	1	0.352	1	0.271	1	0.0465	1	0.135	1	0.0931	1	glycerol ether metabolism	P
GO:0006664	27	0.161	1	0.126	1	0.625	1	0.604	1	0.0877	1	0.129	1	0.364	1	0.0731	1	glycolipid metabolism	P
GO:0006665	65	0.00375	0.328	0.00413	0.197	0.0692	1	0.175	1	0.00434	0.36	0.00549	0.27	0.095	1	0.0402	1	sphingolipid metabolism	P
GO:0006672	33	0.00868	0.634	0.00498	0.36	0.0909	1	0.196	1	0.00706	0.539	0.0204	1	0.124	1	0.00108	0.0916	ceramide metabolism	P
GO:0006684	11	0.0434	1	0.308	1	0.0238	1	0.429	1	0.188	1	0.182	1	0.197	1	0.984	1	sphingomyelin metabolism	P
GO:0006687	18	0.306	1	0.114	1	0.718	1	0.63	1	0.146	1	0.117	1	0.81	1	0.0282	1	glycosphingolipid metabolism	P
GO:0006690	42	0.246	1	0.0632	1	0.227	1	0.202	1	0.375	1	0.125	1	0.156	1	0.0115	0.647	icosanoid metabolism	P
GO:0006691	23	0.209	1	0.28	1	0.295	1	0.368	1	0.29	1	0.384	1	0.262	1	0.119	1	leukotriene metabolism	P
GO:0006692	17	0.333	1	0.0576	1	0.163	1	0.104	1	0.45	1	0.119	1	0.266	1	0.0361	1	prostanoid metabolism	P
GO:0006693	17	0.333	1	0.0576	1	0.163	1	0.104	1	0.45	1	0.119	1	0.266	1	0.0361	1	prostaglandin metabolism	P
GO:0006694	99	0.725	1	0.927	1	0.25	1	0.58	1	0.853	1	0.949	1	0.688	1	0.741	1	steroid biosynthesis	P
GO:0006695	27	0.157	1	0.158	1	0.236	1	0.0985	1	0.199	1	0.335	1	0.181	1	0.224	1	cholesterol biosynthesis	P
GO:0006700	12	0.623	1	0.972	1	0.795	1	0.989	1	0.452	1	0.897	1	0.847	1	0.998	1	C21-steroid hormone biosynthesis	P
GO:0006706	18	0.0644	1	0.419	1	0.0345	1	0.119	1	0.139	1	0.666	1	0.297	1	0.215	1	steroid catabolism	P
GO:0006707	10	0.189	1	0.522	1	0.0196	1	0.109	1	0.567	1	0.944	1	0.447	1	0.21	1	cholesterol catabolism	P
GO:0006720	30	0.976	1	0.67	1	0.579	1	0.24	1	0.999	1	0.711	1	0.407	1	0.899	1	isoprenoid metabolism	P
GO:0006725	170	0.158	1	0.0693	1	0.195	1	0.02	1	0.188	1	0.171	1	0.312	1	0.14	1	aromatic compound metabolism	P
GO:0006730	112	0.000749	0.0671	3.25e-06	0.00839	0.106	1	3.14e-05	0.008	0.0002	0.017	2.58e-05	0.012	0.273	1	0.0278	1	one-carbon compound metabolism	P
GO:0006732	175	3.76e-06	0.007	0.000166	0.015	6.26e-06	0.00266	0.000223	0.027	5.65e-05	0.00635	0.00576	0.351	0.0574	1	0.00683	0.481	coenzyme metabolism	P
GO:0006733	40	0.00739	0.634	0.00107	0.091	0.00855	0.46	0.00261	0.147	0.0503	1	0.012	0.739	0.0182	0.911	0.058	1	oxidoreduction coenzyme metabolism	P
GO:0006739	14	0.0271	1	0.00693	0.36	0.0555	1	0.0862	1	0.0882	1	0.0484	1	0.0299	1	0.079	1	NADP metabolism	P
GO:0006740	10	0.0202	1	0.0113	0.677	0.0166	0.693	0.0705	1	0.0505	1	0.0843	1	0.125	1	0.0732	1	NADPH regeneration	P
GO:0006749	28	0.00389	0.328	0.0988	1	0.0309	1	0.196	1	0.0187	1	0.238	1	0.154	1	0.0487	1	glutathione metabolism	P
GO:0006750	10	0.148	1	0.538	1	0.281	1	0.316	1	0.147	1	0.691	1	0.656	1	0.476	1	glutathione biosynthesis	P
GO:0006752	62	0.00263	0.239	0.0884	1	0.00343	0.327	0.13	1	0.00477	0.418	0.1	1	0.218	1	0.358	1	group transfer coenzyme metabolism	P
GO:0006753	28	0.00666	0.517	0.422	1	0.0203	1	0.345	1	0.00991	0.539	0.545	1	0.133	1	0.344	1	nucleoside phosphate metabolism	P
GO:0006754	28	0.00666	0.517	0.422	1	0.0203	1	0.345	1	0.00991	0.539	0.545	1	0.133	1	0.344	1	ATP biosynthesis	P
GO:0006760	18	0.0793	1	0.0147	1	0.102	1	0.0101	0.713	0.0516	1	0.0256	1	0.839	1	0.351	1	folic acid and derivative metabolism	P
GO:0006766	84	0.179	1	0.17	1	0.0486	1	0.296	1	0.414	1	0.171	1	0.181	1	0.259	1	vitamin metabolism	P
GO:0006767	57	0.0244	1	0.00889	0.503	0.00606	0.46	0.0829	1	0.118	1	0.00967	0.739	0.0877	1	0.087	1	water-soluble vitamin metabolism	P
GO:0006769	28	0.0445	1	0.0447	1	0.0204	1	0.132	1	0.179	1	0.0907	1	0.0457	1	0.121	1	nicotinamide metabolism	P
GO:0006775	24	0.957	1	0.993	1	0.96	1	0.929	1	0.96	1	0.993	1	0.547	1	0.935	1	fat-soluble vitamin metabolism	P
GO:0006776	19	0.916	1	0.986	1	0.825	1	0.873	1	0.964	1	0.989	1	0.346	1	0.81	1	vitamin A metabolism	P
GO:0006778	28	0.0126	0.667	0.000892	0.069	0.000386	0.036	0.173	1	0.0637	1	0.000694	0.0549	0.602	1	0.0989	1	porphyrin metabolism	P
GO:0006779	22	0.0391	1	0.00159	0.091	0.00201	0.248	0.0889	1	0.165	1	0.00299	0.239	0.801	1	0.171	1	porphyrin biosynthesis	P
GO:0006783	15	0.0351	1	0.0139	0.747	0.0198	1	0.0154	0.818	0.0933	1	0.0423	1	0.614	1	0.568	1	heme biosynthesis	P
GO:0006790	90	0.0971	1	0.0849	1	0.0175	0.693	0.141	1	0.189	1	0.153	1	0.65	1	0.262	1	sulfur metabolism	P
GO:0006793	1037	9.48e-08	0.00185	7.01e-17	0	0.00029	0.036	4.97e-12	0	2.16e-07	0.00169	6.42e-13	0	0.008	0.63	2.3e-07	0.00188	phosphorus metabolism	P
GO:0006796	1037	9.48e-08	0.00185	7.01e-17	0	0.00029	0.036	4.97e-12	0	2.16e-07	0.00169	6.42e-13	0	0.008	0.63	2.3e-07	0.00188	phosphate metabolism	P
GO:0006800	160	0.161	1	0.0741	1	0.242	1	0.041	1	0.0823	1	0.185	1	0.804	1	0.164	1	oxygen and reactive oxygen species metabolism	P
GO:0006801	22	0.605	1	0.226	1	0.779	1	0.108	1	0.492	1	0.263	1	0.848	1	0.691	1	superoxide metabolism	P
GO:0006805	30	0.974	1	0.987	1	0.726	1	0.965	1	0.977	1	0.974	1	0.96	1	1	1	xenobiotic metabolism	P
GO:0006807	599	0.00239	0.202	0.000138	0.015	0.00116	0.098	0.000227	0.027	0.00356	0.285	0.000957	0.0549	0.521	1	0.0852	1	nitrogen compound metabolism	P
GO:0006809	26	0.222	1	0.11	1	0.0519	1	0.0282	1	0.343	1	0.144	1	0.389	1	0.626	1	nitric oxide biosynthesis	P
GO:0006810	3017	1.13e-22	0	3.47e-21	0	3.27e-11	0	1.88e-10	0	1.35e-22	0	1.09e-21	0	0.000297	0.034	0.00121	0.0916	transport	P
GO:0006811	989	0.394	1	0.732	1	0.531	1	0.546	1	0.268	1	0.532	1	0.837	1	0.986	1	ion transport	P
GO:0006812	690	0.121	1	0.158	1	0.3	1	0.227	1	0.0899	1	0.101	1	0.627	1	0.703	1	cation transport	P
GO:0006813	296	0.57	1	0.837	1	0.452	1	0.865	1	0.537	1	0.848	1	0.756	1	0.344	1	potassium ion transport	P
GO:0006814	142	0.997	1	0.877	1	0.883	1	0.745	1	0.991	1	0.848	1	1	1	0.899	1	sodium ion transport	P
GO:0006816	166	0.553	1	0.104	1	0.544	1	0.433	1	0.622	1	0.0275	1	0.338	1	0.837	1	calcium ion transport	P
GO:0006817	96	1	1	1	1	0.999	1	0.996	1	1	1	1	1	1	1	1	1	phosphate transport	P
GO:0006818	73	0.00341	0.273	0.0518	1	0.156	1	0.0467	1	0.00249	0.285	0.0565	1	0.115	1	0.681	1	hydrogen transport	P
GO:0006820	232	0.995	1	0.998	1	0.756	1	0.957	1	0.992	1	0.979	1	0.994	1	1	1	anion transport	P
GO:0006821	79	0.787	1	0.96	1	0.579	1	0.843	1	0.835	1	0.922	1	0.437	1	0.961	1	chloride transport	P
GO:0006825	14	0.606	1	0.111	1	0.606	1	0.335	1	0.736	1	0.119	1	0.566	1	0.458	1	copper ion transport	P
GO:0006826	34	0.506	1	0.243	1	0.706	1	0.0646	1	0.669	1	0.254	1	0.0898	1	0.889	1	iron ion transport	P
GO:0006829	24	0.00894	0.634	0.111	1	0.454	1	0.48	1	0.00317	0.285	0.0399	1	0.812	1	0.536	1	zinc ion transport	P
GO:0006833	11	0.256	1	0.12	1	0.181	1	0.24	1	0.16	1	0.0959	1	0.965	1	0.277	1	water transport	P
GO:0006835	63	0.69	1	0.873	1	0.983	1	0.758	1	0.613	1	0.851	1	0.227	1	0.955	1	dicarboxylic acid transport	P
GO:0006836	58	0.966	1	0.937	1	0.986	1	0.774	1	0.889	1	0.923	1	0.974	1	0.889	1	neurotransmitter transport	P
GO:0006839	60	2.91e-05	0.01	0.00101	0.091	0.0019	0.248	0.00211	0.124	5.71e-05	0.00635	0.00192	0.161	0.36	1	0.18	1	mitochondrial transport	P
GO:0006865	75	0.196	1	0.0188	1	0.322	1	0.249	1	0.123	1	0.00412	0.27	0.875	1	0.475	1	amino acid transport	P
GO:0006869	108	0.00142	0.202	0.000561	0.069	0.0086	0.46	0.00028	0.027	0.00116	0.078	0.00366	0.27	0.23	1	0.0818	1	lipid transport	P
GO:0006873	208	0.453	1	0.505	1	0.334	1	0.256	1	0.625	1	0.334	1	0.137	1	0.998	1	cell ion homeostasis	P
GO:0006874	129	0.589	1	0.724	1	0.516	1	0.664	1	0.639	1	0.51	1	0.303	1	0.985	1	calcium ion homeostasis	P
GO:0006875	183	0.473	1	0.562	1	0.355	1	0.249	1	0.636	1	0.417	1	0.166	1	0.998	1	metal ion homeostasis	P
GO:0006878	10	0.236	1	0.097	1	0.199	1	0.086	1	0.462	1	0.221	1	0.528	1	0.641	1	copper ion homeostasis	P
GO:0006879	33	0.408	1	0.457	1	0.379	1	0.0464	1	0.622	1	0.58	1	0.0902	1	0.913	1	iron ion homeostasis	P
GO:0006884	11	0.168	1	0.0231	1	0.0922	1	0.237	1	0.409	1	0.075	1	0.288	1	0.0343	1	regulation of cell volume	P
GO:0006885	35	0.938	1	0.805	1	0.986	1	0.709	1	0.821	1	0.69	1	0.83	1	0.998	1	regulation of pH	P
GO:0006886	517	1.57e-17	0	2.2e-16	0	2.66e-10	0.000934	4.99e-06	0.008	2.34e-15	0	3.95e-16	0	2.55e-05	0.00544	8.07e-06	0.00188	intracellular protein transport	P
GO:0006887	100	0.0188	1	0.0765	1	0.0163	0.693	0.0648	1	0.0646	1	0.17	1	0.063	1	0.124	1	exocytosis	P
GO:0006888	36	0.0805	1	0.0141	0.747	0.115	1	0.0952	1	0.096	1	0.0174	0.881	0.721	1	0.19	1	ER to Golgi vesicle-mediated transport	P
GO:0006890	16	0.0267	1	0.0981	1	0.22	1	0.372	1	0.0111	0.539	0.063	1	0.467	1	0.202	1	retrograde vesicle-mediated transport, Golgi to ER	P
GO:0006891	17	0.0947	1	0.0755	1	0.275	1	0.674	1	0.0661	1	0.0137	0.739	0.875	1	0.497	1	intra-Golgi vesicle-mediated transport	P
GO:0006892	23	0.0723	1	0.174	1	0.157	1	0.4	1	0.0521	1	0.0691	1	0.404	1	0.999	1	post-Golgi vesicle-mediated transport	P
GO:0006895	10	0.0566	1	0.276	1	0.0906	1	0.614	1	0.0427	1	0.107	1	0.271	1	1	1	Golgi to endosome transport	P
GO:0006897	217	1.86e-05	0.008	1.07e-07	0.00497	0.0012	0.098	0.00452	0.346	2.85e-05	0.005	2.93e-07	0.000941	0.0698	1	0.000741	0.0916	endocytosis	P
GO:0006898	52	0.0497	1	0.0328	1	0.0715	1	0.125	1	0.024	1	0.0467	1	0.586	1	0.221	1	receptor mediated endocytosis	P
GO:0006900	12	0.0297	1	0.133	1	0.225	1	0.134	1	0.0174	1	0.202	1	0.152	1	0.161	1	vesicle budding	P
GO:0006901	10	0.0817	1	0.274	1	0.358	1	0.384	1	0.0471	1	0.278	1	0.257	1	0.277	1	vesicle coating	P
GO:0006903	21	0.015	0.667	0.0576	1	0.144	1	0.204	1	0.00513	0.418	0.06	1	0.136	1	0.144	1	vesicle targeting	P
GO:0006904	20	0.0365	1	0.21	1	0.0579	1	0.0838	1	0.106	1	0.224	1	0.0467	1	0.665	1	vesicle docking during exocytosis	P
GO:0006909	46	0.207	1	0.0224	1	0.169	1	0.0402	1	0.167	1	0.0267	1	0.776	1	0.238	1	phagocytosis	P
GO:0006913	266	6.09e-10	0.000806	2.85e-10	0	5.96e-05	0.012	0.000556	0.047	4.69e-09	0.000964	2.62e-10	0	6.73e-05	0.025	3e-05	0.009	nucleocytoplasmic transport	P
GO:0006914	28	0.000954	0.083	0.00617	0.36	0.0184	1	0.13	1	0.00131	0.078	0.00204	0.161	0.0594	1	0.324	1	autophagy	P
GO:0006915	872	4.34e-10	0.000806	8.81e-14	0	4.79e-08	0.000968	4.69e-08	0.000971	4.56e-08	0.000964	5.25e-11	0	0.000136	0.025	4.88e-07	0.00188	apoptosis	P
GO:0006916	171	5.83e-05	0.011	0.000521	0.069	0.00222	0.248	0.00766	0.455	7.09e-05	0.017	0.0055	0.27	0.01	0.63	0.000756	0.0916	anti-apoptosis	P
GO:0006917	244	3.12e-05	0.01	2.39e-06	0.00839	0.000153	0.015	2.15e-05	0.008	0.000182	0.017	8.06e-05	0.017	0.0372	1	0.00556	0.36	induction of apoptosis	P
GO:0006919	44	4.77e-05	0.01	0.000376	0.069	0.00267	0.248	0.101	1	0.000183	0.017	0.000101	0.017	0.00556	0.357	0.0143	0.849	caspase activation	P
GO:0006921	21	0.0902	1	0.148	1	0.213	1	0.0158	0.818	0.111	1	0.411	1	0.264	1	0.637	1	disassembly of cell structures during apoptosis	P
GO:0006928	513	0.678	1	0.39	1	0.182	1	0.188	1	0.801	1	0.607	1	0.616	1	0.243	1	cell motility	P
GO:0006929	12	0.402	1	0.132	1	0.437	1	0.0351	1	0.42	1	0.383	1	0.308	1	0.123	1	substrate-bound cell migration	P
GO:0006935	198	0.658	1	0.197	1	0.52	1	0.179	1	0.679	1	0.183	1	0.572	1	0.542	1	chemotaxis	P
GO:0006936	149	0.764	1	0.778	1	0.2	1	0.723	1	0.885	1	0.555	1	0.686	1	0.965	1	muscle contraction	P
GO:0006937	42	0.713	1	0.788	1	0.159	1	0.94	1	0.95	1	0.585	1	0.376	1	0.528	1	regulation of muscle contraction	P
GO:0006939	32	0.922	1	0.896	1	0.267	1	0.731	1	0.995	1	0.909	1	0.622	1	0.565	1	smooth muscle contraction	P
GO:0006940	20	0.763	1	0.933	1	0.115	1	0.977	1	0.963	1	0.884	1	0.682	1	0.41	1	regulation of smooth muscle contraction	P
GO:0006941	39	0.977	1	0.556	1	0.794	1	0.248	1	0.975	1	0.453	1	0.909	1	0.98	1	striated muscle contraction	P
GO:0006942	11	0.994	1	0.599	1	0.944	1	0.253	1	0.96	1	0.606	1	0.896	1	0.876	1	regulation of striated muscle contraction	P
GO:0006944	42	0.0395	1	0.155	1	0.16	1	0.223	1	0.117	1	0.266	1	0.0257	1	0.0858	1	membrane fusion	P
GO:0006950	1460	1.72e-07	0.00195	3.39e-08	0.00497	2.42e-06	0.00242	1.34e-07	0.00196	8.25e-07	0.00245	6.84e-07	0.00297	0.0689	1	0.0356	1	response to stress	P
GO:0006952	710	0.998	1	0.786	1	0.999	1	0.878	1	0.996	1	0.593	1	0.651	1	0.781	1	defense response	P
GO:0006953	31	0.979	1	0.998	1	0.97	1	0.873	1	0.993	1	0.995	1	0.218	1	0.99	1	acute-phase response	P
GO:0006954	374	0.995	1	0.613	1	0.934	1	0.598	1	0.998	1	0.544	1	0.674	1	0.699	1	inflammatory response	P
GO:0006955	736	0.996	1	0.969	1	0.997	1	0.984	1	0.988	1	0.933	1	0.718	1	0.833	1	immune response	P
GO:0006956	36	0.993	1	0.864	1	0.991	1	0.852	1	0.973	1	0.78	1	0.92	1	0.629	1	complement activation	P
GO:0006957	14	0.587	1	0.344	1	0.49	1	0.703	1	0.508	1	0.229	1	0.979	1	0.628	1	complement activation, alternative pathway	P
GO:0006958	27	0.989	1	0.827	1	0.995	1	0.684	1	0.956	1	0.731	1	0.838	1	0.826	1	complement activation, classical pathway	P
GO:0006959	76	0.962	1	0.944	1	0.978	1	0.991	1	0.862	1	0.894	1	0.981	1	0.449	1	humoral immune response	P
GO:0006968	60	0.735	1	0.124	1	0.385	1	0.222	1	0.901	1	0.204	1	0.598	1	0.139	1	cellular defense response	P
GO:0006970	13	0.209	1	0.113	1	0.253	1	0.0612	1	0.241	1	0.274	1	0.116	1	0.0505	1	response to osmotic stress	P
GO:0006974	365	3.93e-11	0	9.9e-10	0	2.36e-06	0.00242	8.67e-08	0.000971	1.18e-09	0.000964	1.21e-08	0.000837	0.0026	0.195	0.0509	1	response to DNA damage stimulus	P
GO:0006979	122	0.0383	1	0.0344	1	0.0947	1	0.0389	1	0.0176	1	0.104	1	0.59	1	0.0578	1	response to oxidative stress	P
GO:0006984	26	0.0298	1	0.000735	0.069	0.0359	1	0.0447	1	0.0378	1	0.000763	0.0549	0.317	1	0.347	1	ER-nuclear signaling pathway	P
GO:0006986	74	9.34e-05	0.0124	2.89e-05	0.00958	0.0295	1	0.136	1	4.32e-05	0.00635	4.5e-06	0.004	0.0621	1	0.114	1	response to unfolded protein	P
GO:0006996	1247	7.19e-22	0	1.39e-21	0	7.48e-11	0.000934	1.42e-07	0.00196	5.29e-21	0	1.22e-19	0	1.21e-05	0.00544	1.57e-09	0.000771	organelle organization and biogenesis	P
GO:0006997	13	0.00304	0.239	0.116	1	0.117	1	0.0969	1	0.00797	0.539	0.294	1	0.00828	0.63	0.201	1	nuclear organization and biogenesis	P
GO:0007001	437	7.37e-11	0	1.7e-13	0	0.000894	0.0756	0.00475	0.346	1.23e-11	0	8.7e-14	0	0.00181	0.195	3.85e-07	0.00188	chromosome organization and biogenesis (sensu Eukaryota)	P
GO:0007004	13	0.279	1	0.86	1	0.317	1	0.879	1	0.326	1	0.889	1	0.459	1	0.47	1	telomere maintenance via telomerase	P
GO:0007005	44	0.00222	0.202	1.23e-05	0.00958	0.0254	1	0.00121	0.115	0.000482	0.022	8.75e-05	0.017	0.524	1	0.0315	1	mitochondrion organization and biogenesis	P
GO:0007006	21	0.0237	1	0.00207	0.129	0.217	1	0.039	1	0.00476	0.418	0.00375	0.27	0.553	1	0.352	1	mitochondrial membrane organization and biogenesis	P
GO:0007009	19	0.767	1	0.31	1	0.718	1	0.788	1	0.882	1	0.118	1	0.212	1	0.864	1	plasma membrane organization and biogenesis	P
GO:0007010	540	5.67e-06	0.007	3.67e-05	0.00958	5.66e-05	0.012	0.00202	0.124	1.68e-05	0.00419	0.000107	0.017	0.0526	1	0.0225	1	cytoskeleton organization and biogenesis	P
GO:0007015	50	0.0423	1	0.155	1	0.00945	0.46	0.644	1	0.0903	1	0.0693	1	0.246	1	0.268	1	actin filament organization	P
GO:0007017	220	1.5e-05	0.008	0.00719	0.36	0.000472	0.036	0.0441	1	8.61e-05	0.017	0.0122	0.739	0.00429	0.357	0.165	1	microtubule-based process	P
GO:0007018	112	0.000193	0.025	0.029	1	0.0143	0.693	0.0409	1	0.00014	0.017	0.0287	1	0.015	0.647	0.763	1	microtubule-based movement	P
GO:0007019	17	0.096	1	0.702	1	0.00654	0.46	0.57	1	0.15	1	0.553	1	0.674	1	0.84	1	microtubule depolymerization	P
GO:0007026	16	0.129	1	0.733	1	0.00544	0.419	0.544	1	0.227	1	0.509	1	0.593	1	0.999	1	negative regulation of microtubule depolymerization	P
GO:0007028	133	3.35e-05	0.01	0.00947	0.518	0.00243	0.248	0.0716	1	6.79e-05	0.017	0.0454	1	0.0393	1	0.0325	1	cytoplasm organization and biogenesis	P
GO:0007030	14	0.128	1	0.29	1	0.0185	1	0.0111	0.818	0.386	1	0.379	1	0.384	1	0.823	1	Golgi organization and biogenesis	P
GO:0007031	22	0.0176	1	0.13	1	0.0495	1	0.267	1	0.0351	1	0.0723	1	0.101	1	0.306	1	peroxisome organization and biogenesis	P
GO:0007033	35	0.0792	1	0.301	1	0.0695	1	0.585	1	0.0662	1	0.293	1	0.886	1	0.506	1	vacuole organization and biogenesis	P
GO:0007034	23	0.121	1	0.124	1	0.0847	1	0.0341	1	0.137	1	0.449	1	0.625	1	0.45	1	vacuolar transport	P
GO:0007040	33	0.0306	1	0.202	1	0.0352	1	0.573	1	0.0251	1	0.192	1	0.888	1	0.401	1	lysosome organization and biogenesis	P
GO:0007041	15	0.23	1	0.545	1	0.075	1	0.203	1	0.298	1	0.75	1	0.875	1	0.69	1	lysosomal transport	P
GO:0007043	14	0.336	1	0.25	1	0.232	1	0.344	1	0.404	1	0.323	1	0.399	1	0.107	1	intercellular junction assembly	P
GO:0007046	71	0.00564	0.35	0.106	1	0.0887	1	0.325	1	0.00441	0.36	0.228	1	0.139	1	0.108	1	ribosome biogenesis	P
GO:0007049	850	3.39e-22	0	1.79e-25	0	4.02e-08	0.000968	9.1e-15	0	1.18e-21	0	2.29e-20	0	2.12e-06	0.00195	2.91e-10	0.000771	cell cycle	P
GO:0007050	92	0.0515	1	0.00393	0.197	0.0837	1	0.0477	1	0.107	1	0.00304	0.239	0.0926	1	0.0854	1	cell cycle arrest	P
GO:0007051	30	0.00282	0.239	0.0241	1	0.0176	0.693	0.414	1	0.00389	0.285	0.0132	0.739	0.0661	1	0.096	1	spindle organization and biogenesis	P
GO:0007052	12	0.00684	0.517	0.0181	1	0.0214	1	0.0597	1	0.00703	0.539	0.0454	1	0.535	1	0.16	1	mitotic spindle organization and biogenesis	P
GO:0007059	66	0.0113	0.667	0.000592	0.069	0.205	1	0.00875	0.713	0.019	1	0.0159	0.763	0.114	1	0.000218	0.027	chromosome segregation	P
GO:0007062	10	0.929	1	0.165	1	0.931	1	0.0938	1	0.744	1	0.185	1	0.998	1	0.435	1	sister chromatid cohesion	P
GO:0007067	220	3.92e-09	0.000806	5.6e-12	0	0.00136	0.098	1.6e-10	0	2.07e-08	0.000964	3.72e-08	0.000837	0.000634	0.065	4.01e-06	0.00188	mitosis	P
GO:0007076	17	0.00773	0.634	0.0138	0.747	0.366	1	0.00665	0.453	0.0181	1	0.202	1	0.0221	1	0.00795	0.481	mitotic chromosome condensation	P
GO:0007088	65	0.00854	0.634	0.00163	0.091	0.056	1	0.0068	0.453	0.00603	0.539	0.0082	0.739	0.62	1	0.00475	0.36	regulation of mitosis	P
GO:0007090	10	0.282	1	0.288	1	0.431	1	0.547	1	0.261	1	0.353	1	0.475	1	0.065	1	regulation of S phase of mitotic cell cycle	P
GO:0007091	10	0.0268	1	0.0284	1	0.11	1	0.0453	1	0.168	1	0.0503	1	0.000631	0.065	0.0474	1	mitotic metaphase/anaphase transition	P
GO:0007093	20	0.469	1	0.345	1	0.373	1	0.349	1	0.477	1	0.486	1	0.947	1	0.419	1	mitotic checkpoint	P
GO:0007096	12	0.00268	0.239	0.0919	1	0.0383	1	0.0642	1	0.00038	0.022	0.167	1	0.759	1	0.066	1	regulation of exit from mitosis	P
GO:0007098	14	0.0699	1	0.112	1	0.156	1	0.169	1	0.0562	1	0.145	1	0.373	1	0.173	1	centrosome cycle	P
GO:0007126	86	0.031	1	0.00113	0.091	0.0751	1	0.0138	0.818	0.0304	1	0.00235	0.164	0.552	1	0.0621	1	meiosis	P
GO:0007127	37	0.0442	1	0.00223	0.177	0.0384	1	0.0471	1	0.0459	1	0.00177	0.161	0.752	1	0.119	1	meiosis I	P
GO:0007131	20	0.131	1	0.0104	0.518	0.128	1	0.129	1	0.0923	1	0.029	1	0.96	1	0.282	1	meiotic recombination	P
GO:0007154	4345	0.983	1	0.081	1	0.768	1	0.246	1	0.967	1	0.0335	1	0.986	1	0.458	1	cell communication	P
GO:0007155	849	0.996	1	0.409	1	0.948	1	0.655	1	0.995	1	0.339	1	0.88	1	0.314	1	cell adhesion	P
GO:0007156	122	1	1	1	1	1	1	1	1	1	1	1	1	0.968	1	0.978	1	homophilic cell adhesion	P
GO:0007157	44	0.339	1	0.29	1	0.468	1	0.675	1	0.342	1	0.114	1	0.186	1	0.874	1	heterophilic cell adhesion	P
GO:0007159	24	0.172	1	0.221	1	0.348	1	0.923	1	0.144	1	0.095	1	0.175	1	0.688	1	leukocyte adhesion	P
GO:0007160	117	0.36	1	0.099	1	0.356	1	0.159	1	0.339	1	0.124	1	0.578	1	0.273	1	cell-matrix adhesion	P
GO:0007162	19	0.179	1	0.0631	1	0.269	1	0.209	1	0.174	1	0.0639	1	0.376	1	0.133	1	negative regulation of cell adhesion	P
GO:0007163	37	0.0652	1	0.00796	0.36	0.0266	1	0.0217	1	0.147	1	0.0317	1	0.173	1	0.0166	0.849	establishment and/or maintenance of cell polarity	P
GO:0007165	3953	0.974	1	0.164	1	0.678	1	0.346	1	0.963	1	0.124	1	0.971	1	0.243	1	signal transduction	P
GO:0007166	2173	1	1	1	1	1	1	1	1	1	1	1	1	1	1	0.999	1	cell surface receptor linked signal transduction	P
GO:0007167	353	0.368	1	0.143	1	0.143	1	0.098	1	0.4	1	0.316	1	0.741	1	0.207	1	enzyme linked receptor protein signaling pathway	P
GO:0007169	232	0.301	1	0.0596	1	0.0913	1	0.179	1	0.403	1	0.126	1	0.659	1	0.0743	1	transmembrane receptor protein tyrosine kinase signaling pathway	P
GO:0007172	16	0.207	1	0.0707	1	0.0371	1	0.147	1	0.33	1	0.0561	1	0.93	1	0.539	1	signal complex formation	P
GO:0007173	34	0.227	1	0.000388	0.069	0.0111	0.532	0.0102	0.713	0.711	1	0.00201	0.161	0.536	1	0.00268	0.185	epidermal growth factor receptor signaling pathway	P
GO:0007178	109	0.473	1	0.505	1	0.558	1	0.0804	1	0.358	1	0.782	1	0.691	1	0.455	1	transmembrane receptor protein serine/threonine kinase signaling pathway	P
GO:0007179	65	0.175	1	0.108	1	0.457	1	0.00559	0.346	0.0778	1	0.347	1	0.666	1	0.434	1	transforming growth factor beta receptor signaling pathway	P
GO:0007186	1459	1	1	1	1	1	1	1	1	1	1	1	1	1	1	1	1	G-protein coupled receptor protein signaling pathway	P
GO:0007187	127	1	1	0.999	1	0.999	1	0.991	1	0.998	1	1	1	0.963	1	0.87	1	G-protein signaling, coupled to cyclic nucleotide second messenger	P
GO:0007188	96	0.998	1	0.973	1	0.999	1	0.925	1	0.979	1	0.985	1	0.981	1	0.553	1	G-protein signaling, coupled to cAMP nucleotide second messenger	P
GO:0007189	44	0.971	1	0.831	1	0.807	1	0.445	1	0.981	1	0.956	1	0.799	1	0.204	1	G-protein signaling, adenylate cyclase activating pathway	P
GO:0007190	25	0.639	1	0.601	1	0.518	1	0.231	1	0.721	1	0.832	1	0.408	1	0.211	1	adenylate cyclase activation	P
GO:0007193	21	0.958	1	0.569	1	1	1	0.728	1	0.777	1	0.564	1	0.683	1	0.282	1	G-protein signaling, adenylate cyclase inhibiting pathway	P
GO:0007194	16	1	1	0.98	1	1	1	0.998	1	0.999	1	0.88	1	1	1	0.987	1	negative regulation of adenylate cyclase activity	P
GO:0007200	80	0.946	1	0.983	1	0.487	1	0.994	1	0.983	1	0.924	1	0.661	1	0.9	1	G-protein signaling, coupled to IP3 second messenger (phospholipase C activating)	P
GO:0007202	16	0.493	1	0.189	1	0.241	1	0.3	1	0.809	1	0.163	1	0.108	1	0.359	1	phospholipase C activation	P
GO:0007204	76	0.654	1	0.731	1	0.575	1	0.774	1	0.621	1	0.555	1	0.511	1	0.936	1	elevation of cytosolic calcium ion concentration	P
GO:0007205	28	0.742	1	0.653	1	0.191	1	0.959	1	0.756	1	0.333	1	0.974	1	0.763	1	protein kinase C activation	P
GO:0007212	11	0.956	1	0.28	1	1	1	0.412	1	0.631	1	0.345	1	0.906	1	0.151	1	dopamine receptor signaling pathway	P
GO:0007214	30	0.993	1	1	1	0.982	1	0.994	1	0.986	1	1	1	0.898	1	0.999	1	gamma-aminobutyric acid signaling pathway	P
GO:0007215	22	0.893	1	0.881	1	0.568	1	0.844	1	0.922	1	0.84	1	0.694	1	0.705	1	glutamate signaling pathway	P
GO:0007218	96	0.905	1	0.641	1	0.943	1	0.311	1	0.828	1	0.491	1	0.856	1	0.958	1	neuropeptide signaling pathway	P
GO:0007219	53	0.368	1	0.129	1	0.141	1	0.272	1	0.358	1	0.161	1	0.986	1	0.117	1	Notch signaling pathway	P
GO:0007223	21	0.875	1	0.787	1	0.935	1	0.773	1	0.581	1	0.674	1	1	1	0.695	1	frizzled-2 signaling pathway	P
GO:0007224	25	0.552	1	0.385	1	0.616	1	0.705	1	0.549	1	0.411	1	0.506	1	0.245	1	smoothened signaling pathway	P
GO:0007229	62	0.446	1	0.2	1	0.487	1	0.239	1	0.508	1	0.238	1	0.311	1	0.81	1	integrin-mediated signaling pathway	P
GO:0007242	1451	2.1e-07	0.00195	2.08e-11	0	3.69e-06	0.00266	1.01e-06	0.002	1.56e-06	0.0026	1.63e-10	0	0.0179	0.911	0.000557	0.0916	intracellular signaling cascade	P
GO:0007243	450	3.39e-05	0.01	6.45e-08	0.00497	0.00413	0.327	5.27e-05	0.008	3.61e-05	0.005	5.12e-07	0.00297	0.0205	0.911	0.00209	0.14	protein kinase cascade	P
GO:0007249	149	0.00178	0.202	0.000457	0.069	0.0347	1	0.015	0.818	0.00509	0.418	0.000499	0.041	0.00421	0.357	0.136	1	I-kappaB kinase/NF-kappaB cascade	P
GO:0007250	13	0.453	1	0.241	1	0.872	1	0.236	1	0.553	1	0.251	1	0.0535	1	0.369	1	activation of NF-kappaB-inducing kinase	P
GO:0007254	76	0.014	0.667	0.0419	1	0.0454	1	0.0304	1	0.0104	0.539	0.191	1	0.385	1	0.00607	0.36	JNK cascade	P
GO:0007257	22	0.167	1	0.051	1	0.0811	1	0.0385	1	0.182	1	0.0776	1	0.955	1	0.224	1	activation of JNK activity	P
GO:0007259	53	0.0581	1	0.0767	1	0.0938	1	0.158	1	0.126	1	0.0711	1	0.0445	1	0.35	1	JAK-STAT cascade	P
GO:0007260	25	0.142	1	0.334	1	0.0524	1	0.119	1	0.212	1	0.501	1	0.33	1	0.665	1	tyrosine phosphorylation of STAT protein	P
GO:0007263	12	0.936	1	0.986	1	0.852	1	0.901	1	0.911	1	0.98	1	0.312	1	0.934	1	nitric oxide mediated signal transduction	P
GO:0007264	458	3.95e-06	0.007	7.76e-08	0.00497	4.81e-06	0.00266	0.000121	0.013	4.29e-05	0.00635	9.13e-07	0.00297	0.0453	1	0.000332	0.027	small GTPase mediated signal transduction	P
GO:0007265	66	0.013	0.667	0.00102	0.091	0.0351	1	0.00869	0.713	0.0149	1	0.00159	0.161	0.14	1	0.0227	1	Ras protein signal transduction	P
GO:0007266	110	0.14	1	0.0658	1	0.155	1	0.267	1	0.105	1	0.12	1	0.639	1	0.0388	1	Rho protein signal transduction	P
GO:0007267	651	0.994	1	0.966	1	0.882	1	0.682	1	0.989	1	0.934	1	0.969	1	0.998	1	cell-cell signaling	P
GO:0007268	316	0.938	1	0.682	1	0.884	1	0.164	1	0.814	1	0.725	1	0.969	1	0.952	1	synaptic transmission	P
GO:0007269	60	0.983	1	0.986	1	0.916	1	0.91	1	0.983	1	0.991	1	0.913	1	0.879	1	neurotransmitter secretion	P
GO:0007270	48	0.749	1	0.928	1	0.63	1	0.764	1	0.634	1	0.944	1	0.845	1	0.805	1	nerve-nerve synaptic transmission	P
GO:0007271	19	0.403	1	0.431	1	0.282	1	0.338	1	0.359	1	0.479	1	0.932	1	0.476	1	synaptic transmission, cholinergic	P
GO:0007272	39	0.0887	1	0.249	1	0.0187	1	0.191	1	0.336	1	0.244	1	0.146	1	0.686	1	ensheathment of neurons	P
GO:0007274	15	0.743	1	0.811	1	0.527	1	0.801	1	0.697	1	0.742	1	0.912	1	0.917	1	neuromuscular synaptic transmission	P
GO:0007275	2975	0.614	1	0.384	1	0.295	1	0.199	1	0.596	1	0.458	1	0.832	1	0.408	1	development	P
GO:0007276	336	0.0662	1	0.0264	1	0.542	1	0.064	1	0.105	1	0.0108	0.739	0.00274	0.195	0.715	1	gametogenesis	P
GO:0007281	40	0.278	1	0.176	1	0.414	1	0.148	1	0.322	1	0.117	1	0.228	1	0.723	1	germ cell development	P
GO:0007283	265	0.0217	1	0.0214	1	0.215	1	0.0272	1	0.0438	1	0.0143	0.739	0.00504	0.357	0.741	1	spermatogenesis	P
GO:0007286	40	0.0877	1	0.0414	1	0.175	1	0.0537	1	0.0853	1	0.091	1	0.431	1	0.159	1	spermatid development	P
GO:0007292	47	0.158	1	0.218	1	0.53	1	0.337	1	0.171	1	0.279	1	0.0573	1	0.154	1	female gamete generation	P
GO:0007338	68	0.527	1	0.927	1	0.606	1	0.869	1	0.618	1	0.959	1	0.305	1	0.401	1	fertilization (sensu Metazoa)	P
GO:0007339	17	0.34	1	0.203	1	0.249	1	0.0533	1	0.46	1	0.322	1	0.455	1	0.815	1	binding of sperm to zona pellucida	P
GO:0007340	14	0.566	1	0.525	1	0.546	1	0.493	1	0.604	1	0.632	1	0.554	1	0.359	1	acrosome reaction	P
GO:0007342	10	0.791	1	0.889	1	1	1	0.967	1	0.691	1	0.991	1	0.428	1	0.0837	1	fusion of sperm to egg plasma membrane	P
GO:0007346	42	0.0811	1	0.0308	1	0.383	1	0.529	1	0.0694	1	0.0231	1	0.326	1	0.071	1	regulation of progression through mitotic cell cycle	P
GO:0007368	33	0.797	1	0.209	1	0.987	1	0.441	1	0.705	1	0.199	1	0.446	1	0.169	1	determination of left/right symmetry	P
GO:0007369	55	0.0879	1	0.253	1	0.144	1	0.907	1	0.104	1	0.251	1	0.426	1	0.0487	1	gastrulation	P
GO:0007379	11	1	1	1	1	0.814	1	1	1	0.996	1	1	1	1	1	0.969	1	segment specification	P
GO:0007389	217	1	1	1	1	1	1	1	1	1	1	1	1	1	1	0.991	1	pattern specification	P
GO:0007398	198	1	1	1	1	0.988	1	1	1	1	1	1	1	0.999	1	0.997	1	ectoderm development	P
GO:0007399	888	1	1	1	1	0.993	1	0.995	1	1	1	1	1	1	1	0.984	1	nervous system development	P
GO:0007405	23	0.282	1	0.122	1	0.292	1	0.116	1	0.253	1	0.129	1	0.458	1	0.584	1	neuroblast proliferation	P
GO:0007409	174	0.993	1	0.929	1	0.852	1	0.953	1	0.987	1	0.916	1	0.986	1	0.458	1	axonogenesis	P
GO:0007411	91	0.999	1	0.989	1	0.915	1	0.998	1	0.998	1	0.977	1	0.997	1	0.762	1	axon guidance	P
GO:0007416	35	0.631	1	0.346	1	0.445	1	0.0546	1	0.651	1	0.471	1	0.637	1	0.76	1	synaptogenesis	P
GO:0007417	342	1	1	1	1	0.947	1	0.999	1	0.999	1	1	1	1	1	1	1	central nervous system development	P
GO:0007420	226	0.975	1	0.997	1	0.715	1	0.952	1	0.975	1	0.992	1	0.986	1	0.999	1	brain development	P
GO:0007422	36	0.59	1	0.993	1	0.382	1	0.967	1	0.627	1	0.98	1	0.402	1	0.994	1	peripheral nervous system development	P
GO:0007423	141	0.983	1	1	1	0.88	1	0.954	1	0.95	1	1	1	0.997	1	0.911	1	sensory organ development	P
GO:0007431	11	0.722	1	0.998	1	0.988	1	0.974	1	0.413	1	0.991	1	0.875	1	0.767	1	salivary gland development	P
GO:0007492	12	0.993	1	0.989	1	0.988	1	0.999	1	0.99	1	0.985	1	0.983	1	0.78	1	endoderm development	P
GO:0007498	64	0.226	1	0.555	1	0.322	1	0.924	1	0.169	1	0.515	1	0.803	1	0.235	1	mesoderm development	P
GO:0007507	139	0.384	1	0.368	1	0.65	1	0.209	1	0.389	1	0.439	1	0.105	1	0.304	1	heart development	P
GO:0007512	13	0.959	1	0.988	1	0.902	1	0.935	1	0.978	1	0.948	1	0.535	1	0.984	1	adult heart development	P
GO:0007517	238	0.265	1	0.212	1	0.142	1	0.147	1	0.346	1	0.181	1	0.355	1	0.59	1	muscle development	P
GO:0007519	147	0.216	1	0.143	1	0.121	1	0.254	1	0.315	1	0.0889	1	0.389	1	0.455	1	striated muscle development	P
GO:0007528	25	0.128	1	0.0434	1	0.132	1	0.0476	1	0.201	1	0.0457	1	0.287	1	0.246	1	neuromuscular junction development	P
GO:0007530	25	0.361	1	0.843	1	0.366	1	0.692	1	0.42	1	0.808	1	0.262	1	0.65	1	sex determination	P
GO:0007548	104	0.707	1	0.749	1	0.528	1	0.761	1	0.642	1	0.591	1	0.891	1	0.825	1	sex differentiation	P
GO:0007565	73	0.873	1	1	1	0.642	1	0.982	1	0.955	1	1	1	0.191	1	0.887	1	pregnancy	P
GO:0007566	16	0.0732	1	0.571	1	0.103	1	0.722	1	0.181	1	0.491	1	0.142	1	0.452	1	embryo implantation	P
GO:0007568	44	0.0936	1	0.0986	1	0.266	1	0.346	1	0.0593	1	0.0634	1	0.329	1	0.192	1	aging	P
GO:0007569	20	0.148	1	0.0707	1	0.231	1	0.191	1	0.113	1	0.0519	1	0.23	1	0.226	1	cell aging	P
GO:0007582	13042	0	0	0	0	3.17e-34	0	0	0	0	0	0	0	1.22e-21	0	1.89e-31	0	physiological process	P
GO:0007584	55	0.0277	1	0.00181	0.091	0.753	1	0.309	1	0.00636	0.539	0.000693	0.0549	0.162	1	0.0363	1	response to nutrient	P
GO:0007585	40	0.894	1	0.99	1	0.818	1	0.989	1	0.815	1	0.973	1	0.96	1	0.873	1	respiratory gaseous exchange	P
GO:0007586	86	0.412	1	0.956	1	0.312	1	0.514	1	0.505	1	0.999	1	0.201	1	0.23	1	digestion	P
GO:0007588	49	0.731	1	0.627	1	0.262	1	0.193	1	0.796	1	0.701	1	0.833	1	0.836	1	excretion	P
GO:0007595	20	0.99	1	0.914	1	1	1	0.81	1	0.977	1	0.867	1	0.159	1	0.908	1	lactation	P
GO:0007596	148	0.899	1	0.587	1	0.754	1	0.343	1	0.816	1	0.578	1	0.971	1	0.819	1	blood coagulation	P
GO:0007599	154	0.821	1	0.515	1	0.634	1	0.249	1	0.715	1	0.538	1	0.97	1	0.781	1	hemostasis	P
GO:0007600	771	1	1	1	1	1	1	1	1	1	1	1	1	1	1	1	1	sensory perception	P
GO:0007601	218	0.68	1	0.36	1	0.317	1	0.168	1	0.773	1	0.381	1	0.799	1	0.39	1	visual perception	P
GO:0007602	30	0.419	1	0.225	1	0.153	1	0.535	1	0.341	1	0.0955	1	1	1	0.597	1	phototransduction	P
GO:0007605	147	0.97	1	0.972	1	0.83	1	0.954	1	0.96	1	0.943	1	0.918	1	0.962	1	sensory perception of sound	P
GO:0007606	391	1	1	1	1	1	1	1	1	1	1	1	1	1	1	1	1	sensory perception of chemical stimulus	P
GO:0007608	354	1	1	1	1	1	1	1	1	1	1	1	1	1	1	1	1	sensory perception of smell	P
GO:0007610	444	0.958	1	0.833	1	0.909	1	0.454	1	0.928	1	0.817	1	0.757	1	0.927	1	behavior	P
GO:0007611	73	0.783	1	0.97	1	0.852	1	0.616	1	0.454	1	0.987	1	0.993	1	0.863	1	learning and/or memory	P
GO:0007612	40	0.804	1	0.993	1	0.543	1	0.716	1	0.743	1	0.994	1	0.969	1	0.868	1	learning	P
GO:0007613	20	0.976	1	0.988	1	0.862	1	0.862	1	0.964	1	0.89	1	0.922	1	0.985	1	memory	P
GO:0007617	14	0.986	1	0.944	1	0.918	1	0.924	1	0.989	1	0.932	1	0.535	1	0.411	1	mating behavior	P
GO:0007623	33	0.677	1	0.588	1	0.722	1	0.505	1	0.559	1	0.481	1	0.724	1	0.861	1	circadian rhythm	P
GO:0007626	280	0.721	1	0.373	1	0.703	1	0.267	1	0.696	1	0.414	1	0.425	1	0.441	1	locomotory behavior	P
GO:0007628	17	0.399	1	0.892	1	0.405	1	0.379	1	0.381	1	0.989	1	0.607	1	0.475	1	adult walking behavior	P
GO:0007631	48	0.535	1	0.706	1	0.741	1	0.355	1	0.475	1	0.785	1	0.206	1	0.598	1	feeding behavior	P
GO:0007632	21	0.602	1	0.982	1	0.224	1	0.768	1	0.665	1	0.981	1	0.775	1	0.451	1	visual behavior	P
GO:0008009	53	0.878	1	0.911	1	0.697	1	0.588	1	0.929	1	0.811	1	0.611	1	1	1	chemokine activity	F
GO:0008013	14	0.00125	0.202	0.00473	0.36	0.0465	1	0.0426	1	0.00548	0.418	0.0512	1	0.0509	1	0.0376	1	beta-catenin binding	F
GO:0008015	185	1	1	0.999	1	0.976	1	0.987	1	0.999	1	0.997	1	0.92	1	0.995	1	circulation	P
GO:0008016	55	0.999	1	1	1	0.976	1	1	1	0.991	1	0.998	1	0.998	1	0.999	1	regulation of heart contraction	P
GO:0008017	56	0.00151	0.202	0.00183	0.091	0.0041	0.327	0.00401	0.241	0.00342	0.285	0.0048	0.27	0.0579	1	0.276	1	microtubule binding	F
GO:0008021	75	0.21	1	0.333	1	0.091	1	0.223	1	0.237	1	0.296	1	0.658	1	0.838	1	synaptic vesicle	C
GO:0008022	102	4.18e-05	0.01	0.000189	0.015	0.00294	0.248	0.00422	0.346	0.00011	0.017	3.21e-05	0.012	0.0074	0.544	0.0984	1	protein C-terminus binding	F
GO:0008023	12	0.102	1	0.314	1	0.184	1	0.733	1	0.12	1	0.223	1	0.136	1	0.479	1	transcription elongation factor complex	C
GO:0008026	103	0.000182	0.025	4.19e-05	0.00958	0.0014	0.098	0.00307	0.147	0.00674	0.539	5.71e-05	0.017	0.00942	0.63	0.0369	1	ATP-dependent helicase activity	F
GO:0008028	20	0.508	1	0.643	1	0.879	1	0.843	1	0.392	1	0.408	1	0.777	1	0.803	1	monocarboxylic acid transporter activity	F
GO:0008033	62	0.00152	0.202	0.00306	0.197	0.0206	1	0.0146	0.818	0.00219	0.285	0.00919	0.739	0.0704	1	0.0851	1	tRNA processing	P
GO:0008034	29	0.0889	1	0.0578	1	0.491	1	0.111	1	0.0406	1	0.0727	1	0.268	1	0.232	1	lipoprotein binding	F
GO:0008037	29	0.995	1	0.774	1	0.995	1	0.831	1	0.972	1	0.669	1	0.99	1	0.734	1	cell recognition	P
GO:0008038	17	0.985	1	0.988	1	0.998	1	0.998	1	0.904	1	0.971	1	0.989	1	0.805	1	neuron recognition	P
GO:0008045	11	0.941	1	0.994	1	0.965	1	0.994	1	0.863	1	0.999	1	0.913	1	0.28	1	motor axon guidance	P
GO:0008047	355	5.8e-05	0.011	1.12e-05	0.00958	0.00169	0.248	0.00126	0.115	0.000278	0.017	0.000311	0.0307	0.0588	1	0.000883	0.0916	enzyme activator activity	F
GO:0008060	31	0.00992	0.667	0.174	1	0.0141	0.693	0.389	1	0.0107	0.539	0.205	1	0.366	1	0.192	1	ARF GTPase activator activity	F
GO:0008064	56	0.00825	0.634	0.0781	1	0.0193	1	0.288	1	0.00858	0.539	0.0776	1	0.574	1	0.191	1	regulation of actin polymerization and/or depolymerization	P
GO:0008066	49	1	1	0.998	1	1	1	0.995	1	1	1	0.972	1	0.764	1	0.99	1	glutamate receptor activity	F
GO:0008067	31	0.997	1	0.946	1	0.999	1	0.93	1	0.996	1	0.862	1	0.587	1	0.863	1	metabotropic glutamate, GABA-B-like receptor activity	F
GO:0008076	166	0.582	1	0.817	1	0.281	1	0.981	1	0.803	1	0.651	1	0.288	1	0.583	1	voltage-gated potassium channel complex	C
GO:0008080	59	0.000326	0.0337	0.000228	0.0419	0.021	1	0.19	1	0.000732	0.04	0.000353	0.0307	0.0207	0.911	0.0013	0.0916	N-acetyltransferase activity	F
GO:0008081	88	0.487	1	0.684	1	0.482	1	0.579	1	0.622	1	0.53	1	0.129	1	0.945	1	phosphoric diester hydrolase activity	F
GO:0008083	194	0.957	1	0.993	1	0.971	1	0.978	1	0.863	1	0.98	1	0.908	1	0.967	1	growth factor activity	F
GO:0008088	13	0.139	1	0.0562	1	0.314	1	0.0415	1	0.0968	1	0.053	1	0.208	1	0.324	1	axon cargo transport	P
GO:0008092	476	4.8e-05	0.01	2.51e-08	0.00497	3.43e-06	0.00242	5.83e-05	0.012	0.000331	0.0198	1.69e-07	0.00092	0.66	1	0.00279	0.185	cytoskeletal protein binding	F
GO:0008094	46	0.00571	0.35	0.00235	0.177	0.0311	1	0.117	1	0.0082	0.539	0.0013	0.064	0.224	1	0.424	1	DNA-dependent ATPase activity	F
GO:0008104	965	1.48e-22	0	2.73e-23	0	1.08e-12	0	4e-10	0	1.41e-19	0	7.25e-22	0	4.47e-06	0.002	1.08e-06	0.00188	protein localization	P
GO:0008105	12	0.546	1	0.478	1	0.428	1	0.322	1	0.688	1	0.737	1	0.452	1	0.276	1	asymmetric protein localization	P
GO:0008121	12	0.024	1	0.246	1	0.0293	1	0.253	1	0.0339	1	0.213	1	0.361	1	0.589	1	ubiquinol-cytochrome-c reductase activity	F
GO:0008134	453	1.03e-12	0	1.58e-12	0	3.85e-08	0.000968	5.23e-08	0.000971	2.8e-12	0	2.05e-10	0	0.0192	0.911	0.000416	0.027	transcription factor binding	F
GO:0008135	104	2.85e-07	0.00195	3e-08	0.00497	0.00157	0.248	0.00067	0.047	7.12e-07	0.00245	4.71e-07	0.00297	0.00141	0.168	0.000402	0.027	translation factor activity, nucleic acid binding	F
GO:0008137	45	0.00352	0.273	0.0345	1	0.0659	1	0.129	1	0.00696	0.539	0.0839	1	0.0453	1	0.0789	1	NADH dehydrogenase (ubiquinone) activity	F
GO:0008138	49	0.171	1	0.127	1	0.627	1	0.384	1	0.0574	1	0.0796	1	0.888	1	0.31	1	protein tyrosine/serine/threonine phosphatase activity	F
GO:0008144	24	0.159	1	0.49	1	0.366	1	0.594	1	0.472	1	0.443	1	0.014	0.647	0.378	1	drug binding	F
GO:0008146	47	0.517	1	0.553	1	0.145	1	0.7	1	0.59	1	0.572	1	0.787	1	0.251	1	sulfotransferase activity	F
GO:0008150	14949	0	0	0	0	3.79e-29	0	4.4e-39	0	0	0	0	0	6.79e-21	0	3.85e-28	0	biological_process	P
GO:0008152	8837	0	0	0	0	6.29e-43	0	0	0	0	0	0	0	1.59e-27	0	0	0	metabolism	P
GO:0008154	74	0.0166	0.667	0.105	1	0.0275	1	0.214	1	0.0292	1	0.114	1	0.407	1	0.185	1	actin polymerization and/or depolymerization	P
GO:0008156	18	3.86e-06	0.007	0.00633	0.36	0.000647	0.036	0.109	1	0.000719	0.04	0.00294	0.239	0.0149	0.647	0.0401	1	negative regulation of DNA replication	P
GO:0008168	181	5.14e-09	0.000806	1.39e-05	0.00958	0.00042	0.036	0.00687	0.453	9.77e-09	0.000964	9.65e-05	0.017	0.00429	0.357	0.00869	0.481	methyltransferase activity	F
GO:0008170	47	0.000732	0.0671	0.00017	0.015	0.119	1	0.00321	0.147	0.000194	0.017	0.000575	0.0549	0.174	1	0.0325	1	N-methyltransferase activity	F
GO:0008172	10	0.223	1	0.768	1	0.0243	1	0.991	1	0.457	1	0.607	1	0.23	1	0.427	1	S-methyltransferase activity	F
GO:0008173	24	0.00579	0.35	0.443	1	0.125	1	0.947	1	0.00267	0.285	0.35	1	0.22	1	0.501	1	RNA methyltransferase activity	F
GO:0008175	11	0.0541	1	0.341	1	0.0202	1	0.776	1	0.0419	1	0.339	1	0.516	1	0.352	1	tRNA methyltransferase activity	F
GO:0008180	10	0.0259	1	0.0874	1	0.106	1	0.426	1	0.0447	1	0.136	1	0.0203	0.911	0.156	1	signalosome complex	C
GO:0008186	20	0.000232	0.0264	0.00272	0.177	0.00708	0.46	0.0144	0.818	0.0145	1	0.00167	0.161	0.0246	1	0.372	1	RNA-dependent ATPase activity	F
GO:0008188	144	0.999	1	1	1	0.974	1	0.995	1	1	1	0.999	1	0.777	1	0.997	1	neuropeptide receptor activity	F
GO:0008191	10	0.793	1	0.939	1	0.38	1	0.768	1	0.719	1	0.97	1	0.808	1	0.635	1	metalloendopeptidase inhibitor activity	F
GO:0008194	107	0.99	1	0.716	1	0.872	1	0.572	1	0.971	1	0.477	1	0.998	1	0.999	1	UDP-glycosyltransferase activity	F
GO:0008199	15	0.99	1	0.618	1	0.899	1	0.672	1	0.994	1	0.503	1	0.479	1	0.991	1	ferric iron binding	F
GO:0008200	11	0.23	1	0.469	1	0.458	1	0.259	1	0.176	1	0.71	1	0.698	1	0.245	1	ion channel inhibitor activity	F
GO:0008201	84	0.876	1	0.952	1	0.369	1	0.899	1	0.903	1	0.889	1	0.874	1	0.883	1	heparin binding	F
GO:0008202	205	0.177	1	0.616	1	0.156	1	0.307	1	0.153	1	0.644	1	0.556	1	0.488	1	steroid metabolism	P
GO:0008203	86	0.0378	1	0.126	1	0.0505	1	0.121	1	0.0509	1	0.227	1	0.281	1	0.082	1	cholesterol metabolism	P
GO:0008206	18	0.0758	1	0.514	1	0.0467	1	0.538	1	0.0795	1	0.355	1	0.726	1	0.949	1	bile acid metabolism	P
GO:0008207	17	0.874	1	0.997	1	0.862	1	1	1	0.782	1	0.977	1	0.881	1	0.998	1	C21-steroid hormone metabolism	P
GO:0008209	10	0.893	1	0.983	1	0.524	1	0.842	1	0.96	1	0.99	1	0.52	1	0.985	1	androgen metabolism	P
GO:0008210	10	1	1	0.872	1	1	1	0.746	1	1	1	0.943	1	0.774	1	0.544	1	estrogen metabolism	P
GO:0008213	28	0.00432	0.328	0.000493	0.069	0.455	1	0.0139	0.818	0.00134	0.078	0.00111	0.0549	0.149	1	0.0311	1	protein amino acid alkylation	P
GO:0008217	70	0.996	1	0.99	1	0.695	1	0.844	1	0.999	1	0.99	1	0.532	1	0.979	1	blood pressure regulation	P
GO:0008219	929	1.99e-09	0.000806	1.06e-14	0	1.08e-07	0.00242	1.77e-09	0	1.99e-07	0.00169	2.37e-11	0	0.000121	0.025	2.68e-07	0.00188	cell death	P
GO:0008227	169	0.0161	0.667	0.102	1	0.00532	0.419	0.148	1	0.0433	1	0.232	1	0.288	1	0.0173	1	amine receptor activity	F
GO:0008233	706	0.047	1	0.000384	0.069	0.0882	1	0.0182	1	0.0663	1	0.00105	0.0549	0.157	1	0.00434	0.36	peptidase activity	F
GO:0008234	175	0.115	1	0.00151	0.091	0.2	1	0.0029	0.147	0.071	1	0.00431	0.27	0.403	1	0.112	1	cysteine-type peptidase activity	F
GO:0008235	57	0.274	1	0.141	1	0.303	1	0.0781	1	0.408	1	0.424	1	0.199	1	0.163	1	metalloexopeptidase activity	F
GO:0008236	234	0.121	1	0.0963	1	0.3	1	0.234	1	0.1	1	0.187	1	0.233	1	0.00932	0.481	serine-type peptidase activity	F
GO:0008237	207	0.758	1	0.247	1	0.159	1	0.389	1	0.92	1	0.307	1	0.779	1	0.233	1	metallopeptidase activity	F
GO:0008238	106	0.242	1	0.237	1	0.398	1	0.213	1	0.331	1	0.347	1	0.113	1	0.267	1	exopeptidase activity	F
GO:0008239	12	0.522	1	0.244	1	0.769	1	0.363	1	0.681	1	0.23	1	0.144	1	0.221	1	dipeptidyl-peptidase activity	F
GO:0008270	2351	1.15e-25	0	4e-36	0	2.36e-11	0	1.41e-12	0	1.14e-24	0	3.77e-35	0	5.01e-07	0.00195	2.82e-11	0	zinc ion binding	F
GO:0008271	10	0.4	1	0.995	1	0.314	1	0.788	1	0.495	1	1	1	0.544	1	0.798	1	sulfate porter activity	F
GO:0008272	15	0.351	1	0.806	1	0.484	1	0.473	1	0.302	1	0.797	1	0.607	1	0.864	1	sulfate transport	P
GO:0008276	42	2.33e-05	0.008	4.83e-06	0.00839	0.0616	1	0.000686	0.047	1.81e-05	0.00419	2.36e-05	0.00763	0.0324	1	0.00857	0.481	protein methyltransferase activity	F
GO:0008277	38	0.225	1	0.324	1	0.0789	1	0.738	1	0.319	1	0.196	1	0.618	1	0.672	1	regulation of G-protein coupled receptor protein signaling pathway	P
GO:0008283	898	0.000762	0.0671	0.00749	0.36	0.0303	1	0.238	1	0.000557	0.04	0.00609	0.351	0.0164	0.663	0.0191	1	cell proliferation	P
GO:0008284	297	0.613	1	0.653	1	0.53	1	0.687	1	0.443	1	0.735	1	0.869	1	0.233	1	positive regulation of cell proliferation	P
GO:0008285	284	0.144	1	0.287	1	0.226	1	0.728	1	0.145	1	0.245	1	0.231	1	0.168	1	negative regulation of cell proliferation	P
GO:0008286	38	0.0772	1	0.0204	1	0.124	1	0.0238	1	0.106	1	0.0563	1	0.369	1	0.259	1	insulin receptor signaling pathway	P
GO:0008287	39	0.108	1	0.000269	0.0419	0.389	1	0.00183	0.124	0.121	1	0.00299	0.239	0.194	1	0.0657	1	protein serine/threonine phosphatase complex	C
GO:0008289	340	3.14e-05	0.01	8.61e-08	0.00497	0.000346	0.036	2.34e-05	0.008	0.000279	0.017	1.38e-06	0.00297	0.0364	1	0.00176	0.14	lipid binding	F
GO:0008299	16	0.822	1	0.29	1	0.641	1	0.151	1	0.852	1	0.281	1	0.717	1	0.889	1	isoprenoid biosynthesis	P
GO:0008301	10	0.365	1	0.997	1	0.655	1	0.898	1	0.295	1	0.952	1	0.399	1	1	1	DNA bending activity	F
GO:0008305	30	0.815	1	0.101	1	0.586	1	0.276	1	0.807	1	0.102	1	0.858	1	0.645	1	integrin complex	C
GO:0008306	11	0.925	1	0.691	1	0.901	1	0.421	1	0.728	1	0.721	1	0.988	1	0.661	1	associative learning	P
GO:0008307	39	0.924	1	0.869	1	0.917	1	0.697	1	0.961	1	0.631	1	0.544	1	1	1	structural constituent of muscle	F
GO:0008312	11	0.185	1	0.254	1	0.101	1	0.942	1	0.244	1	0.276	1	0.311	1	0.0449	1	7S RNA binding	F
GO:0008324	766	0.147	1	0.0755	1	0.173	1	0.181	1	0.131	1	0.0625	1	0.814	1	0.246	1	cation transporter activity	F
GO:0008329	11	0.351	1	0.699	1	1	1	0.635	1	0.158	1	0.596	1	0.755	1	0.969	1	pattern recognition receptor activity	F
GO:0008344	38	0.228	1	0.472	1	0.714	1	0.268	1	0.139	1	0.578	1	0.299	1	0.357	1	adult locomotory behavior	P
GO:0008354	10	0.879	1	0.359	1	0.886	1	0.676	1	0.708	1	0.225	1	0.852	1	0.781	1	germ cell migration	P
GO:0008360	46	0.0789	1	0.00286	0.177	0.0392	1	0.069	1	0.17	1	0.00691	0.53	0.185	1	0.0127	0.647	regulation of cell shape	P
GO:0008361	219	0.133	1	0.0417	1	0.017	0.693	0.00232	0.147	0.176	1	0.168	1	0.723	1	0.215	1	regulation of cell size	P
GO:0008366	39	0.0887	1	0.249	1	0.0187	1	0.191	1	0.336	1	0.244	1	0.146	1	0.686	1	axon ensheathment	P
GO:0008367	10	0.704	1	0.499	1	0.527	1	0.665	1	0.766	1	0.453	1	0.775	1	0.557	1	bacterial binding	F
GO:0008373	20	0.83	1	0.291	1	0.929	1	0.431	1	0.78	1	0.28	1	0.292	1	0.163	1	sialyltransferase activity	F
GO:0008374	37	0.143	1	0.441	1	0.426	1	0.885	1	0.079	1	0.227	1	0.372	1	0.801	1	O-acyltransferase activity	F
GO:0008375	34	0.117	1	0.0266	1	0.399	1	0.14	1	0.0539	1	0.0216	1	0.465	1	0.586	1	acetylglucosaminyltransferase activity	F
GO:0008376	29	1	1	0.999	1	0.99	1	0.958	1	0.996	1	0.988	1	1	1	1	1	acetylgalactosaminyltransferase activity	F
GO:0008378	32	0.638	1	0.205	1	0.401	1	0.538	1	0.746	1	0.0795	1	0.451	1	0.924	1	galactosyltransferase activity	F
GO:0008380	272	2.91e-19	0	5.66e-22	0	4.71e-09	0.000934	3.73e-09	0	5.47e-17	0	9.4e-19	0	4.61e-07	0.00195	6.37e-09	0.000771	RNA splicing	P
GO:0008395	13	1	1	0.997	1	1	1	1	1	0.967	1	0.999	1	0.998	1	0.526	1	steroid hydroxylase activity	F
GO:0008406	74	0.699	1	0.713	1	0.483	1	0.794	1	0.637	1	0.579	1	0.922	1	0.643	1	gonad development	P
GO:0008408	27	0.0386	1	0.334	1	0.0197	1	0.321	1	0.087	1	0.417	1	0.343	1	0.416	1	3'-5' exonuclease activity	F
GO:0008415	189	2.66e-06	0.00195	0.000902	0.069	0.00109	0.098	0.189	1	1.85e-06	0.0026	0.000777	0.0549	0.0266	1	0.0305	1	acyltransferase activity	F
GO:0008417	14	0.124	1	0.19	1	0.459	1	0.331	1	0.095	1	0.213	1	0.412	1	0.0793	1	fucosyltransferase activity	F
GO:0008430	31	0.0278	1	0.0149	1	0.239	1	0.0803	1	0.0209	1	0.0399	1	0.0767	1	0.0335	1	selenium binding	F
GO:0008443	12	0.942	1	0.984	1	0.896	1	0.918	1	0.729	1	0.91	1	1	1	0.998	1	phosphofructokinase activity	F
GO:0008483	22	0.0112	0.667	0.0466	1	0.0146	0.693	0.0782	1	0.0207	1	0.11	1	0.35	1	0.0468	1	transaminase activity	F
GO:0008484	20	0.185	1	0.446	1	0.319	1	0.304	1	0.172	1	0.511	1	0.624	1	0.793	1	sulfuric ester hydrolase activity	F
GO:0008493	27	0.442	1	0.206	1	0.044	1	0.696	1	0.643	1	0.153	1	0.927	1	0.2	1	tetracycline transporter activity	F
GO:0008509	194	0.787	1	0.824	1	0.752	1	0.698	1	0.657	1	0.761	1	0.895	1	0.935	1	anion transporter activity	F
GO:0008514	10	0.988	1	0.981	1	0.923	1	1	1	0.9	1	0.867	1	0.869	1	0.72	1	organic anion transporter activity	F
GO:0008527	10	0.983	1	0.944	1	0.853	1	0.992	1	0.999	1	0.996	1	0.256	1	0.394	1	taste receptor activity	F
GO:0008528	415	1	1	1	1	1	1	1	1	1	1	1	1	1	1	1	1	peptide receptor activity, G-protein coupled	F
GO:0008533	14	0.95	1	0.969	1	0.479	1	0.74	1	0.994	1	0.933	1	0.871	1	0.989	1	astacin activity	F
GO:0008536	10	0.127	1	0.179	1	0.329	1	0.425	1	0.0923	1	0.524	1	0.509	1	0.1	1	Ran GTPase binding	F
GO:0008542	18	0.428	1	0.982	1	0.134	1	0.8	1	0.495	1	0.99	1	0.594	1	0.241	1	visual learning	P
GO:0008543	31	0.809	1	0.991	1	0.49	1	0.981	1	0.766	1	0.906	1	0.923	1	0.934	1	fibroblast growth factor receptor signaling pathway	P
GO:0008544	184	1	1	1	1	0.996	1	1	1	1	1	1	1	0.999	1	0.999	1	epidermis development	P
GO:0008553	10	0.0529	1	0.08	1	0.604	1	0.0764	1	0.0442	1	0.121	1	0.161	1	0.305	1	hydrogen-exporting ATPase activity, phosphorylative mechanism	F
GO:0008565	92	1.64e-08	0.000977	6.17e-09	0.00497	0.000152	0.015	0.00127	0.115	1.47e-07	0.00169	2.78e-08	0.000837	0.00036	0.034	0.0084	0.481	protein transporter activity	F
GO:0008584	31	0.405	1	0.188	1	0.513	1	0.609	1	0.316	1	0.135	1	0.732	1	0.233	1	male gonad development	P
GO:0008585	43	0.572	1	0.767	1	0.295	1	0.783	1	0.616	1	0.72	1	0.835	1	0.5	1	female gonad development	P
GO:0008589	14	0.933	1	0.797	1	0.616	1	0.659	1	0.975	1	0.94	1	0.925	1	0.471	1	regulation of smoothened signaling pathway	P
GO:0008601	23	0.129	1	0.00611	0.36	0.223	1	0.0399	1	0.174	1	0.0106	0.739	0.136	1	0.118	1	protein phosphatase type 2A regulator activity	F
GO:0008603	27	0.999	1	0.998	1	0.996	1	1	1	0.997	1	0.927	1	0.824	1	0.999	1	cAMP-dependent protein kinase regulator activity	F
GO:0008610	311	0.0191	1	0.00364	0.197	0.046	1	0.0125	0.818	0.0523	1	0.00602	0.351	0.0879	1	0.21	1	lipid biosynthesis	P
GO:0008624	45	0.00809	0.634	0.0128	0.747	0.00715	0.46	0.186	1	0.0184	1	0.0254	1	0.27	1	0.00659	0.481	induction of apoptosis by extracellular signals	P
GO:0008625	13	0.0104	0.667	0.0182	1	0.179	1	0.467	1	0.0228	1	0.0332	1	0.034	1	0.000987	0.0916	induction of apoptosis via death domain receptors	P
GO:0008629	44	0.0135	0.667	0.0217	1	0.065	1	0.0101	0.713	0.0231	1	0.0575	1	0.105	1	0.0315	1	induction of apoptosis by intracellular signals	P
GO:0008630	24	0.0783	1	0.0713	1	0.217	1	0.041	1	0.0917	1	0.159	1	0.0847	1	0.0497	1	DNA damage response, signal transduction resulting in induction of apoptosis	P
GO:0008632	106	0.000474	0.0337	2.68e-06	0.00839	0.0211	1	0.00155	0.124	0.000989	0.044	1.65e-05	0.00763	0.00421	0.357	0.000687	0.0916	apoptotic program	P
GO:0008633	21	0.44	1	0.0722	1	0.316	1	0.186	1	0.702	1	0.107	1	0.184	1	0.0648	1	activation of pro-apoptotic gene products	P
GO:0008637	24	0.0287	1	0.0127	0.747	0.135	1	0.0109	0.818	0.0224	1	0.0412	1	0.0635	1	0.0338	1	apoptotic mitochondrial changes	P
GO:0008643	73	0.0161	0.667	0.00559	0.36	0.0619	1	0.0182	1	0.0227	1	0.0258	1	0.0817	1	0.0815	1	carbohydrate transport	P
GO:0008645	43	0.0131	0.667	0.0239	1	0.0337	1	0.0637	1	0.019	1	0.0536	1	0.0756	1	0.125	1	hexose transport	P
GO:0008652	90	0.205	1	0.0527	1	0.234	1	0.0446	1	0.233	1	0.0814	1	0.411	1	0.253	1	amino acid biosynthesis	P
GO:0008654	85	0.0224	1	0.00691	0.36	0.149	1	0.043	1	0.0372	1	0.00589	0.351	0.111	1	0.186	1	phospholipid biosynthesis	P
GO:0008656	15	0.00311	0.239	0.0644	1	0.018	1	0.459	1	0.025	1	0.065	1	0.0476	1	0.0824	1	caspase activator activity	F
GO:0008667	42	0.707	1	0.444	1	0.54	1	0.162	1	0.744	1	0.619	1	0.527	1	0.277	1	2,3-dihydro-2,3-dihydroxybenzoate dehydrogenase activity	F
GO:0008757	76	1.17e-07	0.00185	1.65e-05	0.00958	0.000373	0.036	0.0256	1	2.8e-07	0.00169	4.37e-05	0.012	0.0104	0.63	0.0056	0.36	S-adenosylmethionine-dependent methyltransferase activity	F
GO:0009055	357	0.104	1	0.221	1	0.291	1	0.561	1	0.199	1	0.165	1	0.0107	0.63	0.347	1	electron carrier activity	F
GO:0009056	803	2.67e-14	0	4.63e-19	0	2.09e-08	0.000968	3.4e-11	0	3.25e-11	0	9.62e-16	0	5.01e-06	0.002	6.32e-08	0.00188	catabolism	P
GO:0009057	483	4.76e-14	0	5.95e-18	0	1.75e-08	0.000968	5.89e-10	0	1.24e-10	0	2.2e-15	0	3.46e-06	0.00195	7.62e-07	0.00188	macromolecule catabolism	P
GO:0009058	1572	5.26e-21	0	5.09e-19	0	5.27e-11	0	8.68e-11	0	2.21e-18	0	1.61e-16	0	1.29e-07	0.000855	1.57e-06	0.00188	biosynthesis	P
GO:0009059	927	3.62e-19	0	9.91e-15	0	7.04e-09	0.000934	3.69e-05	0.008	3.52e-17	0	3.89e-14	0	2.19e-07	0.000855	1.13e-06	0.00188	macromolecule biosynthesis	P
GO:0009060	37	0.0488	1	0.0584	1	0.0101	0.46	0.0447	1	0.108	1	0.108	1	0.256	1	0.234	1	aerobic respiration	P
GO:0009063	61	0.0212	1	0.00618	0.36	0.0906	1	0.0451	1	0.0324	1	0.00403	0.27	0.112	1	0.39	1	amino acid catabolism	P
GO:0009064	50	0.0147	0.667	0.038	1	0.314	1	0.35	1	0.00769	0.539	0.0131	0.739	0.154	1	0.358	1	glutamine family amino acid metabolism	P
GO:0009065	16	0.127	1	0.0784	1	0.342	1	0.235	1	0.116	1	0.0632	1	0.186	1	0.316	1	glutamine family amino acid catabolism	P
GO:0009066	26	0.412	1	0.36	1	0.684	1	0.218	1	0.199	1	0.36	1	0.865	1	0.88	1	aspartate family amino acid metabolism	P
GO:0009067	14	0.393	1	0.337	1	0.565	1	0.329	1	0.22	1	0.374	1	0.974	1	0.704	1	aspartate family amino acid biosynthesis	P
GO:0009069	26	0.0551	1	0.0391	1	0.104	1	0.0744	1	0.0651	1	0.0196	1	0.237	1	0.708	1	serine family amino acid metabolism	P
GO:0009070	10	0.217	1	0.188	1	0.0853	1	0.438	1	0.257	1	0.111	1	0.966	1	0.668	1	serine family amino acid biosynthesis	P
GO:0009072	71	0.849	1	0.395	1	0.583	1	0.275	1	0.885	1	0.565	1	0.62	1	0.175	1	aromatic amino acid family metabolism	P
GO:0009073	43	0.762	1	0.514	1	0.596	1	0.198	1	0.781	1	0.675	1	0.57	1	0.315	1	aromatic amino acid family biosynthesis	P
GO:0009074	14	0.294	1	0.347	1	0.221	1	0.926	1	0.468	1	0.228	1	0.19	1	0.398	1	aromatic amino acid family catabolism	P
GO:0009075	12	0.677	1	0.965	1	0.341	1	0.826	1	0.647	1	0.935	1	0.954	1	0.951	1	histidine family amino acid metabolism	P
GO:0009081	13	0.011	0.667	0.0113	0.677	0.0526	1	0.00133	0.115	0.0104	0.539	0.0664	1	0.406	1	0.467	1	branched chain family amino acid metabolism	P
GO:0009084	19	0.0636	1	0.00816	0.36	0.203	1	0.0446	1	0.0757	1	0.0129	0.739	0.107	1	0.0507	1	glutamine family amino acid biosynthesis	P
GO:0009100	153	0.111	1	0.00268	0.177	0.56	1	0.321	1	0.0265	1	0.00079	0.0549	0.748	1	0.0307	1	glycoprotein metabolism	P
GO:0009101	127	0.268	1	0.00724	0.36	0.632	1	0.414	1	0.125	1	0.00161	0.161	0.583	1	0.0579	1	glycoprotein biosynthesis	P
GO:0009108	88	0.000263	0.0337	0.0152	1	0.00361	0.327	0.00341	0.202	0.000581	0.04	0.0907	1	0.0926	1	0.108	1	coenzyme biosynthesis	P
GO:0009109	27	0.0505	1	0.126	1	0.00769	0.46	0.0534	1	0.101	1	0.2	1	0.468	1	0.336	1	coenzyme catabolism	P
GO:0009110	26	0.128	1	0.283	1	0.064	1	0.265	1	0.232	1	0.325	1	0.405	1	0.334	1	vitamin biosynthesis	P
GO:0009112	19	0.00404	0.328	0.0279	1	0.317	1	0.133	1	0.00543	0.418	0.0206	1	0.0121	0.63	0.109	1	nucleobase metabolism	P
GO:0009116	32	0.058	1	0.0142	0.747	0.762	1	0.013	0.818	0.0472	1	0.0955	1	0.0414	1	0.00793	0.481	nucleoside metabolism	P
GO:0009117	205	0.00142	0.202	0.000206	0.028	0.0798	1	0.000362	0.042	0.0015	0.176	0.000869	0.0549	0.0272	1	0.0535	1	nucleotide metabolism	P
GO:0009119	13	0.08	1	0.0805	1	0.75	1	0.0459	1	0.115	1	0.162	1	0.0283	1	0.181	1	ribonucleoside metabolism	P
GO:0009123	24	0.0482	1	0.0155	1	0.541	1	0.0911	1	0.0571	1	0.0091	0.739	0.0222	1	0.478	1	nucleoside monophosphate metabolism	P
GO:0009124	24	0.0482	1	0.0155	1	0.541	1	0.0911	1	0.0571	1	0.0091	0.739	0.0222	1	0.478	1	nucleoside monophosphate biosynthesis	P
GO:0009126	18	0.116	1	0.06	1	0.472	1	0.0988	1	0.119	1	0.0347	1	0.114	1	0.927	1	purine nucleoside monophosphate metabolism	P
GO:0009127	18	0.116	1	0.06	1	0.472	1	0.0988	1	0.119	1	0.0347	1	0.114	1	0.927	1	purine nucleoside monophosphate biosynthesis	P
GO:0009132	12	0.374	1	0.396	1	0.43	1	0.537	1	0.458	1	0.466	1	0.229	1	0.153	1	nucleoside diphosphate metabolism	P
GO:0009141	63	0.0069	0.517	0.0461	1	0.0422	1	0.0484	1	0.00402	0.285	0.105	1	0.266	1	0.052	1	nucleoside triphosphate metabolism	P
GO:0009142	43	0.00106	0.096	0.162	1	0.00807	0.46	0.0719	1	0.00159	0.176	0.327	1	0.0637	1	0.154	1	nucleoside triphosphate biosynthesis	P
GO:0009143	10	0.636	1	0.144	1	0.315	1	0.0375	1	0.61	1	0.222	1	0.999	1	0.435	1	nucleoside triphosphate catabolism	P
GO:0009144	53	0.00213	0.202	0.0431	1	0.0204	1	0.151	1	0.00115	0.078	0.0624	1	0.25	1	0.0607	1	purine nucleoside triphosphate metabolism	P
GO:0009145	39	0.00084	0.083	0.238	1	0.00263	0.248	0.17	1	0.00169	0.176	0.377	1	0.0808	1	0.23	1	purine nucleoside triphosphate biosynthesis	P
GO:0009147	17	0.0687	1	0.138	1	0.163	1	0.0552	1	0.058	1	0.302	1	0.198	1	0.113	1	pyrimidine nucleoside triphosphate metabolism	P
GO:0009150	72	0.00195	0.202	0.025	1	0.0422	1	0.0649	1	0.00127	0.078	0.0276	1	0.153	1	0.235	1	purine ribonucleotide metabolism	P
GO:0009152	59	0.00132	0.202	0.11	1	0.0256	1	0.11	1	0.00208	0.285	0.152	1	0.0466	1	0.334	1	purine ribonucleotide biosynthesis	P
GO:0009156	23	0.0575	1	0.0169	1	0.474	1	0.0965	1	0.0791	1	0.0118	0.739	0.0272	1	0.42	1	ribonucleoside monophosphate biosynthesis	P
GO:0009161	23	0.0575	1	0.0169	1	0.474	1	0.0965	1	0.0791	1	0.0118	0.739	0.0272	1	0.42	1	ribonucleoside monophosphate metabolism	P
GO:0009165	133	0.00146	0.202	0.0105	0.518	0.152	1	0.0164	0.818	0.00118	0.078	0.01	0.739	0.0139	0.647	0.451	1	nucleotide biosynthesis	P
GO:0009166	24	0.616	1	0.0406	1	0.438	1	0.0593	1	0.622	1	0.0325	1	0.536	1	0.249	1	nucleotide catabolism	P
GO:0009167	18	0.116	1	0.06	1	0.472	1	0.0988	1	0.119	1	0.0347	1	0.114	1	0.927	1	purine ribonucleoside monophosphate metabolism	P
GO:0009168	18	0.116	1	0.06	1	0.472	1	0.0988	1	0.119	1	0.0347	1	0.114	1	0.927	1	purine ribonucleoside monophosphate biosynthesis	P
GO:0009187	45	0.943	1	0.421	1	0.882	1	0.199	1	0.85	1	0.457	1	0.966	1	0.746	1	cyclic nucleotide metabolism	P
GO:0009190	33	0.852	1	0.572	1	0.913	1	0.548	1	0.75	1	0.512	1	0.629	1	0.747	1	cyclic nucleotide biosynthesis	P
GO:0009199	52	0.00221	0.202	0.037	1	0.0261	1	0.0798	1	0.00113	0.078	0.0698	1	0.224	1	0.0595	1	ribonucleoside triphosphate metabolism	P
GO:0009201	40	0.000739	0.0671	0.187	1	0.00467	0.327	0.113	1	0.00122	0.078	0.342	1	0.0761	1	0.181	1	ribonucleoside triphosphate biosynthesis	P
GO:0009205	51	0.00247	0.202	0.0505	1	0.0186	1	0.12	1	0.00153	0.176	0.0803	1	0.233	1	0.0793	1	purine ribonucleoside triphosphate metabolism	P
GO:0009206	39	0.00084	0.083	0.238	1	0.00263	0.248	0.17	1	0.00169	0.176	0.377	1	0.0808	1	0.23	1	purine ribonucleoside triphosphate biosynthesis	P
GO:0009208	12	0.0215	1	0.103	1	0.0538	1	0.0883	1	0.0246	1	0.188	1	0.17	1	0.159	1	pyrimidine ribonucleoside triphosphate metabolism	P
GO:0009209	12	0.0215	1	0.103	1	0.0538	1	0.0883	1	0.0246	1	0.188	1	0.17	1	0.159	1	pyrimidine ribonucleoside triphosphate biosynthesis	P
GO:0009218	17	0.0185	1	0.0335	1	0.178	1	0.1	1	0.018	1	0.0712	1	0.098	1	0.0671	1	pyrimidine ribonucleotide metabolism	P
GO:0009220	16	0.0234	1	0.0437	1	0.151	1	0.0687	1	0.0216	1	0.1	1	0.156	1	0.0843	1	pyrimidine ribonucleotide biosynthesis	P
GO:0009225	15	0.109	1	0.0219	1	0.368	1	0.0874	1	0.0684	1	0.0478	1	0.331	1	0.0915	1	nucleotide-sugar metabolism	P
GO:0009237	42	0.707	1	0.444	1	0.54	1	0.162	1	0.744	1	0.619	1	0.527	1	0.277	1	siderophore metabolism	P
GO:0009238	42	0.707	1	0.444	1	0.54	1	0.162	1	0.744	1	0.619	1	0.527	1	0.277	1	enterobactin metabolism	P
GO:0009239	42	0.707	1	0.444	1	0.54	1	0.162	1	0.744	1	0.619	1	0.527	1	0.277	1	enterobactin biosynthesis	P
GO:0009247	14	0.336	1	0.12	1	0.761	1	0.128	1	0.294	1	0.194	1	0.101	1	0.309	1	glycolipid biosynthesis	P
GO:0009250	30	0.84	1	0.521	1	0.962	1	0.769	1	0.635	1	0.431	1	0.884	1	0.348	1	glucan biosynthesis	P
GO:0009259	81	0.000465	0.0337	0.00353	0.197	0.0525	1	0.0314	1	0.000325	0.0198	0.00493	0.27	0.0582	1	0.0841	1	ribonucleotide metabolism	P
GO:0009260	66	0.000421	0.0337	0.0265	1	0.0371	1	0.0411	1	0.00061	0.04	0.0518	1	0.0237	1	0.149	1	ribonucleotide biosynthesis	P
GO:0009261	10	0.282	1	0.102	1	0.205	1	0.208	1	0.287	1	0.0915	1	0.661	1	0.358	1	ribonucleotide catabolism	P
GO:0009262	15	0.412	1	0.0683	1	0.657	1	0.0642	1	0.328	1	0.0926	1	0.548	1	0.088	1	deoxyribonucleotide metabolism	P
GO:0009266	250	0.0187	1	0.18	1	0.00207	0.248	0.137	1	0.121	1	0.171	1	0.0604	1	0.756	1	response to temperature stimulus	P
GO:0009267	10	0.397	1	0.358	1	0.71	1	0.708	1	0.329	1	0.288	1	0.229	1	0.383	1	cellular response to starvation	P
GO:0009288	43	0.439	1	0.245	1	0.286	1	0.282	1	0.44	1	0.517	1	0.654	1	0.0324	1	flagellum (sensu Bacteria)	C
GO:0009296	14	0.083	1	0.0427	1	0.0954	1	0.176	1	0.149	1	0.024	1	0.157	1	0.0892	1	flagellum biogenesis	P
GO:0009303	14	0.00184	0.202	0.0169	1	0.0614	1	0.042	1	0.00325	0.285	0.0582	1	0.209	1	0.0792	1	rRNA transcription	P
GO:0009306	68	0.0274	1	0.053	1	0.0773	1	0.124	1	0.0243	1	0.0868	1	0.572	1	0.274	1	protein secretion	P
GO:0009308	556	0.00995	0.667	0.000552	0.069	0.00775	0.46	0.00132	0.115	0.0133	1	0.00193	0.161	0.494	1	0.148	1	amine metabolism	P
GO:0009309	122	0.451	1	0.0837	1	0.464	1	0.0294	1	0.475	1	0.14	1	0.408	1	0.197	1	amine biosynthesis	P
GO:0009310	70	0.0139	0.667	0.0101	0.518	0.0961	1	0.0533	1	0.0202	1	0.00524	0.27	0.0759	1	0.601	1	amine catabolism	P
GO:0009311	20	0.791	1	0.433	1	0.933	1	0.848	1	0.732	1	0.289	1	0.317	1	0.415	1	oligosaccharide metabolism	P
GO:0009314	137	0.00371	0.328	0.00619	0.36	0.00113	0.098	0.0791	1	0.00658	0.539	0.00182	0.161	0.497	1	0.247	1	response to radiation	P
GO:0009331	13	0.915	1	0.0719	1	0.759	1	0.069	1	0.964	1	0.402	1	0.65	1	0.0845	1	glycerol-3-phosphate dehydrogenase complex	C
GO:0009395	15	0.707	1	0.879	1	0.913	1	0.395	1	0.625	1	0.939	1	0.427	1	0.934	1	phospholipid catabolism	P
GO:0009396	12	0.154	1	0.0286	1	0.432	1	0.0491	1	0.0546	1	0.0394	1	0.992	1	0.539	1	folic acid and derivative biosynthesis	P
GO:0009405	35	0.0062	0.517	0.0828	1	0.0604	1	0.701	1	0.0119	0.539	0.132	1	0.233	1	0.0205	1	pathogenesis	P
GO:0009408	15	0.0169	0.667	0.596	1	0.015	0.693	0.327	1	0.0692	1	0.482	1	0.0292	1	0.998	1	response to heat	P
GO:0009409	227	0.0988	1	0.285	1	0.0107	0.532	0.175	1	0.304	1	0.308	1	0.2	1	0.746	1	response to cold	P
GO:0009410	34	0.983	1	0.952	1	0.885	1	0.957	1	0.977	1	0.92	1	0.912	1	0.972	1	response to xenobiotic stimulus	P
GO:0009411	48	0.00654	0.517	0.00493	0.36	0.0329	1	0.0213	1	0.00437	0.36	0.00394	0.27	0.211	1	0.137	1	response to UV	P
GO:0009416	108	0.00406	0.328	0.0152	1	0.00538	0.419	0.068	1	0.00346	0.285	0.00856	0.739	0.455	1	0.18	1	response to light stimulus	P
GO:0009434	17	0.663	1	0.328	1	0.337	1	0.264	1	0.661	1	0.345	1	0.866	1	0.49	1	flagellum (sensu Eukaryota)	C
GO:0009451	36	0.0116	0.667	0.174	1	0.111	1	0.928	1	0.00881	0.539	0.111	1	0.212	1	0.109	1	RNA modification	P
GO:0009566	78	0.367	1	0.819	1	0.47	1	0.679	1	0.408	1	0.882	1	0.461	1	0.432	1	fertilization	P
GO:0009581	63	0.346	1	0.427	1	0.211	1	0.411	1	0.262	1	0.28	1	0.984	1	0.87	1	detection of external stimulus	P
GO:0009582	56	0.424	1	0.253	1	0.146	1	0.247	1	0.353	1	0.197	1	0.999	1	0.792	1	detection of abiotic stimulus	P
GO:0009583	35	0.199	1	0.12	1	0.0692	1	0.249	1	0.19	1	0.0764	1	0.995	1	0.485	1	detection of light stimulus	P
GO:0009593	17	1	1	1	1	0.971	1	1	1	1	1	0.995	1	1	1	1	1	detection of chemical stimulus	P
GO:0009595	15	0.722	1	0.808	1	0.908	1	0.564	1	0.612	1	0.766	1	0.498	1	0.829	1	detection of biotic stimulus	P
GO:0009605	852	0.851	1	0.153	1	0.489	1	0.276	1	0.807	1	0.103	1	0.951	1	0.436	1	response to external stimulus	P
GO:0009607	333	0.133	1	0.216	1	0.455	1	0.757	1	0.072	1	0.0835	1	0.424	1	0.391	1	response to biotic stimulus	P
GO:0009611	567	0.985	1	0.532	1	0.714	1	0.362	1	0.989	1	0.523	1	0.937	1	0.654	1	response to wounding	P
GO:0009612	31	0.165	1	0.14	1	0.177	1	0.274	1	0.164	1	0.131	1	0.79	1	0.444	1	response to mechanical stimulus	P
GO:0009615	117	0.0517	1	0.431	1	0.0765	1	0.762	1	0.0847	1	0.446	1	0.132	1	0.179	1	response to virus	P
GO:0009617	126	1	1	0.999	1	1	1	0.988	1	0.985	1	0.996	1	1	1	0.983	1	response to bacterium	P
GO:0009620	24	1	1	0.974	1	0.948	1	0.878	1	0.998	1	0.985	1	1	1	0.916	1	response to fungus	P
GO:0009628	445	0.000115	0.025	0.00225	0.177	7.22e-06	0.00266	0.018	1	0.00177	0.176	0.00119	0.064	0.11	1	0.336	1	response to abiotic stimulus	P
GO:0009636	27	0.192	1	0.0928	1	0.239	1	0.0785	1	0.158	1	0.0734	1	0.687	1	0.513	1	response to toxin	P
GO:0009650	10	0.182	1	0.0687	1	0.165	1	0.285	1	0.246	1	0.0369	1	0.168	1	0.275	1	UV protection	P
GO:0009653	1381	0.925	1	0.464	1	0.579	1	0.238	1	0.941	1	0.559	1	0.695	1	0.3	1	morphogenesis	P
GO:0009698	43	0.762	1	0.514	1	0.596	1	0.198	1	0.781	1	0.675	1	0.57	1	0.315	1	phenylpropanoid metabolism	P
GO:0009712	42	0.707	1	0.444	1	0.54	1	0.162	1	0.744	1	0.619	1	0.527	1	0.277	1	catechol metabolism	P
GO:0009719	499	5.28e-09	0.000806	2.69e-07	0.00839	8.36e-05	0.012	4.67e-06	0.008	4.06e-08	0.000964	1.15e-06	0.00297	0.00286	0.195	0.0989	1	response to endogenous stimulus	P
GO:0009725	124	0.365	1	0.451	1	0.761	1	0.263	1	0.425	1	0.608	1	0.0779	1	0.308	1	response to hormone stimulus	P
GO:0009743	27	0.0796	1	0.246	1	0.127	1	0.392	1	0.0536	1	0.19	1	0.434	1	0.736	1	response to carbohydrate stimulus	P
GO:0009746	20	0.0322	1	0.168	1	0.0721	1	0.377	1	0.0218	1	0.128	1	0.2	1	0.694	1	response to hexose stimulus	P
GO:0009749	20	0.0322	1	0.168	1	0.0721	1	0.377	1	0.0218	1	0.128	1	0.2	1	0.694	1	response to glucose stimulus	P
GO:0009755	37	0.0146	0.667	0.016	1	0.0601	1	0.00468	0.346	0.0345	1	0.0436	1	0.0445	1	0.202	1	hormone-mediated signaling	P
GO:0009790	454	0.656	1	0.988	1	0.711	1	0.994	1	0.543	1	0.963	1	0.72	1	0.853	1	embryonic development	P
GO:0009791	74	0.388	1	0.569	1	0.156	1	0.421	1	0.401	1	0.538	1	0.82	1	0.653	1	post-embryonic development	P
GO:0009792	247	0.102	1	0.655	1	0.368	1	0.798	1	0.0968	1	0.61	1	0.103	1	0.397	1	embryonic development (sensu Metazoa)	P
GO:0009798	21	0.786	1	0.838	1	0.701	1	0.956	1	0.692	1	0.677	1	0.888	1	0.728	1	axis specification	P
GO:0009799	34	0.825	1	0.233	1	0.992	1	0.406	1	0.726	1	0.234	1	0.485	1	0.195	1	determination of symmetry	P
GO:0009855	34	0.825	1	0.233	1	0.992	1	0.406	1	0.726	1	0.234	1	0.485	1	0.195	1	determination of bilateral symmetry	P
GO:0009880	46	0.986	1	1	1	0.877	1	1	1	0.94	1	0.992	1	1	1	0.999	1	embryonic pattern specification	P
GO:0009881	15	0.509	1	0.469	1	0.0336	1	0.353	1	0.567	1	0.288	1	1	1	0.982	1	photoreceptor activity	F
GO:0009887	715	1	1	0.994	1	0.998	1	0.994	1	0.999	1	0.993	1	0.826	1	0.511	1	organ morphogenesis	P
GO:0009888	450	0.998	1	1	1	0.982	1	1	1	0.987	1	0.999	1	1	1	0.936	1	tissue development	P
GO:0009889	237	5.53e-05	0.011	4.86e-06	0.00839	1.28e-06	0.00242	4.95e-05	0.008	0.00379	0.285	3.47e-05	0.012	0.00903	0.63	0.0123	0.647	regulation of biosynthesis	P
GO:0009890	54	0.0726	1	0.0996	1	0.0117	0.532	0.366	1	0.29	1	0.106	1	0.0834	1	0.0704	1	negative regulation of biosynthesis	P
GO:0009891	93	0.0783	1	0.0374	1	0.00901	0.46	0.0121	0.818	0.325	1	0.0907	1	0.0606	1	0.115	1	positive regulation of biosynthesis	P
GO:0009892	513	4.2e-09	0.000806	2.35e-07	0.00839	1.91e-06	0.00242	0.000338	0.042	3.73e-08	0.000964	1.19e-06	0.00297	0.0345	1	0.00214	0.14	negative regulation of metabolism	P
GO:0009893	567	0.0208	1	0.00126	0.091	0.00679	0.46	0.00596	0.346	0.0684	1	0.00211	0.161	0.133	1	0.132	1	positive regulation of metabolism	P
GO:0009894	40	0.0795	1	0.286	1	0.0624	1	0.488	1	0.198	1	0.165	1	0.139	1	0.713	1	regulation of catabolism	P
GO:0009895	12	0.888	1	0.997	1	0.557	1	0.817	1	0.969	1	0.986	1	0.833	1	1	1	negative regulation of catabolism	P
GO:0009896	10	0.624	1	0.532	1	0.324	1	0.748	1	0.956	1	0.389	1	0.163	1	0.807	1	positive regulation of catabolism	P
GO:0009897	97	0.695	1	0.641	1	0.841	1	0.892	1	0.49	1	0.459	1	0.774	1	0.786	1	external side of plasma membrane	C
GO:0009898	11	0.797	1	0.515	1	0.758	1	0.688	1	0.97	1	0.574	1	0.103	1	0.264	1	internal side of plasma membrane	C
GO:0009913	73	1	1	1	1	0.983	1	1	1	1	1	1	1	0.999	1	0.989	1	epidermal cell differentiation	P
GO:0009925	25	0.508	1	0.508	1	0.651	1	0.979	1	0.68	1	0.46	1	0.0453	1	0.133	1	basal plasma membrane	C
GO:0009948	12	0.984	1	0.903	1	0.999	1	0.999	1	0.811	1	0.825	1	1	1	0.64	1	anterior/posterior axis specification	P
GO:0009952	116	1	1	1	1	0.999	1	1	1	0.999	1	1	1	1	1	0.954	1	anterior/posterior pattern formation	P
GO:0009953	45	0.734	1	0.988	1	0.909	1	1	1	0.669	1	0.863	1	0.743	1	0.997	1	dorsal/ventral pattern formation	P
GO:0009954	21	1	1	1	1	0.999	1	0.996	1	1	1	1	1	0.998	1	1	1	proximal/distal pattern formation	P
GO:0009966	543	0.00629	0.517	0.000454	0.069	0.000323	0.036	0.00266	0.147	0.018	1	0.000601	0.0549	0.673	1	0.468	1	regulation of signal transduction	P
GO:0009967	190	0.0447	1	0.0185	1	0.0498	1	0.0721	1	0.0851	1	0.0427	1	0.0972	1	0.0608	1	positive regulation of signal transduction	P
GO:0009968	132	0.0868	1	0.155	1	0.0742	1	0.0845	1	0.109	1	0.223	1	0.551	1	0.617	1	negative regulation of signal transduction	P
GO:0009975	23	0.935	1	0.235	1	0.608	1	0.175	1	0.925	1	0.212	1	0.905	1	0.773	1	cyclase activity	F
GO:0009982	37	0.643	1	0.461	1	0.78	1	0.264	1	0.527	1	0.567	1	0.668	1	0.35	1	pseudouridine synthase activity	F
GO:0009986	233	0.617	1	0.384	1	0.614	1	0.104	1	0.471	1	0.493	1	0.798	1	0.744	1	cell surface	C
GO:0009987	13550	0	0	0	0	5.41e-34	0	5.76e-42	0	0	0	0	0	1.05e-19	0	1.16e-26	0	cellular process	P
GO:0009991	87	0.0682	1	0.0185	1	0.255	1	0.474	1	0.0616	1	0.00991	0.739	0.181	1	0.0504	1	response to extracellular stimulus	P
GO:0009994	14	0.2	1	0.862	1	0.393	1	0.296	1	0.16	1	0.816	1	0.095	1	0.87	1	oocyte differentiation	P
GO:0010001	41	0.271	1	0.944	1	0.085	1	0.835	1	0.411	1	0.922	1	0.264	1	0.953	1	glial cell differentiation	P
GO:0010008	110	8.4e-05	0.0124	0.00016	0.015	0.0782	1	0.00661	0.453	0.000127	0.017	0.00114	0.0549	0.00242	0.195	0.0099	0.481	endosome membrane	C
GO:0010033	83	0.0979	1	0.157	1	0.107	1	0.254	1	0.0959	1	0.111	1	0.414	1	0.693	1	response to organic substance	P
GO:0010035	57	0.81	1	0.286	1	0.551	1	0.64	1	0.758	1	0.134	1	0.987	1	0.645	1	response to inorganic substance	P
GO:0010038	50	0.846	1	0.372	1	0.581	1	0.615	1	0.788	1	0.254	1	0.989	1	0.52	1	response to metal ion	P
GO:0010092	13	0.762	1	0.991	1	0.975	1	0.998	1	0.549	1	0.95	1	0.916	1	0.967	1	specification of organ identity	P
GO:0010165	12	0.189	1	0.202	1	0.374	1	0.676	1	0.122	1	0.0719	1	0.691	1	0.869	1	response to X-ray	P
GO:0010181	12	0.264	1	0.206	1	0.343	1	0.13	1	0.185	1	0.222	1	0.448	1	0.793	1	FMN binding	F
GO:0010212	12	0.397	1	0.109	1	0.237	1	0.253	1	0.427	1	0.051	1	0.49	1	0.547	1	response to ionizing radiation	P
GO:0012501	882	6.3e-10	0.000806	6.48e-14	0	5.23e-08	0.001	3.11e-08	0.000971	7.09e-08	0.00169	4.74e-11	0	0.000113	0.025	3.92e-07	0.00188	programmed cell death	P
GO:0012502	245	3.97e-05	0.01	3.37e-06	0.00839	0.000168	0.015	2.72e-05	0.008	0.000221	0.017	0.000102	0.017	0.0409	1	0.00624	0.36	induction of programmed cell death	P
GO:0012505	1112	4.55e-10	0.000806	1.08e-13	0	7.03e-05	0.012	2.44e-05	0.008	3.44e-09	0.000964	2.31e-13	0	3.3e-05	0.00544	6.65e-05	0.009	endomembrane system	C
GO:0012506	127	3.48e-05	0.01	7.58e-05	0.01	0.000792	0.045	0.00558	0.346	3.87e-05	0.005	0.000111	0.017	0.0317	1	0.15	1	vesicle membrane	C
GO:0012510	14	0.097	1	0.0615	1	0.266	1	0.384	1	0.107	1	0.0447	1	0.0726	1	0.684	1	trans-Golgi network transport vesicle membrane	C
GO:0014003	10	0.219	1	0.825	1	0.204	1	0.475	1	0.222	1	0.837	1	0.38	1	1	1	oligodendrocyte development	P
GO:0014013	11	0.951	1	0.999	1	0.996	1	0.849	1	0.892	1	1	1	0.981	1	0.717	1	regulation of gliogenesis	P
GO:0014020	29	0.377	1	0.254	1	0.08	1	0.482	1	0.565	1	0.192	1	0.677	1	0.285	1	primary neural tube formation	P
GO:0014031	40	0.997	1	0.984	1	0.97	1	0.997	1	0.999	1	0.957	1	0.888	1	0.884	1	mesenchymal cell development	P
GO:0014032	27	0.998	1	0.998	1	0.961	1	0.999	1	1	1	0.988	1	0.856	1	0.996	1	neural crest cell development	P
GO:0014033	27	0.998	1	0.998	1	0.961	1	0.999	1	1	1	0.988	1	0.856	1	0.996	1	neural crest cell differentiation	P
GO:0014065	10	0.192	1	0.326	1	0.371	1	0.571	1	0.224	1	0.305	1	0.0124	0.63	0.243	1	phosphoinositide 3-kinase cascade	P
GO:0014069	22	0.954	1	0.971	1	0.601	1	0.993	1	0.983	1	0.865	1	0.65	1	0.858	1	postsynaptic density	C
GO:0015002	28	0.216	1	0.0664	1	0.117	1	0.183	1	0.284	1	0.073	1	0.897	1	0.147	1	heme-copper terminal oxidase activity	F
GO:0015012	10	0.956	1	0.963	1	0.888	1	0.82	1	0.699	1	0.889	1	0.985	1	1	1	heparan sulfate proteoglycan biosynthesis	P
GO:0015020	22	1	1	1	1	1	1	1	1	0.999	1	1	1	1	1	1	1	glucuronosyltransferase activity	F
GO:0015026	16	0.304	1	0.64	1	0.33	1	0.627	1	0.253	1	0.67	1	0.468	1	0.634	1	coreceptor activity	F
GO:0015031	827	1.98e-24	0	1.45e-25	0	2.93e-13	0	3.9e-11	0	1.25e-21	0	2.89e-24	0	1.25e-06	0.00195	5.09e-07	0.00188	protein transport	P
GO:0015035	14	0.879	1	0.965	1	0.905	1	0.996	1	0.808	1	0.874	1	0.585	1	0.716	1	protein disulfide oxidoreductase activity	F
GO:0015036	18	0.673	1	0.92	1	0.785	1	0.874	1	0.612	1	0.932	1	0.66	1	0.674	1	disulfide oxidoreductase activity	F
GO:0015057	40	0.684	1	0.489	1	0.459	1	0.732	1	0.576	1	0.444	1	0.972	1	0.447	1	thrombin receptor activity	F
GO:0015074	16	0.123	1	0.696	1	0.47	1	0.862	1	0.155	1	0.474	1	0.0632	1	0.826	1	DNA integration	P
GO:0015075	931	0.0786	1	0.133	1	0.179	1	0.233	1	0.0453	1	0.0957	1	0.84	1	0.416	1	ion transporter activity	F
GO:0015077	131	0.00373	0.328	0.195	1	0.04	1	0.0632	1	0.00268	0.285	0.248	1	0.254	1	0.665	1	monovalent inorganic cation transporter activity	F
GO:0015078	120	0.00234	0.202	0.093	1	0.0429	1	0.0345	1	0.00153	0.176	0.123	1	0.185	1	0.57	1	hydrogen ion transporter activity	F
GO:0015082	48	0.157	1	0.00607	0.36	0.967	1	0.152	1	0.0677	1	0.000785	0.0549	0.488	1	0.591	1	di-, tri-valent inorganic cation transporter activity	F
GO:0015085	13	0.958	1	0.15	1	0.961	1	0.329	1	0.921	1	0.0731	1	0.966	1	0.829	1	calcium ion transporter activity	F
GO:0015103	48	0.356	1	0.399	1	0.466	1	0.301	1	0.198	1	0.525	1	0.833	1	0.347	1	inorganic anion transporter activity	F
GO:0015106	24	0.521	1	0.499	1	0.334	1	0.496	1	0.522	1	0.515	1	0.632	1	0.69	1	bicarbonate transporter activity	F
GO:0015108	25	0.35	1	0.503	1	0.18	1	0.411	1	0.476	1	0.569	1	0.388	1	0.663	1	chloride transporter activity	F
GO:0015114	13	0.397	1	0.319	1	0.886	1	0.356	1	0.124	1	0.448	1	0.973	1	0.0915	1	phosphate transporter activity	F
GO:0015116	12	0.39	1	0.988	1	0.49	1	0.648	1	0.406	1	0.998	1	0.48	1	0.801	1	sulfate transporter activity	F
GO:0015125	11	0.823	1	0.865	1	0.776	1	0.454	1	0.926	1	0.975	1	0.426	1	0.7	1	bile acid transporter activity	F
GO:0015144	46	0.0851	1	0.0233	1	0.2	1	0.0238	1	0.106	1	0.07	1	0.169	1	0.292	1	carbohydrate transporter activity	F
GO:0015145	17	0.0395	1	0.0189	1	0.0437	1	0.0423	1	0.0706	1	0.05	1	0.0706	1	0.3	1	monosaccharide transporter activity	F
GO:0015149	16	0.0821	1	0.0429	1	0.0712	1	0.0965	1	0.129	1	0.0884	1	0.144	1	0.336	1	hexose transporter activity	F
GO:0015171	55	0.865	1	0.106	1	0.655	1	0.293	1	0.861	1	0.0695	1	0.862	1	0.476	1	amino acid transporter activity	F
GO:0015172	11	0.958	1	0.217	1	0.798	1	0.202	1	0.942	1	0.207	1	0.871	1	0.738	1	acidic amino acid transporter activity	F
GO:0015175	18	0.627	1	0.295	1	0.776	1	0.372	1	0.77	1	0.166	1	0.301	1	0.842	1	neutral amino acid transporter activity	F
GO:0015179	36	0.953	1	0.218	1	0.74	1	0.256	1	0.948	1	0.153	1	0.801	1	0.921	1	L-amino acid transporter activity	F
GO:0015197	20	0.945	1	0.0876	1	0.73	1	0.114	1	0.962	1	0.0958	1	0.905	1	0.419	1	peptide transporter activity	F
GO:0015203	21	1	1	0.823	1	0.958	1	0.765	1	1	1	0.894	1	0.972	1	0.407	1	polyamine transporter activity	F
GO:0015232	12	0.599	1	0.656	1	0.686	1	0.27	1	0.558	1	0.971	1	0.591	1	0.577	1	heme transporter activity	F
GO:0015238	35	0.62	1	0.281	1	0.167	1	0.772	1	0.672	1	0.2	1	0.993	1	0.364	1	drug transporter activity	F
GO:0015247	15	0.7	1	0.471	1	0.516	1	0.416	1	0.438	1	0.616	1	1	1	0.146	1	aminophospholipid transporter activity	F
GO:0015248	13	0.295	1	0.835	1	0.199	1	0.601	1	0.24	1	0.742	1	0.898	1	0.986	1	sterol transporter activity	F
GO:0015267	520	0.315	1	0.414	1	0.278	1	0.523	1	0.319	1	0.314	1	0.519	1	0.49	1	channel or pore class transporter activity	F
GO:0015268	517	0.304	1	0.377	1	0.288	1	0.494	1	0.304	1	0.28	1	0.506	1	0.475	1	alpha-type channel activity	F
GO:0015269	15	0.613	1	0.816	1	0.71	1	0.99	1	0.485	1	0.525	1	0.857	1	0.897	1	calcium-activated potassium channel activity	F
GO:0015276	106	0.856	1	0.933	1	0.514	1	0.724	1	0.824	1	0.884	1	0.989	1	0.936	1	ligand-gated ion channel activity	F
GO:0015290	297	0.869	1	0.341	1	0.95	1	0.71	1	0.709	1	0.165	1	0.932	1	0.788	1	electrochemical potential-driven transporter activity	F
GO:0015291	297	0.869	1	0.341	1	0.95	1	0.71	1	0.709	1	0.165	1	0.932	1	0.788	1	porter activity	F
GO:0015293	173	0.973	1	0.782	1	0.989	1	0.859	1	0.915	1	0.644	1	0.943	1	0.828	1	symporter activity	F
GO:0015294	110	0.982	1	0.915	1	0.977	1	0.83	1	0.982	1	0.87	1	0.881	1	0.947	1	solute:cation symporter activity	F
GO:0015296	75	0.807	1	0.556	1	0.904	1	0.633	1	0.792	1	0.471	1	0.378	1	0.689	1	anion:cation symporter activity	F
GO:0015297	90	0.706	1	0.365	1	0.482	1	0.879	1	0.557	1	0.197	1	0.993	1	0.777	1	antiporter activity	F
GO:0015298	42	0.81	1	0.478	1	0.387	1	0.739	1	0.753	1	0.39	1	0.999	1	0.559	1	solute:cation antiporter activity	F
GO:0015299	42	0.81	1	0.478	1	0.387	1	0.739	1	0.753	1	0.39	1	0.999	1	0.559	1	solute:hydrogen antiporter activity	F
GO:0015300	47	0.639	1	0.38	1	0.403	1	0.825	1	0.535	1	0.23	1	0.996	1	0.611	1	solute:solute antiporter activity	F
GO:0015301	25	0.581	1	0.526	1	0.395	1	0.472	1	0.59	1	0.543	1	0.581	1	0.731	1	anion:anion antiporter activity	F
GO:0015307	26	0.423	1	0.164	1	0.0587	1	0.633	1	0.615	1	0.126	1	0.898	1	0.167	1	drug:hydrogen antiporter activity	F
GO:0015370	106	0.972	1	0.901	1	0.964	1	0.776	1	0.975	1	0.873	1	0.85	1	0.941	1	solute:sodium symporter activity	F
GO:0015380	23	0.427	1	0.404	1	0.276	1	0.42	1	0.437	1	0.433	1	0.556	1	0.646	1	anion exchanger activity	F
GO:0015385	14	0.96	1	0.871	1	0.999	1	0.467	1	0.701	1	0.865	1	1	1	0.999	1	sodium:hydrogen antiporter activity	F
GO:0015399	110	0.0586	1	0.0934	1	0.527	1	0.238	1	0.0213	1	0.116	1	0.399	1	0.147	1	primary active transporter activity	F
GO:0015405	110	0.0586	1	0.0934	1	0.527	1	0.238	1	0.0213	1	0.116	1	0.399	1	0.147	1	P-P-bond-hydrolysis-driven transporter activity	F
GO:0015450	21	0.13	1	0.142	1	0.656	1	0.309	1	0.124	1	0.105	1	0.171	1	0.361	1	protein translocase activity	F
GO:0015457	46	0.72	1	0.941	1	0.996	1	0.857	1	0.46	1	0.912	1	0.542	1	0.933	1	auxiliary transport protein activity	F
GO:0015459	20	0.809	1	0.997	1	0.996	1	0.927	1	0.558	1	0.994	1	0.817	1	0.937	1	potassium channel regulator activity	F
GO:0015464	34	0.714	1	0.957	1	0.814	1	0.714	1	0.568	1	0.992	1	0.593	1	0.579	1	acetylcholine receptor activity	F
GO:0015485	17	0.25	1	0.484	1	0.0857	1	0.74	1	0.222	1	0.324	1	0.995	1	0.564	1	cholesterol binding	F
GO:0015491	21	0.972	1	0.735	1	1	1	0.802	1	0.769	1	0.601	1	0.997	1	0.973	1	cation:cation antiporter activity	F
GO:0015520	26	0.423	1	0.164	1	0.0587	1	0.633	1	0.615	1	0.126	1	0.898	1	0.167	1	tetracycline:hydrogen antiporter activity	F
GO:0015629	320	0.00589	0.35	1.98e-05	0.00958	0.000972	0.098	0.000386	0.042	0.0117	0.539	6.66e-05	0.017	0.545	1	0.0378	1	actin cytoskeleton	C
GO:0015630	425	1.96e-10	0	7.34e-08	0.00497	3.03e-07	0.00242	0.000257	0.027	4.53e-09	0.000964	1.54e-07	0.00092	0.0053	0.357	0.0159	0.849	microtubule cytoskeleton	C
GO:0015631	74	0.000166	0.025	0.000112	0.015	0.00303	0.248	0.00262	0.147	0.000507	0.022	0.000921	0.0549	0.0518	1	0.0216	1	tubulin binding	F
GO:0015645	11	0.617	1	0.676	1	0.885	1	0.794	1	0.602	1	0.521	1	0.189	1	0.674	1	fatty-acid ligase activity	F
GO:0015662	58	0.29	1	0.0831	1	0.692	1	0.408	1	0.103	1	0.104	1	0.885	1	0.0401	1	ATPase activity, coupled to transmembrane movement of ions, phosphorylative mechanism	F
GO:0015669	18	0.265	1	1	1	0.921	1	1	1	0.184	1	0.999	1	0.105	1	0.137	1	gas transport	P
GO:0015671	16	0.249	1	1	1	0.955	1	1	1	0.146	1	0.997	1	0.0995	1	0.18	1	oxygen transport	P
GO:0015672	463	0.321	1	0.553	1	0.386	1	0.33	1	0.237	1	0.605	1	0.864	1	0.628	1	monovalent inorganic cation transport	P
GO:0015674	240	0.268	1	0.0241	1	0.621	1	0.181	1	0.274	1	0.00344	0.27	0.244	1	0.888	1	di-, tri-valent inorganic cation transport	P
GO:0015695	10	1	1	0.861	1	0.618	1	0.634	1	1	1	0.966	1	0.956	1	0.71	1	organic cation transport	P
GO:0015698	192	1	1	1	1	0.952	1	0.991	1	1	1	0.999	1	0.996	1	1	1	inorganic anion transport	P
GO:0015711	14	0.592	1	0.783	1	0.932	1	0.897	1	0.428	1	0.529	1	0.646	1	0.781	1	organic anion transport	P
GO:0015718	16	0.316	1	0.287	1	0.456	1	0.844	1	0.157	1	0.0959	1	1	1	0.833	1	monocarboxylic acid transport	P
GO:0015749	43	0.0131	0.667	0.0239	1	0.0337	1	0.0637	1	0.019	1	0.0536	1	0.0756	1	0.125	1	monosaccharide transport	P
GO:0015758	42	0.0136	0.667	0.0226	1	0.0431	1	0.103	1	0.0193	1	0.0372	1	0.066	1	0.108	1	glucose transport	P
GO:0015800	18	0.0258	1	0.00317	0.197	0.113	1	0.0572	1	0.00966	0.539	0.00494	0.27	0.734	1	0.0766	1	acidic amino acid transport	P
GO:0015804	16	0.586	1	0.297	1	0.803	1	0.342	1	0.68	1	0.155	1	0.376	1	0.924	1	neutral amino acid transport	P
GO:0015807	14	0.196	1	0.0488	1	0.83	1	0.66	1	0.114	1	0.00605	0.351	0.412	1	0.93	1	L-amino acid transport	P
GO:0015813	18	0.0258	1	0.00317	0.197	0.113	1	0.0572	1	0.00966	0.539	0.00494	0.27	0.734	1	0.0766	1	glutamate transport	P
GO:0015833	64	0.911	1	0.298	1	0.626	1	0.481	1	0.875	1	0.215	1	0.99	1	0.543	1	peptide transport	P
GO:0015837	93	0.498	1	0.0653	1	0.412	1	0.373	1	0.352	1	0.0177	0.881	0.983	1	0.657	1	amine transport	P
GO:0015849	149	0.303	1	0.31	1	0.743	1	0.861	1	0.157	1	0.0901	1	0.65	1	0.861	1	organic acid transport	P
GO:0015886	11	0.614	1	0.567	1	0.687	1	0.21	1	0.544	1	0.948	1	0.646	1	0.503	1	heme transport	P
GO:0015893	31	0.402	1	0.114	1	0.0761	1	0.76	1	0.583	1	0.0666	1	0.923	1	0.126	1	drug transport	P
GO:0015904	26	0.423	1	0.164	1	0.0587	1	0.633	1	0.615	1	0.126	1	0.898	1	0.167	1	tetracycline transport	P
GO:0015908	12	0.0308	1	0.0278	1	0.0534	1	0.0318	1	0.0839	1	0.0365	1	0.133	1	0.124	1	fatty acid transport	P
GO:0015914	18	0.414	1	0.33	1	0.252	1	0.24	1	0.222	1	0.415	1	1	1	0.327	1	phospholipid transport	P
GO:0015918	16	0.0834	1	0.249	1	0.0376	1	0.13	1	0.0921	1	0.357	1	0.55	1	0.469	1	sterol transport	P
GO:0015923	16	0.545	1	0.142	1	0.353	1	0.294	1	0.597	1	0.0969	1	0.737	1	0.439	1	mannosidase activity	F
GO:0015924	10	0.603	1	0.165	1	0.361	1	0.393	1	0.72	1	0.113	1	0.849	1	0.411	1	mannosyl-oligosaccharide mannosidase activity	F
GO:0015926	11	0.446	1	0.247	1	0.553	1	0.366	1	0.461	1	0.0604	1	0.173	1	0.997	1	glucosidase activity	F
GO:0015929	12	0.0237	1	0.247	1	0.605	1	0.417	1	0.00972	0.539	0.793	1	0.101	1	0.0152	0.849	hexosaminidase activity	F
GO:0015931	103	2.35e-07	0.00195	3.22e-11	0	4.68e-05	0.012	4.32e-06	0.008	9.38e-07	0.00245	1.18e-10	0	0.0259	1	0.000565	0.0916	nucleobase, nucleoside, nucleotide and nucleic acid transport	P
GO:0015932	24	0.00799	0.634	0.00109	0.091	0.00441	0.327	0.211	1	0.0141	1	0.000179	0.026	0.188	1	0.363	1	nucleobase, nucleoside, nucleotide and nucleic acid transporter activity	F
GO:0015934	32	0.0396	1	0.19	1	0.228	1	0.602	1	0.095	1	0.119	1	0.007	0.544	0.469	1	large ribosomal subunit	C
GO:0015935	40	0.03	1	0.0212	1	0.127	1	0.145	1	0.0423	1	0.0475	1	0.124	1	0.116	1	small ribosomal subunit	C
GO:0015936	13	0.199	1	0.646	1	0.0817	1	0.847	1	0.415	1	0.56	1	0.18	1	0.71	1	coenzyme A metabolism	P
GO:0015980	211	0.00025	0.0337	0.0004	0.069	0.000233	0.024	0.0103	0.713	0.000697	0.04	0.000669	0.0549	0.205	1	0.0992	1	energy derivation by oxidation of organic compounds	P
GO:0015985	20	0.00295	0.239	0.446	1	0.0327	1	0.156	1	0.00287	0.285	0.601	1	0.0696	1	0.472	1	energy coupled proton transport, down electrochemical gradient	P
GO:0015986	20	0.00295	0.239	0.446	1	0.0327	1	0.156	1	0.00287	0.285	0.601	1	0.0696	1	0.472	1	ATP synthesis coupled proton transport	P
GO:0015992	71	0.00397	0.328	0.0749	1	0.171	1	0.0665	1	0.00273	0.285	0.0759	1	0.123	1	0.711	1	proton transport	P
GO:0016010	18	1	1	0.88	1	1	1	0.995	1	0.999	1	0.658	1	0.867	1	0.952	1	dystrophin-associated glycoprotein complex	C
GO:0016020	7368	0.00399	0.328	1.68e-06	0.00839	0.0388	1	0.0718	1	0.00113	0.078	1.93e-08	0.000837	0.421	1	0.0397	1	membrane	C
GO:0016021	5470	0.981	1	0.584	1	0.972	1	0.954	1	0.907	1	0.247	1	0.982	1	0.742	1	integral to membrane	C
GO:0016023	411	1.03e-06	0.00195	2.73e-06	0.00839	0.00133	0.098	0.000427	0.042	1.05e-06	0.0026	2.59e-06	0.00297	0.00475	0.357	0.108	1	cytoplasmic membrane-bound vesicle	C
GO:0016032	73	0.0127	0.667	0.155	1	0.234	1	0.396	1	0.00786	0.539	0.103	1	0.086	1	0.376	1	viral life cycle	P
GO:0016042	145	0.0564	1	0.139	1	0.135	1	0.326	1	0.0934	1	0.26	1	0.137	1	0.0349	1	lipid catabolism	P
GO:0016043	2348	2.41e-29	0	4.41e-31	0	3.38e-17	0	2.49e-11	0	5.11e-27	0	6.72e-29	0	5.88e-06	0.002	5.43e-13	0	cell organization and biogenesis	P
GO:0016044	123	0.00217	0.202	0.00462	0.36	0.0293	1	0.123	1	0.0065	0.539	0.00297	0.239	0.0378	1	0.0835	1	membrane organization and biogenesis	P
GO:0016049	208	0.108	1	0.0241	1	0.0274	1	0.00139	0.115	0.123	1	0.127	1	0.684	1	0.132	1	cell growth	P
GO:0016051	138	0.272	1	0.165	1	0.428	1	0.131	1	0.225	1	0.322	1	0.6	1	0.184	1	carbohydrate biosynthesis	P
GO:0016052	120	0.000608	0.0337	0.00363	0.197	0.00062	0.036	0.0353	1	0.00317	0.285	0.00591	0.351	0.124	1	0.0529	1	carbohydrate catabolism	P
GO:0016053	90	0.183	1	0.0123	0.677	0.22	1	0.0963	1	0.364	1	0.0145	0.739	0.128	1	0.291	1	organic acid biosynthesis	P
GO:0016054	10	0.141	1	0.109	1	0.212	1	0.292	1	0.186	1	0.164	1	0.301	1	0.084	1	organic acid catabolism	P
GO:0016055	130	0.0142	0.667	0.0135	0.747	0.219	1	0.0454	1	0.0069	0.539	0.00884	0.739	0.137	1	0.35	1	Wnt receptor signaling pathway	P
GO:0016064	118	0.791	1	0.528	1	0.731	1	0.496	1	0.705	1	0.425	1	0.851	1	0.909	1	immunoglobulin mediated immune response	P
GO:0016068	52	0.72	1	0.514	1	0.379	1	0.643	1	0.817	1	0.367	1	0.6	1	0.804	1	type I hypersensitivity	P
GO:0016070	642	9.72e-32	0	1.25e-29	0	1.1e-13	0	5.07e-12	0	9.27e-28	0	2.37e-25	0	1.59e-10	0	1.25e-11	0	RNA metabolism	P
GO:0016071	343	6.5e-22	0	2.24e-23	0	6.17e-11	0.000934	1.85e-09	0	1.79e-18	0	4.33e-21	0	3.69e-08	0.000855	8.18e-10	0.000771	mRNA metabolism	P
GO:0016072	77	0.00511	0.328	0.0329	1	0.151	1	0.167	1	0.00327	0.285	0.101	1	0.124	1	0.0588	1	rRNA metabolism	P
GO:0016073	12	0.00931	0.667	0.0661	1	0.174	1	0.1	1	0.0037	0.285	0.0617	1	0.0555	1	0.544	1	snRNA metabolism	P
GO:0016079	13	0.357	1	0.179	1	0.582	1	0.402	1	0.356	1	0.154	1	0.318	1	0.207	1	synaptic vesicle exocytosis	P
GO:0016089	43	0.762	1	0.514	1	0.596	1	0.198	1	0.781	1	0.675	1	0.57	1	0.315	1	aromatic amino acid family biosynthesis, shikimate pathway	P
GO:0016125	94	0.054	1	0.205	1	0.0632	1	0.209	1	0.065	1	0.27	1	0.352	1	0.167	1	sterol metabolism	P
GO:0016126	35	0.318	1	0.42	1	0.345	1	0.234	1	0.299	1	0.5	1	0.468	1	0.53	1	sterol biosynthesis	P
GO:0016127	10	0.189	1	0.522	1	0.0196	1	0.109	1	0.567	1	0.944	1	0.447	1	0.21	1	sterol catabolism	P
GO:0016180	12	0.00931	0.667	0.0661	1	0.174	1	0.1	1	0.0037	0.285	0.0617	1	0.0555	1	0.544	1	snRNA processing	P
GO:0016192	550	8.8e-14	0	3.95e-15	0	1.65e-09	0.000934	4.25e-08	0.000971	3.16e-12	0	1.27e-13	0	0.00519	0.357	0.000441	0.027	vesicle-mediated transport	P
GO:0016197	47	0.0485	1	0.0489	1	0.0461	1	0.276	1	0.0316	1	0.0586	1	0.894	1	0.167	1	endosome transport	P
GO:0016202	16	0.188	1	0.174	1	0.443	1	0.49	1	0.203	1	0.171	1	0.0916	1	0.155	1	regulation of striated muscle development	P
GO:0016208	25	0.719	1	0.899	1	0.681	1	0.484	1	0.719	1	0.893	1	0.528	1	0.992	1	AMP binding	F
GO:0016209	60	0.555	1	0.533	1	0.41	1	0.337	1	0.541	1	0.818	1	0.712	1	0.281	1	antioxidant activity	F
GO:0016229	37	0.948	1	0.936	1	0.881	1	0.932	1	0.961	1	0.922	1	0.461	1	0.5	1	steroid dehydrogenase activity	F
GO:0016236	14	0.0266	1	0.00554	0.36	0.0279	1	0.224	1	0.0129	1	0.00215	0.161	0.629	1	0.345	1	macroautophagy	P
GO:0016247	43	0.703	1	0.929	1	0.992	1	0.806	1	0.484	1	0.911	1	0.479	1	0.922	1	channel regulator activity	F
GO:0016248	11	0.23	1	0.469	1	0.458	1	0.259	1	0.176	1	0.71	1	0.698	1	0.245	1	channel inhibitor activity	F
GO:0016251	37	5.69e-06	0.007	0.000404	0.069	0.00276	0.248	0.0028	0.147	3.67e-05	0.005	0.00431	0.27	0.00363	0.357	0.0576	1	general RNA polymerase II transcription factor activity	F
GO:0016254	17	0.306	1	0.969	1	0.982	1	0.743	1	0.176	1	0.994	1	0.206	1	0.409	1	preassembly of GPI anchor in ER membrane	P
GO:0016265	932	2.17e-09	0.000806	8.79e-15	0	8.19e-08	0.00242	1.49e-09	0	2.45e-07	0.00169	2.12e-11	0	0.000135	0.025	2.12e-07	0.00188	death	P
GO:0016272	10	0.336	1	0.244	1	0.137	1	0.0394	1	0.265	1	0.461	1	0.999	1	0.893	1	prefoldin complex	C
GO:0016278	27	8.49e-05	0.0124	1.88e-06	0.00839	0.00584	0.46	0.00154	0.124	0.000113	0.017	2.75e-05	0.012	0.0542	1	0.0144	0.849	lysine N-methyltransferase activity	F
GO:0016279	27	8.49e-05	0.0124	1.88e-06	0.00839	0.00584	0.46	0.00154	0.124	0.000113	0.017	2.75e-05	0.012	0.0542	1	0.0144	0.849	protein-lysine N-methyltransferase activity	F
GO:0016282	16	8.68e-05	0.0124	0.000227	0.0419	0.00161	0.248	0.163	1	0.000311	0.0198	0.000633	0.0549	0.0283	1	0.132	1	eukaryotic 43S preinitiation complex	C
GO:0016284	11	0.628	1	0.2	1	0.945	1	0.276	1	0.555	1	0.354	1	0.265	1	0.0843	1	alanine aminopeptidase activity	F
GO:0016289	15	0.00107	0.096	0.0453	1	0.0376	1	0.00543	0.346	0.000391	0.022	0.158	1	0.179	1	0.136	1	CoA hydrolase activity	F
GO:0016298	108	0.894	1	0.913	1	0.488	1	0.998	1	0.967	1	0.811	1	0.346	1	0.269	1	lipase activity	F
GO:0016301	904	1.97e-08	0.000977	4.54e-15	0	4.92e-05	0.012	2.32e-09	0	6.74e-08	0.00169	7.32e-12	0	0.0127	0.63	5.74e-07	0.00188	kinase activity	F
GO:0016303	11	0.0265	1	0.155	1	0.017	0.693	0.0441	1	0.106	1	0.326	1	0.0836	1	0.14	1	phosphatidylinositol 3-kinase activity	F
GO:0016307	12	0.213	1	0.0542	1	0.407	1	0.0463	1	0.369	1	0.095	1	0.0706	1	0.258	1	phosphatidylinositol phosphate kinase activity	F
GO:0016310	858	3.58e-08	0.000977	3.15e-14	0	6.94e-05	0.012	5.66e-11	0	8.42e-08	0.00169	1.24e-10	0	0.0107	0.63	7.19e-06	0.00188	phosphorylation	P
GO:0016311	166	0.0721	1	0.000114	0.015	0.164	1	0.00374	0.202	0.089	1	0.000324	0.0307	0.241	1	0.0094	0.481	dephosphorylation	P
GO:0016323	133	0.462	1	0.0609	1	0.0696	1	0.0981	1	0.507	1	0.0461	1	0.981	1	0.718	1	basolateral plasma membrane	C
GO:0016324	97	0.68	1	0.11	1	0.216	1	0.297	1	0.732	1	0.137	1	0.864	1	0.365	1	apical plasma membrane	C
GO:0016327	105	0.0117	0.667	0.0062	0.36	0.0395	1	0.00275	0.147	0.0034	0.285	0.0176	0.881	0.43	1	0.197	1	apicolateral plasma membrane	C
GO:0016328	12	0.458	1	0.219	1	0.331	1	0.885	1	0.614	1	0.175	1	0.102	1	0.227	1	lateral plasma membrane	C
GO:0016331	54	0.557	1	0.528	1	0.562	1	0.709	1	0.411	1	0.548	1	0.812	1	0.138	1	morphogenesis of embryonic epithelium	P
GO:0016337	255	1	1	0.981	1	0.941	1	0.989	1	1	1	0.926	1	0.983	1	0.956	1	cell-cell adhesion	P
GO:0016338	21	0.214	1	0.0765	1	0.0365	1	0.303	1	0.257	1	0.0403	1	0.725	1	0.346	1	calcium-independent cell-cell adhesion	P
GO:0016339	23	1	1	1	1	0.998	1	1	1	0.999	1	1	1	0.751	1	0.996	1	calcium-dependent cell-cell adhesion	P
GO:0016358	38	0.384	1	0.585	1	0.304	1	0.395	1	0.328	1	0.695	1	0.725	1	0.472	1	dendrite development	P
GO:0016363	46	0.00163	0.202	0.000336	0.0419	0.0129	0.532	0.00456	0.346	0.0212	1	0.000563	0.0549	0.0102	0.63	0.0407	1	nuclear matrix	C
GO:0016407	71	0.000157	0.025	0.000285	0.0419	0.0187	1	0.146	1	0.000333	0.0198	0.000758	0.0549	0.0199	0.911	0.000834	0.0916	acetyltransferase activity	F
GO:0016408	12	0.178	1	0.0908	1	0.0586	1	0.315	1	0.253	1	0.174	1	0.896	1	0.139	1	C-acyltransferase activity	F
GO:0016409	14	0.267	1	0.491	1	0.674	1	0.512	1	0.176	1	0.513	1	0.398	1	0.311	1	palmitoyltransferase activity	F
GO:0016410	72	0.000595	0.0337	0.000403	0.069	0.0238	1	0.173	1	0.00111	0.078	0.000482	0.041	0.0144	0.647	0.0013	0.0916	N-acyltransferase activity	F
GO:0016411	15	0.0842	1	0.618	1	0.262	1	0.848	1	0.0325	1	0.425	1	0.783	1	0.508	1	acylglycerol O-acyltransferase activity	F
GO:0016439	31	0.807	1	0.401	1	0.921	1	0.355	1	0.737	1	0.359	1	0.54	1	0.677	1	tRNA-pseudouridine synthase activity	F
GO:0016444	26	0.315	1	0.0683	1	0.639	1	0.209	1	0.177	1	0.0613	1	0.854	1	0.384	1	somatic cell DNA recombination	P
GO:0016445	29	0.306	1	0.095	1	0.529	1	0.263	1	0.172	1	0.0711	1	0.936	1	0.55	1	somatic diversification of immunoglobulins	P
GO:0016447	26	0.315	1	0.0683	1	0.639	1	0.209	1	0.177	1	0.0613	1	0.854	1	0.384	1	somatic recombination of immunoglobulin gene segments	P
GO:0016455	16	0.0138	0.667	0.0342	1	0.00964	0.46	0.0522	1	0.0487	1	0.0289	1	0.129	1	0.578	1	RNA polymerase II transcription mediator activity	F
GO:0016458	31	0.0015	0.202	0.000886	0.069	0.0294	1	0.0126	0.818	0.00273	0.285	0.00829	0.739	0.0188	0.911	0.00121	0.0916	gene silencing	P
GO:0016459	59	0.503	1	0.00608	0.36	0.349	1	0.0316	1	0.598	1	0.00371	0.27	0.525	1	0.297	1	myosin complex	C
GO:0016462	767	2.92e-14	0	1.39e-12	0	1.06e-07	0.00242	0.000662	0.047	2.65e-12	0	1.16e-13	0	3.21e-06	0.00195	0.0001	0.02	pyrophosphatase activity	F
GO:0016469	51	0.00149	0.202	0.235	1	0.0384	1	0.0343	1	0.00213	0.285	0.434	1	0.042	1	0.555	1	proton-transporting two-sector ATPase complex	C
GO:0016477	357	0.942	1	0.831	1	0.619	1	0.559	1	0.967	1	0.928	1	0.696	1	0.428	1	cell migration	P
GO:0016478	12	0.0887	1	0.0068	0.36	0.123	1	0.13	1	0.0934	1	0.006	0.351	0.172	1	0.0413	1	negative regulation of translation	P
GO:0016481	351	8.08e-07	0.00195	1.13e-06	0.00839	0.00281	0.248	0.000246	0.027	3.29e-07	0.00169	5.55e-06	0.004	0.0717	1	0.00749	0.481	negative regulation of transcription	P
GO:0016485	107	0.0106	0.667	0.0246	1	0.0745	1	0.015	0.818	0.0129	1	0.0212	1	0.0391	1	0.781	1	protein processing	P
GO:0016491	896	0.00159	0.202	0.000861	0.069	0.00688	0.46	0.00371	0.202	0.0134	1	0.00299	0.239	0.00496	0.357	0.0913	1	oxidoreductase activity	F
GO:0016493	41	1	1	0.995	1	1	1	0.903	1	1	1	0.959	1	1	1	1	1	C-C chemokine receptor activity	F
GO:0016494	36	0.948	1	0.985	1	0.687	1	0.5	1	0.917	1	0.987	1	0.995	1	1	1	C-X-C chemokine receptor activity	F
GO:0016500	28	0.999	1	0.997	1	0.997	1	0.999	1	0.991	1	0.994	1	0.977	1	0.939	1	protein-hormone receptor activity	F
GO:0016502	136	0.997	1	0.998	1	0.985	1	0.991	1	0.994	1	0.988	1	0.949	1	0.996	1	nucleotide receptor activity	F
GO:0016503	12	0.361	1	0.419	1	0.329	1	0.995	1	0.411	1	0.28	1	0.219	1	0.143	1	pheromone receptor activity	F
GO:0016504	21	0.0339	1	0.214	1	0.0503	1	0.497	1	0.124	1	0.252	1	0.0731	1	0.128	1	protease activator activity	F
GO:0016505	17	0.0101	0.667	0.144	1	0.0207	1	0.509	1	0.0603	1	0.164	1	0.0564	1	0.101	1	apoptotic protease activator activity	F
GO:0016525	20	0.435	1	0.428	1	0.309	1	0.463	1	0.423	1	0.436	1	0.72	1	0.206	1	negative regulation of angiogenesis	P
GO:0016527	10	0.736	1	0.995	1	0.564	1	0.998	1	0.883	1	0.956	1	0.316	1	0.926	1	brain-specific angiogenesis inhibitor activity	F
GO:0016528	17	0.604	1	0.704	1	0.815	1	0.449	1	0.393	1	0.802	1	0.909	1	0.606	1	sarcoplasm	C
GO:0016529	14	0.491	1	0.451	1	0.732	1	0.317	1	0.33	1	0.486	1	0.822	1	0.595	1	sarcoplasmic reticulum	C
GO:0016540	63	0.0139	0.667	0.014	0.747	0.158	1	0.0141	0.818	0.0185	1	0.0117	0.739	0.00717	0.544	0.614	1	protein autoprocessing	P
GO:0016558	10	0.135	1	0.105	1	0.246	1	0.24	1	0.157	1	0.062	1	0.171	1	0.212	1	protein import into peroxisome matrix	P
GO:0016563	329	6.67e-07	0.00195	4.4e-07	0.00839	2.36e-06	0.00242	0.000244	0.027	4.83e-06	0.0026	5.34e-06	0.004	0.0711	1	0.00496	0.36	transcriptional activator activity	F
GO:0016564	243	0.000587	0.0337	0.00141	0.091	0.00777	0.46	0.00795	0.455	0.000263	0.017	0.00614	0.351	0.527	1	0.0218	1	transcriptional repressor activity	F
GO:0016566	21	0.611	1	0.962	1	0.819	1	0.999	1	0.554	1	0.827	1	0.379	1	0.809	1	specific transcriptional repressor activity	F
GO:0016567	104	0.00338	0.273	0.00197	0.129	0.00546	0.419	0.0396	1	0.0185	1	0.000784	0.0549	0.353	1	0.265	1	protein ubiquitination	P
GO:0016568	211	1.15e-11	0	4.29e-17	0	1.41e-06	0.00242	1.12e-07	0.00196	1.44e-11	0	1.53e-15	0	0.0118	0.63	1.01e-06	0.00188	chromatin modification	P
GO:0016569	56	0.000322	0.0337	2.34e-05	0.00958	0.006	0.46	0.00193	0.124	0.000439	0.022	3.56e-05	0.012	0.108	1	0.00255	0.185	covalent chromatin modification	P
GO:0016570	53	0.00123	0.202	0.000155	0.015	0.0111	0.532	0.00635	0.364	0.0017	0.176	0.00012	0.017	0.192	1	0.0126	0.647	histone modification	P
GO:0016571	15	0.0122	0.667	0.00326	0.197	0.283	1	0.0037	0.202	0.00937	0.539	0.0121	0.739	0.158	1	0.0665	1	histone methylation	P
GO:0016573	14	0.00513	0.328	0.000391	0.069	0.0201	1	0.0432	1	0.00611	0.539	0.000581	0.0549	0.293	1	0.0117	0.647	histone acetylation	P
GO:0016575	14	0.228	1	0.243	1	0.0478	1	0.454	1	0.46	1	0.0938	1	0.383	1	0.775	1	histone deacetylation	P
GO:0016585	31	0.0269	1	0.00491	0.36	0.21	1	0.00128	0.115	0.00743	0.539	0.0188	1	0.176	1	0.0176	1	chromatin remodeling complex	C
GO:0016591	95	2.25e-07	0.00195	6.18e-07	0.00839	0.000103	0.012	6.83e-05	0.012	8.48e-06	0.00288	2.02e-06	0.00297	0.000517	0.065	0.162	1	DNA-directed RNA polymerase II, holoenzyme	C
GO:0016597	20	0.873	1	0.925	1	0.555	1	0.915	1	0.973	1	0.948	1	0.295	1	0.434	1	amino acid binding	F
GO:0016599	16	0.0457	1	0.419	1	0.0425	1	0.931	1	0.0948	1	0.451	1	0.0525	1	0.151	1	caveolar membrane	C
GO:0016601	14	0.273	1	0.801	1	0.317	1	0.77	1	0.195	1	0.845	1	0.866	1	0.344	1	Rac protein signal transduction	P
GO:0016604	120	1.37e-09	0.000806	2.72e-08	0.00497	1.11e-05	0.003	0.000266	0.027	1.09e-08	0.000964	8.31e-08	0.000837	0.0379	1	0.00193	0.14	nuclear body	C
GO:0016605	21	0.0211	1	0.00133	0.091	0.0383	1	0.0138	0.818	0.0101	0.539	0.00107	0.0549	0.84	1	0.259	1	PML body	C
GO:0016607	83	3.3e-07	0.00195	2.16e-05	0.00958	0.000697	0.045	0.00101	0.083	2.36e-06	0.0026	0.000193	0.026	0.0143	0.647	0.00147	0.0916	nuclear speck	C
GO:0016614	151	0.259	1	0.255	1	0.13	1	0.094	1	0.648	1	0.496	1	0.0427	1	0.0772	1	oxidoreductase activity, acting on CH-OH group of donors	F
GO:0016616	134	0.232	1	0.365	1	0.0987	1	0.177	1	0.626	1	0.534	1	0.0481	1	0.127	1	oxidoreductase activity, acting on the CH-OH group of donors, NAD or NADP as acceptor	F
GO:0016620	23	0.00437	0.328	0.443	1	0.0112	0.532	0.435	1	0.0107	0.539	0.32	1	0.413	1	0.802	1	oxidoreductase activity, acting on the aldehyde or oxo group of donors, NAD or NADP as acceptor	F
GO:0016627	91	0.278	1	0.438	1	0.237	1	0.24	1	0.327	1	0.515	1	0.429	1	0.42	1	oxidoreductase activity, acting on the CH-CH group of donors	F
GO:0016628	57	0.375	1	0.45	1	0.321	1	0.209	1	0.431	1	0.606	1	0.418	1	0.24	1	oxidoreductase activity, acting on the CH-CH group of donors, NAD or NADP as acceptor	F
GO:0016634	10	0.44	1	0.596	1	0.598	1	0.52	1	0.336	1	0.566	1	0.472	1	0.632	1	oxidoreductase activity, acting on the CH-CH group of donors, oxygen as acceptor	F
GO:0016638	17	0.27	1	0.15	1	0.899	1	0.303	1	0.181	1	0.097	1	0.225	1	0.509	1	oxidoreductase activity, acting on the CH-NH2 group of donors	F
GO:0016641	14	0.402	1	0.276	1	0.889	1	0.453	1	0.3	1	0.198	1	0.28	1	0.554	1	oxidoreductase activity, acting on the CH-NH2 group of donors, oxygen as acceptor	F
GO:0016645	29	0.147	1	0.0293	1	0.168	1	0.00456	0.346	0.155	1	0.0735	1	0.501	1	0.7	1	oxidoreductase activity, acting on the CH-NH group of donors	F
GO:0016646	19	0.156	1	0.0422	1	0.184	1	0.0193	1	0.155	1	0.0526	1	0.569	1	0.721	1	oxidoreductase activity, acting on the CH-NH group of donors, NAD or NADP as acceptor	F
GO:0016651	75	0.0019	0.202	0.0188	1	0.0515	1	0.115	1	0.00264	0.285	0.0498	1	0.018	0.911	0.03	1	oxidoreductase activity, acting on NADH or NADPH	F
GO:0016652	10	0.0221	1	0.0315	1	0.0515	1	0.0923	1	0.0226	1	0.0133	0.739	0.072	1	0.177	1	oxidoreductase activity, acting on NADH or NADPH, NAD or NADP as acceptor	F
GO:0016655	50	0.00395	0.328	0.0412	1	0.0727	1	0.12	1	0.0065	0.539	0.109	1	0.0479	1	0.0604	1	oxidoreductase activity, acting on NADH or NADPH, quinone or similar compound as acceptor	F
GO:0016667	20	0.0206	1	0.116	1	0.0967	1	0.309	1	0.0774	1	0.2	1	0.0133	0.63	0.0799	1	oxidoreductase activity, acting on sulfur group of donors	F
GO:0016675	28	0.216	1	0.0664	1	0.117	1	0.183	1	0.284	1	0.073	1	0.897	1	0.147	1	oxidoreductase activity, acting on heme group of donors	F
GO:0016676	28	0.216	1	0.0664	1	0.117	1	0.183	1	0.284	1	0.073	1	0.897	1	0.147	1	oxidoreductase activity, acting on heme group of donors, oxygen as acceptor	F
GO:0016679	12	0.024	1	0.246	1	0.0293	1	0.253	1	0.0339	1	0.213	1	0.361	1	0.589	1	oxidoreductase activity, acting on diphenols and related substances as donors	F
GO:0016681	12	0.024	1	0.246	1	0.0293	1	0.253	1	0.0339	1	0.213	1	0.361	1	0.589	1	oxidoreductase activity, acting on diphenols and related substances as donors, cytochrome as acceptor	F
GO:0016684	47	0.716	1	0.796	1	0.676	1	0.684	1	0.511	1	0.859	1	0.988	1	0.652	1	oxidoreductase activity, acting on peroxide as acceptor	F
GO:0016701	62	0.0336	1	0.000887	0.069	0.014	0.693	0.264	1	0.144	1	0.00036	0.0307	0.111	1	0.037	1	oxidoreductase activity, acting on single donors with incorporation of molecular oxygen	F
GO:0016702	61	0.0365	1	0.000781	0.069	0.0102	0.46	0.231	1	0.166	1	0.000253	0.026	0.124	1	0.055	1	oxidoreductase activity, acting on single donors with incorporation of molecular oxygen, incorporation of two atoms of oxygen	F
GO:0016705	135	0.916	1	0.806	1	0.682	1	0.992	1	0.911	1	0.458	1	0.747	1	0.946	1	oxidoreductase activity, acting on paired donors, with incorporation or reduction of molecular oxygen	F
GO:0016706	26	0.0721	1	0.00104	0.091	0.0397	1	0.0923	1	0.116	1	0.000247	0.026	0.342	1	0.168	1	oxidoreductase activity, acting on paired donors, with incorporation or reduction of molecular oxygen, 2-oxoglutarate as one donor, and incorporation of one atom each of oxygen into both donors	F
GO:0016709	35	0.893	1	0.874	1	0.953	1	0.894	1	0.818	1	0.672	1	0.632	1	0.995	1	oxidoreductase activity, acting on paired donors, with incorporation or reduction of molecular oxygen, NAD or NADH as one donor, and incorporation of one atom of oxygen	F
GO:0016712	40	0.934	1	0.994	1	0.871	1	1	1	0.916	1	0.851	1	0.735	1	0.982	1	oxidoreductase activity, acting on paired donors, with incorporation or reduction of molecular oxygen, reduced flavin or flavoprotein as one donor, and incorporation of one atom of oxygen	F
GO:0016740	1848	5.13e-19	0	3.48e-25	0	6.16e-09	0.000934	6.96e-14	0	1.58e-18	0	2.12e-20	0	0.000197	0.034	6.61e-10	0.000771	transferase activity	F
GO:0016741	189	1.47e-08	0.000977	1.82e-05	0.00958	0.000529	0.036	0.0136	0.818	3.57e-08	0.000964	0.000107	0.017	0.00399	0.357	0.00532	0.36	transferase activity, transferring one-carbon groups	F
GO:0016746	205	2.48e-06	0.00195	0.000416	0.069	0.00085	0.0756	0.136	1	2.8e-06	0.0026	0.000427	0.041	0.0179	0.911	0.0202	1	transferase activity, transferring acyl groups	F
GO:0016747	191	1.85e-06	0.00195	0.000471	0.069	0.00108	0.098	0.138	1	1.47e-06	0.0026	0.000454	0.041	0.0208	0.911	0.0258	1	transferase activity, transferring groups other than amino-acyl groups	F
GO:0016755	24	0.384	1	0.557	1	0.405	1	0.963	1	0.361	1	0.36	1	0.574	1	0.413	1	transferase activity, transferring amino-acyl groups	F
GO:0016757	256	0.791	1	0.146	1	0.919	1	0.238	1	0.562	1	0.0739	1	0.834	1	0.719	1	transferase activity, transferring glycosyl groups	F
GO:0016758	172	0.842	1	0.269	1	0.923	1	0.573	1	0.525	1	0.107	1	0.986	1	0.833	1	transferase activity, transferring hexosyl groups	F
GO:0016763	49	0.0569	1	0.0337	1	0.196	1	0.00251	0.147	0.121	1	0.102	1	0.0931	1	0.52	1	transferase activity, transferring pentosyl groups	F
GO:0016765	49	0.503	1	0.129	1	0.244	1	0.183	1	0.657	1	0.237	1	0.596	1	0.0791	1	transferase activity, transferring alkyl or aryl (other than methyl) groups	F
GO:0016769	30	0.00451	0.328	0.0669	1	0.00646	0.46	0.245	1	0.0114	0.539	0.119	1	0.319	1	0.0214	1	transferase activity, transferring nitrogenous groups	F
GO:0016772	1054	2.59e-12	0	5.86e-20	0	2.64e-06	0.00242	5.96e-13	0	1.66e-11	0	1.26e-15	0	0.00184	0.195	4.93e-08	0.00188	transferase activity, transferring phosphorus-containing groups	F
GO:0016773	809	2.52e-06	0.00195	2.54e-13	0	0.00134	0.098	2.51e-09	0	1.76e-06	0.0026	2.57e-10	0	0.0789	1	8.21e-06	0.00188	phosphotransferase activity, alcohol group as acceptor	F
GO:0016775	18	0.12	1	0.445	1	0.0463	1	0.86	1	0.186	1	0.438	1	0.519	1	0.0577	1	phosphotransferase activity, nitrogenous group as acceptor	F
GO:0016776	38	0.0393	1	0.018	1	0.112	1	0.0024	0.147	0.0571	1	0.186	1	0.131	1	0.0502	1	phosphotransferase activity, phosphate group as acceptor	F
GO:0016779	127	1.14e-05	0.007	2.08e-05	0.00958	0.00834	0.46	0.000148	0.017	1.61e-05	0.00419	0.000113	0.017	0.0617	1	0.0782	1	nucleotidyltransferase activity	F
GO:0016780	17	0.306	1	0.328	1	0.666	1	0.138	1	0.171	1	0.612	1	0.561	1	0.3	1	phosphotransferase activity, for other substituted phosphate groups	F
GO:0016782	54	0.697	1	0.462	1	0.274	1	0.585	1	0.68	1	0.44	1	0.876	1	0.379	1	transferase activity, transferring sulfur-containing groups	F
GO:0016787	2486	3.4e-21	0	1.81e-23	0	3.42e-12	0	1.2e-09	0	8.93e-19	0	5.32e-22	0	2.6e-06	0.00195	7.25e-09	0.000771	hydrolase activity	F
GO:0016788	726	3.26e-07	0.00195	2.9e-08	0.00497	1.53e-05	0.00372	6.34e-05	0.012	3.92e-06	0.0026	2.53e-07	0.000941	0.028	1	0.00128	0.0916	hydrolase activity, acting on ester bonds	F
GO:0016789	148	0.19	1	0.331	1	0.0284	1	0.595	1	0.384	1	0.409	1	0.293	1	0.0714	1	carboxylic ester hydrolase activity	F
GO:0016790	100	0.0422	1	0.00279	0.177	0.174	1	0.00365	0.202	0.023	1	0.0102	0.739	0.355	1	0.107	1	thiolester hydrolase activity	F
GO:0016791	272	8.75e-05	0.0124	4.75e-08	0.00497	0.013	0.532	0.00011	0.012	0.000279	0.017	6.07e-07	0.00297	0.00614	0.357	0.00016	0.02	phosphoric monoester hydrolase activity	F
GO:0016796	22	0.11	1	0.564	1	0.0778	1	0.507	1	0.155	1	0.739	1	0.389	1	0.259	1	exonuclease activity, active with either ribo- or deoxyribonucleic acids and producing 5'-phosphomonoesters	F
GO:0016798	155	0.109	1	0.076	1	0.421	1	0.164	1	0.0724	1	0.0896	1	0.204	1	0.247	1	hydrolase activity, acting on glycosyl bonds	F
GO:0016799	20	0.355	1	0.588	1	0.303	1	0.169	1	0.321	1	0.652	1	0.774	1	0.837	1	hydrolase activity, hydrolyzing N-glycosyl compounds	F
GO:0016805	13	0.042	1	0.0279	1	0.0976	1	0.0559	1	0.0539	1	0.188	1	0.107	1	0.159	1	dipeptidase activity	F
GO:0016806	12	0.522	1	0.244	1	0.769	1	0.363	1	0.681	1	0.23	1	0.144	1	0.221	1	dipeptidyl-peptidase and tripeptidyl-peptidase activity	F
GO:0016810	120	0.0269	1	0.0926	1	0.22	1	0.654	1	0.00932	0.539	0.0299	1	0.412	1	0.276	1	hydrolase activity, acting on carbon-nitrogen (but not peptide) bonds	F
GO:0016811	57	0.0349	1	0.156	1	0.335	1	0.914	1	0.0102	0.539	0.105	1	0.422	1	0.0213	1	hydrolase activity, acting on carbon-nitrogen (but not peptide) bonds, in linear amides	F
GO:0016812	11	0.979	1	0.872	1	0.72	1	0.576	1	1	1	0.843	1	0.659	1	0.899	1	hydrolase activity, acting on carbon-nitrogen (but not peptide) bonds, in cyclic amides	F
GO:0016813	13	0.207	1	0.17	1	0.159	1	0.153	1	0.29	1	0.157	1	0.375	1	0.543	1	hydrolase activity, acting on carbon-nitrogen (but not peptide) bonds, in linear amidines	F
GO:0016814	32	0.0341	1	0.0805	1	0.299	1	0.43	1	0.0214	1	0.0227	1	0.206	1	0.898	1	hydrolase activity, acting on carbon-nitrogen (but not peptide) bonds, in cyclic amidines	F
GO:0016817	773	2e-14	0	5.58e-13	0	8.67e-08	0.00242	0.000419	0.042	1.6e-12	0	5.78e-14	0	3.63e-06	0.002	6.84e-05	0.009	hydrolase activity, acting on acid anhydrides	F
GO:0016818	771	3.47e-14	0	1.31e-12	0	1.26e-07	0.00242	0.000507	0.047	2.61e-12	0	1.32e-13	0	4.08e-06	0.002	0.000111	0.02	hydrolase activity, acting on acid anhydrides, in phosphorus-containing anhydrides	F
GO:0016820	130	0.0799	1	0.162	1	0.502	1	0.188	1	0.0207	1	0.253	1	0.694	1	0.227	1	hydrolase activity, acting on acid anhydrides, catalyzing transmembrane movement of substances	F
GO:0016829	165	0.0651	1	0.015	1	0.00411	0.327	0.0178	1	0.156	1	0.0209	1	0.628	1	0.53	1	lyase activity	F
GO:0016830	45	0.214	1	0.143	1	0.0387	1	0.168	1	0.317	1	0.15	1	0.794	1	0.469	1	carbon-carbon lyase activity	F
GO:0016831	33	0.33	1	0.176	1	0.118	1	0.116	1	0.404	1	0.335	1	0.81	1	0.173	1	carboxy-lyase activity	F
GO:0016835	57	0.0276	1	0.0971	1	0.0278	1	0.0427	1	0.0628	1	0.106	1	0.205	1	0.687	1	carbon-oxygen lyase activity	F
GO:0016836	48	0.0188	1	0.0413	1	0.0116	0.532	0.033	1	0.07	1	0.0554	1	0.11	1	0.426	1	hydro-lyase activity	F
GO:0016846	16	0.121	1	0.588	1	0.0154	0.693	0.87	1	0.192	1	0.501	1	0.499	1	0.454	1	carbon-sulfur lyase activity	F
GO:0016849	21	0.99	1	0.255	1	0.985	1	0.343	1	0.954	1	0.203	1	0.859	1	0.481	1	phosphorus-oxygen lyase activity	F
GO:0016853	192	0.0504	1	0.132	1	0.156	1	0.136	1	0.0986	1	0.25	1	0.0497	1	0.12	1	isomerase activity	F
GO:0016854	17	0.571	1	0.846	1	0.498	1	0.851	1	0.705	1	0.935	1	0.255	1	0.31	1	racemase and epimerase activity	F
GO:0016857	10	0.492	1	0.641	1	0.639	1	0.824	1	0.457	1	0.778	1	0.681	1	0.197	1	racemase and epimerase activity, acting on carbohydrates and derivatives	F
GO:0016859	45	0.0139	0.667	0.0798	1	0.0306	1	0.312	1	0.0589	1	0.0628	1	0.00721	0.544	0.378	1	cis-trans isomerase activity	F
GO:0016860	40	0.523	1	0.204	1	0.818	1	0.289	1	0.537	1	0.212	1	0.264	1	0.294	1	intramolecular oxidoreductase activity	F
GO:0016861	11	0.625	1	0.545	1	0.238	1	0.5	1	0.794	1	0.668	1	0.593	1	0.374	1	intramolecular oxidoreductase activity, interconverting aldoses and ketoses	F
GO:0016862	10	0.235	1	0.14	1	0.315	1	0.0864	1	0.393	1	0.221	1	0.314	1	0.799	1	intramolecular oxidoreductase activity, interconverting keto- and enol-groups	F
GO:0016863	12	0.661	1	0.783	1	1	1	0.758	1	0.329	1	0.757	1	0.241	1	0.354	1	intramolecular oxidoreductase activity, transposing C=C bonds	F
GO:0016866	55	0.679	1	0.765	1	0.694	1	0.426	1	0.465	1	0.854	1	0.989	1	0.42	1	intramolecular transferase activity	F
GO:0016868	16	0.464	1	0.892	1	0.498	1	0.584	1	0.244	1	0.985	1	1	1	0.442	1	intramolecular transferase activity, phosphotransferases	F
GO:0016874	423	2.04e-09	0.000806	3.83e-11	0	3.73e-06	0.00266	1.15e-05	0.008	2.31e-09	0.000964	1.33e-10	0	0.22	1	0.000362	0.027	ligase activity	F
GO:0016875	73	0.00146	0.202	0.00495	0.36	0.00969	0.46	0.0768	1	0.0029	0.285	0.00736	0.53	0.106	1	0.0987	1	ligase activity, forming carbon-oxygen bonds	F
GO:0016876	73	0.00146	0.202	0.00495	0.36	0.00969	0.46	0.0768	1	0.0029	0.285	0.00736	0.53	0.106	1	0.0987	1	ligase activity, forming aminoacyl-tRNA and related compounds	F
GO:0016877	27	0.983	1	0.67	1	0.976	1	0.933	1	0.954	1	0.346	1	0.871	1	0.807	1	ligase activity, forming carbon-sulfur bonds	F
GO:0016878	18	0.997	1	0.518	1	0.968	1	0.962	1	0.991	1	0.228	1	0.899	1	0.503	1	acid-thiol ligase activity	F
GO:0016879	237	1.22e-06	0.00195	1.86e-08	0.00497	0.00257	0.248	7.24e-05	0.012	1.22e-07	0.00169	1.38e-07	0.00092	0.459	1	0.00439	0.36	ligase activity, forming carbon-nitrogen bonds	F
GO:0016881	198	1.14e-07	0.00185	1.7e-08	0.00497	0.000239	0.024	7.25e-05	0.012	1.51e-07	0.00169	1.67e-07	0.00092	0.095	1	0.0019	0.14	acid-amino acid ligase activity	F
GO:0016884	10	0.508	1	0.751	1	0.614	1	0.993	1	0.299	1	0.547	1	0.998	1	0.445	1	carbon-nitrogen ligase activity, with glutamine as amido-N-donor	F
GO:0016887	359	6.92e-07	0.00195	1.23e-06	0.00839	6.63e-05	0.012	0.00167	0.124	3.76e-06	0.0026	1.96e-06	0.00297	0.086	1	0.0183	1	ATPase activity	F
GO:0016891	23	0.105	1	0.0153	1	0.175	1	0.07	1	0.101	1	0.025	1	0.828	1	0.213	1	endoribonuclease activity, producing 5'-phosphomonoesters	F
GO:0016892	19	0.985	1	0.498	1	0.985	1	0.986	1	0.787	1	0.0994	1	0.925	1	0.805	1	endoribonuclease activity, producing 3'-phosphomonoesters	F
GO:0016893	29	0.0492	1	0.0194	1	0.0532	1	0.0925	1	0.0716	1	0.0527	1	0.698	1	0.0572	1	endonuclease activity, active with either ribo- or deoxyribonucleic acids and producing 5'-phosphomonoesters	F
GO:0016894	21	0.857	1	0.53	1	0.947	1	0.95	1	0.492	1	0.153	1	0.97	1	0.891	1	endonuclease activity, active with either ribo- or deoxyribonucleic acids and producing 3'-phosphomonoesters	F
GO:0016895	10	0.965	1	0.906	1	0.321	1	0.609	1	1	1	0.895	1	0.874	1	0.886	1	exodeoxyribonuclease activity, producing 5'-phosphomonoesters	F
GO:0016896	13	0.00743	0.634	0.204	1	0.0629	1	0.227	1	0.00849	0.539	0.499	1	0.108	1	0.117	1	exoribonuclease activity, producing 5'-phosphomonoesters	F
GO:0016903	32	0.0138	0.667	0.334	1	0.0158	0.693	0.317	1	0.0291	1	0.281	1	0.347	1	0.794	1	oxidoreductase activity, acting on the aldehyde or oxo group of donors	F
GO:0016917	56	0.982	1	1	1	0.999	1	1	1	0.968	1	0.996	1	0.553	1	0.998	1	GABA receptor activity	F
GO:0016918	12	0.547	1	0.604	1	0.729	1	0.95	1	0.609	1	0.418	1	0.15	1	0.569	1	retinal binding	F
GO:0016986	27	0.00383	0.328	0.00781	0.36	0.0637	1	0.217	1	0.00474	0.418	0.0122	0.739	0.22	1	0.00262	0.185	transcription initiation factor activity	F
GO:0016998	17	0.804	1	0.565	1	0.761	1	0.366	1	0.906	1	0.727	1	0.227	1	0.474	1	cell wall catabolism	P
GO:0017004	10	0.733	1	0.561	1	0.454	1	0.307	1	0.8	1	0.928	1	0.71	1	0.426	1	cytochrome complex assembly	P
GO:0017015	26	0.354	1	0.111	1	0.231	1	0.00894	0.713	0.353	1	0.253	1	0.726	1	0.489	1	regulation of transforming growth factor beta receptor signaling pathway	P
GO:0017016	66	0.332	1	0.0524	1	0.758	1	0.388	1	0.249	1	0.124	1	0.38	1	0.00379	0.185	Ras GTPase binding	F
GO:0017017	13	0.823	1	0.906	1	0.512	1	0.672	1	0.62	1	0.909	1	1	1	0.259	1	MAP kinase phosphatase activity	F
GO:0017022	20	0.292	1	0.00602	0.36	0.421	1	0.0262	1	0.241	1	0.00182	0.161	0.463	1	0.264	1	myosin binding	F
GO:0017038	122	4.14e-06	0.007	3.25e-08	0.00497	0.0168	0.693	0.00216	0.124	5.69e-06	0.00288	4.66e-08	0.000837	0.0032	0.195	0.00968	0.481	protein import	P
GO:0017040	10	0.0902	1	0.206	1	0.451	1	0.859	1	0.0753	1	0.239	1	0.128	1	0.0327	1	ceramidase activity	F
GO:0017046	12	0.772	1	0.985	1	0.47	1	0.792	1	0.887	1	0.999	1	0.245	1	0.628	1	peptide hormone binding	F
GO:0017048	28	0.467	1	0.0576	1	0.873	1	0.162	1	0.378	1	0.0615	1	0.414	1	0.0682	1	Rho GTPase binding	F
GO:0017053	12	0.419	1	0.626	1	0.434	1	0.0756	1	0.485	1	0.719	1	0.298	1	0.8	1	transcriptional repressor complex	C
GO:0017076	2028	1.18e-26	0	1.14e-36	0	7.39e-15	0	2.75e-16	0	3.07e-23	0	2.02e-34	0	8.64e-09	0	4.16e-09	0.000771	purine nucleotide binding	F
GO:0017111	739	1.41e-14	0	1.69e-12	0	4.26e-08	0.000968	0.000652	0.047	1.24e-12	0	1.71e-13	0	6.17e-06	0.002	0.000112	0.02	nucleoside-triphosphatase activity	F
GO:0017124	30	0.805	1	0.0242	1	0.37	1	0.149	1	0.956	1	0.0124	0.739	0.195	1	0.318	1	SH3 domain binding	F
GO:0017127	11	0.29	1	0.764	1	0.307	1	0.568	1	0.213	1	0.685	1	0.779	1	0.939	1	cholesterol transporter activity	F
GO:0017137	21	0.443	1	0.493	1	0.57	1	0.985	1	0.465	1	0.488	1	0.348	1	0.0814	1	Rab GTPase binding	F
GO:0017148	41	0.132	1	0.135	1	0.0666	1	0.57	1	0.306	1	0.0966	1	0.176	1	0.109	1	negative regulation of protein biosynthesis	P
GO:0017153	59	0.775	1	0.868	1	0.965	1	0.815	1	0.749	1	0.824	1	0.351	1	0.935	1	sodium:dicarboxylate symporter activity	F
GO:0017156	23	0.371	1	0.463	1	0.358	1	0.391	1	0.49	1	0.723	1	0.284	1	0.123	1	calcium ion-dependent exocytosis	P
GO:0017157	18	0.0109	0.667	0.0493	1	0.0424	1	0.111	1	0.00971	0.539	0.142	1	0.295	1	0.00436	0.36	regulation of exocytosis	P
GO:0018024	27	8.49e-05	0.0124	1.88e-06	0.00839	0.00584	0.46	0.00154	0.124	0.000113	0.017	2.75e-05	0.012	0.0542	1	0.0144	0.849	histone-lysine N-methyltransferase activity	F
GO:0018105	16	0.0531	1	0.0731	1	0.394	1	0.0633	1	0.0168	1	0.0861	1	0.603	1	0.418	1	peptidyl-serine phosphorylation	P
GO:0018108	69	0.165	1	0.289	1	0.0395	1	0.0561	1	0.221	1	0.432	1	0.622	1	0.889	1	peptidyl-tyrosine phosphorylation	P
GO:0018149	18	1	1	0.996	1	1	1	1	1	1	1	0.951	1	0.961	1	0.994	1	peptide cross-linking	P
GO:0018193	146	0.000483	0.0337	0.000108	0.015	0.00242	0.248	3.61e-05	0.008	0.000638	0.04	0.000953	0.0549	0.177	1	0.0702	1	peptidyl-amino acid modification	P
GO:0018205	10	0.0156	0.667	0.037	1	0.0745	1	0.0198	1	0.0115	0.539	0.0666	1	0.0544	1	0.137	1	peptidyl-lysine modification	P
GO:0018209	19	0.116	1	0.162	1	0.562	1	0.151	1	0.0577	1	0.144	1	0.456	1	0.563	1	peptidyl-serine modification	P
GO:0018212	71	0.123	1	0.16	1	0.0217	1	0.0472	1	0.193	1	0.249	1	0.566	1	0.733	1	peptidyl-tyrosine modification	P
GO:0018298	16	0.745	1	0.601	1	0.189	1	0.377	1	0.765	1	0.367	1	1	1	0.988	1	protein-chromophore linkage	P
GO:0018958	75	0.866	1	0.567	1	0.494	1	0.0843	1	0.909	1	0.769	1	0.776	1	0.33	1	phenol metabolism	P
GO:0019001	413	2.1e-07	0.00195	1.42e-06	0.00839	0.00138	0.098	0.0182	1	6.28e-07	0.00245	3.27e-07	0.00297	1.71e-05	0.00544	0.0157	0.849	guanyl nucleotide binding	F
GO:0019012	18	0.481	1	0.57	1	0.945	1	0.597	1	0.259	1	0.717	1	0.841	1	0.173	1	virion	C
GO:0019028	18	0.481	1	0.57	1	0.945	1	0.597	1	0.259	1	0.717	1	0.841	1	0.173	1	viral capsid	C
GO:0019048	15	0.00631	0.517	0.074	1	0.0321	1	0.167	1	0.0114	0.539	0.0819	1	0.0686	1	0.452	1	virus-host interaction	P
GO:0019058	55	0.0461	1	0.279	1	0.433	1	0.474	1	0.0318	1	0.208	1	0.0834	1	0.41	1	viral infectious cycle	P
GO:0019059	23	0.245	1	0.404	1	0.603	1	0.824	1	0.24	1	0.229	1	0.145	1	0.783	1	initiation of viral infection	P
GO:0019079	29	0.102	1	0.514	1	0.276	1	0.552	1	0.12	1	0.57	1	0.197	1	0.213	1	viral genome replication	P
GO:0019098	17	0.998	1	0.955	1	0.932	1	0.955	1	0.999	1	0.985	1	0.624	1	0.176	1	reproductive behavior	P
GO:0019104	11	0.505	1	0.255	1	0.479	1	0.107	1	0.435	1	0.371	1	0.724	1	0.677	1	DNA N-glycosylase activity	F
GO:0019198	18	0.84	1	0.668	1	0.596	1	0.622	1	0.922	1	0.665	1	0.606	1	0.601	1	transmembrane receptor protein phosphatase activity	F
GO:0019199	135	1	1	0.946	1	1	1	0.994	1	0.994	1	0.916	1	0.872	1	0.47	1	transmembrane receptor protein kinase activity	F
GO:0019200	31	0.191	1	0.139	1	0.763	1	0.742	1	0.073	1	0.0713	1	0.772	1	0.334	1	carbohydrate kinase activity	F
GO:0019201	22	0.255	1	0.0608	1	0.464	1	0.0181	1	0.297	1	0.206	1	0.237	1	0.365	1	nucleotide kinase activity	F
GO:0019205	50	0.00201	0.202	0.00205	0.129	0.0383	1	0.00197	0.124	0.00492	0.418	0.0164	0.86	0.0192	0.911	0.0254	1	nucleobase, nucleoside, nucleotide kinase activity	F
GO:0019206	14	0.0249	1	0.00146	0.091	0.397	1	0.021	1	0.026	1	0.00673	0.53	0.0703	1	0.0505	1	nucleoside kinase activity	F
GO:0019207	103	0.434	1	0.644	1	0.401	1	0.863	1	0.338	1	0.431	1	0.718	1	0.88	1	kinase regulator activity	F
GO:0019208	55	0.336	1	0.0148	1	0.511	1	0.0308	1	0.309	1	0.0366	1	0.461	1	0.033	1	phosphatase regulator activity	F
GO:0019209	20	0.172	1	0.671	1	0.155	1	0.995	1	0.132	1	0.385	1	0.994	1	0.898	1	kinase activator activity	F
GO:0019210	33	0.159	1	0.055	1	0.48	1	0.0475	1	0.0598	1	0.175	1	0.654	1	0.205	1	kinase inhibitor activity	F
GO:0019212	27	0.439	1	0.109	1	0.798	1	0.077	1	0.305	1	0.195	1	0.479	1	0.128	1	phosphatase inhibitor activity	F
GO:0019213	22	0.22	1	0.337	1	0.531	1	0.796	1	0.143	1	0.244	1	0.39	1	0.13	1	deacetylase activity	F
GO:0019216	52	0.0915	1	0.156	1	0.0631	1	0.342	1	0.167	1	0.228	1	0.1	1	0.0639	1	regulation of lipid metabolism	P
GO:0019217	23	0.261	1	0.119	1	0.38	1	0.199	1	0.335	1	0.224	1	0.102	1	0.073	1	regulation of fatty acid metabolism	P
GO:0019218	18	0.137	1	0.32	1	0.0744	1	0.423	1	0.192	1	0.32	1	0.2	1	0.198	1	regulation of steroid metabolism	P
GO:0019219	2764	1.44e-31	0	2.96e-41	0	2.61e-13	0	6.12e-17	0	1.66e-30	0	4.71e-37	0	1.32e-10	0	1.12e-15	0	regulation of nucleobase, nucleoside, nucleotide and nucleic acid metabolism	P
GO:0019220	124	0.577	1	0.315	1	0.125	1	0.175	1	0.704	1	0.388	1	0.671	1	0.486	1	regulation of phosphate metabolism	P
GO:0019221	45	0.639	1	0.973	1	0.369	1	0.806	1	0.682	1	0.938	1	0.728	1	0.972	1	cytokine and chemokine mediated signaling pathway	P
GO:0019222	3207	5.54e-37	0	0	0	1.46e-17	0	2.5e-20	0	1.35e-34	0	5.18e-44	0	1.42e-11	0	2.85e-19	0	regulation of metabolism	P
GO:0019226	363	0.841	1	0.564	1	0.672	1	0.119	1	0.774	1	0.608	1	0.837	1	0.924	1	transmission of nerve impulse	P
GO:0019229	20	1	1	0.998	1	0.983	1	1	1	1	1	0.999	1	0.575	1	0.72	1	regulation of vasoconstriction	P
GO:0019233	26	0.991	1	0.906	1	0.964	1	0.47	1	0.952	1	0.895	1	0.999	1	0.988	1	sensory perception of pain	P
GO:0019239	28	0.364	1	0.605	1	0.558	1	0.845	1	0.318	1	0.387	1	0.434	1	0.854	1	deaminase activity	F
GO:0019290	42	0.707	1	0.444	1	0.54	1	0.162	1	0.744	1	0.619	1	0.527	1	0.277	1	siderophore biosynthesis	P
GO:0019318	179	5.56e-05	0.011	0.0015	0.091	0.00134	0.098	0.00876	0.713	0.00012	0.017	0.0133	0.739	0.0779	1	0.00405	0.185	hexose metabolism	P
GO:0019319	32	0.176	1	0.112	1	0.28	1	0.434	1	0.181	1	0.221	1	0.293	1	0.0301	1	hexose biosynthesis	P
GO:0019320	88	0.000123	0.025	0.000488	0.069	0.000191	0.024	0.00297	0.147	0.000606	0.04	0.004	0.27	0.161	1	0.0199	1	hexose catabolism	P
GO:0019321	10	0.291	1	0.369	1	0.422	1	0.754	1	0.265	1	0.492	1	0.565	1	0.108	1	pentose metabolism	P
GO:0019362	31	0.0263	1	0.0432	1	0.00972	0.46	0.118	1	0.126	1	0.123	1	0.0429	1	0.0783	1	pyridine nucleotide metabolism	P
GO:0019363	13	0.103	1	0.336	1	0.093	1	0.172	1	0.161	1	0.459	1	0.2	1	0.388	1	pyridine nucleotide biosynthesis	P
GO:0019370	19	0.177	1	0.214	1	0.114	1	0.523	1	0.294	1	0.212	1	0.386	1	0.153	1	leukotriene biosynthesis	P
GO:0019395	38	0.106	1	0.14	1	0.206	1	0.42	1	0.0625	1	0.175	1	0.267	1	0.0574	1	fatty acid oxidation	P
GO:0019438	54	0.818	1	0.468	1	0.632	1	0.135	1	0.849	1	0.654	1	0.523	1	0.362	1	aromatic compound biosynthesis	P
GO:0019439	18	0.218	1	0.231	1	0.178	1	0.572	1	0.375	1	0.151	1	0.145	1	0.42	1	aromatic compound catabolism	P
GO:0019538	3787	1.15e-39	0	0	0	8.6e-19	0	1.31e-27	0	2.9e-37	0	0	0	9.81e-11	0	2.77e-20	0	protein metabolism	P
GO:0019540	42	0.707	1	0.444	1	0.54	1	0.162	1	0.744	1	0.619	1	0.527	1	0.277	1	siderophore biosynthesis from catechol	P
GO:0019674	14	0.342	1	0.408	1	0.0969	1	0.464	1	0.584	1	0.35	1	0.343	1	0.539	1	NAD metabolism	P
GO:0019717	53	0.0549	1	0.0554	1	0.162	1	0.124	1	0.0389	1	0.0431	1	0.249	1	0.753	1	synaptosome	C
GO:0019722	47	0.0647	1	0.221	1	0.00356	0.327	0.413	1	0.0902	1	0.196	1	0.748	1	0.487	1	calcium-mediated signaling	P
GO:0019724	119	0.745	1	0.515	1	0.708	1	0.497	1	0.678	1	0.408	1	0.753	1	0.9	1	B cell mediated immunity	P
GO:0019725	317	0.134	1	0.034	1	0.196	1	0.0291	1	0.239	1	0.025	1	0.0469	1	0.632	1	cell homeostasis	P
GO:0019748	95	0.0472	1	0.0591	1	0.0463	1	0.088	1	0.0669	1	0.121	1	0.528	1	0.0814	1	secondary metabolism	P
GO:0019751	38	0.0285	1	0.0205	1	0.0618	1	0.064	1	0.0758	1	0.0688	1	0.0989	1	0.0888	1	polyol metabolism	P
GO:0019752	667	6.3e-05	0.011	2.01e-06	0.00839	0.000609	0.036	0.000106	0.012	0.000173	0.017	3.54e-05	0.012	0.137	1	0.00466	0.36	carboxylic acid metabolism	P
GO:0019783	81	0.445	1	0.0129	0.747	0.598	1	0.0212	1	0.382	1	0.0261	1	0.426	1	0.195	1	small conjugating protein-specific protease activity	F
GO:0019787	177	2.64e-07	0.00195	9.01e-08	0.00497	0.000101	0.012	0.000205	0.027	7.72e-07	0.00245	5.06e-07	0.00297	0.0937	1	0.00273	0.185	small conjugating protein ligase activity	F
GO:0019825	37	0.638	1	0.997	1	0.837	1	1	1	0.75	1	0.976	1	0.0717	1	0.801	1	oxygen binding	F
GO:0019827	14	0.163	1	0.271	1	0.625	1	0.33	1	0.109	1	0.192	1	0.258	1	0.85	1	stem cell maintenance	P
GO:0019829	48	0.116	1	0.523	1	0.567	1	0.133	1	0.0909	1	0.597	1	0.164	1	0.892	1	cation-transporting ATPase activity	F
GO:0019835	24	0.445	1	0.247	1	0.305	1	0.0701	1	0.57	1	0.478	1	0.307	1	0.211	1	cytolysis	P
GO:0019838	100	0.919	1	0.993	1	0.877	1	0.908	1	0.879	1	0.985	1	0.872	1	0.988	1	growth factor binding	F
GO:0019840	17	0.812	1	0.688	1	0.878	1	0.809	1	0.859	1	0.544	1	0.225	1	0.591	1	isoprenoid binding	F
GO:0019841	12	0.527	1	0.57	1	0.685	1	0.685	1	0.61	1	0.502	1	0.118	1	0.395	1	retinol binding	F
GO:0019842	146	0.0304	1	0.00165	0.091	0.0111	0.532	0.0605	1	0.0931	1	0.00138	0.064	0.0997	1	0.0206	1	vitamin binding	F
GO:0019843	20	4.39e-05	0.01	0.000789	0.069	0.00171	0.248	0.152	1	0.000159	0.017	0.0346	1	0.115	1	0.0174	1	rRNA binding	F
GO:0019861	86	0.601	1	0.36	1	0.418	1	0.303	1	0.724	1	0.632	1	0.274	1	0.0893	1	flagellum	C
GO:0019865	16	0.493	1	0.636	1	0.766	1	0.495	1	0.275	1	0.635	1	0.681	1	0.453	1	immunoglobulin binding	F
GO:0019866	305	3.59e-15	0	1.54e-07	0.00497	1.33e-06	0.00242	0.000778	0.047	3.83e-15	0	1.1e-07	0.000837	0.00821	0.63	0.0558	1	organelle inner membrane	C
GO:0019867	95	0.000413	0.0337	3.67e-05	0.00958	0.00969	0.46	0.00351	0.202	0.000193	0.017	0.000151	0.017	0.316	1	0.00373	0.185	outer membrane	C
GO:0019882	73	0.805	1	0.987	1	0.939	1	0.88	1	0.878	1	0.979	1	0.0828	1	0.883	1	antigen processing and presentation	P
GO:0019883	10	0.332	1	0.315	1	0.48	1	0.177	1	0.287	1	0.527	1	0.371	1	0.691	1	antigen processing and presentation of endogenous antigen	P
GO:0019884	10	0.144	1	0.461	1	0.482	1	0.568	1	0.136	1	0.363	1	0.207	1	0.735	1	antigen processing and presentation of exogenous antigen	P
GO:0019887	85	0.7	1	0.799	1	0.586	1	0.91	1	0.625	1	0.619	1	0.781	1	0.894	1	protein kinase regulator activity	F
GO:0019888	53	0.263	1	0.00872	0.503	0.403	1	0.0192	1	0.247	1	0.0248	1	0.395	1	0.0311	1	protein phosphatase regulator activity	F
GO:0019897	44	0.101	1	0.0739	1	0.409	1	0.267	1	0.162	1	0.026	1	0.0171	0.911	0.783	1	extrinsic to plasma membrane	C
GO:0019898	83	0.139	1	0.0408	1	0.196	1	0.28	1	0.228	1	0.0127	0.739	0.122	1	0.658	1	extrinsic to membrane	C
GO:0019899	297	8.35e-08	0.00184	6.98e-08	0.00497	0.000108	0.012	0.000205	0.027	1.78e-07	0.00169	1.22e-06	0.00297	0.00231	0.195	0.000637	0.0916	enzyme binding	F
GO:0019900	105	0.00227	0.202	0.00166	0.091	0.000508	0.036	0.0323	1	0.00654	0.539	0.00165	0.161	0.176	1	0.189	1	kinase binding	F
GO:0019901	88	0.00285	0.239	0.00158	0.091	0.00205	0.248	0.0767	1	0.00368	0.285	0.000584	0.0549	0.334	1	0.204	1	protein kinase binding	F
GO:0019902	21	0.166	1	0.276	1	0.402	1	0.191	1	0.0914	1	0.545	1	0.384	1	0.0779	1	phosphatase binding	F
GO:0019903	16	0.169	1	0.45	1	0.192	1	0.215	1	0.13	1	0.845	1	0.446	1	0.109	1	protein phosphatase binding	F
GO:0019904	160	0.00151	0.202	0.000277	0.0419	0.00251	0.248	0.00578	0.346	0.0121	0.539	0.000611	0.0549	0.0165	0.663	0.102	1	protein domain specific binding	F
GO:0019905	24	0.268	1	0.79	1	0.0555	1	0.576	1	0.545	1	0.835	1	0.137	1	0.939	1	syntaxin binding	F
GO:0019915	12	0.347	1	0.548	1	0.552	1	0.221	1	0.348	1	0.7	1	0.45	1	0.617	1	sequestering of lipid	P
GO:0019932	282	0.752	1	0.872	1	0.684	1	0.871	1	0.61	1	0.826	1	0.666	1	0.723	1	second-messenger-mediated signaling	P
GO:0019933	99	0.997	1	0.97	1	1	1	0.93	1	0.971	1	0.978	1	0.97	1	0.569	1	cAMP-mediated signaling	P
GO:0019935	133	0.999	1	0.998	1	0.998	1	0.969	1	0.994	1	0.999	1	0.943	1	0.861	1	cyclic-nucleotide-mediated signaling	P
GO:0019941	233	2.64e-06	0.00195	2.02e-10	0	0.00669	0.46	3.75e-06	0.008	1.7e-05	0.00419	5.19e-09	0.000837	0.000921	0.0707	0.000143	0.02	modification-dependent protein catabolism	P
GO:0019953	399	0.0903	1	0.0657	1	0.522	1	0.119	1	0.137	1	0.0404	1	0.00942	0.63	0.596	1	sexual reproduction	P
GO:0019955	137	1	1	0.995	1	0.979	1	0.718	1	0.996	1	0.994	1	1	1	0.999	1	cytokine binding	F
GO:0019956	60	1	1	1	1	0.994	1	0.945	1	0.999	1	1	1	1	1	1	1	chemokine binding	F
GO:0019957	41	1	1	0.995	1	1	1	0.903	1	1	1	0.959	1	1	1	1	1	C-C chemokine binding	F
GO:0019958	37	0.956	1	0.991	1	0.689	1	0.557	1	0.932	1	0.991	1	0.993	1	1	1	C-X-C chemokine binding	F
GO:0019959	11	1	1	0.859	1	0.771	1	0.317	1	1	1	0.866	1	0.999	1	1	1	interleukin-8 binding	F
GO:0019965	66	0.978	1	0.914	1	0.928	1	0.782	1	0.937	1	0.866	1	0.998	1	0.982	1	interleukin binding	F
GO:0019966	30	1	1	1	1	1	1	1	1	1	1	1	1	0.999	1	1	1	interleukin-1 binding	F
GO:0019992	65	0.214	1	0.00416	0.197	0.0215	1	0.0133	0.818	0.374	1	0.00571	0.351	0.745	1	0.218	1	diacylglycerol binding	F
GO:0020037	165	0.981	1	0.998	1	0.999	1	1	1	0.904	1	0.985	1	0.743	1	0.736	1	heme binding	F
GO:0021510	30	0.998	1	1	1	0.755	1	0.996	1	0.997	1	1	1	1	1	0.985	1	spinal cord development	P
GO:0021515	22	0.998	1	1	1	0.541	1	0.996	1	1	1	1	1	1	1	0.994	1	cell differentiation in spinal cord	P
GO:0021516	10	1	1	1	1	0.81	1	1	1	1	1	1	1	0.997	1	1	1	dorsal spinal cord development	P
GO:0021517	13	0.906	1	0.989	1	0.38	1	0.889	1	0.949	1	0.994	1	0.987	1	0.77	1	ventral spinal cord development	P
GO:0021522	11	0.93	1	0.959	1	0.383	1	0.816	1	0.976	1	0.977	1	0.993	1	0.622	1	spinal cord motor neuron differentiation	P
GO:0021536	24	0.998	1	0.998	1	0.988	1	0.909	1	0.996	1	0.998	1	0.995	1	0.992	1	diencephalon development	P
GO:0021537	38	0.217	1	0.936	1	0.383	1	0.617	1	0.184	1	0.929	1	0.213	1	0.964	1	telencephalon development	P
GO:0021543	27	0.0694	1	0.82	1	0.102	1	0.418	1	0.0815	1	0.83	1	0.104	1	0.924	1	pallium development	P
GO:0021545	10	0.842	1	0.84	1	0.99	1	0.833	1	0.721	1	0.784	1	0.6	1	0.794	1	cranial nerve development	P
GO:0021549	17	0.682	1	0.844	1	0.638	1	0.725	1	0.682	1	0.748	1	0.602	1	0.992	1	cerebellum development	P
GO:0021575	12	0.459	1	0.48	1	0.294	1	0.503	1	0.703	1	0.413	1	0.23	1	0.797	1	hindbrain morphogenesis	P
GO:0021587	11	0.454	1	0.458	1	0.333	1	0.48	1	0.634	1	0.403	1	0.3	1	0.788	1	cerebellum morphogenesis	P
GO:0021675	16	0.676	1	0.557	1	0.482	1	0.922	1	0.789	1	0.569	1	0.439	1	0.205	1	nerve development	P
GO:0021695	13	0.543	1	0.509	1	0.442	1	0.472	1	0.648	1	0.42	1	0.41	1	0.92	1	cerebellar cortex development	P
GO:0021696	11	0.454	1	0.458	1	0.333	1	0.48	1	0.634	1	0.403	1	0.3	1	0.788	1	cerebellar cortex morphogenesis	P
GO:0021700	86	0.863	1	0.68	1	0.472	1	0.166	1	0.709	1	0.766	1	0.989	1	0.943	1	developmental maturation	P
GO:0021761	17	0.162	1	0.821	1	0.361	1	0.265	1	0.155	1	0.887	1	0.236	1	0.961	1	limbic system development	P
GO:0021766	13	0.0415	1	0.397	1	0.134	1	0.0538	1	0.0757	1	0.57	1	0.12	1	0.756	1	hippocampus development	P
GO:0021782	15	0.106	1	0.913	1	0.0521	1	0.516	1	0.139	1	0.959	1	0.228	1	0.961	1	glial cell development	P
GO:0021795	10	0.132	1	0.785	1	0.171	1	0.799	1	0.0954	1	0.72	1	0.2	1	0.839	1	cerebral cortex cell migration	P
GO:0021872	12	0.993	1	0.989	1	0.965	1	0.882	1	0.992	1	0.985	1	0.993	1	0.944	1	generation of neurons in the forebrain	P
GO:0021879	10	0.987	1	0.967	1	0.893	1	0.813	1	0.987	1	0.948	1	0.998	1	0.973	1	forebrain neuron differentiation	P
GO:0021885	12	0.24	1	0.869	1	0.357	1	0.918	1	0.172	1	0.846	1	0.281	1	0.408	1	forebrain cell migration	P
GO:0021895	10	0.622	1	0.553	1	0.744	1	0.437	1	0.524	1	0.512	1	0.526	1	0.745	1	cerebral cortex neuron differentiation	P
GO:0021915	48	0.803	1	0.669	1	0.484	1	0.806	1	0.726	1	0.637	1	0.956	1	0.235	1	neural tube development	P
GO:0021953	27	0.687	1	0.873	1	0.588	1	0.56	1	0.592	1	0.847	1	0.72	1	0.946	1	central nervous system neuron differentiation	P
GO:0021954	24	0.715	1	0.939	1	0.738	1	0.712	1	0.533	1	0.897	1	0.828	1	0.964	1	central nervous system neuron development	P
GO:0021955	10	0.495	1	0.774	1	0.901	1	0.612	1	0.352	1	0.678	1	0.535	1	0.946	1	central nervous system neuron axonogenesis	P
GO:0021983	19	0.996	1	0.992	1	0.95	1	0.888	1	0.997	1	0.992	1	0.994	1	1	1	pituitary gland development	P
GO:0021987	20	0.0188	1	0.572	1	0.0225	1	0.387	1	0.0222	1	0.509	1	0.103	1	0.807	1	cerebral cortex development	P
GO:0022008	420	0.81	1	0.97	1	0.526	1	0.888	1	0.647	1	0.952	1	0.991	1	0.911	1	neurogenesis	P
GO:0022029	11	0.168	1	0.827	1	0.261	1	0.868	1	0.11	1	0.8	1	0.24	1	0.481	1	telencephalon cell migration	P
GO:0022037	21	0.303	1	0.789	1	0.24	1	0.668	1	0.354	1	0.648	1	0.371	1	0.988	1	metencephalon development	P
GO:0030001	613	0.381	1	0.255	1	0.436	1	0.488	1	0.313	1	0.129	1	0.795	1	0.716	1	metal ion transport	P
GO:0030003	197	0.379	1	0.434	1	0.354	1	0.214	1	0.547	1	0.288	1	0.086	1	0.996	1	cation homeostasis	P
GO:0030004	18	0.265	1	0.242	1	0.416	1	0.61	1	0.3	1	0.129	1	0.17	1	0.645	1	monovalent inorganic cation homeostasis	P
GO:0030005	175	0.453	1	0.578	1	0.427	1	0.317	1	0.595	1	0.434	1	0.133	1	0.992	1	di-, tri-valent inorganic cation homeostasis	P
GO:0030010	11	0.263	1	0.562	1	0.438	1	0.885	1	0.463	1	0.596	1	0.0169	0.911	0.169	1	establishment of cell polarity	P
GO:0030016	79	0.889	1	0.273	1	0.49	1	0.26	1	0.851	1	0.199	1	0.995	1	0.601	1	myofibril	C
GO:0030017	74	0.879	1	0.296	1	0.613	1	0.222	1	0.816	1	0.24	1	0.985	1	0.641	1	sarcomere	C
GO:0030018	26	0.648	1	0.429	1	0.558	1	0.447	1	0.567	1	0.54	1	0.94	1	0.175	1	Z disc	C
GO:0030027	55	0.0187	1	0.0364	1	0.00594	0.46	0.118	1	0.0727	1	0.124	1	0.195	1	0.00777	0.481	lamellipodium	C
GO:0030029	262	0.00287	0.239	0.00347	0.197	0.00118	0.098	0.0302	1	0.00777	0.539	0.004	0.27	0.339	1	0.0867	1	actin filament-based process	P
GO:0030030	317	0.729	1	0.711	1	0.41	1	0.755	1	0.652	1	0.692	1	0.895	1	0.388	1	cell projection organization and biogenesis	P
GO:0030031	80	0.0324	1	0.0278	1	0.104	1	0.255	1	0.0313	1	0.0204	1	0.159	1	0.0917	1	cell projection biogenesis	P
GO:0030032	13	0.109	1	0.108	1	0.116	1	0.476	1	0.141	1	0.101	1	0.194	1	0.2	1	lamellipodium biogenesis	P
GO:0030035	18	0.179	1	0.13	1	0.106	1	0.147	1	0.219	1	0.117	1	0.156	1	0.383	1	microspike biogenesis	P
GO:0030036	236	0.00247	0.202	0.00421	0.197	0.00179	0.248	0.0358	1	0.00475	0.418	0.00623	0.351	0.324	1	0.0496	1	actin cytoskeleton organization and biogenesis	P
GO:0030041	37	0.0727	1	0.102	1	0.278	1	0.273	1	0.0397	1	0.0842	1	0.506	1	0.38	1	actin filament polymerization	P
GO:0030042	25	0.0895	1	0.427	1	0.0353	1	0.251	1	0.182	1	0.537	1	0.718	1	0.594	1	actin filament depolymerization	P
GO:0030048	20	0.285	1	0.146	1	0.156	1	0.134	1	0.391	1	0.115	1	0.472	1	0.539	1	actin filament-based movement	P
GO:0030054	455	0.345	1	0.163	1	0.162	1	0.183	1	0.198	1	0.102	1	0.966	1	0.744	1	cell junction	C
GO:0030055	47	0.426	1	0.281	1	0.0199	1	0.0961	1	0.537	1	0.238	1	0.991	1	0.995	1	cell-matrix junction	C
GO:0030072	40	0.817	1	0.67	1	0.469	1	0.819	1	0.788	1	0.57	1	0.972	1	0.65	1	peptide hormone secretion	P
GO:0030073	34	0.785	1	0.632	1	0.501	1	0.763	1	0.772	1	0.57	1	0.932	1	0.486	1	insulin secretion	P
GO:0030097	229	0.0856	1	0.132	1	0.331	1	0.158	1	0.0362	1	0.235	1	0.56	1	0.111	1	hemopoiesis	P
GO:0030098	102	0.22	1	0.242	1	0.217	1	0.353	1	0.182	1	0.287	1	0.705	1	0.165	1	lymphocyte differentiation	P
GO:0030099	105	0.153	1	0.199	1	0.399	1	0.248	1	0.119	1	0.27	1	0.43	1	0.258	1	myeloid cell differentiation	P
GO:0030100	41	0.0181	1	4.59e-05	0.00958	0.123	1	0.00954	0.713	0.00576	0.539	1.47e-05	0.00763	0.424	1	0.141	1	regulation of endocytosis	P
GO:0030101	19	0.933	1	0.865	1	0.984	1	0.954	1	0.93	1	0.791	1	0.152	1	0.487	1	natural killer cell activation	P
GO:0030111	32	0.098	1	0.0831	1	0.593	1	0.15	1	0.0711	1	0.0492	1	0.12	1	0.842	1	regulation of Wnt receptor signaling pathway	P
GO:0030117	65	1.44e-06	0.00195	1.82e-05	0.00958	0.000143	0.015	0.142	1	1.01e-05	0.004	1.67e-06	0.00297	0.000687	0.065	0.0889	1	membrane coat	C
GO:0030118	39	0.00034	0.0337	0.000247	0.0419	0.00157	0.248	0.226	1	0.00158	0.176	9.66e-06	0.00488	0.00532	0.357	0.459	1	clathrin coat	C
GO:0030119	30	0.00058	0.0337	0.00788	0.36	0.000576	0.036	0.242	1	0.00176	0.176	0.00129	0.064	0.0342	1	0.567	1	membrane coat adaptor complex	C
GO:0030120	35	0.00038	0.0337	0.000489	0.069	0.00976	0.46	0.118	1	0.000514	0.022	0.000268	0.026	0.0363	1	0.132	1	vesicle coat	C
GO:0030125	19	0.0284	1	0.00411	0.197	0.0917	1	0.151	1	0.0366	1	0.00305	0.239	0.0881	1	0.712	1	clathrin vesicle coat	C
GO:0030130	13	0.0658	1	0.0442	1	0.22	1	0.304	1	0.0575	1	0.0366	1	0.0894	1	0.755	1	clathrin coat of trans-Golgi network vesicle	C
GO:0030131	29	0.000403	0.0337	0.0049	0.36	0.0003	0.036	0.236	1	0.0017	0.176	0.000706	0.0549	0.0249	1	0.525	1	clathrin adaptor complex	C
GO:0030132	10	0.021	1	0.00796	0.36	0.159	1	0.747	1	0.0168	1	0.00387	0.27	0.132	1	0.25	1	clathrin coat of coated pit	C
GO:0030133	51	0.0605	1	0.06	1	0.177	1	0.195	1	0.0621	1	0.0598	1	0.187	1	0.497	1	transport vesicle	C
GO:0030135	135	0.000602	0.0337	0.00555	0.36	0.00246	0.248	0.0773	1	0.00123	0.078	0.00305	0.239	0.0634	1	0.268	1	coated vesicle	C
GO:0030136	114	0.0147	0.667	0.043	1	0.0247	1	0.104	1	0.0252	1	0.0271	1	0.107	1	0.617	1	clathrin-coated vesicle	C
GO:0030137	12	0.000832	0.083	0.0697	1	0.0729	1	0.564	1	0.000253	0.017	0.0338	1	0.194	1	0.0907	1	COPI-coated vesicle	C
GO:0030139	32	0.03	1	0.101	1	0.103	1	0.241	1	0.02	1	0.0731	1	0.168	1	0.373	1	endocytic vesicle	C
GO:0030140	23	0.0559	1	0.105	1	0.298	1	0.52	1	0.0569	1	0.0779	1	0.0673	1	0.461	1	trans-Golgi network transport vesicle	C
GO:0030141	90	0.484	1	0.348	1	0.55	1	0.323	1	0.408	1	0.359	1	0.537	1	0.484	1	secretory granule	C
GO:0030145	151	0.0413	1	0.0011	0.091	0.0362	1	0.00223	0.124	0.0465	1	0.00252	0.239	0.671	1	0.193	1	manganese ion binding	F
GO:0030148	22	0.116	1	0.0133	0.747	0.124	1	0.223	1	0.113	1	0.00835	0.739	0.368	1	0.137	1	sphingolipid biosynthesis	P
GO:0030149	16	0.0452	1	0.216	1	0.276	1	0.569	1	0.0462	1	0.264	1	0.12	1	0.134	1	sphingolipid catabolism	P
GO:0030154	1370	0.591	1	0.871	1	0.618	1	0.633	1	0.42	1	0.891	1	0.906	1	0.744	1	cell differentiation	P
GO:0030155	71	0.217	1	0.0875	1	0.445	1	0.0996	1	0.163	1	0.202	1	0.204	1	0.0782	1	regulation of cell adhesion	P
GO:0030159	19	0.218	1	0.147	1	0.0575	1	0.19	1	0.232	1	0.133	1	0.984	1	0.518	1	receptor signaling complex scaffold activity	F
GO:0030162	19	0.72	1	0.183	1	0.666	1	0.371	1	0.669	1	0.142	1	0.543	1	0.359	1	regulation of proteolysis	P
GO:0030163	296	4.63e-07	0.00195	1.87e-12	0	0.000262	0.036	3.76e-07	0.00196	1.7e-05	0.00419	2.98e-11	0	0.000664	0.065	0.000108	0.02	protein catabolism	P
GO:0030165	28	0.556	1	0.453	1	0.784	1	0.664	1	0.458	1	0.259	1	0.432	1	0.611	1	PDZ domain binding	F
GO:0030166	24	0.996	1	0.967	1	0.376	1	0.971	1	0.999	1	0.946	1	0.975	1	0.884	1	proteoglycan biosynthesis	P
GO:0030168	22	0.226	1	0.285	1	0.336	1	0.141	1	0.275	1	0.34	1	0.153	1	0.631	1	platelet activation	P
GO:0030169	17	0.136	1	0.252	1	0.892	1	0.666	1	0.0486	1	0.227	1	0.153	1	0.122	1	low-density lipoprotein binding	F
GO:0030170	58	0.0326	1	0.159	1	0.00868	0.46	0.22	1	0.112	1	0.243	1	0.14	1	0.134	1	pyridoxal phosphate binding	F
GO:0030173	40	0.443	1	0.0728	1	0.395	1	0.275	1	0.46	1	0.0451	1	0.266	1	0.217	1	integral to Golgi membrane	C
GO:0030175	17	0.0836	1	0.00225	0.177	0.126	1	0.128	1	0.0699	1	0.00307	0.239	0.453	1	0.0122	0.647	filopodium	C
GO:0030176	38	0.159	1	0.00137	0.091	0.216	1	0.194	1	0.152	1	0.000945	0.0549	0.661	1	0.134	1	integral to endoplasmic reticulum membrane	C
GO:0030178	20	0.318	1	0.474	1	0.508	1	0.228	1	0.443	1	0.449	1	0.162	1	0.931	1	negative regulation of Wnt receptor signaling pathway	P
GO:0030182	346	0.992	1	0.997	1	0.904	1	0.98	1	0.943	1	0.994	1	1	1	0.926	1	neuron differentiation	P
GO:0030183	52	0.397	1	0.876	1	0.355	1	0.873	1	0.355	1	0.692	1	0.669	1	0.989	1	B cell differentiation	P
GO:0030193	19	0.0363	1	0.187	1	0.0223	1	0.272	1	0.102	1	0.123	1	0.0823	1	0.618	1	regulation of blood coagulation	P
GO:0030195	15	0.0521	1	0.095	1	0.0593	1	0.131	1	0.0651	1	0.0771	1	0.254	1	0.406	1	negative regulation of blood coagulation	P
GO:0030198	95	0.982	1	0.752	1	0.416	1	0.0744	1	0.987	1	0.854	1	1	1	0.948	1	extracellular matrix organization and biogenesis	P
GO:0030199	16	0.998	1	0.967	1	1	1	0.861	1	0.963	1	0.979	1	1	1	0.466	1	collagen fibril organization	P
GO:0030201	13	0.977	1	0.957	1	0.95	1	0.408	1	0.769	1	0.978	1	0.83	1	0.998	1	heparan sulfate proteoglycan metabolism	P
GO:0030203	47	0.626	1	0.364	1	0.412	1	0.244	1	0.649	1	0.584	1	0.712	1	0.169	1	glycosaminoglycan metabolism	P
GO:0030216	39	0.759	1	0.891	1	0.803	1	0.947	1	0.631	1	0.862	1	0.915	1	0.489	1	keratinocyte differentiation	P
GO:0030217	62	0.245	1	0.0724	1	0.182	1	0.105	1	0.196	1	0.163	1	0.843	1	0.0377	1	T cell differentiation	P
GO:0030218	44	0.212	1	0.334	1	0.427	1	0.498	1	0.196	1	0.364	1	0.27	1	0.265	1	erythrocyte differentiation	P
GO:0030225	15	0.84	1	0.438	1	0.792	1	0.388	1	0.712	1	0.461	1	1	1	0.524	1	macrophage differentiation	P
GO:0030228	13	0.273	1	0.146	1	0.935	1	0.696	1	0.175	1	0.0709	1	0.182	1	0.15	1	lipoprotein receptor activity	F
GO:0030234	885	0.00425	0.328	0.00105	0.091	0.0193	1	0.0129	0.818	0.00385	0.285	0.00257	0.239	0.189	1	0.0261	1	enzyme regulator activity	F
GO:0030239	16	0.856	1	0.0697	1	0.267	1	0.0382	1	0.977	1	0.12	1	0.992	1	0.771	1	myofibril assembly	P
GO:0030246	330	0.987	1	0.723	1	0.939	1	0.891	1	0.978	1	0.518	1	0.886	1	0.745	1	carbohydrate binding	F
GO:0030247	114	0.954	1	0.975	1	0.57	1	0.94	1	0.964	1	0.924	1	0.926	1	0.964	1	polysaccharide binding	F
GO:0030258	37	0.283	1	0.0115	0.677	0.5	1	0.0318	1	0.436	1	0.0358	1	0.0109	0.63	0.0184	1	lipid modification	P
GO:0030260	11	0.616	1	0.235	1	0.919	1	0.358	1	0.571	1	0.209	1	0.294	1	0.308	1	entry into host cell	P
GO:0030261	23	0.00379	0.328	0.00734	0.36	0.372	1	0.000787	0.047	0.026	1	0.315	1	0.00757	0.544	0.00459	0.36	chromosome condensation	P
GO:0030262	23	0.131	1	0.0434	1	0.257	1	0.00764	0.455	0.139	1	0.142	1	0.408	1	0.551	1	apoptotic nuclear changes	P
GO:0030278	34	0.982	1	0.309	1	0.963	1	0.533	1	0.941	1	0.349	1	0.966	1	0.145	1	regulation of ossification	P
GO:0030279	11	0.886	1	0.227	1	0.463	1	0.402	1	0.891	1	0.204	1	1	1	0.438	1	negative regulation of ossification	P
GO:0030282	39	0.891	1	0.759	1	0.862	1	0.767	1	0.778	1	0.831	1	0.986	1	0.263	1	bone mineralization	P
GO:0030286	33	0.633	1	0.502	1	0.175	1	0.53	1	0.89	1	0.377	1	0.547	1	0.667	1	dynein complex	C
GO:0030288	27	0.765	1	0.882	1	0.581	1	0.992	1	0.853	1	0.719	1	0.416	1	0.703	1	periplasmic space (sensu Proteobacteria)	C
GO:0030295	14	0.272	1	0.683	1	0.18	1	1	1	0.23	1	0.405	1	0.988	1	0.862	1	protein kinase activator activity	F
GO:0030301	15	0.0788	1	0.303	1	0.0512	1	0.188	1	0.0798	1	0.385	1	0.504	1	0.508	1	cholesterol transport	P
GO:0030308	64	0.0687	1	0.00721	0.36	0.0693	1	0.0335	1	0.0432	1	0.0158	0.763	0.703	1	0.0642	1	negative regulation of cell growth	P
GO:0030312	31	0.842	1	0.931	1	0.614	1	0.989	1	0.924	1	0.824	1	0.425	1	0.792	1	external encapsulating structure	C
GO:0030313	28	0.77	1	0.912	1	0.582	1	0.996	1	0.864	1	0.763	1	0.385	1	0.745	1	cell envelope	C
GO:0030315	13	0.987	1	1	1	0.999	1	0.846	1	0.944	1	1	1	0.833	1	1	1	T-tubule	C
GO:0030316	17	0.915	1	0.797	1	0.96	1	0.918	1	0.825	1	0.775	1	0.934	1	0.26	1	osteoclast differentiation	P
GO:0030317	26	0.647	1	0.998	1	0.551	1	0.914	1	0.734	1	0.994	1	0.377	1	0.993	1	sperm motility	P
GO:0030318	17	0.413	1	0.388	1	0.797	1	0.658	1	0.416	1	0.435	1	0.158	1	0.15	1	melanocyte differentiation	P
GO:0030323	74	0.805	1	0.885	1	0.987	1	0.973	1	0.587	1	0.871	1	0.743	1	0.332	1	respiratory tube development	P
GO:0030324	71	0.852	1	0.896	1	0.989	1	0.964	1	0.65	1	0.896	1	0.798	1	0.359	1	lung development	P
GO:0030326	70	0.998	1	0.984	1	0.997	1	0.99	1	1	1	0.945	1	0.486	1	0.972	1	embryonic limb morphogenesis	P
GO:0030330	17	0.0328	1	0.266	1	0.136	1	0.375	1	0.0441	1	0.31	1	0.0421	1	0.303	1	DNA damage response, signal transduction by p53 class mediator	P
GO:0030334	87	0.378	1	0.656	1	0.157	1	0.497	1	0.389	1	0.717	1	0.714	1	0.573	1	regulation of cell migration	P
GO:0030335	35	0.73	1	0.827	1	0.262	1	0.694	1	0.832	1	0.863	1	0.9	1	0.403	1	positive regulation of cell migration	P
GO:0030336	26	0.178	1	0.288	1	0.309	1	0.185	1	0.138	1	0.454	1	0.236	1	0.169	1	negative regulation of cell migration	P
GO:0030374	28	0.0813	1	0.0268	1	0.0207	1	0.0291	1	0.107	1	0.0295	1	0.52	1	0.388	1	ligand-dependent nuclear receptor transcription coactivator activity	F
GO:0030375	11	0.881	1	0.208	1	0.756	1	0.287	1	0.773	1	0.203	1	0.999	1	0.336	1	thyroid hormone receptor coactivator activity	F
GO:0030384	65	0.000879	0.083	0.00244	0.177	0.0383	1	0.0117	0.818	0.0015	0.176	0.011	0.739	0.0251	1	0.0147	0.849	phosphoinositide metabolism	P
GO:0030414	183	1	1	1	1	1	1	0.999	1	1	1	1	1	0.823	1	1	1	protease inhibitor activity	F
GO:0030424	68	0.961	1	0.829	1	0.691	1	0.423	1	0.938	1	0.759	1	0.997	1	0.983	1	axon	C
GO:0030425	71	0.916	1	0.59	1	0.577	1	0.225	1	0.938	1	0.575	1	0.82	1	0.971	1	dendrite	C
GO:0030426	29	0.942	1	0.976	1	0.911	1	0.977	1	0.84	1	0.798	1	0.945	1	0.999	1	growth cone	C
GO:0030427	30	0.82	1	0.907	1	0.886	1	0.959	1	0.717	1	0.723	1	0.687	1	0.811	1	site of polarized growth	C
GO:0030433	18	0.021	1	2.66e-06	0.00839	0.0748	1	0.0469	1	0.0763	1	5.44e-05	0.017	0.0398	1	0.00888	0.481	ER-associated protein catabolism	P
GO:0030496	12	0.00925	0.667	0.0164	1	0.263	1	0.306	1	0.0111	0.539	0.02	1	0.337	1	0.0394	1	midbody	C
GO:0030500	23	0.978	1	0.323	1	0.942	1	0.48	1	0.962	1	0.438	1	0.788	1	0.117	1	regulation of bone mineralization	P
[truncated: 1,093 more rows]
