# Supplementary material for: Alu and B1 Repeats Have Been Selectively Retained in the Upstream and Intronic Regions of Genes of Specific Functional Classes
Source: PLoS Comput Biol. 2009 Dec 18;5(12):e1000610. doi: 10.1371/journal.pcbi.1000610 (PMC2784220; doi:10.1371/journal.pcbi.1000610)
Supplement: Table S3 — GO term p-values and q-values for all human Alu families in intronic regions. (1.07 MB XLS) [file pcbi.1000610.s003.xls]

## Sheet: human Alu introns
		Alu+		Alu-		AluJ+		AluJ-		AluS+		AluS-		AluY+		AluY-
GO term id	genes	p-value	q-value	p-value	q-value	p-value	q-value	p-value	q-value	p-value	q-value	p-value	q-value	p-value	q-value	p-value	q-value	GO term description	GO term catecory
GO:0000003	491	0.997	1	0.979	1	0.779	1	0.659	1	0.997	1	0.954	1	0.99	1	0.998	1	reproduction	P
GO:0000018	11	0.482	1	0.0922	1	0.465	1	0.263	1	0.364	1	0.0824	1	0.873	1	0.422	1	regulation of DNA recombination	P
GO:0000030	14	0.256	1	0.0528	1	0.835	1	0.335	1	0.141	1	0.0416	1	0.258	1	0.461	1	mannosyltransferase activity	F
GO:0000041	74	0.708	1	0.367	1	0.568	1	0.447	1	0.685	1	0.206	1	0.818	1	0.955	1	transition metal ion transport	P
GO:0000045	11	0.282	1	0.211	1	0.579	1	0.87	1	0.243	1	0.0899	1	0.326	1	0.549	1	autophagic vacuole formation	P
GO:0000049	21	0.177	1	0.0127	0.384	0.223	1	0.0417	1	0.24	1	0.0556	1	0.421	1	0.0452	0.81	tRNA binding	F
GO:0000051	22	0.741	1	0.97	1	0.57	1	0.943	1	0.552	1	0.946	1	1	1	0.84	1	urea cycle intermediate metabolism	P
GO:0000059	17	0.0416	1	0.0134	0.384	0.0308	0.565	0.0341	0.542	0.0743	1	0.00945	0.143	0.163	1	0.285	1	protein import into nucleus, docking	P
GO:0000060	24	0.411	1	0.655	1	0.65	1	0.204	1	0.236	1	0.559	1	0.949	1	1	1	protein import into nucleus, translocation	P
GO:0000062	12	0.000757	0.016	0.00661	0.15	0.0653	1	0.119	1	8.78e-05	0.002	0.00197	0.051	0.738	1	0.938	1	acyl-CoA binding	F
GO:0000070	31	0.397	1	0.159	1	0.443	1	0.298	1	0.657	1	0.327	1	0.11	1	0.139	1	mitotic sister chromatid segregation	P
GO:0000074	363	0.233	1	0.345	1	0.00186	0.018	0.0196	0.41	0.473	1	0.744	1	0.962	1	0.493	1	regulation of progression through cell cycle	P
GO:0000075	68	0.0231	1	0.000656	0.019	0.00116	0.0125	0.00291	0.056	0.11	1	0.00152	0.03	0.232	1	0.114	1	cell cycle checkpoint	P
GO:0000077	33	0.068	1	0.0197	0.924	0.0162	0.192	0.0196	0.41	0.105	1	0.0465	1	0.404	1	0.271	1	DNA damage checkpoint	P
GO:0000079	47	0.276	1	0.128	1	0.175	1	0.0144	0.281	0.292	1	0.465	1	0.956	1	0.332	1	regulation of cyclin-dependent protein kinase activity	P
GO:0000080	16	0.155	1	0.135	1	0.0308	0.565	0.0619	1	0.249	1	0.255	1	0.391	1	0.279	1	G1 phase of mitotic cell cycle	P
GO:0000082	45	0.259	1	0.544	1	0.134	1	0.0868	1	0.207	1	0.893	1	0.926	1	0.532	1	G1/S transition of mitotic cell cycle	P
GO:0000084	15	0.373	1	0.32	1	0.503	1	0.58	1	0.511	1	0.307	1	0.158	1	0.213	1	S phase of mitotic cell cycle	P
GO:0000086	20	0.0693	1	0.0378	1	0.0348	0.587	0.0125	0.157	0.125	1	0.0919	1	0.172	1	0.234	1	G2/M transition of mitotic cell cycle	P
GO:0000087	226	0.00646	0.137	5.38e-07	0.001	0.000715	0.0125	5.71e-06	0.000832	0.0704	1	1.97e-05	0.00229	0.43	1	0.00624	0.066	M phase of mitotic cell cycle	P
GO:0000096	20	0.383	1	0.405	1	0.187	1	0.142	1	0.521	1	0.455	1	0.682	1	0.797	1	sulfur amino acid metabolism	P
GO:0000097	13	0.729	1	0.667	1	0.209	1	0.239	1	0.929	1	0.72	1	0.791	1	0.998	1	sulfur amino acid biosynthesis	P
GO:0000118	27	0.186	1	0.0709	1	0.148	1	0.313	1	0.265	1	0.0946	1	0.432	1	0.166	1	histone deacetylase complex	C
GO:0000119	25	0.135	1	0.0308	1	0.266	1	0.212	1	0.145	1	0.016	0.565	0.624	1	0.119	1	mediator complex	C
GO:0000122	190	0.997	1	0.981	1	0.866	1	0.784	1	0.991	1	0.991	1	1	1	0.866	1	negative regulation of transcription from RNA polymerase II promoter	P
GO:0000123	12	0.262	1	0.414	1	0.0966	1	0.136	1	0.355	1	0.661	1	0.474	1	0.385	1	histone acetyltransferase complex	C
GO:0000139	348	0.477	1	0.293	1	0.000776	0.0125	0.0203	0.41	0.74	1	0.426	1	0.997	1	0.961	1	Golgi membrane	C
GO:0000146	15	0.612	1	0.932	1	0.484	1	0.889	1	0.686	1	0.886	1	0.477	1	0.977	1	microfilament motor activity	F
GO:0000149	29	0.978	1	0.781	1	0.363	1	0.15	1	0.975	1	0.995	1	1	1	1	1	SNARE binding	F
GO:0000151	96	0.15	1	0.129	1	0.0108	0.157	0.0018	0.027	0.502	1	0.357	1	0.29	1	0.81	1	ubiquitin ligase complex	C
GO:0000152	16	0.107	1	0.0362	1	0.0547	1	0.03	0.542	0.106	1	0.0536	1	0.882	1	0.555	1	nuclear ubiquitin ligase complex	C
GO:0000155	13	0.713	1	0.992	1	0.506	1	0.949	1	0.773	1	0.955	1	0.562	1	0.966	1	two-component sensor activity	F
GO:0000159	23	0.551	1	0.51	1	0.373	1	0.212	1	0.695	1	0.491	1	0.414	1	0.819	1	protein phosphatase type 2A complex	C
GO:0000160	11	0.723	1	1	1	0.836	1	0.988	1	0.799	1	1	1	0.607	1	0.755	1	two-component signal transduction system (phosphorelay)	P
GO:0000165	187	0.988	1	0.999	1	0.935	1	0.568	1	0.972	1	0.999	1	0.98	1	0.999	1	MAPKKK cascade	P
GO:0000166	2323	0.00532	0.137	4.95e-06	0.00141	6.07e-11	0	7.84e-08	0	0.228	1	0.000596	0.0102	0.955	1	0.73	1	nucleotide binding	F
GO:0000178	11	0.221	1	0.294	1	0.137	1	0.188	1	0.142	1	0.224	1	0.998	1	0.994	1	exosome (RNase complex)	C
GO:0000184	21	0.00156	0.049	3.15e-05	0.003	0.000317	0.00718	1.57e-05	0.002	0.044	1	0.000153	0.00229	0.00719	0.207	0.309	1	mRNA catabolism, nonsense-mediated decay	P
GO:0000186	16	0.986	1	1	1	0.997	1	0.741	1	0.97	1	1	1	0.96	1	1	1	activation of MAPKK activity	P
GO:0000187	69	0.827	1	0.811	1	0.977	1	0.487	1	0.659	1	0.793	1	0.74	1	0.977	1	activation of MAPK activity	P
GO:0000188	20	0.998	1	0.996	1	0.784	1	0.995	1	0.994	1	0.957	1	1	1	1	1	inactivation of MAPK activity	P
GO:0000209	15	0.329	1	0.0301	1	0.164	1	0.0134	0.281	0.387	1	0.0433	1	0.423	1	0.142	1	protein polyubiquitination	P
GO:0000226	106	0.177	1	0.0907	1	0.0406	0.587	0.0621	1	0.273	1	0.0903	1	0.52	1	0.693	1	microtubule cytoskeleton organization and biogenesis	P
GO:0000228	110	0.0656	1	0.00285	0.051	0.0322	0.587	0.0209	0.41	0.0873	1	0.00786	0.105	0.72	1	0.0766	1	nuclear chromosome	C
GO:0000242	12	0.0119	0.272	0.0307	1	0.0133	0.192	0.0381	1	0.066	1	0.122	1	0.254	1	0.115	1	pericentriolar material	C
GO:0000245	36	0.0398	1	0.0122	0.384	0.0152	0.192	0.0144	0.281	0.173	1	0.0302	1	0.206	1	0.248	1	spliceosome assembly	P
GO:0000267	855	1	1	0.984	1	0.768	1	0.132	1	1	1	0.989	1	1	1	1	1	cell fraction	C
GO:0000271	47	0.467	1	0.808	1	0.0889	1	0.433	1	0.6	1	0.741	1	0.987	1	1	1	polysaccharide biosynthesis	P
GO:0000272	16	0.949	1	0.971	1	0.463	1	0.618	1	0.984	1	0.992	1	0.98	1	0.848	1	polysaccharide catabolism	P
GO:0000278	387	0.00692	0.137	2.68e-06	0.00141	0.000411	0.0125	3.67e-07	0	0.0295	0.655	0.000206	0.0029	0.799	1	0.0436	0.81	mitotic cell cycle	P
GO:0000279	299	0.00422	0.137	1.19e-08	0.001	0.00152	0.016	2.45e-06	0	0.035	0.655	1.34e-06	0.00167	0.345	1	0.000743	0.0095	M phase	P
GO:0000287	416	0.276	1	0.106	1	0.000711	0.0125	0.00428	0.0684	0.641	1	0.391	1	0.991	1	0.526	1	magnesium ion binding	F
GO:0000299	12	0.645	1	0.204	1	0.271	1	0.0425	1	0.634	1	0.288	1	1	1	0.623	1	integral to membrane of membrane fraction	C
GO:0000302	36	0.54	1	0.624	1	0.432	1	0.834	1	0.641	1	0.471	1	0.355	1	0.822	1	response to reactive oxygen species	P
GO:0000313	50	0.109	1	0.279	1	0.973	1	0.114	1	0.0191	0.381	0.439	1	0.75	1	0.729	1	organellar ribosome	C
GO:0000314	20	0.0225	1	0.577	1	0.996	1	0.384	1	0.0087	0.202	0.764	1	0.18	1	0.34	1	organellar small ribosomal subunit	C
GO:0000315	17	0.838	1	0.691	1	0.997	1	0.345	1	0.376	1	0.668	1	1	1	0.886	1	organellar large ribosomal subunit	C
GO:0000323	213	0.22	1	0.0804	1	0.0454	0.868	0.00939	0.112	0.308	1	0.128	1	0.737	1	0.755	1	lytic vacuole	C
GO:0000375	158	1.58e-05	0.005	7.3e-07	0.001	0.000312	0.00718	0.000378	0.00717	0.0019	0.043	1.53e-05	0.00229	0.0257	0.256	0.00893	0.066	RNA splicing, via transesterification reactions	P
GO:0000377	158	1.58e-05	0.005	7.3e-07	0.001	0.000312	0.00718	0.000378	0.00717	0.0019	0.043	1.53e-05	0.00229	0.0257	0.256	0.00893	0.066	RNA splicing, via transesterification reactions with bulged adenosine as nucleophile	P
GO:0000387	28	0.000107	0.005	0.00043	0.019	0.0191	0.236	0.000788	0.0103	0.0124	0.301	0.00396	0.074	0.017	0.207	0.185	1	spliceosomal snRNP biogenesis	P
GO:0000398	158	1.58e-05	0.005	7.3e-07	0.001	0.000312	0.00718	0.000378	0.00717	0.0019	0.043	1.53e-05	0.00229	0.0257	0.256	0.00893	0.066	nuclear mRNA splicing, via spliceosome	P
GO:0000502	51	0.0944	1	0.28	1	0.289	1	0.0148	0.281	0.083	1	0.463	1	0.394	1	0.758	1	proteasome complex (sensu Eukaryota)	C
GO:0000718	23	0.0481	1	0.105	1	0.17	1	0.103	1	0.0425	1	0.113	1	0.324	1	0.525	1	nucleotide-excision repair, DNA damage removal	P
GO:0000723	28	0.257	1	0.0908	1	0.201	1	0.0974	1	0.218	1	0.305	1	0.783	1	0.0758	1	telomere maintenance	P
GO:0000724	15	0.465	1	0.0754	1	0.339	1	0.059	1	0.479	1	0.115	1	0.696	1	0.0659	1	double-strand break repair via homologous recombination	P
GO:0000725	15	0.465	1	0.0754	1	0.339	1	0.059	1	0.479	1	0.115	1	0.696	1	0.0659	1	recombinational repair	P
GO:0000726	12	0.546	1	0.0359	1	0.467	1	0.0396	1	0.569	1	0.0516	1	0.626	1	0.146	1	non-recombinational repair	P
GO:0000775	83	0.00616	0.137	1.46e-05	0.00221	0.00246	0.018	8.76e-05	0.00391	0.0337	0.655	3.84e-05	0.00229	0.283	1	0.0179	0.177	chromosome, pericentric region	C
GO:0000776	46	0.0142	0.272	3.53e-05	0.003	1.53e-05	0.000971	1.7e-05	0.002	0.0755	1	0.000166	0.00229	0.829	1	0.0132	0.138	kinetochore	C
GO:0000777	29	0.0549	1	0.00269	0.051	5.3e-05	0.00457	0.00121	0.013	0.23	1	0.00697	0.105	0.9	1	0.0346	0.455	condensed chromosome kinetochore	C
GO:0000779	34	0.114	1	0.00269	0.051	0.000449	0.0125	0.00202	0.027	0.419	1	0.00727	0.105	0.819	1	0.0514	0.81	condensed chromosome, pericentric region	C
GO:0000781	24	0.343	1	0.0954	1	0.375	1	0.159	1	0.261	1	0.139	1	0.636	1	0.252	1	chromosome, telomeric region	C
GO:0000785	229	0.291	1	0.2	1	0.399	1	0.304	1	0.173	1	0.16	1	0.996	1	0.834	1	chromatin	C
GO:0000786	89	0.417	1	0.677	1	0.653	1	0.64	1	0.287	1	0.53	1	0.971	1	0.991	1	nucleosome	C
GO:0000790	33	0.159	1	0.0208	0.924	0.14	1	0.131	1	0.133	1	0.0237	0.769	0.943	1	0.0569	1	nuclear chromatin	C
GO:0000792	37	0.7	1	0.124	1	0.311	1	0.223	1	0.635	1	0.165	1	1	1	0.0666	1	heterochromatin	C
GO:0000793	83	0.01	0.177	1.06e-05	0.00141	5.32e-05	0.00457	0.000557	0.00717	0.0915	1	6.77e-05	0.00229	0.279	1	0.0114	0.138	condensed chromosome	C
GO:0000794	39	0.141	1	0.00226	0.051	0.245	1	0.069	1	0.253	1	0.0053	0.074	0.142	1	0.0836	1	condensed nuclear chromosome	C
GO:0000795	17	0.122	1	0.0158	0.384	0.396	1	0.141	1	0.105	1	0.016	0.565	0.198	1	0.247	1	synaptonemal complex	C
GO:0000803	13	0.727	1	0.546	1	0.335	1	0.664	1	0.78	1	0.635	1	0.983	1	0.262	1	sex chromosome	C
GO:0000819	32	0.262	1	0.121	1	0.331	1	0.245	1	0.469	1	0.256	1	0.101	1	0.138	1	sister chromatid segregation	P
GO:0000902	590	1	1	1	1	0.992	1	0.931	1	1	1	1	1	1	1	1	1	cell morphogenesis	P
GO:0000904	194	1	1	1	1	1	1	0.999	1	1	1	1	1	1	1	1	1	cellular morphogenesis during differentiation	P
GO:0000910	34	0.279	1	0.245	1	0.162	1	0.587	1	0.437	1	0.214	1	0.172	1	0.473	1	cytokinesis	P
GO:0000922	24	0.165	1	0.000274	0.00826	0.0374	0.587	0.0119	0.127	0.23	1	0.000497	0.0102	0.972	1	0.00461	0.066	spindle pole	C
GO:0000930	10	0.0316	1	0.0114	0.384	0.0187	0.236	0.0684	1	0.0368	1	0.0235	0.769	0.509	1	0.055	1	gamma-tubulin complex	C
GO:0001501	312	1	1	1	1	1	1	1	1	1	1	1	1	1	1	1	1	skeletal development	P
GO:0001502	16	1	1	0.999	1	0.981	1	0.999	1	1	1	0.96	1	1	1	1	1	cartilage condensation	P
GO:0001503	141	1	1	0.998	1	0.98	1	0.961	1	0.998	1	0.985	1	1	1	0.994	1	ossification	P
GO:0001505	102	1	1	1	1	0.842	1	0.599	1	1	1	1	1	1	1	1	1	regulation of neurotransmitter levels	P
GO:0001508	47	0.67	1	0.953	1	0.151	1	0.669	1	0.875	1	0.906	1	0.956	1	0.976	1	regulation of action potential	P
GO:0001518	14	1	1	1	1	0.667	1	1	1	0.999	1	1	1	1	1	1	1	voltage-gated sodium channel complex	C
GO:0001522	14	0.0435	1	0.156	1	0.028	0.497	0.115	1	0.109	1	0.68	1	0.295	1	0.131	1	pseudouridine synthesis	P
GO:0001523	13	0.814	1	0.986	1	0.736	1	0.996	1	0.768	1	0.957	1	0.974	1	0.919	1	retinoid metabolism	P
GO:0001525	156	1	1	1	1	0.722	1	1	1	1	1	1	1	0.999	1	1	1	angiogenesis	P
GO:0001533	19	0.998	1	1	1	0.806	1	1	1	1	1	1	1	1	1	1	1	cornified envelope	C
GO:0001539	43	0.818	1	0.961	1	0.56	1	0.831	1	0.67	1	0.909	1	1	1	1	1	ciliary or flagellar motility	P
GO:0001540	11	0.993	1	0.998	1	0.255	1	1	1	1	1	0.997	1	1	1	1	1	beta-amyloid binding	F
GO:0001541	22	0.292	1	0.823	1	0.256	1	0.668	1	0.852	1	0.801	1	0.0862	1	0.795	1	ovarian follicle development	P
GO:0001558	163	0.997	1	1	1	0.663	1	0.879	1	0.999	1	1	1	0.983	1	1	1	regulation of cell growth	P
GO:0001565	15	0.1	1	0.202	1	0.088	1	0.194	1	0.105	1	0.2	1	0.516	1	0.398	1	phorbol ester receptor activity	F
GO:0001568	221	1	1	1	1	0.659	1	1	1	1	1	1	1	1	1	1	1	blood vessel development	P
GO:0001569	15	1	1	1	1	1	1	0.999	1	1	1	1	1	0.937	1	1	1	patterning of blood vessels	P
GO:0001570	24	0.876	1	0.941	1	0.471	1	0.933	1	0.956	1	0.918	1	0.737	1	0.944	1	vasculogenesis	P
GO:0001584	654	1	1	1	1	1	1	0.999	1	1	1	1	1	1	1	1	1	rhodopsin-like receptor activity	F
GO:0001595	61	0.99	1	0.992	1	0.986	1	0.56	1	0.95	1	0.976	1	0.975	1	1	1	angiotensin receptor activity	F
GO:0001603	18	0.921	1	0.634	1	0.609	1	0.73	1	0.874	1	0.485	1	1	1	0.866	1	vasopressin-like receptor activity	F
GO:0001608	100	1	1	1	1	1	1	0.544	1	0.998	1	1	1	1	1	1	1	nucleotide receptor activity, G-protein coupled	F
GO:0001614	107	1	1	1	1	1	1	0.569	1	0.991	1	1	1	1	1	1	1	purinergic nucleotide receptor activity	F
GO:0001619	20	0.979	1	0.746	1	0.999	1	0.195	1	0.827	1	0.975	1	1	1	0.645	1	lysosphingolipid and lysophosphatidic acid receptor activity	F
GO:0001633	36	0.967	1	1	1	0.846	1	1	1	0.951	1	0.998	1	0.955	1	1	1	secretin-like receptor activity	F
GO:0001637	56	1	1	0.999	1	0.997	1	0.711	1	0.994	1	0.997	1	0.998	1	1	1	G-protein chemoattractant receptor activity	F
GO:0001649	45	1	1	1	1	0.999	1	0.755	1	1	1	1	1	0.985	1	0.999	1	osteoblast differentiation	P
GO:0001653	261	1	1	1	1	1	1	0.87	1	1	1	1	1	1	1	1	1	peptide receptor activity	F
GO:0001654	72	0.967	1	0.975	1	0.467	1	0.995	1	0.977	1	0.962	1	0.932	1	0.812	1	eye development	P
GO:0001655	78	1	1	1	1	0.997	1	1	1	1	1	1	1	1	1	0.994	1	urogenital system development	P
GO:0001656	38	1	1	1	1	1	1	1	1	1	1	1	1	1	1	1	1	metanephros development	P
GO:0001657	30	1	1	1	1	1	1	1	1	1	1	1	1	1	1	1	1	ureteric bud development	P
GO:0001658	20	1	1	1	1	1	1	1	1	1	1	1	1	1	1	1	1	ureteric bud branching	P
GO:0001659	204	0.999	1	0.998	1	0.423	1	0.993	1	1	1	0.99	1	0.981	1	1	1	thermoregulation	P
GO:0001662	10	0.901	1	0.987	1	0.997	1	0.915	1	0.841	1	0.996	1	0.635	1	0.945	1	behavioral fear response	P
GO:0001664	88	1	1	1	1	0.993	1	0.963	1	1	1	1	1	1	1	1	1	G-protein-coupled receptor binding	F
GO:0001666	72	0.436	1	0.928	1	0.0609	1	0.851	1	0.499	1	0.903	1	1	1	0.894	1	response to hypoxia	P
GO:0001669	31	0.756	1	0.843	1	0.978	1	0.84	1	0.718	1	0.853	1	0.276	1	0.615	1	acrosome	C
GO:0001701	109	0.746	1	0.375	1	0.848	1	0.151	1	0.687	1	0.797	1	0.731	1	0.0693	1	embryonic development (sensu Mammalia)	P
GO:0001702	14	0.478	1	0.431	1	0.246	1	0.0747	1	0.447	1	0.533	1	0.978	1	0.951	1	gastrulation (sensu Deuterostomia)	P
GO:0001704	37	0.989	1	0.978	1	0.992	1	0.469	1	0.954	1	0.981	1	1	1	1	1	formation of primary germ layer	P
GO:0001707	33	0.948	1	0.973	1	0.965	1	0.34	1	0.853	1	0.997	1	1	1	1	1	mesoderm formation	P
GO:0001708	26	1	1	1	1	0.986	1	1	1	1	1	1	1	1	1	1	1	cell fate specification	P
GO:0001709	35	1	1	1	1	1	1	1	1	1	1	1	1	1	1	1	1	cell fate determination	P
GO:0001725	18	0.812	1	0.452	1	0.632	1	0.316	1	0.935	1	0.339	1	0.486	1	0.884	1	stress fiber	C
GO:0001726	46	0.535	1	0.593	1	0.109	1	0.305	1	0.556	1	0.521	1	0.997	1	0.966	1	ruffle	C
GO:0001727	25	0.134	1	0.29	1	0.0711	1	0.343	1	0.179	1	0.23	1	0.479	1	0.927	1	lipid kinase activity	F
GO:0001739	13	0.727	1	0.546	1	0.335	1	0.664	1	0.78	1	0.635	1	0.983	1	0.262	1	sex chromatin	C
GO:0001750	13	0.995	1	0.993	1	1	1	0.998	1	0.894	1	0.989	1	1	1	0.914	1	photoreceptor outer segment	C
GO:0001755	19	0.999	1	0.999	1	0.925	1	0.973	1	1	1	0.995	1	0.589	1	1	1	neural crest cell migration	P
GO:0001756	27	1	1	0.999	1	0.996	1	0.921	1	1	1	1	1	0.972	1	0.956	1	somitogenesis	P
GO:0001759	13	1	1	1	1	0.948	1	1	1	0.999	1	1	1	1	1	0.952	1	induction of an organ	P
GO:0001763	59	1	1	1	1	1	1	1	1	1	1	1	1	1	1	1	1	morphogenesis of a branching structure	P
GO:0001764	55	1	1	1	1	1	1	0.807	1	1	1	1	1	1	1	0.999	1	neuron migration	P
GO:0001772	24	0.197	1	0.997	1	0.0121	0.192	0.698	1	0.66	1	1	1	0.847	1	0.887	1	immunological synapse	C
GO:0001775	289	0.828	1	0.999	1	0.382	1	0.997	1	0.782	1	0.983	1	0.999	1	1	1	cell activation	P
GO:0001776	30	0.559	1	0.355	1	0.303	1	0.195	1	0.708	1	0.394	1	0.745	1	0.66	1	leukocyte homeostasis	P
GO:0001782	10	0.331	1	0.431	1	0.0662	1	0.277	1	0.653	1	0.508	1	0.99	1	0.364	1	B cell homeostasis	P
GO:0001816	133	0.762	1	0.994	1	0.434	1	0.968	1	0.74	1	0.976	1	0.996	1	0.999	1	cytokine production	P
GO:0001817	18	0.906	1	0.977	1	0.725	1	0.895	1	0.955	1	0.987	1	0.677	1	0.667	1	regulation of cytokine production	P
GO:0001819	12	0.492	1	0.725	1	0.499	1	0.619	1	0.739	1	0.808	1	0.294	1	0.285	1	positive regulation of cytokine production	P
GO:0001822	68	1	1	1	1	0.989	1	1	1	1	1	1	1	1	1	0.982	1	kidney development	P
GO:0001824	30	0.0804	1	0.0202	0.924	0.403	1	0.159	1	0.0599	1	0.0396	1	0.271	1	0.0481	0.81	blastocyst development	P
GO:0001825	10	0.112	1	0.181	1	0.225	1	0.585	1	0.132	1	0.146	1	0.198	1	0.304	1	blastocyst formation	P
GO:0001832	10	0.291	1	0.079	1	0.297	1	0.772	1	0.242	1	0.0482	1	0.701	1	0.182	1	blastocyst growth	P
GO:0001836	15	0.306	1	0.0863	1	0.303	1	0.236	1	0.389	1	0.111	1	0.191	1	0.333	1	release of cytochrome c from mitochondria	P
GO:0001837	13	0.927	1	0.99	1	0.89	1	0.531	1	0.848	1	0.973	1	1	1	1	1	epithelial to mesenchymal transition	P
GO:0001838	40	0.828	1	0.853	1	0.669	1	0.571	1	0.742	1	0.923	1	0.958	1	0.669	1	embryonic epithelial tube formation	P
GO:0001839	39	0.783	1	0.785	1	0.59	1	0.515	1	0.701	1	0.865	1	0.954	1	0.627	1	neural plate morphogenesis	P
GO:0001841	37	0.691	1	0.717	1	0.552	1	0.408	1	0.589	1	0.838	1	0.933	1	0.523	1	neural tube formation	P
GO:0001843	27	0.824	1	0.684	1	0.562	1	0.415	1	0.764	1	0.808	1	0.952	1	0.585	1	neural tube closure	P
GO:0001871	128	0.985	1	1	1	0.913	1	1	1	0.917	1	1	1	0.999	1	0.981	1	pattern binding	F
GO:0001889	26	0.479	1	0.47	1	0.27	1	0.375	1	0.545	1	0.612	1	0.712	1	0.249	1	liver development	P
GO:0001890	31	0.84	1	0.731	1	0.212	1	0.703	1	0.954	1	0.76	1	0.533	1	0.493	1	placenta development	P
GO:0001892	11	0.279	1	0.229	1	0.141	1	0.342	1	0.287	1	0.19	1	0.626	1	0.447	1	embryonic placenta development	P
GO:0001894	40	0.641	1	0.376	1	0.441	1	0.187	1	0.711	1	0.342	1	0.815	1	0.901	1	tissue homeostasis	P
GO:0001906	25	0.678	1	0.986	1	0.741	1	1	1	0.531	1	0.971	1	0.794	1	0.743	1	cell killing	P
GO:0001909	22	0.564	1	0.963	1	0.728	1	0.998	1	0.358	1	0.923	1	0.933	1	0.857	1	leukocyte mediated cytotoxicity	P
GO:0001910	12	0.411	1	0.929	1	0.891	1	0.94	1	0.278	1	0.873	1	0.707	1	0.932	1	regulation of leukocyte mediated cytotoxicity	P
GO:0001932	90	0.998	1	1	1	0.849	1	1	1	0.994	1	0.999	1	1	1	1	1	regulation of protein amino acid phosphorylation	P
GO:0001933	12	0.368	1	0.406	1	0.143	1	0.337	1	0.394	1	0.503	1	0.85	1	0.368	1	negative regulation of protein amino acid phosphorylation	P
GO:0001934	44	0.994	1	1	1	0.735	1	1	1	0.992	1	0.988	1	1	1	1	1	positive regulation of protein amino acid phosphorylation	P
GO:0001935	29	1	1	0.491	1	0.639	1	0.862	1	1	1	0.71	1	0.997	1	0.175	1	endothelial cell proliferation	P
GO:0001936	24	0.999	1	0.69	1	0.601	1	0.961	1	0.999	1	0.844	1	0.997	1	0.239	1	regulation of endothelial cell proliferation	P
GO:0001937	15	0.999	1	0.844	1	0.39	1	0.992	1	1	1	0.749	1	1	1	1	1	negative regulation of endothelial cell proliferation	P
GO:0001938	10	0.959	1	0.431	1	0.988	1	0.771	1	0.852	1	0.916	1	0.861	1	0.135	1	positive regulation of endothelial cell proliferation	P
GO:0001942	31	1	1	1	1	0.909	1	0.999	1	1	1	1	1	1	1	0.782	1	hair follicle development	P
GO:0001944	225	1	1	1	1	0.702	1	1	1	1	1	1	1	1	1	1	1	vasculature development	P
GO:0001947	14	0.821	1	0.989	1	0.699	1	0.996	1	0.784	1	0.951	1	0.867	1	0.651	1	heart looping	P
GO:0001948	14	0.446	1	0.401	1	0.468	1	0.285	1	0.485	1	0.464	1	0.381	1	0.675	1	glycoprotein binding	F
GO:0001952	18	1	1	1	1	0.937	1	0.6	1	1	1	1	1	1	1	0.981	1	regulation of cell-matrix adhesion	P
GO:0001974	12	1	1	1	1	0.904	1	0.959	1	1	1	1	1	1	1	1	1	blood vessel remodeling	P
GO:0001976	17	0.994	1	1	1	0.638	1	0.985	1	0.998	1	0.998	1	1	1	1	1	fast regulation of arterial pressure	P
GO:0001990	14	0.998	1	1	1	0.795	1	0.912	1	0.992	1	0.997	1	1	1	1	1	regulation of blood pressure by hormones	P
GO:0002009	116	1	1	1	1	0.995	1	0.993	1	1	1	1	1	1	1	0.996	1	morphogenesis of an epithelium	P
GO:0002026	10	0.99	1	0.976	1	0.446	1	0.912	1	0.963	1	0.965	1	0.99	1	1	1	cardiac inotropy	P
GO:0002053	10	0.87	1	0.988	1	0.798	1	0.777	1	0.779	1	0.973	1	0.992	1	1	1	positive regulation of mesenchymal cell proliferation	P
GO:0002062	19	1	1	1	1	1	1	1	1	1	1	1	1	1	1	1	1	chondrocyte differentiation	P
GO:0002064	11	1	1	0.994	1	1	1	0.774	1	0.999	1	1	1	1	1	0.696	1	epithelial cell development	P
GO:0002088	11	0.773	1	0.641	1	0.299	1	0.973	1	0.909	1	0.74	1	0.925	1	0.375	1	lens development (sensu Vertebrata)	P
GO:0002200	29	0.32	1	0.348	1	0.481	1	0.481	1	0.18	1	0.282	1	0.854	1	0.674	1	somatic diversification of immune receptors	P
GO:0002204	24	0.411	1	0.286	1	0.671	1	0.521	1	0.227	1	0.225	1	0.919	1	0.519	1	somatic recombination of immunoglobulin genes during immune response	P
GO:0002208	24	0.411	1	0.286	1	0.671	1	0.521	1	0.227	1	0.225	1	0.919	1	0.519	1	somatic diversification of immunoglobulins during immune response	P
GO:0002209	10	0.901	1	0.987	1	0.997	1	0.915	1	0.841	1	0.996	1	0.635	1	0.945	1	behavioral defense response	P
GO:0002217	582	1	1	1	1	1	1	1	1	1	1	1	1	1	1	1	1	physiological defense response	P
GO:0002228	18	0.597	1	0.971	1	0.693	1	0.998	1	0.413	1	0.952	1	0.902	1	0.759	1	natural killer cell mediated immunity	P
GO:0002245	546	1	1	1	1	0.999	1	1	1	1	1	1	1	1	1	1	1	physiological response to wounding	P
GO:0002250	147	0.927	1	0.999	1	0.556	1	0.996	1	0.877	1	0.99	1	1	1	1	1	adaptive immune response	P
GO:0002252	189	0.951	1	1	1	0.876	1	0.999	1	0.806	1	1	1	1	1	1	1	immune effector process	P
GO:0002253	83	0.99	1	0.995	1	0.591	1	0.999	1	0.987	1	0.957	1	1	1	1	1	activation of immune response	P
GO:0002260	22	0.152	1	0.125	1	0.0956	1	0.159	1	0.25	1	0.102	1	0.654	1	0.814	1	lymphocyte homeostasis	P
GO:0002263	17	0.276	1	0.402	1	0.246	1	0.56	1	0.17	1	0.266	1	0.984	1	0.88	1	cell activation during immune response	P
GO:0002274	36	0.231	1	0.413	1	0.188	1	0.809	1	0.224	1	0.222	1	0.836	1	0.829	1	myeloid leukocyte activation	P
GO:0002285	15	0.464	1	0.677	1	0.314	1	0.794	1	0.376	1	0.524	1	0.972	1	0.923	1	lymphocyte activation during immune response	P
GO:0002286	13	0.345	1	0.614	1	0.236	1	0.779	1	0.28	1	0.428	1	0.935	1	0.948	1	T cell activation during immune response	P
GO:0002292	13	0.345	1	0.614	1	0.236	1	0.779	1	0.28	1	0.428	1	0.935	1	0.948	1	T cell differentiation during immune response	P
GO:0002293	13	0.345	1	0.614	1	0.236	1	0.779	1	0.28	1	0.428	1	0.935	1	0.948	1	alpha-beta T cell differentiation during immune response	P
GO:0002294	13	0.345	1	0.614	1	0.236	1	0.779	1	0.28	1	0.428	1	0.935	1	0.948	1	CD4-positive, alpha-beta T cell differentiation during immune response	P
GO:0002366	17	0.276	1	0.402	1	0.246	1	0.56	1	0.17	1	0.266	1	0.984	1	0.88	1	leukocyte activation during immune response	P
GO:0002367	16	1	1	1	1	1	1	1	1	1	1	1	1	0.991	1	0.921	1	cytokine production during immune response	P
GO:0002376	1064	1	1	1	1	1	1	1	1	1	1	1	1	1	1	1	1	immune system process	P
GO:0002377	41	0.504	1	0.602	1	0.812	1	0.646	1	0.276	1	0.475	1	0.933	1	0.895	1	immunoglobulin production	P
GO:0002381	25	0.448	1	0.297	1	0.698	1	0.485	1	0.261	1	0.242	1	0.917	1	0.532	1	immunoglobulin production during immune response	P
GO:0002429	38	0.342	1	0.662	1	0.0379	0.587	0.84	1	0.452	1	0.508	1	1	1	0.927	1	immune response-activating cell surface receptor signaling pathway	P
GO:0002437	54	0.997	1	1	1	0.614	1	0.966	1	0.999	1	1	1	0.99	1	0.998	1	inflammatory response to antigenic stimulus	P
GO:0002438	48	0.991	1	0.998	1	0.834	1	0.899	1	0.996	1	0.999	1	0.953	1	0.993	1	acute inflammatory response to antigenic stimulus	P
GO:0002440	50	0.368	1	0.86	1	0.931	1	0.902	1	0.14	1	0.747	1	0.99	1	0.939	1	production of molecular mediator of immune response	P
GO:0002443	158	0.889	1	0.996	1	0.586	1	0.984	1	0.814	1	0.99	1	0.997	1	0.994	1	leukocyte mediated immunity	P
GO:0002444	12	0.032	1	0.103	1	0.0596	1	0.192	1	0.0778	1	0.148	1	0.0981	1	0.138	1	myeloid leukocyte mediated immunity	P
GO:0002449	148	0.986	1	0.999	1	0.848	1	0.994	1	0.957	1	0.997	1	1	1	0.999	1	lymphocyte mediated immunity	P
GO:0002455	32	1	1	0.998	1	0.999	1	0.986	1	0.998	1	0.988	1	0.997	1	1	1	humoral immune response mediated by circulating immunoglobulin	P
GO:0002456	19	0.578	1	0.837	1	0.523	1	0.995	1	0.459	1	0.801	1	0.937	1	0.5	1	T cell mediated immunity	P
GO:0002460	147	0.927	1	0.999	1	0.556	1	0.996	1	0.877	1	0.99	1	1	1	1	1	adaptive immune response (sensu Gnathostomata)	P
GO:0002474	30	1	1	1	1	1	1	1	1	1	1	0.998	1	1	1	1	1	antigen processing and presentation of peptide antigen via MHC class I	P
GO:0002483	12	0.915	1	0.74	1	0.889	1	0.972	1	0.745	1	0.484	1	1	1	0.999	1	antigen processing and presentation of endogenous peptide antigen	P
GO:0002504	41	1	1	1	1	1	1	1	1	1	1	1	1	1	1	1	1	antigen processing and presentation of peptide or polysaccharide antigen via MHC class II	P
GO:0002520	266	0.785	1	0.981	1	0.33	1	0.92	1	0.848	1	0.938	1	0.94	1	0.999	1	immune system development	P
GO:0002521	139	0.89	1	0.999	1	0.322	1	0.997	1	0.947	1	0.994	1	0.991	1	1	1	leukocyte differentiation	P
GO:0002524	48	0.991	1	0.998	1	0.834	1	0.899	1	0.996	1	0.999	1	0.953	1	0.993	1	hypersensitivity	P
GO:0002526	125	1	1	1	1	0.996	1	1	1	1	1	1	1	1	1	1	1	acute inflammatory response	P
GO:0002541	42	1	1	1	1	1	1	1	1	1	1	1	1	1	1	1	1	activation of plasma proteins during acute inflammatory response	P
GO:0002562	26	0.316	1	0.208	1	0.529	1	0.498	1	0.167	1	0.151	1	0.903	1	0.496	1	somatic diversification of immune receptors via germline recombination within a single locus	P
GO:0002573	47	0.803	1	0.945	1	0.427	1	0.945	1	0.903	1	0.879	1	0.873	1	0.994	1	myeloid leukocyte differentiation	P
GO:0002682	126	0.958	1	0.996	1	0.496	1	0.998	1	0.951	1	0.976	1	1	1	1	1	regulation of immune system process	P
GO:0002683	15	0.243	1	0.779	1	0.0767	1	0.906	1	0.396	1	0.726	1	0.859	1	0.696	1	negative regulation of immune system process	P
GO:0002684	108	0.992	1	0.993	1	0.897	1	0.995	1	0.972	1	0.961	1	1	1	1	1	positive regulation of immune system process	P
GO:0002697	19	0.99	1	0.994	1	0.768	1	0.972	1	0.995	1	0.997	1	0.915	1	0.921	1	regulation of immune effector process	P
GO:0002699	16	0.971	1	0.952	1	0.969	1	0.89	1	0.958	1	0.972	1	0.743	1	0.782	1	positive regulation of immune effector process	P
GO:0002703	18	0.986	1	0.992	1	0.745	1	0.97	1	0.993	1	0.996	1	0.919	1	0.897	1	regulation of leukocyte mediated immunity	P
GO:0002705	15	0.958	1	0.94	1	0.958	1	0.881	1	0.94	1	0.966	1	0.748	1	0.733	1	positive regulation of leukocyte mediated immunity	P
GO:0002706	18	0.986	1	0.992	1	0.745	1	0.97	1	0.993	1	0.996	1	0.919	1	0.897	1	regulation of lymphocyte mediated immunity	P
GO:0002708	15	0.958	1	0.94	1	0.958	1	0.881	1	0.94	1	0.966	1	0.748	1	0.733	1	positive regulation of lymphocyte mediated immunity	P
GO:0002757	41	0.296	1	0.538	1	0.0362	0.587	0.753	1	0.365	1	0.384	1	1	1	0.928	1	immune response-activating signal transduction	P
GO:0002761	24	0.95	1	0.963	1	0.636	1	0.969	1	0.989	1	0.905	1	0.568	1	0.998	1	regulation of myeloid leukocyte differentiation	P
GO:0002762	13	0.657	1	0.764	1	0.401	1	0.73	1	0.84	1	0.616	1	0.374	1	0.96	1	negative regulation of myeloid leukocyte differentiation	P
GO:0002764	42	0.293	1	0.558	1	0.0454	0.868	0.795	1	0.328	1	0.418	1	1	1	0.856	1	immune response-regulating signal transduction	P
GO:0002768	39	0.338	1	0.682	1	0.0478	0.868	0.873	1	0.406	1	0.548	1	1	1	0.853	1	immune response-regulating cell surface receptor signaling pathway	P
GO:0002790	37	0.999	1	0.992	1	0.975	1	0.418	1	0.997	1	0.999	1	1	1	1	1	peptide secretion	P
GO:0002819	18	0.477	1	0.952	1	0.534	1	0.934	1	0.471	1	0.927	1	0.495	1	0.959	1	regulation of adaptive immune response	P
GO:0002821	13	0.359	1	0.716	1	0.694	1	0.744	1	0.344	1	0.641	1	0.245	1	0.896	1	positive regulation of adaptive immune response	P
GO:0002822	18	0.477	1	0.952	1	0.534	1	0.934	1	0.471	1	0.927	1	0.495	1	0.959	1	regulation of adaptive immune response (sensu Gnathostomata)	P
GO:0002824	13	0.359	1	0.716	1	0.694	1	0.744	1	0.344	1	0.641	1	0.245	1	0.896	1	positive regulation of adaptive immune response (sensu Gnathostomata)	P
GO:0003674	15432	1	1	0.998	1	1.16e-07	0	1.77e-05	0.002	1	1	0.999	1	1	1	1	1	molecular_function	F
GO:0003676	3506	0.757	1	3.2e-08	0.001	0.0026	0.018	3.72e-10	0	0.805	1	1.36e-05	0.00229	1	1	0.618	1	nucleic acid binding	F
GO:0003677	2490	0.975	1	0.00433	0.063	0.0702	1	0.000161	0.007	0.948	1	0.0201	0.565	1	1	0.847	1	DNA binding	F
GO:0003678	37	0.105	1	0.00483	0.115	0.0886	1	0.0341	0.542	0.361	1	0.0434	1	0.152	1	0.0906	1	DNA helicase activity	F
GO:0003682	120	0.485	1	0.00784	0.34	0.212	1	0.00708	0.081	0.489	1	0.011	0.212	0.966	1	0.454	1	chromatin binding	F
GO:0003684	52	0.000311	0.011	0.00437	0.063	0.00348	0.035	0.00159	0.018	0.00437	0.0624	0.0303	1	0.132	1	0.227	1	damaged DNA binding	F
GO:0003688	11	0.3	1	0.376	1	0.476	1	0.0692	1	0.264	1	0.7	1	0.263	1	0.833	1	DNA replication origin binding	F
GO:0003690	67	0.00989	0.177	0.0136	0.384	0.0707	1	0.171	1	0.00623	0.148	0.00882	0.143	0.77	1	0.255	1	double-stranded DNA binding	F
GO:0003697	45	0.338	1	0.0104	0.384	0.511	1	0.0766	1	0.231	1	0.0179	0.565	0.812	1	0.179	1	single-stranded DNA binding	F
GO:0003700	997	1	1	1	1	0.949	1	0.895	1	1	1	1	1	1	1	1	1	transcription factor activity	F
GO:0003702	222	0.909	1	0.132	1	0.104	1	0.174	1	0.891	1	0.0866	1	1	1	0.675	1	RNA polymerase II transcription factor activity	F
GO:0003704	38	1	1	0.988	1	0.928	1	0.937	1	1	1	0.996	1	1	1	0.782	1	specific RNA polymerase II transcription factor activity	F
GO:0003705	30	0.899	1	0.976	1	0.492	1	0.763	1	0.835	1	0.978	1	1	1	0.999	1	RNA polymerase II transcription factor activity, enhancer binding	F
GO:0003706	10	1	1	1	1	0.787	1	0.839	1	1	1	1	1	1	1	1	1	ligand-regulated transcription factor activity	F
GO:0003707	57	0.984	1	0.985	1	0.524	1	0.933	1	0.999	1	0.954	1	0.997	1	0.958	1	steroid hormone receptor activity	F
GO:0003708	35	0.998	1	1	1	0.739	1	1	1	1	1	1	1	1	1	1	1	retinoic acid receptor activity	F
GO:0003709	10	0.0629	1	0.025	1	0.0219	0.263	0.187	1	0.109	1	0.0373	1	0.785	1	0.222	1	RNA polymerase III transcription factor activity	F
GO:0003711	20	0.507	1	0.0642	1	0.35	1	0.111	1	0.397	1	0.137	1	0.99	1	0.063	1	transcriptional elongation regulator activity	F
GO:0003712	313	0.928	1	0.104	1	0.313	1	0.00193	0.027	0.954	1	0.296	1	0.998	1	0.669	1	transcription cofactor activity	F
GO:0003713	189	0.719	1	0.0518	1	0.0548	1	0.00196	0.027	0.932	1	0.255	1	0.947	1	0.301	1	transcription coactivator activity	F
GO:0003714	116	0.981	1	0.578	1	0.986	1	0.26	1	0.913	1	0.623	1	0.986	1	0.78	1	transcription corepressor activity	F
GO:0003723	710	0.00438	0.137	1.84e-10	0	6.19e-05	0.00457	2.2e-09	0	0.0456	1	1.26e-08	0.000105	0.758	1	0.0835	1	RNA binding	F
GO:0003724	31	0.79	1	0.0853	1	0.424	1	0.0605	1	0.962	1	0.0688	1	0.226	1	0.935	1	RNA helicase activity	F
GO:0003725	35	0.562	1	0.0596	1	0.264	1	0.00433	0.0684	0.498	1	0.0724	1	0.915	1	0.772	1	double-stranded RNA binding	F
GO:0003727	22	0.999	1	0.728	1	0.917	1	0.69	1	1	1	0.558	1	0.998	1	0.966	1	single-stranded RNA binding	F
GO:0003729	46	0.685	1	0.0876	1	0.635	1	0.0437	1	0.818	1	0.101	1	0.453	1	0.416	1	mRNA binding	F
GO:0003735	262	0.0988	1	0.206	1	0.993	1	0.173	1	0.0708	1	0.323	1	0.183	1	0.356	1	structural constituent of ribosome	F
GO:0003743	60	0.000965	0.016	0.000274	0.00826	0.00121	0.0125	0.000501	0.00717	0.0336	0.655	0.00284	0.064	0.13	1	0.0564	1	translation initiation factor activity	F
GO:0003746	18	0.987	1	0.651	1	1	1	0.933	1	0.784	1	0.621	1	1	1	0.346	1	translation elongation factor activity	F
GO:0003755	38	0.0932	1	0.0679	1	0.0992	1	0.0985	1	0.321	1	0.109	1	0.166	1	0.46	1	peptidyl-prolyl cis-trans isomerase activity	F
GO:0003774	161	0.11	1	0.692	1	0.00793	0.157	0.155	1	0.145	1	0.722	1	0.929	1	0.933	1	motor activity	F
GO:0003777	82	0.274	1	0.0869	1	0.0634	1	0.0181	0.41	0.312	1	0.144	1	0.816	1	0.389	1	microtubule motor activity	F
GO:0003779	318	0.46	1	0.929	1	0.00239	0.018	0.606	1	0.724	1	0.946	1	0.995	1	0.805	1	actin binding	F
GO:0003796	12	0.876	1	0.779	1	0.907	1	0.214	1	0.776	1	0.913	1	0.57	1	0.601	1	lysozyme activity	F
GO:0003823	65	1	1	1	1	1	1	1	1	1	1	1	1	1	1	1	1	antigen binding	F
GO:0003824	5647	0.00738	0.137	0.000699	0.019	1.23e-19	0	8.1e-16	0	0.505	1	0.107	1	0.988	1	0.99	1	catalytic activity	F
GO:0003840	13	0.204	1	0.769	1	0.114	1	0.738	1	0.16	1	0.959	1	0.999	1	0.128	1	gamma-glutamyltransferase activity	F
GO:0003841	11	1	1	0.997	1	0.992	1	0.996	1	0.97	1	0.992	1	1	1	0.997	1	1-acylglycerol-3-phosphate O-acyltransferase activity	F
GO:0003854	16	0.98	1	0.98	1	0.624	1	0.109	1	0.999	1	0.999	1	1	1	1	1	3-beta-hydroxy-delta5-steroid dehydrogenase activity	F
GO:0003887	30	0.603	1	0.0813	1	0.374	1	0.097	1	0.649	1	0.346	1	0.6	1	0.153	1	DNA-directed DNA polymerase activity	F
GO:0003899	51	0.0295	1	0.0041	0.063	0.0498	0.868	0.465	1	0.0827	1	0.00695	0.105	0.503	1	0.0464	0.81	DNA-directed RNA polymerase activity	F
GO:0003916	22	0.302	1	0.365	1	0.168	1	0.185	1	0.476	1	0.435	1	0.212	1	0.918	1	DNA topoisomerase activity	F
GO:0003918	17	0.297	1	0.38	1	0.289	1	0.201	1	0.42	1	0.429	1	0.165	1	0.934	1	DNA topoisomerase (ATP-hydrolyzing) activity	F
GO:0003924	258	0.45	1	0.173	1	0.00392	0.035	0.0585	1	0.936	1	0.542	1	0.971	1	0.62	1	GTPase activity	F
GO:0003950	24	0.144	1	0.221	1	0.0496	0.868	0.0214	0.41	0.278	1	0.558	1	0.553	1	0.236	1	NAD+ ADP-ribosyltransferase activity	F
GO:0003954	44	0.0298	1	0.0103	0.384	0.37	1	0.0442	1	0.0056	0.135	0.0191	0.565	0.871	1	0.162	1	NADH dehydrogenase activity	F
GO:0003993	16	0.542	1	0.154	1	0.197	1	0.00326	0.056	0.698	1	0.315	1	0.886	1	1	1	acid phosphatase activity	F
GO:0003995	16	0.131	1	0.0859	1	0.287	1	0.714	1	0.141	1	0.0509	1	0.986	1	0.346	1	acyl-CoA dehydrogenase activity	F
GO:0004003	24	0.211	1	0.0931	1	0.282	1	0.149	1	0.28	1	0.12	1	0.169	1	0.26	1	ATP-dependent DNA helicase activity	F
GO:0004004	22	0.588	1	0.139	1	0.25	1	0.0591	1	0.932	1	0.142	1	0.171	1	0.878	1	ATP-dependent RNA helicase activity	F
GO:0004012	15	0.794	1	0.654	1	0.233	1	0.873	1	0.917	1	0.485	1	0.999	1	0.925	1	phospholipid-translocating ATPase activity	F
GO:0004016	11	0.922	1	0.906	1	0.921	1	0.676	1	0.776	1	0.959	1	0.877	1	1	1	adenylate cyclase activity	F
GO:0004022	35	0.734	1	0.564	1	0.444	1	0.775	1	0.823	1	0.388	1	0.526	1	0.993	1	alcohol dehydrogenase activity	F
GO:0004033	15	0.921	1	0.412	1	0.258	1	0.149	1	0.982	1	0.549	1	0.991	1	0.498	1	aldo-keto reductase activity	F
GO:0004065	12	0.405	1	0.756	1	0.091	1	0.15	1	0.602	1	0.962	1	0.952	1	0.974	1	arylsulfatase activity	F
GO:0004089	21	0.113	1	0.514	1	0.163	1	0.873	1	0.0736	1	0.237	1	0.542	1	1	1	carbonate dehydratase activity	F
GO:0004091	23	0.003	0.049	0.198	1	0.037	0.587	0.244	1	0.0382	1	0.119	1	0.0542	1	1	1	carboxylesterase activity	F
GO:0004104	13	0.477	1	0.84	1	0.0957	1	0.636	1	0.777	1	0.85	1	0.479	1	0.739	1	cholinesterase activity	F
GO:0004112	25	0.663	1	0.982	1	0.778	1	0.998	1	0.627	1	0.923	1	0.604	1	0.961	1	cyclic-nucleotide phosphodiesterase activity	F
GO:0004114	24	0.591	1	0.998	1	0.719	1	0.995	1	0.556	1	0.996	1	0.569	1	0.938	1	3',5'-cyclic-nucleotide phosphodiesterase activity	F
GO:0004129	28	0.235	1	0.149	1	0.9	1	0.442	1	0.143	1	0.148	1	0.927	1	0.306	1	cytochrome-c oxidase activity	F
GO:0004143	15	0.958	1	0.928	1	1	1	0.655	1	0.935	1	0.907	1	0.422	1	0.999	1	diacylglycerol kinase activity	F
GO:0004175	460	0.944	1	1	1	0.316	1	0.613	1	0.963	1	1	1	0.984	1	1	1	endopeptidase activity	F
GO:0004176	20	0.778	1	0.455	1	0.798	1	0.169	1	0.617	1	0.752	1	0.863	1	0.535	1	ATP-dependent peptidase activity	F
GO:0004177	47	0.362	1	0.27	1	0.323	1	0.00693	0.081	0.294	1	0.439	1	0.92	1	0.994	1	aminopeptidase activity	F
GO:0004179	12	0.949	1	0.739	1	0.962	1	0.511	1	0.933	1	0.726	1	0.886	1	0.919	1	membrane alanyl aminopeptidase activity	F
GO:0004180	42	0.817	1	0.916	1	0.506	1	0.469	1	0.925	1	0.923	1	0.422	1	0.992	1	carboxypeptidase activity	F
GO:0004181	29	0.87	1	0.981	1	0.582	1	0.916	1	0.96	1	0.96	1	0.349	1	0.987	1	metallocarboxypeptidase activity	F
GO:0004182	24	0.866	1	0.962	1	0.57	1	0.89	1	0.972	1	0.909	1	0.251	1	0.982	1	carboxypeptidase A activity	F
GO:0004185	10	0.395	1	0.261	1	0.587	1	0.087	1	0.343	1	0.316	1	0.425	1	0.797	1	serine carboxypeptidase activity	F
GO:0004190	30	0.217	1	0.738	1	0.598	1	0.578	1	0.154	1	0.828	1	0.435	1	0.679	1	aspartic-type endopeptidase activity	F
GO:0004194	11	0.641	1	0.891	1	0.541	1	0.662	1	0.489	1	0.931	1	0.995	1	0.506	1	pepsin A activity	F
GO:0004197	89	0.367	1	0.228	1	0.0515	1	0.0245	0.41	0.637	1	0.336	1	0.537	1	0.985	1	cysteine-type endopeptidase activity	F
GO:0004198	16	0.745	1	0.769	1	0.463	1	0.0792	1	0.961	1	0.93	1	0.448	1	0.976	1	calpain activity	F
GO:0004221	64	0.156	1	0.000815	0.02	0.00929	0.157	6.76e-06	0.000832	0.295	1	0.0228	0.769	0.855	1	0.0283	0.252	ubiquitin thiolesterase activity	F
GO:0004222	105	0.99	1	1	1	0.413	1	0.915	1	0.996	1	1	1	0.991	1	0.999	1	metalloendopeptidase activity	F
GO:0004252	212	0.934	1	1	1	0.588	1	0.901	1	0.929	1	1	1	0.948	1	0.984	1	serine-type endopeptidase activity	F
GO:0004289	25	0.767	1	0.999	1	0.756	1	0.999	1	0.654	1	1	1	0.622	1	0.997	1	subtilase activity	F
GO:0004298	23	0.353	1	0.639	1	0.71	1	0.152	1	0.235	1	0.698	1	0.598	1	0.918	1	threonine endopeptidase activity	F
GO:0004303	13	0.561	1	0.649	1	0.346	1	0.405	1	0.673	1	0.672	1	0.463	1	0.825	1	estradiol 17-beta-dehydrogenase activity	F
GO:0004364	22	0.864	1	0.995	1	0.885	1	0.147	1	0.975	1	1	1	0.369	1	0.995	1	glutathione transferase activity	F
GO:0004385	10	0.818	1	0.659	1	0.423	1	0.0351	0.712	0.853	1	0.886	1	1	1	0.965	1	guanylate kinase activity	F
GO:0004386	150	0.186	1	0.000207	0.00826	0.0238	0.497	1.38e-05	0.002	0.519	1	0.00267	0.064	0.436	1	0.161	1	helicase activity	F
GO:0004402	24	0.11	1	0.0147	0.384	0.018	0.236	0.0192	0.41	0.263	1	0.0176	0.565	0.44	1	0.215	1	histone acetyltransferase activity	F
GO:0004407	20	0.0605	1	0.485	1	0.0472	0.868	0.805	1	0.0914	1	0.307	1	0.441	1	0.86	1	histone deacetylase activity	F
GO:0004428	40	0.0127	0.272	0.0341	1	0.00158	0.016	0.0415	1	0.0528	1	0.0785	1	0.179	1	0.203	1	inositol or phosphatidylinositol kinase activity	F
GO:0004434	27	0.792	1	1	1	0.465	1	0.993	1	0.939	1	1	1	0.268	1	1	1	inositol or phosphatidylinositol phosphodiesterase activity	F
GO:0004435	27	0.792	1	1	1	0.465	1	0.993	1	0.939	1	1	1	0.268	1	1	1	phosphoinositide phospholipase C activity	F
GO:0004437	37	0.762	1	0.843	1	0.212	1	0.855	1	0.846	1	0.734	1	0.996	1	0.717	1	inositol or phosphatidylinositol phosphatase activity	F
GO:0004467	10	0.2	1	0.299	1	0.0276	0.497	0.412	1	0.492	1	0.335	1	0.066	1	0.216	1	long-chain-fatty-acid-CoA ligase activity	F
GO:0004468	24	0.11	1	0.0147	0.384	0.018	0.236	0.0192	0.41	0.263	1	0.0176	0.565	0.44	1	0.215	1	lysine N-acetyltransferase activity	F
GO:0004497	135	1	1	1	1	0.998	1	1	1	1	1	1	1	0.999	1	1	1	monooxygenase activity	F
GO:0004499	20	0.314	1	0.398	1	0.661	1	0.225	1	0.245	1	0.462	1	0.243	1	0.684	1	dimethylaniline monooxygenase (N-oxide-forming) activity	F
GO:0004518	148	0.0611	1	0.0533	1	0.00717	0.157	0.0272	0.41	0.139	1	0.14	1	0.557	1	0.976	1	nuclease activity	F
GO:0004519	89	0.178	1	0.259	1	0.0962	1	0.115	1	0.301	1	0.436	1	0.521	1	0.999	1	endonuclease activity	F
GO:0004520	19	0.18	1	0.169	1	0.295	1	0.251	1	0.301	1	0.156	1	0.0844	1	0.972	1	endodeoxyribonuclease activity	F
GO:0004521	39	0.742	1	0.592	1	0.783	1	0.172	1	0.605	1	0.937	1	0.935	1	1	1	endoribonuclease activity	F
GO:0004522	13	0.974	1	1	1	1	1	1	1	0.84	1	0.99	1	0.618	1	0.988	1	pancreatic ribonuclease activity	F
GO:0004526	11	0.759	1	0.146	1	0.646	1	0.128	1	0.666	1	0.442	1	0.994	1	0.946	1	ribonuclease P activity	F
GO:0004527	52	0.248	1	0.0849	1	0.0157	0.192	0.0251	0.41	0.35	1	0.123	1	0.939	1	0.941	1	exonuclease activity	F
GO:0004529	10	0.819	1	0.521	1	0.291	1	0.987	1	0.937	1	0.28	1	0.992	1	0.996	1	exodeoxyribonuclease activity	F
GO:0004532	12	0.334	1	0.0955	1	0.0733	1	0.121	1	0.388	1	0.0772	1	0.69	1	0.962	1	exoribonuclease activity	F
GO:0004536	33	0.0692	1	0.162	1	0.0876	1	0.278	1	0.143	1	0.126	1	0.131	1	0.964	1	deoxyribonuclease activity	F
GO:0004540	59	0.588	1	0.358	1	0.567	1	0.117	1	0.483	1	0.662	1	0.867	1	0.999	1	ribonuclease activity	F
GO:0004549	13	0.559	1	0.171	1	0.668	1	0.14	1	0.375	1	0.564	1	0.955	1	0.975	1	tRNA-specific ribonuclease activity	F
GO:0004550	10	0.295	1	0.777	1	0.36	1	0.44	1	0.224	1	0.909	1	0.627	1	0.934	1	nucleoside diphosphate kinase activity	F
GO:0004553	132	0.252	1	0.126	1	0.133	1	0.0708	1	0.578	1	0.219	1	0.232	1	0.449	1	hydrolase activity, hydrolyzing O-glycosyl compounds	F
GO:0004601	47	0.434	1	1	1	0.198	1	0.908	1	0.61	1	0.999	1	0.513	1	0.999	1	peroxidase activity	F
GO:0004602	10	0.617	1	1	1	0.234	1	0.59	1	0.813	1	1	1	0.999	1	1	1	glutathione peroxidase activity	F
GO:0004620	89	0.559	1	0.944	1	0.112	1	0.432	1	0.819	1	0.976	1	0.53	1	0.962	1	phospholipase activity	F
GO:0004622	11	0.705	1	0.501	1	0.0662	1	0.576	1	0.865	1	0.409	1	0.955	1	0.764	1	lysophospholipase activity	F
GO:0004623	37	0.972	1	0.825	1	0.744	1	0.243	1	0.95	1	0.916	1	0.998	1	0.987	1	phospholipase A2 activity	F
GO:0004629	36	0.21	1	0.997	1	0.105	1	0.966	1	0.484	1	0.995	1	0.0986	1	0.849	1	phospholipase C activity	F
GO:0004653	18	1	1	1	1	0.948	1	0.98	1	1	1	1	1	1	1	1	1	polypeptide N-acetylgalactosaminyltransferase activity	F
GO:0004659	13	0.265	1	0.523	1	0.201	1	0.178	1	0.241	1	0.448	1	0.687	1	1	1	prenyltransferase activity	F
GO:0004672	654	0.778	1	0.725	1	0.00559	0.093	0.0294	0.542	0.842	1	0.753	1	1	1	1	1	protein kinase activity	F
GO:0004673	13	0.713	1	0.992	1	0.506	1	0.949	1	0.773	1	0.955	1	0.562	1	0.966	1	protein histidine kinase activity	F
GO:0004674	534	0.271	1	0.116	1	0.000252	0.006	0.0019	0.027	0.45	1	0.123	1	1	1	0.998	1	protein serine/threonine kinase activity	F
GO:0004675	15	0.715	1	0.951	1	0.346	1	0.377	1	0.748	1	0.942	1	0.974	1	1	1	transmembrane receptor protein serine/threonine kinase activity	F
GO:0004680	10	0.479	1	0.747	1	0.155	1	0.936	1	0.603	1	0.66	1	0.731	1	0.5	1	casein kinase activity	F
GO:0004683	28	0.567	1	0.965	1	0.524	1	0.655	1	0.529	1	0.902	1	0.823	1	1	1	calmodulin regulated protein kinase activity	F
GO:0004689	20	0.789	1	0.988	1	0.794	1	0.653	1	0.769	1	0.96	1	0.91	1	1	1	phosphorylase kinase activity	F
GO:0004693	28	0.212	1	0.127	1	0.0671	1	0.0191	0.41	0.251	1	0.285	1	0.749	1	0.724	1	cyclin-dependent protein kinase activity	F
GO:0004697	15	0.1	1	0.202	1	0.088	1	0.194	1	0.105	1	0.2	1	0.516	1	0.398	1	protein kinase C activity	F
GO:0004702	58	0.728	1	0.619	1	0.265	1	0.352	1	0.823	1	0.63	1	0.845	1	0.849	1	receptor signaling protein serine/threonine kinase activity	F
GO:0004707	19	0.805	1	0.52	1	0.631	1	0.531	1	0.88	1	0.55	1	0.505	1	0.415	1	MAP kinase activity	F
GO:0004708	13	0.793	1	0.862	1	0.706	1	0.987	1	0.591	1	0.692	1	0.896	1	0.998	1	MAP kinase kinase activity	F
GO:0004709	18	0.644	1	0.741	1	0.41	1	0.555	1	0.62	1	0.795	1	0.988	1	0.711	1	MAP kinase kinase kinase activity	F
GO:0004712	14	0.864	1	0.905	1	0.784	1	0.994	1	0.652	1	0.749	1	0.931	1	0.999	1	protein threonine/tyrosine kinase activity	F
GO:0004713	550	0.757	1	0.829	1	0.0379	0.587	0.127	1	0.768	1	0.827	1	1	1	0.998	1	protein-tyrosine kinase activity	F
GO:0004714	124	1	1	1	1	0.985	1	1	1	1	1	1	1	1	1	0.999	1	transmembrane receptor protein tyrosine kinase activity	F
GO:0004715	39	0.236	1	0.193	1	0.243	1	0.0897	1	0.142	1	0.204	1	0.974	1	0.802	1	non-membrane spanning protein tyrosine kinase activity	F
GO:0004716	12	0.213	1	0.203	1	0.0471	0.868	0.121	1	0.29	1	0.205	1	0.988	1	0.55	1	receptor signaling protein tyrosine kinase activity	F
GO:0004721	169	0.689	1	0.155	1	0.0359	0.587	0.0244	0.41	0.922	1	0.356	1	0.981	1	0.518	1	phosphoprotein phosphatase activity	F
GO:0004722	42	0.162	1	0.193	1	0.269	1	0.108	1	0.307	1	0.304	1	0.203	1	0.692	1	protein serine/threonine phosphatase activity	F
GO:0004725	114	0.856	1	0.687	1	0.0845	1	0.179	1	0.968	1	0.871	1	0.999	1	0.574	1	protein tyrosine phosphatase activity	F
GO:0004745	10	0.419	1	0.272	1	0.25	1	0.176	1	0.552	1	0.209	1	0.711	1	0.857	1	retinol dehydrogenase activity	F
GO:0004765	10	0.143	1	0.588	1	0.00988	0.157	0.108	1	0.761	1	0.939	1	0.848	1	0.922	1	shikimate kinase activity	F
GO:0004806	17	0.751	1	0.771	1	0.812	1	0.915	1	0.75	1	0.914	1	0.385	1	0.0554	1	triacylglycerol lipase activity	F
GO:0004812	76	0.00206	0.049	0.00376	0.063	0.0116	0.157	0.198	1	0.00382	0.0624	0.00659	0.105	0.126	1	0.025	0.252	aminoacyl-tRNA ligase activity	F
GO:0004835	14	0.0761	1	0.0497	1	0.154	1	0.0148	0.281	0.0542	1	0.0937	1	0.21	1	0.28	1	tubulin-tyrosine ligase activity	F
GO:0004842	158	0.0355	1	0.00136	0.039	0.000766	0.0125	1.23e-05	0.002	0.178	1	0.0227	0.769	0.326	1	0.113	1	ubiquitin-protein ligase activity	F
GO:0004843	67	0.186	1	0.000902	0.02	0.00842	0.157	8.69e-06	0.000966	0.326	1	0.0197	0.565	0.899	1	0.0313	0.318	ubiquitin-specific protease activity	F
GO:0004857	298	1	1	1	1	0.977	1	1	1	1	1	1	1	1	1	1	1	enzyme inhibitor activity	F
GO:0004859	17	0.945	1	0.929	1	0.696	1	0.999	1	0.902	1	0.653	1	1	1	1	1	phospholipase inhibitor activity	F
GO:0004860	29	0.847	1	0.964	1	0.383	1	0.872	1	0.815	1	0.95	1	1	1	0.769	1	protein kinase inhibitor activity	F
GO:0004864	28	0.654	1	0.973	1	0.24	1	0.65	1	0.644	1	0.995	1	0.959	1	0.971	1	protein phosphatase inhibitor activity	F
GO:0004866	168	1	1	1	1	0.984	1	1	1	1	1	1	1	1	1	1	1	endopeptidase inhibitor activity	F
GO:0004867	114	1	1	1	1	0.914	1	1	1	1	1	1	1	0.999	1	1	1	serine-type endopeptidase inhibitor activity	F
GO:0004869	30	1	1	0.979	1	1	1	1	1	0.999	1	0.829	1	0.901	1	0.999	1	cysteine protease inhibitor activity	F
GO:0004871	2390	1	1	1	1	1	1	1	1	1	1	1	1	1	1	1	1	signal transducer activity	F
GO:0004872	1905	1	1	1	1	1	1	1	1	1	1	1	1	1	1	1	1	receptor activity	F
GO:0004879	182	1	1	0.998	1	0.371	1	0.977	1	1	1	0.987	1	1	1	1	1	ligand-dependent nuclear receptor activity	F
GO:0004886	20	1	1	1	1	0.932	1	1	1	1	1	1	1	1	1	1	1	retinoid-X receptor activity	F
GO:0004887	21	0.519	1	0.617	1	0.139	1	0.544	1	0.764	1	0.644	1	0.903	1	0.43	1	thyroid hormone receptor activity	F
GO:0004888	1286	1	1	1	1	1	1	1	1	1	1	1	1	1	1	1	1	transmembrane receptor activity	F
GO:0004889	18	0.225	1	0.645	1	0.287	1	0.87	1	0.27	1	0.632	1	0.214	1	0.252	1	nicotinic acetylcholine-activated cation-selective channel activity	F
GO:0004890	32	0.922	1	1	1	0.61	1	1	1	0.948	1	1	1	0.907	1	1	1	GABA-A receptor activity	F
GO:0004896	84	0.829	1	0.995	1	0.801	1	0.984	1	0.665	1	0.95	1	0.993	1	1	1	hematopoietin/interferon-class (D200-domain) cytokine receptor activity	F
GO:0004907	62	0.959	1	0.992	1	0.985	1	0.982	1	0.884	1	0.946	1	0.981	1	1	1	interleukin receptor activity	F
GO:0004908	30	1	1	1	1	1	1	1	1	1	1	1	1	1	1	1	1	interleukin-1 receptor activity	F
GO:0004930	780	1	1	1	1	1	1	1	1	1	1	1	1	1	1	1	1	G-protein coupled receptor activity	F
GO:0004935	33	0.998	1	0.847	1	0.569	1	0.269	1	1	1	0.931	1	0.994	1	1	1	adrenoceptor activity	F
GO:0004936	13	0.928	1	0.915	1	0.727	1	0.729	1	0.983	1	0.861	1	0.418	1	0.999	1	alpha-adrenergic receptor activity	F
GO:0004942	12	0.185	1	0.0502	1	0.617	1	0.122	1	0.122	1	0.133	1	0.836	1	0.867	1	anaphylatoxin receptor activity	F
GO:0004945	60	0.988	1	0.99	1	0.984	1	0.559	1	0.943	1	0.973	1	0.973	1	1	1	angiotensin type II receptor activity	F
GO:0004946	17	1	1	1	1	0.844	1	0.959	1	1	1	1	1	0.933	1	1	1	bombesin receptor activity	F
GO:0004947	31	0.597	1	0.178	1	0.985	1	0.114	1	0.465	1	0.169	1	0.798	1	1	1	bradykinin receptor activity	F
GO:0004949	13	0.752	1	0.577	1	0.957	1	0.746	1	0.518	1	0.336	1	1	1	1	1	cannabinoid receptor activity	F
GO:0004950	56	1	1	0.999	1	0.997	1	0.711	1	0.994	1	0.997	1	0.998	1	1	1	chemokine receptor activity	F
GO:0004952	65	0.996	1	0.986	1	0.914	1	0.955	1	0.998	1	0.956	1	0.929	1	1	1	dopamine receptor activity	F
GO:0004953	17	0.831	1	1	1	0.4	1	1	1	0.802	1	0.999	1	1	1	1	1	icosanoid receptor activity	F
GO:0004954	17	0.831	1	1	1	0.4	1	1	1	0.802	1	0.999	1	1	1	1	1	prostanoid receptor activity	F
GO:0004955	17	0.831	1	1	1	0.4	1	1	1	0.802	1	0.999	1	1	1	1	1	prostaglandin receptor activity	F
GO:0004957	13	1	1	1	1	0.989	1	1	1	1	1	0.99	1	1	1	1	1	prostaglandin E receptor activity	F
GO:0004965	28	1	1	0.999	1	1	1	0.858	1	0.992	1	0.997	1	0.998	1	0.999	1	GABA-B receptor activity	F
GO:0004966	39	0.857	1	0.883	1	0.301	1	0.835	1	0.954	1	0.771	1	0.831	1	1	1	galanin receptor activity	F
GO:0004969	58	0.345	1	0.566	1	0.659	1	0.315	1	0.155	1	0.531	1	0.838	1	0.888	1	histamine receptor activity	F
GO:0004970	18	0.951	1	0.999	1	0.512	1	0.994	1	0.98	1	0.996	1	0.931	1	0.999	1	ionotropic glutamate receptor activity	F
GO:0004974	21	1	1	0.335	1	0.939	1	0.242	1	1	1	0.504	1	0.991	1	0.991	1	leukotriene receptor activity	F
GO:0004977	57	1	1	1	1	1	1	0.964	1	1	1	1	1	1	1	0.979	1	melanocortin receptor activity	F
GO:0004981	16	0.921	1	0.825	1	0.618	1	0.312	1	0.788	1	0.8	1	0.989	1	1	1	muscarinic acetylcholine receptor activity	F
GO:0004982	22	0.742	1	0.527	1	0.942	1	0.219	1	0.59	1	0.671	1	0.839	1	1	1	N-formyl peptide receptor activity	F
GO:0004983	78	1	1	1	1	1	1	0.478	1	1	1	1	1	1	1	1	1	neuropeptide Y receptor activity	F
GO:0004984	103	1	1	1	1	1	1	1	1	1	1	1	1	1	1	1	1	olfactory receptor activity	F
GO:0004985	13	0.995	1	0.983	1	0.883	1	0.583	1	0.991	1	0.998	1	1	1	1	1	opioid receptor activity	F
GO:0004992	17	0.996	1	0.818	1	0.959	1	0.51	1	0.983	1	0.801	1	0.999	1	1	1	platelet activating factor receptor activity	F
GO:0004993	10	0.956	1	0.499	1	0.314	1	0.301	1	0.984	1	0.488	1	0.998	1	0.951	1	serotonin receptor activity	F
GO:0004994	18	1	1	0.909	1	0.997	1	0.786	1	0.999	1	0.787	1	1	1	1	1	somatostatin receptor activity	F
GO:0005000	13	1	1	0.971	1	0.926	1	0.855	1	0.996	1	0.977	1	1	1	0.836	1	vasopressin receptor activity	F
GO:0005001	18	1	1	0.999	1	0.926	1	0.984	1	0.999	1	0.999	1	1	1	1	1	transmembrane receptor protein tyrosine phosphatase activity	F
GO:0005003	17	0.993	1	0.866	1	0.659	1	0.566	1	0.998	1	0.997	1	1	1	0.413	1	ephrin receptor activity	F
GO:0005021	71	1	1	1	1	0.982	1	1	1	1	1	1	1	0.998	1	1	1	vascular endothelial growth factor receptor activity	F
GO:0005024	15	0.715	1	0.951	1	0.346	1	0.377	1	0.748	1	0.942	1	0.974	1	1	1	transforming growth factor beta receptor activity	F
GO:0005035	10	1	1	1	1	0.893	1	1	1	1	1	1	1	0.711	1	0.385	1	death receptor activity	F
GO:0005041	12	0.746	1	0.287	1	0.529	1	0.732	1	0.687	1	0.153	1	0.991	1	0.689	1	low-density lipoprotein receptor activity	F
GO:0005044	42	0.976	1	1	1	0.562	1	0.769	1	0.929	1	0.99	1	1	1	1	1	scavenger receptor activity	F
GO:0005048	20	0.0695	1	0.349	1	0.0445	0.724	0.538	1	0.109	1	0.198	1	0.196	1	0.994	1	signal sequence binding	F
GO:0005057	170	0.989	1	0.961	1	0.487	1	0.612	1	0.989	1	0.941	1	0.998	1	0.999	1	receptor signaling protein activity	F
GO:0005066	11	0.871	1	0.791	1	0.509	1	0.225	1	0.819	1	0.803	1	0.621	1	0.992	1	transmembrane receptor protein tyrosine kinase signaling protein activity	F
GO:0005070	45	0.295	1	0.428	1	0.0324	0.587	0.155	1	0.413	1	0.56	1	0.991	1	0.522	1	SH3/SH2 adaptor activity	F
GO:0005080	10	0.879	1	0.933	1	0.326	1	0.925	1	0.894	1	0.902	1	0.999	1	0.487	1	protein kinase C binding	F
GO:0005083	263	0.987	1	0.997	1	0.263	1	0.536	1	0.999	1	0.998	1	0.994	1	1	1	small GTPase regulator activity	F
GO:0005085	152	0.776	1	0.962	1	0.175	1	0.0953	1	0.87	1	0.987	1	0.902	1	1	1	guanyl-nucleotide exchange factor activity	F
GO:0005086	17	0.816	1	0.892	1	0.363	1	0.336	1	0.927	1	0.972	1	0.842	1	0.697	1	ARF guanyl-nucleotide exchange factor activity	F
GO:0005088	91	0.995	1	0.983	1	0.711	1	0.557	1	0.995	1	0.977	1	1	1	1	1	Ras guanyl-nucleotide exchange factor activity	F
GO:0005089	77	0.997	1	0.972	1	0.636	1	0.31	1	0.998	1	0.983	1	1	1	1	1	Rho guanyl-nucleotide exchange factor activity	F
GO:0005095	10	0.39	1	0.731	1	0.825	1	0.995	1	0.207	1	0.638	1	0.642	1	0.776	1	GTPase inhibitor activity	F
GO:0005096	254	0.959	1	0.996	1	0.156	1	0.602	1	0.99	1	0.996	1	0.992	1	0.997	1	GTPase activator activity	F
GO:0005097	59	0.992	1	0.998	1	0.788	1	0.897	1	0.992	1	1	1	0.987	1	0.943	1	Rab GTPase activator activity	F
GO:0005099	97	0.99	1	0.985	1	0.52	1	0.738	1	0.997	1	0.986	1	0.991	1	0.964	1	Ras GTPase activator activity	F
GO:0005100	25	0.763	1	0.439	1	0.203	1	0.493	1	0.913	1	0.287	1	0.925	1	0.803	1	Rho GTPase activator activity	F
GO:0005102	914	1	1	1	1	0.971	1	1	1	1	1	1	1	0.999	1	1	1	receptor binding	F
GO:0005104	10	1	1	1	1	1	1	1	1	1	1	1	1	1	1	0.636	1	fibroblast growth factor receptor binding	F
GO:0005125	252	1	1	1	1	0.843	1	1	1	1	1	1	1	0.754	1	1	1	cytokine activity	F
GO:0005126	32	1	1	1	1	0.838	1	1	1	1	1	1	1	1	1	1	1	hematopoietin/interferon-class (D200-domain) cytokine receptor binding	F
GO:0005149	16	1	1	0.858	1	0.772	1	0.93	1	1	1	0.779	1	1	1	0.492	1	interleukin-1 receptor binding	F
GO:0005154	11	0.965	1	0.982	1	0.964	1	0.966	1	0.946	1	0.991	1	0.667	1	0.631	1	epidermal growth factor receptor binding	F
GO:0005158	22	0.871	1	0.877	1	1	1	0.47	1	0.762	1	0.992	1	0.599	1	0.603	1	insulin receptor binding	F
GO:0005159	13	0.983	1	0.947	1	0.839	1	0.837	1	0.984	1	0.915	1	1	1	1	1	insulin-like growth factor receptor binding	F
GO:0005160	12	0.434	1	0.664	1	0.786	1	0.66	1	0.275	1	0.581	1	0.997	1	0.993	1	transforming growth factor beta receptor binding	F
GO:0005164	41	1	1	0.926	1	0.997	1	0.912	1	1	1	0.846	1	1	1	0.838	1	tumor necrosis factor receptor binding	F
GO:0005178	49	1	1	0.983	1	0.927	1	0.987	1	1	1	0.956	1	1	1	0.999	1	integrin binding	F
GO:0005179	172	1	1	0.997	1	0.838	1	0.67	1	1	1	1	1	1	1	0.993	1	hormone activity	F
GO:0005184	27	0.993	1	1	1	1	1	0.997	1	0.986	1	1	1	0.85	1	0.988	1	neuropeptide hormone activity	F
GO:0005198	928	0.967	1	1	1	0.957	1	0.999	1	0.931	1	1	1	0.735	1	0.971	1	structural molecule activity	F
GO:0005199	77	0.752	1	0.809	1	0.358	1	0.411	1	0.855	1	0.725	1	0.747	1	0.998	1	structural constituent of cell wall	F
GO:0005200	78	0.605	1	0.987	1	0.421	1	0.953	1	0.559	1	0.981	1	0.913	1	0.93	1	structural constituent of cytoskeleton	F
GO:0005201	101	1	1	1	1	0.999	1	1	1	1	1	1	1	0.999	1	1	1	extracellular matrix structural constituent	F
GO:0005212	17	0.51	1	0.764	1	0.446	1	0.999	1	0.389	1	0.34	1	0.964	1	0.988	1	structural constituent of eye lens	F
GO:0005215	1531	0.992	1	0.995	1	0.0124	0.192	0.337	1	0.996	1	0.96	1	1	1	1	1	transporter activity	F
GO:0005216	483	1	1	0.999	1	0.808	1	0.99	1	1	1	0.979	1	1	1	1	1	ion channel activity	F
GO:0005217	13	0.919	1	1	1	0.555	1	0.956	1	0.942	1	1	1	1	1	1	1	intracellular ligand-gated ion channel activity	F
GO:0005230	74	0.835	1	1	1	0.481	1	1	1	0.89	1	0.999	1	0.796	1	0.911	1	extracellular ligand-gated ion channel activity	F
GO:0005231	48	0.581	1	0.964	1	0.353	1	0.992	1	0.651	1	0.938	1	0.702	1	0.593	1	excitatory extracellular ligand-gated ion channel activity	F
GO:0005234	19	0.935	1	0.998	1	0.431	1	0.93	1	0.976	1	0.997	1	0.96	1	0.998	1	glutamate-gated ion channel activity	F
GO:0005242	21	1	1	0.909	1	0.998	1	0.363	1	1	1	0.994	1	0.998	1	0.931	1	inward rectifier potassium channel activity	F
GO:0005244	300	1	1	1	1	0.92	1	0.993	1	1	1	0.999	1	1	1	1	1	voltage-gated ion channel activity	F
GO:0005245	52	0.533	1	0.837	1	0.109	1	0.833	1	0.373	1	0.736	1	1	1	0.795	1	voltage-gated calcium channel activity	F
GO:0005246	15	0.999	1	1	1	0.254	1	0.969	1	1	1	1	1	0.999	1	0.757	1	calcium channel regulator activity	F
GO:0005247	28	0.946	1	0.675	1	0.366	1	0.627	1	0.993	1	0.533	1	0.957	1	0.939	1	voltage-gated chloride channel activity	F
GO:0005248	17	0.999	1	1	1	0.427	1	0.988	1	0.998	1	1	1	1	1	1	1	voltage-gated sodium channel activity	F
GO:0005249	211	1	1	1	1	0.996	1	0.991	1	1	1	1	1	0.994	1	1	1	voltage-gated potassium channel activity	F
GO:0005251	10	1	1	1	1	1	1	1	1	1	1	1	1	1	1	1	1	delayed rectifier potassium channel activity	F
GO:0005253	78	1	1	0.998	1	0.715	1	0.86	1	1	1	0.992	1	0.989	1	1	1	anion channel activity	F
GO:0005254	73	1	1	1	1	0.672	1	0.99	1	1	1	0.999	1	1	1	1	1	chloride channel activity	F
GO:0005261	362	1	1	1	1	0.828	1	0.97	1	1	1	0.998	1	1	1	1	1	cation channel activity	F
GO:0005262	100	0.959	1	0.893	1	0.525	1	0.856	1	0.837	1	0.837	1	1	1	0.805	1	calcium channel activity	F
GO:0005267	229	1	1	1	1	0.997	1	0.988	1	1	1	1	1	0.998	1	1	1	potassium channel activity	F
GO:0005272	34	0.999	1	0.998	1	0.145	1	0.949	1	1	1	1	1	0.999	1	0.473	1	sodium channel activity	F
GO:0005275	67	0.826	1	0.974	1	0.693	1	0.822	1	0.702	1	0.943	1	0.999	1	1	1	amine transporter activity	F
GO:0005279	21	1	1	1	1	0.995	1	1	1	1	1	1	1	0.999	1	1	1	amino acid-polyamine transporter activity	F
GO:0005283	15	1	1	1	1	0.999	1	1	1	1	1	1	1	0.968	1	0.998	1	sodium:amino acid symporter activity	F
GO:0005310	60	0.991	1	0.87	1	0.773	1	0.358	1	0.997	1	0.806	1	0.798	1	1	1	dicarboxylic acid transporter activity	F
GO:0005313	10	0.998	1	0.998	1	0.776	1	0.998	1	1	1	0.998	1	0.998	1	1	1	L-glutamate transporter activity	F
GO:0005319	85	0.44	1	0.941	1	0.047	0.868	0.941	1	0.604	1	0.918	1	0.958	1	0.754	1	lipid transporter activity	F
GO:0005326	25	1	1	1	1	1	1	1	1	1	1	1	1	1	1	0.946	1	neurotransmitter transporter activity	F
GO:0005328	23	1	1	1	1	1	1	1	1	1	1	1	1	1	1	0.949	1	neurotransmitter:sodium symporter activity	F
GO:0005337	17	0.0357	1	0.615	1	0.0099	0.157	0.0459	1	0.419	1	0.81	1	0.998	1	0.906	1	nucleoside transporter activity	F
GO:0005342	124	0.986	1	0.986	1	0.825	1	0.615	1	0.973	1	0.96	1	0.986	1	1	1	organic acid transporter activity	F
GO:0005343	75	1	1	0.983	1	0.975	1	0.518	1	1	1	0.973	1	0.921	1	1	1	organic acid:sodium symporter activity	F
GO:0005344	15	1	1	1	1	1	1	0.659	1	1	1	1	1	1	1	1	1	oxygen transporter activity	F
GO:0005351	44	0.293	1	0.446	1	0.299	1	0.0803	1	0.283	1	0.635	1	0.831	1	0.778	1	sugar porter activity	F
GO:0005355	15	0.241	1	0.56	1	0.549	1	0.606	1	0.217	1	0.547	1	0.754	1	0.763	1	glucose transporter activity	F
GO:0005372	11	1	1	0.765	1	0.993	1	0.846	1	0.998	1	0.493	1	0.988	1	0.996	1	water transporter activity	F
GO:0005375	11	0.557	1	0.376	1	0.271	1	0.108	1	0.811	1	0.403	1	0.338	1	0.977	1	copper ion transporter activity	F
GO:0005385	12	0.733	1	0.149	1	0.893	1	0.541	1	0.547	1	0.0918	1	0.996	1	0.765	1	zinc ion transporter activity	F
GO:0005386	401	0.979	1	0.951	1	0.296	1	0.332	1	0.993	1	0.899	1	0.977	1	1	1	carrier activity	F
GO:0005391	10	0.625	1	0.996	1	0.202	1	0.923	1	0.785	1	0.986	1	0.867	1	0.993	1	sodium:potassium-exchanging ATPase activity	F
GO:0005416	18	1	1	1	1	0.988	1	1	1	1	1	1	1	0.995	1	1	1	cation:amino acid symporter activity	F
GO:0005451	14	0.902	1	0.331	1	0.987	1	0.469	1	0.708	1	0.254	1	0.807	1	0.495	1	monovalent cation:proton antiporter activity	F
GO:0005452	18	0.815	1	0.998	1	0.327	1	0.989	1	0.98	1	0.972	1	0.33	1	0.99	1	inorganic anion exchanger activity	F
GO:0005478	29	0.0254	1	0.0145	0.384	0.00212	0.018	0.015	0.281	0.051	1	0.0297	1	0.63	1	0.602	1	intracellular transporter activity	F
GO:0005484	20	0.274	1	0.125	1	0.0996	1	0.279	1	0.267	1	0.112	1	0.838	1	0.763	1	SNAP receptor activity	F
GO:0005488	12627	1	1	0.852	1	1.22e-08	0	7.49e-07	0	1	1	0.964	1	1	1	1	1	binding	F
GO:0005496	85	1	1	0.983	1	0.456	1	0.931	1	1	1	0.96	1	1	1	0.973	1	steroid binding	F
GO:0005501	17	0.632	1	0.906	1	0.881	1	0.998	1	0.282	1	0.659	1	1	1	1	1	retinoid binding	F
GO:0005504	25	0.11	1	0.0454	1	0.231	1	0.126	1	0.0536	1	0.0314	1	0.742	1	0.858	1	fatty acid binding	F
GO:0005506	319	0.622	1	0.999	1	0.242	1	0.732	1	0.93	1	0.999	1	0.396	1	1	1	iron ion binding	F
GO:0005507	80	0.983	1	1	1	0.844	1	0.876	1	0.98	1	1	1	0.943	1	0.955	1	copper ion binding	F
GO:0005509	1014	1	1	1	1	0.357	1	0.99	1	1	1	1	1	1	1	1	1	calcium ion binding	F
GO:0005515	7459	0.998	1	0.55	1	1.02e-06	0.000848	2.4e-06	0	1	1	0.88	1	1	1	0.997	1	protein binding	F
GO:0005516	147	0.768	1	0.924	1	0.169	1	0.918	1	0.902	1	0.838	1	0.888	1	0.991	1	calmodulin binding	F
GO:0005518	18	0.84	1	0.999	1	0.162	1	1	1	0.991	1	0.971	1	0.587	1	1	1	collagen binding	F
GO:0005520	25	0.999	1	0.994	1	0.968	1	0.646	1	0.997	1	0.999	1	1	1	0.796	1	insulin-like growth factor binding	F
GO:0005523	13	0.617	1	0.949	1	0.686	1	0.298	1	0.594	1	0.999	1	0.585	1	0.498	1	tropomyosin binding	F
GO:0005524	1571	0.000269	0.011	2.54e-06	0.00141	7.34e-10	0	1.49e-07	0	0.0169	0.381	7.86e-05	0.00229	0.869	1	0.741	1	ATP binding	F
GO:0005525	398	0.113	1	0.12	1	0.000542	0.0125	0.0321	0.542	0.582	1	0.394	1	0.871	1	0.772	1	GTP binding	F
GO:0005529	195	1	1	0.972	1	0.843	1	0.782	1	0.997	1	0.994	1	1	1	0.383	1	sugar binding	F
GO:0005537	13	0.975	1	0.995	1	1	1	0.976	1	0.966	1	1	1	0.327	1	0.297	1	mannose binding	F
GO:0005539	107	0.988	1	1	1	0.905	1	1	1	0.944	1	1	1	0.998	1	0.993	1	glycosaminoglycan binding	F
GO:0005540	17	0.155	1	0.973	1	0.201	1	0.907	1	0.219	1	0.939	1	0.277	1	0.975	1	hyaluronic acid binding	F
GO:0005542	13	0.969	1	0.373	1	0.251	1	0.555	1	0.982	1	0.491	1	1	1	0.271	1	folic acid binding	F
GO:0005543	149	0.261	1	0.0297	1	0.00213	0.018	0.00192	0.027	0.43	1	0.0448	1	0.988	1	0.878	1	phospholipid binding	F
GO:0005544	24	0.777	1	0.989	1	0.149	1	0.974	1	0.891	1	0.936	1	0.99	1	0.994	1	calcium-dependent phospholipid binding	F
GO:0005545	16	0.188	1	0.168	1	0.0549	1	0.0395	1	0.222	1	0.267	1	0.695	1	0.255	1	phosphatidylinositol binding	F
GO:0005548	30	0.73	1	0.681	1	0.22	1	0.842	1	0.892	1	0.356	1	0.863	1	0.978	1	phospholipid transporter activity	F
GO:0005575	15522	1	1	1	1	0.000995	0.0125	0.000198	0.007	1	1	1	1	1	1	1	1	cellular_component	C
GO:0005576	2042	1	1	1	1	1	1	1	1	1	1	1	1	1	1	1	1	extracellular region	C
GO:0005578	343	1	1	1	1	1	1	1	1	1	1	1	1	1	1	1	1	extracellular matrix (sensu Metazoa)	C
GO:0005581	37	1	1	1	1	1	1	1	1	1	1	1	1	1	1	1	1	collagen	C
GO:0005604	74	1	1	1	1	0.974	1	1	1	1	1	1	1	1	1	0.946	1	basement membrane	C
GO:0005605	29	0.999	1	0.983	1	0.53	1	0.996	1	1	1	0.996	1	0.985	1	0.289	1	basal lamina	C
GO:0005615	515	1	1	1	1	0.994	1	1	1	1	1	1	1	1	1	1	1	extracellular space	C
GO:0005622	10581	0.185	1	1.18e-09	0.001	1.4e-15	0	1.89e-21	0	0.77	1	0.000172	0.00229	1	1	0.853	1	intracellular	C
GO:0005623	14225	1	1	0.952	1	1.23e-05	0.000971	1.44e-07	0	1	1	0.988	1	1	1	1	1	cell	C
GO:0005624	652	0.998	1	0.974	1	0.61	1	0.0904	1	0.998	1	0.979	1	1	1	1	1	membrane fraction	C
GO:0005625	227	0.996	1	0.842	1	0.692	1	0.651	1	0.997	1	0.815	1	0.999	1	0.918	1	soluble fraction	C
GO:0005626	23	0.189	1	0.367	1	0.262	1	0.458	1	0.331	1	0.319	1	0.194	1	0.449	1	insoluble fraction	C
GO:0005634	4748	0.228	1	4.94e-19	0	1.54e-07	0	1.38e-20	0	0.633	1	7.92e-12	0.000105	0.998	1	0.115	1	nucleus	C
GO:0005635	201	0.00344	0.137	4.75e-06	0.00141	2.5e-06	0.000848	6.92e-06	0.000832	0.0113	0.301	0.000135	0.00229	0.922	1	0.0367	0.554	nuclear envelope	C
GO:0005637	21	0.782	1	0.183	1	0.35	1	0.587	1	0.862	1	0.227	1	0.825	1	0.186	1	nuclear inner membrane	C
GO:0005640	15	0.323	1	0.499	1	0.1	1	0.51	1	0.532	1	0.971	1	0.399	1	0.155	1	nuclear outer membrane	C
GO:0005643	70	3.82e-05	0.005	1.61e-09	0.001	2.55e-06	0.000848	6.19e-07	0	0.000272	0.004	9.39e-08	0.000105	0.0853	1	0.000226	0.0005	nuclear pore	C
GO:0005654	736	7.07e-05	0.005	9.47e-11	0	1.97e-08	0	1.82e-08	0	0.00365	0.0624	5.47e-08	0.000105	0.806	1	0.0262	0.252	nucleoplasm	C
GO:0005657	30	0.0528	1	0.015	0.384	0.00205	0.018	0.00457	0.0684	0.0654	1	0.0463	1	0.894	1	0.273	1	replication fork	C
GO:0005665	14	0.339	1	0.131	1	0.183	1	0.751	1	0.683	1	0.0675	1	0.617	1	0.683	1	DNA-directed RNA polymerase II, core complex	C
GO:0005667	221	0.321	1	0.138	1	0.008	0.157	0.067	1	0.423	1	0.145	1	0.997	1	0.916	1	transcription factor complex	C
GO:0005669	24	0.0179	0.562	0.00368	0.063	0.00585	0.093	0.148	1	0.0473	1	0.00136	0.017	0.887	1	0.398	1	transcription factor TFIID complex	C
GO:0005680	12	0.0694	1	0.0262	1	0.0415	0.587	0.0232	0.41	0.0824	1	0.0377	1	0.892	1	0.657	1	anaphase-promoting complex	C
GO:0005681	135	0.002	0.049	0.000116	0.004	0.000432	0.0125	0.000329	0.007	0.0342	0.655	0.000631	0.0102	0.0863	1	0.133	1	spliceosome complex	C
GO:0005684	10	0.000482	0.016	0.0145	0.384	0.000412	0.0125	0.0668	1	0.013	0.301	0.0223	0.769	0.0517	1	0.0867	1	major (U2-dependent) spliceosome	C
GO:0005689	11	0.047	1	0.00182	0.039	0.00498	0.093	0.0167	0.41	0.0615	1	0.0113	0.212	0.813	1	0.0596	1	minor (U12-dependent) spliceosome complex	C
GO:0005694	435	0.0134	0.272	0.000232	0.00826	0.000965	0.0125	0.00029	0.007	0.0316	0.655	0.00115	0.0102	0.865	1	0.324	1	chromosome	C
GO:0005720	24	0.671	1	0.165	1	0.288	1	0.458	1	0.683	1	0.192	1	0.995	1	0.0813	1	nuclear heterochromatin	C
GO:0005730	174	0.0284	1	0.000282	0.00826	0.273	1	0.00482	0.0684	0.0344	0.655	0.00543	0.074	0.194	1	0.292	1	nucleolus	C
GO:0005732	15	0.403	1	0.145	1	0.256	1	0.15	1	0.43	1	0.295	1	0.97	1	0.668	1	small nucleolar ribonucleoprotein complex	C
GO:0005737	6633	0.0138	0.272	6.03e-05	0.004	3.59e-15	0	1.42e-16	0	0.344	1	0.032	1	0.994	1	0.925	1	cytoplasm	C
GO:0005739	951	1.47e-09	0.000125	5.69e-10	0.001	1.34e-08	0	1.29e-08	0	3.13e-06	0.0005	1.75e-07	0.000222	0.0658	1	0.21	1	mitochondrion	C
GO:0005740	390	0.000399	0.016	8.1e-05	0.004	5.89e-05	0.00457	0.000476	0.00717	0.0155	0.301	0.000371	0.0102	0.148	1	0.271	1	mitochondrial envelope	C
GO:0005741	73	0.283	1	0.0311	1	0.243	1	0.0722	1	0.661	1	0.0501	1	0.051	1	0.318	1	mitochondrial outer membrane	C
GO:0005743	284	0.00039	0.016	0.000736	0.019	0.000891	0.0125	0.000974	0.0111	0.00295	0.05	0.00237	0.051	0.184	1	0.401	1	mitochondrial inner membrane	C
GO:0005744	12	0.222	1	0.0444	1	0.163	1	0.0126	0.157	0.587	1	0.113	1	0.209	1	0.389	1	mitochondrial inner membrane presequence translocase complex	C
GO:0005746	64	0.0309	1	0.014	0.384	0.38	1	0.0489	1	0.0301	0.655	0.0455	1	0.136	1	0.115	1	mitochondrial electron transport chain	C
GO:0005747	37	0.00371	0.137	0.00149	0.039	0.23	1	0.026	0.41	0.000635	0.0049	0.0021	0.051	0.565	1	0.0997	1	respiratory chain complex I (sensu Eukaryota)	C
GO:0005753	16	0.014	0.272	0.193	1	0.039	0.587	0.366	1	0.107	1	0.172	1	0.254	1	0.465	1	proton-transporting ATP synthase complex (sensu Eukaryota)	C
GO:0005758	28	0.795	1	0.386	1	0.379	1	0.0688	1	0.937	1	0.504	1	0.789	1	0.827	1	mitochondrial intermembrane space	C
GO:0005759	195	0.00212	0.049	0.00106	0.02	0.096	1	0.00275	0.056	0.00236	0.043	0.0101	0.212	0.277	1	0.644	1	mitochondrial matrix	C
GO:0005761	50	0.109	1	0.279	1	0.973	1	0.114	1	0.0191	0.381	0.439	1	0.75	1	0.729	1	mitochondrial ribosome	C
GO:0005762	17	0.838	1	0.691	1	0.997	1	0.345	1	0.376	1	0.668	1	1	1	0.886	1	mitochondrial large ribosomal subunit	C
GO:0005763	20	0.0225	1	0.577	1	0.996	1	0.384	1	0.0087	0.202	0.764	1	0.18	1	0.34	1	mitochondrial small ribosomal subunit	C
GO:0005764	213	0.22	1	0.0804	1	0.0454	0.868	0.00939	0.112	0.308	1	0.128	1	0.737	1	0.755	1	lysosome	C
GO:0005765	62	0.112	1	0.0924	1	0.0761	1	0.0124	0.157	0.0699	1	0.125	1	0.991	1	0.807	1	lysosomal membrane	C
GO:0005768	233	0.257	1	0.163	1	0.0219	0.263	0.00452	0.0684	0.269	1	0.318	1	0.999	1	0.639	1	endosome	C
GO:0005769	65	0.0443	1	0.00168	0.039	0.0312	0.565	0.00541	0.081	0.0685	1	0.0141	0.565	0.675	1	0.0169	0.177	early endosome	C
GO:0005770	60	0.129	1	0.125	1	0.175	1	0.0165	0.41	0.0585	1	0.164	1	1	1	0.749	1	late endosome	C
GO:0005773	236	0.233	1	0.0484	1	0.111	1	0.0038	0.0684	0.235	1	0.0741	1	0.769	1	0.845	1	vacuole	C
GO:0005774	73	0.231	1	0.12	1	0.178	1	0.0057	0.081	0.127	1	0.177	1	0.998	1	0.919	1	vacuolar membrane	C
GO:0005776	10	0.0276	1	0.00905	0.384	0.565	1	0.089	1	0.0312	0.655	0.000783	0.0102	0.256	1	0.38	1	autophagic vacuole	C
GO:0005777	98	0.00533	0.137	0.0761	1	0.00851	0.157	0.00307	0.056	0.0487	1	0.253	1	0.422	1	0.732	1	peroxisome	C
GO:0005778	42	0.0311	1	0.347	1	0.097	1	0.0805	1	0.0729	1	0.56	1	0.437	1	0.444	1	peroxisomal membrane	C
GO:0005779	12	0.121	1	0.575	1	0.118	1	0.726	1	0.188	1	0.44	1	0.775	1	0.568	1	integral to peroxisomal membrane	C
GO:0005783	863	0.438	1	0.153	1	0.00153	0.016	0.000542	0.00717	0.582	1	0.451	1	0.999	1	0.883	1	endoplasmic reticulum	C
GO:0005788	69	0.0635	1	0.0643	1	0.00623	0.093	0.115	1	0.162	1	0.0535	1	0.243	1	0.539	1	endoplasmic reticulum lumen	C
GO:0005789	506	0.592	1	0.302	1	0.00189	0.018	0.00312	0.056	0.788	1	0.691	1	0.999	1	0.832	1	endoplasmic reticulum membrane	C
GO:0005790	10	0.64	1	0.847	1	0.295	1	0.367	1	0.869	1	0.842	1	0.667	1	1	1	smooth endoplasmic reticulum	C
GO:0005791	17	0.408	1	0.371	1	0.452	1	0.566	1	0.28	1	0.359	1	0.885	1	0.424	1	rough endoplasmic reticulum	C
GO:0005792	182	0.998	1	0.944	1	0.666	1	0.199	1	0.999	1	0.986	1	0.998	1	0.99	1	microsome	C
GO:0005793	34	0.0229	1	0.0518	1	0.0141	0.192	0.00676	0.081	0.018	0.381	0.196	1	0.986	1	0.44	1	ER-Golgi intermediate compartment	C
GO:0005794	688	0.421	1	0.0183	0.924	1.23e-06	0.000848	1.64e-05	0.002	0.835	1	0.13	1	1	1	0.878	1	Golgi apparatus	C
GO:0005795	19	0.318	1	0.111	1	0.0758	1	0.0228	0.41	0.386	1	0.157	1	1	1	0.908	1	Golgi stack	C
GO:0005798	53	0.0485	1	0.0188	0.924	0.0127	0.192	0.0185	0.41	0.0615	1	0.0709	1	0.857	1	0.0707	1	Golgi-associated vesicle	C
GO:0005801	14	0.258	1	0.0293	1	0.14	1	0.114	1	0.344	1	0.0786	1	0.528	1	0.00102	0.0095	Golgi cis face	C
GO:0005802	27	0.285	1	0.0349	1	0.0174	0.236	0.0117	0.127	0.395	1	0.0804	1	0.999	1	0.848	1	Golgi trans face	C
GO:0005811	13	0.244	1	0.0205	0.924	0.197	1	0.0841	1	0.265	1	0.111	1	0.247	1	0.0755	1	lipid particle	C
GO:0005813	141	0.103	1	0.00282	0.051	0.0349	0.587	0.00234	0.027	0.325	1	0.015	0.565	0.442	1	0.0989	1	centrosome	C
GO:0005814	10	0.168	1	0.024	1	0.0575	1	0.0879	1	0.494	1	0.0392	1	0.056	1	0.0624	1	centriole	C
GO:0005815	162	0.153	1	0.013	0.384	0.0307	0.565	0.00556	0.081	0.472	1	0.0472	1	0.416	1	0.203	1	microtubule organizing center	C
GO:0005819	89	0.127	1	0.000647	0.019	0.0519	1	0.0124	0.157	0.144	1	0.00117	0.0102	0.874	1	0.0284	0.252	spindle	C
GO:0005829	973	0.016	0.31	2.15e-06	0.00141	1.32e-05	0.000971	9.76e-10	0	0.346	1	0.000124	0.00229	0.711	1	0.514	1	cytosol	C
GO:0005833	14	1	1	1	1	1	1	0.959	1	1	1	1	1	1	1	1	1	hemoglobin complex	C
GO:0005834	27	0.95	1	0.849	1	0.987	1	0.992	1	0.899	1	0.696	1	0.71	1	0.629	1	heterotrimeric G-protein complex	C
GO:0005839	23	0.337	1	0.642	1	0.67	1	0.168	1	0.225	1	0.704	1	0.611	1	0.9	1	proteasome core complex (sensu Eukaryota)	C
GO:0005840	296	0.0824	1	0.112	1	0.984	1	0.16	1	0.0639	1	0.173	1	0.193	1	0.338	1	ribosome	C
GO:0005844	12	0.512	1	0.718	1	0.148	1	0.373	1	0.708	1	0.7	1	0.474	1	0.997	1	polysome	C
GO:0005852	12	0.0201	1	0.00438	0.063	0.0865	1	0.0591	1	0.0653	1	0.00948	0.143	0.0356	0.962	0.0216	0.177	eukaryotic translation initiation factor 3 complex	C
GO:0005856	1142	0.79	1	0.811	1	0.000564	0.0125	0.31	1	0.977	1	0.789	1	0.997	1	0.972	1	cytoskeleton	C
GO:0005858	13	0.505	1	0.345	1	0.28	1	0.244	1	0.439	1	0.39	1	0.995	1	0.395	1	axonemal dynein complex	C
GO:0005863	18	0.334	1	0.989	1	0.312	1	0.864	1	0.349	1	0.972	1	0.671	1	0.999	1	striated muscle thick filament	C
GO:0005865	13	0.728	1	0.971	1	0.403	1	0.859	1	0.846	1	0.972	1	0.905	1	0.999	1	striated muscle thin filament	C
GO:0005871	18	0.00928	0.177	0.00966	0.384	0.0418	0.587	0.0245	0.41	0.00383	0.0624	0.00804	0.105	0.585	1	0.325	1	kinesin complex	C
GO:0005874	255	0.0129	0.272	0.0104	0.384	1.69e-05	0.000971	0.000501	0.00717	0.0833	1	0.0225	0.769	0.734	1	0.499	1	microtubule	C
GO:0005875	117	0.0975	1	0.068	1	0.00335	0.035	0.00684	0.081	0.151	1	0.112	1	0.903	1	0.547	1	microtubule associated complex	C
GO:0005876	19	0.00169	0.049	0.00367	0.063	0.00157	0.016	0.00353	0.056	0.00791	0.202	0.0324	1	0.492	1	0.0437	0.81	spindle microtubule	C
GO:0005882	106	1	1	1	1	0.963	1	1	1	1	1	1	1	0.974	1	1	1	intermediate filament	C
GO:0005884	30	0.248	1	0.598	1	0.0878	1	0.224	1	0.264	1	0.685	1	0.863	1	0.568	1	actin filament	C
GO:0005886	2991	1	1	1	1	0.999	1	1	1	1	1	1	1	1	1	1	1	plasma membrane	C
GO:0005887	1190	1	1	1	1	0.998	1	1	1	1	1	1	1	1	1	1	1	integral to plasma membrane	C
GO:0005891	32	0.857	1	0.976	1	0.171	1	0.977	1	0.857	1	0.907	1	1	1	0.999	1	voltage-gated calcium channel complex	C
GO:0005892	14	0.322	1	0.687	1	0.199	1	0.867	1	0.567	1	0.591	1	0.0942	1	0.535	1	nicotinic acetylcholine-gated receptor-channel complex	C
GO:0005901	36	0.159	1	0.837	1	0.193	1	0.214	1	0.14	1	0.944	1	0.859	1	0.746	1	caveola	C
GO:0005902	16	0.991	1	0.924	1	0.383	1	0.438	1	0.997	1	0.955	1	1	1	0.979	1	microvillus	C
GO:0005903	27	0.951	1	0.991	1	0.983	1	0.864	1	0.834	1	0.977	1	0.996	1	1	1	brush border	C
GO:0005905	38	0.135	1	0.15	1	0.015	0.192	0.0107	0.123	0.161	1	0.275	1	0.998	1	0.702	1	coated pit	C
GO:0005911	169	0.887	1	0.966	1	0.582	1	0.835	1	0.905	1	0.913	1	0.922	1	0.973	1	intercellular junction	C
GO:0005912	71	0.646	1	0.81	1	0.158	1	0.0938	1	0.638	1	0.884	1	1	1	0.989	1	adherens junction	C
GO:0005913	25	0.994	1	0.592	1	0.613	1	0.239	1	0.999	1	0.653	1	1	1	0.725	1	cell-cell adherens junction	C
GO:0005921	28	0.965	1	0.732	1	0.898	1	0.857	1	0.996	1	0.802	1	0.5	1	0.198	1	gap junction	C
GO:0005922	22	0.874	1	0.723	1	0.812	1	0.848	1	0.977	1	0.841	1	0.371	1	0.168	1	connexon complex	C
GO:0005923	82	0.136	1	0.52	1	0.13	1	0.327	1	0.108	1	0.349	1	0.688	1	0.996	1	tight junction	C
GO:0005924	44	0.362	1	0.849	1	0.118	1	0.389	1	0.292	1	0.835	1	1	1	0.992	1	cell-substrate adherens junction	C
GO:0005925	40	0.656	1	0.789	1	0.347	1	0.404	1	0.53	1	0.766	1	1	1	0.979	1	focal adhesion	C
GO:0005929	85	0.804	1	0.321	1	0.24	1	0.0738	1	0.827	1	0.429	1	0.986	1	0.69	1	cilium	C
GO:0005930	22	0.626	1	0.412	1	0.266	1	0.323	1	0.665	1	0.373	1	0.958	1	0.814	1	axoneme	C
GO:0005932	13	0.828	1	0.88	1	0.0495	0.868	0.283	1	0.983	1	0.923	1	0.964	1	0.782	1	basal body	C
GO:0005938	81	0.434	1	0.668	1	0.04	0.587	0.543	1	0.575	1	0.83	1	0.951	1	0.287	1	cell cortex	C
GO:0005941	51	0.979	1	0.802	1	0.936	1	0.377	1	0.982	1	0.873	1	0.969	1	0.883	1	unlocalized protein complex	C
GO:0005942	18	0.064	1	0.0525	1	0.0175	0.236	0.35	1	0.0846	1	0.0591	1	0.515	1	0.113	1	phosphoinositide 3-kinase complex	C
GO:0005952	24	0.956	1	0.904	1	0.923	1	0.894	1	0.964	1	0.942	1	0.881	1	0.576	1	cAMP-dependent protein kinase complex	C
GO:0005964	19	0.732	1	0.98	1	0.713	1	0.626	1	0.707	1	0.94	1	0.918	1	1	1	phosphorylase kinase complex	C
GO:0005975	548	0.234	1	0.046	1	0.00912	0.157	0.00223	0.027	0.433	1	0.102	1	0.91	1	0.95	1	carbohydrate metabolism	P
GO:0005976	88	0.872	1	0.992	1	0.229	1	0.795	1	0.922	1	0.987	1	1	1	1	1	polysaccharide metabolism	P
GO:0005977	55	0.71	1	0.999	1	0.105	1	0.988	1	0.88	1	0.998	1	0.999	1	0.995	1	glycogen metabolism	P
GO:0005978	30	0.664	1	1	1	0.189	1	0.964	1	0.84	1	0.998	1	0.978	1	1	1	glycogen biosynthesis	P
GO:0005996	181	0.0832	1	0.0534	1	0.00909	0.157	0.0639	1	0.138	1	0.069	1	0.878	1	0.455	1	monosaccharide metabolism	P
GO:0006000	13	0.468	1	0.442	1	0.648	1	0.369	1	0.525	1	0.673	1	0.276	1	0.111	1	fructose metabolism	P
GO:0006004	14	0.712	1	0.104	1	0.875	1	0.139	1	0.609	1	0.146	1	0.681	1	0.14	1	fucose metabolism	P
GO:0006006	129	0.0427	1	0.13	1	0.013	0.192	0.232	1	0.0588	1	0.141	1	0.78	1	0.43	1	glucose metabolism	P
GO:0006007	72	0.0108	0.177	0.0239	1	0.00229	0.018	0.128	1	0.0317	0.655	0.0417	1	0.649	1	0.107	1	glucose catabolism	P
GO:0006022	45	0.359	1	0.601	1	0.237	1	0.483	1	0.4	1	0.607	1	0.53	1	0.608	1	aminoglycan metabolism	P
GO:0006023	20	0.335	1	0.343	1	0.242	1	0.62	1	0.285	1	0.291	1	0.837	1	0.434	1	aminoglycan biosynthesis	P
GO:0006024	20	0.335	1	0.343	1	0.242	1	0.62	1	0.285	1	0.291	1	0.837	1	0.434	1	glycosaminoglycan biosynthesis	P
GO:0006029	33	0.984	1	0.963	1	0.767	1	0.529	1	0.986	1	0.916	1	0.982	1	1	1	proteoglycan metabolism	P
GO:0006030	10	1	1	0.998	1	1	1	0.755	1	1	1	1	1	0.688	1	0.997	1	chitin metabolism	P
GO:0006040	33	0.723	1	0.174	1	0.935	1	0.501	1	0.559	1	0.125	1	0.633	1	0.43	1	amino sugar metabolism	P
GO:0006041	27	0.849	1	0.218	1	0.971	1	0.364	1	0.656	1	0.167	1	0.88	1	0.55	1	glucosamine metabolism	P
GO:0006044	27	0.849	1	0.218	1	0.971	1	0.364	1	0.656	1	0.167	1	0.88	1	0.55	1	N-acetylglucosamine metabolism	P
GO:0006066	397	0.634	1	0.15	1	0.0103	0.157	0.026	0.41	0.852	1	0.21	1	0.985	1	0.914	1	alcohol metabolism	P
GO:0006071	36	0.835	1	0.525	1	0.672	1	0.271	1	0.912	1	0.458	1	0.619	1	0.986	1	glycerol metabolism	P
GO:0006072	19	0.954	1	0.726	1	0.902	1	0.37	1	0.989	1	0.884	1	0.386	1	0.762	1	glycerol-3-phosphate metabolism	P
GO:0006073	56	0.742	1	1	1	0.123	1	0.99	1	0.897	1	0.999	1	0.999	1	0.995	1	glucan metabolism	P
GO:0006081	18	0.596	1	0.581	1	0.121	1	0.286	1	0.759	1	0.487	1	0.805	1	0.997	1	aldehyde metabolism	P
GO:0006082	679	0.188	1	0.231	1	0.000122	0.00457	0.135	1	0.466	1	0.187	1	0.996	1	0.904	1	organic acid metabolism	P
GO:0006084	28	0.219	1	0.0743	1	0.0346	0.587	0.552	1	0.354	1	0.0214	0.769	0.964	1	0.734	1	acetyl-CoA metabolism	P
GO:0006090	29	0.802	1	0.725	1	0.426	1	0.649	1	0.672	1	0.649	1	1	1	0.756	1	pyruvate metabolism	P
GO:0006091	318	0.0074	0.137	0.0453	1	0.00177	0.016	0.0752	1	0.0141	0.301	0.0676	1	0.886	1	0.527	1	generation of precursor metabolites and energy	P
GO:0006092	122	0.0108	0.177	0.0203	0.924	0.00223	0.018	0.0882	1	0.0153	0.301	0.0195	0.565	0.962	1	0.32	1	main pathways of carbohydrate metabolism	P
GO:0006094	26	0.656	1	0.672	1	0.309	1	0.569	1	0.538	1	0.595	1	0.999	1	0.768	1	gluconeogenesis	P
GO:0006096	61	0.0953	1	0.136	1	0.0345	0.587	0.409	1	0.0917	1	0.11	1	0.966	1	0.41	1	glycolysis	P
GO:0006098	10	0.0525	1	0.0691	1	0.0223	0.263	0.0499	1	0.155	1	0.232	1	0.154	1	0.0588	1	pentose-phosphate shunt	P
GO:0006099	24	0.209	1	0.0659	1	0.047	0.868	0.507	1	0.337	1	0.0186	0.565	0.913	1	0.797	1	tricarboxylic acid cycle	P
GO:0006100	22	0.392	1	0.365	1	0.185	1	0.339	1	0.39	1	0.269	1	0.96	1	0.915	1	tricarboxylic acid cycle intermediate metabolism	P
GO:0006109	18	0.169	1	0.544	1	0.11	1	0.165	1	0.0724	1	0.558	1	1	1	0.985	1	regulation of carbohydrate metabolism	P
GO:0006110	10	0.148	1	0.221	1	0.264	1	0.175	1	0.0247	0.655	0.234	1	1	1	0.552	1	regulation of glycolysis	P
GO:0006112	62	0.677	1	0.981	1	0.0914	1	0.395	1	0.841	1	0.997	1	0.999	1	0.986	1	energy reserve metabolism	P
GO:0006118	58	0.00762	0.137	0.0062	0.15	0.308	1	0.0617	1	0.00188	0.043	0.0164	0.565	0.221	1	0.0605	1	electron transport	P
GO:0006119	75	4.73e-05	0.005	0.00387	0.063	0.0313	0.565	0.0384	1	0.000225	0.004	0.00746	0.105	0.0525	1	0.136	1	oxidative phosphorylation	P
GO:0006120	38	0.01	0.177	0.00484	0.115	0.279	1	0.0679	1	0.00191	0.043	0.00436	0.074	0.569	1	0.139	1	mitochondrial electron transport, NADH to ubiquinone	P
GO:0006139	3977	0.13	1	2.6e-14	0	3.5e-09	0	2.42e-16	0	0.442	1	5.66e-09	0.000105	1	1	0.246	1	nucleobase, nucleoside, nucleotide and nucleic acid metabolism	P
GO:0006140	15	0.745	1	0.885	1	0.333	1	0.899	1	0.751	1	0.754	1	0.931	1	0.999	1	regulation of nucleotide metabolism	P
GO:0006144	10	0.45	1	0.0302	1	0.6	1	0.056	1	0.34	1	0.025	0.769	0.473	1	0.132	1	purine base metabolism	P
GO:0006163	78	0.0262	1	0.085	1	0.0184	0.236	0.0608	1	0.0637	1	0.112	1	0.567	1	0.746	1	purine nucleotide metabolism	P
GO:0006164	63	0.0628	1	0.169	1	0.043	0.724	0.154	1	0.156	1	0.158	1	0.303	1	0.727	1	purine nucleotide biosynthesis	P
GO:0006171	19	1	1	1	1	0.999	1	0.985	1	0.996	1	1	1	0.996	1	1	1	cAMP biosynthesis	P
GO:0006182	13	0.988	1	1	1	0.455	1	1	1	0.982	1	0.999	1	1	1	0.999	1	cGMP biosynthesis	P
GO:0006183	10	0.295	1	0.777	1	0.36	1	0.44	1	0.224	1	0.909	1	0.627	1	0.934	1	GTP biosynthesis	P
GO:0006206	10	0.00715	0.137	0.351	1	0.0253	0.497	0.0982	1	0.18	1	0.477	1	0.115	1	0.805	1	pyrimidine base metabolism	P
GO:0006213	13	0.77	1	0.576	1	0.177	1	0.218	1	1	1	0.76	1	0.786	1	0.916	1	pyrimidine nucleoside metabolism	P
GO:0006220	31	0.353	1	0.509	1	0.0953	1	0.121	1	0.68	1	0.787	1	0.785	1	0.597	1	pyrimidine nucleotide metabolism	P
GO:0006221	22	0.273	1	0.288	1	0.187	1	0.0666	1	0.38	1	0.525	1	0.462	1	0.72	1	pyrimidine nucleotide biosynthesis	P
GO:0006228	10	0.295	1	0.777	1	0.36	1	0.44	1	0.224	1	0.909	1	0.627	1	0.934	1	UTP biosynthesis	P
GO:0006241	11	0.31	1	0.753	1	0.354	1	0.331	1	0.273	1	0.912	1	0.629	1	0.966	1	CTP biosynthesis	P
GO:0006259	824	4.08e-05	0.005	1.28e-10	0	3.67e-10	0	2.82e-09	0	0.00208	0.043	1.84e-07	0.000222	0.995	1	0.0193	0.177	DNA metabolism	P
GO:0006260	220	8.14e-07	0.000125	2.71e-07	0.001	8.25e-08	0	1.23e-05	0.002	0.000297	0.004	2.58e-05	0.00229	0.667	1	0.0487	0.81	DNA replication	P
GO:0006261	118	3.09e-05	0.005	6.86e-05	0.004	9.93e-05	0.00457	0.0177	0.41	0.00111	0.043	0.000204	0.0029	0.474	1	0.0715	1	DNA-dependent DNA replication	P
GO:0006265	24	0.192	1	0.232	1	0.137	1	0.153	1	0.351	1	0.233	1	0.145	1	0.947	1	DNA topological change	P
GO:0006268	12	0.179	1	0.06	1	0.0898	1	0.583	1	0.699	1	0.196	1	0.138	1	0.1	1	DNA unwinding during replication	P
GO:0006270	26	0.24	1	0.0481	1	0.17	1	0.122	1	0.378	1	0.0709	1	0.2	1	0.111	1	DNA replication initiation	P
GO:0006275	46	0.139	1	0.273	1	0.0682	1	0.0577	1	0.226	1	0.519	1	0.512	1	0.45	1	regulation of DNA replication	P
GO:0006281	298	0.00246	0.049	9.72e-07	0.001	8.74e-05	0.00457	3.95e-06	0.000832	0.0136	0.301	6.37e-05	0.00229	0.97	1	0.0528	0.81	DNA repair	P
GO:0006284	27	0.0935	1	0.0881	1	0.101	1	0.0305	0.542	0.0836	1	0.113	1	0.579	1	0.998	1	base-excision repair	P
GO:0006289	58	0.023	1	0.0175	0.924	0.0847	1	0.0541	1	0.026	0.655	0.0857	1	0.275	1	0.139	1	nucleotide-excision repair	P
GO:0006297	17	0.0663	1	0.000651	0.019	0.026	0.497	0.0655	1	0.121	1	0.00835	0.105	0.31	1	0.0846	1	nucleotide-excision repair, DNA gap filling	P
GO:0006298	30	2.1e-07	0.000125	1.98e-06	0.00141	0.00784	0.157	0.146	1	1.08e-05	0.0005	5.19e-08	0.000105	0.662	1	0.152	1	mismatch repair	P
GO:0006302	40	0.362	1	0.0117	0.384	0.606	1	0.0323	0.542	0.35	1	0.0276	1	0.264	1	0.105	1	double-strand break repair	P
GO:0006303	10	0.64	1	0.119	1	0.765	1	0.131	1	0.559	1	0.139	1	0.73	1	0.19	1	double-strand break repair via nonhomologous end joining	P
GO:0006304	30	0.617	1	0.171	1	0.354	1	0.114	1	0.473	1	0.207	1	0.964	1	0.676	1	DNA modification	P
GO:0006305	20	0.698	1	0.154	1	0.456	1	0.039	1	0.503	1	0.284	1	0.979	1	0.293	1	DNA alkylation	P
GO:0006306	20	0.698	1	0.154	1	0.456	1	0.039	1	0.503	1	0.284	1	0.979	1	0.293	1	DNA methylation	P
GO:0006308	23	0.0929	1	0.051	1	0.0395	0.587	0.0977	1	0.264	1	0.074	1	0.106	1	0.277	1	DNA catabolism	P
GO:0006309	15	0.345	1	0.214	1	0.423	1	0.265	1	0.472	1	0.365	1	0.21	1	0.19	1	DNA fragmentation during apoptosis	P
GO:0006310	111	0.22	1	0.000231	0.00826	0.365	1	0.00382	0.0684	0.0673	1	0.001	0.0102	0.993	1	0.058	1	DNA recombination	P
GO:0006323	335	0.0234	1	0.000104	0.004	0.000161	0.00457	0.000548	0.00717	0.0658	1	0.000375	0.0102	0.989	1	0.252	1	DNA packaging	P
GO:0006325	331	0.0183	0.562	8.95e-05	0.004	0.00014	0.00457	0.000789	0.0103	0.0556	1	0.000319	0.0102	0.985	1	0.209	1	establishment and/or maintenance of chromatin architecture	P
GO:0006333	158	0.201	1	0.278	1	0.217	1	0.329	1	0.157	1	0.168	1	0.956	1	0.987	1	chromatin assembly or disassembly	P
GO:0006334	104	0.424	1	0.664	1	0.562	1	0.587	1	0.297	1	0.508	1	0.97	1	0.998	1	nucleosome assembly	P
GO:0006338	56	0.00604	0.137	9.22e-05	0.004	0.015	0.192	0.00669	0.081	0.00901	0.202	0.000166	0.00229	0.715	1	0.117	1	chromatin remodeling	P
GO:0006342	14	0.06	1	0.0901	1	0.131	1	0.213	1	0.0547	1	0.0386	1	0.47	1	0.809	1	chromatin silencing	P
GO:0006350	2702	0.987	1	2.31e-05	0.00221	0.0269	0.497	6.41e-08	0	0.989	1	0.00118	0.0102	1	1	0.561	1	transcription	P
GO:0006351	2502	0.99	1	2.24e-05	0.00221	0.0296	0.565	2.99e-07	0	0.994	1	0.000873	0.0102	1	1	0.535	1	transcription, DNA-dependent	P
GO:0006352	100	0.00184	0.049	2.14e-06	0.00141	0.00106	0.0125	0.00985	0.123	0.0198	0.381	2e-06	0.00167	0.128	1	0.0768	1	transcription initiation	P
GO:0006354	52	0.00772	0.137	2.01e-05	0.00221	0.018	0.236	0.0139	0.281	0.047	1	0.000237	0.007	0.489	1	0.0054	0.066	RNA elongation	P
GO:0006355	2438	0.994	1	0.000115	0.004	0.0369	0.587	2.13e-07	0	0.996	1	0.00361	0.074	1	1	0.632	1	regulation of transcription, DNA-dependent	P
GO:0006357	542	1	1	0.98	1	0.577	1	0.773	1	0.999	1	0.993	1	1	1	0.903	1	regulation of transcription from RNA polymerase II promoter	P
GO:0006360	11	0.275	1	0.0853	1	0.0586	1	0.464	1	0.641	1	0.189	1	0.999	1	0.301	1	transcription from RNA polymerase I promoter	P
GO:0006364	68	0.0857	1	0.103	1	0.0217	0.263	0.0446	1	0.164	1	0.221	1	0.452	1	0.921	1	rRNA processing	P
GO:0006366	706	0.998	1	0.738	1	0.256	1	0.376	1	0.997	1	0.836	1	1	1	0.8	1	transcription from RNA polymerase II promoter	P
GO:0006367	70	0.000624	0.016	2.08e-05	0.00221	0.00141	0.016	0.0175	0.41	0.00993	0.202	2.14e-05	0.00229	0.178	1	0.0498	0.81	transcription initiation from RNA polymerase II promoter	P
GO:0006368	49	0.00954	0.177	3.07e-05	0.003	0.0193	0.236	0.0105	0.123	0.0667	1	0.000408	0.0102	0.428	1	0.0071	0.066	RNA elongation from RNA polymerase II promoter	P
GO:0006376	17	0.745	1	0.741	1	0.287	1	0.307	1	0.778	1	0.811	1	0.907	1	0.989	1	mRNA splice site selection	P
GO:0006383	28	0.0257	1	0.0035	0.063	0.015	0.192	0.629	1	0.131	1	0.00643	0.105	0.63	1	0.0634	1	transcription from RNA polymerase III promoter	P
GO:0006396	491	4.47e-06	0.0026	3.52e-13	0	5.25e-08	0	1.4e-08	0	0.00244	0.043	4.83e-09	0.000105	0.088	1	0.0139	0.138	RNA processing	P
GO:0006397	301	5.88e-05	0.005	5.61e-09	0.001	3.82e-05	0.00457	3.14e-07	0	0.00797	0.202	7.17e-07	0.000222	0.0705	1	0.0156	0.138	mRNA processing	P
GO:0006399	137	0.00835	0.156	0.000658	0.019	0.0452	0.868	0.0412	1	0.00345	0.0624	0.00389	0.074	0.466	1	0.0901	1	tRNA metabolism	P
GO:0006400	12	0.247	1	0.0744	1	0.318	1	0.514	1	0.109	1	0.0888	1	0.805	1	0.0919	1	tRNA modification	P
GO:0006401	48	0.19	1	0.0998	1	0.0205	0.236	0.00856	0.112	0.38	1	0.226	1	0.409	1	0.601	1	RNA catabolism	P
GO:0006402	31	0.192	1	0.0474	1	0.117	1	0.0095	0.112	0.367	1	0.0765	1	0.1	1	0.465	1	mRNA catabolism	P
GO:0006403	93	0.0115	0.272	1.55e-05	0.00221	0.000967	0.0125	4.36e-06	0.000832	0.0381	1	0.000116	0.00229	0.446	1	0.066	1	RNA localization	P
GO:0006405	36	0.14	1	0.0668	1	0.0217	0.263	0.0147	0.281	0.25	1	0.113	1	0.676	1	0.848	1	RNA export from nucleus	P
GO:0006406	28	0.205	1	0.197	1	0.00961	0.157	0.056	1	0.499	1	0.239	1	0.465	1	0.738	1	mRNA export from nucleus	P
GO:0006412	772	0.0174	0.562	0.00226	0.051	0.151	1	0.00214	0.027	0.0317	0.655	0.0113	0.212	0.414	1	0.268	1	protein biosynthesis	P
GO:0006413	67	0.0621	1	0.0112	0.384	0.0107	0.157	0.00353	0.056	0.385	1	0.0372	1	0.645	1	0.183	1	translational initiation	P
GO:0006414	107	0.749	1	0.044	1	0.723	1	0.408	1	0.831	1	0.0242	0.769	0.692	1	0.418	1	translational elongation	P
GO:0006415	10	0.0389	1	0.0811	1	0.091	1	0.175	1	0.0551	1	0.112	1	0.324	1	0.106	1	translational termination	P
GO:0006417	182	0.425	1	0.141	1	0.106	1	0.0698	1	0.569	1	0.123	1	0.933	1	0.877	1	regulation of protein biosynthesis	P
GO:0006418	75	0.00376	0.137	0.00398	0.063	0.0271	0.497	0.19	1	0.00546	0.135	0.00713	0.105	0.108	1	0.028	0.252	tRNA aminoacylation for protein translation	P
GO:0006445	60	0.277	1	0.0344	1	0.525	1	0.00415	0.0684	0.338	1	0.0682	1	0.556	1	0.238	1	regulation of translation	P
GO:0006446	44	0.275	1	0.0538	1	0.202	1	0.0126	0.157	0.365	1	0.0803	1	0.939	1	0.613	1	regulation of translational initiation	P
GO:0006457	195	0.00437	0.137	0.00183	0.039	0.0202	0.236	0.059	1	0.0458	1	0.00301	0.064	0.0878	1	0.256	1	protein folding	P
GO:0006461	397	0.612	1	0.0379	1	0.0615	1	0.0135	0.281	0.75	1	0.0515	1	0.894	1	0.782	1	protein complex assembly	P
GO:0006464	1868	0.0244	1	5.15e-05	0.004	3.38e-08	0	1.69e-11	0	0.244	1	0.0102	0.212	1	1	0.556	1	protein modification	P
GO:0006468	717	0.774	1	0.843	1	0.00574	0.093	0.127	1	0.831	1	0.785	1	1	1	1	1	protein amino acid phosphorylation	P
GO:0006469	62	0.991	1	0.971	1	0.477	1	0.635	1	0.98	1	0.967	1	1	1	0.986	1	negative regulation of protein kinase activity	P
GO:0006470	145	0.678	1	0.187	1	0.0336	0.587	0.026	0.41	0.921	1	0.513	1	0.948	1	0.248	1	protein amino acid dephosphorylation	P
GO:0006471	20	0.026	1	0.423	1	0.0867	1	0.367	1	0.0531	1	0.364	1	0.601	1	0.886	1	protein amino acid ADP-ribosylation	P
GO:0006473	23	0.134	1	0.04	1	0.0386	0.587	0.0343	0.542	0.168	1	0.0845	1	0.815	1	0.308	1	protein amino acid acetylation	P
GO:0006476	20	0.0309	1	0.297	1	0.0148	0.192	0.518	1	0.0691	1	0.163	1	0.526	1	0.976	1	protein amino acid deacetylation	P
GO:0006479	28	0.0783	1	0.0262	1	0.0568	1	0.00881	0.112	0.167	1	0.137	1	0.245	1	0.0155	0.138	protein amino acid methylation	P
GO:0006486	116	0.582	1	0.153	1	0.11	1	0.0614	1	0.748	1	0.193	1	0.855	1	0.816	1	protein amino acid glycosylation	P
GO:0006487	41	0.333	1	0.398	1	0.485	1	0.152	1	0.293	1	0.511	1	0.463	1	0.575	1	protein amino acid N-linked glycosylation	P
GO:0006493	23	0.617	1	0.573	1	0.18	1	0.51	1	0.948	1	0.561	1	0.555	1	0.938	1	protein amino acid O-linked glycosylation	P
GO:0006497	50	0.623	1	0.205	1	0.353	1	0.124	1	0.483	1	0.345	1	0.968	1	0.507	1	protein amino acid lipidation	P
GO:0006505	33	0.492	1	0.267	1	0.53	1	0.19	1	0.311	1	0.473	1	0.912	1	0.4	1	GPI anchor metabolism	P
GO:0006506	30	0.581	1	0.221	1	0.436	1	0.185	1	0.472	1	0.416	1	0.902	1	0.339	1	GPI anchor biosynthesis	P
GO:0006508	840	0.715	1	0.85	1	0.0279	0.497	0.00796	0.081	0.959	1	0.96	1	0.995	1	0.998	1	proteolysis	P
GO:0006509	12	0.71	1	0.66	1	0.115	1	0.796	1	0.848	1	0.598	1	1	1	0.964	1	membrane protein ectodomain proteolysis	P
GO:0006511	218	0.00496	0.137	1.11e-05	0.00141	0.0233	0.497	1.8e-08	0	0.0433	1	0.000872	0.0102	0.56	1	0.0498	0.81	ubiquitin-dependent protein catabolism	P
GO:0006512	579	0.000504	0.016	2.41e-09	0.001	0.000166	0.00457	2.46e-14	0	0.047	1	1.22e-05	0.00229	0.466	1	0.00458	0.066	ubiquitin cycle	P
GO:0006515	18	0.695	1	0.371	1	0.895	1	0.183	1	0.506	1	0.433	1	0.818	1	0.668	1	misfolded or incompletely synthesized protein catabolism	P
GO:0006516	17	0.18	1	0.342	1	0.116	1	0.515	1	0.234	1	0.28	1	0.36	1	0.498	1	glycoprotein catabolism	P
GO:0006518	25	0.381	1	0.838	1	0.989	1	0.956	1	0.148	1	0.644	1	1	1	0.991	1	peptide metabolism	P
GO:0006519	482	0.325	1	0.379	1	0.00222	0.018	0.297	1	0.552	1	0.276	1	0.99	1	0.948	1	amino acid and derivative metabolism	P
GO:0006520	399	0.357	1	0.39	1	0.0129	0.192	0.478	1	0.53	1	0.266	1	0.986	1	0.882	1	amino acid metabolism	P
GO:0006521	92	0.998	1	1	1	0.852	1	1	1	0.993	1	1	1	1	1	1	1	regulation of amino acid metabolism	P
GO:0006525	15	0.896	1	0.998	1	0.69	1	0.99	1	0.849	1	0.989	1	1	1	0.894	1	arginine metabolism	P
GO:0006536	13	0.159	1	0.914	1	0.141	1	0.695	1	0.144	1	0.935	1	0.871	1	0.984	1	glutamate metabolism	P
GO:0006541	18	0.19	1	0.29	1	0.112	1	0.391	1	0.346	1	0.227	1	0.335	1	0.785	1	glutamine metabolism	P
GO:0006544	13	0.251	1	0.287	1	0.521	1	0.276	1	0.455	1	0.261	1	0.214	1	0.596	1	glycine metabolism	P
GO:0006547	12	0.958	1	0.938	1	0.465	1	0.347	1	0.911	1	0.992	1	1	1	0.94	1	histidine metabolism	P
GO:0006555	10	0.383	1	0.756	1	0.129	1	0.332	1	0.676	1	0.852	1	0.415	1	0.957	1	methionine metabolism	P
GO:0006558	10	0.37	1	0.757	1	0.18	1	0.849	1	0.457	1	0.837	1	0.793	1	0.374	1	L-phenylalanine metabolism	P
GO:0006559	10	0.37	1	0.757	1	0.18	1	0.849	1	0.457	1	0.837	1	0.793	1	0.374	1	L-phenylalanine catabolism	P
GO:0006560	11	0.351	1	0.598	1	0.264	1	0.287	1	0.553	1	0.476	1	0.244	1	1	1	proline metabolism	P
GO:0006570	14	0.377	1	0.879	1	0.115	1	0.916	1	0.435	1	0.866	1	0.912	1	0.522	1	tyrosine metabolism	P
GO:0006575	146	0.629	1	0.426	1	0.0637	1	0.242	1	0.744	1	0.307	1	0.961	1	0.991	1	amino acid derivative metabolism	P
GO:0006576	77	0.741	1	0.825	1	0.349	1	0.432	1	0.695	1	0.726	1	0.918	1	0.986	1	biogenic amine metabolism	P
GO:0006582	10	0.304	1	0.851	1	0.124	1	0.453	1	0.404	1	0.815	1	0.672	1	0.991	1	melanin metabolism	P
GO:0006584	32	0.99	1	0.886	1	0.595	1	0.285	1	0.992	1	0.883	1	1	1	1	1	catecholamine metabolism	P
GO:0006586	11	0.13	1	0.159	1	0.453	1	0.592	1	0.0958	1	0.166	1	0.189	1	0.214	1	indolalkylamine metabolism	P
GO:0006595	15	0.15	1	0.118	1	0.131	1	0.52	1	0.141	1	0.0722	1	0.39	1	0.465	1	polyamine metabolism	P
GO:0006596	10	0.173	1	0.152	1	0.0891	1	0.819	1	0.228	1	0.0312	1	0.282	1	1	1	polyamine biosynthesis	P
GO:0006605	220	0.0173	0.562	0.000517	0.019	0.00391	0.035	2.96e-05	0.00391	0.0482	1	0.00558	0.074	0.395	1	0.143	1	protein targeting	P
GO:0006606	104	0.0896	1	0.0144	0.384	0.0562	1	0.00563	0.081	0.0969	1	0.024	0.769	0.526	1	0.491	1	protein import into nucleus	P
GO:0006607	14	0.12	1	0.155	1	0.0289	0.565	0.232	1	0.235	1	0.203	1	0.194	1	0.25	1	NLS-bearing substrate import into nucleus	P
GO:0006611	20	0.141	1	0.0368	1	0.102	1	0.0711	1	0.183	1	0.0829	1	0.535	1	0.143	1	protein export from nucleus	P
GO:0006612	30	0.44	1	0.123	1	0.372	1	0.044	1	0.534	1	0.281	1	0.82	1	0.217	1	protein targeting to membrane	P
GO:0006613	17	0.544	1	0.331	1	0.625	1	0.0642	1	0.547	1	0.597	1	0.897	1	0.497	1	cotranslational protein targeting to membrane	P
GO:0006614	11	0.915	1	0.371	1	0.969	1	0.194	1	0.854	1	0.527	1	0.913	1	0.407	1	SRP-dependent cotranslational protein targeting to membrane	P
GO:0006625	13	0.409	1	0.897	1	0.12	1	0.319	1	0.563	1	0.992	1	0.837	1	0.398	1	protein targeting to peroxisome	P
GO:0006626	20	0.324	1	0.309	1	0.415	1	0.0486	1	0.466	1	0.47	1	0.189	1	0.982	1	protein targeting to mitochondrion	P
GO:0006629	830	0.78	1	0.842	1	0.00809	0.157	0.0804	1	0.935	1	0.893	1	0.999	1	0.999	1	lipid metabolism	P
GO:0006631	191	0.233	1	0.234	1	0.0698	1	0.0579	1	0.289	1	0.258	1	0.796	1	0.978	1	fatty acid metabolism	P
GO:0006633	78	0.571	1	0.437	1	0.37	1	0.159	1	0.523	1	0.596	1	0.953	1	0.872	1	fatty acid biosynthesis	P
GO:0006635	22	0.0604	1	0.116	1	0.148	1	0.195	1	0.0848	1	0.151	1	0.199	1	0.268	1	fatty acid beta-oxidation	P
GO:0006637	11	0.121	1	0.0152	0.384	0.683	1	0.0694	1	0.11	1	0.0367	1	0.152	1	1	1	acyl-CoA metabolism	P
GO:0006638	37	0.779	1	0.945	1	0.49	1	0.915	1	0.683	1	0.941	1	0.989	1	0.815	1	neutral lipid metabolism	P
GO:0006639	37	0.779	1	0.945	1	0.49	1	0.915	1	0.683	1	0.941	1	0.989	1	0.815	1	acylglycerol metabolism	P
GO:0006641	32	0.75	1	0.893	1	0.421	1	0.871	1	0.662	1	0.869	1	0.997	1	0.856	1	triacylglycerol metabolism	P
GO:0006643	239	0.577	1	0.255	1	0.033	0.587	0.0514	1	0.632	1	0.415	1	0.995	1	0.909	1	membrane lipid metabolism	P
GO:0006644	180	0.677	1	0.485	1	0.173	1	0.105	1	0.688	1	0.732	1	0.991	1	0.907	1	phospholipid metabolism	P
GO:0006650	93	0.235	1	0.101	1	0.189	1	0.0557	1	0.204	1	0.274	1	0.735	1	0.386	1	glycerophospholipid metabolism	P
GO:0006656	10	0.507	1	0.319	1	0.918	1	0.204	1	0.352	1	0.339	1	0.992	1	0.977	1	phosphatidylcholine biosynthesis	P
GO:0006662	39	0.784	1	0.87	1	0.532	1	0.859	1	0.678	1	0.83	1	0.983	1	0.871	1	glycerol ether metabolism	P
GO:0006664	27	0.57	1	0.07	1	0.214	1	0.213	1	0.358	1	0.0394	1	1	1	0.684	1	glycolipid metabolism	P
GO:0006665	65	0.172	1	0.0237	1	0.00249	0.018	0.0391	1	0.306	1	0.0279	1	0.941	1	0.413	1	sphingolipid metabolism	P
GO:0006672	33	0.0723	1	0.0194	0.924	0.000603	0.0125	0.0292	0.542	0.119	1	0.0304	1	0.965	1	0.0897	1	ceramide metabolism	P
GO:0006684	11	0.36	1	0.0912	1	0.0545	1	0.0216	0.41	0.548	1	0.217	1	0.89	1	0.614	1	sphingomyelin metabolism	P
GO:0006687	18	0.471	1	0.13	1	0.168	1	0.276	1	0.323	1	0.1	1	1	1	0.48	1	glycosphingolipid metabolism	P
GO:0006690	42	0.875	1	0.467	1	0.948	1	0.819	1	0.701	1	0.267	1	0.934	1	0.647	1	icosanoid metabolism	P
GO:0006691	23	0.821	1	0.573	1	0.841	1	0.842	1	0.764	1	0.502	1	0.653	1	0.484	1	leukotriene metabolism	P
GO:0006692	17	0.682	1	0.329	1	0.778	1	0.577	1	0.509	1	0.137	1	0.846	1	0.833	1	prostanoid metabolism	P
GO:0006693	17	0.682	1	0.329	1	0.778	1	0.577	1	0.509	1	0.137	1	0.846	1	0.833	1	prostaglandin metabolism	P
GO:0006694	101	0.995	1	0.975	1	0.422	1	0.18	1	0.999	1	0.998	1	1	1	0.832	1	steroid biosynthesis	P
GO:0006695	27	0.212	1	0.0918	1	0.172	1	0.0761	1	0.312	1	0.22	1	0.464	1	0.553	1	cholesterol biosynthesis	P
GO:0006700	14	0.999	1	0.999	1	0.922	1	0.721	1	0.995	1	0.999	1	1	1	0.933	1	C21-steroid hormone biosynthesis	P
GO:0006706	18	0.129	1	0.094	1	0.0542	1	0.287	1	0.261	1	0.0949	1	0.509	1	0.545	1	steroid catabolism	P
GO:0006707	10	0.174	1	0.291	1	0.0752	1	0.819	1	0.479	1	0.276	1	0.909	1	0.381	1	cholesterol catabolism	P
GO:0006720	30	0.178	1	0.98	1	0.121	1	0.538	1	0.155	1	0.991	1	0.866	1	0.776	1	isoprenoid metabolism	P
GO:0006725	171	0.708	1	0.25	1	0.0432	0.724	0.106	1	0.912	1	0.223	1	0.976	1	0.98	1	aromatic compound metabolism	P
GO:0006730	111	0.2	1	0.0129	0.384	0.0558	1	0.00157	0.018	0.163	1	0.0526	1	0.95	1	0.14	1	one-carbon compound metabolism	P
GO:0006732	173	0.00124	0.0376	0.000538	0.019	0.000147	0.00457	0.0102	0.123	0.0277	0.655	0.0019	0.051	0.271	1	0.203	1	coenzyme metabolism	P
GO:0006733	40	0.00445	0.137	0.0104	0.384	0.00323	0.035	0.0164	0.41	0.0178	0.381	0.0171	0.565	0.201	1	0.079	1	oxidoreduction coenzyme metabolism	P
GO:0006739	14	0.166	1	0.339	1	0.0588	1	0.2	1	0.349	1	0.514	1	0.22	1	0.242	1	NADP metabolism	P
GO:0006740	10	0.0525	1	0.0691	1	0.0223	0.263	0.0499	1	0.155	1	0.232	1	0.154	1	0.0588	1	NADPH regeneration	P
GO:0006749	28	0.125	1	0.202	1	0.0903	1	0.144	1	0.214	1	0.371	1	0.314	1	0.57	1	glutathione metabolism	P
GO:0006750	10	0.0399	1	0.481	1	0.0339	0.587	0.43	1	0.0528	1	0.673	1	0.411	1	0.171	1	glutathione biosynthesis	P
GO:0006752	61	0.147	1	0.168	1	0.0288	0.565	0.384	1	0.44	1	0.116	1	0.479	1	0.628	1	group transfer coenzyme metabolism	P
GO:0006753	27	0.0224	1	0.231	1	0.0347	0.587	0.382	1	0.0934	1	0.189	1	0.303	1	0.573	1	nucleoside phosphate metabolism	P
GO:0006754	27	0.0224	1	0.231	1	0.0347	0.587	0.382	1	0.0934	1	0.189	1	0.303	1	0.573	1	ATP biosynthesis	P
GO:0006760	18	0.86	1	0.0978	1	0.27	1	0.281	1	0.988	1	0.0749	1	0.904	1	0.279	1	folic acid and derivative metabolism	P
GO:0006766	84	0.457	1	0.23	1	0.0972	1	0.233	1	0.553	1	0.317	1	0.857	1	0.471	1	vitamin metabolism	P
GO:0006767	57	0.0736	1	0.0584	1	0.00865	0.157	0.0247	0.41	0.155	1	0.152	1	0.505	1	0.289	1	water-soluble vitamin metabolism	P
GO:0006769	28	0.0599	1	0.11	1	0.0239	0.497	0.136	1	0.118	1	0.134	1	0.169	1	0.128	1	nicotinamide metabolism	P
GO:0006775	24	0.997	1	0.748	1	0.992	1	0.973	1	0.985	1	0.585	1	0.993	1	0.641	1	fat-soluble vitamin metabolism	P
GO:0006776	19	0.981	1	0.935	1	0.956	1	1	1	0.961	1	0.806	1	0.99	1	0.609	1	vitamin A metabolism	P
GO:0006778	28	0.429	1	0.256	1	0.0764	1	0.685	1	0.662	1	0.203	1	0.88	1	0.433	1	porphyrin metabolism	P
GO:0006779	22	0.657	1	0.391	1	0.247	1	0.762	1	0.71	1	0.323	1	0.924	1	0.402	1	porphyrin biosynthesis	P
GO:0006783	15	0.559	1	0.387	1	0.359	1	0.659	1	0.452	1	0.332	1	0.798	1	0.483	1	heme biosynthesis	P
GO:0006790	88	0.438	1	0.261	1	0.0907	1	0.0593	1	0.604	1	0.357	1	0.844	1	0.915	1	sulfur metabolism	P
GO:0006793	1025	0.295	1	0.263	1	4.01e-05	0.00457	0.00318	0.056	0.62	1	0.416	1	0.999	1	0.97	1	phosphorus metabolism	P
GO:0006796	1025	0.295	1	0.263	1	4.01e-05	0.00457	0.00318	0.056	0.62	1	0.416	1	0.999	1	0.97	1	phosphate metabolism	P
GO:0006800	161	0.849	1	0.936	1	0.0937	1	0.711	1	0.941	1	0.953	1	0.948	1	0.805	1	oxygen and reactive oxygen species metabolism	P
GO:0006801	23	0.974	1	0.792	1	0.994	1	0.48	1	0.989	1	0.791	1	0.459	1	0.781	1	superoxide metabolism	P
GO:0006805	30	0.901	1	0.865	1	0.482	1	0.773	1	0.987	1	0.716	1	0.491	1	1	1	xenobiotic metabolism	P
GO:0006807	601	0.183	1	0.448	1	0.00125	0.0125	0.233	1	0.312	1	0.35	1	0.979	1	0.966	1	nitrogen compound metabolism	P
GO:0006809	28	0.333	1	0.467	1	0.322	1	0.383	1	0.195	1	0.616	1	0.984	1	0.256	1	nitric oxide biosynthesis	P
GO:0006810	2992	0.612	1	0.728	1	9.02e-06	0.000971	0.000546	0.00717	0.895	1	0.859	1	0.996	1	1	1	transport	P
GO:0006811	970	1	1	1	1	0.916	1	0.997	1	1	1	1	1	1	1	1	1	ion transport	P
GO:0006812	674	1	1	0.999	1	0.638	1	0.802	1	1	1	0.997	1	1	1	1	1	cation transport	P
GO:0006813	283	1	1	1	1	0.977	1	0.989	1	1	1	1	1	0.999	1	1	1	potassium ion transport	P
GO:0006814	140	0.999	1	1	1	0.639	1	0.976	1	0.999	1	1	1	1	1	0.999	1	sodium ion transport	P
GO:0006816	165	0.995	1	0.995	1	0.573	1	0.788	1	0.98	1	0.995	1	1	1	0.995	1	calcium ion transport	P
GO:0006817	98	1	1	1	1	1	1	1	1	1	1	1	1	1	1	1	1	phosphate transport	P
GO:0006818	75	0.0292	1	0.16	1	0.00751	0.157	0.0556	1	0.123	1	0.208	1	0.678	1	0.848	1	hydrogen transport	P
GO:0006820	231	1	1	1	1	0.999	1	0.998	1	1	1	1	1	0.997	1	1	1	anion transport	P
GO:0006821	79	1	1	1	1	0.892	1	0.959	1	1	1	0.997	1	0.999	1	1	1	chloride transport	P
GO:0006825	15	0.888	1	0.931	1	0.758	1	0.482	1	0.981	1	0.926	1	0.531	1	0.992	1	copper ion transport	P
GO:0006826	30	0.366	1	0.346	1	0.194	1	0.401	1	0.449	1	0.27	1	0.435	1	0.589	1	iron ion transport	P
GO:0006829	26	0.813	1	0.252	1	0.906	1	0.6	1	0.579	1	0.139	1	1	1	0.904	1	zinc ion transport	P
GO:0006833	11	0.992	1	0.842	1	0.993	1	0.959	1	0.895	1	0.571	1	1	1	0.996	1	water transport	P
GO:0006835	59	0.994	1	0.856	1	0.871	1	0.352	1	0.997	1	0.782	1	0.774	1	1	1	dicarboxylic acid transport	P
GO:0006836	55	1	1	1	1	0.979	1	1	1	1	1	1	1	1	1	1	1	neurotransmitter transport	P
GO:0006839	58	0.0538	1	0.182	1	0.0252	0.497	0.0201	0.41	0.273	1	0.312	1	0.072	1	0.799	1	mitochondrial transport	P
GO:0006857	13	0.973	1	0.992	1	0.717	1	0.885	1	0.964	1	0.998	1	0.999	1	0.728	1	oligopeptide transport	P
GO:0006865	74	0.715	1	0.58	1	0.384	1	0.486	1	0.637	1	0.395	1	0.999	1	0.999	1	amino acid transport	P
GO:0006869	114	0.297	1	0.399	1	0.00364	0.035	0.503	1	0.457	1	0.415	1	0.99	1	0.49	1	lipid transport	P
GO:0006873	200	0.679	1	0.998	1	0.0341	0.587	0.98	1	0.878	1	0.984	1	0.963	1	0.994	1	cell ion homeostasis	P
GO:0006874	125	0.858	1	0.991	1	0.188	1	0.825	1	0.906	1	0.98	1	0.984	1	0.983	1	calcium ion homeostasis	P
GO:0006875	175	0.766	1	0.994	1	0.0408	0.587	0.954	1	0.925	1	0.977	1	0.972	1	0.988	1	metal ion homeostasis	P
GO:0006878	10	0.99	1	0.938	1	0.21	1	0.982	1	1	1	0.841	1	1	1	0.998	1	copper ion homeostasis	P
GO:0006879	29	0.209	1	0.411	1	0.0803	1	0.87	1	0.436	1	0.373	1	0.163	1	0.338	1	iron ion homeostasis	P
GO:0006884	11	0.661	1	0.197	1	0.28	1	0.24	1	0.891	1	0.134	1	0.534	1	1	1	regulation of cell volume	P
GO:0006885	35	0.393	1	0.508	1	0.565	1	0.476	1	0.287	1	0.308	1	0.795	1	0.969	1	regulation of pH	P
GO:0006886	520	0.000722	0.016	6.21e-06	0.00141	1.97e-06	0.000848	0.000128	0.007	0.00351	0.0624	0.00104	0.0102	0.924	1	0.181	1	intracellular protein transport	P
GO:0006887	97	0.145	1	0.832	1	0.168	1	0.268	1	0.162	1	0.976	1	0.401	1	0.783	1	exocytosis	P
GO:0006888	36	0.604	1	0.0625	1	0.124	1	0.0187	0.41	0.911	1	0.138	1	0.394	1	0.117	1	ER to Golgi vesicle-mediated transport	P
GO:0006890	18	0.419	1	0.169	1	0.443	1	0.197	1	0.442	1	0.141	1	0.402	1	0.549	1	retrograde vesicle-mediated transport, Golgi to ER	P
GO:0006891	17	0.095	1	0.117	1	0.117	1	0.0369	1	0.176	1	0.317	1	0.256	1	0.12	1	intra-Golgi vesicle-mediated transport	P
GO:0006892	23	0.27	1	0.344	1	0.0572	1	0.169	1	0.437	1	0.383	1	0.483	1	0.687	1	post-Golgi vesicle-mediated transport	P
GO:0006895	10	0.102	1	0.217	1	0.0072	0.157	0.122	1	0.276	1	0.257	1	0.748	1	0.638	1	Golgi to endosome transport	P
GO:0006897	215	0.115	1	0.0354	1	0.16	1	0.004	0.0684	0.0465	1	0.148	1	0.999	1	0.196	1	endocytosis	P
GO:0006898	51	0.636	1	0.403	1	0.665	1	0.32	1	0.538	1	0.321	1	0.749	1	0.92	1	receptor mediated endocytosis	P
GO:0006900	12	0.00509	0.137	0.0244	1	0.0331	0.587	0.146	1	0.0116	0.301	0.0158	0.565	0.0392	0.962	0.271	1	vesicle budding	P
GO:0006901	10	0.039	1	0.0828	1	0.117	1	0.257	1	0.0701	1	0.0668	1	0.0508	1	0.214	1	vesicle coating	P
GO:0006903	21	0.00957	0.177	0.0163	0.384	0.00585	0.093	0.0795	1	0.019	0.381	0.00848	0.105	0.0341	0.962	0.115	1	vesicle targeting	P
GO:0006904	20	0.222	1	0.396	1	0.0921	1	0.304	1	0.23	1	0.317	1	0.865	1	0.757	1	vesicle docking during exocytosis	P
GO:0006909	46	0.608	1	0.948	1	0.881	1	0.936	1	0.479	1	0.982	1	0.976	1	0.204	1	phagocytosis	P
GO:0006913	273	0.0222	1	0.0034	0.063	0.000571	0.0125	0.0125	0.157	0.0301	0.655	0.0372	1	0.979	1	0.247	1	nucleocytoplasmic transport	P
GO:0006914	28	0.297	1	0.0385	1	0.51	1	0.139	1	0.246	1	0.0731	1	0.622	1	0.255	1	autophagy	P
GO:0006915	859	0.969	1	0.855	1	0.0129	0.192	0.254	1	0.999	1	0.911	1	0.999	1	0.982	1	apoptosis	P
GO:0006916	173	0.986	1	0.945	1	0.38	1	0.763	1	0.999	1	0.966	1	0.975	1	0.898	1	anti-apoptosis	P
GO:0006917	243	0.582	1	0.079	1	0.025	0.497	0.0136	0.281	0.923	1	0.219	1	0.712	1	0.812	1	induction of apoptosis	P
GO:0006919	45	0.11	1	0.125	1	0.461	1	0.0536	1	0.0906	1	0.156	1	0.296	1	0.459	1	caspase activation	P
GO:0006921	20	0.492	1	0.427	1	0.818	1	0.513	1	0.62	1	0.445	1	0.188	1	0.557	1	disassembly of cell structures during apoptosis	P
GO:0006928	497	1	1	1	1	1	1	0.998	1	1	1	1	1	1	1	1	1	cell motility	P
GO:0006929	12	0.989	1	0.949	1	0.997	1	0.991	1	0.995	1	0.768	1	0.792	1	1	1	substrate-bound cell migration	P
GO:0006935	195	1	1	1	1	0.979	1	0.607	1	0.999	1	1	1	1	1	1	1	chemotaxis	P
GO:0006936	148	0.771	1	1	1	0.486	1	0.999	1	0.784	1	1	1	0.869	1	1	1	muscle contraction	P
GO:0006937	41	0.771	1	1	1	0.263	1	0.999	1	0.92	1	1	1	0.823	1	1	1	regulation of muscle contraction	P
GO:0006939	31	0.953	1	1	1	0.695	1	0.951	1	0.956	1	0.996	1	0.984	1	1	1	smooth muscle contraction	P
GO:0006940	19	0.817	1	1	1	0.391	1	0.999	1	0.926	1	0.997	1	0.875	1	1	1	regulation of smooth muscle contraction	P
GO:0006941	39	0.368	1	1	1	0.145	1	0.991	1	0.47	1	0.999	1	0.997	1	1	1	striated muscle contraction	P
GO:0006942	11	0.598	1	1	1	0.232	1	1	1	0.712	1	0.999	1	1	1	0.998	1	regulation of striated muscle contraction	P
GO:0006944	42	0.339	1	0.533	1	0.186	1	0.15	1	0.35	1	0.763	1	0.924	1	0.664	1	membrane fusion	P
GO:0006950	1455	1	1	1	1	0.284	1	0.963	1	1	1	1	1	1	1	1	1	response to stress	P
GO:0006952	718	1	1	1	1	1	1	1	1	1	1	1	1	1	1	1	1	defense response	P
GO:0006953	30	0.867	1	1	1	0.718	1	1	1	0.676	1	1	1	0.986	1	1	1	acute-phase response	P
GO:0006954	381	1	1	1	1	0.99	1	1	1	1	1	1	1	1	1	1	1	inflammatory response	P
GO:0006955	805	1	1	1	1	1	1	1	1	1	1	1	1	1	1	1	1	immune response	P
GO:0006956	42	1	1	1	1	1	1	1	1	1	1	1	1	1	1	1	1	complement activation	P
GO:0006957	17	1	1	0.998	1	1	1	1	1	1	1	0.952	1	1	1	1	1	complement activation, alternative pathway	P
GO:0006958	29	0.999	1	0.997	1	0.995	1	0.986	1	0.997	1	0.989	1	0.997	1	1	1	complement activation, classical pathway	P
GO:0006959	84	0.998	1	1	1	0.986	1	1	1	0.967	1	1	1	1	1	1	1	humoral immune response	P
GO:0006968	65	0.99	1	0.976	1	0.719	1	0.777	1	0.986	1	0.865	1	0.999	1	1	1	cellular defense response	P
GO:0006970	13	0.215	1	0.484	1	0.115	1	0.368	1	0.196	1	0.315	1	0.913	1	0.966	1	response to osmotic stress	P
GO:0006974	369	0.00227	0.049	6.47e-08	0.001	3.76e-05	0.00457	6.75e-07	0	0.0117	0.301	8.2e-06	0.00229	0.986	1	0.0294	0.252	response to DNA damage stimulus	P
GO:0006979	125	0.619	1	0.754	1	0.06	1	0.78	1	0.801	1	0.718	1	0.903	1	0.578	1	response to oxidative stress	P
GO:0006984	26	0.667	1	0.611	1	0.894	1	0.233	1	0.461	1	0.558	1	0.979	1	0.988	1	ER-nuclear signaling pathway	P
GO:0006986	82	0.917	1	0.548	1	0.472	1	0.722	1	0.976	1	0.409	1	0.886	1	0.7	1	response to unfolded protein	P
GO:0006996	1158	0.00168	0.049	0.000382	0.011	5.47e-11	0	8.36e-06	0.000832	0.0506	1	0.00485	0.074	0.975	1	0.574	1	organelle organization and biogenesis	P
GO:0006997	13	0.687	1	0.102	1	0.501	1	0.0452	1	0.547	1	0.103	1	1	1	0.88	1	nuclear organization and biogenesis	P
GO:0007001	359	0.0143	0.272	3.77e-05	0.003	0.000113	0.00457	0.000339	0.007	0.043	1	0.000313	0.0102	0.988	1	0.102	1	chromosome organization and biogenesis (sensu Eukaryota)	P
GO:0007004	13	0.984	1	0.42	1	0.864	1	0.364	1	0.982	1	0.509	1	0.984	1	0.411	1	telomere maintenance via telomerase	P
GO:0007005	43	0.261	1	0.425	1	0.243	1	0.232	1	0.482	1	0.434	1	0.34	1	0.986	1	mitochondrion organization and biogenesis	P
GO:0007006	21	0.308	1	0.408	1	0.862	1	0.515	1	0.424	1	0.339	1	0.14	1	0.818	1	mitochondrial membrane organization and biogenesis	P
GO:0007009	19	1	1	0.951	1	1	1	0.962	1	1	1	0.747	1	1	1	1	1	plasma membrane organization and biogenesis	P
GO:0007010	540	0.401	1	0.689	1	5.87e-05	0.00457	0.127	1	0.784	1	0.808	1	0.967	1	0.811	1	cytoskeleton organization and biogenesis	P
GO:0007015	50	0.896	1	0.53	1	0.452	1	0.375	1	0.926	1	0.648	1	0.874	1	0.417	1	actin filament organization	P
GO:0007017	228	0.438	1	0.253	1	0.00237	0.018	0.0528	1	0.794	1	0.402	1	0.832	1	0.526	1	microtubule-based process	P
GO:0007018	115	0.36	1	0.419	1	0.00476	0.093	0.0508	1	0.737	1	0.669	1	0.721	1	0.565	1	microtubule-based movement	P
GO:0007019	17	0.466	1	0.143	1	0.261	1	0.18	1	0.479	1	0.123	1	0.847	1	0.571	1	microtubule depolymerization	P
GO:0007026	16	0.31	1	0.166	1	0.168	1	0.334	1	0.335	1	0.121	1	0.78	1	0.491	1	negative regulation of microtubule depolymerization	P
GO:0007028	128	0.0808	1	0.0238	1	0.00861	0.157	0.0283	0.542	0.188	1	0.0547	1	0.618	1	0.735	1	cytoplasm organization and biogenesis	P
GO:0007030	13	0.471	1	0.179	1	0.033	0.587	0.0113	0.127	0.862	1	0.528	1	0.64	1	0.35	1	Golgi organization and biogenesis	P
GO:0007031	22	0.082	1	0.628	1	0.131	1	0.188	1	0.148	1	0.72	1	0.494	1	0.738	1	peroxisome organization and biogenesis	P
GO:0007033	34	0.221	1	0.264	1	0.0147	0.192	0.216	1	0.251	1	0.156	1	1	1	0.928	1	vacuole organization and biogenesis	P
GO:0007034	22	0.156	1	0.106	1	0.0483	0.868	0.0319	0.542	0.229	1	0.17	1	0.719	1	0.402	1	vacuolar transport	P
GO:0007040	32	0.142	1	0.176	1	0.00674	0.157	0.222	1	0.181	1	0.0918	1	1	1	0.894	1	lysosome organization and biogenesis	P
GO:0007041	14	0.095	1	0.307	1	0.0485	0.868	0.102	1	0.123	1	0.294	1	0.793	1	0.802	1	lysosomal transport	P
GO:0007043	14	0.744	1	0.459	1	0.779	1	0.596	1	0.675	1	0.604	1	0.643	1	0.132	1	intercellular junction assembly	P
GO:0007046	68	0.0857	1	0.103	1	0.0217	0.263	0.0446	1	0.164	1	0.221	1	0.452	1	0.921	1	ribosome biogenesis	P
GO:0007049	844	0.0145	0.272	5.96e-07	0.001	2.8e-05	0.001	8.39e-09	0	0.0814	1	0.000448	0.0102	0.951	1	0.0255	0.252	cell cycle	P
GO:0007050	91	0.486	1	0.926	1	0.0807	1	0.341	1	0.638	1	0.972	1	0.722	1	0.769	1	cell cycle arrest	P
GO:0007051	30	0.0595	1	0.00226	0.051	0.0469	0.868	0.0266	0.41	0.0504	1	0.0112	0.212	0.838	1	0.109	1	spindle organization and biogenesis	P
GO:0007052	12	0.119	1	0.000298	0.00826	0.202	1	0.0237	0.41	0.107	1	0.00208	0.051	0.246	1	0.212	1	mitotic spindle organization and biogenesis	P
GO:0007059	65	0.0717	1	0.00595	0.15	0.0518	1	0.0683	1	0.298	1	0.00728	0.105	0.0931	1	0.292	1	chromosome segregation	P
GO:0007062	10	0.645	1	0.135	1	0.866	1	0.383	1	0.738	1	0.0813	1	0.295	1	0.949	1	sister chromatid cohesion	P
GO:0007067	218	0.00415	0.137	2.08e-07	0.001	0.000687	0.0125	3.23e-06	0	0.0526	1	9.73e-06	0.00229	0.401	1	0.00543	0.066	mitosis	P
GO:0007076	15	0.213	1	0.206	1	0.308	1	0.0929	1	0.436	1	0.484	1	0.0696	1	0.186	1	mitotic chromosome condensation	P
GO:0007088	67	0.207	1	0.0609	1	0.0528	1	0.258	1	0.286	1	0.0514	1	0.783	1	0.363	1	regulation of mitosis	P
GO:0007091	10	0.045	1	0.03	1	0.275	1	0.141	1	0.00369	0.0624	0.0271	1	0.327	1	0.447	1	mitotic metaphase/anaphase transition	P
GO:0007093	20	0.476	1	0.187	1	0.0258	0.497	0.095	1	0.821	1	0.205	1	0.655	1	0.423	1	mitotic checkpoint	P
GO:0007096	11	0.0089	0.156	0.00228	0.051	0.0127	0.192	0.0222	0.41	0.0333	0.655	0.00562	0.074	0.296	1	0.0695	1	regulation of exit from mitosis	P
GO:0007098	13	0.11	1	0.0354	1	0.0396	0.587	0.0523	1	0.201	1	0.0915	1	0.508	1	0.043	0.81	centrosome cycle	P
GO:0007126	86	0.383	1	0.00272	0.051	0.487	1	0.0503	1	0.43	1	0.00942	0.143	0.433	1	0.0399	0.81	meiosis	P
GO:0007127	38	0.163	1	0.00583	0.15	0.78	1	0.0826	1	0.0871	1	0.00714	0.105	0.308	1	0.215	1	meiosis I	P
GO:0007131	21	0.431	1	0.00962	0.384	0.861	1	0.0258	0.41	0.27	1	0.0146	0.565	0.722	1	0.265	1	meiotic recombination	P
GO:0007154	3884	1	1	1	1	0.975	1	0.998	1	1	1	1	1	1	1	1	1	cell communication	P
GO:0007155	825	1	1	1	1	0.82	1	1	1	1	1	1	1	1	1	1	1	cell adhesion	P
GO:0007156	100	1	1	1	1	1	1	1	1	1	1	1	1	1	1	1	1	homophilic cell adhesion	P
GO:0007157	46	0.997	1	0.995	1	0.846	1	0.929	1	0.999	1	0.997	1	1	1	0.994	1	heterophilic cell adhesion	P
GO:0007159	26	0.852	1	0.837	1	0.422	1	0.625	1	0.913	1	0.858	1	0.957	1	0.728	1	leukocyte adhesion	P
GO:0007160	117	0.816	1	0.891	1	0.266	1	0.686	1	0.747	1	0.823	1	0.999	1	0.975	1	cell-matrix adhesion	P
GO:0007162	19	0.417	1	0.984	1	0.318	1	0.641	1	0.458	1	0.979	1	0.424	1	0.999	1	negative regulation of cell adhesion	P
GO:0007163	37	0.849	1	0.702	1	0.419	1	0.21	1	0.872	1	0.894	1	0.861	1	0.321	1	establishment and/or maintenance of cell polarity	P
GO:0007165	3501	1	1	1	1	0.966	1	0.999	1	1	1	1	1	1	1	1	1	signal transduction	P
GO:0007166	1730	1	1	1	1	1	1	0.999	1	1	1	1	1	1	1	1	1	cell surface receptor linked signal transduction	P
GO:0007167	349	1	1	1	1	0.976	1	0.986	1	1	1	1	1	1	1	1	1	enzyme linked receptor protein signaling pathway	P
GO:0007169	230	1	1	1	1	0.99	1	0.952	1	0.999	1	1	1	1	1	1	1	transmembrane receptor protein tyrosine kinase signaling pathway	P
GO:0007172	16	0.768	1	0.633	1	0.503	1	0.0616	1	0.714	1	0.798	1	1	1	0.997	1	signal complex formation	P
GO:0007173	34	0.198	1	0.503	1	0.333	1	0.217	1	0.173	1	0.715	1	0.467	1	0.362	1	epidermal growth factor receptor signaling pathway	P
GO:0007178	107	0.998	1	0.997	1	0.615	1	0.874	1	0.996	1	0.999	1	1	1	0.985	1	transmembrane receptor protein serine/threonine kinase signaling pathway	P
GO:0007179	64	0.893	1	0.87	1	0.304	1	0.832	1	0.889	1	0.874	1	1	1	0.73	1	transforming growth factor beta receptor signaling pathway	P
GO:0007186	1021	1	1	1	1	1	1	0.987	1	1	1	1	1	1	1	1	1	G-protein coupled receptor protein signaling pathway	P
GO:0007187	119	1	1	1	1	0.998	1	0.838	1	1	1	1	1	1	1	1	1	G-protein signaling, coupled to cyclic nucleotide second messenger	P
GO:0007188	93	1	1	1	1	1	1	0.84	1	1	1	1	1	1	1	1	1	G-protein signaling, coupled to cAMP nucleotide second messenger	P
GO:0007189	41	1	1	0.999	1	1	1	0.461	1	1	1	1	1	0.977	1	0.998	1	G-protein signaling, adenylate cyclase activating pathway	P
GO:0007190	23	0.95	1	0.858	1	0.916	1	0.294	1	0.941	1	0.986	1	0.633	1	0.951	1	adenylate cyclase activation	P
GO:0007193	21	0.963	1	0.997	1	0.858	1	0.89	1	0.938	1	1	1	0.993	1	0.992	1	G-protein signaling, adenylate cyclase inhibiting pathway	P
GO:0007194	17	1	1	1	1	1	1	1	1	1	1	0.972	1	1	1	1	1	negative regulation of adenylate cyclase activity	P
GO:0007200	76	1	1	0.999	1	0.995	1	0.86	1	0.999	1	0.998	1	0.999	1	1	1	G-protein signaling, coupled to IP3 second messenger (phospholipase C activating)	P
GO:0007202	15	0.513	1	0.37	1	0.422	1	0.169	1	0.461	1	0.388	1	0.706	1	0.952	1	phospholipase C activation	P
GO:0007204	72	0.643	1	0.974	1	0.509	1	0.683	1	0.573	1	0.927	1	0.899	1	1	1	elevation of cytosolic calcium ion concentration	P
GO:0007205	28	0.944	1	0.967	1	0.947	1	0.626	1	0.936	1	0.954	1	0.696	1	0.997	1	protein kinase C activation	P
GO:0007212	10	0.727	1	1	1	0.448	1	1	1	0.698	1	1	1	0.965	1	0.988	1	dopamine receptor signaling pathway	P
GO:0007214	32	1	1	1	1	0.941	1	1	1	1	1	1	1	1	1	0.998	1	gamma-aminobutyric acid signaling pathway	P
GO:0007215	22	0.96	1	0.938	1	0.524	1	0.948	1	0.989	1	0.926	1	0.988	1	0.682	1	glutamate signaling pathway	P
GO:0007218	93	1	1	1	1	0.955	1	0.997	1	1	1	0.993	1	1	1	1	1	neuropeptide signaling pathway	P
GO:0007219	53	0.998	1	0.991	1	0.737	1	0.806	1	1	1	0.996	1	0.973	1	0.998	1	Notch signaling pathway	P
GO:0007223	21	0.898	1	0.992	1	0.735	1	0.678	1	0.935	1	1	1	0.748	1	0.862	1	frizzled-2 signaling pathway	P
GO:0007224	25	0.681	1	0.989	1	0.436	1	0.959	1	0.764	1	0.996	1	0.666	1	0.607	1	smoothened signaling pathway	P
GO:0007229	62	0.163	1	0.946	1	0.0595	1	0.315	1	0.173	1	0.985	1	0.774	1	0.993	1	integrin-mediated signaling pathway	P
GO:0007242	1422	0.999	1	0.982	1	0.093	1	0.0586	1	1	1	0.995	1	1	1	1	1	intracellular signaling cascade	P
GO:0007243	445	0.985	1	0.839	1	0.317	1	0.515	1	0.982	1	0.63	1	1	1	1	1	protein kinase cascade	P
GO:0007249	148	0.618	1	0.0761	1	0.0394	0.587	0.224	1	0.726	1	0.0411	1	0.995	1	0.794	1	I-kappaB kinase/NF-kappaB cascade	P
GO:0007250	12	0.504	1	0.677	1	0.246	1	0.763	1	0.814	1	0.549	1	0.25	1	0.618	1	activation of NF-kappaB-inducing kinase	P
GO:0007254	80	0.946	1	0.963	1	0.788	1	0.889	1	0.935	1	0.962	1	0.969	1	0.822	1	JNK cascade	P
GO:0007257	24	0.893	1	0.763	1	0.943	1	0.366	1	0.82	1	0.822	1	0.968	1	0.905	1	activation of JNK activity	P
GO:0007259	54	0.819	1	0.895	1	0.225	1	0.936	1	0.875	1	0.692	1	0.973	1	0.999	1	JAK-STAT cascade	P
GO:0007260	25	0.989	1	0.844	1	0.36	1	0.821	1	0.999	1	0.634	1	1	1	1	1	tyrosine phosphorylation of STAT protein	P
GO:0007263	13	0.97	1	1	1	0.738	1	0.941	1	0.855	1	1	1	1	1	1	1	nitric oxide mediated signal transduction	P
GO:0007264	452	0.336	1	0.206	1	0.00569	0.093	0.02	0.41	0.499	1	0.714	1	0.974	1	0.866	1	small GTPase mediated signal transduction	P
GO:0007265	68	0.223	1	0.226	1	0.0364	0.587	0.0152	0.281	0.428	1	0.419	1	0.869	1	0.674	1	Ras protein signal transduction	P
GO:0007266	109	0.841	1	0.805	1	0.274	1	0.138	1	0.849	1	0.888	1	0.999	1	0.996	1	Rho protein signal transduction	P
GO:0007267	625	1	1	1	1	0.998	1	0.998	1	1	1	1	1	1	1	1	1	cell-cell signaling	P
GO:0007268	301	1	1	1	1	0.989	1	0.954	1	1	1	1	1	1	1	1	1	synaptic transmission	P
GO:0007269	60	0.999	1	0.997	1	0.984	1	0.445	1	0.995	1	1	1	1	1	1	1	neurotransmitter secretion	P
GO:0007270	47	0.862	1	0.958	1	0.219	1	0.88	1	0.99	1	0.953	1	0.547	1	0.96	1	nerve-nerve synaptic transmission	P
GO:0007271	19	0.693	1	0.706	1	0.146	1	0.811	1	0.971	1	0.666	1	0.306	1	0.699	1	synaptic transmission, cholinergic	P
GO:0007272	36	0.45	1	0.802	1	0.102	1	0.389	1	0.714	1	0.741	1	0.847	1	0.915	1	ensheathment of neurons	P
GO:0007274	13	0.488	1	0.398	1	0.661	1	0.112	1	0.556	1	0.574	1	0.376	1	0.998	1	neuromuscular synaptic transmission	P
GO:0007275	2890	1	1	1	1	1	1	1	1	1	1	1	1	1	1	1	1	development	P
GO:0007276	318	0.93	1	0.491	1	0.732	1	0.245	1	0.823	1	0.494	1	0.997	1	0.813	1	gametogenesis	P
GO:0007281	39	0.488	1	0.606	1	0.697	1	0.555	1	0.473	1	0.65	1	0.557	1	0.469	1	germ cell development	P
GO:0007283	251	0.811	1	0.33	1	0.772	1	0.175	1	0.63	1	0.335	1	0.973	1	0.813	1	spermatogenesis	P
GO:0007286	38	0.287	1	0.411	1	0.648	1	0.773	1	0.247	1	0.209	1	0.366	1	0.971	1	spermatid development	P
GO:0007292	47	0.399	1	0.563	1	0.378	1	0.949	1	0.294	1	0.369	1	0.998	1	0.779	1	female gamete generation	P
GO:0007338	64	0.604	1	0.691	1	0.466	1	0.667	1	0.731	1	0.591	1	0.294	1	0.918	1	fertilization (sensu Metazoa)	P
GO:0007339	15	0.177	1	0.0471	1	0.257	1	0.0422	1	0.274	1	0.049	1	0.166	1	0.857	1	binding of sperm to zona pellucida	P
GO:0007340	12	0.299	1	0.767	1	0.549	1	0.81	1	0.687	1	0.849	1	0.022	0.256	0.277	1	acrosome reaction	P
GO:0007342	10	0.582	1	0.992	1	0.361	1	1	1	0.497	1	0.864	1	1	1	1	1	fusion of sperm to egg plasma membrane	P
GO:0007346	39	0.211	1	0.23	1	0.144	1	0.101	1	0.28	1	0.406	1	0.314	1	0.313	1	regulation of progression through mitotic cell cycle	P
GO:0007368	33	0.713	1	0.773	1	0.353	1	0.846	1	0.818	1	0.767	1	0.724	1	0.518	1	determination of left/right symmetry	P
GO:0007369	55	0.986	1	0.975	1	0.919	1	0.323	1	0.96	1	0.985	1	1	1	1	1	gastrulation	P
GO:0007379	10	1	1	0.99	1	1	1	1	1	1	1	0.992	1	0.618	1	0.513	1	segment specification	P
GO:0007389	214	1	1	1	1	1	1	1	1	1	1	1	1	1	1	1	1	pattern specification	P
GO:0007398	183	1	1	1	1	1	1	1	1	1	1	1	1	1	1	1	1	ectoderm development	P
GO:0007399	847	1	1	1	1	1	1	1	1	1	1	1	1	1	1	1	1	nervous system development	P
GO:0007405	21	0.297	1	0.787	1	0.326	1	0.776	1	0.287	1	0.708	1	0.426	1	0.951	1	neuroblast proliferation	P
GO:0007409	167	1	1	1	1	1	1	1	1	1	1	1	1	1	1	1	1	axonogenesis	P
GO:0007411	88	1	1	1	1	1	1	1	1	1	1	1	1	1	1	1	1	axon guidance	P
GO:0007416	24	0.993	1	1	1	0.836	1	0.974	1	0.958	1	0.996	1	1	1	1	1	synaptogenesis	P
GO:0007417	336	1	1	1	1	1	1	1	1	1	1	1	1	1	1	1	1	central nervous system development	P
GO:0007420	220	1	1	1	1	1	1	1	1	1	1	1	1	1	1	1	1	brain development	P
GO:0007422	33	1	1	1	1	1	1	0.97	1	1	1	1	1	0.988	1	1	1	peripheral nervous system development	P
GO:0007423	129	1	1	1	1	0.983	1	1	1	1	1	1	1	1	1	0.999	1	sensory organ development	P
GO:0007431	11	0.988	1	1	1	0.989	1	0.992	1	0.966	1	1	1	1	1	0.997	1	salivary gland development	P
GO:0007492	12	1	1	0.98	1	1	1	1	1	1	1	0.822	1	1	1	1	1	endoderm development	P
GO:0007498	64	0.998	1	1	1	0.943	1	0.771	1	0.997	1	1	1	1	1	1	1	mesoderm development	P
GO:0007507	135	0.97	1	0.998	1	0.476	1	0.955	1	0.989	1	0.998	1	0.98	1	0.97	1	heart development	P
GO:0007512	12	1	1	1	1	1	1	1	1	1	1	1	1	1	1	0.82	1	adult heart development	P
GO:0007517	231	0.996	1	1	1	0.581	1	0.995	1	0.995	1	1	1	1	1	1	1	muscle development	P
GO:0007519	143	0.961	1	1	1	0.597	1	0.981	1	0.904	1	1	1	1	1	1	1	striated muscle development	P
GO:0007528	25	0.83	1	0.606	1	0.875	1	0.275	1	0.564	1	0.478	1	1	1	1	1	neuromuscular junction development	P
GO:0007530	23	0.916	1	0.999	1	0.349	1	0.98	1	0.929	1	0.998	1	1	1	0.919	1	sex determination	P
GO:0007548	101	0.999	1	1	1	0.92	1	0.997	1	1	1	1	1	0.768	1	0.981	1	sex differentiation	P
GO:0007565	71	1	1	1	1	0.943	1	0.997	1	1	1	1	1	0.893	1	1	1	pregnancy	P
GO:0007566	16	0.99	1	0.853	1	0.485	1	0.846	1	1	1	0.636	1	0.953	1	0.997	1	embryo implantation	P
GO:0007568	44	0.608	1	0.502	1	0.998	1	0.589	1	0.31	1	0.379	1	0.581	1	0.813	1	aging	P
GO:0007569	20	0.363	1	0.211	1	0.701	1	0.177	1	0.299	1	0.194	1	0.408	1	0.755	1	cell aging	P
GO:0007582	12494	0.994	1	0.582	1	9.76e-10	0	1.62e-09	0	0.999	1	0.884	1	1	1	1	1	physiological process	P
GO:0007584	65	0.903	1	0.616	1	0.321	1	0.844	1	0.93	1	0.476	1	0.924	1	0.657	1	response to nutrient	P
GO:0007585	39	1	1	1	1	0.994	1	0.995	1	0.997	1	1	1	1	1	1	1	respiratory gaseous exchange	P
GO:0007586	86	0.992	1	0.996	1	0.743	1	0.959	1	0.995	1	0.973	1	0.986	1	1	1	digestion	P
GO:0007588	49	0.981	1	0.986	1	0.214	1	0.677	1	0.999	1	0.981	1	0.959	1	0.998	1	excretion	P
GO:0007595	20	0.955	1	1	1	0.961	1	0.795	1	0.911	1	1	1	0.993	1	0.999	1	lactation	P
GO:0007596	144	1	1	1	1	0.961	1	1	1	0.996	1	1	1	1	1	1	1	blood coagulation	P
GO:0007599	150	1	1	1	1	0.948	1	1	1	0.996	1	1	1	1	1	1	1	hemostasis	P
GO:0007600	458	1	1	1	1	0.999	1	1	1	1	1	1	1	1	1	1	1	sensory perception	P
GO:0007601	214	0.979	1	0.998	1	0.47	1	0.893	1	0.957	1	0.989	1	1	1	0.998	1	visual perception	P
GO:0007602	30	0.992	1	0.929	1	0.736	1	0.989	1	0.955	1	0.783	1	0.998	1	0.836	1	phototransduction	P
GO:0007605	143	1	1	1	1	1	1	0.996	1	1	1	1	1	1	1	1	1	sensory perception of sound	P
GO:0007606	88	1	1	1	1	0.996	1	1	1	1	1	1	1	1	1	1	1	sensory perception of chemical stimulus	P
GO:0007608	69	1	1	1	1	0.999	1	1	1	1	1	0.999	1	1	1	1	1	sensory perception of smell	P
GO:0007610	433	1	1	1	1	0.994	1	0.99	1	1	1	1	1	1	1	1	1	behavior	P
GO:0007611	71	0.985	1	0.974	1	0.545	1	0.989	1	0.997	1	0.79	1	0.981	1	1	1	learning and/or memory	P
GO:0007612	39	0.942	1	0.934	1	0.733	1	0.981	1	0.931	1	0.746	1	0.977	1	0.996	1	learning	P
GO:0007613	20	0.984	1	1	1	0.45	1	0.848	1	1	1	0.996	1	0.993	1	1	1	memory	P
GO:0007617	13	1	1	0.998	1	0.9	1	1	1	0.998	1	0.943	1	1	1	1	1	mating behavior	P
GO:0007623	32	0.995	1	0.851	1	0.99	1	0.351	1	0.859	1	0.887	1	1	1	1	1	circadian rhythm	P
GO:0007626	277	1	1	1	1	0.976	1	0.783	1	1	1	1	1	1	1	1	1	locomotory behavior	P
GO:0007628	17	0.99	1	1	1	0.679	1	0.956	1	1	1	1	1	0.996	1	1	1	adult walking behavior	P
GO:0007631	46	1	1	1	1	0.966	1	0.996	1	1	1	0.999	1	1	1	1	1	feeding behavior	P
GO:0007632	21	0.912	1	0.992	1	0.401	1	0.832	1	0.976	1	0.98	1	0.907	1	0.999	1	visual behavior	P
GO:0008009	55	1	1	0.998	1	0.881	1	0.994	1	1	1	0.987	1	1	1	0.999	1	chemokine activity	F
GO:0008013	14	0.000473	0.016	0.0273	1	8.34e-05	0.00457	0.00507	0.0684	0.0109	0.301	0.0658	1	0.0532	1	0.0877	1	beta-catenin binding	F
GO:0008015	178	1	1	1	1	0.778	1	1	1	1	1	1	1	0.998	1	1	1	circulation	P
GO:0008016	51	0.999	1	1	1	0.981	1	1	1	1	1	1	1	0.782	1	1	1	regulation of heart contraction	P
GO:0008017	56	0.0273	1	0.00885	0.384	0.0342	0.587	0.0144	0.281	0.0449	1	0.0147	0.565	0.203	1	0.124	1	microtubule binding	F
GO:0008021	76	0.975	1	0.977	1	0.516	1	0.432	1	0.991	1	0.99	1	0.999	1	1	1	synaptic vesicle	C
GO:0008022	101	0.181	1	0.124	1	0.0686	1	0.0468	1	0.144	1	0.237	1	0.993	1	0.324	1	protein C-terminus binding	F
GO:0008023	12	0.957	1	0.434	1	0.614	1	0.208	1	0.953	1	0.889	1	0.979	1	0.168	1	transcription elongation factor complex	C
GO:0008026	106	0.385	1	0.0178	0.924	0.172	1	0.00097	0.0111	0.608	1	0.0446	1	0.411	1	0.676	1	ATP-dependent helicase activity	F
GO:0008028	19	0.921	1	0.873	1	0.576	1	0.499	1	0.942	1	0.855	1	0.966	1	0.96	1	monocarboxylic acid transporter activity	F
GO:0008033	60	0.182	1	0.0326	1	0.395	1	0.0513	1	0.0748	1	0.225	1	0.69	1	0.25	1	tRNA processing	P
GO:0008034	29	0.917	1	0.812	1	0.292	1	0.99	1	0.943	1	0.59	1	1	1	0.982	1	lipoprotein binding	F
GO:0008037	28	0.996	1	1	1	0.929	1	0.999	1	0.991	1	1	1	1	1	0.97	1	cell recognition	P
GO:0008038	16	1	1	1	1	1	1	1	1	1	1	1	1	1	1	1	1	neuron recognition	P
GO:0008045	10	1	1	0.973	1	0.992	1	1	1	1	1	0.818	1	1	1	0.999	1	motor axon guidance	P
GO:0008047	356	0.901	1	0.971	1	0.134	1	0.694	1	0.965	1	0.972	1	0.957	1	0.956	1	enzyme activator activity	F
GO:0008060	31	0.0207	1	0.604	1	0.0344	0.587	0.145	1	0.151	1	0.805	1	0.0157	0.207	0.458	1	ARF GTPase activator activity	F
GO:0008064	54	0.0443	1	0.23	1	0.0428	0.724	0.0732	1	0.0263	0.655	0.277	1	0.892	1	0.625	1	regulation of actin polymerization and/or depolymerization	P
GO:0008066	53	1	1	1	1	0.995	1	0.959	1	1	1	1	1	1	1	1	1	glutamate receptor activity	F
GO:0008067	35	1	1	1	1	1	1	0.821	1	1	1	1	1	1	1	0.999	1	metabotropic glutamate, GABA-B-like receptor activity	F
GO:0008076	155	0.998	1	0.995	1	0.975	1	0.913	1	1	1	0.989	1	0.886	1	1	1	voltage-gated potassium channel complex	C
GO:0008080	57	0.738	1	0.446	1	0.19	1	0.182	1	0.829	1	0.408	1	0.888	1	0.957	1	N-acetyltransferase activity	F
GO:0008081	89	0.484	1	0.966	1	0.168	1	0.764	1	0.756	1	0.968	1	0.323	1	0.959	1	phosphoric diester hydrolase activity	F
GO:0008083	193	1	1	1	1	0.513	1	1	1	1	1	1	1	0.998	1	1	1	growth factor activity	F
GO:0008088	13	0.353	1	0.239	1	0.153	1	0.0689	1	0.425	1	0.37	1	0.542	1	0.326	1	axon cargo transport	P
GO:0008092	467	0.276	1	0.572	1	0.000156	0.00457	0.0708	1	0.589	1	0.703	1	0.998	1	0.874	1	cytoskeletal protein binding	F
GO:0008094	46	0.01	0.177	0.00233	0.051	0.016	0.192	0.00909	0.112	0.025	0.655	0.00506	0.074	0.0461	1	0.051	0.81	DNA-dependent ATPase activity	F
GO:0008104	963	0.00295	0.049	5.14e-06	0.00141	2.43e-06	0.000848	6.92e-06	0.000832	0.0155	0.301	0.000655	0.0102	0.938	1	0.308	1	protein localization	P
GO:0008105	12	0.995	1	0.961	1	0.491	1	0.429	1	0.998	1	0.987	1	1	1	0.873	1	asymmetric protein localization	P
GO:0008121	12	0.133	1	0.225	1	0.298	1	0.171	1	0.215	1	0.346	1	0.0838	1	0.344	1	ubiquinol-cytochrome-c reductase activity	F
GO:0008134	462	0.983	1	0.0425	1	0.214	1	0.0019	0.027	0.985	1	0.0961	1	1	1	0.751	1	transcription factor binding	F
GO:0008135	101	0.0121	0.272	0.00142	0.039	0.00856	0.157	0.00353	0.056	0.051	1	0.00562	0.074	0.443	1	0.0393	0.81	translation factor activity, nucleic acid binding	F
GO:0008137	44	0.0298	1	0.0103	0.384	0.37	1	0.0442	1	0.0056	0.135	0.0191	0.565	0.871	1	0.162	1	NADH dehydrogenase (ubiquinone) activity	F
GO:0008138	48	0.896	1	0.507	1	0.155	1	0.376	1	0.982	1	0.671	1	0.999	1	0.248	1	protein tyrosine/serine/threonine phosphatase activity	F
GO:0008144	23	0.553	1	0.521	1	0.732	1	0.291	1	0.469	1	0.89	1	0.578	1	0.182	1	drug binding	F
GO:0008146	46	0.403	1	0.502	1	0.146	1	0.51	1	0.341	1	0.339	1	0.937	1	0.964	1	sulfotransferase activity	F
GO:0008150	14254	1	1	0.997	1	6.43e-07	0.000848	5.09e-06	0.000832	1	1	0.999	1	1	1	1	1	biological_process	P
GO:0008152	8605	0.0526	1	4.39e-08	0.001	4.74e-16	0	1.89e-20	0	0.516	1	0.00132	0.017	0.999	1	0.871	1	metabolism	P
GO:0008154	72	0.133	1	0.515	1	0.0922	1	0.139	1	0.0842	1	0.611	1	0.928	1	0.683	1	actin polymerization and/or depolymerization	P
GO:0008156	18	0.0637	1	0.0896	1	0.0183	0.236	0.0602	1	0.125	1	0.247	1	0.124	1	0.0881	1	negative regulation of DNA replication	P
GO:0008168	178	0.000502	0.016	0.000264	0.00826	0.00035	0.00718	0.000141	0.007	0.0112	0.301	0.00452	0.074	0.291	1	0.0939	1	methyltransferase activity	F
GO:0008170	49	0.108	1	0.0563	1	0.0187	0.236	0.112	1	0.157	1	0.194	1	0.616	1	0.0571	1	N-methyltransferase activity	F
GO:0008172	10	0.559	1	0.83	1	0.454	1	0.622	1	0.484	1	0.75	1	0.991	1	1	1	S-methyltransferase activity	F
GO:0008173	24	0.0695	1	0.0257	1	0.0738	1	0.0501	1	0.0791	1	0.0383	1	0.393	1	0.398	1	RNA methyltransferase activity	F
GO:0008175	11	0.22	1	0.562	1	0.35	1	0.557	1	0.175	1	0.524	1	0.314	1	0.514	1	tRNA methyltransferase activity	F
GO:0008180	10	0.221	1	0.234	1	0.662	1	0.0499	1	0.19	1	0.538	1	0.32	1	0.0718	1	signalosome complex	C
GO:0008186	23	0.577	1	0.0995	1	0.253	1	0.0811	1	0.927	1	0.0795	1	0.154	1	0.909	1	RNA-dependent ATPase activity	F
GO:0008188	126	1	1	1	1	0.994	1	0.7	1	1	1	1	1	1	1	1	1	neuropeptide receptor activity	F
GO:0008191	10	0.995	1	0.999	1	0.99	1	0.499	1	0.989	1	1	1	0.997	1	1	1	metalloendopeptidase inhibitor activity	F
GO:0008194	103	1	1	0.976	1	0.657	1	0.861	1	1	1	0.906	1	1	1	0.998	1	UDP-glycosyltransferase activity	F
GO:0008199	11	0.858	1	0.913	1	1	1	1	1	0.807	1	0.876	1	0.508	1	0.597	1	ferric iron binding	F
GO:0008201	86	0.999	1	1	1	0.987	1	1	1	0.98	1	1	1	0.998	1	0.969	1	heparin binding	F
GO:0008202	209	0.967	1	0.957	1	0.0533	1	0.241	1	0.992	1	0.987	1	1	1	0.953	1	steroid metabolism	P
GO:0008203	87	0.509	1	0.331	1	0.0388	0.587	0.105	1	0.752	1	0.529	1	0.867	1	0.748	1	cholesterol metabolism	P
GO:0008206	18	0.238	1	0.682	1	0.0225	0.263	0.528	1	0.552	1	0.594	1	0.804	1	0.992	1	bile acid metabolism	P
GO:0008207	19	0.979	1	0.999	1	0.67	1	0.642	1	0.986	1	1	1	1	1	0.986	1	C21-steroid hormone metabolism	P
GO:0008209	10	0.913	1	0.685	1	0.324	1	0.119	1	0.996	1	0.939	1	0.945	1	0.856	1	androgen metabolism	P
GO:0008210	12	0.904	1	1	1	0.68	1	0.961	1	0.943	1	1	1	0.93	1	0.948	1	estrogen metabolism	P
GO:0008213	28	0.0783	1	0.0262	1	0.0568	1	0.00881	0.112	0.167	1	0.137	1	0.245	1	0.0155	0.138	protein amino acid alkylation	P
GO:0008217	68	0.999	1	1	1	0.688	1	0.999	1	0.999	1	1	1	1	1	1	1	blood pressure regulation	P
GO:0008219	916	0.976	1	0.877	1	0.0104	0.157	0.283	1	1	1	0.935	1	0.999	1	0.957	1	cell death	P
GO:0008227	157	0.977	1	0.989	1	0.945	1	0.615	1	0.933	1	0.981	1	0.986	1	1	1	amine receptor activity	F
GO:0008233	691	0.895	1	0.988	1	0.12	1	0.089	1	0.947	1	0.997	1	0.989	1	1	1	peptidase activity	F
GO:0008234	162	0.187	1	0.00393	0.063	0.00331	0.035	8.44e-05	0.00391	0.482	1	0.0277	1	0.628	1	0.533	1	cysteine-type peptidase activity	F
GO:0008235	57	0.436	1	0.841	1	0.147	1	0.385	1	0.616	1	0.852	1	0.638	1	0.98	1	metalloexopeptidase activity	F
GO:0008236	238	0.945	1	1	1	0.636	1	0.798	1	0.932	1	1	1	0.964	1	0.982	1	serine-type peptidase activity	F
GO:0008237	203	0.957	1	0.995	1	0.22	1	0.696	1	0.986	1	0.993	1	0.974	1	0.999	1	metallopeptidase activity	F
GO:0008238	106	0.547	1	0.723	1	0.314	1	0.041	1	0.576	1	0.818	1	0.852	1	0.999	1	exopeptidase activity	F
GO:0008239	12	0.266	1	0.416	1	0.301	1	0.473	1	0.297	1	0.329	1	0.493	1	0.595	1	dipeptidyl-peptidase activity	F
GO:0008270	2350	0.599	1	4.47e-07	0.001	0.00202	0.018	6.53e-07	0	0.813	1	8.06e-05	0.00229	0.991	1	0.075	1	zinc ion binding	F
GO:0008271	10	0.175	1	0.685	1	0.00143	0.016	0.42	1	0.49	1	0.658	1	0.539	1	0.996	1	sulfate porter activity	F
GO:0008272	15	0.192	1	0.227	1	0.00959	0.157	0.115	1	0.377	1	0.25	1	0.713	1	0.548	1	sulfate transport	P
GO:0008276	44	0.00426	0.137	0.00208	0.051	0.000319	0.00718	0.00188	0.027	0.0156	0.301	0.0181	0.565	0.461	1	0.011	0.138	protein methyltransferase activity	F
GO:0008277	37	0.69	1	0.997	1	0.968	1	0.942	1	0.518	1	0.998	1	0.604	1	0.885	1	regulation of G-protein coupled receptor protein signaling pathway	P
GO:0008283	883	1	1	1	1	0.993	1	0.874	1	1	1	1	1	1	1	0.999	1	cell proliferation	P
GO:0008284	289	0.985	1	1	1	0.956	1	0.982	1	0.874	1	1	1	1	1	0.896	1	positive regulation of cell proliferation	P
GO:0008285	283	1	1	1	1	1	1	0.93	1	1	1	1	1	1	1	1	1	negative regulation of cell proliferation	P
GO:0008286	37	0.755	1	0.55	1	0.37	1	0.0719	1	0.774	1	0.722	1	0.982	1	0.911	1	insulin receptor signaling pathway	P
GO:0008287	39	0.283	1	0.222	1	0.132	1	0.0944	1	0.53	1	0.483	1	0.257	1	0.394	1	protein serine/threonine phosphatase complex	C
GO:0008289	337	0.113	1	0.21	1	0.0007	0.0125	0.0234	0.41	0.172	1	0.181	1	0.99	1	0.998	1	lipid binding	F
GO:0008299	16	0.0533	1	0.749	1	0.055	1	0.17	1	0.0517	1	0.947	1	0.483	1	0.562	1	isoprenoid biosynthesis	P
GO:0008305	30	0.143	1	0.89	1	0.044	0.724	0.306	1	0.199	1	0.917	1	0.4	1	1	1	integrin complex	C
GO:0008306	10	0.915	1	0.773	1	0.824	1	0.871	1	0.906	1	0.56	1	1	1	0.995	1	associative learning	P
GO:0008307	39	0.533	1	1	1	0.389	1	1	1	0.53	1	1	1	0.662	1	1	1	structural constituent of muscle	F
GO:0008312	11	0.914	1	0.176	1	0.854	1	0.194	1	0.897	1	0.197	1	0.913	1	0.407	1	7S RNA binding	F
GO:0008324	749	0.999	1	0.994	1	0.565	1	0.818	1	0.998	1	0.975	1	1	1	1	1	cation transporter activity	F
GO:0008329	10	0.651	1	0.619	1	0.906	1	0.562	1	0.451	1	0.678	1	0.737	1	0.427	1	pattern recognition receptor activity	F
GO:0008344	38	0.697	1	0.795	1	0.247	1	0.607	1	0.826	1	0.714	1	0.92	1	0.996	1	adult locomotory behavior	P
GO:0008360	48	0.306	1	0.486	1	0.0815	1	0.374	1	0.435	1	0.481	1	0.918	1	0.747	1	regulation of cell shape	P
GO:0008361	215	0.999	1	1	1	0.783	1	0.477	1	0.999	1	1	1	1	1	1	1	regulation of cell size	P
GO:0008366	36	0.45	1	0.802	1	0.102	1	0.389	1	0.714	1	0.741	1	0.847	1	0.915	1	axon ensheathment	P
GO:0008373	20	0.967	1	0.752	1	0.897	1	0.984	1	0.953	1	0.448	1	0.97	1	0.912	1	sialyltransferase activity	F
GO:0008374	40	0.626	1	0.536	1	0.689	1	0.279	1	0.697	1	0.541	1	0.487	1	0.917	1	O-acyltransferase activity	F
GO:0008375	32	0.994	1	0.463	1	0.5	1	0.534	1	0.997	1	0.364	1	0.974	1	0.998	1	acetylglucosaminyltransferase activity	F
GO:0008376	29	0.997	1	1	1	0.851	1	0.723	1	0.997	1	1	1	1	1	1	1	acetylgalactosaminyltransferase activity	F
GO:0008378	30	0.997	1	0.829	1	0.635	1	0.207	1	0.99	1	0.927	1	1	1	0.954	1	galactosyltransferase activity	F
GO:0008380	275	7.24e-05	0.005	2.45e-08	0.001	1.06e-05	0.000971	9.65e-07	0	0.0167	0.381	2.98e-06	0.00229	0.0986	1	0.0127	0.138	RNA splicing	P
GO:0008395	13	0.996	1	1	1	0.998	1	1	1	0.939	1	1	1	0.948	1	0.899	1	steroid hydroxylase activity	F
GO:0008406	71	0.996	1	1	1	0.873	1	0.999	1	1	1	1	1	0.429	1	1	1	gonad development	P
GO:0008408	26	0.456	1	0.0577	1	0.164	1	0.0587	1	0.432	1	0.0697	1	0.925	1	0.64	1	3'-5' exonuclease activity	F
GO:0008415	187	0.16	1	0.0673	1	0.00304	0.035	0.0114	0.127	0.637	1	0.232	1	0.912	1	0.348	1	acyltransferase activity	F
GO:0008417	13	0.365	1	0.0211	0.924	0.217	1	0.0626	1	0.522	1	0.0396	1	0.674	1	0.0482	0.81	fucosyltransferase activity	F
GO:0008430	29	0.231	1	0.526	1	0.171	1	0.206	1	0.273	1	0.737	1	0.501	1	0.242	1	selenium binding	F
GO:0008443	12	0.891	1	0.453	1	0.487	1	0.196	1	0.948	1	0.632	1	0.988	1	0.496	1	phosphofructokinase activity	F
GO:0008483	23	0.0348	1	0.166	1	0.0563	1	0.0262	0.41	0.14	1	0.288	1	0.238	1	0.712	1	transaminase activity	F
GO:0008484	20	0.837	1	0.888	1	0.217	1	0.129	1	0.961	1	0.989	1	0.949	1	0.993	1	sulfuric ester hydrolase activity	F
GO:0008493	27	0.952	1	0.951	1	0.924	1	0.904	1	0.877	1	0.879	1	0.886	1	0.999	1	tetracycline transporter activity	F
GO:0008509	187	1	1	0.999	1	0.86	1	0.829	1	1	1	0.993	1	0.962	1	1	1	anion transporter activity	F
GO:0008514	10	0.336	1	1	1	0.759	1	0.579	1	0.251	1	0.999	1	0.334	1	1	1	organic anion transporter activity	F
GO:0008528	261	1	1	1	1	1	1	0.87	1	1	1	1	1	1	1	1	1	peptide receptor activity, G-protein coupled	F
GO:0008533	14	0.973	1	0.997	1	0.943	1	0.378	1	0.942	1	1	1	0.505	1	0.998	1	astacin activity	F
GO:0008536	10	0.445	1	0.0146	0.384	0.99	1	0.0298	0.542	0.215	1	0.0611	1	0.816	1	0.0234	0.252	Ran GTPase binding	F
GO:0008542	18	0.899	1	0.986	1	0.529	1	0.868	1	0.958	1	0.94	1	0.847	1	1	1	visual learning	P
GO:0008543	31	1	1	1	1	1	1	1	1	1	1	1	1	0.642	1	0.998	1	fibroblast growth factor receptor signaling pathway	P
GO:0008544	169	1	1	1	1	1	1	1	1	1	1	1	1	1	1	1	1	epidermis development	P
GO:0008553	10	0.233	1	0.035	1	0.435	1	0.143	1	0.377	1	0.0546	1	0.119	1	0.294	1	hydrogen-exporting ATPase activity, phosphorylative mechanism	F
GO:0008565	93	0.0214	1	4.78e-06	0.00141	0.00167	0.016	6.63e-06	0.000832	0.0525	1	5.67e-05	0.00229	0.545	1	0.105	1	protein transporter activity	F
GO:0008584	30	0.998	1	0.982	1	0.96	1	0.997	1	0.997	1	0.944	1	0.617	1	0.995	1	male gonad development	P
GO:0008585	41	0.731	1	0.977	1	0.488	1	0.948	1	0.937	1	0.96	1	0.25	1	0.941	1	female gonad development	P
GO:0008589	14	0.999	1	1	1	1	1	0.817	1	0.975	1	1	1	1	1	0.984	1	regulation of smoothened signaling pathway	P
GO:0008601	23	0.318	1	0.545	1	0.376	1	0.303	1	0.24	1	0.549	1	0.596	1	0.799	1	protein phosphatase type 2A regulator activity	F
GO:0008603	28	0.901	1	0.959	1	0.981	1	0.988	1	0.901	1	0.958	1	0.662	1	0.719	1	cAMP-dependent protein kinase regulator activity	F
GO:0008610	315	0.861	1	0.5	1	0.089	1	0.00755	0.081	0.921	1	0.837	1	1	1	0.956	1	lipid biosynthesis	P
GO:0008624	48	0.829	1	0.459	1	0.796	1	0.198	1	0.854	1	0.635	1	0.707	1	0.42	1	induction of apoptosis by extracellular signals	P
GO:0008625	17	0.908	1	0.557	1	0.678	1	0.19	1	0.982	1	0.749	1	0.372	1	0.356	1	induction of apoptosis via death domain receptors	P
GO:0008629	42	0.339	1	0.0437	1	0.426	1	0.00211	0.027	0.406	1	0.144	1	0.288	1	0.399	1	induction of apoptosis by intracellular signals	P
GO:0008630	23	0.274	1	0.0396	1	0.76	1	0.00781	0.081	0.157	1	0.0763	1	0.646	1	0.338	1	DNA damage response, signal transduction resulting in induction of apoptosis	P
GO:0008632	104	0.15	1	0.0252	1	0.329	1	0.0177	0.41	0.183	1	0.0654	1	0.326	1	0.222	1	apoptotic program	P
GO:0008633	21	0.877	1	0.291	1	0.488	1	0.375	1	0.946	1	0.482	1	0.785	1	0.11	1	activation of pro-apoptotic gene products	P
GO:0008637	22	0.526	1	0.0876	1	0.486	1	0.159	1	0.56	1	0.089	1	0.411	1	0.526	1	apoptotic mitochondrial changes	P
GO:0008643	75	0.824	1	0.431	1	0.512	1	0.175	1	0.762	1	0.417	1	0.999	1	0.931	1	carbohydrate transport	P
GO:0008645	45	0.948	1	0.575	1	0.823	1	0.558	1	0.895	1	0.459	1	1	1	0.928	1	hexose transport	P
GO:0008652	91	0.776	1	0.643	1	0.166	1	0.301	1	0.947	1	0.496	1	0.94	1	1	1	amino acid biosynthesis	P
GO:0008654	86	0.782	1	0.261	1	0.447	1	0.082	1	0.703	1	0.539	1	0.997	1	0.609	1	phospholipid biosynthesis	P
GO:0008656	15	0.119	1	0.178	1	0.258	1	0.118	1	0.148	1	0.26	1	0.0614	1	0.187	1	caspase activator activity	F
GO:0008667	44	0.838	1	0.251	1	0.451	1	0.408	1	0.889	1	0.15	1	0.922	1	0.917	1	2,3-dihydro-2,3-dihydroxybenzoate dehydrogenase activity	F
GO:0008757	78	0.00169	0.049	0.000584	0.019	0.00194	0.018	0.000959	0.0111	0.00207	0.043	0.0135	0.565	0.428	1	0.0146	0.138	S-adenosylmethionine-dependent methyltransferase activity	F
GO:0009055	350	0.413	1	0.643	1	0.277	1	0.0843	1	0.645	1	0.781	1	0.43	1	0.939	1	electron carrier activity	F
GO:0009056	784	0.000947	0.016	4.59e-05	0.004	7.19e-05	0.00457	8.38e-07	0	0.047	1	0.00131	0.017	0.676	1	0.314	1	catabolism	P
GO:0009057	462	0.000229	0.011	5.2e-07	0.001	0.00121	0.0125	9.98e-09	0	0.00761	0.202	7.58e-05	0.00229	0.629	1	0.0497	0.81	macromolecule catabolism	P
GO:0009058	1540	0.0202	1	0.0127	0.384	0.000244	0.006	0.000101	0.007	0.0819	1	0.0738	1	0.887	1	0.673	1	biosynthesis	P
GO:0009059	894	0.0177	0.562	0.00361	0.063	0.0598	1	0.00133	0.018	0.034	0.655	0.0144	0.565	0.538	1	0.396	1	macromolecule biosynthesis	P
GO:0009060	37	0.228	1	0.157	1	0.0999	1	0.479	1	0.481	1	0.0587	1	0.344	1	0.892	1	aerobic respiration	P
GO:0009063	64	0.197	1	0.308	1	0.137	1	0.363	1	0.218	1	0.296	1	0.595	1	0.52	1	amino acid catabolism	P
GO:0009064	52	0.395	1	0.936	1	0.187	1	0.739	1	0.527	1	0.875	1	0.608	1	0.998	1	glutamine family amino acid metabolism	P
GO:0009065	18	0.546	1	0.904	1	0.281	1	0.855	1	0.547	1	0.881	1	0.998	1	0.713	1	glutamine family amino acid catabolism	P
GO:0009066	26	0.364	1	0.779	1	0.0465	0.868	0.262	1	0.71	1	0.814	1	0.549	1	0.998	1	aspartate family amino acid metabolism	P
GO:0009067	14	0.0806	1	0.599	1	0.0112	0.157	0.404	1	0.341	1	0.601	1	0.524	1	0.927	1	aspartate family amino acid biosynthesis	P
GO:0009069	24	0.0614	1	0.0773	1	0.148	1	0.0963	1	0.156	1	0.0822	1	0.138	1	0.222	1	serine family amino acid metabolism	P
GO:0009072	73	0.633	1	0.43	1	0.221	1	0.687	1	0.676	1	0.249	1	0.957	1	0.902	1	aromatic amino acid family metabolism	P
GO:0009073	45	0.862	1	0.281	1	0.492	1	0.444	1	0.905	1	0.166	1	0.927	1	0.927	1	aromatic amino acid family biosynthesis	P
GO:0009074	15	0.173	1	0.459	1	0.158	1	0.941	1	0.18	1	0.381	1	0.603	1	0.272	1	aromatic amino acid family catabolism	P
GO:0009075	12	0.958	1	0.938	1	0.465	1	0.347	1	0.911	1	0.992	1	1	1	0.94	1	histidine family amino acid metabolism	P
GO:0009081	13	0.242	1	0.0256	1	0.139	1	0.029	0.542	0.355	1	0.0575	1	0.725	1	0.6	1	branched chain family amino acid metabolism	P
GO:0009084	20	0.495	1	0.889	1	0.255	1	0.647	1	0.643	1	0.782	1	0.525	1	0.998	1	glutamine family amino acid biosynthesis	P
GO:0009100	148	0.363	1	0.111	1	0.039	0.587	0.0271	0.41	0.535	1	0.15	1	0.864	1	0.857	1	glycoprotein metabolism	P
GO:0009101	122	0.64	1	0.141	1	0.107	1	0.0421	1	0.778	1	0.191	1	0.901	1	0.815	1	glycoprotein biosynthesis	P
GO:0009108	86	0.00807	0.156	0.016	0.384	0.00226	0.018	0.0631	1	0.0741	1	0.0514	1	0.359	1	0.09	1	coenzyme biosynthesis	P
GO:0009109	27	0.36	1	0.16	1	0.0929	1	0.606	1	0.463	1	0.056	1	0.972	1	0.878	1	coenzyme catabolism	P
GO:0009110	26	0.379	1	0.429	1	0.133	1	0.243	1	0.382	1	0.466	1	0.796	1	0.846	1	vitamin biosynthesis	P
GO:0009112	19	0.0127	0.272	0.0277	1	0.036	0.587	0.0133	0.281	0.109	1	0.0523	1	0.163	1	0.282	1	nucleobase metabolism	P
GO:0009116	33	0.402	1	0.053	1	0.0709	1	0.00637	0.081	0.906	1	0.118	1	0.518	1	0.489	1	nucleoside metabolism	P
GO:0009117	202	0.159	1	0.171	1	0.0114	0.157	0.0305	0.542	0.414	1	0.263	1	0.824	1	0.833	1	nucleotide metabolism	P
GO:0009119	13	0.399	1	0.0675	1	0.0648	1	0.00761	0.081	0.978	1	0.0986	1	0.414	1	0.617	1	ribonucleoside metabolism	P
GO:0009123	24	0.357	1	0.081	1	0.292	1	0.0231	0.41	0.537	1	0.156	1	0.223	1	0.306	1	nucleoside monophosphate metabolism	P
GO:0009124	24	0.357	1	0.081	1	0.292	1	0.0231	0.41	0.537	1	0.156	1	0.223	1	0.306	1	nucleoside monophosphate biosynthesis	P
GO:0009126	18	0.559	1	0.133	1	0.509	1	0.135	1	0.659	1	0.119	1	0.24	1	0.389	1	purine nucleoside monophosphate metabolism	P
GO:0009127	18	0.559	1	0.133	1	0.509	1	0.135	1	0.659	1	0.119	1	0.24	1	0.389	1	purine nucleoside monophosphate biosynthesis	P
GO:0009132	13	0.662	1	0.321	1	0.773	1	0.2	1	0.805	1	0.413	1	0.253	1	0.596	1	nucleoside diphosphate metabolism	P
GO:0009141	62	0.0238	1	0.25	1	0.0163	0.192	0.0986	1	0.0617	1	0.327	1	0.729	1	0.865	1	nucleoside triphosphate metabolism	P
GO:0009142	42	0.0592	1	0.293	1	0.0542	1	0.2	1	0.134	1	0.31	1	0.416	1	0.744	1	nucleoside triphosphate biosynthesis	P
GO:0009143	10	0.0597	1	0.539	1	0.0715	1	0.268	1	0.051	1	0.592	1	0.392	1	0.997	1	nucleoside triphosphate catabolism	P
GO:0009144	51	0.00588	0.137	0.18	1	0.0135	0.192	0.149	1	0.0176	0.381	0.213	1	0.6	1	0.749	1	purine nucleoside triphosphate metabolism	P
GO:0009145	37	0.0224	1	0.353	1	0.0354	0.587	0.37	1	0.0657	1	0.304	1	0.372	1	0.743	1	purine nucleoside triphosphate biosynthesis	P
GO:0009147	17	0.707	1	0.702	1	0.495	1	0.273	1	0.725	1	0.917	1	0.821	1	0.957	1	pyrimidine nucleoside triphosphate metabolism	P
GO:0009150	70	0.0146	0.272	0.101	1	0.0171	0.236	0.0946	1	0.037	1	0.121	1	0.498	1	0.709	1	purine ribonucleotide metabolism	P
GO:0009152	57	0.049	1	0.237	1	0.046	0.868	0.259	1	0.116	1	0.205	1	0.289	1	0.697	1	purine ribonucleotide biosynthesis	P
GO:0009156	23	0.336	1	0.0679	1	0.234	1	0.0118	0.127	0.525	1	0.16	1	0.177	1	0.244	1	ribonucleoside monophosphate biosynthesis	P
GO:0009161	23	0.336	1	0.0679	1	0.234	1	0.0118	0.127	0.525	1	0.16	1	0.177	1	0.244	1	ribonucleoside monophosphate metabolism	P
GO:0009165	130	0.305	1	0.271	1	0.08	1	0.134	1	0.56	1	0.302	1	0.519	1	0.925	1	nucleotide biosynthesis	P
GO:0009166	24	0.427	1	0.627	1	0.242	1	0.476	1	0.554	1	0.564	1	0.777	1	0.811	1	nucleotide catabolism	P
GO:0009167	18	0.559	1	0.133	1	0.509	1	0.135	1	0.659	1	0.119	1	0.24	1	0.389	1	purine ribonucleoside monophosphate metabolism	P
GO:0009168	18	0.559	1	0.133	1	0.509	1	0.135	1	0.659	1	0.119	1	0.24	1	0.389	1	purine ribonucleoside monophosphate biosynthesis	P
GO:0009187	44	1	1	0.999	1	0.942	1	0.998	1	0.999	1	0.995	1	1	1	1	1	cyclic nucleotide metabolism	P
GO:0009190	32	1	1	1	1	0.847	1	1	1	1	1	1	1	1	1	1	1	cyclic nucleotide biosynthesis	P
GO:0009199	50	0.00638	0.137	0.19	1	0.0141	0.192	0.128	1	0.0205	0.381	0.24	1	0.598	1	0.771	1	ribonucleoside triphosphate metabolism	P
GO:0009201	38	0.0238	1	0.343	1	0.0351	0.587	0.307	1	0.0738	1	0.306	1	0.373	1	0.777	1	ribonucleoside triphosphate biosynthesis	P
GO:0009205	49	0.00596	0.137	0.196	1	0.0143	0.192	0.154	1	0.0177	0.381	0.238	1	0.598	1	0.739	1	purine ribonucleoside triphosphate metabolism	P
GO:0009206	37	0.0224	1	0.353	1	0.0354	0.587	0.37	1	0.0657	1	0.304	1	0.372	1	0.743	1	purine ribonucleoside triphosphate biosynthesis	P
GO:0009208	11	0.31	1	0.753	1	0.354	1	0.331	1	0.273	1	0.912	1	0.629	1	0.966	1	pyrimidine ribonucleoside triphosphate metabolism	P
GO:0009209	11	0.31	1	0.753	1	0.354	1	0.331	1	0.273	1	0.912	1	0.629	1	0.966	1	pyrimidine ribonucleoside triphosphate biosynthesis	P
GO:0009218	16	0.153	1	0.451	1	0.129	1	0.104	1	0.206	1	0.681	1	0.369	1	0.708	1	pyrimidine ribonucleotide metabolism	P
GO:0009220	15	0.132	1	0.431	1	0.0992	1	0.0996	1	0.185	1	0.643	1	0.383	1	0.778	1	pyrimidine ribonucleotide biosynthesis	P
GO:0009225	15	0.172	1	0.105	1	0.175	1	0.049	1	0.172	1	0.239	1	0.296	1	0.378	1	nucleotide-sugar metabolism	P
GO:0009237	44	0.838	1	0.251	1	0.451	1	0.408	1	0.889	1	0.15	1	0.922	1	0.917	1	siderophore metabolism	P
GO:0009238	44	0.838	1	0.251	1	0.451	1	0.408	1	0.889	1	0.15	1	0.922	1	0.917	1	enterobactin metabolism	P
GO:0009239	44	0.838	1	0.251	1	0.451	1	0.408	1	0.889	1	0.15	1	0.922	1	0.917	1	enterobactin biosynthesis	P
GO:0009247	14	0.879	1	0.224	1	0.352	1	0.154	1	0.877	1	0.138	1	1	1	0.989	1	glycolipid biosynthesis	P
GO:0009250	30	0.664	1	1	1	0.189	1	0.964	1	0.84	1	0.998	1	0.978	1	1	1	glucan biosynthesis	P
GO:0009259	79	0.00671	0.137	0.0347	1	0.0117	0.157	0.0186	0.41	0.023	0.478	0.0836	1	0.411	1	0.502	1	ribonucleotide metabolism	P
GO:0009260	64	0.0282	1	0.103	1	0.0262	0.497	0.0516	1	0.0974	1	0.148	1	0.224	1	0.542	1	ribonucleotide biosynthesis	P
GO:0009261	10	0.0685	1	0.195	1	0.0798	1	0.11	1	0.0572	1	0.31	1	0.449	1	0.777	1	ribonucleotide catabolism	P
GO:0009262	16	0.921	1	0.503	1	0.547	1	0.416	1	0.996	1	0.539	1	0.381	1	0.571	1	deoxyribonucleotide metabolism	P
GO:0009266	229	0.997	1	0.995	1	0.27	1	0.926	1	1	1	0.984	1	0.982	1	0.999	1	response to temperature stimulus	P
GO:0009267	10	0.219	1	0.972	1	0.411	1	0.926	1	0.241	1	0.983	1	0.283	1	0.263	1	cellular response to starvation	P
GO:0009288	39	0.884	1	0.987	1	0.712	1	0.911	1	0.724	1	0.972	1	1	1	1	1	flagellum (sensu Bacteria)	C
GO:0009296	14	0.477	1	0.293	1	0.384	1	0.331	1	0.541	1	0.195	1	0.45	1	0.744	1	flagellum biogenesis	P
GO:0009303	14	0.128	1	0.186	1	0.198	1	0.496	1	0.15	1	0.149	1	0.824	1	0.911	1	rRNA transcription	P
GO:0009306	70	0.809	1	0.948	1	0.94	1	0.905	1	0.501	1	0.951	1	0.996	1	0.91	1	protein secretion	P
GO:0009308	558	0.375	1	0.632	1	0.00578	0.093	0.443	1	0.573	1	0.474	1	0.978	1	0.98	1	amine metabolism	P
GO:0009309	123	0.843	1	0.734	1	0.219	1	0.57	1	0.97	1	0.468	1	0.852	1	1	1	amine biosynthesis	P
GO:0009310	72	0.158	1	0.392	1	0.0693	1	0.327	1	0.193	1	0.395	1	0.693	1	0.61	1	amine catabolism	P
GO:0009311	19	0.363	1	0.95	1	0.981	1	0.73	1	0.323	1	0.975	1	0.25	1	0.806	1	oligosaccharide metabolism	P
GO:0009314	135	0.948	1	0.661	1	0.641	1	0.186	1	0.873	1	0.804	1	1	1	0.732	1	response to radiation	P
GO:0009331	13	0.791	1	0.571	1	0.404	1	0.255	1	0.893	1	0.797	1	0.786	1	0.77	1	glycerol-3-phosphate dehydrogenase complex	C
GO:0009395	15	0.892	1	0.699	1	0.275	1	0.501	1	0.969	1	0.68	1	0.992	1	0.999	1	phospholipid catabolism	P
GO:0009396	12	0.935	1	0.192	1	0.841	1	0.546	1	0.992	1	0.1	1	0.948	1	0.461	1	folic acid and derivative biosynthesis	P
GO:0009405	35	0.382	1	0.92	1	0.277	1	0.833	1	0.405	1	0.983	1	0.418	1	0.154	1	pathogenesis	P
GO:0009408	17	0.413	1	0.746	1	0.148	1	0.7	1	0.723	1	0.857	1	0.633	1	0.266	1	response to heat	P
GO:0009409	204	0.998	1	0.998	1	0.419	1	0.985	1	1	1	0.99	1	0.979	1	1	1	response to cold	P
GO:0009410	34	0.952	1	0.941	1	0.566	1	0.859	1	0.996	1	0.836	1	0.518	1	1	1	response to xenobiotic stimulus	P
GO:0009411	48	0.41	1	0.101	1	0.711	1	0.0247	0.41	0.252	1	0.336	1	0.708	1	0.186	1	response to UV	P
GO:0009416	106	0.86	1	0.513	1	0.641	1	0.218	1	0.684	1	0.666	1	0.993	1	0.539	1	response to light stimulus	P
GO:0009434	15	0.996	1	0.648	1	1	1	0.482	1	0.961	1	0.637	1	1	1	0.911	1	flagellum (sensu Eukaryota)	C
GO:0009451	36	0.0118	0.272	0.0119	0.384	0.0369	0.587	0.0468	1	0.0229	0.478	0.0938	1	0.455	1	0.102	1	RNA modification	P
GO:0009566	74	0.544	1	0.486	1	0.414	1	0.645	1	0.687	1	0.351	1	0.24	1	0.924	1	fertilization	P
GO:0009581	60	1	1	0.945	1	0.956	1	0.775	1	0.993	1	0.91	1	1	1	0.82	1	detection of external stimulus	P
GO:0009582	53	1	1	0.95	1	0.889	1	0.681	1	0.995	1	0.918	1	1	1	0.889	1	detection of abiotic stimulus	P
GO:0009583	33	0.981	1	0.92	1	0.616	1	0.974	1	0.933	1	0.807	1	0.998	1	0.747	1	detection of light stimulus	P
GO:0009593	16	1	1	1	1	1	1	0.988	1	1	1	1	1	0.994	1	1	1	detection of chemical stimulus	P
GO:0009595	15	0.804	1	0.551	1	0.855	1	0.305	1	0.588	1	0.649	1	0.863	1	0.5	1	detection of biotic stimulus	P
GO:0009605	851	1	1	1	1	0.996	1	1	1	1	1	1	1	1	1	1	1	response to external stimulus	P
GO:0009607	323	0.993	1	1	1	0.968	1	0.989	1	0.954	1	0.99	1	1	1	1	1	response to biotic stimulus	P
GO:0009611	566	1	1	1	1	0.998	1	1	1	1	1	1	1	1	1	1	1	response to wounding	P
GO:0009612	32	0.999	1	0.88	1	0.94	1	1	1	0.999	1	0.604	1	1	1	0.937	1	response to mechanical stimulus	P
GO:0009615	106	0.739	1	0.953	1	0.93	1	0.476	1	0.48	1	0.951	1	0.972	1	0.991	1	response to virus	P
GO:0009617	122	0.999	1	1	1	0.982	1	1	1	0.988	1	1	1	0.999	1	1	1	response to bacterium	P
GO:0009620	23	0.749	1	0.961	1	0.28	1	0.996	1	0.909	1	0.891	1	0.495	1	0.814	1	response to fungus	P
GO:0009628	422	1	1	0.996	1	0.408	1	0.866	1	1	1	0.986	1	1	1	0.999	1	response to abiotic stimulus	P
GO:0009636	27	0.782	1	0.421	1	0.863	1	0.277	1	0.539	1	0.436	1	0.792	1	0.83	1	response to toxin	P
GO:0009650	10	0.438	1	0.229	1	0.649	1	0.844	1	0.469	1	0.143	1	0.307	1	0.786	1	UV protection	P
GO:0009653	1354	1	1	1	1	1	1	1	1	1	1	1	1	1	1	1	1	morphogenesis	P
GO:0009698	45	0.862	1	0.281	1	0.492	1	0.444	1	0.905	1	0.166	1	0.927	1	0.927	1	phenylpropanoid metabolism	P
GO:0009712	44	0.838	1	0.251	1	0.451	1	0.408	1	0.889	1	0.15	1	0.922	1	0.917	1	catechol metabolism	P
GO:0009719	502	0.128	1	0.0017	0.039	0.000591	0.0125	0.00015	0.007	0.26	1	0.0187	0.565	0.999	1	0.295	1	response to endogenous stimulus	P
GO:0009725	124	0.966	1	0.981	1	0.348	1	0.285	1	0.995	1	0.997	1	0.951	1	0.993	1	response to hormone stimulus	P
GO:0009743	26	0.641	1	0.941	1	0.129	1	0.622	1	0.837	1	0.985	1	0.919	1	0.775	1	response to carbohydrate stimulus	P
GO:0009746	19	0.504	1	0.826	1	0.121	1	0.53	1	0.766	1	0.902	1	0.802	1	0.783	1	response to hexose stimulus	P
GO:0009749	19	0.504	1	0.826	1	0.121	1	0.53	1	0.766	1	0.902	1	0.802	1	0.783	1	response to glucose stimulus	P
GO:0009755	37	0.591	1	0.795	1	0.292	1	0.325	1	0.764	1	0.845	1	0.631	1	0.973	1	hormone-mediated signaling	P
GO:0009790	438	1	1	1	1	1	1	0.992	1	1	1	1	1	1	1	0.999	1	embryonic development	P
GO:0009791	69	0.861	1	0.856	1	0.516	1	0.709	1	0.975	1	0.899	1	0.516	1	0.723	1	post-embryonic development	P
GO:0009792	242	1	1	1	1	1	1	0.809	1	1	1	1	1	1	1	0.754	1	embryonic development (sensu Metazoa)	P
GO:0009798	20	0.926	1	0.998	1	0.996	1	0.984	1	0.793	1	1	1	0.999	1	0.781	1	axis specification	P
GO:0009799	34	0.76	1	0.809	1	0.395	1	0.881	1	0.851	1	0.8	1	0.757	1	0.534	1	determination of symmetry	P
GO:0009855	34	0.76	1	0.809	1	0.395	1	0.881	1	0.851	1	0.8	1	0.757	1	0.534	1	determination of bilateral symmetry	P
GO:0009880	42	1	1	1	1	1	1	1	1	1	1	1	1	0.971	1	0.986	1	embryonic pattern specification	P
GO:0009881	15	0.732	1	1	1	0.295	1	0.699	1	0.612	1	1	1	0.912	1	1	1	photoreceptor activity	F
GO:0009887	700	1	1	1	1	0.999	1	1	1	1	1	1	1	1	1	1	1	organ morphogenesis	P
GO:0009888	430	1	1	1	1	1	1	1	1	1	1	1	1	1	1	1	1	tissue development	P
GO:0009889	236	0.432	1	0.269	1	0.0609	1	0.079	1	0.508	1	0.26	1	0.994	1	0.94	1	regulation of biosynthesis	P
GO:0009890	55	0.398	1	0.376	1	0.401	1	0.135	1	0.413	1	0.627	1	0.5	1	0.29	1	negative regulation of biosynthesis	P
GO:0009891	96	0.783	1	0.881	1	0.209	1	0.569	1	0.686	1	0.775	1	1	1	0.99	1	positive regulation of biosynthesis	P
GO:0009892	510	0.741	1	0.447	1	0.125	1	0.017	0.41	0.626	1	0.706	1	1	1	0.821	1	negative regulation of metabolism	P
GO:0009893	551	1	1	1	1	0.896	1	0.962	1	0.999	1	1	1	1	1	1	1	positive regulation of metabolism	P
GO:0009894	39	0.738	1	0.82	1	0.475	1	0.455	1	0.544	1	0.881	1	1	1	0.953	1	regulation of catabolism	P
GO:0009895	12	0.961	1	0.926	1	0.27	1	0.718	1	0.991	1	0.932	1	0.977	1	0.997	1	negative regulation of catabolism	P
GO:0009897	97	0.98	1	1	1	0.569	1	1	1	0.978	1	0.998	1	0.997	1	0.934	1	external side of plasma membrane	C
GO:0009898	11	0.554	1	0.557	1	0.54	1	0.453	1	0.615	1	0.523	1	0.522	1	0.838	1	internal side of plasma membrane	C
GO:0009913	67	0.993	1	1	1	0.997	1	0.996	1	0.937	1	1	1	0.999	1	1	1	epidermal cell differentiation	P
GO:0009925	25	0.788	1	0.956	1	0.719	1	1	1	0.757	1	0.874	1	0.672	1	0.744	1	basal plasma membrane	C
GO:0009948	12	1	1	1	1	0.99	1	0.996	1	0.988	1	1	1	1	1	0.876	1	anterior/posterior axis specification	P
GO:0009952	117	1	1	1	1	1	1	1	1	1	1	1	1	1	1	0.999	1	anterior/posterior pattern formation	P
GO:0009953	45	0.883	1	1	1	0.591	1	0.95	1	0.926	1	1	1	0.798	1	0.978	1	dorsal/ventral pattern formation	P
GO:0009954	21	1	1	1	1	1	1	0.995	1	1	1	1	1	1	1	1	1	proximal/distal pattern formation	P
GO:0009966	540	1	1	1	1	0.726	1	0.805	1	1	1	1	1	1	1	1	1	regulation of signal transduction	P
GO:0009967	189	0.994	1	0.943	1	0.381	1	0.533	1	0.998	1	0.928	1	1	1	0.991	1	positive regulation of signal transduction	P
GO:0009968	128	0.991	1	0.983	1	0.994	1	0.943	1	0.94	1	0.974	1	1	1	0.968	1	negative regulation of signal transduction	P
GO:0009975	23	0.973	1	0.922	1	0.651	1	0.393	1	0.975	1	0.992	1	0.959	1	0.938	1	cyclase activity	F
GO:0009982	39	0.822	1	0.845	1	0.355	1	0.792	1	0.895	1	0.915	1	0.856	1	0.331	1	pseudouridine synthase activity	F
GO:0009986	232	0.999	1	1	1	0.732	1	0.999	1	0.999	1	1	1	0.999	1	1	1	cell surface	C
GO:0009987	12845	0.999	1	0.761	1	3.53e-09	0	1.68e-08	0	1	1	0.951	1	1	1	1	1	cellular process	P
GO:0009991	97	0.857	1	0.833	1	0.212	1	0.858	1	0.915	1	0.774	1	0.924	1	0.664	1	response to extracellular stimulus	P
GO:0009994	14	0.262	1	0.931	1	0.7	1	0.71	1	0.226	1	0.977	1	0.711	1	0.62	1	oocyte differentiation	P
GO:0010001	38	0.992	1	1	1	0.792	1	0.99	1	0.999	1	1	1	0.884	1	0.993	1	glial cell differentiation	P
GO:0010008	114	0.0253	1	0.00801	0.34	0.0258	0.497	0.000141	0.007	0.029	0.655	0.0324	1	0.773	1	0.354	1	endosome membrane	C
GO:0010033	80	0.924	1	0.957	1	0.0866	1	0.975	1	0.973	1	0.917	1	1	1	0.962	1	response to organic substance	P
GO:0010035	58	0.884	1	0.802	1	0.236	1	0.428	1	0.998	1	0.828	1	0.433	1	0.976	1	response to inorganic substance	P
GO:0010038	51	0.967	1	0.942	1	0.244	1	0.423	1	1	1	0.963	1	0.693	1	0.999	1	response to metal ion	P
GO:0010092	13	1	1	1	1	0.948	1	1	1	0.999	1	1	1	1	1	0.952	1	specification of organ identity	P
GO:0010165	11	0.215	1	0.249	1	0.522	1	0.218	1	0.197	1	0.217	1	0.17	1	0.769	1	response to X-ray	P
GO:0010181	13	0.452	1	0.825	1	0.0919	1	0.333	1	0.581	1	0.883	1	0.833	1	0.891	1	FMN binding	F
GO:0010212	12	0.583	1	0.345	1	0.298	1	0.0777	1	0.637	1	0.639	1	0.819	1	0.612	1	response to ionizing radiation	P
GO:0012501	867	0.969	1	0.872	1	0.0122	0.192	0.263	1	0.999	1	0.926	1	1	1	0.982	1	programmed cell death	P
GO:0012502	244	0.602	1	0.0864	1	0.0267	0.497	0.0147	0.281	0.93	1	0.233	1	0.721	1	0.818	1	induction of programmed cell death	P
GO:0012505	1119	0.274	1	0.00892	0.384	3.23e-07	0	8.9e-06	0.000966	0.52	1	0.0881	1	1	1	0.913	1	endomembrane system	C
GO:0012506	126	0.232	1	0.229	1	0.0133	0.192	0.0795	1	0.186	1	0.3	1	1	1	0.968	1	vesicle membrane	C
GO:0012510	13	0.0745	1	0.437	1	0.00274	0.018	0.229	1	0.109	1	0.612	1	0.945	1	0.734	1	trans-Golgi network transport vesicle membrane	C
GO:0014003	10	0.574	1	0.752	1	0.159	1	0.37	1	0.926	1	0.89	1	0.604	1	0.593	1	oligodendrocyte development	P
GO:0014013	10	1	1	1	1	1	1	1	1	1	1	1	1	0.974	1	1	1	regulation of gliogenesis	P
GO:0014020	29	0.869	1	0.695	1	0.643	1	0.478	1	0.81	1	0.775	1	0.95	1	0.663	1	primary neural tube formation	P
GO:0014031	38	1	1	1	1	0.994	1	0.992	1	1	1	1	1	0.923	1	1	1	mesenchymal cell development	P
GO:0014032	25	1	1	1	1	0.987	1	0.998	1	1	1	1	1	0.75	1	1	1	neural crest cell development	P
GO:0014033	25	1	1	1	1	0.987	1	0.998	1	1	1	1	1	0.75	1	1	1	neural crest cell differentiation	P
GO:0014065	10	0.637	1	0.794	1	0.62	1	0.899	1	0.64	1	0.604	1	0.557	1	0.984	1	phosphoinositide 3-kinase cascade	P
GO:0014069	22	1	1	1	1	0.963	1	0.991	1	1	1	1	1	1	1	1	1	postsynaptic density	C
GO:0015002	28	0.235	1	0.149	1	0.9	1	0.442	1	0.143	1	0.148	1	0.927	1	0.306	1	heme-copper terminal oxidase activity	F
GO:0015012	10	1	1	0.795	1	0.667	1	0.917	1	0.992	1	0.379	1	1	1	1	1	heparan sulfate proteoglycan biosynthesis	P
GO:0015020	22	1	1	0.998	1	1	1	1	1	1	1	0.993	1	1	1	0.755	1	glucuronosyltransferase activity	F
GO:0015026	16	0.621	1	0.531	1	0.268	1	0.785	1	0.869	1	0.418	1	0.869	1	0.631	1	coreceptor activity	F
GO:0015031	827	0.000101	0.005	1.14e-07	0.001	3.81e-08	0	2.5e-06	0	0.00161	0.043	5.66e-05	0.00229	0.829	1	0.117	1	protein transport	P
GO:0015035	14	0.985	1	0.488	1	0.994	1	0.164	1	0.866	1	0.605	1	0.973	1	0.939	1	protein disulfide oxidoreductase activity	F
GO:0015036	18	0.835	1	0.14	1	0.626	1	0.0552	1	0.758	1	0.36	1	0.925	1	0.418	1	disulfide oxidoreductase activity	F
GO:0015057	38	0.944	1	0.993	1	0.89	1	0.838	1	0.892	1	0.987	1	0.882	1	1	1	thrombin receptor activity	F
GO:0015074	15	0.856	1	0.305	1	0.695	1	0.63	1	0.917	1	0.465	1	0.629	1	0.0902	1	DNA integration	P
GO:0015075	913	1	1	0.998	1	0.618	1	0.949	1	0.999	1	0.968	1	1	1	1	1	ion transporter activity	F
GO:0015077	132	0.111	1	0.12	1	0.156	1	0.094	1	0.131	1	0.146	1	0.614	1	0.576	1	monovalent inorganic cation transporter activity	F
GO:0015078	121	0.0886	1	0.0605	1	0.219	1	0.0557	1	0.102	1	0.09	1	0.528	1	0.493	1	hydrogen ion transporter activity	F
GO:0015082	48	0.502	1	0.213	1	0.427	1	0.135	1	0.398	1	0.155	1	0.841	1	0.953	1	di-, tri-valent inorganic cation transporter activity	F
GO:0015085	13	0.427	1	0.742	1	0.297	1	0.571	1	0.348	1	0.699	1	1	1	0.996	1	calcium ion transporter activity	F
GO:0015103	46	0.475	1	0.818	1	0.236	1	0.844	1	0.699	1	0.651	1	0.296	1	0.977	1	inorganic anion transporter activity	F
GO:0015106	22	0.685	1	0.985	1	0.287	1	0.962	1	0.896	1	0.921	1	0.314	1	0.994	1	bicarbonate transporter activity	F
GO:0015108	23	0.701	1	0.977	1	0.172	1	0.889	1	0.944	1	0.907	1	0.259	1	0.996	1	chloride transporter activity	F
GO:0015114	13	0.968	1	0.662	1	0.976	1	0.903	1	0.879	1	0.504	1	0.943	1	0.795	1	phosphate transporter activity	F
GO:0015116	12	0.21	1	0.636	1	0.00812	0.157	0.397	1	0.439	1	0.594	1	0.455	1	0.99	1	sulfate transporter activity	F
GO:0015125	10	1	1	1	1	1	1	0.937	1	1	1	1	1	0.966	1	0.995	1	bile acid transporter activity	F
GO:0015144	46	0.381	1	0.55	1	0.391	1	0.121	1	0.338	1	0.706	1	0.885	1	0.852	1	carbohydrate transporter activity	F
GO:0015145	17	0.369	1	0.719	1	0.71	1	0.76	1	0.295	1	0.658	1	0.868	1	0.891	1	monosaccharide transporter activity	F
GO:0015149	16	0.277	1	0.618	1	0.634	1	0.688	1	0.22	1	0.568	1	0.817	1	0.836	1	hexose transporter activity	F
GO:0015171	54	0.798	1	0.917	1	0.735	1	0.672	1	0.678	1	0.893	1	0.993	1	1	1	amino acid transporter activity	F
GO:0015172	11	0.986	1	0.948	1	0.534	1	0.981	1	1	1	0.912	1	0.996	1	0.999	1	acidic amino acid transporter activity	F
GO:0015175	18	0.971	1	0.503	1	0.706	1	0.182	1	0.998	1	0.593	1	0.514	1	0.978	1	neutral amino acid transporter activity	F
GO:0015179	35	0.968	1	0.869	1	0.62	1	0.715	1	0.968	1	0.838	1	0.99	1	0.995	1	L-amino acid transporter activity	F
GO:0015197	24	0.981	1	0.471	1	0.591	1	0.371	1	0.983	1	0.473	1	1	1	0.739	1	peptide transporter activity	F
GO:0015198	13	0.973	1	0.992	1	0.717	1	0.885	1	0.964	1	0.998	1	0.999	1	0.728	1	oligopeptide transporter activity	F
GO:0015203	21	1	1	1	1	0.995	1	1	1	1	1	1	1	0.999	1	1	1	polyamine transporter activity	F
GO:0015232	11	0.599	1	0.481	1	0.0929	1	0.0486	1	0.957	1	0.776	1	0.458	1	0.696	1	heme transporter activity	F
GO:0015238	35	0.952	1	0.73	1	0.97	1	0.217	1	0.87	1	0.883	1	0.799	1	0.999	1	drug transporter activity	F
GO:0015247	15	0.794	1	0.654	1	0.233	1	0.873	1	0.917	1	0.485	1	0.999	1	0.925	1	aminophospholipid transporter activity	F
GO:0015248	14	0.991	1	0.589	1	0.133	1	0.757	1	1	1	0.368	1	1	1	1	1	sterol transporter activity	F
GO:0015267	505	1	1	1	1	0.883	1	0.995	1	1	1	0.985	1	1	1	1	1	channel or pore class transporter activity	F
GO:0015268	502	1	1	1	1	0.866	1	0.996	1	1	1	0.983	1	1	1	1	1	alpha-type channel activity	F
GO:0015269	14	0.898	1	0.871	1	0.579	1	0.984	1	0.97	1	0.629	1	0.832	1	0.977	1	calcium-activated potassium channel activity	F
GO:0015276	105	0.955	1	1	1	0.458	1	0.999	1	0.981	1	1	1	0.967	1	0.958	1	ligand-gated ion channel activity	F
GO:0015290	288	0.998	1	0.998	1	0.843	1	0.785	1	0.999	1	0.995	1	0.934	1	1	1	electrochemical potential-driven transporter activity	F
GO:0015291	288	0.998	1	0.998	1	0.843	1	0.785	1	0.999	1	0.995	1	0.934	1	1	1	porter activity	F
GO:0015293	166	1	1	0.998	1	0.945	1	0.834	1	1	1	0.994	1	0.889	1	1	1	symporter activity	F
GO:0015294	103	1	1	0.993	1	0.97	1	0.639	1	1	1	0.992	1	0.997	1	1	1	solute:cation symporter activity	F
GO:0015296	71	0.994	1	0.804	1	0.854	1	0.276	1	0.995	1	0.75	1	0.942	1	0.999	1	anion:cation symporter activity	F
GO:0015297	88	0.898	1	0.909	1	0.405	1	0.888	1	0.954	1	0.805	1	0.832	1	0.991	1	antiporter activity	F
GO:0015298	42	0.984	1	0.985	1	0.952	1	0.91	1	0.901	1	0.945	1	0.99	1	1	1	solute:cation antiporter activity	F
GO:0015299	42	0.984	1	0.985	1	0.952	1	0.91	1	0.901	1	0.945	1	0.99	1	1	1	solute:hydrogen antiporter activity	F
GO:0015300	47	0.92	1	0.938	1	0.516	1	0.95	1	0.919	1	0.846	1	0.954	1	0.989	1	solute:solute antiporter activity	F
GO:0015301	23	0.768	1	0.993	1	0.375	1	0.977	1	0.932	1	0.951	1	0.367	1	0.997	1	anion:anion antiporter activity	F
GO:0015307	26	0.921	1	0.921	1	0.893	1	0.862	1	0.827	1	0.828	1	0.847	1	0.998	1	drug:hydrogen antiporter activity	F
GO:0015370	99	1	1	0.991	1	0.984	1	0.59	1	1	1	0.991	1	0.994	1	1	1	solute:sodium symporter activity	F
GO:0015380	21	0.68	1	0.973	1	0.265	1	0.938	1	0.912	1	0.895	1	0.263	1	0.989	1	anion exchanger activity	F
GO:0015385	14	0.902	1	0.331	1	0.987	1	0.469	1	0.708	1	0.254	1	0.807	1	0.495	1	sodium:hydrogen antiporter activity	F
GO:0015399	111	0.248	1	0.13	1	0.0253	0.497	0.0577	1	0.445	1	0.132	1	0.766	1	0.963	1	primary active transporter activity	F
GO:0015405	111	0.248	1	0.13	1	0.0253	0.497	0.0577	1	0.445	1	0.132	1	0.766	1	0.963	1	P-P-bond-hydrolysis-driven transporter activity	F
GO:0015450	21	0.761	1	0.0652	1	0.462	1	0.0698	1	0.738	1	0.0833	1	0.927	1	0.481	1	protein translocase activity	F
GO:0015457	43	0.937	1	1	1	0.534	1	0.979	1	0.992	1	1	1	0.586	1	0.994	1	auxiliary transport protein activity	F
GO:0015459	18	0.679	1	0.976	1	0.766	1	0.602	1	0.829	1	0.975	1	0.286	1	0.992	1	potassium channel regulator activity	F
GO:0015464	29	0.739	1	0.793	1	0.455	1	0.514	1	0.714	1	0.695	1	0.867	1	0.976	1	acetylcholine receptor activity	F
GO:0015485	19	0.965	1	0.715	1	0.305	1	0.895	1	0.966	1	0.504	1	1	1	0.92	1	cholesterol binding	F
GO:0015491	21	0.811	1	0.328	1	0.882	1	0.389	1	0.638	1	0.251	1	0.852	1	0.629	1	cation:cation antiporter activity	F
GO:0015520	26	0.921	1	0.921	1	0.893	1	0.862	1	0.827	1	0.828	1	0.847	1	0.998	1	tetracycline:hydrogen antiporter activity	F
GO:0015629	313	0.265	1	0.835	1	0.00499	0.093	0.508	1	0.392	1	0.84	1	0.971	1	0.891	1	actin cytoskeleton	C
GO:0015630	430	0.107	1	0.00102	0.02	0.000101	0.00457	0.000113	0.007	0.515	1	0.00332	0.064	0.865	1	0.423	1	microtubule cytoskeleton	C
GO:0015631	73	0.0238	1	0.00225	0.051	0.0606	1	0.00898	0.112	0.0271	0.655	0.00322	0.064	0.21	1	0.137	1	tubulin binding	F
GO:0015645	11	0.178	1	0.331	1	0.00946	0.157	0.577	1	0.532	1	0.333	1	0.0702	1	0.278	1	fatty-acid ligase activity	F
GO:0015662	60	0.588	1	0.483	1	0.132	1	0.831	1	0.756	1	0.297	1	0.954	1	0.943	1	ATPase activity, coupled to transmembrane movement of ions, phosphorylative mechanism	F
GO:0015669	18	1	1	1	1	0.999	1	0.824	1	1	1	1	1	0.977	1	1	1	gas transport	P
GO:0015671	16	1	1	1	1	1	1	0.801	1	1	1	1	1	1	1	1	1	oxygen transport	P
GO:0015672	450	0.999	1	1	1	0.509	1	0.855	1	1	1	0.999	1	1	1	1	1	monovalent inorganic cation transport	P
GO:0015674	238	0.987	1	0.963	1	0.581	1	0.73	1	0.968	1	0.914	1	1	1	0.999	1	di-, tri-valent inorganic cation transport	P
GO:0015695	10	0.982	1	0.96	1	0.862	1	0.999	1	0.912	1	0.805	1	1	1	1	1	organic cation transport	P
GO:0015698	194	1	1	1	1	1	1	1	1	1	1	1	1	1	1	1	1	inorganic anion transport	P
GO:0015711	14	0.833	1	0.945	1	0.765	1	0.601	1	0.947	1	0.96	1	0.348	1	0.922	1	organic anion transport	P
GO:0015718	16	0.29	1	0.634	1	0.101	1	0.335	1	0.482	1	0.643	1	0.778	1	0.717	1	monocarboxylic acid transport	P
GO:0015749	45	0.948	1	0.575	1	0.823	1	0.558	1	0.895	1	0.459	1	1	1	0.928	1	monosaccharide transport	P
GO:0015758	44	0.94	1	0.548	1	0.789	1	0.514	1	0.893	1	0.45	1	1	1	0.911	1	glucose transport	P
GO:0015800	20	0.999	1	0.532	1	0.836	1	0.98	1	0.999	1	0.315	1	1	1	0.915	1	acidic amino acid transport	P
GO:0015804	16	0.941	1	0.457	1	0.663	1	0.135	1	0.993	1	0.609	1	0.462	1	0.936	1	neutral amino acid transport	P
GO:0015807	14	0.58	1	0.181	1	0.38	1	0.304	1	0.537	1	0.152	1	0.975	1	0.505	1	L-amino acid transport	P
GO:0015813	20	0.999	1	0.532	1	0.836	1	0.98	1	0.999	1	0.315	1	1	1	0.915	1	glutamate transport	P
GO:0015833	61	1	1	0.925	1	0.947	1	0.357	1	0.999	1	0.952	1	1	1	0.986	1	peptide transport	P
GO:0015837	91	0.702	1	0.729	1	0.316	1	0.605	1	0.611	1	0.496	1	1	1	1	1	amine transport	P
GO:0015849	144	0.928	1	0.872	1	0.45	1	0.486	1	0.923	1	0.705	1	0.994	1	1	1	organic acid transport	P
GO:0015886	10	0.452	1	0.387	1	0.0523	1	0.0283	0.542	0.921	1	0.71	1	0.387	1	0.597	1	heme transport	P
GO:0015893	30	0.929	1	0.783	1	0.885	1	0.62	1	0.872	1	0.69	1	0.785	1	0.994	1	drug transport	P
GO:0015904	26	0.921	1	0.921	1	0.893	1	0.862	1	0.827	1	0.828	1	0.847	1	0.998	1	tetracycline transport	P
GO:0015908	12	0.00707	0.137	0.0755	1	0.00424	0.035	0.0291	0.542	0.0311	0.655	0.0862	1	0.114	1	0.743	1	fatty acid transport	P
GO:0015914	18	0.775	1	0.607	1	0.131	1	0.935	1	0.888	1	0.293	1	1	1	0.994	1	phospholipid transport	P
GO:0015918	17	0.822	1	0.404	1	0.221	1	0.467	1	0.893	1	0.348	1	0.996	1	0.687	1	sterol transport	P
GO:0015923	16	0.399	1	0.194	1	0.16	1	0.438	1	0.722	1	0.139	1	0.282	1	0.517	1	mannosidase activity	F
GO:0015924	10	0.607	1	0.212	1	0.226	1	0.291	1	0.869	1	0.181	1	0.957	1	0.502	1	mannosyl-oligosaccharide mannosidase activity	F
GO:0015926	11	0.238	1	0.726	1	0.393	1	0.897	1	0.396	1	0.682	1	0.163	1	0.754	1	glucosidase activity	F
GO:0015929	12	0.179	1	0.0756	1	0.116	1	0.454	1	0.446	1	0.0618	1	0.169	1	0.501	1	hexosaminidase activity	F
GO:0015931	105	0.0329	1	4.39e-05	0.004	0.00223	0.018	2.87e-06	0	0.0953	1	0.000517	0.0102	0.624	1	0.0705	1	nucleobase, nucleoside, nucleotide and nucleic acid transport	P
GO:0015932	23	0.0719	1	0.384	1	0.0107	0.157	0.0493	1	0.499	1	0.539	1	1	1	0.752	1	nucleobase, nucleoside, nucleotide and nucleic acid transporter activity	F
GO:0015934	29	0.264	1	0.44	1	0.962	1	0.316	1	0.117	1	0.36	1	0.954	1	0.975	1	large ribosomal subunit	C
GO:0015935	39	0.15	1	0.436	1	0.988	1	0.215	1	0.0546	1	0.652	1	0.474	1	0.553	1	small ribosomal subunit	C
GO:0015936	13	0.801	1	0.752	1	0.346	1	0.669	1	0.973	1	0.722	1	0.28	1	0.886	1	coenzyme A metabolism	P
GO:0015980	204	0.0454	1	0.221	1	0.00177	0.016	0.127	1	0.107	1	0.304	1	0.947	1	0.756	1	energy derivation by oxidation of organic compounds	P
GO:0015985	19	0.0072	0.137	0.349	1	0.0384	0.587	0.442	1	0.0708	1	0.281	1	0.128	1	0.769	1	energy coupled proton transport, down electrochemical gradient	P
GO:0015986	19	0.0072	0.137	0.349	1	0.0384	0.587	0.442	1	0.0708	1	0.281	1	0.128	1	0.769	1	ATP synthesis coupled proton transport	P
GO:0015992	73	0.0287	1	0.187	1	0.00934	0.157	0.0641	1	0.115	1	0.232	1	0.652	1	0.851	1	proton transport	P
GO:0016010	17	0.992	1	0.802	1	0.722	1	0.849	1	0.999	1	0.892	1	0.974	1	0.327	1	dystrophin-associated glycoprotein complex	C
GO:0016020	6912	1	1	1	1	0.322	1	0.787	1	1	1	1	1	1	1	1	1	membrane	C
GO:0016021	5021	1	1	1	1	0.925	1	0.992	1	1	1	1	1	1	1	1	1	integral to membrane	C
GO:0016023	415	0.664	1	0.512	1	0.163	1	0.151	1	0.536	1	0.551	1	1	1	0.927	1	cytoplasmic membrane-bound vesicle	C
GO:0016032	72	0.936	1	0.981	1	0.786	1	0.706	1	0.793	1	0.986	1	1	1	0.922	1	viral life cycle	P
GO:0016042	145	0.56	1	0.389	1	0.0806	1	0.451	1	0.768	1	0.38	1	0.631	1	0.799	1	lipid catabolism	P
GO:0016043	2253	0.188	1	0.0243	1	2.1e-10	0	4.99e-06	0.000832	0.664	1	0.206	1	1	1	0.966	1	cell organization and biogenesis	P
GO:0016044	123	0.282	1	0.233	1	0.233	1	0.169	1	0.319	1	0.196	1	0.722	1	0.826	1	membrane organization and biogenesis	P
GO:0016049	204	0.998	1	1	1	0.674	1	0.57	1	0.998	1	1	1	0.999	1	1	1	cell growth	P
GO:0016051	136	0.55	1	0.74	1	0.118	1	0.279	1	0.528	1	0.645	1	0.998	1	0.998	1	carbohydrate biosynthesis	P
GO:0016052	113	0.0212	1	0.0267	1	0.00723	0.157	0.0773	1	0.0648	1	0.052	1	0.474	1	0.112	1	carbohydrate catabolism	P
GO:0016053	93	0.718	1	0.74	1	0.344	1	0.265	1	0.729	1	0.834	1	0.995	1	0.98	1	organic acid biosynthesis	P
GO:0016054	10	0.00667	0.137	0.0132	0.384	1.42e-05	0.000971	0.331	1	0.0321	0.655	0.0139	0.565	0.315	1	0.113	1	organic acid catabolism	P
GO:0016055	122	0.988	1	0.997	1	0.822	1	0.924	1	0.991	1	0.999	1	0.984	1	0.871	1	Wnt receptor signaling pathway	P
GO:0016064	114	0.997	1	0.999	1	0.896	1	0.957	1	0.994	1	0.995	1	0.999	1	1	1	immunoglobulin mediated immune response	P
GO:0016068	46	0.991	1	0.999	1	0.845	1	0.912	1	0.995	1	0.999	1	0.96	1	0.992	1	type I hypersensitivity	P
GO:0016070	637	6.27e-07	0.000125	2.12e-14	0	3.33e-09	0	1.86e-08	0	0.000593	0.0049	1.03e-10	0.000105	0.128	1	0.0181	0.177	RNA metabolism	P
GO:0016071	342	7.88e-05	0.005	2.88e-09	0.001	3.07e-05	0.00457	2.45e-08	0	0.0076	0.202	5.96e-07	0.000222	0.0995	1	0.0157	0.138	mRNA metabolism	P
GO:0016072	74	0.0811	1	0.0344	1	0.0208	0.236	0.0237	0.41	0.163	1	0.111	1	0.556	1	0.891	1	rRNA metabolism	P
GO:0016073	12	0.126	1	0.0561	1	0.0263	0.497	0.0242	0.41	0.429	1	0.0698	1	0.164	1	0.73	1	snRNA metabolism	P
GO:0016079	13	0.925	1	0.766	1	0.75	1	0.244	1	0.899	1	0.956	1	1	1	1	1	synaptic vesicle exocytosis	P
GO:0016089	45	0.862	1	0.281	1	0.492	1	0.444	1	0.905	1	0.166	1	0.927	1	0.927	1	aromatic amino acid family biosynthesis, shikimate pathway	P
GO:0016125	95	0.637	1	0.404	1	0.0373	0.587	0.154	1	0.832	1	0.688	1	0.95	1	0.421	1	sterol metabolism	P
GO:0016126	34	0.563	1	0.217	1	0.212	1	0.123	1	0.635	1	0.525	1	0.784	1	0.327	1	sterol biosynthesis	P
GO:0016127	10	0.174	1	0.291	1	0.0752	1	0.819	1	0.479	1	0.276	1	0.909	1	0.381	1	sterol catabolism	P
GO:0016180	12	0.126	1	0.0561	1	0.0263	0.497	0.0242	0.41	0.429	1	0.0698	1	0.164	1	0.73	1	snRNA processing	P
GO:0016192	546	0.000251	0.011	0.000309	0.00826	6.23e-07	0.000848	4.03e-06	0.000832	0.00215	0.043	0.00929	0.143	0.857	1	0.153	1	vesicle-mediated transport	P
GO:0016197	45	0.442	1	0.169	1	0.0402	0.587	0.0878	1	0.67	1	0.149	1	0.988	1	0.661	1	endosome transport	P
GO:0016202	15	0.406	1	0.794	1	0.189	1	1	1	0.478	1	0.708	1	0.998	1	0.501	1	regulation of striated muscle development	P
GO:0016208	25	0.937	1	0.792	1	0.716	1	0.735	1	0.961	1	0.717	1	0.934	1	0.858	1	AMP binding	F
GO:0016209	61	0.612	1	0.985	1	0.15	1	0.688	1	0.821	1	0.987	1	0.571	1	0.992	1	antioxidant activity	F
GO:0016229	38	0.963	1	0.957	1	0.54	1	0.396	1	0.994	1	0.941	1	0.996	1	1	1	steroid dehydrogenase activity	F
GO:0016236	14	0.0871	1	0.0485	1	0.113	1	0.366	1	0.13	1	0.0222	0.769	0.328	1	0.339	1	macroautophagy	P
GO:0016247	40	0.876	1	1	1	0.408	1	0.966	1	0.98	1	1	1	0.527	1	0.986	1	channel regulator activity	F
GO:0016251	36	0.0383	1	5.03e-05	0.004	0.0259	0.497	0.00125	0.013	0.05	1	0.000112	0.00229	0.514	1	0.00375	0.066	general RNA polymerase II transcription factor activity	F
GO:0016254	16	0.758	1	0.297	1	0.961	1	0.262	1	0.497	1	0.392	1	0.963	1	0.395	1	preassembly of GPI anchor in ER membrane	P
GO:0016265	919	0.977	1	0.875	1	0.0112	0.157	0.298	1	1	1	0.929	1	0.999	1	0.959	1	death	P
GO:0016272	12	0.824	1	0.636	1	0.544	1	0.998	1	0.725	1	0.271	1	0.985	1	1	1	prefoldin complex	C
GO:0016278	29	0.035	1	0.0391	1	0.00711	0.157	0.0769	1	0.0565	1	0.121	1	0.574	1	0.024	0.252	lysine N-methyltransferase activity	F
GO:0016279	29	0.035	1	0.0391	1	0.00711	0.157	0.0769	1	0.0565	1	0.121	1	0.574	1	0.024	0.252	protein-lysine N-methyltransferase activity	F
GO:0016282	16	0.0061	0.137	0.00134	0.039	0.0111	0.157	0.0188	0.41	0.08	1	0.00548	0.074	0.0952	1	0.00563	0.066	eukaryotic 43S preinitiation complex	C
GO:0016284	12	0.949	1	0.739	1	0.962	1	0.511	1	0.933	1	0.726	1	0.886	1	0.919	1	alanine aminopeptidase activity	F
GO:0016289	15	0.022	1	0.00103	0.02	0.367	1	0.104	1	0.0251	0.655	0.000225	0.007	0.167	1	1	1	CoA hydrolase activity	F
GO:0016298	107	0.726	1	0.98	1	0.187	1	0.68	1	0.908	1	0.996	1	0.564	1	0.778	1	lipase activity	F
GO:0016301	902	0.683	1	0.313	1	0.000232	0.006	0.000241	0.007	0.814	1	0.571	1	1	1	0.999	1	kinase activity	F
GO:0016303	11	0.14	1	0.158	1	0.0183	0.236	0.148	1	0.262	1	0.174	1	0.872	1	0.719	1	phosphatidylinositol 3-kinase activity	F
GO:0016307	11	0.202	1	0.432	1	0.0375	0.587	0.742	1	0.299	1	0.332	1	0.445	1	0.825	1	phosphatidylinositol phosphate kinase activity	F
GO:0016310	851	0.131	1	0.358	1	5.31e-05	0.00457	0.0213	0.41	0.311	1	0.383	1	0.997	1	0.988	1	phosphorylation	P
GO:0016311	161	0.746	1	0.214	1	0.0271	0.497	0.024	0.41	0.951	1	0.58	1	0.978	1	0.321	1	dephosphorylation	P
GO:0016323	133	0.792	1	0.989	1	0.245	1	0.822	1	0.614	1	0.961	1	1	1	1	1	basolateral plasma membrane	C
GO:0016324	96	0.945	1	0.986	1	0.462	1	0.629	1	0.964	1	0.984	1	0.953	1	1	1	apical plasma membrane	C
GO:0016327	100	0.325	1	0.81	1	0.282	1	0.439	1	0.253	1	0.654	1	0.796	1	1	1	apicolateral plasma membrane	C
GO:0016328	12	0.518	1	0.497	1	0.43	1	0.207	1	0.581	1	0.606	1	0.627	1	0.505	1	lateral plasma membrane	C
GO:0016331	54	0.993	1	0.959	1	0.95	1	0.838	1	0.98	1	0.964	1	0.996	1	0.915	1	morphogenesis of embryonic epithelium	P
GO:0016337	230	1	1	1	1	0.985	1	1	1	1	1	1	1	1	1	1	1	cell-cell adhesion	P
GO:0016338	16	0.235	1	1	1	0.278	1	0.997	1	0.251	1	1	1	0.36	1	1	1	calcium-independent cell-cell adhesion	P
GO:0016339	12	1	1	1	1	0.994	1	1	1	1	1	1	1	1	1	1	1	calcium-dependent cell-cell adhesion	P
GO:0016358	40	0.999	1	0.915	1	0.596	1	0.937	1	1	1	0.776	1	1	1	0.999	1	dendrite development	P
GO:0016363	46	0.144	1	0.00654	0.15	0.08	1	0.000995	0.0111	0.286	1	0.062	1	0.121	1	0.125	1	nuclear matrix	C
GO:0016407	69	0.544	1	0.307	1	0.104	1	0.167	1	0.761	1	0.292	1	0.738	1	0.811	1	acetyltransferase activity	F
GO:0016408	12	0.2	1	0.19	1	0.0779	1	0.113	1	0.455	1	0.319	1	0.235	1	0.201	1	C-acyltransferase activity	F
GO:0016409	14	0.388	1	0.297	1	0.328	1	0.172	1	0.538	1	0.235	1	0.199	1	0.869	1	palmitoyltransferase activity	F
GO:0016410	70	0.622	1	0.341	1	0.0466	0.868	0.0751	1	0.787	1	0.393	1	0.934	1	0.801	1	N-acyltransferase activity	F
GO:0016411	18	0.888	1	0.876	1	0.871	1	0.994	1	0.751	1	0.614	1	1	1	1	1	acylglycerol O-acyltransferase activity	F
GO:0016439	33	0.996	1	0.846	1	0.965	1	0.604	1	0.992	1	0.963	1	1	1	0.358	1	tRNA-pseudouridine synthase activity	F
GO:0016444	26	0.316	1	0.208	1	0.529	1	0.498	1	0.167	1	0.151	1	0.903	1	0.496	1	somatic cell DNA recombination	P
GO:0016445	29	0.32	1	0.348	1	0.481	1	0.481	1	0.18	1	0.282	1	0.854	1	0.674	1	somatic diversification of immunoglobulins	P
GO:0016447	26	0.316	1	0.208	1	0.529	1	0.498	1	0.167	1	0.151	1	0.903	1	0.496	1	somatic recombination of immunoglobulin gene segments	P
GO:0016455	16	0.364	1	0.0664	1	0.482	1	0.165	1	0.348	1	0.0586	1	0.411	1	0.0745	1	RNA polymerase II transcription mediator activity	F
GO:0016458	32	0.0817	1	0.0199	0.924	0.184	1	0.0336	0.542	0.0791	1	0.0154	0.565	0.335	1	0.275	1	gene silencing	P
GO:0016459	59	0.23	1	1	1	0.0815	1	0.963	1	0.302	1	0.999	1	0.741	1	1	1	myosin complex	C
GO:0016462	779	0.0711	1	0.0026	0.051	4.94e-06	0.000971	0.000399	0.00717	0.64	1	0.0554	1	0.887	1	0.555	1	pyrophosphatase activity	F
GO:0016469	50	0.0438	1	0.106	1	0.0221	0.263	0.0465	1	0.163	1	0.179	1	0.428	1	0.547	1	proton-transporting two-sector ATPase complex	C
GO:0016477	347	1	1	1	1	1	1	0.99	1	1	1	1	1	1	1	1	1	cell migration	P
GO:0016478	12	0.187	1	0.032	1	0.288	1	0.00734	0.081	0.173	1	0.065	1	0.669	1	0.166	1	negative regulation of translation	P
GO:0016481	349	0.843	1	0.511	1	0.374	1	0.0479	1	0.724	1	0.695	1	1	1	0.877	1	negative regulation of transcription	P
GO:0016485	106	0.413	1	0.284	1	0.299	1	0.135	1	0.225	1	0.29	1	1	1	0.821	1	protein processing	P
GO:0016491	874	0.257	1	0.668	1	0.0832	1	0.0225	0.41	0.447	1	0.674	1	0.609	1	1	1	oxidoreductase activity	F
GO:0016493	40	0.981	1	0.982	1	0.935	1	0.523	1	0.882	1	0.968	1	1	1	1	1	C-C chemokine receptor activity	F
GO:0016494	35	0.998	1	0.984	1	0.982	1	0.526	1	0.981	1	0.974	1	0.954	1	1	1	C-X-C chemokine receptor activity	F
GO:0016500	27	1	1	1	1	1	1	0.999	1	1	1	1	1	0.755	1	0.944	1	protein-hormone receptor activity	F
GO:0016502	107	1	1	1	1	1	1	0.569	1	0.991	1	1	1	1	1	1	1	nucleotide receptor activity	F
GO:0016504	21	0.191	1	0.406	1	0.353	1	0.407	1	0.199	1	0.559	1	0.146	1	0.0893	1	protease activator activity	F
GO:0016505	17	0.16	1	0.277	1	0.246	1	0.182	1	0.191	1	0.403	1	0.122	1	0.169	1	apoptotic protease activator activity	F
GO:0016525	20	0.998	1	0.971	1	1	1	0.999	1	0.955	1	0.87	1	0.981	1	0.995	1	negative regulation of angiogenesis	P
GO:0016527	10	0.802	1	0.949	1	0.54	1	0.997	1	0.833	1	0.851	1	0.996	1	0.998	1	brain-specific angiogenesis inhibitor activity	F
GO:0016528	17	0.676	1	0.734	1	0.161	1	0.288	1	0.903	1	0.887	1	0.987	1	0.753	1	sarcoplasm	C
GO:0016529	14	0.486	1	0.435	1	0.0983	1	0.189	1	0.762	1	0.69	1	0.965	1	0.575	1	sarcoplasmic reticulum	C
GO:0016540	62	0.274	1	0.287	1	0.288	1	0.232	1	0.174	1	0.239	1	0.994	1	0.845	1	protein autoprocessing	P
GO:0016558	10	0.334	1	0.662	1	0.273	1	0.416	1	0.42	1	0.893	1	0.645	1	0.262	1	protein import into peroxisome matrix	P
GO:0016563	327	0.93	1	0.372	1	0.084	1	0.0253	0.41	0.992	1	0.655	1	0.999	1	0.651	1	transcriptional activator activity	F
GO:0016564	239	0.998	1	0.831	1	0.964	1	0.267	1	0.983	1	0.853	1	1	1	0.988	1	transcriptional repressor activity	F
GO:0016566	18	0.948	1	0.855	1	0.852	1	0.977	1	0.647	1	0.618	1	1	1	1	1	specific transcriptional repressor activity	F
GO:0016567	103	0.211	1	0.0327	1	0.032	0.587	0.00228	0.027	0.42	1	0.0801	1	0.482	1	0.275	1	protein ubiquitination	P
GO:0016568	214	0.00202	0.049	2.2e-06	0.00141	5e-06	0.000971	2.7e-05	0.00391	0.0221	0.478	3.22e-05	0.00229	0.917	1	0.023	0.252	chromatin modification	P
GO:0016569	58	0.166	1	0.0255	1	0.0192	0.236	0.0055	0.081	0.396	1	0.108	1	0.889	1	0.0956	1	covalent chromatin modification	P
GO:0016570	55	0.204	1	0.079	1	0.0257	0.497	0.0208	0.41	0.479	1	0.231	1	0.852	1	0.161	1	histone modification	P
GO:0016571	15	0.532	1	0.037	1	0.73	1	0.0146	0.281	0.479	1	0.175	1	0.532	1	0.0124	0.138	histone methylation	P
GO:0016573	14	0.0842	1	0.264	1	0.258	1	0.297	1	0.0695	1	0.307	1	0.43	1	0.495	1	histone acetylation	P
GO:0016575	14	0.0589	1	0.33	1	0.00848	0.157	0.442	1	0.19	1	0.25	1	0.88	1	0.921	1	histone deacetylation	P
GO:0016585	30	0.0156	0.31	0.00741	0.34	0.0811	1	0.163	1	0.0133	0.301	0.00526	0.074	0.379	1	0.25	1	chromatin remodeling complex	C
GO:0016591	96	0.0101	0.177	0.000123	0.004	0.00227	0.018	0.0219	0.41	0.0724	1	3.23e-05	0.00229	0.419	1	0.282	1	DNA-directed RNA polymerase II, holoenzyme	C
GO:0016597	19	0.945	1	0.829	1	0.577	1	0.825	1	0.96	1	0.92	1	0.911	1	0.419	1	amino acid binding	F
GO:0016599	19	0.125	1	0.841	1	0.204	1	0.712	1	0.155	1	0.923	1	0.505	1	0.465	1	caveolar membrane	C
GO:0016600	12	0.0555	1	0.912	1	0.164	1	0.745	1	0.0692	1	0.974	1	0.471	1	0.526	1	flotillin complex	C
GO:0016601	14	0.297	1	0.686	1	0.286	1	0.634	1	0.262	1	0.639	1	0.556	1	0.741	1	Rac protein signal transduction	P
GO:0016604	124	0.00837	0.156	4.95e-05	0.004	0.00374	0.035	0.000594	0.00717	0.0779	1	0.000328	0.0102	0.105	1	0.02	0.177	nuclear body	C
GO:0016605	23	0.0599	1	0.0436	1	0.0102	0.157	0.114	1	0.0909	1	0.0378	1	0.579	1	0.292	1	PML body	C
GO:0016607	85	0.118	1	0.00973	0.384	0.0287	0.565	0.00935	0.112	0.443	1	0.0232	0.769	0.126	1	0.125	1	nuclear speck	C
GO:0016614	151	0.898	1	0.87	1	0.272	1	0.298	1	0.983	1	0.77	1	0.919	1	1	1	oxidoreductase activity, acting on CH-OH group of donors	F
GO:0016616	134	0.833	1	0.944	1	0.268	1	0.522	1	0.96	1	0.846	1	0.831	1	1	1	oxidoreductase activity, acting on the CH-OH group of donors, NAD or NADP as acceptor	F
GO:0016620	23	0.112	1	0.263	1	0.204	1	0.0765	1	0.0799	1	0.239	1	0.36	1	1	1	oxidoreductase activity, acting on the aldehyde or oxo group of donors, NAD or NADP as acceptor	F
GO:0016627	93	0.196	1	0.0712	1	0.166	1	0.341	1	0.217	1	0.0395	1	0.875	1	0.662	1	oxidoreductase activity, acting on the CH-CH group of donors	F
GO:0016628	59	0.688	1	0.302	1	0.374	1	0.315	1	0.769	1	0.228	1	0.792	1	0.896	1	oxidoreductase activity, acting on the CH-CH group of donors, NAD or NADP as acceptor	F
GO:0016634	10	0.619	1	0.456	1	0.512	1	0.989	1	0.676	1	0.363	1	0.511	1	0.331	1	oxidoreductase activity, acting on the CH-CH group of donors, oxygen as acceptor	F
GO:0016638	16	0.86	1	0.691	1	0.458	1	0.295	1	0.91	1	0.804	1	0.813	1	0.965	1	oxidoreductase activity, acting on the CH-NH2 group of donors	F
GO:0016641	14	0.9	1	0.867	1	0.62	1	0.344	1	0.911	1	0.962	1	0.849	1	0.994	1	oxidoreductase activity, acting on the CH-NH2 group of donors, oxygen as acceptor	F
GO:0016645	29	0.286	1	0.371	1	0.175	1	0.0698	1	0.516	1	0.42	1	0.672	1	0.986	1	oxidoreductase activity, acting on the CH-NH group of donors	F
GO:0016646	19	0.629	1	0.438	1	0.557	1	0.195	1	0.901	1	0.478	1	0.46	1	0.946	1	oxidoreductase activity, acting on the CH-NH group of donors, NAD or NADP as acceptor	F
GO:0016651	74	0.0468	1	0.0449	1	0.371	1	0.0266	0.41	0.0185	0.381	0.093	1	0.496	1	0.344	1	oxidoreductase activity, acting on NADH or NADPH	F
GO:0016652	10	0.318	1	0.291	1	0.563	1	0.0275	0.41	0.346	1	0.371	1	0.19	1	0.995	1	oxidoreductase activity, acting on NADH or NADPH, NAD or NADP as acceptor	F
GO:0016655	49	0.0179	0.562	0.00878	0.384	0.283	1	0.0202	0.41	0.00344	0.0624	0.0194	0.565	0.73	1	0.194	1	oxidoreductase activity, acting on NADH or NADPH, quinone or similar compound as acceptor	F
GO:0016667	20	0.884	1	0.102	1	0.365	1	0.073	1	0.898	1	0.141	1	0.992	1	0.357	1	oxidoreductase activity, acting on sulfur group of donors	F
GO:0016675	28	0.235	1	0.149	1	0.9	1	0.442	1	0.143	1	0.148	1	0.927	1	0.306	1	oxidoreductase activity, acting on heme group of donors	F
GO:0016676	28	0.235	1	0.149	1	0.9	1	0.442	1	0.143	1	0.148	1	0.927	1	0.306	1	oxidoreductase activity, acting on heme group of donors, oxygen as acceptor	F
GO:0016679	12	0.133	1	0.225	1	0.298	1	0.171	1	0.215	1	0.346	1	0.0838	1	0.344	1	oxidoreductase activity, acting on diphenols and related substances as donors	F
GO:0016681	12	0.133	1	0.225	1	0.298	1	0.171	1	0.215	1	0.346	1	0.0838	1	0.344	1	oxidoreductase activity, acting on diphenols and related substances as donors, cytochrome as acceptor	F
GO:0016684	47	0.434	1	1	1	0.198	1	0.908	1	0.61	1	0.999	1	0.513	1	0.999	1	oxidoreductase activity, acting on peroxide as acceptor	F
GO:0016701	61	0.175	1	0.488	1	0.103	1	0.52	1	0.17	1	0.477	1	0.998	1	0.624	1	oxidoreductase activity, acting on single donors with incorporation of molecular oxygen	F
GO:0016702	60	0.145	1	0.422	1	0.0897	1	0.474	1	0.144	1	0.416	1	0.996	1	0.587	1	oxidoreductase activity, acting on single donors with incorporation of molecular oxygen, incorporation of two atoms of oxygen	F
GO:0016705	135	0.936	1	1	1	0.873	1	0.926	1	0.861	1	1	1	0.986	1	0.997	1	oxidoreductase activity, acting on paired donors, with incorporation or reduction of molecular oxygen	F
GO:0016706	26	0.0553	1	0.345	1	0.124	1	0.14	1	0.0409	1	0.485	1	0.876	1	0.447	1	oxidoreductase activity, acting on paired donors, with incorporation or reduction of molecular oxygen, 2-oxoglutarate as one donor, and incorporation of one atom each of oxygen into both donors	F
GO:0016709	34	0.683	1	0.691	1	0.73	1	0.454	1	0.732	1	0.659	1	0.314	1	0.89	1	oxidoreductase activity, acting on paired donors, with incorporation or reduction of molecular oxygen, NAD or NADH as one donor, and incorporation of one atom of oxygen	F
GO:0016712	42	1	1	1	1	1	1	1	1	1	1	1	1	1	1	1	1	oxidoreductase activity, acting on paired donors, with incorporation or reduction of molecular oxygen, reduced flavin or flavoprotein as one donor, and incorporation of one atom of oxygen	F
GO:0016740	1836	0.0492	1	0.000905	0.02	5.66e-12	0	8.82e-10	0	0.465	1	0.0485	1	1	1	0.834	1	transferase activity	F
GO:0016741	185	0.000367	0.016	9.55e-05	0.004	0.000372	0.00718	8.73e-05	0.00391	0.0076	0.202	0.00232	0.051	0.254	1	0.0469	0.81	transferase activity, transferring one-carbon groups	F
GO:0016746	203	0.17	1	0.127	1	0.00294	0.035	0.0259	0.41	0.586	1	0.382	1	0.961	1	0.274	1	transferase activity, transferring acyl groups	F
GO:0016747	189	0.173	1	0.0661	1	0.00316	0.035	0.0119	0.127	0.653	1	0.226	1	0.922	1	0.351	1	transferase activity, transferring groups other than amino-acyl groups	F
GO:0016755	24	0.378	1	0.955	1	0.0417	0.587	0.969	1	0.522	1	0.993	1	0.998	1	0.224	1	transferase activity, transferring amino-acyl groups	F
GO:0016757	250	0.95	1	0.364	1	0.0727	1	0.0594	1	0.983	1	0.429	1	1	1	0.962	1	transferase activity, transferring glycosyl groups	F
GO:0016758	167	0.981	1	0.445	1	0.144	1	0.0818	1	0.994	1	0.537	1	1	1	0.969	1	transferase activity, transferring hexosyl groups	F
GO:0016763	49	0.134	1	0.226	1	0.0576	1	0.0437	1	0.338	1	0.309	1	0.822	1	0.513	1	transferase activity, transferring pentosyl groups	F
GO:0016765	48	0.378	1	0.966	1	0.369	1	0.1	1	0.553	1	0.992	1	0.286	1	1	1	transferase activity, transferring alkyl or aryl (other than methyl) groups	F
GO:0016769	31	0.0334	1	0.0923	1	0.0153	0.192	0.0396	1	0.142	1	0.187	1	0.469	1	0.244	1	transferase activity, transferring nitrogenous groups	F
GO:0016772	1053	0.305	1	0.0286	1	3.91e-06	0.000971	1.79e-05	0.002	0.515	1	0.183	1	1	1	0.864	1	transferase activity, transferring phosphorus-containing groups	F
GO:0016773	808	0.599	1	0.499	1	0.000259	0.006	0.00199	0.027	0.752	1	0.651	1	1	1	1	1	phosphotransferase activity, alcohol group as acceptor	F
GO:0016775	18	0.514	1	0.998	1	0.149	1	0.995	1	0.762	1	0.988	1	0.425	1	0.995	1	phosphotransferase activity, nitrogenous group as acceptor	F
GO:0016776	38	0.199	1	0.0925	1	0.0346	0.587	0.00263	0.056	0.319	1	0.346	1	0.755	1	0.566	1	phosphotransferase activity, phosphate group as acceptor	F
GO:0016779	128	0.0302	1	0.000719	0.019	0.0049	0.093	0.0226	0.41	0.111	1	0.0139	0.565	0.742	1	0.0298	0.252	nucleotidyltransferase activity	F
GO:0016780	17	0.819	1	0.245	1	0.274	1	0.0465	1	0.859	1	0.63	1	0.995	1	0.482	1	phosphotransferase activity, for other substituted phosphate groups	F
GO:0016782	52	0.548	1	0.388	1	0.238	1	0.357	1	0.441	1	0.292	1	0.971	1	0.839	1	transferase activity, transferring sulfur-containing groups	F
GO:0016787	2476	0.0642	1	0.0626	1	2.35e-10	0	1.58e-07	0	0.707	1	0.527	1	0.964	1	0.99	1	hydrolase activity	F
GO:0016788	703	0.0586	1	0.0376	1	2.49e-05	0.001	2.5e-05	0.00391	0.366	1	0.298	1	0.753	1	0.941	1	hydrolase activity, acting on ester bonds	F
GO:0016789	147	0.136	1	0.902	1	0.0497	0.868	0.258	1	0.41	1	0.956	1	0.128	1	0.962	1	carboxylic ester hydrolase activity	F
GO:0016790	89	0.0711	1	7.51e-05	0.004	0.0549	1	0.000114	0.007	0.0886	1	0.000605	0.0102	0.702	1	0.202	1	thiolester hydrolase activity	F
GO:0016791	266	0.309	1	0.0899	1	0.00412	0.035	0.00111	0.013	0.703	1	0.376	1	0.903	1	0.495	1	phosphoric monoester hydrolase activity	F
GO:0016796	21	0.598	1	0.174	1	0.159	1	0.275	1	0.664	1	0.108	1	0.906	1	0.997	1	exonuclease activity, active with either ribo- or deoxyribonucleic acids and producing 5'-phosphomonoesters	F
GO:0016798	157	0.214	1	0.0757	1	0.121	1	0.0547	1	0.462	1	0.112	1	0.304	1	0.779	1	hydrolase activity, acting on glycosyl bonds	F
GO:0016799	20	0.394	1	0.191	1	0.278	1	0.456	1	0.279	1	0.0877	1	0.978	1	0.988	1	hydrolase activity, hydrolyzing N-glycosyl compounds	F
GO:0016805	13	0.449	1	0.667	1	0.212	1	0.816	1	0.512	1	0.512	1	0.895	1	0.707	1	dipeptidase activity	F
GO:0016806	12	0.266	1	0.416	1	0.301	1	0.473	1	0.297	1	0.329	1	0.493	1	0.595	1	dipeptidyl-peptidase and tripeptidyl-peptidase activity	F
GO:0016810	123	0.0285	1	0.338	1	0.00366	0.035	0.761	1	0.0758	1	0.157	1	0.52	1	0.706	1	hydrolase activity, acting on carbon-nitrogen (but not peptide) bonds	F
GO:0016811	58	0.0152	0.31	0.179	1	0.0139	0.192	0.855	1	0.0384	1	0.0706	1	0.17	1	0.426	1	hydrolase activity, acting on carbon-nitrogen (but not peptide) bonds, in linear amides	F
GO:0016812	11	0.377	1	0.994	1	0.0748	1	0.551	1	0.468	1	0.995	1	1	1	0.991	1	hydrolase activity, acting on carbon-nitrogen (but not peptide) bonds, in cyclic amides	F
GO:0016813	15	0.471	1	0.84	1	0.525	1	0.388	1	0.327	1	0.878	1	0.946	1	0.949	1	hydrolase activity, acting on carbon-nitrogen (but not peptide) bonds, in linear amidines	F
GO:0016814	32	0.184	1	0.132	1	0.207	1	0.447	1	0.251	1	0.0731	1	0.346	1	0.404	1	hydrolase activity, acting on carbon-nitrogen (but not peptide) bonds, in cyclic amidines	F
GO:0016817	785	0.0599	1	0.00162	0.039	4.25e-06	0.000971	0.000353	0.007	0.603	1	0.0368	1	0.879	1	0.54	1	hydrolase activity, acting on acid anhydrides	F
GO:0016818	783	0.0706	1	0.0019	0.039	5.5e-06	0.000971	0.000387	0.00717	0.634	1	0.042	1	0.882	1	0.539	1	hydrolase activity, acting on acid anhydrides, in phosphorus-containing anhydrides	F
GO:0016820	140	0.31	1	0.788	1	0.0156	0.192	0.243	1	0.515	1	0.74	1	0.894	1	1	1	hydrolase activity, acting on acid anhydrides, catalyzing transmembrane movement of substances	F
GO:0016829	167	0.211	1	0.803	1	0.00122	0.0125	0.49	1	0.331	1	0.814	1	0.995	1	0.976	1	lyase activity	F
GO:0016830	45	0.431	1	0.529	1	0.028	0.497	0.316	1	0.519	1	0.539	1	1	1	0.873	1	carbon-carbon lyase activity	F
GO:0016831	33	0.615	1	0.451	1	0.0594	1	0.306	1	0.668	1	0.477	1	1	1	0.824	1	carboxy-lyase activity	F
GO:0016835	59	0.129	1	0.724	1	0.127	1	0.816	1	0.148	1	0.551	1	0.428	1	0.96	1	carbon-oxygen lyase activity	F
GO:0016836	50	0.103	1	0.555	1	0.0738	1	0.792	1	0.126	1	0.408	1	0.368	1	0.82	1	hydro-lyase activity	F
GO:0016846	16	0.283	1	0.746	1	0.00993	0.157	0.469	1	0.504	1	0.756	1	0.809	1	0.76	1	carbon-sulfur lyase activity	F
GO:0016849	21	0.999	1	1	1	0.971	1	0.95	1	0.992	1	1	1	0.99	1	1	1	phosphorus-oxygen lyase activity	F
GO:0016853	186	0.192	1	0.123	1	0.158	1	0.0373	1	0.401	1	0.249	1	0.221	1	0.413	1	isomerase activity	F
GO:0016854	17	0.304	1	0.258	1	0.313	1	0.0464	1	0.248	1	0.647	1	0.687	1	0.273	1	racemase and epimerase activity	F
GO:0016857	10	0.246	1	0.141	1	0.169	1	0.0662	1	0.25	1	0.327	1	0.849	1	0.292	1	racemase and epimerase activity, acting on carbohydrates and derivatives	F
GO:0016859	39	0.0945	1	0.0705	1	0.104	1	0.113	1	0.342	1	0.107	1	0.161	1	0.5	1	cis-trans isomerase activity	F
GO:0016860	40	0.265	1	0.163	1	0.585	1	0.107	1	0.117	1	0.396	1	0.602	1	0.284	1	intramolecular oxidoreductase activity	F
GO:0016861	11	0.738	1	0.814	1	0.19	1	0.803	1	0.734	1	0.616	1	1	1	0.96	1	intramolecular oxidoreductase activity, interconverting aldoses and ketoses	F
GO:0016862	10	0.299	1	0.362	1	0.453	1	0.396	1	0.28	1	0.255	1	0.168	1	0.878	1	intramolecular oxidoreductase activity, interconverting keto- and enol-groups	F
GO:0016863	12	0.209	1	0.139	1	0.815	1	0.161	1	0.0842	1	0.938	1	0.355	1	0.0961	1	intramolecular oxidoreductase activity, transposing C=C bonds	F
GO:0016866	55	0.902	1	0.915	1	0.562	1	0.768	1	0.905	1	0.961	1	0.937	1	0.441	1	intramolecular transferase activity	F
GO:0016868	14	0.795	1	0.8	1	0.857	1	0.507	1	0.558	1	0.814	1	0.999	1	0.697	1	intramolecular transferase activity, phosphotransferases	F
GO:0016874	424	0.00219	0.049	2.89e-06	0.00141	7.47e-07	0.000848	3.57e-07	0	0.0553	1	0.000472	0.0102	0.367	1	0.0213	0.177	ligase activity	F
GO:0016875	76	0.00206	0.049	0.00376	0.063	0.0116	0.157	0.198	1	0.00382	0.0624	0.00659	0.105	0.126	1	0.025	0.252	ligase activity, forming carbon-oxygen bonds	F
GO:0016876	76	0.00206	0.049	0.00376	0.063	0.0116	0.157	0.198	1	0.00382	0.0624	0.00659	0.105	0.126	1	0.025	0.252	ligase activity, forming aminoacyl-tRNA and related compounds	F
GO:0016877	27	0.651	1	0.68	1	0.195	1	0.715	1	0.727	1	0.626	1	0.755	1	0.652	1	ligase activity, forming carbon-sulfur bonds	F
GO:0016878	18	0.818	1	0.579	1	0.488	1	0.857	1	0.606	1	0.462	1	1	1	0.582	1	acid-thiol ligase activity	F
GO:0016879	234	0.0393	1	0.000365	0.011	0.000348	0.00718	2.35e-06	0	0.257	1	0.00476	0.074	0.345	1	0.339	1	ligase activity, forming carbon-nitrogen bonds	F
GO:0016881	195	0.0114	0.272	0.00029	0.00826	0.000334	0.00718	1.68e-06	0	0.0718	1	0.00529	0.074	0.268	1	0.209	1	acid-amino acid ligase activity	F
GO:0016884	10	0.444	1	0.497	1	0.352	1	0.726	1	0.698	1	0.353	1	0.159	1	0.854	1	carbon-nitrogen ligase activity, with glutamine as amido-N-donor	F
GO:0016887	372	0.22	1	0.0429	1	0.009	0.157	0.000639	0.00843	0.465	1	0.103	1	0.792	1	0.912	1	ATPase activity	F
GO:0016891	23	0.521	1	0.131	1	0.252	1	0.0876	1	0.531	1	0.541	1	0.98	1	0.997	1	endoribonuclease activity, producing 5'-phosphomonoesters	F
GO:0016892	15	0.878	1	1	1	1	1	1	1	0.613	1	0.996	1	0.569	1	0.995	1	endoribonuclease activity, producing 3'-phosphomonoesters	F
GO:0016893	29	0.389	1	0.101	1	0.166	1	0.0737	1	0.538	1	0.468	1	0.808	1	0.978	1	endonuclease activity, active with either ribo- or deoxyribonucleic acids and producing 5'-phosphomonoesters	F
GO:0016894	17	0.56	1	0.932	1	0.803	1	0.951	1	0.457	1	0.841	1	0.346	1	0.999	1	endonuclease activity, active with either ribo- or deoxyribonucleic acids and producing 3'-phosphomonoesters	F
GO:0016895	10	0.819	1	0.521	1	0.291	1	0.987	1	0.937	1	0.28	1	0.992	1	0.996	1	exodeoxyribonuclease activity, producing 5'-phosphomonoesters	F
GO:0016896	12	0.334	1	0.0955	1	0.0733	1	0.121	1	0.388	1	0.0772	1	0.69	1	0.962	1	exoribonuclease activity, producing 5'-phosphomonoesters	F
GO:0016903	31	0.179	1	0.117	1	0.237	1	0.052	1	0.122	1	0.0895	1	0.468	1	0.993	1	oxidoreductase activity, acting on the aldehyde or oxo group of donors	F
GO:0016917	60	0.998	1	1	1	0.977	1	1	1	0.997	1	1	1	0.994	1	1	1	GABA receptor activity	F
GO:0016918	12	0.382	1	0.68	1	0.737	1	0.954	1	0.146	1	0.458	1	1	1	1	1	retinal binding	F
GO:0016986	19	0.191	1	0.00324	0.063	0.0908	1	0.0156	0.281	0.288	1	0.0091	0.143	0.271	1	0.301	1	transcription initiation factor activity	F
GO:0016998	17	0.876	1	0.873	1	0.729	1	0.328	1	0.865	1	0.976	1	0.534	1	0.415	1	cell wall catabolism	P
GO:0017015	26	0.675	1	0.291	1	0.545	1	0.36	1	0.56	1	0.299	1	0.995	1	0.334	1	regulation of transforming growth factor beta receptor signaling pathway	P
GO:0017016	66	0.662	1	0.365	1	0.595	1	0.155	1	0.628	1	0.584	1	0.613	1	0.256	1	Ras GTPase binding	F
GO:0017017	13	1	1	1	1	0.868	1	0.703	1	1	1	1	1	1	1	0.976	1	MAP kinase phosphatase activity	F
GO:0017022	19	0.541	1	0.617	1	0.185	1	0.872	1	0.601	1	0.403	1	0.941	1	0.951	1	myosin binding	F
GO:0017038	128	0.102	1	0.0377	1	0.054	1	0.0099	0.123	0.142	1	0.0655	1	0.518	1	0.478	1	protein import	P
GO:0017040	10	0.0731	1	0.174	1	0.0865	1	0.459	1	0.0934	1	0.159	1	0.134	1	0.257	1	ceramidase activity	F
GO:0017046	12	0.977	1	0.957	1	0.751	1	0.94	1	0.987	1	0.9	1	0.997	1	0.999	1	peptide hormone binding	F
GO:0017048	28	0.79	1	0.564	1	0.55	1	0.512	1	0.792	1	0.555	1	0.718	1	0.66	1	Rho GTPase binding	F
GO:0017053	12	0.47	1	0.979	1	0.57	1	0.864	1	0.4	1	0.963	1	0.522	1	0.982	1	transcriptional repressor complex	C
GO:0017076	2027	0.000817	0.016	2.05e-05	0.00221	5.63e-11	0	5.74e-07	0	0.0968	1	0.00156	0.03	0.886	1	0.764	1	purine nucleotide binding	F
GO:0017111	751	0.0785	1	0.00335	0.063	9.33e-06	0.000971	0.00068	0.00843	0.65	1	0.0578	1	0.859	1	0.579	1	nucleoside-triphosphatase activity	F
GO:0017124	29	0.507	1	0.705	1	0.0772	1	0.312	1	0.828	1	0.784	1	0.851	1	0.728	1	SH3 domain binding	F
GO:0017127	12	0.991	1	0.575	1	0.188	1	0.885	1	1	1	0.315	1	1	1	1	1	cholesterol transporter activity	F
GO:0017137	21	0.574	1	0.677	1	0.244	1	0.315	1	0.678	1	0.822	1	0.759	1	0.602	1	Rab GTPase binding	F
GO:0017148	41	0.42	1	0.431	1	0.424	1	0.13	1	0.461	1	0.648	1	0.451	1	0.366	1	negative regulation of protein biosynthesis	P
GO:0017153	55	0.996	1	0.849	1	0.817	1	0.306	1	0.999	1	0.812	1	0.798	1	0.999	1	sodium:dicarboxylate symporter activity	F
GO:0017156	21	0.594	1	0.986	1	0.463	1	0.975	1	0.946	1	0.992	1	0.0693	1	0.706	1	calcium ion-dependent exocytosis	P
GO:0017157	18	0.366	1	0.496	1	0.363	1	0.279	1	0.352	1	0.676	1	0.988	1	0.82	1	regulation of exocytosis	P
GO:0018024	29	0.035	1	0.0391	1	0.00711	0.157	0.0769	1	0.0565	1	0.121	1	0.574	1	0.024	0.252	histone-lysine N-methyltransferase activity	F
GO:0018105	16	0.397	1	0.104	1	0.483	1	0.078	1	0.244	1	0.12	1	0.903	1	0.3	1	peptidyl-serine phosphorylation	P
GO:0018108	68	0.982	1	0.971	1	0.519	1	0.93	1	0.971	1	0.823	1	1	1	1	1	peptidyl-tyrosine phosphorylation	P
GO:0018149	18	0.99	1	1	1	0.476	1	0.999	1	0.999	1	1	1	0.992	1	1	1	peptide cross-linking	P
GO:0018193	144	0.656	1	0.316	1	0.0313	0.565	0.0206	0.41	0.683	1	0.405	1	1	1	0.986	1	peptidyl-amino acid modification	P
GO:0018205	10	0.229	1	0.195	1	0.0686	1	0.205	1	0.34	1	0.288	1	0.999	1	0.288	1	peptidyl-lysine modification	P
GO:0018209	19	0.634	1	0.19	1	0.65	1	0.0847	1	0.439	1	0.239	1	0.957	1	0.434	1	peptidyl-serine modification	P
GO:0018212	70	0.977	1	0.952	1	0.474	1	0.889	1	0.97	1	0.794	1	1	1	1	1	peptidyl-tyrosine modification	P
GO:0018298	16	0.912	1	1	1	0.259	1	0.995	1	0.807	1	1	1	1	1	1	1	protein-chromophore linkage	P
GO:0018958	77	0.986	1	0.6	1	0.551	1	0.299	1	0.992	1	0.448	1	0.999	1	0.999	1	phenol metabolism	P
GO:0019001	407	0.131	1	0.176	1	0.000834	0.0125	0.0396	1	0.611	1	0.509	1	0.827	1	0.777	1	guanyl nucleotide binding	F
GO:0019012	15	1	1	0.963	1	0.558	1	0.836	1	1	1	0.987	1	1	1	0.244	1	virion	C
GO:0019028	15	1	1	0.963	1	0.558	1	0.836	1	1	1	0.987	1	1	1	0.244	1	viral capsid	C
GO:0019048	14	0.593	1	0.751	1	0.549	1	0.893	1	0.402	1	0.635	1	1	1	0.71	1	virus-host interaction	P
GO:0019058	55	0.931	1	0.994	1	0.86	1	0.979	1	0.759	1	0.995	1	1	1	0.826	1	viral infectious cycle	P
GO:0019059	21	0.831	1	0.642	1	0.458	1	0.659	1	0.827	1	0.724	1	0.977	1	0.382	1	initiation of viral infection	P
GO:0019079	30	0.984	1	0.997	1	1	1	1	1	0.831	1	0.996	1	0.998	1	0.533	1	viral genome replication	P
GO:0019098	16	1	1	1	1	0.945	1	1	1	1	1	0.972	1	1	1	1	1	reproductive behavior	P
GO:0019104	11	0.172	1	0.169	1	0.186	1	0.579	1	0.153	1	0.0577	1	0.7	1	1	1	DNA N-glycosylase activity	F
GO:0019198	18	1	1	0.999	1	0.926	1	0.984	1	0.999	1	0.999	1	1	1	1	1	transmembrane receptor protein phosphatase activity	F
GO:0019199	139	1	1	1	1	0.962	1	1	1	1	1	1	1	1	1	1	1	transmembrane receptor protein kinase activity	F
GO:0019200	31	0.61	1	0.0481	1	0.132	1	0.00917	0.112	0.756	1	0.0885	1	0.999	1	0.365	1	carbohydrate kinase activity	F
GO:0019201	23	0.509	1	0.183	1	0.0534	1	0.0112	0.127	0.731	1	0.458	1	0.965	1	0.574	1	nucleotide kinase activity	F
GO:0019205	52	0.575	1	0.122	1	0.0625	1	0.00346	0.056	0.648	1	0.353	1	0.997	1	0.881	1	nucleobase, nucleoside, nucleotide kinase activity	F
GO:0019206	15	0.934	1	0.0898	1	0.163	1	0.0154	0.281	0.981	1	0.211	1	0.979	1	0.626	1	nucleoside kinase activity	F
GO:0019207	101	0.962	1	0.997	1	0.687	1	0.995	1	0.938	1	0.997	1	0.991	1	0.884	1	kinase regulator activity	F
GO:0019208	58	0.561	1	0.89	1	0.259	1	0.192	1	0.502	1	0.971	1	0.924	1	0.879	1	phosphatase regulator activity	F
GO:0019209	18	0.945	1	0.925	1	0.407	1	0.847	1	0.985	1	0.914	1	0.917	1	0.909	1	kinase activator activity	F
GO:0019210	31	0.779	1	0.979	1	0.403	1	0.887	1	0.717	1	0.971	1	0.989	1	0.828	1	kinase inhibitor activity	F
GO:0019212	30	0.544	1	0.91	1	0.228	1	0.377	1	0.483	1	0.979	1	0.975	1	0.909	1	phosphatase inhibitor activity	F
GO:0019213	23	0.0432	1	0.236	1	0.0457	0.868	0.603	1	0.0651	1	0.144	1	0.386	1	0.494	1	deacetylase activity	F
GO:0019216	53	0.474	1	0.644	1	0.141	1	0.288	1	0.509	1	0.579	1	0.951	1	0.997	1	regulation of lipid metabolism	P
GO:0019217	24	0.273	1	0.416	1	0.155	1	0.158	1	0.286	1	0.38	1	0.833	1	0.976	1	regulation of fatty acid metabolism	P
GO:0019218	18	0.652	1	0.743	1	0.227	1	0.386	1	0.704	1	0.694	1	0.91	1	0.946	1	regulation of steroid metabolism	P
GO:0019219	2681	0.992	1	7.48e-05	0.004	0.0297	0.565	3.57e-08	0	0.993	1	0.00317	0.064	1	1	0.677	1	regulation of nucleobase, nucleoside, nucleotide and nucleic acid metabolism	P
GO:0019220	125	0.943	1	0.998	1	0.234	1	0.997	1	0.987	1	0.995	1	0.98	1	0.973	1	regulation of phosphate metabolism	P
GO:0019221	45	0.998	1	0.992	1	0.887	1	1	1	0.985	1	0.952	1	1	1	0.982	1	cytokine and chemokine mediated signaling pathway	P
GO:0019222	3117	0.97	1	9.58e-05	0.004	0.00578	0.093	1.14e-08	0	0.973	1	0.00373	0.074	1	1	0.786	1	regulation of metabolism	P
GO:0019226	346	1	1	1	1	0.957	1	0.94	1	1	1	1	1	1	1	1	1	transmission of nerve impulse	P
GO:0019229	20	0.999	1	1	1	0.988	1	0.975	1	0.998	1	1	1	0.998	1	1	1	regulation of vasoconstriction	P
GO:0019233	24	0.974	1	0.954	1	0.987	1	0.371	1	0.94	1	0.965	1	0.922	1	1	1	sensory perception of pain	P
GO:0019239	28	0.486	1	0.58	1	0.341	1	0.482	1	0.613	1	0.406	1	0.411	1	0.991	1	deaminase activity	F
GO:0019290	44	0.838	1	0.251	1	0.451	1	0.408	1	0.889	1	0.15	1	0.922	1	0.917	1	siderophore biosynthesis	P
GO:0019318	173	0.0713	1	0.0535	1	0.0138	0.192	0.0854	1	0.107	1	0.0651	1	0.821	1	0.417	1	hexose metabolism	P
GO:0019319	32	0.87	1	0.716	1	0.534	1	0.544	1	0.702	1	0.652	1	1	1	0.848	1	hexose biosynthesis	P
GO:0019320	81	0.0158	0.31	0.00516	0.131	0.00727	0.157	0.0574	1	0.0326	0.655	0.00951	0.143	0.654	1	0.0597	1	hexose catabolism	P
GO:0019321	10	0.282	1	0.217	1	0.0748	1	0.2	1	0.488	1	0.265	1	0.761	1	0.381	1	pentose metabolism	P
GO:0019362	31	0.0518	1	0.11	1	0.0333	0.587	0.155	1	0.0827	1	0.121	1	0.262	1	0.202	1	pyridine nucleotide metabolism	P
GO:0019363	13	0.309	1	0.25	1	0.369	1	0.418	1	0.262	1	0.21	1	0.495	1	0.453	1	pyridine nucleotide biosynthesis	P
GO:0019370	19	0.766	1	0.52	1	0.886	1	0.733	1	0.638	1	0.486	1	0.692	1	0.439	1	leukotriene biosynthesis	P
GO:0019395	38	0.0721	1	0.108	1	0.0412	0.587	0.0444	1	0.15	1	0.174	1	0.429	1	0.453	1	fatty acid oxidation	P
GO:0019438	55	0.856	1	0.282	1	0.496	1	0.304	1	0.926	1	0.207	1	0.751	1	0.94	1	aromatic compound biosynthesis	P
GO:0019439	19	0.114	1	0.348	1	0.0833	1	0.755	1	0.131	1	0.31	1	0.618	1	0.362	1	aromatic compound catabolism	P
GO:0019538	3650	0.0151	0.31	0.000981	0.02	1.34e-07	0	1.36e-09	0	0.202	1	0.0501	1	0.9	1	0.771	1	protein metabolism	P
GO:0019540	44	0.838	1	0.251	1	0.451	1	0.408	1	0.889	1	0.15	1	0.922	1	0.917	1	siderophore biosynthesis from catechol	P
GO:0019674	14	0.111	1	0.112	1	0.11	1	0.235	1	0.114	1	0.0916	1	0.284	1	0.182	1	NAD metabolism	P
GO:0019717	53	0.847	1	0.469	1	0.87	1	0.272	1	0.61	1	0.511	1	0.972	1	0.976	1	synaptosome	C
GO:0019722	47	0.858	1	0.724	1	0.542	1	0.69	1	0.883	1	0.589	1	0.998	1	0.845	1	calcium-mediated signaling	P
GO:0019724	115	0.995	1	0.998	1	0.876	1	0.939	1	0.989	1	0.991	1	0.999	1	1	1	B cell mediated immunity	P
GO:0019725	307	0.356	1	0.993	1	0.017	0.236	0.94	1	0.499	1	0.967	1	0.928	1	0.997	1	cell homeostasis	P
GO:0019748	96	0.574	1	0.0843	1	0.117	1	0.338	1	0.666	1	0.0575	1	0.954	1	0.573	1	secondary metabolism	P
GO:0019751	38	0.842	1	0.389	1	0.517	1	0.236	1	0.934	1	0.319	1	0.649	1	0.99	1	polyol metabolism	P
GO:0019752	676	0.212	1	0.25	1	0.000168	0.00457	0.167	1	0.506	1	0.195	1	0.996	1	0.908	1	carboxylic acid metabolism	P
GO:0019783	68	0.15	1	0.000446	0.019	0.00722	0.157	4.85e-06	0.000832	0.278	1	0.0107	0.212	0.855	1	0.021	0.177	small conjugating protein-specific protease activity	F
GO:0019787	174	0.0358	1	0.000528	0.019	0.000713	0.0125	5.64e-06	0.000832	0.175	1	0.00712	0.105	0.339	1	0.178	1	small conjugating protein ligase activity	F
GO:0019825	36	1	1	1	1	1	1	0.997	1	1	1	1	1	1	1	1	1	oxygen binding	F
GO:0019827	13	0.979	1	0.629	1	0.648	1	0.946	1	0.976	1	0.39	1	1	1	0.885	1	stem cell maintenance	P
GO:0019829	47	0.0407	1	0.208	1	0.0396	0.587	0.0836	1	0.127	1	0.275	1	0.324	1	0.883	1	cation-transporting ATPase activity	F
GO:0019835	25	0.872	1	0.886	1	0.88	1	0.82	1	0.854	1	0.854	1	0.778	1	0.89	1	cytolysis	P
GO:0019838	101	1	1	1	1	1	1	0.999	1	1	1	1	1	1	1	1	1	growth factor binding	F
GO:0019840	17	0.632	1	0.906	1	0.881	1	0.998	1	0.282	1	0.659	1	1	1	1	1	isoprenoid binding	F
GO:0019841	12	0.438	1	0.68	1	0.737	1	0.954	1	0.198	1	0.458	1	1	1	1	1	retinol binding	F
GO:0019842	149	0.0793	1	0.187	1	0.00365	0.035	0.261	1	0.0786	1	0.165	1	0.998	1	0.614	1	vitamin binding	F
GO:0019843	22	0.227	1	0.8	1	0.619	1	0.161	1	0.199	1	0.902	1	0.33	1	0.826	1	rRNA binding	F
GO:0019861	79	0.999	1	0.995	1	0.992	1	0.945	1	0.98	1	0.984	1	1	1	1	1	flagellum	C
GO:0019865	16	0.702	1	0.604	1	0.995	1	0.606	1	0.584	1	0.754	1	0.325	1	0.206	1	immunoglobulin binding	F
GO:0019866	306	0.00088	0.016	0.000596	0.019	0.000935	0.0125	0.00149	0.018	0.00654	0.148	0.00207	0.051	0.203	1	0.276	1	organelle inner membrane	C
GO:0019867	92	0.238	1	0.0428	1	0.11	1	0.0968	1	0.638	1	0.148	1	0.0777	1	0.154	1	outer membrane	C
GO:0019882	121	1	1	1	1	1	1	1	1	1	1	1	1	1	1	1	1	antigen processing and presentation	P
GO:0019883	14	0.942	1	0.801	1	0.968	1	0.995	1	0.79	1	0.486	1	0.997	1	1	1	antigen processing and presentation of endogenous antigen	P
GO:0019884	10	0.996	1	0.597	1	1	1	0.692	1	0.769	1	0.406	1	1	1	0.992	1	antigen processing and presentation of exogenous antigen	P
GO:0019885	12	0.915	1	0.74	1	0.889	1	0.972	1	0.745	1	0.484	1	1	1	0.999	1	antigen processing and presentation of endogenous peptide antigen via MHC class I	P
GO:0019887	83	0.997	1	1	1	0.868	1	0.997	1	0.995	1	1	1	0.999	1	0.983	1	protein kinase regulator activity	F
GO:0019888	56	0.506	1	0.865	1	0.234	1	0.191	1	0.443	1	0.959	1	0.916	1	0.862	1	protein phosphatase regulator activity	F
GO:0019897	42	0.664	1	0.801	1	0.574	1	0.997	1	0.614	1	0.6	1	0.682	1	0.718	1	extrinsic to plasma membrane	C
GO:0019898	81	0.699	1	0.826	1	0.261	1	0.805	1	0.684	1	0.725	1	0.979	1	0.924	1	extrinsic to membrane	C
GO:0019899	295	0.131	1	0.25	1	0.0127	0.192	0.0592	1	0.232	1	0.415	1	0.889	1	0.575	1	enzyme binding	F
GO:0019900	104	0.474	1	0.517	1	0.215	1	0.33	1	0.507	1	0.487	1	0.965	1	0.861	1	kinase binding	F
GO:0019901	87	0.229	1	0.407	1	0.131	1	0.397	1	0.264	1	0.358	1	0.9	1	0.682	1	protein kinase binding	F
GO:0019902	21	0.89	1	0.63	1	0.298	1	0.275	1	0.969	1	0.776	1	0.789	1	0.509	1	phosphatase binding	F
GO:0019903	16	0.959	1	0.535	1	0.56	1	0.316	1	0.981	1	0.655	1	0.825	1	0.403	1	protein phosphatase binding	F
GO:0019904	160	0.286	1	0.572	1	0.0897	1	0.163	1	0.339	1	0.6	1	0.767	1	0.887	1	protein domain specific binding	F
GO:0019905	24	0.991	1	1	1	0.391	1	0.574	1	0.999	1	1	1	0.999	1	1	1	syntaxin binding	F
GO:0019915	12	0.234	1	0.558	1	0.01	0.157	0.725	1	0.269	1	0.483	1	1	1	0.843	1	sequestering of lipid	P
GO:0019932	263	1	1	1	1	0.915	1	0.796	1	1	1	0.999	1	1	1	1	1	second-messenger-mediated signaling	P
GO:0019933	96	1	1	1	1	1	1	0.814	1	1	1	1	1	1	1	1	1	cAMP-mediated signaling	P
GO:0019935	125	1	1	1	1	0.986	1	0.83	1	1	1	1	1	1	1	1	1	cyclic-nucleotide-mediated signaling	P
GO:0019941	221	0.00712	0.137	1.61e-05	0.00221	0.0241	0.497	3.05e-08	0	0.0611	1	0.000995	0.0102	0.591	1	0.0607	1	modification-dependent protein catabolism	P
GO:0019953	379	0.902	1	0.484	1	0.559	1	0.236	1	0.852	1	0.463	1	0.987	1	0.873	1	sexual reproduction	P
GO:0019955	137	0.995	1	1	1	0.99	1	0.964	1	0.928	1	1	1	1	1	1	1	cytokine binding	F
GO:0019956	58	1	1	1	1	0.998	1	0.756	1	0.988	1	0.998	1	0.999	1	1	1	chemokine binding	F
GO:0019957	40	0.981	1	0.982	1	0.935	1	0.523	1	0.882	1	0.968	1	1	1	1	1	C-C chemokine binding	F
GO:0019958	36	0.999	1	0.988	1	0.98	1	0.554	1	0.986	1	0.98	1	0.947	1	1	1	C-X-C chemokine binding	F
GO:0019959	10	0.999	1	0.462	1	0.794	1	0.566	1	1	1	0.378	1	0.606	1	0.95	1	interleukin-8 binding	F
GO:0019965	67	0.813	1	0.996	1	0.749	1	0.996	1	0.688	1	0.936	1	0.992	1	1	1	interleukin binding	F
GO:0019966	32	1	1	1	1	1	1	1	1	1	1	1	1	1	1	1	1	interleukin-1 binding	F
GO:0019992	65	0.214	1	0.306	1	0.191	1	0.108	1	0.372	1	0.292	1	0.236	1	0.896	1	diacylglycerol binding	F
GO:0020037	166	0.972	1	1	1	0.996	1	1	1	0.999	1	1	1	0.43	1	1	1	heme binding	F
GO:0021510	30	1	1	1	1	1	1	1	1	1	1	1	1	1	1	1	1	spinal cord development	P
GO:0021515	22	1	1	1	1	0.999	1	1	1	1	1	1	1	1	1	1	1	cell differentiation in spinal cord	P
GO:0021516	10	1	1	1	1	1	1	0.999	1	1	1	1	1	1	1	1	1	dorsal spinal cord development	P
GO:0021517	13	0.999	1	1	1	0.936	1	1	1	0.997	1	1	1	1	1	1	1	ventral spinal cord development	P
GO:0021522	11	0.989	1	1	1	0.854	1	1	1	0.984	1	1	1	1	1	1	1	spinal cord motor neuron differentiation	P
GO:0021536	22	0.998	1	1	1	0.838	1	0.993	1	0.998	1	1	1	1	1	1	1	diencephalon development	P
GO:0021537	36	0.999	1	0.987	1	0.998	1	0.726	1	1	1	0.993	1	0.694	1	0.997	1	telencephalon development	P
GO:0021543	25	0.958	1	0.848	1	0.952	1	0.425	1	0.976	1	0.886	1	0.611	1	0.912	1	pallium development	P
GO:0021545	10	0.827	1	0.988	1	0.98	1	0.956	1	0.807	1	0.98	1	0.811	1	1	1	cranial nerve development	P
GO:0021549	17	0.922	1	1	1	0.733	1	0.939	1	0.951	1	1	1	0.872	1	0.998	1	cerebellum development	P
GO:0021575	12	0.745	1	0.975	1	0.538	1	0.654	1	0.833	1	0.992	1	0.684	1	0.924	1	hindbrain morphogenesis	P
GO:0021587	11	0.734	1	0.969	1	0.578	1	0.691	1	0.802	1	0.985	1	0.686	1	0.946	1	cerebellum morphogenesis	P
GO:0021675	15	0.83	1	0.996	1	0.723	1	0.998	1	0.942	1	0.99	1	0.416	1	1	1	nerve development	P
GO:0021695	13	0.811	1	0.992	1	0.651	1	0.805	1	0.871	1	0.997	1	0.721	1	0.967	1	cerebellar cortex development	P
GO:0021696	11	0.734	1	0.969	1	0.578	1	0.691	1	0.802	1	0.985	1	0.686	1	0.946	1	cerebellar cortex morphogenesis	P
GO:0021700	84	0.995	1	1	1	0.386	1	1	1	1	1	1	1	0.999	1	1	1	developmental maturation	P
GO:0021761	17	0.987	1	0.853	1	0.994	1	0.531	1	0.995	1	0.905	1	0.693	1	0.855	1	limbic system development	P
GO:0021766	13	0.864	1	0.552	1	0.902	1	0.188	1	0.917	1	0.656	1	0.542	1	0.639	1	hippocampus development	P
GO:0021782	13	0.702	1	0.77	1	0.229	1	0.365	1	0.986	1	0.915	1	0.405	1	0.551	1	glial cell development	P
GO:0021872	10	1	1	1	1	1	1	0.962	1	1	1	1	1	0.999	1	1	1	generation of neurons in the forebrain	P
GO:0021885	10	0.868	1	0.851	1	0.855	1	0.741	1	0.87	1	0.774	1	0.635	1	1	1	forebrain cell migration	P
GO:0021895	10	1	1	0.999	1	1	1	0.895	1	1	1	0.999	1	0.999	1	1	1	cerebral cortex neuron differentiation	P
GO:0021915	48	0.981	1	0.986	1	0.9	1	0.84	1	0.953	1	0.994	1	0.997	1	0.918	1	neural tube development	P
GO:0021953	26	0.98	1	0.991	1	0.884	1	0.841	1	0.998	1	0.984	1	0.723	1	1	1	central nervous system neuron differentiation	P
GO:0021954	23	0.999	1	0.99	1	0.998	1	0.837	1	1	1	0.984	1	0.968	1	1	1	central nervous system neuron development	P
GO:0021955	10	0.907	1	0.675	1	0.967	1	0.611	1	0.903	1	0.604	1	0.734	1	0.93	1	central nervous system neuron axonogenesis	P
GO:0021983	18	0.964	1	1	1	0.669	1	0.945	1	0.964	1	1	1	0.999	1	0.998	1	pituitary gland development	P
GO:0021987	18	0.603	1	0.416	1	0.688	1	0.152	1	0.725	1	0.455	1	0.251	1	0.624	1	cerebral cortex development	P
GO:0022008	404	1	1	1	1	1	1	0.995	1	1	1	1	1	1	1	1	1	neurogenesis	P
GO:0022037	21	0.976	1	1	1	0.9	1	0.994	1	0.964	1	1	1	0.949	1	0.998	1	metencephalon development	P
GO:0030001	596	1	1	1	1	0.92	1	0.952	1	1	1	1	1	1	1	1	1	metal ion transport	P
GO:0030003	189	0.627	1	0.993	1	0.0211	0.236	0.962	1	0.857	1	0.963	1	0.955	1	0.988	1	cation homeostasis	P
GO:0030004	18	0.0772	1	0.302	1	0.0492	0.868	0.411	1	0.126	1	0.202	1	0.419	1	0.81	1	monovalent inorganic cation homeostasis	P
GO:0030005	167	0.787	1	0.99	1	0.062	1	0.942	1	0.926	1	0.971	1	0.953	1	0.979	1	di-, tri-valent inorganic cation homeostasis	P
GO:0030010	11	0.597	1	0.717	1	0.344	1	0.737	1	0.598	1	0.721	1	0.836	1	0.604	1	establishment of cell polarity	P
GO:0030016	79	0.847	1	0.998	1	0.328	1	0.994	1	0.957	1	0.995	1	0.939	1	0.992	1	myofibril	C
GO:0030017	74	0.803	1	0.998	1	0.329	1	0.998	1	0.936	1	0.993	1	0.899	1	0.987	1	sarcomere	C
GO:0030018	26	0.888	1	0.77	1	0.927	1	0.985	1	0.968	1	0.654	1	0.336	1	0.52	1	Z disc	C
GO:0030027	55	0.752	1	0.459	1	0.622	1	0.295	1	0.542	1	0.564	1	0.999	1	0.483	1	lamellipodium	C
GO:0030029	255	0.234	1	0.827	1	0.0044	0.035	0.193	1	0.357	1	0.904	1	0.92	1	0.886	1	actin filament-based process	P
GO:0030030	308	1	1	1	1	0.999	1	0.998	1	1	1	1	1	1	1	1	1	cell projection organization and biogenesis	P
GO:0030031	80	0.865	1	0.317	1	0.454	1	0.238	1	0.794	1	0.184	1	0.992	1	0.913	1	cell projection biogenesis	P
GO:0030032	13	0.865	1	0.274	1	0.788	1	0.23	1	0.757	1	0.326	1	0.964	1	0.306	1	lamellipodium biogenesis	P
GO:0030035	18	0.393	1	0.202	1	0.301	1	0.199	1	0.348	1	0.0976	1	0.749	1	0.878	1	microspike biogenesis	P
GO:0030036	229	0.341	1	0.504	1	0.011	0.157	0.0606	1	0.455	1	0.692	1	0.908	1	0.67	1	actin cytoskeleton organization and biogenesis	P
GO:0030041	36	0.135	1	0.34	1	0.395	1	0.199	1	0.071	1	0.349	1	0.666	1	0.564	1	actin filament polymerization	P
GO:0030042	24	0.0256	1	0.248	1	0.0059	0.093	0.0632	1	0.039	1	0.416	1	0.831	1	0.437	1	actin filament depolymerization	P
GO:0030048	20	0.635	1	0.998	1	0.253	1	0.771	1	0.711	1	0.999	1	0.939	1	1	1	actin filament-based movement	P
GO:0030054	450	1	1	1	1	0.457	1	0.777	1	1	1	1	1	1	1	0.999	1	cell junction	C
GO:0030055	47	0.421	1	0.893	1	0.119	1	0.443	1	0.356	1	0.884	1	1	1	0.993	1	cell-matrix junction	C
GO:0030057	10	0.976	1	0.906	1	0.893	1	0.754	1	0.99	1	0.868	1	0.811	1	0.993	1	desmosome	C
GO:0030072	35	0.998	1	0.989	1	0.97	1	0.353	1	0.996	1	0.999	1	1	1	1	1	peptide hormone secretion	P
GO:0030073	29	0.988	1	0.983	1	0.934	1	0.437	1	0.984	1	0.998	1	0.999	1	1	1	insulin secretion	P
GO:0030097	231	0.882	1	0.99	1	0.267	1	0.914	1	0.966	1	0.958	1	0.92	1	1	1	hemopoiesis	P
GO:0030098	101	0.652	1	0.994	1	0.144	1	0.988	1	0.814	1	0.986	1	0.865	1	0.998	1	lymphocyte differentiation	P
GO:0030099	106	0.575	1	0.891	1	0.161	1	0.991	1	0.808	1	0.691	1	0.831	1	0.95	1	myeloid cell differentiation	P
GO:0030100	41	0.508	1	0.0901	1	0.728	1	0.237	1	0.205	1	0.153	1	0.998	1	0.0816	1	regulation of endocytosis	P
GO:0030101	20	0.608	1	0.992	1	0.857	1	0.999	1	0.425	1	0.949	1	0.755	1	0.996	1	natural killer cell activation	P
GO:0030111	32	0.997	1	0.787	1	0.839	1	0.837	1	0.999	1	0.713	1	0.988	1	0.891	1	regulation of Wnt receptor signaling pathway	P
GO:0030117	65	0.000277	0.011	0.00013	0.004	9.31e-05	0.00457	0.000845	0.0103	0.000616	0.0049	0.000311	0.0102	0.427	1	0.314	1	membrane coat	C
GO:0030118	39	0.00717	0.137	0.00558	0.15	0.00061	0.0125	0.00192	0.027	0.0131	0.301	0.0235	0.769	0.729	1	0.462	1	clathrin coat	C
GO:0030119	30	0.0169	0.562	0.0196	0.924	0.0039	0.035	0.00296	0.056	0.0336	0.655	0.0595	1	0.577	1	0.723	1	membrane coat adaptor complex	C
GO:0030120	35	0.00042	0.016	0.000591	0.019	0.000816	0.0125	0.0105	0.123	0.000608	0.0049	0.0011	0.0102	0.648	1	0.143	1	vesicle coat	C
GO:0030125	19	0.0346	1	0.0853	1	0.00932	0.157	0.0407	1	0.0295	0.655	0.194	1	0.998	1	0.573	1	clathrin vesicle coat	C
GO:0030130	13	0.0745	1	0.437	1	0.00274	0.018	0.229	1	0.109	1	0.612	1	0.945	1	0.734	1	clathrin coat of trans-Golgi network vesicle	C
GO:0030131	29	0.0137	0.272	0.0128	0.384	0.00384	0.035	0.00296	0.056	0.0283	0.655	0.0383	1	0.528	1	0.684	1	clathrin adaptor complex	C
GO:0030132	10	0.144	1	0.216	1	0.319	1	0.114	1	0.088	1	0.424	1	0.902	1	0.315	1	clathrin coat of coated pit	C
GO:0030133	50	0.0857	1	0.466	1	0.00537	0.093	0.187	1	0.142	1	0.537	1	0.721	1	0.748	1	transport vesicle	C
GO:0030135	135	0.537	1	0.442	1	0.0504	0.868	0.0689	1	0.663	1	0.648	1	0.998	1	0.924	1	coated vesicle	C
GO:0030136	114	0.882	1	0.858	1	0.144	1	0.184	1	0.927	1	0.957	1	1	1	0.991	1	clathrin-coated vesicle	C
GO:0030137	12	0.0254	1	0.000719	0.019	0.119	1	0.162	1	0.0278	0.655	9.59e-05	0.00229	0.178	1	0.083	1	COPI-coated vesicle	C
GO:0030139	33	0.588	1	0.386	1	0.439	1	0.395	1	0.547	1	0.32	1	0.981	1	0.691	1	endocytic vesicle	C
GO:0030140	22	0.436	1	0.663	1	0.0438	0.724	0.263	1	0.494	1	0.834	1	0.999	1	0.745	1	trans-Golgi network transport vesicle	C
GO:0030141	90	0.805	1	0.992	1	0.44	1	0.99	1	0.756	1	0.978	1	0.976	1	0.956	1	secretory granule	C
GO:0030145	151	0.698	1	0.168	1	0.146	1	0.0249	0.41	0.606	1	0.362	1	0.999	1	0.738	1	manganese ion binding	F
GO:0030148	22	0.564	1	0.16	1	0.156	1	0.0691	1	0.649	1	0.136	1	0.698	1	0.67	1	sphingolipid biosynthesis	P
GO:0030149	16	0.239	1	0.0822	1	0.145	1	0.174	1	0.184	1	0.144	1	0.701	1	0.365	1	sphingolipid catabolism	P
GO:0030154	1323	1	1	1	1	1	1	1	1	1	1	1	1	1	1	1	1	cell differentiation	P
GO:0030155	71	0.863	1	0.984	1	0.25	1	0.959	1	0.87	1	0.979	1	1	1	0.933	1	regulation of cell adhesion	P
GO:0030159	19	0.871	1	0.834	1	0.393	1	0.523	1	0.94	1	0.796	1	0.95	1	0.956	1	receptor signaling complex scaffold activity	F
GO:0030162	20	0.46	1	0.86	1	0.118	1	0.89	1	0.547	1	0.761	1	0.996	1	0.995	1	regulation of proteolysis	P
GO:0030163	283	0.00747	0.137	2.42e-05	0.003	0.0208	0.236	7.74e-08	0	0.0383	1	0.000846	0.0102	0.897	1	0.115	1	protein catabolism	P
GO:0030165	27	0.811	1	0.829	1	0.517	1	0.84	1	0.906	1	0.731	1	0.734	1	0.898	1	PDZ domain binding	F
GO:0030166	24	0.925	1	0.924	1	0.517	1	0.545	1	0.969	1	0.846	1	0.895	1	1	1	proteoglycan biosynthesis	P
GO:0030168	22	0.864	1	0.829	1	0.811	1	0.804	1	0.643	1	0.789	1	1	1	0.93	1	platelet activation	P
GO:0030169	18	0.737	1	0.536	1	0.467	1	0.9	1	0.705	1	0.3	1	1	1	0.917	1	low-density lipoprotein binding	F
GO:0030170	61	0.157	1	0.0501	1	0.000297	0.006	0.09	1	0.515	1	0.0739	1	0.953	1	0.0725	1	pyridoxal phosphate binding	F
GO:0030173	40	0.679	1	0.672	1	0.445	1	0.76	1	0.595	1	0.525	1	0.972	1	0.838	1	integral to Golgi membrane	C
GO:0030175	17	0.377	1	0.0621	1	0.0639	1	0.0654	1	0.552	1	0.0575	1	0.963	1	0.317	1	filopodium	C
GO:0030176	38	0.55	1	0.525	1	0.102	1	0.166	1	0.632	1	0.792	1	0.966	1	0.221	1	integral to endoplasmic reticulum membrane	C
GO:0030178	20	0.984	1	0.781	1	0.956	1	0.795	1	0.984	1	0.734	1	0.97	1	0.788	1	negative regulation of Wnt receptor signaling pathway	P
GO:0030182	332	1	1	1	1	1	1	1	1	1	1	1	1	1	1	1	1	neuron differentiation	P
GO:0030183	51	0.794	1	1	1	0.221	1	0.973	1	0.959	1	1	1	0.621	1	0.999	1	B cell differentiation	P
GO:0030193	19	0.272	1	0.634	1	0.423	1	0.733	1	0.135	1	0.54	1	0.814	1	0.679	1	regulation of blood coagulation	P
GO:0030195	15	0.295	1	0.822	1	0.469	1	0.978	1	0.117	1	0.65	1	0.985	1	0.767	1	negative regulation of blood coagulation	P
GO:0030198	82	1	1	1	1	0.75	1	1	1	1	1	1	1	1	1	1	1	extracellular matrix organization and biogenesis	P
GO:0030199	14	1	1	1	1	1	1	1	1	1	1	1	1	1	1	1	1	collagen fibril organization	P
GO:0030201	13	0.999	1	0.951	1	0.621	1	0.946	1	0.983	1	0.623	1	1	1	1	1	heparan sulfate proteoglycan metabolism	P
GO:0030203	45	0.359	1	0.601	1	0.237	1	0.483	1	0.4	1	0.607	1	0.53	1	0.608	1	glycosaminoglycan metabolism	P
GO:0030216	38	1	1	1	1	0.914	1	1	1	1	1	1	1	1	1	1	1	keratinocyte differentiation	P
GO:0030217	62	0.458	1	0.917	1	0.337	1	0.709	1	0.393	1	0.914	1	0.944	1	0.966	1	T cell differentiation	P
GO:0030218	44	0.257	1	0.703	1	0.0664	1	0.807	1	0.74	1	0.588	1	0.25	1	0.856	1	erythrocyte differentiation	P
GO:0030225	15	0.442	1	0.747	1	0.199	1	0.611	1	0.95	1	0.655	1	0.454	1	0.941	1	macrophage differentiation	P
GO:0030228	13	0.826	1	0.356	1	0.538	1	0.739	1	0.783	1	0.211	1	0.997	1	0.758	1	lipoprotein receptor activity	F
GO:0030234	889	1	1	1	1	0.642	1	0.997	1	1	1	1	1	1	1	1	1	enzyme regulator activity	F
GO:0030239	16	0.287	1	1	1	0.146	1	0.996	1	0.319	1	0.999	1	0.678	1	1	1	myofibril assembly	P
GO:0030246	322	1	1	1	1	0.955	1	0.996	1	0.999	1	1	1	1	1	0.783	1	carbohydrate binding	F
GO:0030247	116	0.996	1	1	1	0.948	1	1	1	0.968	1	1	1	0.999	1	0.98	1	polysaccharide binding	F
GO:0030258	37	0.417	1	0.254	1	0.12	1	0.0989	1	0.565	1	0.488	1	0.558	1	0.179	1	lipid modification	P
GO:0030260	10	0.782	1	0.827	1	0.734	1	0.661	1	0.494	1	0.885	1	1	1	0.605	1	entry into host cell	P
GO:0030261	21	0.185	1	0.0995	1	0.396	1	0.0782	1	0.307	1	0.222	1	0.0799	1	0.205	1	chromosome condensation	P
GO:0030262	21	0.167	1	0.077	1	0.361	1	0.208	1	0.283	1	0.16	1	0.0868	1	0.216	1	apoptotic nuclear changes	P
GO:0030278	33	0.756	1	0.793	1	0.678	1	0.996	1	0.634	1	0.482	1	0.964	1	0.995	1	regulation of ossification	P
GO:0030279	10	0.46	1	0.955	1	0.356	1	0.998	1	0.452	1	0.817	1	0.714	1	0.993	1	negative regulation of ossification	P
GO:0030282	38	0.865	1	0.945	1	0.844	1	0.984	1	0.73	1	0.797	1	0.978	1	0.995	1	bone mineralization	P
GO:0030286	33	0.372	1	0.632	1	0.131	1	0.134	1	0.42	1	0.879	1	0.62	1	0.32	1	dynein complex	C
GO:0030288	27	0.951	1	0.956	1	0.473	1	0.591	1	0.964	1	0.959	1	0.971	1	0.937	1	periplasmic space (sensu Proteobacteria)	C
GO:0030295	12	0.933	1	0.972	1	0.969	1	0.876	1	0.919	1	0.959	1	0.906	1	0.99	1	protein kinase activator activity	F
GO:0030301	16	0.796	1	0.361	1	0.215	1	0.395	1	0.873	1	0.33	1	0.995	1	0.613	1	cholesterol transport	P
GO:0030308	64	0.531	1	0.985	1	0.19	1	0.573	1	0.589	1	0.988	1	0.975	1	0.999	1	negative regulation of cell growth	P
GO:0030312	33	0.991	1	0.995	1	0.638	1	0.76	1	0.99	1	0.994	1	0.998	1	0.99	1	external encapsulating structure	C
GO:0030313	28	0.955	1	0.963	1	0.462	1	0.639	1	0.966	1	0.961	1	0.982	1	0.94	1	cell envelope	C
GO:0030315	12	0.942	1	0.888	1	0.718	1	0.951	1	0.945	1	0.852	1	1	1	0.699	1	T-tubule	C
GO:0030316	19	0.995	1	0.936	1	0.998	1	0.972	1	0.969	1	0.847	1	0.999	1	0.998	1	osteoclast differentiation	P
GO:0030317	24	0.861	1	0.997	1	0.702	1	1	1	0.788	1	0.927	1	0.922	1	0.997	1	sperm motility	P
GO:0030318	16	1	1	1	1	1	1	0.975	1	1	1	0.999	1	1	1	1	1	melanocyte differentiation	P
GO:0030323	74	1	1	0.999	1	1	1	0.925	1	1	1	0.998	1	1	1	0.995	1	respiratory tube development	P
GO:0030324	71	1	1	0.997	1	1	1	0.913	1	1	1	0.995	1	1	1	0.994	1	lung development	P
GO:0030326	70	1	1	1	1	1	1	1	1	1	1	1	1	1	1	1	1	embryonic limb morphogenesis	P
GO:0030330	17	0.325	1	0.262	1	0.662	1	0.42	1	0.212	1	0.235	1	0.666	1	0.545	1	DNA damage response, signal transduction by p53 class mediator	P
GO:0030334	86	1	1	0.995	1	0.938	1	0.667	1	0.999	1	0.995	1	1	1	1	1	regulation of cell migration	P
GO:0030335	35	0.992	1	0.971	1	0.975	1	0.4	1	0.973	1	0.971	1	1	1	1	1	positive regulation of cell migration	P
GO:0030336	26	0.866	1	0.871	1	0.168	1	0.927	1	0.932	1	0.847	1	0.998	1	0.937	1	negative regulation of cell migration	P
GO:0030374	34	0.977	1	0.788	1	0.736	1	0.764	1	0.973	1	0.704	1	0.995	1	0.969	1	ligand-dependent nuclear receptor transcription coactivator activity	F
GO:0030375	17	1	1	1	1	0.835	1	0.995	1	1	1	1	1	1	1	1	1	thyroid hormone receptor coactivator activity	F
GO:0030384	63	0.21	1	0.077	1	0.126	1	0.0815	1	0.184	1	0.212	1	0.669	1	0.161	1	phosphoinositide metabolism	P
GO:0030414	182	1	1	1	1	0.997	1	1	1	1	1	1	1	1	1	1	1	protease inhibitor activity	F
GO:0030424	67	1	1	1	1	1	1	1	1	0.995	1	0.999	1	1	1	0.996	1	axon	C
GO:0030425	69	0.999	1	0.992	1	0.313	1	0.995	1	1	1	0.937	1	0.907	1	1	1	dendrite	C
GO:0030426	28	1	1	0.991	1	0.992	1	0.997	1	1	1	0.989	1	0.995	1	0.707	1	growth cone	C
GO:0030427	29	0.998	1	0.973	1	0.968	1	0.981	1	0.998	1	0.969	1	0.982	1	0.707	1	site of polarized growth	C
GO:0030433	18	0.695	1	0.371	1	0.895	1	0.183	1	0.506	1	0.433	1	0.818	1	0.668	1	ER-associated protein catabolism	P
GO:0030496	12	0.382	1	0.386	1	0.455	1	0.509	1	0.427	1	0.316	1	0.39	1	0.831	1	midbody	C
GO:0030500	22	0.71	1	0.847	1	0.798	1	0.881	1	0.662	1	0.746	1	0.576	1	0.97	1	regulation of bone mineralization	P
GO:0030501	13	0.793	1	0.946	1	0.836	1	0.752	1	0.694	1	0.953	1	0.976	1	0.993	1	positive regulation of bone mineralization	P
GO:0030509	50	1	1	0.999	1	0.98	1	0.602	1	0.998	1	1	1	1	1	1	1	BMP signaling pathway	P
GO:0030510	17	0.983	1	1	1	0.953	1	0.983	1	0.948	1	1	1	1	1	1	1	regulation of BMP signaling pathway	P
GO:0030514	11	0.999	1	0.999	1	0.995	1	0.976	1	0.996	1	0.997	1	1	1	0.989	1	negative regulation of BMP signaling pathway	P
GO:0030516	15	0.638	1	0.973	1	0.211	1	0.931	1	0.816	1	0.986	1	0.899	1	0.961	1	regulation of axon extension	P
GO:0030518	52	0.582	1	0.0461	1	0.0746	1	0.0101	0.123	0.812	1	0.0928	1	0.846	1	0.717	1	steroid hormone receptor signaling pathway	P
GO:0030521	37	0.343	1	0.072	1	0.121	1	0.0393	1	0.53	1	0.11	1	0.43	1	0.448	1	androgen receptor signaling pathway	P
GO:0030522	62	0.752	1	0.19	1	0.174	1	0.0378	1	0.864	1	0.264	1	0.968	1	0.852	1	intracellular receptor-mediated signaling pathway	P
GO:0030528	1517	1	1	0.982	1	0.738	1	0.132	1	1	1	0.994	1	1	1	0.999	1	transcription regulator activity	F
GO:0030529	535	0.00551	0.137	0.0002	0.00826	0.193	1	0.000597	0.00717	0.0168	0.381	0.00384	0.074	0.158	1	0.217	1	ribonucleoprotein complex	C
GO:0030530	16	0.952	1	0.814	1	0.859	1	0.973	1	0.793	1	0.784	1	1	1	0.349	1	heterogeneous nuclear ribonucleoprotein complex	C
[truncated: 1,086 more rows]
