# Supplementary material for: Alu and B1 Repeats Have Been Selectively Retained in the Upstream and Intronic Regions of Genes of Specific Functional Classes
Source: PLoS Comput Biol. 2009 Dec 18;5(12):e1000610. doi: 10.1371/journal.pcbi.1000610 (PMC2784220; doi:10.1371/journal.pcbi.1000610)
Supplement: Table S4 — GO term p-values and q-values for all mouse B families in upstream regions. (1.12 MB XLS) [file pcbi.1000610.s004.xls]

## Sheet: mouse B upstream
		B+		B-		B1+		B1-		B2+		B2-		B4+		B4-
GO term id	genes	p-value	q-value	p-value	q-value	p-value	q-value	p-value	q-value	p-value	q-value	p-value	q-value	p-value	q-value	p-value	q-value	GO term description	GO term catecory
GO:0000003	462	0.00275	0.212	0.0098	0.469	0.00754	0.641	0.099	1	0.0349	1	0.022	1	0.0124	0.424	0.0187	0.736	reproduction	P
GO:0000030	13	0.179	1	0.11	1	0.127	1	0.0466	1	0.566	1	0.17	1	0.256	1	0.367	1	mannosyltransferase activity	F
GO:0000041	75	0.259	1	0.103	1	0.244	1	0.141	1	0.388	1	0.101	1	0.536	1	0.647	1	transition metal ion transport	P
GO:0000045	14	0.0534	1	0.0389	1	0.0695	1	0.105	1	0.0341	1	0.111	1	0.569	1	0.0412	1	autophagic vacuole formation	P
GO:0000049	21	0.0284	1	0.0494	1	0.0256	1	0.0736	1	0.0281	1	0.114	1	0.103	1	0.192	1	tRNA binding	F
GO:0000051	16	0.0043	0.214	0.275	1	0.143	1	0.73	1	0.0565	1	0.403	1	0.000414	0.024	0.0586	1	urea cycle intermediate metabolism	P
GO:0000059	15	0.000571	0.0886	0.000268	0.044	0.000728	0.049	0.000106	0.013	0.0327	1	0.0234	1	0.11	1	0.00404	0.201	protein import into nucleus, docking	P
GO:0000060	22	0.0842	1	0.0675	1	0.0621	1	0.2	1	0.194	1	0.348	1	0.198	1	0.06	1	protein import into nucleus, translocation	P
GO:0000062	12	0.105	1	0.0255	1	0.288	1	0.314	1	0.126	1	0.328	1	0.214	1	0.0143	0.476	acyl-CoA binding	F
GO:0000070	23	0.0381	1	4.06e-06	0.00451	0.0109	0.653	1.17e-09	0	0.173	1	0.00815	0.421	0.174	1	0.0306	0.999	mitotic sister chromatid segregation	P
GO:0000074	255	1.72e-07	0.00257	3.2e-10	0	8.18e-07	0.002	2.54e-08	0.000893	0.000684	0.12	1.3e-07	0.00165	5.03e-05	0.008	6.47e-05	0.007	regulation of progression through cell cycle	P
GO:0000075	44	7.96e-06	0.00362	1.22e-07	0.00392	9.3e-05	0.0116	9.01e-06	0.00289	0.000373	0.049	0.0013	0.09	0.00203	0.084	0.000381	0.03	cell cycle checkpoint	P
GO:0000077	24	0.0039	0.212	3.59e-05	0.007	0.0221	1	0.0013	0.094	0.0197	0.79	0.0221	1	0.0398	1	0.000564	0.03	DNA damage checkpoint	P
GO:0000079	22	0.000941	0.0886	9.73e-05	0.015	0.000163	0.0116	6.51e-05	0.013	0.0194	0.79	0.000448	0.0233	0.0844	1	0.00607	0.428	regulation of cyclin-dependent protein kinase activity	P
GO:0000082	36	0.546	1	0.347	1	0.538	1	0.37	1	0.619	1	0.138	1	0.456	1	0.748	1	G1/S transition of mitotic cell cycle	P
GO:0000084	14	0.062	1	0.0069	0.312	0.0639	1	0.0273	1	0.159	1	0.00815	0.421	0.557	1	0.309	1	S phase of mitotic cell cycle	P
GO:0000086	10	0.0237	1	0.00614	0.308	0.0937	1	0.0169	0.647	0.0184	0.79	0.0181	0.668	0.0573	1	0.0155	0.656	G2/M transition of mitotic cell cycle	P
GO:0000087	198	6.56e-16	0	3.94e-17	0	3.47e-16	0	4.32e-18	0	1.33e-09	0	1.57e-09	0.000878	2.95e-05	0.004	6.38e-05	0.007	M phase of mitotic cell cycle	P
GO:0000096	21	0.0371	1	0.0123	0.607	0.0394	1	0.0163	0.647	0.42	1	0.00939	0.503	0.0553	1	0.401	1	sulfur amino acid metabolism	P
GO:0000097	12	0.00601	0.309	0.0135	0.607	0.0107	0.653	0.00532	0.288	0.107	1	0.0178	0.668	0.0557	1	0.851	1	sulfur amino acid biosynthesis	P
GO:0000118	28	0.0132	0.608	0.000205	0.024	0.00963	0.653	0.000401	0.042	0.0759	1	0.00625	0.421	0.132	1	0.0042	0.201	histone deacetylase complex	C
GO:0000119	23	0.0024	0.212	0.000481	0.0474	2.17e-06	0.002	0.00239	0.139	0.139	1	0.00541	0.343	0.344	1	0.104	1	mediator complex	C
GO:0000122	192	0.000188	0.0172	0.0012	0.0965	2.38e-05	0.003	0.00365	0.257	0.048	1	0.0509	1	0.00222	0.084	0.00225	0.079	negative regulation of transcription from RNA polymerase II promoter	P
GO:0000123	11	0.0269	1	8.24e-05	0.015	0.0335	1	0.000215	0.013	0.0561	1	0.00069	0.0448	0.135	1	0.0136	0.476	histone acetyltransferase complex	C
GO:0000139	315	9.45e-05	0.0143	1.99e-06	0.00392	0.000879	0.049	0.000177	0.013	0.000447	0.049	0.000545	0.032	0.036	0.838	0.00018	0.016	Golgi membrane	C
GO:0000149	30	0.132	1	0.552	1	0.768	1	0.604	1	0.185	1	0.728	1	0.0261	0.838	0.261	1	SNARE binding	F
GO:0000151	86	2.28e-05	0.007	2.21e-07	0.00392	6.1e-07	0.002	2.18e-06	0.00289	0.025	1	7.98e-06	0.00587	0.00861	0.275	0.0129	0.476	ubiquitin ligase complex	C
GO:0000152	11	0.02	1	0.00341	0.188	0.0046	0.308	0.0107	0.572	0.38	1	0.0138	0.668	0.0149	0.478	0.0714	1	nuclear ubiquitin ligase complex	C
GO:0000155	30	0.65	1	0.525	1	0.819	1	0.537	1	0.453	1	0.659	1	0.676	1	0.193	1	two-component sensor activity	F
GO:0000159	22	0.148	1	0.124	1	0.146	1	0.593	1	0.233	1	0.132	1	0.183	1	0.0655	1	protein phosphatase type 2A complex	C
GO:0000160	32	0.597	1	0.604	1	0.893	1	0.849	1	0.469	1	0.689	1	0.345	1	0.213	1	two-component signal transduction system (phosphorelay)	P
GO:0000165	151	0.0349	1	0.000601	0.059	0.235	1	0.0548	1	0.0463	1	0.00615	0.421	0.0918	1	0.000133	0.016	MAPKKK cascade	P
GO:0000166	2281	3.55e-39	0	0	0	7.58e-39	0	5.61e-45	0	2.14e-23	0	4.7e-37	0	2.96e-10	0	7.91e-23	0	nucleotide binding	F
GO:0000175	10	0.122	1	0.1	1	0.066	1	0.173	1	0.245	1	0.115	1	0.683	1	0.114	1	3'-5'-exoribonuclease activity	F
GO:0000178	12	0.00109	0.0886	0.296	1	0.000489	0.049	0.196	1	0.00335	0.213	0.337	1	0.0874	1	0.594	1	exosome (RNase complex)	C
GO:0000184	16	4.27e-05	0.00952	0.00305	0.188	4.16e-05	0.00982	0.00544	0.288	0.00154	0.12	0.000224	0.0233	0.00972	0.275	0.128	1	mRNA catabolism, nonsense-mediated decay	P
GO:0000186	16	0.818	1	0.176	1	0.454	1	0.483	1	0.852	1	0.37	1	0.909	1	0.0253	0.999	activation of MAPKK activity	P
GO:0000187	52	0.0168	1	0.119	1	0.105	1	0.388	1	0.0289	1	0.0557	1	0.0517	1	0.115	1	activation of MAPK activity	P
GO:0000209	17	0.0095	0.608	0.0126	0.607	0.025	1	0.0287	1	0.125	1	0.0313	1	0.0485	1	0.0593	1	protein polyubiquitination	P
GO:0000226	90	5.3e-05	0.00952	1.5e-05	0.00451	2.28e-05	0.003	0.00127	0.094	0.00155	0.12	0.000232	0.0233	0.00429	0.223	0.00152	0.06	microtubule cytoskeleton organization and biogenesis	P
GO:0000228	109	5.69e-09	0.00257	6.6e-09	0.00089	1.57e-09	0.00098	6.62e-09	0.000893	1.15e-05	0.003	1.93e-05	0.00587	0.00247	0.084	0.0114	0.476	nuclear chromosome	C
GO:0000245	20	0.011	0.608	0.0394	1	0.0419	1	0.0377	1	0.0473	1	0.336	1	0.0052	0.223	0.0456	1	spliceosome assembly	P
GO:0000267	600	0.00634	0.309	2.11e-06	0.00392	0.0132	0.653	9.79e-05	0.013	0.0189	0.79	0.000161	0.0233	0.072	1	6.96e-05	0.007	cell fraction	C
GO:0000271	42	0.6	1	0.023	1	0.834	1	0.169	1	0.275	1	0.0239	1	0.675	1	0.0188	0.736	polysaccharide biosynthesis	P
GO:0000272	15	0.376	1	0.912	1	0.616	1	0.756	1	0.095	1	0.965	1	0.639	1	0.845	1	polysaccharide catabolism	P
GO:0000278	281	1.01e-12	0	5.03e-13	0	7.03e-13	0.000708	1.5e-13	0	6.72e-07	0.00169	9.65e-09	0.000878	2.41e-05	0.004	0.00217	0.079	mitotic cell cycle	P
GO:0000279	268	8.86e-18	0	6.68e-22	0	1.58e-18	0	2.5e-21	0	7.51e-10	0	4.87e-12	0.00062	6.32e-06	0.001	4.97e-06	0.00291	M phase	P
GO:0000287	389	5.03e-06	0.00362	2.79e-10	0	8.05e-06	0.00291	1.05e-06	0.00289	0.00305	0.213	4.4e-08	0.000903	0.00463	0.223	8.99e-06	0.007	magnesium ion binding	F
GO:0000299	15	0.0163	1	0.011	0.469	0.00978	0.653	0.0266	1	0.0473	1	0.00957	0.503	0.471	1	0.143	1	integral to membrane of membrane fraction	C
GO:0000302	31	0.000869	0.0886	0.000763	0.081	0.00512	0.308	0.00401	0.288	0.0184	0.79	0.000162	0.0233	0.00271	0.084	0.0529	1	response to reactive oxygen species	P
GO:0000313	46	0.000134	0.0143	0.00954	0.469	5.17e-05	0.00982	0.0881	1	0.00353	0.213	0.00196	0.127	0.153	1	0.196	1	organellar ribosome	C
GO:0000314	14	1.63e-05	0.007	0.0275	1	0.00144	0.079	0.112	1	0.0107	0.692	0.0104	0.503	0.146	1	0.0973	1	organellar small ribosomal subunit	C
GO:0000315	24	0.033	1	0.142	1	0.0147	0.653	0.14	1	0.0292	1	0.141	1	0.522	1	0.459	1	organellar large ribosomal subunit	C
GO:0000323	201	1.66e-06	0.00276	3.09e-07	0.00392	0.00198	0.095	0.000148	0.013	0.000325	0.049	2.95e-05	0.00952	0.000141	0.008	0.000556	0.03	lytic vacuole	C
GO:0000375	51	0.00021	0.0172	0.00154	0.0965	0.00512	0.308	0.00404	0.288	0.00135	0.12	0.00548	0.343	0.00188	0.084	0.114	1	RNA splicing, via transesterification reactions	P
GO:0000377	51	0.00021	0.0172	0.00154	0.0965	0.00512	0.308	0.00404	0.288	0.00135	0.12	0.00548	0.343	0.00188	0.084	0.114	1	RNA splicing, via transesterification reactions with bulged adenosine as nucleophile	P
GO:0000398	51	0.00021	0.0172	0.00154	0.0965	0.00512	0.308	0.00404	0.288	0.00135	0.12	0.00548	0.343	0.00188	0.084	0.114	1	nuclear mRNA splicing, via spliceosome	P
GO:0000502	39	0.0306	1	0.0643	1	0.0373	1	0.0557	1	0.108	1	0.0198	0.756	0.283	1	0.708	1	proteasome complex (sensu Eukaryota)	C
GO:0000723	26	0.0815	1	0.00533	0.308	0.0601	1	0.0231	0.937	0.146	1	0.0109	0.503	0.174	1	0.0599	1	telomere maintenance	P
GO:0000724	13	0.0159	1	2.27e-05	0.007	0.00207	0.095	0.000201	0.013	0.22	1	0.0033	0.151	0.302	1	0.00114	0.06	double-strand break repair via homologous recombination	P
GO:0000725	13	0.0159	1	2.27e-05	0.007	0.00207	0.095	0.000201	0.013	0.22	1	0.0033	0.151	0.302	1	0.00114	0.06	recombinational repair	P
GO:0000775	81	1.29e-05	0.007	2.31e-06	0.00392	1.06e-06	0.002	6.25e-08	0.00289	0.00065	0.12	0.000576	0.032	0.156	1	0.0285	0.999	chromosome, pericentric region	C
GO:0000776	41	0.000179	0.0172	0.000109	0.015	0.000311	0.04	1.65e-06	0.00289	0.00904	0.692	0.008	0.421	0.0539	1	0.0366	1	kinetochore	C
GO:0000777	27	0.0138	0.608	0.00228	0.171	0.0359	1	2.06e-05	0.00957	0.00671	0.692	0.0482	1	0.354	1	0.044	1	condensed chromosome kinetochore	C
GO:0000779	36	0.0139	0.608	0.00202	0.13	0.0177	1	7.12e-05	0.013	0.0118	0.692	0.0335	1	0.366	1	0.0421	1	condensed chromosome, pericentric region	C
GO:0000781	22	0.0168	1	0.014	0.607	0.0191	1	0.0136	0.647	0.0474	1	0.0537	1	0.0727	1	0.103	1	chromosome, telomeric region	C
GO:0000784	10	0.119	1	0.256	1	0.0734	1	0.0831	1	0.245	1	0.425	1	0.246	1	0.876	1	nuclear chromosome, telomeric region	C
GO:0000785	314	0.00515	0.272	0.00216	0.171	0.000159	0.0116	2.83e-06	0.00289	0.199	1	0.114	1	0.0788	1	0.122	1	chromatin	C
GO:0000786	163	0.935	1	0.948	1	0.64	1	0.163	1	0.997	1	0.998	1	0.588	1	0.993	1	nucleosome	C
GO:0000790	40	1.98e-05	0.007	1.71e-05	0.00451	4.12e-05	0.00982	4.09e-05	0.00957	0.00331	0.213	0.000407	0.0233	0.0191	0.636	0.0102	0.476	nuclear chromatin	C
GO:0000792	43	0.000523	0.044	0.000132	0.015	0.000706	0.049	0.000208	0.013	0.0112	0.692	0.00346	0.151	0.0193	0.636	0.0137	0.476	heterochromatin	C
GO:0000793	84	1.52e-05	0.007	7.13e-07	0.00392	4.56e-06	0.00291	4.72e-07	0.00289	3.31e-05	0.00633	0.000302	0.0233	0.13	1	0.00612	0.428	condensed chromosome	C
GO:0000794	39	0.000167	0.0172	0.000317	0.044	0.000151	0.0116	0.00437	0.288	0.000863	0.12	0.0031	0.144	0.0413	1	0.0763	1	condensed nuclear chromosome	C
GO:0000795	19	0.00808	0.608	0.0311	1	0.0342	1	0.14	1	0.0177	0.79	0.00591	0.421	0.0508	1	0.222	1	synaptonemal complex	C
GO:0000803	15	0.00138	0.0886	0.0171	0.763	0.00587	0.469	0.00612	0.288	0.0279	1	0.0839	1	0.00804	0.275	0.205	1	sex chromosome	C
GO:0000819	24	0.0231	1	1.04e-06	0.00392	0.00807	0.641	1.41e-10	0	0.124	1	0.00372	0.18	0.155	1	0.0139	0.476	sister chromatid segregation	P
GO:0000902	584	0.000257	0.019	6.19e-06	0.00451	0.0243	1	0.00581	0.288	0.00167	0.12	0.000233	0.0233	0.00373	0.223	1.28e-06	0.002	cell morphogenesis	P
GO:0000904	219	0.39	1	0.277	1	0.756	1	0.638	1	0.231	1	0.511	1	0.294	1	0.0293	0.999	cellular morphogenesis during differentiation	P
GO:0000910	29	0.00025	0.019	0.000195	0.024	0.000579	0.049	6.54e-05	0.013	0.015	0.692	0.0402	1	0.078	1	0.0609	1	cytokinesis	P
GO:0000922	22	0.00735	0.315	0.000691	0.059	0.000643	0.049	0.000959	0.094	0.0149	0.692	0.0121	0.503	0.0629	1	0.0113	0.476	spindle pole	C
GO:0001501	288	0.508	1	0.976	1	0.892	1	0.951	1	0.354	1	0.945	1	0.331	1	0.897	1	skeletal development	P
GO:0001502	16	0.271	1	0.426	1	0.26	1	0.506	1	0.252	1	0.915	1	0.388	1	0.00423	0.201	cartilage condensation	P
GO:0001503	150	0.0333	1	0.247	1	0.427	1	0.277	1	0.0227	1	0.344	1	0.0515	1	0.317	1	ossification	P
GO:0001504	12	0.926	1	0.998	1	0.878	1	0.997	1	0.82	1	0.963	1	0.897	1	0.991	1	neurotransmitter uptake	P
GO:0001505	115	0.992	1	0.904	1	1	1	0.998	1	0.902	1	0.543	1	0.931	1	0.401	1	regulation of neurotransmitter levels	P
GO:0001508	51	0.49	1	0.155	1	0.338	1	0.25	1	0.547	1	0.339	1	0.672	1	0.0723	1	regulation of action potential	P
GO:0001518	11	0.884	1	0.907	1	1	1	0.994	1	0.945	1	0.999	1	0.129	1	0.0704	1	voltage-gated sodium channel complex	C
GO:0001522	13	0.0869	1	0.0886	1	0.0795	1	0.0896	1	0.214	1	0.463	1	0.141	1	0.118	1	pseudouridine synthesis	P
GO:0001523	16	0.998	1	0.718	1	0.984	1	0.929	1	0.988	1	0.48	1	0.992	1	0.528	1	retinoid metabolism	P
GO:0001525	160	0.228	1	0.0488	1	0.604	1	0.346	1	0.385	1	0.469	1	0.0486	1	0.000534	0.03	angiogenesis	P
GO:0001533	20	0.98	1	0.996	1	0.977	1	0.98	1	0.997	1	0.997	1	0.73	1	0.989	1	cornified envelope	C
GO:0001539	40	0.532	1	0.187	1	0.564	1	0.364	1	0.355	1	0.454	1	0.652	1	0.0863	1	ciliary or flagellar motility	P
GO:0001541	27	0.00908	0.608	0.0448	1	0.0306	1	0.0998	1	0.0192	0.79	0.0388	1	0.0927	1	0.272	1	ovarian follicle development	P
GO:0001542	10	0.77	1	0.979	1	0.768	1	0.905	1	0.574	1	0.999	1	0.682	1	0.975	1	ovulation (sensu Mammalia)	P
GO:0001558	127	0.0149	1	0.00288	0.188	0.0862	1	0.0184	0.937	0.0503	1	0.0159	0.668	0.0951	1	0.00583	0.428	regulation of cell growth	P
GO:0001565	17	0.615	1	0.274	1	0.374	1	0.318	1	0.699	1	0.191	1	0.573	1	0.571	1	phorbol ester receptor activity	F
GO:0001568	244	0.204	1	0.153	1	0.634	1	0.654	1	0.447	1	0.36	1	0.0609	1	0.00571	0.428	blood vessel development	P
GO:0001569	22	0.626	1	0.838	1	0.949	1	0.978	1	0.704	1	0.995	1	0.124	1	0.0504	1	patterning of blood vessels	P
GO:0001570	36	0.643	1	0.819	1	0.362	1	0.933	1	0.745	1	0.682	1	0.827	1	0.74	1	vasculogenesis	P
GO:0001580	19	1	1	1	1	1	1	1	1	1	1	1	1	0.998	1	0.989	1	detection of chemical stimulus during sensory perception of bitter taste	P
GO:0001584	1771	1	1	1	1	1	1	1	1	1	1	1	1	1	1	1	1	rhodopsin-like receptor activity	F
GO:0001595	63	0.537	1	0.436	1	0.99	1	0.94	1	0.306	1	0.0976	1	0.168	1	0.517	1	angiotensin receptor activity	F
GO:0001603	23	0.953	1	0.84	1	0.769	1	0.629	1	0.832	1	0.87	1	1	1	0.94	1	vasopressin-like receptor activity	F
GO:0001608	138	0.97	1	0.977	1	1	1	0.999	1	0.709	1	0.966	1	0.418	1	0.472	1	nucleotide receptor activity, G-protein coupled	F
GO:0001614	139	0.967	1	0.977	1	1	1	0.999	1	0.705	1	0.964	1	0.411	1	0.438	1	purinergic nucleotide receptor activity	F
GO:0001619	27	0.263	1	0.268	1	0.208	1	0.213	1	0.57	1	0.85	1	0.132	1	0.0723	1	lysosphingolipid and lysophosphatidic acid receptor activity	F
GO:0001633	29	0.804	1	0.497	1	0.93	1	0.899	1	0.95	1	0.332	1	0.173	1	0.147	1	secretin-like receptor activity	F
GO:0001637	48	0.777	1	0.862	1	0.999	1	0.999	1	0.686	1	0.559	1	0.144	1	0.322	1	G-protein chemoattractant receptor activity	F
GO:0001649	55	0.281	1	0.227	1	0.431	1	0.321	1	0.449	1	0.349	1	0.158	1	0.262	1	osteoblast differentiation	P
GO:0001653	719	1	1	1	1	1	1	1	1	1	1	1	1	1	1	1	1	peptide receptor activity	F
GO:0001654	102	0.115	1	0.595	1	0.109	1	0.504	1	0.264	1	0.583	1	0.137	1	0.669	1	eye development	P
GO:0001655	97	0.999	1	0.942	1	1	1	0.995	1	0.998	1	0.849	1	0.838	1	0.721	1	urogenital system development	P
GO:0001656	52	1	1	0.998	1	1	1	0.999	1	0.991	1	0.993	1	0.974	1	0.904	1	metanephros development	P
GO:0001657	41	0.998	1	1	1	0.999	1	1	1	0.996	1	1	1	0.886	1	0.957	1	ureteric bud development	P
GO:0001658	25	0.999	1	0.994	1	1	1	0.989	1	0.998	1	1	1	0.56	1	0.9	1	ureteric bud branching	P
GO:0001659	207	0.178	1	0.258	1	0.108	1	0.169	1	0.543	1	0.432	1	0.107	1	0.288	1	thermoregulation	P
GO:0001662	12	0.558	1	0.35	1	0.79	1	0.843	1	0.278	1	0.145	1	0.55	1	0.466	1	behavioral fear response	P
GO:0001664	81	0.259	1	0.695	1	0.33	1	0.992	1	0.535	1	0.312	1	0.0725	1	0.27	1	G-protein-coupled receptor binding	F
GO:0001666	77	0.0113	0.608	0.00449	0.261	0.197	1	0.00767	0.492	0.453	1	0.0143	0.668	1.98e-05	0.004	0.0382	1	response to hypoxia	P
GO:0001669	36	0.453	1	0.377	1	0.778	1	0.38	1	0.711	1	0.0834	1	0.15	1	0.953	1	acrosome	C
GO:0001676	16	0.231	1	0.0716	1	0.128	1	0.0529	1	0.647	1	0.105	1	0.089	1	0.248	1	long-chain fatty acid metabolism	P
GO:0001701	151	2.52e-08	0.00257	1.07e-06	0.00392	9.32e-07	0.002	6.79e-06	0.00289	1.73e-05	0.00537	0.00075	0.0448	0.000502	0.0344	0.00108	0.06	embryonic development (sensu Mammalia)	P
GO:0001702	27	0.229	1	0.0789	1	0.183	1	0.0422	1	0.106	1	0.187	1	0.887	1	0.358	1	gastrulation (sensu Deuterostomia)	P
GO:0001704	39	0.0179	1	0.00298	0.188	0.00249	0.107	0.0368	1	0.327	1	0.0165	0.668	0.14	1	0.0132	0.476	formation of primary germ layer	P
GO:0001707	35	0.0126	0.608	0.000815	0.081	0.00256	0.107	0.0207	0.937	0.206	1	0.00661	0.421	0.166	1	0.00862	0.428	mesoderm formation	P
GO:0001708	35	0.681	1	0.971	1	0.415	1	0.996	1	0.958	1	0.821	1	0.258	1	0.794	1	cell fate specification	P
GO:0001709	26	0.779	1	0.993	1	0.53	1	0.973	1	0.912	1	0.957	1	0.715	1	0.999	1	cell fate determination	P
GO:0001725	24	0.000113	0.0143	6.57e-05	0.007	0.00193	0.095	0.0136	0.647	0.000504	0.049	3.14e-05	0.00952	0.00284	0.084	0.00298	0.127	stress fiber	C
GO:0001726	46	3.28e-05	0.007	0.00112	0.0965	0.00392	0.22	0.00164	0.096	0.00234	0.12	0.00888	0.503	0.0036	0.223	0.306	1	ruffle	C
GO:0001727	24	0.0916	1	0.0585	1	0.0816	1	0.0394	1	0.22	1	0.153	1	0.241	1	0.106	1	lipid kinase activity	F
GO:0001738	12	0.851	1	0.161	1	0.908	1	0.232	1	0.595	1	0.243	1	0.857	1	0.286	1	morphogenesis of a polarized epithelium	P
GO:0001739	14	0.00367	0.212	0.037	1	0.013	0.653	0.0157	0.647	0.056	1	0.11	1	0.0071	0.275	0.286	1	sex chromatin	C
GO:0001750	17	0.288	1	0.224	1	0.687	1	0.339	1	0.216	1	0.129	1	0.132	1	0.3	1	photoreceptor outer segment	C
GO:0001754	15	0.351	1	0.13	1	0.293	1	0.241	1	0.373	1	0.147	1	0.52	1	0.0998	1	eye photoreceptor cell differentiation	P
GO:0001755	23	0.929	1	0.994	1	0.867	1	0.912	1	0.806	1	0.98	1	0.939	1	0.999	1	neural crest cell migration	P
GO:0001756	35	0.928	1	0.556	1	0.57	1	0.442	1	0.908	1	0.534	1	0.974	1	0.908	1	somitogenesis	P
GO:0001759	14	0.719	1	0.845	1	0.885	1	0.504	1	0.526	1	0.971	1	0.636	1	0.813	1	induction of an organ	P
GO:0001763	76	0.544	1	0.976	1	0.904	1	0.999	1	0.949	1	0.992	1	0.0286	0.838	0.289	1	morphogenesis of a branching structure	P
GO:0001764	67	0.781	1	0.978	1	0.979	1	0.974	1	0.73	1	0.903	1	0.221	1	0.971	1	neuron migration	P
GO:0001772	24	0.5	1	0.215	1	0.413	1	0.38	1	0.641	1	0.322	1	0.39	1	0.128	1	immunological synapse	C
GO:0001775	293	0.0165	1	8.31e-05	0.015	0.156	1	0.00194	0.139	0.454	1	0.0398	1	8.23e-05	0.008	2.49e-05	0.007	cell activation	P
GO:0001776	37	0.065	1	0.0179	1	0.0724	1	0.119	1	0.292	1	0.00589	0.421	0.0711	1	0.11	1	leukocyte homeostasis	P
GO:0001782	13	0.276	1	0.446	1	0.292	1	0.552	1	0.344	1	0.174	1	0.421	1	0.655	1	B cell homeostasis	P
GO:0001816	119	0.0864	1	0.054	1	0.673	1	0.502	1	0.382	1	0.485	1	0.00242	0.084	0.0026	0.0832	cytokine production	P
GO:0001817	13	0.614	1	0.549	1	0.854	1	0.755	1	0.622	1	0.791	1	0.327	1	0.273	1	regulation of cytokine production	P
GO:0001822	87	0.995	1	0.898	1	0.998	1	0.994	1	0.991	1	0.771	1	0.697	1	0.625	1	kidney development	P
GO:0001824	41	5.68e-05	0.012	3.16e-05	0.007	7.54e-05	0.0116	7e-05	0.013	0.000326	0.049	0.0147	0.668	0.0519	1	0.00157	0.06	blastocyst development	P
GO:0001825	14	0.0316	1	0.00735	0.312	0.0124	0.653	0.00358	0.257	0.179	1	0.296	1	0.407	1	0.00161	0.06	blastocyst formation	P
GO:0001829	11	0.0202	1	0.0225	1	0.00306	0.135	0.0114	0.647	0.186	1	0.36	1	0.371	1	0.00696	0.428	trophectodermal cell differentiation	P
GO:0001832	15	0.0119	0.608	0.00547	0.308	0.0122	0.653	0.00165	0.096	0.024	1	0.0523	1	0.179	1	0.0479	1	blastocyst growth	P
GO:0001836	17	8.34e-06	0.00362	7.88e-05	0.015	2.13e-05	0.003	0.00027	0.042	0.00363	0.213	0.000253	0.0233	0.00029	0.0229	0.0228	0.999	release of cytochrome c from mitochondria	P
GO:0001837	11	0.259	1	0.263	1	0.149	1	0.272	1	0.937	1	0.253	1	0.00535	0.223	0.173	1	epithelial to mesenchymal transition	P
GO:0001838	49	0.187	1	0.165	1	0.241	1	0.206	1	0.0976	1	0.342	1	0.317	1	0.0979	1	embryonic epithelial tube formation	P
GO:0001839	49	0.166	1	0.0219	1	0.26	1	0.0653	1	0.0923	1	0.22	1	0.251	1	0.00716	0.428	neural plate morphogenesis	P
GO:0001841	45	0.199	1	0.0618	1	0.288	1	0.13	1	0.069	1	0.18	1	0.383	1	0.0416	1	neural tube formation	P
GO:0001843	33	0.355	1	0.0731	1	0.406	1	0.114	1	0.186	1	0.0876	1	0.541	1	0.118	1	neural tube closure	P
GO:0001871	103	0.793	1	0.759	1	0.726	1	0.958	1	0.769	1	0.69	1	0.79	1	0.291	1	pattern binding	F
GO:0001889	34	0.052	1	0.0012	0.0965	0.156	1	0.00554	0.288	0.0661	1	0.0334	1	0.125	1	0.0241	0.999	liver development	P
GO:0001890	42	0.0017	0.212	0.000679	0.059	0.00281	0.135	0.00102	0.094	0.0584	1	0.0581	1	0.0213	0.636	0.0191	0.736	placenta development	P
GO:0001892	20	0.00431	0.214	0.00399	0.188	0.000288	0.04	0.00262	0.161	0.239	1	0.303	1	0.0842	1	0.00127	0.06	embryonic placenta development	P
GO:0001894	47	0.304	1	0.0314	1	0.272	1	0.284	1	0.675	1	0.00936	0.503	0.171	1	0.0574	1	tissue homeostasis	P
GO:0001906	32	0.92	1	0.807	1	0.778	1	0.676	1	0.75	1	0.598	1	0.982	1	0.98	1	cell killing	P
GO:0001909	31	0.884	1	0.786	1	0.718	1	0.671	1	0.696	1	0.537	1	0.971	1	0.971	1	leukocyte mediated cytotoxicity	P
GO:0001910	23	0.997	1	0.999	1	0.984	1	0.992	1	0.98	1	0.993	1	0.975	1	0.998	1	regulation of leukocyte mediated cytotoxicity	P
GO:0001912	17	0.998	1	0.996	1	0.999	1	0.988	1	0.968	1	0.979	1	0.95	1	0.986	1	positive regulation of leukocyte mediated cytotoxicity	P
GO:0001932	97	0.885	1	0.511	1	0.932	1	0.798	1	0.986	1	0.513	1	0.16	1	0.132	1	regulation of protein amino acid phosphorylation	P
GO:0001933	15	0.936	1	0.52	1	0.863	1	0.521	1	0.863	1	0.397	1	0.952	1	0.615	1	negative regulation of protein amino acid phosphorylation	P
GO:0001934	47	0.626	1	0.308	1	0.87	1	0.482	1	0.91	1	0.277	1	0.0692	1	0.166	1	positive regulation of protein amino acid phosphorylation	P
GO:0001935	28	0.318	1	0.187	1	0.725	1	0.572	1	0.426	1	0.199	1	0.13	1	0.133	1	endothelial cell proliferation	P
GO:0001936	22	0.528	1	0.399	1	0.88	1	0.592	1	0.622	1	0.502	1	0.224	1	0.255	1	regulation of endothelial cell proliferation	P
GO:0001937	14	0.211	1	0.339	1	0.5	1	0.272	1	0.321	1	0.516	1	0.101	1	0.371	1	negative regulation of endothelial cell proliferation	P
GO:0001942	43	0.341	1	0.29	1	0.886	1	0.474	1	0.436	1	0.324	1	0.0192	0.636	0.0868	1	hair follicle development	P
GO:0001944	247	0.193	1	0.167	1	0.64	1	0.674	1	0.448	1	0.347	1	0.0462	1	0.0073	0.428	vasculature development	P
GO:0001947	16	0.165	1	0.138	1	0.286	1	0.139	1	0.105	1	0.324	1	0.657	1	0.11	1	heart looping	P
GO:0001948	14	0.178	1	0.0994	1	0.397	1	0.299	1	0.409	1	0.24	1	0.0522	1	0.0201	0.736	glycoprotein binding	F
GO:0001952	18	0.359	1	0.431	1	0.539	1	0.678	1	0.37	1	0.254	1	0.286	1	0.328	1	regulation of cell-matrix adhesion	P
GO:0001958	10	0.469	1	0.842	1	0.574	1	0.241	1	0.445	1	0.908	1	0.41	1	1	1	endochondral ossification	P
GO:0001963	13	0.976	1	0.999	1	0.796	1	0.999	1	1	1	0.949	1	0.644	1	0.986	1	synaptic transmission, dopaminergic	P
GO:0001964	11	0.977	1	0.961	1	0.829	1	0.957	1	0.991	1	0.795	1	0.969	1	0.905	1	startle response	P
GO:0001974	18	0.953	1	0.809	1	0.996	1	0.972	1	0.991	1	0.855	1	0.429	1	0.23	1	blood vessel remodeling	P
GO:0001975	11	0.28	1	0.492	1	0.407	1	0.727	1	0.654	1	0.422	1	6.95e-05	0.008	0.309	1	response to amphetamine	P
GO:0001976	22	0.907	1	1	1	0.922	1	1	1	0.843	1	1	1	0.561	1	0.864	1	fast regulation of arterial pressure	P
GO:0001990	18	0.9	1	1	1	0.973	1	1	1	0.663	1	1	1	0.672	1	0.924	1	regulation of blood pressure by hormones	P
GO:0002009	141	0.485	1	0.317	1	0.515	1	0.794	1	0.576	1	0.451	1	0.271	1	0.00871	0.428	morphogenesis of an epithelium	P
GO:0002026	12	0.265	1	0.49	1	0.422	1	0.605	1	0.778	1	0.691	1	0.0714	1	0.212	1	cardiac inotropy	P
GO:0002053	15	0.982	1	0.704	1	0.925	1	1	1	0.947	1	0.231	1	0.684	1	0.419	1	positive regulation of mesenchymal cell proliferation	P
GO:0002062	21	0.391	1	0.898	1	0.522	1	0.745	1	0.596	1	0.854	1	0.192	1	0.799	1	chondrocyte differentiation	P
GO:0002064	14	0.349	1	0.761	1	0.999	1	0.979	1	0.144	1	0.826	1	0.172	1	0.135	1	epithelial cell development	P
GO:0002076	10	0.263	1	0.359	1	0.402	1	0.424	1	0.473	1	0.57	1	0.164	1	0.183	1	osteoblast development	P
GO:0002088	13	0.314	1	0.446	1	0.206	1	0.696	1	0.824	1	0.181	1	0.282	1	0.563	1	lens development (sensu Vertebrata)	P
GO:0002200	30	0.247	1	0.00852	0.469	0.444	1	0.00711	0.492	0.327	1	0.302	1	0.21	1	0.0376	1	somatic diversification of immune receptors	P
GO:0002204	25	0.254	1	0.00607	0.308	0.419	1	0.00287	0.161	0.275	1	0.416	1	0.269	1	0.0413	1	somatic recombination of immunoglobulin genes during immune response	P
GO:0002208	25	0.254	1	0.00607	0.308	0.419	1	0.00287	0.161	0.275	1	0.416	1	0.269	1	0.0413	1	somatic diversification of immunoglobulins during immune response	P
GO:0002209	12	0.558	1	0.35	1	0.79	1	0.843	1	0.278	1	0.145	1	0.55	1	0.466	1	behavioral defense response	P
GO:0002217	434	0.999	1	1	1	1	1	0.999	1	1	1	1	1	0.199	1	0.554	1	physiological defense response	P
GO:0002228	20	0.825	1	0.535	1	0.633	1	0.452	1	0.664	1	0.317	1	0.947	1	0.861	1	natural killer cell mediated immunity	P
GO:0002245	452	0.9	1	0.819	1	0.982	1	0.851	1	0.991	1	0.926	1	0.141	1	0.187	1	physiological response to wounding	P
GO:0002250	160	0.469	1	0.443	1	0.714	1	0.152	1	0.886	1	0.896	1	0.083	1	0.341	1	adaptive immune response	P
GO:0002252	194	0.353	1	0.588	1	0.542	1	0.294	1	0.905	1	0.834	1	0.035	0.838	0.513	1	immune effector process	P
GO:0002253	81	0.592	1	0.572	1	0.721	1	0.643	1	0.956	1	0.627	1	0.279	1	0.45	1	activation of immune response	P
GO:0002260	29	0.0631	1	0.0188	1	0.0902	1	0.16	1	0.525	1	0.00347	0.151	0.0378	0.838	0.195	1	lymphocyte homeostasis	P
GO:0002263	19	0.0108	0.608	0.00701	0.312	0.0543	1	0.0107	0.572	0.326	1	0.184	1	0.00532	0.223	0.0188	0.736	cell activation during immune response	P
GO:0002274	33	0.127	1	0.552	1	0.499	1	0.597	1	0.811	1	0.952	1	0.00392	0.223	0.155	1	myeloid leukocyte activation	P
GO:0002285	17	0.036	1	0.0319	1	0.0572	1	0.0392	1	0.497	1	0.21	1	0.0132	0.478	0.0759	1	lymphocyte activation during immune response	P
GO:0002286	15	0.0581	1	0.0562	1	0.127	1	0.0642	1	0.441	1	0.276	1	0.0225	0.636	0.138	1	T cell activation during immune response	P
GO:0002292	13	0.0599	1	0.0742	1	0.144	1	0.0956	1	0.431	1	0.397	1	0.0136	0.478	0.114	1	T cell differentiation during immune response	P
GO:0002293	13	0.0599	1	0.0742	1	0.144	1	0.0956	1	0.431	1	0.397	1	0.0136	0.478	0.114	1	alpha-beta T cell differentiation during immune response	P
GO:0002294	13	0.0599	1	0.0742	1	0.144	1	0.0956	1	0.431	1	0.397	1	0.0136	0.478	0.114	1	CD4-positive, alpha-beta T cell differentiation during immune response	P
GO:0002366	19	0.0108	0.608	0.00701	0.312	0.0543	1	0.0107	0.572	0.326	1	0.184	1	0.00532	0.223	0.0188	0.736	leukocyte activation during immune response	P
GO:0002367	10	0.851	1	0.926	1	0.88	1	0.998	1	0.699	1	0.657	1	0.679	1	0.656	1	cytokine production during immune response	P
GO:0002376	859	0.04	1	0.0305	1	0.0707	1	0.128	1	0.86	1	0.193	1	0.000127	0.008	0.00685	0.428	immune system process	P
GO:0002377	43	0.153	1	0.0128	0.607	0.495	1	0.0324	1	0.406	1	0.319	1	0.0372	0.838	0.0252	0.999	immunoglobulin production	P
GO:0002381	27	0.213	1	0.0054	0.308	0.525	1	0.00215	0.139	0.302	1	0.428	1	0.159	1	0.0375	1	immunoglobulin production during immune response	P
GO:0002429	40	0.764	1	0.259	1	0.573	1	0.627	1	0.93	1	0.0325	1	0.66	1	0.636	1	immune response-activating cell surface receptor signaling pathway	P
GO:0002437	66	0.965	1	0.792	1	0.791	1	0.487	1	0.998	1	0.814	1	0.766	1	0.8	1	inflammatory response to antigenic stimulus	P
GO:0002438	59	0.995	1	0.94	1	0.962	1	0.783	1	0.999	1	0.963	1	0.831	1	0.856	1	acute inflammatory response to antigenic stimulus	P
GO:0002440	48	0.222	1	0.0324	1	0.645	1	0.0809	1	0.371	1	0.363	1	0.0918	1	0.0335	1	production of molecular mediator of immune response	P
GO:0002443	172	0.488	1	0.614	1	0.64	1	0.218	1	0.925	1	0.874	1	0.0665	1	0.645	1	leukocyte mediated immunity	P
GO:0002444	16	0.312	1	0.524	1	0.497	1	0.64	1	0.684	1	0.766	1	0.125	1	0.154	1	myeloid leukocyte mediated immunity	P
GO:0002449	162	0.619	1	0.631	1	0.713	1	0.191	1	0.92	1	0.858	1	0.187	1	0.757	1	lymphocyte mediated immunity	P
GO:0002455	34	0.572	1	0.861	1	0.754	1	0.596	1	0.873	1	0.998	1	0.239	1	0.482	1	humoral immune response mediated by circulating immunoglobulin	P
GO:0002456	18	0.203	1	0.0863	1	0.483	1	0.201	1	0.197	1	0.0456	1	0.121	1	0.205	1	T cell mediated immunity	P
GO:0002460	160	0.469	1	0.443	1	0.714	1	0.152	1	0.886	1	0.896	1	0.083	1	0.341	1	adaptive immune response (sensu Gnathostomata)	P
GO:0002474	18	0.428	1	0.755	1	0.0216	1	0.644	1	0.595	1	0.192	1	0.756	1	0.996	1	antigen processing and presentation of peptide antigen via MHC class I	P
GO:0002478	18	0.0265	1	0.149	1	0.111	1	0.181	1	0.171	1	0.0771	1	0.136	1	0.72	1	antigen processing and presentation of exogenous peptide antigen	P
GO:0002495	16	0.0293	1	0.0809	1	0.152	1	0.114	1	0.19	1	0.0631	1	0.0699	1	0.658	1	antigen processing and presentation of peptide antigen via MHC class II	P
GO:0002504	18	0.0865	1	0.14	1	0.261	1	0.204	1	0.195	1	0.0757	1	0.175	1	0.702	1	antigen processing and presentation of peptide or polysaccharide antigen via MHC class II	P
GO:0002520	319	0.000332	0.031	0.00232	0.171	0.000175	0.0116	0.00285	0.161	0.329	1	0.187	1	5.74e-05	0.008	0.00508	0.201	immune system development	P
GO:0002521	164	0.0699	1	0.0475	1	0.0745	1	0.143	1	0.634	1	0.387	1	0.015	0.478	0.0295	0.999	leukocyte differentiation	P
GO:0002524	59	0.995	1	0.94	1	0.962	1	0.783	1	0.999	1	0.963	1	0.831	1	0.856	1	hypersensitivity	P
GO:0002526	128	0.985	1	0.995	1	0.957	1	0.836	1	1	1	1	1	0.845	1	0.898	1	acute inflammatory response	P
GO:0002541	37	0.469	1	0.922	1	0.647	1	0.612	1	0.921	1	0.997	1	0.222	1	0.594	1	activation of plasma proteins during acute inflammatory response	P
GO:0002562	28	0.224	1	0.00221	0.171	0.426	1	0.00386	0.288	0.351	1	0.221	1	0.15	1	0.0151	0.656	somatic diversification of immune receptors via germline recombination within a single locus	P
GO:0002573	54	0.162	1	0.554	1	0.117	1	0.421	1	0.445	1	0.601	1	0.176	1	0.905	1	myeloid leukocyte differentiation	P
GO:0002673	10	0.979	1	0.497	1	0.956	1	0.548	1	0.861	1	0.535	1	0.924	1	0.369	1	regulation of acute inflammatory response	P
GO:0002682	127	0.552	1	0.528	1	0.702	1	0.631	1	0.964	1	0.748	1	0.117	1	0.161	1	regulation of immune system process	P
GO:0002683	12	0.0942	1	0.183	1	0.0621	1	0.0568	1	0.227	1	0.486	1	0.308	1	0.139	1	negative regulation of immune system process	P
GO:0002684	108	0.619	1	0.726	1	0.797	1	0.817	1	0.968	1	0.679	1	0.199	1	0.555	1	positive regulation of immune system process	P
GO:0002697	25	0.999	1	0.793	1	0.99	1	0.802	1	0.999	1	0.718	1	0.779	1	0.719	1	regulation of immune effector process	P
GO:0002699	21	1	1	0.915	1	1	1	0.923	1	1	1	0.842	1	0.697	1	0.817	1	positive regulation of immune effector process	P
GO:0002703	24	0.999	1	0.763	1	0.983	1	0.758	1	0.999	1	0.685	1	0.749	1	0.723	1	regulation of leukocyte mediated immunity	P
GO:0002705	20	1	1	0.895	1	1	1	0.896	1	1	1	0.814	1	0.661	1	0.82	1	positive regulation of leukocyte mediated immunity	P
GO:0002706	24	0.999	1	0.763	1	0.983	1	0.758	1	0.999	1	0.685	1	0.749	1	0.723	1	regulation of lymphocyte mediated immunity	P
GO:0002708	20	1	1	0.895	1	1	1	0.896	1	1	1	0.814	1	0.661	1	0.82	1	positive regulation of lymphocyte mediated immunity	P
GO:0002712	14	0.993	1	0.934	1	0.853	1	0.795	1	1	1	0.969	1	0.851	1	0.784	1	regulation of B cell mediated immunity	P
GO:0002714	11	0.997	1	0.893	1	0.996	1	0.826	1	0.997	1	0.931	1	0.745	1	0.661	1	positive regulation of B cell mediated immunity	P
GO:0002757	44	0.671	1	0.205	1	0.674	1	0.596	1	0.857	1	0.0616	1	0.486	1	0.351	1	immune response-activating signal transduction	P
GO:0002761	24	0.287	1	0.508	1	0.191	1	0.504	1	0.367	1	0.39	1	0.476	1	0.899	1	regulation of myeloid leukocyte differentiation	P
GO:0002762	10	0.531	1	0.693	1	0.378	1	0.756	1	0.592	1	0.7	1	0.573	1	0.654	1	negative regulation of myeloid leukocyte differentiation	P
GO:0002763	11	0.509	1	0.804	1	0.552	1	0.569	1	0.41	1	0.693	1	0.52	1	0.992	1	positive regulation of myeloid leukocyte differentiation	P
GO:0002764	47	0.692	1	0.227	1	0.701	1	0.541	1	0.878	1	0.0756	1	0.418	1	0.441	1	immune response-regulating signal transduction	P
GO:0002768	43	0.782	1	0.285	1	0.606	1	0.57	1	0.942	1	0.0419	1	0.584	1	0.726	1	immune response-regulating cell surface receptor signaling pathway	P
GO:0002790	49	0.256	1	0.151	1	0.438	1	0.481	1	0.526	1	0.321	1	0.0356	0.838	0.0129	0.476	peptide secretion	P
GO:0002819	26	0.504	1	0.354	1	0.848	1	0.359	1	0.422	1	0.492	1	0.348	1	0.23	1	regulation of adaptive immune response	P
GO:0002821	20	0.598	1	0.509	1	0.951	1	0.534	1	0.565	1	0.575	1	0.269	1	0.375	1	positive regulation of adaptive immune response	P
GO:0002822	26	0.504	1	0.354	1	0.848	1	0.359	1	0.422	1	0.492	1	0.348	1	0.23	1	regulation of adaptive immune response (sensu Gnathostomata)	P
GO:0002824	20	0.598	1	0.509	1	0.951	1	0.534	1	0.565	1	0.575	1	0.269	1	0.375	1	positive regulation of adaptive immune response (sensu Gnathostomata)	P
GO:0002861	14	0.739	1	0.243	1	0.587	1	0.187	1	0.723	1	0.299	1	0.85	1	0.275	1	regulation of inflammatory response to antigenic stimulus	P
GO:0002863	10	0.99	1	0.498	1	0.995	1	0.493	1	0.897	1	0.476	1	0.908	1	0.502	1	positive regulation of inflammatory response to antigenic stimulus	P
GO:0002864	10	0.979	1	0.497	1	0.956	1	0.548	1	0.861	1	0.535	1	0.924	1	0.369	1	regulation of acute inflammatory response to antigenic stimulus	P
GO:0002883	10	0.979	1	0.497	1	0.956	1	0.548	1	0.861	1	0.535	1	0.924	1	0.369	1	regulation of hypersensitivity	P
GO:0002889	14	0.993	1	0.934	1	0.853	1	0.795	1	1	1	0.969	1	0.851	1	0.784	1	regulation of immunoglobulin mediated immune response	P
GO:0002891	11	0.997	1	0.893	1	0.996	1	0.826	1	0.997	1	0.931	1	0.745	1	0.661	1	positive regulation of immunoglobulin mediated immune response	P
GO:0003674	17517	5.36e-36	0	0	0	8.06e-39	0	0	0	1.1e-29	0	0	0	0.000297	0.0229	8.15e-40	0	molecular_function	F
GO:0003676	3584	1.22e-39	0	0	0	0	0	0	0	2.04e-27	0	3.41e-30	0	4.24e-05	0.008	1.32e-08	0	nucleic acid binding	F
GO:0003677	2339	6.52e-21	0	1.72e-21	0	3.07e-24	0	5.41e-25	0	7.43e-13	0	2.81e-13	0.00062	0.000346	0.0229	3.14e-06	0.002	DNA binding	F
GO:0003678	25	0.00736	0.315	3.48e-05	0.007	0.00283	0.135	0.000354	0.042	0.042	1	9.95e-05	0.011	0.146	1	0.0511	1	DNA helicase activity	F
GO:0003682	132	1.55e-06	0.00276	2.98e-07	0.00392	2.11e-06	0.002	3.71e-07	0.00289	0.00287	0.213	0.000531	0.032	0.0015	0.0614	0.000389	0.03	chromatin binding	F
GO:0003684	35	0.23	1	0.00887	0.469	0.2	1	0.00383	0.288	0.147	1	0.197	1	0.694	1	0.0153	0.656	damaged DNA binding	F
GO:0003690	43	0.0184	1	0.111	1	0.0118	0.653	0.147	1	0.153	1	0.141	1	0.0637	1	0.256	1	double-stranded DNA binding	F
GO:0003697	40	0.000197	0.0172	0.000182	0.018	6.04e-05	0.00982	6.35e-05	0.013	0.0159	0.692	0.0141	0.668	0.0302	0.838	0.212	1	single-stranded DNA binding	F
GO:0003700	927	0.00252	0.212	0.0169	0.763	0.0151	0.653	0.0371	1	0.0507	1	0.146	1	0.00646	0.275	0.0169	0.656	transcription factor activity	F
GO:0003702	100	0.209	1	0.157	1	0.11	1	0.0777	1	0.648	1	0.267	1	0.293	1	0.723	1	RNA polymerase II transcription factor activity	F
GO:0003705	28	0.998	1	0.934	1	0.996	1	0.939	1	1	1	0.988	1	0.67	1	0.698	1	RNA polymerase II transcription factor activity, enhancer binding	F
GO:0003707	53	0.506	1	0.366	1	0.656	1	0.541	1	0.459	1	0.457	1	0.476	1	0.179	1	steroid hormone receptor activity	F
GO:0003708	25	0.833	1	0.531	1	0.426	1	0.342	1	0.804	1	0.683	1	0.94	1	0.651	1	retinoic acid receptor activity	F
GO:0003711	13	0.000904	0.0886	0.189	1	0.0314	1	0.139	1	0.0253	1	0.124	1	0.00726	0.275	0.895	1	transcriptional elongation regulator activity	F
GO:0003712	172	1.92e-07	0.00257	2.56e-11	0	8.73e-09	0.00098	2.63e-09	0	0.000714	0.12	4.44e-06	0.0029	0.00624	0.275	9.96e-06	0.007	transcription cofactor activity	F
GO:0003713	96	0.000258	0.019	3.1e-08	0.000959	9.21e-06	0.00291	2.05e-06	0.00289	0.00309	0.213	3.73e-05	0.00966	0.249	1	0.000529	0.03	transcription coactivator activity	F
GO:0003714	64	0.00038	0.031	0.000277	0.044	0.00136	0.079	0.00141	0.094	0.0278	1	0.00938	0.503	0.00902	0.275	0.0053	0.201	transcription corepressor activity	F
GO:0003723	675	8.08e-35	0	1.39e-35	0	6.41e-32	0	2.33e-33	0	3.71e-21	0	5.12e-20	0	2.04e-11	0	1.61e-10	0	RNA binding	F
GO:0003725	37	0.0012	0.0886	0.00847	0.469	0.0204	1	0.036	1	0.0138	0.692	0.0697	1	0.0183	0.636	0.0115	0.476	double-stranded RNA binding	F
GO:0003727	20	0.00133	0.0886	0.0184	1	0.00104	0.079	0.122	1	0.16	1	0.0934	1	0.0434	1	0.00241	0.079	single-stranded RNA binding	F
GO:0003729	45	0.0589	1	0.0134	0.607	0.0332	1	0.00462	0.288	0.115	1	0.0447	1	0.345	1	0.468	1	mRNA binding	F
GO:0003735	453	3.27e-09	0.00257	0.0136	0.607	2.16e-09	0.00098	0.0172	0.647	4.14e-07	0.000959	0.00708	0.421	0.00177	0.084	0.242	1	structural constituent of ribosome	F
GO:0003743	89	6.18e-07	0.00276	1.47e-10	0	2.41e-10	0.000795	1.15e-07	0.00289	0.000377	0.049	1e-08	0.000878	0.0265	0.838	0.00131	0.06	translation initiation factor activity	F
GO:0003746	37	0.146	1	0.0244	1	0.0527	1	0.0501	1	0.181	1	0.069	1	0.618	1	0.0639	1	translation elongation factor activity	F
GO:0003755	38	8.39e-05	0.0143	0.00411	0.188	0.00861	0.653	0.00224	0.139	0.000353	0.049	0.156	1	0.000914	0.0344	0.0483	1	peptidyl-prolyl cis-trans isomerase activity	F
GO:0003774	167	0.000642	0.0886	5.6e-05	0.007	0.00333	0.203	0.00312	0.161	0.0615	1	0.00958	0.503	0.000401	0.024	9e-05	0.016	motor activity	F
GO:0003777	81	0.00215	0.212	0.000967	0.087	0.000409	0.04	0.00449	0.288	0.0728	1	0.00917	0.503	0.019	0.636	0.0191	0.736	microtubule motor activity	F
GO:0003779	309	2.33e-06	0.003	3.86e-11	0	0.0188	1	2.69e-05	0.00957	0.00257	0.129	1.41e-05	0.00587	9.26e-08	0	3.01e-11	0	actin binding	F
GO:0003796	11	0.488	1	0.62	1	0.802	1	0.897	1	0.245	1	0.0684	1	0.801	1	0.968	1	lysozyme activity	F
GO:0003810	11	0.998	1	0.689	1	0.992	1	0.887	1	0.925	1	0.224	1	0.952	1	0.88	1	protein-glutamine gamma-glutamyltransferase activity	F
GO:0003823	54	1	1	1	1	1	1	1	1	1	1	1	1	1	1	1	1	antigen binding	F
GO:0003824	5977	0	0	0	0	5.24e-42	0	0	0	3.64e-33	0	0	0	2.3e-12	0	1.48e-37	0	catalytic activity	F
GO:0003854	20	0.77	1	0.841	1	0.99	1	0.573	1	0.25	1	0.771	1	0.748	1	0.818	1	3-beta-hydroxy-delta5-steroid dehydrogenase activity	F
GO:0003887	32	0.0184	1	0.216	1	0.0115	0.653	0.0834	1	0.0457	1	0.448	1	0.138	1	0.587	1	DNA-directed DNA polymerase activity	F
GO:0003899	39	6.76e-06	0.00362	9.35e-05	0.015	1.89e-09	0.00098	1.87e-06	0.00289	0.000649	0.12	0.00923	0.503	0.114	1	0.0537	1	DNA-directed RNA polymerase activity	F
GO:0003916	21	0.065	1	0.0729	1	0.0147	0.653	0.0835	1	0.049	1	0.221	1	0.993	1	0.183	1	DNA topoisomerase activity	F
GO:0003918	17	0.0682	1	0.0304	1	0.0178	1	0.137	1	0.0763	1	0.183	1	0.961	1	0.0356	1	DNA topoisomerase (ATP-hydrolyzing) activity	F
GO:0003924	241	0.00133	0.0886	3.93e-06	0.00451	0.00199	0.095	0.000431	0.042	0.0015	0.12	5.67e-05	0.00966	0.0819	1	0.000232	0.0233	GTPase activity	F
GO:0003950	19	0.000484	0.044	0.00714	0.312	0.0137	0.653	0.0139	0.647	0.00356	0.213	0.00248	0.127	0.0523	1	0.321	1	NAD+ ADP-ribosyltransferase activity	F
GO:0003954	45	0.0945	1	0.341	1	0.158	1	0.505	1	0.148	1	0.278	1	0.271	1	0.447	1	NADH dehydrogenase activity	F
GO:0003993	16	0.175	1	0.0298	1	0.255	1	0.0127	0.647	0.16	1	0.119	1	0.194	1	0.11	1	acid phosphatase activity	F
GO:0003995	17	0.0159	1	0.0454	1	0.0583	1	0.0782	1	0.0199	0.79	0.0474	1	0.235	1	0.294	1	acyl-CoA dehydrogenase activity	F
GO:0004003	14	0.0432	1	0.000956	0.087	0.0424	1	0.0449	1	0.0344	1	0.000171	0.0233	0.253	1	0.159	1	ATP-dependent DNA helicase activity	F
GO:0004012	16	0.981	1	0.68	1	0.854	1	0.551	1	1	1	0.568	1	0.88	1	0.871	1	phospholipid-translocating ATPase activity	F
GO:0004016	11	0.543	1	0.253	1	0.845	1	0.601	1	0.479	1	0.239	1	0.408	1	0.159	1	adenylate cyclase activity	F
GO:0004022	35	0.894	1	0.511	1	0.821	1	0.828	1	0.867	1	0.253	1	0.623	1	0.299	1	alcohol dehydrogenase activity	F
GO:0004033	11	0.162	1	0.417	1	0.292	1	0.55	1	0.0429	1	0.176	1	0.526	1	0.811	1	aldo-keto reductase activity	F
GO:0004089	19	0.521	1	0.368	1	0.49	1	0.812	1	0.332	1	0.187	1	0.965	1	0.34	1	carbonate dehydratase activity	F
GO:0004091	37	0.979	1	0.748	1	0.946	1	0.687	1	0.911	1	0.721	1	0.969	1	0.512	1	carboxylesterase activity	F
GO:0004104	18	1	1	0.998	1	1	1	0.978	1	1	1	1	1	0.81	1	0.824	1	cholinesterase activity	F
GO:0004112	27	0.96	1	0.891	1	0.92	1	0.898	1	0.976	1	0.966	1	0.974	1	0.662	1	cyclic-nucleotide phosphodiesterase activity	F
GO:0004114	25	0.986	1	0.974	1	0.966	1	0.979	1	0.997	1	0.978	1	0.966	1	0.838	1	3',5'-cyclic-nucleotide phosphodiesterase activity	F
GO:0004129	30	0.165	1	0.239	1	0.0887	1	0.0595	1	0.203	1	0.269	1	0.578	1	0.657	1	cytochrome-c oxidase activity	F
GO:0004143	15	0.293	1	0.791	1	0.331	1	0.575	1	0.626	1	0.983	1	0.184	1	0.43	1	diacylglycerol kinase activity	F
GO:0004175	511	0.476	1	0.205	1	0.798	1	0.308	1	0.419	1	0.446	1	0.263	1	0.0213	0.999	endopeptidase activity	F
GO:0004176	17	0.27	1	0.497	1	0.414	1	0.422	1	0.213	1	0.471	1	0.35	1	0.367	1	ATP-dependent peptidase activity	F
GO:0004177	42	0.19	1	0.108	1	0.0458	1	0.309	1	0.17	1	0.043	1	0.782	1	0.293	1	aminopeptidase activity	F
GO:0004179	12	0.685	1	0.304	1	0.338	1	0.429	1	0.726	1	0.324	1	0.829	1	0.154	1	membrane alanyl aminopeptidase activity	F
GO:0004180	47	0.832	1	0.812	1	0.411	1	0.6	1	0.966	1	0.933	1	0.523	1	0.485	1	carboxypeptidase activity	F
GO:0004181	33	0.806	1	0.57	1	0.762	1	0.532	1	0.965	1	0.634	1	0.205	1	0.243	1	metallocarboxypeptidase activity	F
GO:0004182	30	0.815	1	0.573	1	0.802	1	0.687	1	0.985	1	0.536	1	0.16	1	0.214	1	carboxypeptidase A activity	F
GO:0004190	33	0.213	1	0.0987	1	0.32	1	0.358	1	0.0625	1	0.302	1	0.458	1	0.0301	0.999	aspartic-type endopeptidase activity	F
GO:0004197	97	0.228	1	0.0758	1	0.313	1	0.0677	1	0.345	1	0.318	1	0.227	1	0.0521	1	cysteine-type endopeptidase activity	F
GO:0004198	16	0.41	1	0.185	1	0.619	1	0.388	1	0.601	1	0.192	1	0.101	1	0.26	1	calpain activity	F
GO:0004221	67	0.0365	1	5.97e-05	0.007	0.00339	0.203	1.01e-05	0.00289	0.108	1	0.00949	0.503	0.72	1	0.00246	0.079	ubiquitin thiolesterase activity	F
GO:0004222	119	0.708	1	0.809	1	0.974	1	0.807	1	0.653	1	0.758	1	0.181	1	0.598	1	metalloendopeptidase activity	F
GO:0004252	233	0.693	1	0.446	1	0.888	1	0.566	1	0.672	1	0.574	1	0.447	1	0.0705	1	serine-type endopeptidase activity	F
GO:0004263	15	0.738	1	0.418	1	0.85	1	0.613	1	0.311	1	0.251	1	0.855	1	0.348	1	chymotrypsin activity	F
GO:0004289	21	0.913	1	0.705	1	0.777	1	0.836	1	0.978	1	0.866	1	0.875	1	0.481	1	subtilase activity	F
GO:0004293	13	1	1	0.0317	1	1	1	1.38e-10	0	1	1	1	1	0.000626	0.0344	0.00262	0.0832	tissue kallikrein activity	F
GO:0004295	19	0.953	1	0.724	1	0.964	1	0.766	1	0.663	1	0.556	1	0.913	1	0.555	1	trypsin activity	F
GO:0004298	22	0.297	1	0.204	1	0.0871	1	0.174	1	0.65	1	0.0251	1	0.706	1	0.892	1	threonine endopeptidase activity	F
GO:0004303	10	0.201	1	0.161	1	0.447	1	0.41	1	0.178	1	0.215	1	0.135	1	0.0416	1	estradiol 17-beta-dehydrogenase activity	F
GO:0004364	29	0.68	1	0.833	1	0.472	1	0.971	1	0.377	1	0.087	1	0.983	1	0.983	1	glutathione transferase activity	F
GO:0004365	30	0.982	1	0.865	1	0.879	1	0.974	1	0.999	1	0.498	1	0.881	1	0.742	1	glyceraldehyde-3-phosphate dehydrogenase (phosphorylating) activity	F
GO:0004383	11	0.237	1	0.599	1	0.745	1	0.487	1	0.116	1	0.829	1	0.0261	0.838	0.49	1	guanylate cyclase activity	F
GO:0004386	145	3.57e-09	0.00257	3.86e-11	0	1.51e-09	0.00098	1.68e-11	0	7.21e-05	0.024	4.57e-07	0.00165	0.0684	1	0.00019	0.016	helicase activity	F
GO:0004396	10	0.0038	0.212	0.000892	0.087	0.119	1	0.0474	1	0.017	0.692	0.0139	0.668	0.00253	0.084	0.16	1	hexokinase activity	F
GO:0004402	21	0.0214	1	0.000405	0.0474	0.0733	1	0.000628	0.042	0.0893	1	0.00777	0.421	0.418	1	0.00448	0.201	histone acetyltransferase activity	F
GO:0004407	19	0.0164	1	0.021	1	0.0681	1	0.0155	0.647	0.0269	1	0.21	1	0.0594	1	0.201	1	histone deacetylase activity	F
GO:0004428	35	0.00332	0.212	0.00143	0.0965	0.0483	1	0.00264	0.161	0.0135	0.692	0.015	0.668	0.0153	0.488	0.00878	0.428	inositol or phosphatidylinositol kinase activity	F
GO:0004434	16	0.415	1	0.224	1	0.64	1	0.564	1	0.282	1	0.299	1	0.622	1	0.125	1	inositol or phosphatidylinositol phosphodiesterase activity	F
GO:0004435	16	0.415	1	0.224	1	0.64	1	0.564	1	0.282	1	0.299	1	0.622	1	0.125	1	phosphoinositide phospholipase C activity	F
GO:0004437	34	0.121	1	0.0507	1	0.145	1	0.0437	1	0.108	1	0.109	1	0.59	1	0.121	1	inositol or phosphatidylinositol phosphatase activity	F
GO:0004467	13	0.137	1	0.0246	1	0.214	1	0.049	1	0.39	1	0.24	1	0.0198	0.636	0.064	1	long-chain-fatty-acid-CoA ligase activity	F
GO:0004468	21	0.0214	1	0.000405	0.0474	0.0733	1	0.000628	0.042	0.0893	1	0.00777	0.421	0.418	1	0.00448	0.201	lysine N-acetyltransferase activity	F
GO:0004497	177	1	1	1	1	1	1	1	1	0.996	1	1	1	0.994	1	0.966	1	monooxygenase activity	F
GO:0004499	23	0.93	1	1	1	0.995	1	0.907	1	0.623	1	1	1	0.843	1	0.988	1	dimethylaniline monooxygenase (N-oxide-forming) activity	F
GO:0004518	162	0.00206	0.212	0.000346	0.044	0.00685	0.469	0.0129	0.647	0.00374	0.213	0.00927	0.503	0.289	1	0.000692	0.06	nuclease activity	F
GO:0004519	104	0.00952	0.608	0.0246	1	0.0203	1	0.154	1	0.0153	0.692	0.0654	1	0.249	1	0.0202	0.736	endonuclease activity	F
GO:0004520	15	0.315	1	0.129	1	0.328	1	0.0751	1	0.878	1	0.719	1	0.123	1	0.105	1	endodeoxyribonuclease activity	F
GO:0004521	47	0.261	1	0.453	1	0.782	1	0.955	1	0.132	1	0.238	1	0.267	1	0.165	1	endoribonuclease activity	F
GO:0004522	21	1	1	1	1	1	1	1	1	0.932	1	0.736	1	0.975	1	0.992	1	pancreatic ribonuclease activity	F
GO:0004526	11	0.133	1	0.0652	1	0.497	1	0.277	1	0.15	1	0.242	1	0.175	1	0.0221	0.999	ribonuclease P activity	F
GO:0004527	55	0.155	1	0.00299	0.188	0.181	1	0.0272	1	0.243	1	0.0166	0.668	0.597	1	0.0041	0.201	exonuclease activity	F
GO:0004532	13	0.11	1	0.0864	1	0.0542	1	0.249	1	0.25	1	0.0271	1	0.51	1	0.193	1	exoribonuclease activity	F
GO:0004536	26	0.381	1	0.0397	1	0.385	1	0.013	0.647	0.45	1	0.543	1	0.646	1	0.118	1	deoxyribonuclease activity	F
GO:0004540	66	0.156	1	0.0849	1	0.419	1	0.738	1	0.148	1	0.0188	0.668	0.304	1	0.0439	1	ribonuclease activity	F
GO:0004549	14	0.0543	1	0.0583	1	0.248	1	0.494	1	0.0924	1	0.143	1	0.132	1	0.0414	1	tRNA-specific ribonuclease activity	F
GO:0004550	12	0.0611	1	0.00224	0.171	0.103	1	0.0315	1	0.0182	0.79	0.00347	0.151	0.56	1	0.0852	1	nucleoside diphosphate kinase activity	F
GO:0004553	113	0.0687	1	0.186	1	0.0321	1	0.54	1	0.0343	1	0.0371	1	0.495	1	0.374	1	hydrolase activity, hydrolyzing O-glycosyl compounds	F
GO:0004568	10	0.917	1	0.967	1	0.978	1	0.876	1	0.579	1	0.975	1	0.985	1	0.938	1	chitinase activity	F
GO:0004601	50	0.0352	1	0.116	1	0.0708	1	0.102	1	0.192	1	0.213	1	0.0159	0.488	0.248	1	peroxidase activity	F
GO:0004602	10	0.12	1	0.255	1	0.254	1	0.185	1	0.165	1	0.404	1	0.0786	1	0.332	1	glutathione peroxidase activity	F
GO:0004620	59	0.0532	1	0.015	0.763	0.221	1	0.486	1	0.0474	1	0.132	1	0.125	1	0.0078	0.428	phospholipase activity	F
GO:0004623	29	0.0899	1	0.174	1	0.383	1	0.735	1	0.0914	1	0.162	1	0.1	1	0.141	1	phospholipase A2 activity	F
GO:0004629	20	0.435	1	0.373	1	0.646	1	0.582	1	0.286	1	0.513	1	0.614	1	0.243	1	phospholipase C activity	F
GO:0004653	15	0.975	1	0.614	1	0.994	1	0.986	1	1	1	0.857	1	0.441	1	0.0412	1	polypeptide N-acetylgalactosaminyltransferase activity	F
GO:0004659	20	0.0684	1	0.232	1	0.0968	1	0.463	1	0.128	1	0.202	1	0.296	1	0.232	1	prenyltransferase activity	F
GO:0004672	688	0.000137	0.0143	1.59e-12	0	3.52e-05	0.00982	4.51e-09	0.000893	0.00187	0.12	1.25e-07	0.00165	0.123	1	1.65e-08	0	protein kinase activity	F
GO:0004673	30	0.65	1	0.525	1	0.819	1	0.537	1	0.453	1	0.659	1	0.676	1	0.193	1	protein histidine kinase activity	F
GO:0004674	562	2.22e-07	0.00257	6.51e-18	0	1.8e-08	0.00098	1.56e-13	0	3.43e-05	0.00633	1.01e-10	0.00062	0.0749	1	2.82e-10	0	protein serine/threonine kinase activity	F
GO:0004675	13	0.138	1	0.175	1	0.0811	1	0.253	1	0.242	1	0.102	1	0.738	1	0.358	1	transmembrane receptor protein serine/threonine kinase activity	F
GO:0004683	22	0.16	1	0.0141	0.607	0.152	1	0.0777	1	0.289	1	0.0465	1	0.134	1	0.0279	0.999	calmodulin regulated protein kinase activity	F
GO:0004689	15	0.534	1	0.0377	1	0.592	1	0.213	1	0.599	1	0.022	1	0.489	1	0.069	1	phosphorylase kinase activity	F
GO:0004693	31	0.00441	0.214	0.000118	0.015	0.000376	0.04	5.01e-06	0.00289	0.0634	1	0.0251	1	0.361	1	0.019	0.736	cyclin-dependent protein kinase activity	F
GO:0004697	15	0.466	1	0.228	1	0.242	1	0.239	1	0.681	1	0.171	1	0.41	1	0.631	1	protein kinase C activity	F
GO:0004702	55	0.00263	0.212	0.00131	0.0965	0.00144	0.079	0.0121	0.647	0.00722	0.692	0.00389	0.184	0.324	1	0.0952	1	receptor signaling protein serine/threonine kinase activity	F
GO:0004707	18	0.0165	1	0.000123	0.015	0.0121	0.653	2.86e-05	0.00957	0.0106	0.692	0.0258	1	0.573	1	0.104	1	MAP kinase activity	F
GO:0004709	17	0.123	1	0.437	1	0.284	1	0.992	1	0.124	1	0.204	1	0.21	1	0.274	1	MAP kinase kinase kinase activity	F
GO:0004712	10	0.387	1	0.323	1	0.527	1	0.516	1	0.493	1	0.224	1	0.172	1	0.437	1	protein threonine/tyrosine kinase activity	F
GO:0004713	570	0.000323	0.031	1.05e-12	0	4.09e-05	0.00982	2.72e-08	0.000893	0.00488	0.375	5.61e-08	0.00165	0.163	1	5.31e-10	0	protein-tyrosine kinase activity	F
GO:0004714	111	0.973	1	0.841	1	0.972	1	0.993	1	0.889	1	0.866	1	0.762	1	0.0806	1	transmembrane receptor protein tyrosine kinase activity	F
GO:0004715	38	0.35	1	0.00111	0.0965	0.434	1	0.0209	0.937	0.223	1	0.00758	0.421	0.628	1	0.000615	0.03	non-membrane spanning protein tyrosine kinase activity	F
GO:0004721	161	0.000471	0.044	3.49e-05	0.007	0.000817	0.049	0.000198	0.013	0.043	1	0.0101	0.503	0.000626	0.0344	0.000867	0.06	phosphoprotein phosphatase activity	F
GO:0004722	37	0.00877	0.608	6.24e-05	0.007	0.00126	0.079	0.000157	0.013	0.11	1	0.00443	0.266	0.179	1	0.0117	0.476	protein serine/threonine phosphatase activity	F
GO:0004725	112	0.0368	1	0.00964	0.469	0.065	1	0.0433	1	0.305	1	0.0593	1	0.00506	0.223	0.0282	0.999	protein tyrosine phosphatase activity	F
GO:0004745	10	0.617	1	0.26	1	0.931	1	0.202	1	0.211	1	0.259	1	0.723	1	0.656	1	retinol dehydrogenase activity	F
GO:0004765	12	0.048	1	0.0315	1	0.0699	1	0.136	1	0.039	1	0.0792	1	0.129	1	0.0928	1	shikimate kinase activity	F
GO:0004806	15	0.606	1	0.693	1	0.762	1	0.667	1	0.339	1	0.576	1	0.573	1	0.489	1	triacylglycerol lipase activity	F
GO:0004812	70	1.01e-05	0.007	7.63e-05	0.015	0.000164	0.0116	6.87e-05	0.013	0.000108	0.027	0.000203	0.0233	0.0253	0.838	0.12	1	aminoacyl-tRNA ligase activity	F
GO:0004835	16	0.524	1	0.117	1	0.914	1	0.0573	1	0.674	1	0.792	1	0.107	1	0.0594	1	tubulin-tyrosine ligase activity	F
GO:0004842	151	6.91e-09	0.00257	2.6e-12	0	4.15e-09	0.00098	2.59e-10	0	1.42e-05	0.005	3.81e-09	0.000878	0.00416	0.223	9.61e-05	0.016	ubiquitin-protein ligase activity	F
GO:0004843	69	0.0201	1	4.28e-05	0.007	0.00104	0.079	3.6e-06	0.00289	0.0977	1	0.0102	0.503	0.716	1	0.00304	0.127	ubiquitin-specific protease activity	F
GO:0004857	306	0.942	1	0.779	1	0.96	1	0.784	1	0.992	1	0.673	1	0.246	1	0.723	1	enzyme inhibitor activity	F
GO:0004859	11	0.195	1	0.297	1	0.335	1	0.855	1	0.539	1	0.214	1	0.0939	1	0.148	1	phospholipase inhibitor activity	F
GO:0004860	23	0.31	1	0.00811	0.416	0.14	1	0.00721	0.492	0.857	1	0.017	0.668	0.407	1	0.139	1	protein kinase inhibitor activity	F
GO:0004864	19	0.213	1	0.12	1	0.369	1	0.108	1	0.191	1	0.331	1	0.249	1	0.0442	1	protein phosphatase inhibitor activity	F
GO:0004866	205	1	1	1	1	1	1	1	1	1	1	0.999	1	0.889	1	0.999	1	endopeptidase inhibitor activity	F
GO:0004867	143	1	1	1	1	1	1	0.999	1	0.999	1	0.997	1	0.856	1	0.994	1	serine-type endopeptidase inhibitor activity	F
GO:0004869	42	0.941	1	0.997	1	0.394	1	0.975	1	0.994	1	0.978	1	0.921	1	0.957	1	cysteine protease inhibitor activity	F
GO:0004871	3625	1	1	1	1	1	1	1	1	1	1	1	1	1	1	1	1	signal transducer activity	F
GO:0004872	3284	1	1	1	1	1	1	1	1	1	1	1	1	1	1	1	1	receptor activity	F
GO:0004879	177	0.0036	0.212	8.13e-05	0.015	0.0177	1	0.000336	0.042	0.00289	0.213	0.000157	0.0233	0.34	1	0.0334	1	ligand-dependent nuclear receptor activity	F
GO:0004887	19	0.111	1	0.307	1	0.164	1	0.713	1	0.199	1	0.243	1	0.185	1	0.147	1	thyroid hormone receptor activity	F
GO:0004888	2484	1	1	1	1	1	1	1	1	1	1	1	1	1	1	1	1	transmembrane receptor activity	F
GO:0004889	17	0.144	1	0.36	1	0.657	1	0.414	1	0.302	1	0.578	1	0.0129	0.478	0.195	1	nicotinic acetylcholine-activated cation-selective channel activity	F
GO:0004890	33	1	1	1	1	1	1	1	1	1	1	0.999	1	1	1	0.982	1	GABA-A receptor activity	F
GO:0004896	81	0.995	1	1	1	1	1	1	1	0.995	1	1	1	0.494	1	0.414	1	hematopoietin/interferon-class (D200-domain) cytokine receptor activity	F
GO:0004907	50	0.996	1	1	1	1	1	1	1	0.997	1	0.992	1	0.593	1	0.544	1	interleukin receptor activity	F
GO:0004908	27	1	1	1	1	1	1	1	1	0.999	1	1	1	1	1	0.998	1	interleukin-1 receptor activity	F
GO:0004918	10	0.0547	1	0.0504	1	0.792	1	0.803	1	0.444	1	0.0922	1	0.014	0.478	0.00993	0.476	interleukin-8 receptor activity	F
GO:0004926	12	0.0546	1	0.136	1	0.218	1	0.122	1	0.0138	0.692	0.352	1	0.621	1	0.0852	1	non-G-protein coupled 7TM receptor activity	F
GO:0004930	2114	1	1	1	1	1	1	1	1	1	1	1	1	1	1	1	1	G-protein coupled receptor activity	F
GO:0004932	15	0.925	1	0.963	1	0.833	1	0.986	1	0.973	1	0.883	1	0.82	1	0.695	1	mating-type factor pheromone receptor activity	F
GO:0004935	41	0.997	1	0.952	1	1	1	0.969	1	0.972	1	0.984	1	0.602	1	0.426	1	adrenoceptor activity	F
GO:0004936	15	0.618	1	0.534	1	0.913	1	0.526	1	0.529	1	0.816	1	0.22	1	0.251	1	alpha-adrenergic receptor activity	F
GO:0004942	25	0.591	1	0.0378	1	1	1	0.219	1	0.683	1	0.074	1	0.0178	0.517	0.0156	0.656	anaphylatoxin receptor activity	F
GO:0004943	12	0.707	1	0.0779	1	1	1	0.416	1	0.652	1	0.0742	1	0.0465	1	0.0789	1	C3a anaphylatoxin receptor activity	F
GO:0004945	62	0.503	1	0.397	1	0.989	1	0.93	1	0.29	1	0.089	1	0.14	1	0.462	1	angiotensin type II receptor activity	F
GO:0004946	18	0.907	1	0.935	1	0.997	1	0.942	1	0.931	1	0.882	1	0.263	1	0.819	1	bombesin receptor activity	F
GO:0004947	39	0.689	1	0.518	1	0.985	1	0.698	1	0.422	1	0.316	1	0.296	1	0.425	1	bradykinin receptor activity	F
GO:0004949	102	1	1	1	1	1	1	1	1	1	1	1	1	1	1	1	1	cannabinoid receptor activity	F
GO:0004950	48	0.777	1	0.862	1	0.999	1	0.999	1	0.686	1	0.559	1	0.144	1	0.322	1	chemokine receptor activity	F
GO:0004952	61	0.286	1	0.103	1	0.18	1	0.0911	1	0.646	1	0.302	1	0.162	1	0.0665	1	dopamine receptor activity	F
GO:0004953	15	0.415	1	0.491	1	0.836	1	0.611	1	0.556	1	0.716	1	0.0607	1	0.385	1	icosanoid receptor activity	F
GO:0004954	15	0.415	1	0.491	1	0.836	1	0.611	1	0.556	1	0.716	1	0.0607	1	0.385	1	prostanoid receptor activity	F
GO:0004955	15	0.415	1	0.491	1	0.836	1	0.611	1	0.556	1	0.716	1	0.0607	1	0.385	1	prostaglandin receptor activity	F
GO:0004957	11	0.775	1	0.799	1	0.898	1	0.741	1	0.742	1	0.825	1	0.521	1	0.955	1	prostaglandin E receptor activity	F
GO:0004965	45	1	1	1	1	1	1	0.996	1	1	1	0.98	1	1	1	1	1	GABA-B receptor activity	F
GO:0004966	47	0.271	1	0.365	1	0.499	1	0.64	1	0.327	1	0.385	1	0.2	1	0.256	1	galanin receptor activity	F
GO:0004969	48	9.02e-06	0.007	0.000444	0.0474	0.000823	0.049	0.000987	0.094	6.6e-05	0.024	0.00239	0.127	0.0129	0.478	0.0142	0.476	histamine receptor activity	F
GO:0004970	18	0.978	1	0.991	1	0.98	1	0.922	1	0.917	1	0.999	1	0.863	1	0.697	1	ionotropic glutamate receptor activity	F
GO:0004974	20	0.398	1	0.42	1	0.654	1	0.105	1	0.256	1	0.572	1	0.757	1	0.957	1	leukotriene receptor activity	F
GO:0004977	483	1	1	1	1	1	1	1	1	1	1	1	1	1	1	1	1	melanocortin receptor activity	F
GO:0004981	18	0.983	1	1	1	0.958	1	1	1	0.988	1	1	1	0.883	1	0.941	1	muscarinic acetylcholine receptor activity	F
GO:0004982	40	0.875	1	0.636	1	0.981	1	0.879	1	0.605	1	0.233	1	0.515	1	0.65	1	N-formyl peptide receptor activity	F
GO:0004983	95	0.972	1	0.998	1	1	1	1	1	0.91	1	0.984	1	0.149	1	0.601	1	neuropeptide Y receptor activity	F
GO:0004984	1122	1	1	1	1	1	1	1	1	1	1	1	1	1	1	1	1	olfactory receptor activity	F
GO:0004985	17	0.536	1	0.849	1	0.937	1	0.58	1	0.185	1	0.708	1	0.606	1	1	1	opioid receptor activity	F
GO:0004989	11	1	1	1	1	1	1	1	1	0.999	1	1	1	1	1	1	1	octopamine receptor activity	F
GO:0004992	24	0.929	1	0.87	1	0.99	1	0.981	1	0.807	1	0.51	1	0.721	1	0.868	1	platelet activating factor receptor activity	F
GO:0004994	19	0.514	1	0.837	1	0.799	1	0.792	1	0.229	1	0.568	1	0.825	1	0.995	1	somatostatin receptor activity	F
GO:0005000	17	0.94	1	0.761	1	0.817	1	0.62	1	0.868	1	0.815	1	1	1	0.848	1	vasopressin receptor activity	F
GO:0005003	14	0.572	1	0.719	1	0.826	1	0.976	1	0.33	1	0.701	1	0.6	1	0.295	1	ephrin receptor activity	F
GO:0005021	65	0.999	1	0.998	1	0.989	1	1	1	0.995	1	0.998	1	0.907	1	0.498	1	vascular endothelial growth factor receptor activity	F
GO:0005024	13	0.138	1	0.175	1	0.0811	1	0.253	1	0.242	1	0.102	1	0.738	1	0.358	1	transforming growth factor beta receptor activity	F
GO:0005044	35	0.788	1	0.468	1	0.911	1	0.756	1	0.968	1	0.857	1	0.185	1	0.0601	1	scavenger receptor activity	F
GO:0005048	10	0.076	1	0.0129	0.607	0.0509	1	0.107	1	0.821	1	0.0637	1	0.195	1	0.00144	0.06	signal sequence binding	F
GO:0005057	108	0.000995	0.0886	0.000593	0.059	0.00196	0.095	0.0171	0.647	0.0119	0.692	0.00429	0.266	0.0197	0.636	0.00984	0.476	receptor signaling protein activity	F
GO:0005070	17	0.12	1	0.0392	1	0.23	1	0.0402	1	0.179	1	0.194	1	0.27	1	0.0227	0.999	SH3/SH2 adaptor activity	F
GO:0005083	216	0.00431	0.214	2.18e-09	0.00089	0.0236	1	1.46e-05	0.00289	0.266	1	9.32e-08	0.00165	0.00476	0.223	8.44e-05	0.016	small GTPase regulator activity	F
GO:0005085	157	0.221	1	0.00588	0.308	0.561	1	0.0191	0.937	0.502	1	0.0227	1	0.0619	1	0.0193	0.736	guanyl-nucleotide exchange factor activity	F
GO:0005086	17	0.895	1	0.424	1	0.89	1	0.56	1	0.976	1	0.331	1	0.598	1	0.376	1	ARF guanyl-nucleotide exchange factor activity	F
GO:0005088	84	0.212	1	0.000642	0.059	0.441	1	0.0374	1	0.836	1	0.00536	0.343	0.0358	0.838	0.000265	0.03	Ras guanyl-nucleotide exchange factor activity	F
GO:0005089	74	0.535	1	0.00199	0.13	0.629	1	0.0714	1	0.972	1	0.0169	0.668	0.155	1	0.00105	0.06	Rho guanyl-nucleotide exchange factor activity	F
GO:0005096	200	0.121	1	4.76e-05	0.007	0.111	1	0.00358	0.257	0.612	1	2.51e-05	0.00587	0.115	1	0.027	0.999	GTPase activator activity	F
GO:0005097	44	0.016	1	0.00167	0.0965	0.0409	1	0.0092	0.572	0.129	1	0.00148	0.093	0.118	1	0.186	1	Rab GTPase activator activity	F
GO:0005099	67	0.0137	0.608	0.000286	0.044	0.0531	1	0.00182	0.124	0.136	1	0.000402	0.0233	0.0866	1	0.203	1	Ras GTPase activator activity	F
GO:0005100	17	0.351	1	0.0996	1	0.439	1	0.22	1	0.64	1	0.0685	1	0.157	1	0.351	1	Rho GTPase activator activity	F
GO:0005102	810	0.505	1	0.202	1	0.823	1	0.56	1	0.642	1	0.388	1	0.0876	1	0.0285	0.999	receptor binding	F
GO:0005118	11	0.41	1	0.693	1	0.296	1	0.65	1	0.771	1	0.537	1	0.39	1	0.842	1	sevenless binding	F
GO:0005125	259	0.996	1	0.844	1	0.971	1	0.878	1	0.995	1	0.951	1	0.885	1	0.243	1	cytokine activity	F
GO:0005126	61	1	1	1	1	1	1	0.999	1	1	1	1	1	1	1	0.854	1	hematopoietin/interferon-class (D200-domain) cytokine receptor binding	F
GO:0005149	13	0.955	1	0.933	1	0.947	1	0.968	1	0.986	1	0.988	1	0.529	1	0.763	1	interleukin-1 receptor binding	F
GO:0005158	18	0.561	1	0.72	1	0.96	1	0.799	1	0.611	1	0.641	1	0.122	1	0.723	1	insulin receptor binding	F
GO:0005160	11	0.186	1	0.602	1	0.27	1	0.524	1	0.356	1	0.653	1	0.152	1	0.494	1	transforming growth factor beta receptor binding	F
GO:0005164	33	0.257	1	0.0782	1	0.317	1	0.214	1	0.413	1	0.0672	1	0.154	1	0.164	1	tumor necrosis factor receptor binding	F
GO:0005178	29	0.696	1	0.106	1	0.767	1	0.574	1	0.688	1	0.204	1	0.353	1	0.0365	1	integrin binding	F
GO:0005179	170	0.498	1	0.724	1	0.89	1	0.924	1	0.494	1	0.507	1	0.109	1	0.529	1	hormone activity	F
GO:0005184	18	0.164	1	0.0604	1	0.2	1	0.308	1	0.37	1	0.0286	1	0.0745	1	0.0816	1	neuropeptide hormone activity	F
GO:0005198	1009	2.06e-07	0.00257	0.00064	0.059	1.54e-05	0.003	0.00594	0.288	2.86e-06	0.00169	0.00266	0.144	0.000863	0.0344	0.00277	0.127	structural molecule activity	F
GO:0005199	60	0.0188	1	0.00662	0.312	0.0655	1	0.0023	0.139	0.0175	0.79	0.0225	1	0.259	1	0.119	1	structural constituent of cell wall	F
GO:0005200	51	0.146	1	0.0651	1	0.19	1	0.241	1	0.151	1	0.213	1	0.322	1	0.0178	0.656	structural constituent of cytoskeleton	F
GO:0005201	52	0.501	1	0.342	1	0.646	1	0.224	1	0.695	1	0.54	1	0.223	1	0.341	1	extracellular matrix structural constituent	F
GO:0005212	20	0.293	1	0.404	1	0.557	1	0.605	1	0.405	1	0.212	1	0.183	1	0.44	1	structural constituent of eye lens	F
GO:0005215	1570	9.32e-05	0.0143	2.33e-11	0	0.00703	0.469	1.65e-06	0.00289	0.0112	0.692	2.47e-06	0.0029	0.00017	0.008	9.07e-11	0	transporter activity	F
GO:0005216	443	0.632	1	0.281	1	0.958	1	0.791	1	0.933	1	0.549	1	0.016	0.488	0.00449	0.201	ion channel activity	F
GO:0005217	12	0.864	1	0.514	1	0.954	1	0.622	1	0.953	1	0.573	1	0.0947	1	0.278	1	intracellular ligand-gated ion channel activity	F
GO:0005230	75	0.948	1	0.985	1	0.969	1	0.971	1	0.886	1	0.975	1	0.777	1	0.733	1	extracellular ligand-gated ion channel activity	F
GO:0005231	49	0.435	1	0.626	1	0.724	1	0.576	1	0.684	1	0.677	1	0.128	1	0.47	1	excitatory extracellular ligand-gated ion channel activity	F
GO:0005234	19	0.985	1	0.995	1	0.969	1	0.909	1	0.94	1	1	1	0.91	1	0.757	1	glutamate-gated ion channel activity	F
GO:0005242	19	0.995	1	0.995	1	0.998	1	0.999	1	1	1	0.956	1	0.389	1	0.888	1	inward rectifier potassium channel activity	F
GO:0005244	269	0.446	1	0.131	1	0.763	1	0.605	1	0.813	1	0.321	1	0.0397	1	0.00791	0.428	voltage-gated ion channel activity	F
GO:0005245	40	0.449	1	0.108	1	0.771	1	0.328	1	0.511	1	0.413	1	0.173	1	0.0175	0.656	voltage-gated calcium channel activity	F
GO:0005246	13	0.405	1	0.204	1	0.499	1	0.235	1	0.852	1	0.114	1	0.0381	0.838	0.356	1	calcium channel regulator activity	F
GO:0005247	19	0.288	1	0.138	1	0.641	1	0.183	1	0.34	1	0.732	1	0.223	1	0.138	1	voltage-gated chloride channel activity	F
GO:0005248	13	0.876	1	0.965	1	1	1	0.999	1	0.775	1	1	1	0.111	1	0.072	1	voltage-gated sodium channel activity	F
GO:0005249	204	0.539	1	0.355	1	0.746	1	0.766	1	0.869	1	0.318	1	0.0893	1	0.0789	1	voltage-gated potassium channel activity	F
GO:0005253	67	0.952	1	0.726	1	0.99	1	0.81	1	0.891	1	0.906	1	0.773	1	0.295	1	anion channel activity	F
GO:0005254	62	0.974	1	0.961	1	0.995	1	0.974	1	0.927	1	0.998	1	0.806	1	0.472	1	chloride channel activity	F
GO:0005261	339	0.296	1	0.0641	1	0.782	1	0.47	1	0.79	1	0.149	1	0.0026	0.084	0.0025	0.079	cation channel activity	F
GO:0005262	89	0.429	1	0.00793	0.416	0.676	1	0.117	1	0.659	1	0.152	1	0.0703	1	0.000948	0.06	calcium channel activity	F
GO:0005267	226	0.716	1	0.522	1	0.878	1	0.871	1	0.956	1	0.385	1	0.0934	1	0.107	1	potassium channel activity	F
GO:0005272	28	0.647	1	0.947	1	1	1	0.764	1	0.558	1	0.997	1	0.0738	1	0.599	1	sodium channel activity	F
GO:0005275	74	0.56	1	0.161	1	0.405	1	0.455	1	0.547	1	0.175	1	0.685	1	0.161	1	amine transporter activity	F
GO:0005279	20	0.701	1	0.668	1	0.875	1	0.693	1	0.635	1	0.398	1	0.457	1	0.817	1	amino acid-polyamine transporter activity	F
GO:0005283	15	0.79	1	0.62	1	0.7	1	0.544	1	0.91	1	0.314	1	0.663	1	0.975	1	sodium:amino acid symporter activity	F
GO:0005310	71	0.811	1	0.667	1	0.937	1	0.913	1	0.772	1	0.544	1	0.542	1	0.39	1	dicarboxylic acid transporter activity	F
GO:0005313	10	0.476	1	0.215	1	0.392	1	0.17	1	0.482	1	0.494	1	0.529	1	0.347	1	L-glutamate transporter activity	F
GO:0005319	61	0.0241	1	0.106	1	0.0237	1	0.0715	1	0.0276	1	0.626	1	0.28	1	0.0631	1	lipid transporter activity	F
GO:0005326	32	0.903	1	0.53	1	0.895	1	0.948	1	0.967	1	0.365	1	0.522	1	0.142	1	neurotransmitter transporter activity	F
GO:0005328	30	0.949	1	0.553	1	0.968	1	0.915	1	0.964	1	0.406	1	0.579	1	0.172	1	neurotransmitter:sodium symporter activity	F
GO:0005337	14	0.34	1	0.525	1	0.689	1	0.581	1	0.292	1	0.505	1	0.277	1	0.279	1	nucleoside transporter activity	F
GO:0005342	140	0.668	1	0.231	1	0.571	1	0.509	1	0.592	1	0.216	1	0.804	1	0.262	1	organic acid transporter activity	F
GO:0005343	89	0.858	1	0.444	1	0.878	1	0.582	1	0.832	1	0.353	1	0.821	1	0.47	1	organic acid:sodium symporter activity	F
GO:0005344	12	0.736	1	0.165	1	0.302	1	0.065	1	1	1	0.18	1	0.483	1	0.559	1	oxygen transporter activity	F
GO:0005351	44	0.132	1	0.034	1	0.375	1	0.18	1	0.102	1	0.0457	1	0.189	1	0.0692	1	sugar porter activity	F
GO:0005355	12	0.12	1	0.028	1	0.361	1	0.314	1	0.163	1	0.0104	0.503	0.0314	0.838	0.0605	1	glucose transporter activity	F
GO:0005372	11	0.491	1	0.157	1	0.294	1	0.0281	1	0.479	1	0.393	1	0.832	1	0.517	1	water transporter activity	F
GO:0005385	12	0.00507	0.272	0.000757	0.081	0.00337	0.203	0.00283	0.161	0.102	1	0.0743	1	0.302	1	0.0127	0.476	zinc ion transporter activity	F
GO:0005386	438	0.172	1	0.00733	0.312	0.247	1	0.0483	1	0.0877	1	0.0267	1	0.719	1	0.0287	0.999	carrier activity	F
GO:0005416	18	0.697	1	0.628	1	0.856	1	0.669	1	0.796	1	0.405	1	0.34	1	0.747	1	cation:amino acid symporter activity	F
GO:0005451	19	0.193	1	0.271	1	0.177	1	0.323	1	0.092	1	0.493	1	0.457	1	0.106	1	monovalent cation:proton antiporter activity	F
GO:0005452	16	0.332	1	0.0541	1	0.71	1	0.0228	0.937	0.197	1	0.589	1	0.302	1	0.0203	0.736	inorganic anion exchanger activity	F
GO:0005478	29	0.0271	1	0.000714	0.059	0.0628	1	0.0114	0.647	0.0122	0.692	0.00492	0.266	0.35	1	0.0104	0.476	intracellular transporter activity	F
GO:0005484	22	0.112	1	0.0242	1	0.107	1	0.112	1	0.0617	1	0.018	0.668	0.67	1	0.0533	1	SNAP receptor activity	F
GO:0005488	13193	0	0	0	0	0	0	0	0	0	0	0	0	1.29e-17	0	0	0	binding	F
GO:0005496	67	0.146	1	0.248	1	0.476	1	0.397	1	0.169	1	0.2	1	0.106	1	0.234	1	steroid binding	F
GO:0005501	17	0.888	1	0.385	1	0.97	1	0.388	1	0.972	1	0.626	1	0.433	1	0.153	1	retinoid binding	F
GO:0005504	20	0.148	1	0.106	1	0.35	1	0.6	1	0.171	1	0.654	1	0.212	1	0.009	0.428	fatty acid binding	F
GO:0005506	375	0.931	1	0.641	1	0.951	1	0.748	1	0.992	1	0.514	1	0.502	1	0.417	1	iron ion binding	F
GO:0005507	79	0.754	1	0.786	1	0.937	1	0.848	1	0.774	1	0.669	1	0.328	1	0.892	1	copper ion binding	F
GO:0005509	1021	0.887	1	0.161	1	0.999	1	0.881	1	0.869	1	0.786	1	0.105	1	1.59e-05	0.007	calcium ion binding	F
GO:0005515	7049	0	0	0	0	0	0	0	0	0	0	0	0	2.06e-43	0	0	0	protein binding	F
GO:0005516	120	0.135	1	0.00132	0.0965	0.517	1	0.0255	1	0.292	1	0.00398	0.184	0.0321	0.838	0.00288	0.127	calmodulin binding	F
GO:0005520	24	0.914	1	0.751	1	0.901	1	0.948	1	0.679	1	0.794	1	0.862	1	0.195	1	insulin-like growth factor binding	F
GO:0005524	1555	1.06e-27	0	5.98e-43	0	1.35e-26	0	7.65e-31	0	2.56e-15	0	1.97e-27	0	1.39e-08	0	2.77e-20	0	ATP binding	F
GO:0005525	379	4.84e-07	0.00257	3.2e-09	0.00089	2.81e-05	0.003	5.72e-07	0.00289	2.13e-06	0.00169	3.17e-07	0.00165	0.00298	0.087	0.000315	0.03	GTP binding	F
GO:0005529	240	1	1	0.995	1	1	1	1	1	1	1	0.997	1	0.987	1	0.469	1	sugar binding	F
GO:0005537	15	0.604	1	0.367	1	0.713	1	0.273	1	0.535	1	0.878	1	0.452	1	0.224	1	mannose binding	F
GO:0005539	83	0.681	1	0.688	1	0.638	1	0.758	1	0.595	1	0.816	1	0.754	1	0.393	1	glycosaminoglycan binding	F
GO:0005540	17	0.282	1	0.602	1	0.403	1	0.184	1	0.174	1	0.828	1	0.501	1	0.876	1	hyaluronic acid binding	F
GO:0005542	11	0.149	1	0.213	1	0.215	1	0.172	1	0.245	1	0.337	1	0.0886	1	0.627	1	folic acid binding	F
GO:0005543	128	7.08e-05	0.0141	1.26e-09	0.00089	0.011	0.653	2.09e-07	0.00289	0.000817	0.12	4.15e-06	0.0029	0.00176	0.084	3.47e-05	0.007	phospholipid binding	F
GO:0005544	23	0.326	1	0.0707	1	0.429	1	0.57	1	0.7	1	0.0119	0.503	0.16	1	0.216	1	calcium-dependent phospholipid binding	F
GO:0005545	10	0.371	1	0.0891	1	0.463	1	0.128	1	0.183	1	0.0838	1	0.943	1	0.164	1	phosphatidylinositol binding	F
GO:0005548	19	0.955	1	0.362	1	0.787	1	0.398	1	0.995	1	0.28	1	0.712	1	0.624	1	phospholipid transporter activity	F
GO:0005549	41	1	1	1	1	1	1	1	1	1	1	0.963	1	1	1	1	1	odorant binding	F
GO:0005550	38	1	1	1	1	1	1	1	1	1	1	0.897	1	1	1	0.998	1	pheromone binding	F
GO:0005575	16829	0	0	0	0	0	0	0	0	0	0	0	0	9.91e-10	0	9.53e-44	0	cellular_component	C
GO:0005576	2619	0.727	1	0.952	1	0.987	1	1	1	0.849	1	0.995	1	0.00705	0.275	0.00318	0.127	extracellular region	C
GO:0005578	319	0.782	1	0.613	1	0.981	1	0.966	1	0.729	1	0.507	1	0.174	1	0.0722	1	extracellular matrix (sensu Metazoa)	C
GO:0005581	21	0.917	1	0.776	1	1	1	0.956	1	0.925	1	0.87	1	0.353	1	0.189	1	collagen	C
GO:0005604	72	0.929	1	0.75	1	0.992	1	0.818	1	0.856	1	0.738	1	0.351	1	0.268	1	basement membrane	C
GO:0005605	26	0.915	1	0.952	1	0.959	1	0.809	1	0.836	1	0.848	1	0.428	1	0.995	1	basal lamina	C
GO:0005615	1830	0.257	1	0.402	1	0.885	1	0.92	1	0.571	1	0.773	1	0.000522	0.0344	0.00115	0.06	extracellular space	C
GO:0005622	10505	0	0	0	0	0	0	0	0	0	0	0	0	0	0	0	0	intracellular	C
GO:0005623	15412	0	0	0	0	0	0	0	0	4.2e-45	0	0	0	1.04e-09	0	8.07e-43	0	cell	C
GO:0005624	512	0.101	1	0.000533	0.0474	0.12	1	0.00784	0.492	0.17	1	0.00434	0.266	0.304	1	0.00102	0.06	membrane fraction	C
GO:0005625	100	0.00202	0.212	0.000447	0.0474	0.00301	0.135	0.000124	0.013	0.00669	0.692	0.0153	0.668	0.0431	1	0.0269	0.999	soluble fraction	C
GO:0005626	21	0.0124	0.608	0.00399	0.188	0.058	1	0.0388	1	0.013	0.692	0.014	0.668	0.0193	0.636	0.0166	0.656	insoluble fraction	C
GO:0005634	4585	0	0	0	0	0	0	0	0	0	0	0	0	2.76e-17	0	8.27e-30	0	nucleus	C
GO:0005635	169	3.1e-09	0.00257	1.24e-14	0	9.01e-07	0.002	1.48e-11	0	1.72e-06	0.00169	6.51e-09	0.000878	0.00126	0.0614	4.05e-05	0.007	nuclear envelope	C
GO:0005637	17	0.0214	1	0.00721	0.312	0.0106	0.653	0.0025	0.139	0.175	1	0.0431	1	0.104	1	0.102	1	nuclear inner membrane	C
GO:0005640	11	0.211	1	0.0422	1	0.255	1	0.141	1	0.281	1	0.081	1	0.232	1	0.183	1	nuclear outer membrane	C
GO:0005643	57	9e-09	0.00257	9.67e-13	0	1.17e-07	0.002	2.56e-11	0	6e-06	0.00169	1.01e-05	0.00587	0.0492	1	8.54e-05	0.016	nuclear pore	C
GO:0005654	531	1.23e-24	0	2.54e-27	0	1.29e-21	0	5.54e-25	0	9.39e-15	0	1.35e-15	0	7.59e-09	0	1.56e-09	0	nucleoplasm	C
GO:0005657	29	6.66e-06	0.00362	2.01e-07	0.00392	5.62e-05	0.00982	6.67e-09	0.000893	1.75e-05	0.00537	0.00361	0.18	0.00887	0.275	0.0114	0.476	replication fork	C
GO:0005667	270	2.89e-06	0.00302	5.12e-07	0.00392	0.000117	0.0116	3.22e-06	0.00289	0.000551	0.049	0.000481	0.0233	0.001	0.0362	2.37e-05	0.007	transcription factor complex	C
GO:0005669	20	0.004	0.212	0.0718	1	0.00581	0.469	0.111	1	0.0291	1	0.1	1	0.0573	1	0.2	1	transcription factor TFIID complex	C
GO:0005681	128	3.68e-13	0	1.09e-10	0	1.32e-10	0.000795	3.34e-11	0	6.42e-10	0	6.48e-06	0.00587	0.000218	0.012	0.00826	0.428	spliceosome complex	C
GO:0005689	14	0.017	1	0.0142	0.607	0.019	1	0.00238	0.139	0.00303	0.213	0.0212	0.756	0.763	1	0.978	1	minor (U12-dependent) spliceosome complex	C
GO:0005694	505	3.23e-10	0.00257	4.25e-11	0	1.99e-13	0.000708	4.13e-16	0	7.38e-06	0.002	5.98e-05	0.00966	0.00596	0.275	0.000493	0.03	chromosome	C
GO:0005720	28	0.000226	0.0172	0.00368	0.188	0.000223	0.021	0.00327	0.176	0.0138	0.692	0.0167	0.668	0.015	0.478	0.0893	1	nuclear heterochromatin	C
GO:0005730	153	2.99e-10	0.00257	9.64e-07	0.00392	5.73e-11	0.000708	1.34e-07	0.00289	4.8e-08	0.000959	0.00103	0.09	0.0196	0.636	0.0203	0.736	nucleolus	C
GO:0005732	14	0.00976	0.608	0.167	1	0.0457	1	0.163	1	0.00826	0.692	0.358	1	0.0214	0.636	0.0833	1	small nucleolar ribonucleoprotein complex	C
GO:0005737	6418	0	0	0	0	0	0	0	0	0	0	0	0	0	0	0	0	cytoplasm	C
GO:0005739	994	7.04e-29	0	3.64e-25	0	8.87e-20	0	1.01e-17	0	8.87e-20	0	5.55e-22	0	2.86e-13	0	2.28e-06	0.002	mitochondrion	C
GO:0005740	420	7.63e-14	0	1.05e-12	0	5.01e-09	0.00098	8.64e-11	0	4.85e-12	0	5.6e-10	0.00062	2.19e-06	0.000823	0.000446	0.03	mitochondrial envelope	C
GO:0005741	67	0.00183	0.212	4.98e-06	0.00451	0.0262	1	0.000166	0.013	0.00945	0.692	0.000325	0.0233	0.00221	0.084	0.00457	0.201	mitochondrial outer membrane	C
GO:0005743	315	4.24e-09	0.00257	4.69e-08	0.000959	1.22e-06	0.002	4.58e-06	0.00289	2.05e-08	0.000959	4.39e-06	0.0029	0.00136	0.0614	0.000511	0.03	mitochondrial inner membrane	C
GO:0005746	67	0.0117	0.608	0.016	0.763	0.126	1	0.023	0.937	0.0226	1	0.0601	1	0.0326	0.838	0.093	1	mitochondrial electron transport chain	C
GO:0005747	15	0.0239	1	0.0352	1	0.0442	1	0.149	1	0.225	1	0.109	1	0.0582	1	0.0671	1	respiratory chain complex I (sensu Eukaryota)	C
GO:0005758	26	0.0215	1	0.0618	1	0.0934	1	0.149	1	0.0123	0.692	0.0352	1	0.054	1	0.317	1	mitochondrial intermembrane space	C
GO:0005759	156	2.6e-06	0.00302	8.58e-05	0.015	2.61e-05	0.003	0.00857	0.492	0.00411	0.213	0.000124	0.013	0.00259	0.084	0.0242	0.999	mitochondrial matrix	C
GO:0005761	46	0.000134	0.0143	0.00954	0.469	5.17e-05	0.00982	0.0881	1	0.00353	0.213	0.00196	0.127	0.153	1	0.196	1	mitochondrial ribosome	C
GO:0005762	24	0.033	1	0.142	1	0.0147	0.653	0.14	1	0.0292	1	0.141	1	0.522	1	0.459	1	mitochondrial large ribosomal subunit	C
GO:0005763	14	1.63e-05	0.007	0.0275	1	0.00144	0.079	0.112	1	0.0107	0.692	0.0104	0.503	0.146	1	0.0973	1	mitochondrial small ribosomal subunit	C
GO:0005764	201	1.66e-06	0.00276	3.09e-07	0.00392	0.00198	0.095	0.000148	0.013	0.000325	0.049	2.95e-05	0.00952	0.000141	0.008	0.000556	0.03	lysosome	C
GO:0005765	54	0.00117	0.0886	8.97e-06	0.00451	0.0548	1	0.00487	0.288	0.023	1	0.000846	0.0448	0.0293	0.838	0.00254	0.079	lysosomal membrane	C
GO:0005768	205	5.41e-08	0.00257	9.36e-14	0	4.5e-06	0.00291	2.57e-10	0	0.000135	0.027	1.71e-08	0.000878	9.78e-05	0.008	3.04e-05	0.007	endosome	C
GO:0005769	61	0.000471	0.044	3.31e-05	0.007	0.00108	0.079	0.000278	0.042	0.00122	0.12	0.000319	0.0233	0.178	1	0.0573	1	early endosome	C
GO:0005770	60	6.85e-06	0.00362	2.7e-05	0.007	0.000416	0.04	0.00105	0.094	0.00164	0.12	0.00479	0.266	0.00591	0.275	0.00364	0.127	late endosome	C
GO:0005771	11	0.0163	1	0.00475	0.261	0.039	1	0.0291	1	0.159	1	0.0714	1	0.299	1	0.0518	1	multivesicular body	C
GO:0005773	222	1.26e-07	0.00257	7.5e-07	0.00392	0.00026	0.04	0.000135	0.013	5.65e-05	0.024	3.68e-05	0.00966	0.000198	0.012	0.00195	0.079	vacuole	C
GO:0005774	66	0.000288	0.019	2.89e-05	0.007	0.0225	1	0.00541	0.288	0.0123	0.692	0.00059	0.032	0.015	0.478	0.00934	0.428	vacuolar membrane	C
GO:0005777	99	0.00741	0.315	0.0016	0.0965	0.0721	1	0.016	0.647	0.00966	0.692	0.00342	0.151	0.0498	1	0.0462	1	peroxisome	C
GO:0005778	40	0.00167	0.212	0.0105	0.469	0.0502	1	0.0261	1	0.0135	0.692	0.0579	1	0.00282	0.084	0.0161	0.656	peroxisomal membrane	C
GO:0005783	848	3.26e-09	0.00257	1.03e-10	0	3.97e-06	0.00291	1.05e-07	0.00289	2.87e-07	0.000959	6.37e-09	0.000878	0.000212	0.012	0.000333	0.03	endoplasmic reticulum	C
GO:0005788	60	0.0461	1	0.03	1	0.116	1	0.0251	1	0.0259	1	0.0187	0.668	0.113	1	0.303	1	endoplasmic reticulum lumen	C
GO:0005789	469	4.54e-06	0.00302	1.31e-06	0.00392	0.000778	0.049	6.97e-05	0.013	0.000206	0.049	3.21e-05	0.00952	0.000437	0.024	0.0014	0.06	endoplasmic reticulum membrane	C
GO:0005791	16	0.115	1	0.184	1	0.181	1	0.127	1	0.269	1	0.123	1	0.0672	1	0.69	1	rough endoplasmic reticulum	C
GO:0005792	177	0.797	1	0.399	1	0.828	1	0.774	1	0.453	1	0.203	1	0.897	1	0.161	1	microsome	C
GO:0005793	25	0.0826	1	0.0138	0.607	0.0537	1	0.0266	1	0.0578	1	0.0209	0.756	0.559	1	0.155	1	ER-Golgi intermediate compartment	C
GO:0005794	653	1.78e-14	0	2.47e-16	0	5.97e-09	0.00098	1.15e-12	0	2.88e-11	0	1.63e-09	0.000878	4.31e-06	0.001	3.09e-08	0	Golgi apparatus	C
GO:0005795	21	0.0332	1	0.00175	0.0965	0.00483	0.308	0.0104	0.572	0.267	1	0.00961	0.503	0.587	1	0.0308	0.999	Golgi stack	C
GO:0005798	43	8e-06	0.00362	1.2e-05	0.00451	0.00548	0.469	0.000155	0.013	0.000292	0.049	9.06e-05	0.011	0.0015	0.0614	0.00432	0.201	Golgi-associated vesicle	C
GO:0005801	12	0.00031	0.031	0.0037	0.188	0.0617	1	0.0183	0.937	0.00231	0.12	0.0139	0.668	0.0516	1	0.047	1	Golgi cis face	C
GO:0005802	43	1.79e-06	0.003	2.35e-05	0.007	0.00138	0.079	0.000126	0.013	0.000435	0.049	0.00515	0.266	0.000249	0.012	0.0142	0.476	Golgi trans face	C
GO:0005811	12	0.0169	1	0.0117	0.607	0.0291	1	0.0565	1	0.0219	1	0.658	1	0.421	1	0.0644	1	lipid particle	C
GO:0005813	135	1.42e-06	0.00276	1.82e-07	0.00392	2.81e-06	0.00291	1.29e-05	0.00289	0.000166	0.049	3.36e-05	0.00952	0.00504	0.223	0.00364	0.127	centrosome	C
GO:0005814	11	0.0801	1	0.165	1	0.19	1	0.504	1	0.0252	1	0.0854	1	0.385	1	0.434	1	centriole	C
GO:0005815	153	2.8e-06	0.00302	2.66e-07	0.00392	6.6e-06	0.00291	1.62e-05	0.00957	0.000331	0.049	2.52e-05	0.00587	0.00476	0.223	0.00454	0.201	microtubule organizing center	C
GO:0005819	87	5.64e-08	0.00257	8.02e-06	0.00451	7.4e-09	0.00098	6.68e-06	0.00289	4.39e-05	0.00658	0.000397	0.0233	0.00175	0.084	0.0089	0.428	spindle	C
GO:0005829	472	1.21e-11	0.00257	3.1e-15	0	1.12e-10	0.000795	8.34e-12	0	1.33e-06	0.00169	8.92e-14	0.00062	0.000667	0.0344	0.000337	0.03	cytosol	C
GO:0005833	12	0.873	1	0.187	1	0.496	1	0.104	1	0.998	1	0.129	1	0.764	1	0.785	1	hemoglobin complex	C
GO:0005834	38	0.432	1	0.395	1	0.546	1	0.8	1	0.684	1	0.591	1	0.253	1	0.0694	1	heterotrimeric G-protein complex	C
GO:0005839	21	0.341	1	0.196	1	0.141	1	0.186	1	0.604	1	0.0173	0.668	0.671	1	0.858	1	proteasome core complex (sensu Eukaryota)	C
GO:0005840	495	9.97e-11	0.00257	0.00171	0.0965	1.58e-11	0.000708	0.00223	0.139	6.73e-08	0.000959	0.000741	0.0448	0.00167	0.084	0.246	1	ribosome	C
GO:0005856	1130	4.37e-09	0.00257	4.25e-14	0	5.73e-06	0.00291	7.68e-09	0.000893	4.86e-06	0.00169	3.15e-08	0.000903	3.66e-06	0.001	5.55e-11	0	cytoskeleton	C
GO:0005863	15	0.906	1	0.627	1	0.998	1	0.63	1	0.7	1	0.699	1	0.803	1	0.4	1	striated muscle thick filament	C
GO:0005865	12	0.0356	1	0.144	1	0.121	1	0.349	1	0.0944	1	0.21	1	0.0582	1	0.165	1	striated muscle thin filament	C
GO:0005871	12	0.0543	1	0.0591	1	0.0837	1	0.0312	1	0.357	1	0.0704	1	0.0979	1	0.529	1	kinesin complex	C
GO:0005874	232	5.81e-09	0.00257	4.06e-09	0.00089	2.76e-09	0.00098	4.63e-08	0.00289	0.000322	0.049	4.51e-05	0.00966	5.22e-06	0.001	0.00023	0.0233	microtubule	C
GO:0005875	115	9.08e-05	0.0143	5.91e-05	0.007	3.39e-05	0.00982	0.000415	0.042	0.0228	1	0.00207	0.127	0.00139	0.0614	0.0155	0.656	microtubule associated complex	C
GO:0005876	14	4.59e-05	0.00952	0.00694	0.312	0.00223	0.103	0.0336	1	1.23e-05	0.003	0.0885	1	0.00525	0.223	0.00653	0.428	spindle microtubule	C
GO:0005882	164	1	1	1	1	1	1	1	1	1	1	1	1	0.999	1	0.999	1	intermediate filament	C
GO:0005884	36	0.0235	1	0.0436	1	0.183	1	0.223	1	0.0607	1	0.0471	1	0.0107	0.275	0.109	1	actin filament	C
GO:0005886	3370	1	1	1	1	1	1	1	1	1	1	1	1	1	1	0.969	1	plasma membrane	C
GO:0005887	507	0.941	1	0.245	1	0.962	1	0.832	1	0.992	1	0.329	1	0.219	1	0.00264	0.0832	integral to plasma membrane	C
GO:0005891	27	0.86	1	0.692	1	0.99	1	0.982	1	0.991	1	0.827	1	0.229	1	0.0714	1	voltage-gated calcium channel complex	C
GO:0005892	13	0.539	1	0.935	1	0.965	1	0.945	1	0.963	1	0.99	1	0.0148	0.478	0.314	1	nicotinic acetylcholine-gated receptor-channel complex	C
GO:0005901	34	0.0134	0.608	0.0019	0.13	0.032	1	0.00651	0.333	0.0413	1	0.0198	0.756	0.0472	1	0.0071	0.428	caveola	C
GO:0005902	18	0.348	1	0.0496	1	0.396	1	0.109	1	0.536	1	0.0621	1	0.16	1	0.25	1	microvillus	C
GO:0005903	29	0.537	1	0.0506	1	0.844	1	0.225	1	0.412	1	0.0526	1	0.476	1	0.131	1	brush border	C
GO:0005905	33	0.0163	1	1.31e-06	0.00392	0.0242	1	0.000137	0.013	0.167	1	0.000405	0.0233	0.0311	0.838	0.00109	0.06	coated pit	C
GO:0005911	190	0.00855	0.608	0.0273	1	0.211	1	0.433	1	0.276	1	0.225	1	0.000301	0.0229	0.000141	0.016	intercellular junction	C
GO:0005912	79	0.00332	0.212	0.00415	0.188	0.0928	1	0.0267	1	0.00232	0.12	0.047	1	0.0185	0.636	0.00312	0.127	adherens junction	C
GO:0005913	30	0.0595	1	0.0846	1	0.148	1	0.0659	1	0.0528	1	0.271	1	0.415	1	0.248	1	cell-cell adherens junction	C
GO:0005921	31	0.0476	1	0.0649	1	0.271	1	0.389	1	0.251	1	0.128	1	0.017	0.488	0.0281	0.999	gap junction	C
GO:0005922	25	0.0927	1	0.164	1	0.564	1	0.604	1	0.325	1	0.361	1	0.0199	0.636	0.0298	0.999	connexon complex	C
GO:0005923	100	0.0263	1	0.0388	1	0.353	1	0.306	1	0.161	1	0.43	1	0.0034	0.223	0.000734	0.06	tight junction	C
GO:0005924	45	0.0171	1	0.0194	1	0.331	1	0.119	1	0.0122	0.692	0.0622	1	0.0101	0.275	0.00506	0.201	cell-substrate adherens junction	C
GO:0005925	41	0.0176	1	0.0358	1	0.26	1	0.151	1	0.014	0.692	0.0996	1	0.0145	0.478	0.0124	0.476	focal adhesion	C
GO:0005929	100	0.132	1	0.00455	0.261	0.482	1	0.0832	1	0.0465	1	0.00787	0.421	0.22	1	0.0331	1	cilium	C
GO:0005930	16	0.331	1	0.209	1	0.288	1	0.234	1	0.316	1	0.47	1	0.587	1	0.048	1	axoneme	C
GO:0005932	14	0.547	1	0.771	1	0.774	1	0.778	1	0.474	1	0.689	1	0.682	1	0.746	1	basal body	C
GO:0005938	92	0.00996	0.608	8.69e-08	0.00392	0.0171	1	8.32e-06	0.00289	0.131	1	0.00112	0.09	0.0557	1	0.000134	0.016	cell cortex	C
GO:0005941	45	0.612	1	0.134	1	0.497	1	0.474	1	0.809	1	0.107	1	0.4	1	0.0883	1	unlocalized protein complex	C
GO:0005942	18	0.608	1	0.0263	1	0.47	1	0.0388	1	0.844	1	0.0542	1	0.587	1	0.0467	1	phosphoinositide 3-kinase complex	C
GO:0005952	21	0.732	1	0.656	1	0.904	1	0.582	1	0.68	1	0.984	1	0.283	1	0.261	1	cAMP-dependent protein kinase complex	C
GO:0005964	15	0.534	1	0.0377	1	0.592	1	0.213	1	0.599	1	0.022	1	0.489	1	0.069	1	phosphorylase kinase complex	C
GO:0005975	498	0.000981	0.0886	6.06e-06	0.00451	0.00153	0.095	0.00124	0.094	0.0019	0.12	4.83e-07	0.002	0.217	1	0.0118	0.476	carbohydrate metabolism	P
GO:0005976	76	0.471	1	0.196	1	0.735	1	0.306	1	0.185	1	0.321	1	0.7	1	0.0673	1	polysaccharide metabolism	P
GO:0005977	46	0.334	1	0.159	1	0.436	1	0.386	1	0.414	1	0.211	1	0.386	1	0.0875	1	glycogen metabolism	P
GO:0005978	26	0.863	1	0.0774	1	0.938	1	0.484	1	0.626	1	0.0272	1	0.811	1	0.0757	1	glycogen biosynthesis	P
GO:0005996	196	0.000587	0.0886	3.84e-05	0.007	0.00174	0.095	0.0105	0.572	0.0329	1	8.22e-07	0.002	0.011	0.339	0.0437	1	monosaccharide metabolism	P
GO:0006006	151	0.00742	0.315	0.0014	0.0965	0.00496	0.308	0.171	1	0.147	1	2.55e-05	0.00587	0.0285	0.838	0.0483	1	glucose metabolism	P
GO:0006007	74	0.00235	0.212	7.85e-05	0.015	0.00127	0.079	0.0409	1	0.0101	0.692	4.25e-06	0.0029	0.327	1	0.0354	1	glucose catabolism	P
GO:0006013	10	0.025	1	0.0299	1	0.193	1	0.0462	1	0.0366	1	0.0343	1	0.1	1	0.133	1	mannose metabolism	P
GO:0006020	12	0.0176	1	0.0763	1	0.0281	1	0.0701	1	0.0566	1	0.0866	1	0.141	1	0.767	1	myo-inositol metabolism	P
GO:0006022	31	0.0734	1	0.291	1	0.512	1	0.0454	1	0.067	1	0.361	1	0.0946	1	0.831	1	aminoglycan metabolism	P
GO:0006023	15	0.219	1	0.297	1	0.641	1	0.00986	0.572	0.164	1	0.469	1	0.311	1	0.939	1	aminoglycan biosynthesis	P
GO:0006024	15	0.219	1	0.297	1	0.641	1	0.00986	0.572	0.164	1	0.469	1	0.311	1	0.939	1	glycosaminoglycan biosynthesis	P
GO:0006029	27	0.86	1	0.702	1	0.996	1	0.204	1	0.62	1	0.999	1	0.384	1	0.412	1	proteoglycan metabolism	P
GO:0006030	12	0.953	1	0.957	1	0.996	1	0.946	1	0.577	1	0.906	1	0.996	1	0.754	1	chitin metabolism	P
GO:0006032	10	0.917	1	0.967	1	0.978	1	0.876	1	0.579	1	0.975	1	0.985	1	0.938	1	chitin catabolism	P
GO:0006040	34	0.905	1	0.662	1	0.957	1	0.558	1	0.371	1	0.301	1	0.963	1	0.948	1	amino sugar metabolism	P
GO:0006041	26	0.662	1	0.451	1	0.838	1	0.407	1	0.156	1	0.234	1	0.81	1	0.889	1	glucosamine metabolism	P
GO:0006043	11	0.9	1	0.764	1	0.874	1	0.672	1	0.593	1	0.658	1	0.988	1	0.856	1	glucosamine catabolism	P
GO:0006044	26	0.662	1	0.451	1	0.838	1	0.407	1	0.156	1	0.234	1	0.81	1	0.889	1	N-acetylglucosamine metabolism	P
GO:0006046	10	0.917	1	0.967	1	0.978	1	0.876	1	0.579	1	0.975	1	0.985	1	0.938	1	N-acetylglucosamine catabolism	P
GO:0006066	397	3.49e-05	0.007	9.79e-07	0.00392	0.000331	0.04	0.000915	0.094	0.00325	0.213	1.81e-06	0.002	0.000835	0.0344	0.000662	0.06	alcohol metabolism	P
GO:0006071	34	0.0133	0.608	0.0329	1	0.0309	1	0.0204	0.937	0.0571	1	0.162	1	0.105	1	0.199	1	glycerol metabolism	P
GO:0006072	19	0.181	1	0.0855	1	0.232	1	0.234	1	0.289	1	0.12	1	0.223	1	0.149	1	glycerol-3-phosphate metabolism	P
GO:0006073	46	0.334	1	0.159	1	0.436	1	0.386	1	0.414	1	0.211	1	0.386	1	0.0875	1	glucan metabolism	P
GO:0006081	16	0.0385	1	0.223	1	0.0225	1	0.239	1	0.111	1	0.167	1	0.213	1	0.503	1	aldehyde metabolism	P
GO:0006082	642	4.34e-06	0.00302	3.48e-10	0	0.00027	0.04	7.79e-06	0.00289	0.00094	0.12	2.08e-08	0.000878	6.73e-05	0.008	4.18e-06	0.00291	organic acid metabolism	P
GO:0006084	31	0.0182	1	0.032	1	0.0237	1	0.0991	1	0.0621	1	0.0539	1	0.27	1	0.121	1	acetyl-CoA metabolism	P
GO:0006090	30	0.261	1	0.164	1	0.186	1	0.293	1	0.789	1	0.613	1	0.0736	1	0.109	1	pyruvate metabolism	P
GO:0006091	269	0.00423	0.214	0.000215	0.024	0.00332	0.203	0.0197	0.937	0.0341	1	0.000102	0.011	0.294	1	0.00862	0.428	generation of precursor metabolites and energy	P
GO:0006092	123	0.000968	0.0886	1.12e-05	0.00451	0.000336	0.04	0.0157	0.647	0.0234	1	3.96e-06	0.0029	0.161	1	0.0116	0.476	main pathways of carbohydrate metabolism	P
GO:0006094	24	0.117	1	0.0526	1	0.166	1	0.142	1	0.461	1	0.361	1	0.033	0.838	0.0624	1	gluconeogenesis	P
GO:0006096	66	0.0304	1	0.000532	0.0474	0.00996	0.653	0.0957	1	0.0587	1	6.58e-05	0.00966	0.438	1	0.0378	1	glycolysis	P
GO:0006099	23	0.0164	1	0.042	1	0.0305	1	0.0914	1	0.036	1	0.0466	1	0.347	1	0.182	1	tricarboxylic acid cycle	P
GO:0006100	19	0.615	1	0.0914	1	0.487	1	0.2	1	0.835	1	0.0724	1	0.675	1	0.203	1	tricarboxylic acid cycle intermediate metabolism	P
GO:0006109	13	0.514	1	0.12	1	0.768	1	0.37	1	0.972	1	0.183	1	0.0449	1	0.0793	1	regulation of carbohydrate metabolism	P
GO:0006112	50	0.432	1	0.178	1	0.454	1	0.493	1	0.431	1	0.117	1	0.565	1	0.143	1	energy reserve metabolism	P
GO:0006118	42	0.0979	1	0.256	1	0.212	1	0.251	1	0.127	1	0.238	1	0.261	1	0.385	1	electron transport	P
GO:0006119	76	0.229	1	0.403	1	0.207	1	0.288	1	0.243	1	0.383	1	0.755	1	0.645	1	oxidative phosphorylation	P
GO:0006120	17	0.176	1	0.568	1	0.231	1	0.673	1	0.237	1	0.489	1	0.181	1	0.289	1	mitochondrial electron transport, NADH to ubiquinone	P
GO:0006139	3843	0	0	0	0	0	0	0	0	2.1e-40	0	4.14e-38	0	2.14e-10	0	1.02e-15	0	nucleobase, nucleoside, nucleotide and nucleic acid metabolism	P
GO:0006140	18	0.0482	1	0.0711	1	0.225	1	0.178	1	0.0508	1	0.118	1	0.0381	0.838	0.0447	1	regulation of nucleotide metabolism	P
GO:0006163	93	0.00201	0.212	0.000422	0.0474	0.00506	0.308	0.00102	0.094	0.00103	0.12	0.0032	0.151	0.418	1	0.0562	1	purine nucleotide metabolism	P
GO:0006164	77	0.024	1	0.0163	0.763	0.0297	1	0.0118	0.647	0.00879	0.692	0.0546	1	0.809	1	0.229	1	purine nucleotide biosynthesis	P
GO:0006171	21	0.309	1	0.137	1	0.764	1	0.548	1	0.335	1	0.311	1	0.0909	1	0.0418	1	cAMP biosynthesis	P
GO:0006182	13	0.304	1	0.611	1	0.747	1	0.457	1	0.161	1	0.868	1	0.338	1	0.527	1	cGMP biosynthesis	P
GO:0006183	13	0.0409	1	0.000853	0.087	0.11	1	0.0171	0.647	0.00778	0.692	0.00436	0.266	0.505	1	0.05	1	GTP biosynthesis	P
GO:0006206	10	0.0365	1	0.596	1	0.0609	1	0.355	1	0.0156	0.692	0.926	1	0.268	1	0.385	1	pyrimidine base metabolism	P
GO:0006213	10	0.404	1	0.951	1	0.364	1	0.801	1	0.407	1	0.868	1	0.359	1	0.94	1	pyrimidine nucleoside metabolism	P
GO:0006220	25	0.0721	1	0.00879	0.469	0.079	1	0.00837	0.492	0.0389	1	0.0123	0.503	0.302	1	0.157	1	pyrimidine nucleotide metabolism	P
GO:0006221	21	0.0569	1	0.00384	0.188	0.0754	1	0.00851	0.492	0.0382	1	0.0107	0.503	0.165	1	0.0364	1	pyrimidine nucleotide biosynthesis	P
GO:0006228	12	0.0611	1	0.00224	0.171	0.103	1	0.0315	1	0.0182	0.79	0.00347	0.151	0.56	1	0.0852	1	UTP biosynthesis	P
GO:0006241	13	0.0696	1	0.00159	0.0965	0.108	1	0.0155	0.647	0.0236	1	0.0114	0.503	0.554	1	0.0521	1	CTP biosynthesis	P
GO:0006259	811	6.55e-20	0	8.36e-23	0	1.61e-21	0	3.05e-30	0	9.04e-12	0	1.91e-10	0.00062	0.000186	0.008	2.32e-07	0.000938	DNA metabolism	P
GO:0006260	167	7.09e-08	0.00257	2.32e-07	0.00392	8.66e-06	0.00291	2.42e-06	0.00289	4.66e-06	0.00169	5.45e-05	0.00966	0.0052	0.223	0.000741	0.06	DNA replication	P
GO:0006261	74	0.000121	0.0143	1.22e-05	0.00451	0.00129	0.079	0.000793	0.069	0.00138	0.12	5.34e-05	0.00966	0.0693	1	0.0409	1	DNA-dependent DNA replication	P
GO:0006265	23	0.087	1	0.083	1	0.027	1	0.0892	1	0.0572	1	0.234	1	0.998	1	0.208	1	DNA topological change	P
GO:0006268	12	0.0102	0.608	0.0452	1	0.00988	0.653	0.0162	0.647	0.0142	0.692	0.0881	1	0.218	1	0.867	1	DNA unwinding during replication	P
GO:0006270	20	0.009	0.608	0.0182	1	0.0645	1	0.0214	0.937	0.0213	0.956	0.0417	1	0.329	1	0.217	1	DNA replication initiation	P
GO:0006275	30	0.00102	0.0886	0.00137	0.0965	0.0237	1	0.0516	1	0.00559	0.375	0.000659	0.032	0.0194	0.636	0.101	1	regulation of DNA replication	P
GO:0006281	242	3.93e-11	0.00257	7.5e-13	0	2.41e-10	0.000795	7.59e-12	0	5.92e-08	0.000959	1.52e-06	0.002	0.0159	0.488	3.78e-05	0.007	DNA repair	P
GO:0006284	23	0.0052	0.272	0.508	1	0.0131	0.653	0.714	1	0.00432	0.213	0.617	1	0.634	1	0.127	1	base-excision repair	P
GO:0006289	33	0.00793	0.608	0.0974	1	0.00871	0.653	0.175	1	0.0125	0.692	0.434	1	0.184	1	0.039	1	nucleotide-excision repair	P
GO:0006298	14	0.564	1	0.0502	1	0.408	1	0.289	1	0.855	1	0.03	1	0.511	1	0.0297	0.999	mismatch repair	P
GO:0006302	32	0.0135	0.608	1.52e-05	0.00451	0.00617	0.469	2.86e-05	0.00957	0.0393	1	0.000928	0.09	0.33	1	0.011	0.476	double-strand break repair	P
GO:0006304	38	0.821	1	0.803	1	0.562	1	0.465	1	0.984	1	0.94	1	0.604	1	0.7	1	DNA modification	P
GO:0006305	37	0.807	1	0.817	1	0.514	1	0.486	1	0.98	1	0.923	1	0.645	1	0.767	1	DNA alkylation	P
GO:0006306	37	0.807	1	0.817	1	0.514	1	0.486	1	0.98	1	0.923	1	0.645	1	0.767	1	DNA methylation	P
GO:0006308	18	0.00239	0.212	0.000776	0.081	0.00206	0.095	0.000477	0.042	0.00789	0.692	0.00293	0.144	0.157	1	0.0947	1	DNA catabolism	P
GO:0006309	10	0.00701	0.315	0.0236	1	0.0118	0.653	0.0124	0.647	0.0213	0.956	0.0332	1	0.0327	0.838	0.373	1	DNA fragmentation during apoptosis	P
GO:0006310	86	0.00017	0.0172	6.88e-08	0.00392	0.00013	0.0116	3.75e-07	0.00289	0.029	1	0.000321	0.0233	0.0149	0.478	0.000287	0.03	DNA recombination	P
GO:0006323	377	2.76e-08	0.00257	1.15e-10	0	2.73e-10	0.000795	5.45e-16	0	0.000825	0.12	1.19e-05	0.00587	0.00261	0.084	0.00133	0.06	DNA packaging	P
GO:0006325	375	4.3e-08	0.00257	2.79e-10	0	4.63e-10	0.000795	1.77e-15	0	0.00101	0.12	1.76e-05	0.00587	0.00271	0.084	0.00213	0.079	establishment and/or maintenance of chromatin architecture	P
GO:0006333	222	0.0507	1	0.107	1	0.00696	0.469	0.00113	0.094	0.49	1	0.484	1	0.137	1	0.667	1	chromatin assembly or disassembly	P
GO:0006334	174	0.804	1	0.904	1	0.286	1	0.132	1	0.985	1	0.982	1	0.662	1	0.997	1	nucleosome assembly	P
GO:0006338	49	1.01e-08	0.00257	8.15e-11	0	1.28e-07	0.002	1.14e-10	0	0.000119	0.027	1.65e-05	0.00587	5.82e-05	0.008	1.79e-06	0.002	chromatin remodeling	P
GO:0006342	16	0.00233	0.212	0.00235	0.171	0.00662	0.469	0.00414	0.288	0.0187	0.79	0.0935	1	0.00657	0.275	0.0135	0.476	chromatin silencing	P
GO:0006350	2593	3.34e-26	0	4.68e-34	0	9.61e-28	0	2.53e-36	0	7.01e-19	0	7.37e-23	0	1.2e-05	0.00363	2.72e-09	0	transcription	P
GO:0006351	2397	2.56e-22	0	1.45e-28	0	1.51e-23	0	9.1e-32	0	3.54e-17	0	9.35e-20	0	0.000147	0.008	4.86e-07	0.00192	transcription, DNA-dependent	P
GO:0006352	64	9.53e-05	0.0143	9.59e-05	0.015	2.92e-05	0.003	2.32e-06	0.00289	0.000525	0.049	0.00288	0.144	0.0732	1	0.11	1	transcription initiation	P
GO:0006354	11	0.00016	0.0172	0.0444	1	0.0145	0.653	0.02	0.937	0.0219	1	0.0466	1	0.0811	1	0.869	1	RNA elongation	P
GO:0006355	2352	3.39e-21	0	9.1e-28	0	3.54e-22	0	7.72e-30	0	6.7e-16	0	1.6e-19	0	0.00012	0.008	3.06e-07	0.001	regulation of transcription, DNA-dependent	P
GO:0006357	531	4e-06	0.00302	7.84e-06	0.00451	2.54e-07	0.002	9.36e-05	0.013	0.0276	1	0.00596	0.421	0.000218	0.012	4.33e-05	0.007	regulation of transcription from RNA polymerase II promoter	P
GO:0006364	69	1.68e-07	0.00257	0.00116	0.0965	1.18e-07	0.002	0.000644	0.042	1.7e-06	0.00169	0.019	0.668	0.069	1	0.227	1	rRNA processing	P
GO:0006366	579	8.36e-07	0.00276	2.67e-06	0.00392	1.67e-08	0.00098	2.8e-05	0.00957	0.0117	0.692	0.00189	0.127	0.00041	0.024	0.000156	0.016	transcription from RNA polymerase II promoter	P
GO:0006367	23	0.00267	0.212	0.00163	0.0965	0.000728	0.049	0.000624	0.042	0.0113	0.692	0.0229	1	0.156	1	0.161	1	transcription initiation from RNA polymerase II promoter	P
GO:0006376	10	0.0639	1	0.0807	1	0.111	1	0.079	1	0.0871	1	0.202	1	0.0133	0.478	0.261	1	mRNA splice site selection	P
GO:0006396	411	2.86e-29	0	2.26e-25	0	6.87e-27	0	1.08e-23	0	1.1e-17	0	1.49e-13	0.00062	1.58e-09	0	1.31e-07	0.000938	RNA processing	P
GO:0006397	244	3.46e-20	0	2.03e-18	0	7.38e-18	0	8.94e-18	0	5.56e-13	0	9.19e-10	0.00062	2.01e-07	0	9.62e-06	0.007	mRNA processing	P
GO:0006399	127	3.62e-07	0.00257	1.32e-05	0.00451	3.4e-05	0.00982	4.6e-05	0.0107	2.95e-05	0.00633	0.000135	0.013	0.001	0.0362	0.0498	1	tRNA metabolism	P
GO:0006400	11	0.11	1	0.465	1	0.387	1	0.88	1	0.128	1	0.775	1	0.11	1	0.147	1	tRNA modification	P
GO:0006401	35	0.000249	0.019	0.00106	0.0965	0.00155	0.095	0.0126	0.647	0.00208	0.12	0.00233	0.127	0.027	0.838	0.0286	0.999	RNA catabolism	P
GO:0006402	29	0.000361	0.031	0.00328	0.188	0.00134	0.079	0.0129	0.647	0.00224	0.12	0.0183	0.668	0.0325	0.838	0.0213	0.999	mRNA catabolism	P
GO:0006403	62	1.17e-06	0.00276	3.54e-10	0	1.4e-05	0.003	5.91e-10	0	9.49e-06	0.002	1.59e-05	0.00587	0.275	1	0.00127	0.06	RNA localization	P
GO:0006405	21	9.33e-05	0.0143	0.000224	0.024	0.00129	0.079	0.0012	0.094	9.3e-05	0.027	0.00133	0.09	0.0822	1	0.0116	0.476	RNA export from nucleus	P
GO:0006406	16	0.000701	0.0886	0.000496	0.0474	0.00912	0.653	0.000694	0.042	0.00019	0.049	0.00327	0.151	0.113	1	0.047	1	mRNA export from nucleus	P
GO:0006412	941	3.88e-17	0	5.12e-13	0	1.65e-15	0	1.09e-09	0	1.64e-11	0	1.17e-09	0.00062	4.79e-07	0.000823	2.47e-06	0.002	protein biosynthesis	P
GO:0006413	65	1.02e-05	0.007	3.09e-07	0.00392	2.78e-07	0.002	1.19e-05	0.00289	0.000402	0.049	6.2e-06	0.00587	0.0644	1	0.00832	0.428	translational initiation	P
GO:0006414	24	0.205	1	0.0518	1	0.02	1	0.00873	0.492	0.188	1	0.245	1	0.774	1	0.201	1	translational elongation	P
GO:0006417	158	0.00436	0.214	4.87e-05	0.007	0.0262	1	0.006	0.288	0.0703	1	0.00949	0.503	0.00476	0.223	0.000196	0.016	regulation of protein biosynthesis	P
GO:0006418	68	1.05e-05	0.007	0.000116	0.015	0.000235	0.021	0.000124	0.013	6.4e-05	0.024	0.000227	0.0233	0.0283	0.838	0.163	1	tRNA aminoacylation for protein translation	P
GO:0006445	31	8.54e-05	0.0143	1.64e-06	0.00392	9.13e-05	0.0116	6.17e-05	0.013	0.000832	0.12	0.00124	0.09	0.0115	0.339	0.00187	0.079	regulation of translation	P
GO:0006446	22	0.000277	0.019	4.87e-05	0.007	0.000945	0.049	0.000838	0.069	0.00126	0.12	0.00321	0.151	0.0113	0.339	0.0142	0.476	regulation of translational initiation	P
GO:0006457	150	2.74e-11	0.00257	1.97e-11	0	3.84e-08	0.00098	1.18e-11	0	2.23e-08	0.000959	6.18e-06	0.00587	2.17e-05	0.004	0.00163	0.06	protein folding	P
GO:0006461	383	0.02	1	0.00435	0.188	0.00315	0.135	7.12e-05	0.013	0.336	1	0.0278	1	0.0711	1	0.533	1	protein complex assembly	P
GO:0006464	1800	2.61e-24	0	0	0	3.13e-23	0	1.03e-39	0	1.19e-15	0	2.25e-31	0	1.21e-06	0.000823	8.62e-24	0	protein modification	P
GO:0006468	748	0.000391	0.031	1.98e-12	0	0.000271	0.04	4.97e-08	0.00289	0.00549	0.375	2.52e-08	0.000903	0.0635	1	1.07e-08	0	protein amino acid phosphorylation	P
GO:0006469	51	0.0482	1	7.01e-06	0.00451	0.0273	1	0.000234	0.013	0.421	1	0.000116	0.013	0.0739	1	0.000793	0.06	negative regulation of protein kinase activity	P
GO:0006470	135	0.00771	0.608	0.000149	0.015	0.00704	0.469	0.000787	0.069	0.311	1	0.0251	1	0.00274	0.084	0.00188	0.079	protein amino acid dephosphorylation	P
GO:0006471	16	0.00741	0.315	0.0488	1	0.101	1	0.29	1	0.0376	1	0.131	1	0.0511	1	0.161	1	protein amino acid ADP-ribosylation	P
GO:0006473	16	0.0166	1	0.00151	0.0965	0.0174	1	0.00541	0.288	0.254	1	0.00457	0.266	0.533	1	0.0151	0.656	protein amino acid acetylation	P
GO:0006476	19	0.0124	0.608	0.00748	0.312	0.0474	1	0.0121	0.647	0.00224	0.12	0.06	1	0.165	1	0.172	1	protein amino acid deacetylation	P
GO:0006479	36	3.25e-05	0.007	9.32e-08	0.00392	7.06e-05	0.0107	6.69e-07	0.00289	0.00222	0.12	3.81e-05	0.00966	0.0128	0.478	0.000706	0.06	protein amino acid methylation	P
GO:0006486	88	0.0497	1	0.0174	0.763	0.146	1	0.0959	1	0.26	1	0.0615	1	0.00671	0.275	0.00635	0.428	protein amino acid glycosylation	P
GO:0006487	22	0.00509	0.272	0.0183	1	0.0432	1	0.0604	1	0.0365	1	0.103	1	0.0408	1	0.00822	0.428	protein amino acid N-linked glycosylation	P
GO:0006493	15	0.708	1	0.101	1	0.556	1	0.267	1	0.911	1	0.231	1	0.556	1	0.0553	1	protein amino acid O-linked glycosylation	P
GO:0006497	49	0.118	1	0.0541	1	0.357	1	0.0395	1	0.081	1	0.137	1	0.631	1	0.35	1	protein amino acid lipidation	P
GO:0006505	28	0.0234	1	0.0261	1	0.0653	1	0.0717	1	0.0338	1	0.028	1	0.268	1	0.21	1	GPI anchor metabolism	P
GO:0006506	24	0.0489	1	0.0306	1	0.0805	1	0.017	0.647	0.0877	1	0.0331	1	0.462	1	0.521	1	GPI anchor biosynthesis	P
GO:0006508	827	0.0385	1	0.0002	0.024	0.0174	1	0.000846	0.069	0.443	1	0.0268	1	0.0731	1	6.41e-05	0.007	proteolysis	P
GO:0006509	13	0.128	1	0.027	1	0.148	1	0.0276	1	0.32	1	0.0537	1	0.243	1	0.369	1	membrane protein ectodomain proteolysis	P
GO:0006511	159	5.28e-05	0.00952	3.12e-09	0.00089	1.02e-06	0.002	6.09e-10	0	0.00713	0.692	7.65e-06	0.00587	0.188	1	0.000738	0.06	ubiquitin-dependent protein catabolism	P
GO:0006512	551	1.04e-18	0	4.18e-30	0	3.74e-20	0	1.04e-27	0	2.83e-14	0	4.5e-21	0	0.00615	0.275	5.21e-09	0	ubiquitin cycle	P
GO:0006515	12	0.0324	1	4.06e-06	0.00451	0.0391	1	0.000408	0.042	0.0725	1	0.0436	1	0.247	1	0.0716	1	misfolded or incompletely synthesized protein catabolism	P
GO:0006516	10	0.174	1	0.377	1	0.256	1	0.0949	1	0.168	1	0.462	1	0.41	1	0.892	1	glycoprotein catabolism	P
GO:0006518	16	0.922	1	0.797	1	0.868	1	0.521	1	1	1	0.692	1	0.628	1	0.996	1	peptide metabolism	P
GO:0006519	463	7.17e-05	0.0141	3.5e-06	0.00392	0.00116	0.079	0.000503	0.042	0.00374	0.213	1.25e-05	0.00587	0.00118	0.0614	0.00474	0.201	amino acid and derivative metabolism	P
GO:0006520	374	0.000361	0.031	4.15e-06	0.00451	0.00626	0.469	0.00116	0.094	0.0124	0.692	8.94e-06	0.00587	0.000859	0.0344	0.00161	0.06	amino acid metabolism	P
GO:0006521	97	0.885	1	0.511	1	0.932	1	0.798	1	0.986	1	0.513	1	0.16	1	0.132	1	regulation of amino acid metabolism	P
GO:0006536	10	0.273	1	0.196	1	0.384	1	0.407	1	0.284	1	0.137	1	0.448	1	0.403	1	glutamate metabolism	P
GO:0006541	18	0.393	1	0.0923	1	0.352	1	0.104	1	0.658	1	0.335	1	0.298	1	0.0394	1	glutamine metabolism	P
GO:0006544	12	0.771	1	0.0172	0.763	0.796	1	0.00919	0.572	0.647	1	0.0501	1	0.704	1	0.079	1	glycine metabolism	P
GO:0006547	11	0.648	1	0.573	1	0.878	1	0.722	1	0.494	1	0.643	1	0.326	1	0.253	1	histidine metabolism	P
GO:0006548	11	0.648	1	0.573	1	0.878	1	0.722	1	0.494	1	0.643	1	0.326	1	0.253	1	histidine catabolism	P
GO:0006570	14	0.545	1	0.409	1	0.593	1	0.654	1	0.603	1	0.567	1	0.57	1	0.0711	1	tyrosine metabolism	P
GO:0006575	156	0.0658	1	0.0108	0.469	0.106	1	0.0525	1	0.193	1	0.0165	0.668	0.12	1	0.0992	1	amino acid derivative metabolism	P
GO:0006576	89	0.328	1	0.171	1	0.418	1	0.154	1	0.385	1	0.39	1	0.219	1	0.26	1	biogenic amine metabolism	P
GO:0006582	11	0.738	1	0.781	1	0.767	1	0.847	1	0.965	1	0.984	1	0.132	1	0.126	1	melanin metabolism	P
GO:0006584	36	0.724	1	0.599	1	0.729	1	0.639	1	0.518	1	0.643	1	0.756	1	0.381	1	catecholamine metabolism	P
GO:0006586	11	0.731	1	0.441	1	0.997	1	0.66	1	0.427	1	0.543	1	0.325	1	0.21	1	indolalkylamine metabolism	P
GO:0006595	21	0.00427	0.214	0.000688	0.059	0.022	1	0.0003	0.042	0.106	1	0.00336	0.151	0.0102	0.275	0.129	1	polyamine metabolism	P
GO:0006596	12	0.026	1	0.0608	1	0.182	1	0.0406	1	0.172	1	0.11	1	0.0137	0.478	0.165	1	polyamine biosynthesis	P
GO:0006605	228	2.1e-07	0.00257	2.82e-08	0.000959	7.95e-06	0.00291	1.63e-08	0.000893	7.26e-06	0.002	0.000458	0.0233	0.00247	0.084	0.000975	0.06	protein targeting	P
GO:0006606	81	9.67e-05	0.0143	2.6e-07	0.00392	0.000128	0.0116	7.13e-06	0.00289	0.00217	0.12	0.00148	0.093	0.0805	1	0.000176	0.016	protein import into nucleus	P
GO:0006611	18	0.0255	1	0.00133	0.0965	0.095	1	0.00132	0.094	0.0389	1	0.0479	1	0.32	1	0.012	0.476	protein export from nucleus	P
GO:0006612	29	0.00311	0.212	0.0157	0.763	0.06	1	0.0169	0.647	0.0023	0.12	0.053	1	0.0416	1	0.209	1	protein targeting to membrane	P
GO:0006613	19	0.045	1	0.178	1	0.51	1	0.171	1	0.025	1	0.187	1	0.127	1	0.336	1	cotranslational protein targeting to membrane	P
GO:0006614	16	0.0277	1	0.197	1	0.523	1	0.18	1	0.0145	0.692	0.283	1	0.078	1	0.25	1	SRP-dependent cotranslational protein targeting to membrane	P
GO:0006625	10	0.0733	1	0.137	1	0.206	1	0.149	1	0.106	1	0.302	1	0.131	1	0.0762	1	protein targeting to peroxisome	P
GO:0006626	11	0.24	1	0.122	1	0.493	1	0.209	1	0.33	1	0.494	1	0.0556	1	0.0881	1	protein targeting to mitochondrion	P
GO:0006629	751	7.11e-07	0.00276	6.15e-13	0	7.87e-05	0.0116	2.47e-07	0.00289	3.3e-05	0.00633	2.77e-08	0.000903	0.000121	0.008	9.09e-11	0	lipid metabolism	P
GO:0006631	189	0.0042	0.214	1.59e-05	0.00451	0.0241	1	0.00639	0.333	0.0263	1	5.6e-05	0.00966	0.00701	0.275	0.00047	0.03	fatty acid metabolism	P
GO:0006633	84	0.011	0.608	0.00147	0.0965	0.0258	1	0.0554	1	0.025	1	0.00366	0.18	0.0344	0.838	0.00224	0.079	fatty acid biosynthesis	P
GO:0006635	16	0.0975	1	0.0479	1	0.0684	1	0.301	1	0.151	1	0.0928	1	0.665	1	0.106	1	fatty acid beta-oxidation	P
GO:0006637	16	0.746	1	0.0359	1	0.776	1	0.203	1	0.568	1	0.000544	0.032	0.796	1	0.33	1	acyl-CoA metabolism	P
GO:0006638	36	0.00338	0.212	0.0119	0.607	0.0468	1	0.00888	0.492	0.0108	0.692	0.346	1	0.0069	0.275	0.00292	0.127	neutral lipid metabolism	P
GO:0006639	35	0.00366	0.212	0.0165	0.763	0.036	1	0.0147	0.647	0.0108	0.692	0.305	1	0.0112	0.339	0.00475	0.201	acylglycerol metabolism	P
GO:0006641	30	0.000414	0.031	0.00606	0.308	0.0195	1	0.00744	0.492	0.00153	0.12	0.13	1	0.00292	0.087	0.0035	0.127	triacylglycerol metabolism	P
GO:0006643	207	2.9e-08	0.00257	1.11e-09	0.00089	3.14e-06	0.00291	7.34e-07	0.00289	2.74e-05	0.006	7.15e-05	0.011	7.59e-05	0.008	4.29e-06	0.00291	membrane lipid metabolism	P
GO:0006644	164	5.41e-06	0.00362	6.35e-07	0.00392	7.76e-05	0.0116	3.49e-05	0.00957	0.000531	0.049	0.00281	0.144	0.00166	0.084	0.000125	0.016	phospholipid metabolism	P
GO:0006650	85	0.000142	0.0143	1.81e-05	0.00451	0.00134	0.079	0.000202	0.013	0.00127	0.12	0.00245	0.127	0.0146	0.478	0.00148	0.06	glycerophospholipid metabolism	P
GO:0006662	37	0.00394	0.212	0.013	0.607	0.032	1	0.00996	0.572	0.0132	0.692	0.262	1	0.00905	0.275	0.00477	0.201	glycerol ether metabolism	P
GO:0006664	17	0.0406	1	0.00242	0.171	0.0608	1	0.19	1	0.131	1	0.00157	0.122	0.0357	0.838	0.0308	0.999	glycolipid metabolism	P
GO:0006665	56	1.74e-05	0.007	9.61e-05	0.015	0.000725	0.049	0.00634	0.333	0.00153	0.12	0.000133	0.013	0.000985	0.0362	0.00494	0.201	sphingolipid metabolism	P
GO:0006672	30	8.12e-06	0.00362	2.51e-06	0.00392	0.000241	0.021	0.00357	0.257	0.00126	0.12	8.31e-05	0.011	0.00269	0.084	0.00264	0.0832	ceramide metabolism	P
GO:0006684	10	0.0189	1	0.129	1	0.0759	1	0.333	1	0.0334	1	0.0228	1	0.0562	1	0.527	1	sphingomyelin metabolism	P
GO:0006687	11	0.0223	1	0.00506	0.279	0.0116	0.653	0.0498	1	0.0882	1	0.00714	0.421	0.0706	1	0.0632	1	glycosphingolipid metabolism	P
GO:0006690	34	0.522	1	0.0779	1	0.641	1	0.119	1	0.392	1	0.0954	1	0.479	1	0.158	1	icosanoid metabolism	P
GO:0006691	20	0.616	1	0.38	1	0.831	1	0.514	1	0.295	1	0.202	1	0.625	1	0.746	1	leukotriene metabolism	P
GO:0006692	14	0.393	1	0.0501	1	0.348	1	0.043	1	0.61	1	0.148	1	0.315	1	0.0349	1	prostanoid metabolism	P
GO:0006693	14	0.393	1	0.0501	1	0.348	1	0.043	1	0.61	1	0.148	1	0.315	1	0.0349	1	prostaglandin metabolism	P
GO:0006694	93	0.229	1	0.515	1	0.44	1	0.516	1	0.0991	1	0.386	1	0.319	1	0.435	1	steroid biosynthesis	P
GO:0006695	27	0.033	1	0.0835	1	0.0224	1	0.0826	1	0.12	1	0.0884	1	0.143	1	0.271	1	cholesterol biosynthesis	P
GO:0006700	15	0.93	1	0.999	1	0.989	1	0.999	1	0.734	1	0.979	1	0.792	1	1	1	C21-steroid hormone biosynthesis	P
GO:0006706	10	0.383	1	0.148	1	0.377	1	0.198	1	0.163	1	0.0111	0.503	0.968	1	0.756	1	steroid catabolism	P
GO:0006720	34	0.759	1	0.428	1	0.455	1	0.598	1	0.811	1	0.504	1	0.709	1	0.116	1	isoprenoid metabolism	P
GO:0006725	176	0.132	1	0.0442	1	0.301	1	0.384	1	0.0465	1	0.0533	1	0.575	1	0.0391	1	aromatic compound metabolism	P
GO:0006730	127	0.0296	1	0.00408	0.188	0.0153	0.653	0.00114	0.094	0.0967	1	0.0154	0.668	0.171	1	0.0824	1	one-carbon compound metabolism	P
GO:0006732	185	6.29e-06	0.00362	9.15e-05	0.015	3.35e-05	0.00982	0.00303	0.161	4.44e-05	0.00658	4.05e-05	0.00966	0.0433	1	0.119	1	coenzyme metabolism	P
GO:0006733	35	9.07e-05	0.0143	0.1	1	0.00162	0.095	0.348	1	0.00342	0.213	0.0406	1	0.0166	0.488	0.362	1	oxidoreduction coenzyme metabolism	P
GO:0006739	14	3.45e-07	0.00257	0.0143	0.607	9.57e-05	0.0116	0.0185	0.937	0.00818	0.692	0.0138	0.668	0.00962	0.275	0.581	1	NADP metabolism	P
GO:0006749	26	0.00342	0.212	0.00462	0.261	0.0064	0.469	0.039	1	0.00717	0.692	0.000542	0.032	0.0323	0.838	0.371	1	glutathione metabolism	P
GO:0006752	73	0.0316	1	0.115	1	0.0447	1	0.0739	1	0.0163	0.692	0.273	1	0.455	1	0.322	1	group transfer coenzyme metabolism	P
GO:0006753	44	0.154	1	0.491	1	0.127	1	0.412	1	0.0656	1	0.535	1	0.921	1	0.659	1	nucleoside phosphate metabolism	P
GO:0006754	44	0.154	1	0.491	1	0.127	1	0.412	1	0.0656	1	0.535	1	0.921	1	0.659	1	ATP biosynthesis	P
GO:0006760	16	0.148	1	0.0724	1	0.345	1	0.0823	1	0.206	1	0.126	1	0.137	1	0.554	1	folic acid and derivative metabolism	P
GO:0006766	77	0.0319	1	0.129	1	0.0225	1	0.177	1	0.0642	1	0.25	1	0.504	1	0.187	1	vitamin metabolism	P
GO:0006767	48	0.000115	0.0143	0.0568	1	0.000139	0.0116	0.101	1	0.00382	0.213	0.104	1	0.367	1	0.353	1	water-soluble vitamin metabolism	P
GO:0006769	23	0.000496	0.044	0.101	1	0.0147	0.653	0.361	1	0.0105	0.692	0.0319	1	0.058	1	0.371	1	nicotinamide metabolism	P
GO:0006775	28	0.93	1	0.698	1	0.965	1	0.766	1	0.835	1	0.858	1	0.83	1	0.213	1	fat-soluble vitamin metabolism	P
GO:0006776	22	0.992	1	0.757	1	0.992	1	0.936	1	0.965	1	0.812	1	0.947	1	0.288	1	vitamin A metabolism	P
GO:0006778	26	0.00673	0.315	0.178	1	0.0025	0.107	0.0677	1	0.0326	1	0.361	1	0.224	1	0.463	1	porphyrin metabolism	P
GO:0006779	20	0.0342	1	0.331	1	0.0122	0.653	0.113	1	0.167	1	0.575	1	0.143	1	0.541	1	porphyrin biosynthesis	P
GO:0006783	13	0.0626	1	0.277	1	0.104	1	0.054	1	0.0875	1	0.399	1	0.0906	1	0.404	1	heme biosynthesis	P
GO:0006790	85	0.00496	0.272	0.00206	0.13	0.0609	1	0.0193	0.937	0.0295	1	0.00188	0.127	0.0118	0.339	0.151	1	sulfur metabolism	P
GO:0006793	1022	5.87e-07	0.00276	1.3e-17	0	2.39e-07	0.002	1.53e-12	0	0.000942	0.12	2.72e-10	0.00062	0.00226	0.084	1.1e-11	0	phosphorus metabolism	P
GO:0006796	1022	5.87e-07	0.00276	1.3e-17	0	2.39e-07	0.002	1.53e-12	0	0.000942	0.12	2.72e-10	0.00062	0.00226	0.084	1.1e-11	0	phosphate metabolism	P
GO:0006800	135	0.000143	0.0143	8.93e-05	0.015	0.00311	0.135	0.00095	0.094	0.0128	0.692	0.000213	0.0233	0.000176	0.008	0.0598	1	oxygen and reactive oxygen species metabolism	P
GO:0006801	19	0.334	1	0.161	1	0.31	1	0.0837	1	0.612	1	0.0677	1	0.0903	1	0.965	1	superoxide metabolism	P
GO:0006805	13	0.128	1	0.665	1	0.475	1	0.576	1	0.029	1	0.71	1	0.199	1	0.439	1	xenobiotic metabolism	P
GO:0006807	572	3.15e-05	0.007	6.93e-06	0.00451	0.00239	0.107	0.000501	0.042	0.00147	0.12	1.5e-05	0.00587	0.000132	0.008	0.00694	0.428	nitrogen compound metabolism	P
GO:0006809	22	0.205	1	0.0198	1	0.356	1	0.251	1	0.246	1	0.0279	1	0.164	1	0.0542	1	nitric oxide biosynthesis	P
GO:0006810	3038	1.79e-19	0	2.16e-38	0	6.59e-12	0.000708	1.86e-21	0	1.1e-12	0	1.23e-23	0	3.28e-11	0	5.47e-26	0	transport	P
GO:0006811	968	0.571	1	0.0153	0.763	0.963	1	0.375	1	0.843	1	0.227	1	0.0431	1	5.03e-05	0.007	ion transport	P
GO:0006812	697	0.147	1	0.0028	0.188	0.499	1	0.105	1	0.448	1	0.0187	0.668	0.0359	0.838	0.000905	0.06	cation transport	P
GO:0006813	288	0.448	1	0.185	1	0.824	1	0.505	1	0.788	1	0.153	1	0.0531	1	0.0466	1	potassium ion transport	P
GO:0006814	143	0.656	1	0.223	1	0.623	1	0.19	1	0.484	1	0.383	1	0.77	1	0.514	1	sodium ion transport	P
GO:0006816	165	0.427	1	0.0162	0.763	0.909	1	0.309	1	0.735	1	0.224	1	0.0121	0.339	0.000117	0.016	calcium ion transport	P
GO:0006817	89	0.998	1	0.518	1	1	1	0.939	1	0.999	1	0.812	1	0.519	1	0.036	1	phosphate transport	P
GO:0006818	84	0.128	1	0.106	1	0.233	1	0.162	1	0.208	1	0.162	1	0.262	1	0.164	1	hydrogen transport	P
GO:0006820	216	1	1	0.608	1	1	1	0.898	1	0.998	1	0.979	1	0.909	1	0.0191	0.736	anion transport	P
GO:0006821	74	0.998	1	0.995	1	0.999	1	0.995	1	0.959	1	0.993	1	0.988	1	0.938	1	chloride transport	P
GO:0006825	11	0.071	1	0.185	1	0.153	1	0.155	1	0.112	1	0.192	1	0.0583	1	0.725	1	copper ion transport	P
GO:0006826	38	0.884	1	0.646	1	0.776	1	0.585	1	0.826	1	0.463	1	0.933	1	0.883	1	iron ion transport	P
GO:0006829	22	0.021	1	0.00845	0.469	0.0335	1	0.0523	1	0.228	1	0.121	1	0.132	1	0.00998	0.476	zinc ion transport	P
GO:0006833	11	0.491	1	0.157	1	0.294	1	0.0281	1	0.479	1	0.393	1	0.832	1	0.517	1	water transport	P
GO:0006835	71	0.811	1	0.667	1	0.937	1	0.913	1	0.772	1	0.544	1	0.542	1	0.39	1	dicarboxylic acid transport	P
GO:0006836	66	0.885	1	0.513	1	0.805	1	0.868	1	0.88	1	0.194	1	0.757	1	0.479	1	neurotransmitter transport	P
GO:0006839	49	0.00687	0.315	0.000539	0.0474	0.0375	1	0.0484	1	0.0109	0.692	0.0174	0.668	0.0753	1	0.00193	0.079	mitochondrial transport	P
GO:0006857	10	0.693	1	0.288	1	0.998	1	0.366	1	0.281	1	0.327	1	0.345	1	0.29	1	oligopeptide transport	P
GO:0006865	74	0.0573	1	0.0008	0.081	0.0603	1	0.0235	0.937	0.0443	1	0.00295	0.144	0.357	1	0.000714	0.06	amino acid transport	P
GO:0006869	104	0.00585	0.309	0.00712	0.312	0.0249	1	0.0268	1	0.0148	0.692	0.16	1	0.0421	1	0.0199	0.736	lipid transport	P
GO:0006873	163	0.0423	1	0.0126	0.607	0.433	1	0.0554	1	0.247	1	0.0418	1	0.00586	0.275	0.0332	1	cell ion homeostasis	P
GO:0006874	88	0.108	1	0.0348	1	0.625	1	0.358	1	0.602	1	0.0858	1	0.000999	0.0362	0.00332	0.127	calcium ion homeostasis	P
GO:0006875	145	0.112	1	0.0473	1	0.555	1	0.19	1	0.565	1	0.0869	1	0.00677	0.275	0.0425	1	metal ion homeostasis	P
GO:0006879	35	0.936	1	0.809	1	0.852	1	0.601	1	0.851	1	0.699	1	0.844	1	0.811	1	iron ion homeostasis	P
GO:0006885	37	0.0605	1	0.0783	1	0.104	1	0.072	1	0.0277	1	0.211	1	0.208	1	0.128	1	regulation of pH	P
GO:0006886	525	9.49e-17	0	1.06e-23	0	4.29e-12	0.000708	3.66e-21	0	3.92e-14	0	1.62e-14	0.00062	1.28e-05	0.00363	5.17e-09	0	intracellular protein transport	P
GO:0006887	100	0.00565	0.309	0.00588	0.308	0.0234	1	0.126	1	0.205	1	0.0132	0.668	0.00307	0.0878	0.00667	0.428	exocytosis	P
GO:0006888	27	0.0311	1	0.0171	0.763	0.0424	1	0.00961	0.572	0.1	1	0.0272	1	0.399	1	0.235	1	ER to Golgi vesicle-mediated transport	P
GO:0006891	11	0.034	1	0.0202	1	0.0199	1	0.0158	0.647	0.12	1	0.154	1	0.125	1	0.045	1	intra-Golgi vesicle-mediated transport	P
GO:0006892	15	0.00981	0.608	0.00883	0.469	0.168	1	0.208	1	0.0202	0.79	0.213	1	0.0866	1	0.0148	0.656	post-Golgi vesicle-mediated transport	P
GO:0006897	200	0.00364	0.212	9.15e-08	0.00392	0.0134	0.653	3.6e-05	0.00957	0.337	1	0.000178	0.0233	0.00107	0.0362	1.09e-05	0.007	endocytosis	P
GO:0006898	27	0.115	1	0.00514	0.279	0.143	1	0.028	1	0.871	1	0.135	1	0.0207	0.636	0.0019	0.079	receptor mediated endocytosis	P
GO:0006904	18	0.08	1	0.243	1	0.211	1	0.423	1	0.0858	1	0.188	1	0.212	1	0.331	1	vesicle docking during exocytosis	P
GO:0006909	50	0.491	1	0.0904	1	0.412	1	0.343	1	0.88	1	0.0996	1	0.362	1	0.0819	1	phagocytosis	P
GO:0006910	12	0.845	1	0.424	1	0.547	1	0.846	1	0.991	1	0.596	1	0.829	1	0.142	1	phagocytosis, recognition	P
GO:0006911	13	1	1	0.58	1	0.923	1	0.781	1	0.988	1	0.513	1	1	1	0.383	1	phagocytosis, engulfment	P
GO:0006913	235	3.71e-10	0.00257	4.02e-17	0	2.99e-08	0.00098	3.6e-12	0	2.73e-08	0.000959	1.51e-10	0.00062	0.00278	0.084	2.13e-09	0	nucleocytoplasmic transport	P
GO:0006914	30	0.0262	1	0.00405	0.188	0.0444	1	0.0118	0.647	0.0117	0.692	0.0438	1	0.61	1	0.0219	0.999	autophagy	P
GO:0006915	786	4.55e-12	0.00257	2e-14	0	1.76e-08	0.00098	4.95e-11	0	4.09e-07	0.000959	1.08e-09	0.00062	1.13e-06	0.000823	7.51e-07	0.002	apoptosis	P
GO:0006916	109	0.000627	0.0886	0.018	1	0.0131	0.653	0.0348	1	0.0103	0.692	0.0658	1	0.0107	0.275	0.0309	0.999	anti-apoptosis	P
GO:0006917	189	0.000117	0.0143	1.79e-05	0.00451	0.00179	0.095	0.000173	0.013	0.00451	0.213	7.76e-05	0.011	0.00125	0.0614	0.0103	0.476	induction of apoptosis	P
GO:0006919	37	4.61e-05	0.00952	0.0012	0.0965	0.00115	0.079	0.0187	0.937	0.00118	0.12	0.00358	0.18	0.00742	0.275	0.0109	0.476	caspase activation	P
GO:0006921	13	0.0034	0.212	0.00932	0.469	0.0107	0.653	0.00428	0.288	0.0116	0.692	0.0202	0.756	0.0112	0.339	0.264	1	disassembly of cell structures during apoptosis	P
GO:0006928	448	0.24	1	0.0487	1	0.696	1	0.326	1	0.383	1	0.406	1	0.0699	1	0.000317	0.03	cell motility	P
GO:0006935	173	0.739	1	0.229	1	0.999	1	0.864	1	0.876	1	0.115	1	0.00495	0.223	0.0202	0.736	chemotaxis	P
GO:0006936	76	0.654	1	0.11	1	0.794	1	0.556	1	0.717	1	0.228	1	0.555	1	0.0109	0.476	muscle contraction	P
GO:0006937	30	0.669	1	0.158	1	0.674	1	0.659	1	0.983	1	0.408	1	0.174	1	0.00863	0.428	regulation of muscle contraction	P
GO:0006939	24	0.868	1	0.57	1	0.942	1	0.995	1	0.95	1	0.752	1	0.223	1	0.0505	1	smooth muscle contraction	P
GO:0006940	18	0.981	1	0.774	1	0.995	1	1	1	1	1	0.883	1	0.191	1	0.0819	1	regulation of smooth muscle contraction	P
GO:0006941	28	0.58	1	0.428	1	0.57	1	0.533	1	0.68	1	0.33	1	0.81	1	0.386	1	striated muscle contraction	P
GO:0006944	23	0.168	1	0.232	1	0.2	1	0.104	1	0.0682	1	0.312	1	0.589	1	0.658	1	membrane fusion	P
GO:0006950	1255	2.45e-15	0	3.15e-15	0	1.32e-11	0.000708	1.37e-13	0	1.6e-07	0.000959	4.59e-08	0.000903	1.6e-09	0	1.89e-08	0	response to stress	P
GO:0006952	581	1	1	1	1	1	1	0.999	1	1	1	1	1	0.82	1	0.876	1	defense response	P
GO:0006953	29	0.981	1	0.994	1	0.939	1	0.913	1	0.863	1	0.997	1	0.97	1	0.832	1	acute-phase response	P
GO:0006954	300	0.961	1	0.928	1	0.977	1	0.872	1	1	1	0.996	1	0.168	1	0.169	1	inflammatory response	P
GO:0006955	559	0.491	1	0.424	1	0.71	1	0.685	1	0.954	1	0.453	1	0.00901	0.275	0.148	1	immune response	P
GO:0006956	37	0.469	1	0.922	1	0.647	1	0.612	1	0.921	1	0.997	1	0.222	1	0.594	1	complement activation	P
GO:0006957	10	0.503	1	0.618	1	0.619	1	0.473	1	0.988	1	0.918	1	0.324	1	0.198	1	complement activation, alternative pathway	P
GO:0006958	29	0.511	1	0.893	1	0.654	1	0.613	1	0.874	1	0.997	1	0.269	1	0.508	1	complement activation, classical pathway	P
GO:0006959	57	0.595	1	0.86	1	0.512	1	0.665	1	0.983	1	0.969	1	0.235	1	0.546	1	humoral immune response	P
GO:0006968	13	0.517	1	0.338	1	0.789	1	0.976	1	0.721	1	0.366	1	0.303	1	0.12	1	cellular defense response	P
GO:0006970	16	0.00288	0.212	0.0803	1	0.123	1	0.0516	1	0.163	1	0.163	1	0.024	0.838	0.382	1	response to osmotic stress	P
GO:0006974	308	2.23e-16	0	2.89e-21	0	4.92e-15	0.000708	9.23e-19	0	8.7e-11	0	2.51e-10	0.00062	0.000305	0.0229	6.52e-09	0	response to DNA damage stimulus	P
GO:0006979	101	0.000111	0.0143	0.000141	0.015	0.00206	0.095	0.000971	0.094	0.00428	0.213	0.00134	0.09	0.000814	0.0344	0.0328	1	response to oxidative stress	P
GO:0006984	23	0.00399	0.212	0.000936	0.087	0.0144	0.653	0.000365	0.042	0.00916	0.692	0.0121	0.503	0.0244	0.838	0.0478	1	ER-nuclear signaling pathway	P
GO:0006986	49	0.000692	0.0886	0.00123	0.0965	0.000171	0.0116	2.58e-05	0.00957	0.0773	1	0.00963	0.503	0.0745	1	0.513	1	response to unfolded protein	P
GO:0006996	1203	1.24e-29	0	2.49e-36	0	2.73e-28	0	7.53e-32	0	7.23e-15	0	2.27e-20	0	9.71e-13	0	1.17e-16	0	organelle organization and biogenesis	P
GO:0006997	15	0.0112	0.608	0.00942	0.469	0.000203	0.021	0.000288	0.042	0.214	1	0.621	1	0.0801	1	0.0677	1	nuclear organization and biogenesis	P
GO:0007001	401	1.54e-08	0.00257	1.97e-11	0	1.29e-10	0.000795	2.36e-16	0	0.000548	0.049	2.88e-06	0.0029	0.00166	0.084	0.000886	0.06	chromosome organization and biogenesis (sensu Eukaryota)	P
GO:0007005	55	0.00133	0.0886	7.53e-05	0.015	0.00337	0.203	0.000933	0.094	0.0543	1	0.00173	0.127	0.0158	0.488	0.00523	0.201	mitochondrion organization and biogenesis	P
GO:0007006	26	0.00891	0.608	0.00163	0.0965	0.0193	1	0.0131	0.647	0.0943	1	0.0128	0.668	0.0141	0.478	0.0259	0.999	mitochondrial membrane organization and biogenesis	P
GO:0007007	10	0.314	1	0.237	1	0.457	1	0.194	1	0.283	1	0.851	1	0.237	1	0.244	1	inner mitochondrial membrane organization and biogenesis	P
GO:0007009	11	0.454	1	0.629	1	0.537	1	0.532	1	0.854	1	0.377	1	0.132	1	0.956	1	plasma membrane organization and biogenesis	P
GO:0007010	499	1.29e-11	0.00257	1.1e-15	0	4.83e-09	0.00098	1.38e-08	0.000893	1.94e-05	0.00537	4.23e-10	0.00062	1.71e-08	0	4.65e-11	0	cytoskeleton organization and biogenesis	P
GO:0007015	55	0.0801	1	0.00327	0.188	0.204	1	0.0218	0.937	0.459	1	0.0758	1	0.00476	0.223	0.00036	0.03	actin filament organization	P
GO:0007017	219	2.11e-08	0.00257	2.44e-08	0.000959	8.69e-10	0.000795	3.21e-06	0.00289	0.000179	0.049	1.79e-06	0.002	9.23e-05	0.008	0.00229	0.079	microtubule-based process	P
GO:0007018	119	3.33e-05	0.007	0.000139	0.015	5.34e-06	0.00291	0.00145	0.094	0.00202	0.12	0.00177	0.127	0.00501	0.223	0.00618	0.428	microtubule-based movement	P
GO:0007019	17	0.0046	0.272	0.0128	0.607	0.0122	0.653	0.0361	1	0.0379	1	0.0163	0.668	0.00999	0.275	0.0457	1	microtubule depolymerization	P
GO:0007026	16	0.00491	0.272	0.027	1	0.0137	0.653	0.0615	1	0.0186	0.79	0.0335	1	0.0161	0.488	0.0648	1	negative regulation of microtubule depolymerization	P
GO:0007028	139	1.08e-10	0.00257	3.45e-05	0.007	1.36e-09	0.00098	4.63e-05	0.0107	1.86e-08	0.000959	0.00214	0.127	0.00247	0.084	0.0672	1	cytoplasm organization and biogenesis	P
GO:0007030	12	0.0253	1	0.00258	0.18	0.0786	1	0.0413	1	0.162	1	0.018	0.668	0.2	1	0.00215	0.079	Golgi organization and biogenesis	P
GO:0007031	20	0.00172	0.212	0.0181	1	0.0726	1	0.021	0.937	0.00711	0.692	0.122	1	0.00505	0.223	0.0166	0.656	peroxisome organization and biogenesis	P
GO:0007033	31	0.0173	1	0.141	1	0.0873	1	0.268	1	0.00922	0.692	0.36	1	0.214	1	0.0652	1	vacuole organization and biogenesis	P
GO:0007034	22	0.0268	1	0.00475	0.261	0.255	1	0.0229	0.937	0.00319	0.213	0.13	1	0.415	1	0.00139	0.06	vacuolar transport	P
GO:0007040	27	0.0122	0.608	0.0968	1	0.106	1	0.15	1	0.00454	0.213	0.377	1	0.231	1	0.0479	1	lysosome organization and biogenesis	P
GO:0007041	12	0.217	1	0.206	1	0.65	1	0.565	1	0.0676	1	0.347	1	0.798	1	0.105	1	lysosomal transport	P
GO:0007046	70	1.6e-07	0.00257	0.00118	0.0965	2.02e-07	0.002	0.000829	0.069	7.93e-07	0.00169	0.0157	0.668	0.0851	1	0.227	1	ribosome biogenesis	P
GO:0007049	698	5.82e-23	0	1.18e-31	0	9.65e-23	0	1.61e-30	0	1.43e-12	0	2.3e-18	0	1.79e-08	0	3.14e-09	0	cell cycle	P
GO:0007050	63	0.0848	1	0.00902	0.469	0.0631	1	0.0395	1	0.196	1	0.00573	0.421	0.258	1	0.0895	1	cell cycle arrest	P
GO:0007051	18	0.00497	0.272	8.17e-05	0.015	0.0104	0.653	0.00159	0.096	0.0102	0.692	0.000425	0.0233	0.0209	0.636	0.0557	1	spindle organization and biogenesis	P
GO:0007059	57	0.00064	0.0886	3.06e-06	0.00392	1.12e-05	0.00291	2.3e-07	0.00289	0.0998	1	0.000695	0.0448	0.151	1	0.00224	0.079	chromosome segregation	P
GO:0007067	192	8.88e-16	0	1.2e-16	0	5.65e-16	0	3.63e-17	0	1.66e-09	0	2.44e-09	0.000878	3.75e-05	0.004	6.47e-05	0.007	mitosis	P
GO:0007076	16	0.0421	1	7.97e-07	0.00392	0.0129	0.653	1.95e-09	0	0.268	1	0.0205	0.756	0.114	1	0.0152	0.656	mitotic chromosome condensation	P
GO:0007088	45	3.51e-05	0.007	4.87e-05	0.007	0.000376	0.04	1.18e-05	0.00289	0.000689	0.12	0.000749	0.0448	0.000729	0.0344	0.0634	1	regulation of mitosis	P
GO:0007090	11	0.0986	1	0.0541	1	0.0266	1	0.191	1	0.42	1	0.0329	1	0.444	1	0.414	1	regulation of S phase of mitotic cell cycle	P
GO:0007093	13	0.00268	0.212	1.43e-06	0.00392	0.00942	0.653	4.99e-10	0	0.00153	0.12	0.0236	1	0.0332	0.838	0.0564	1	mitotic checkpoint	P
GO:0007098	12	0.00717	0.315	2.2e-05	0.007	0.00858	0.653	0.000154	0.013	0.0384	1	0.00177	0.127	0.371	1	0.119	1	centrosome cycle	P
GO:0007126	84	0.000246	0.019	1.13e-06	0.00392	2.9e-05	0.003	2.88e-05	0.00957	0.0483	1	8.08e-05	0.011	0.0295	0.838	0.0424	1	meiosis	P
GO:0007127	29	0.00377	0.212	0.000895	0.087	0.000467	0.049	0.0186	0.937	0.0315	1	0.00054	0.032	0.113	1	0.202	1	meiosis I	P
GO:0007129	11	0.0413	1	0.000719	0.059	0.058	1	0.0962	1	0.0542	1	2.35e-06	0.002	0.223	1	0.0264	0.999	synapsis	P
GO:0007143	11	0.0374	1	0.224	1	0.0572	1	0.755	1	0.308	1	0.383	1	0.0932	1	0.118	1	female meiosis	P
GO:0007154	4681	1	1	1	1	1	1	1	1	1	1	1	1	1	1	1	1	cell communication	P
GO:0007155	721	0.972	1	0.173	1	0.986	1	0.487	1	0.98	1	0.385	1	0.658	1	0.0253	0.999	cell adhesion	P
GO:0007156	105	1	1	1	1	1	1	1	1	1	1	1	1	1	1	0.996	1	homophilic cell adhesion	P
GO:0007157	36	0.22	1	0.0491	1	0.378	1	0.086	1	0.344	1	0.0256	1	0.0883	1	0.397	1	heterophilic cell adhesion	P
GO:0007159	18	0.162	1	0.0163	0.763	0.28	1	0.178	1	0.185	1	0.00369	0.18	0.128	1	0.0884	1	leukocyte adhesion	P
GO:0007160	87	0.0907	1	0.0683	1	0.171	1	0.519	1	0.271	1	0.07	1	0.0296	0.838	0.0159	0.656	cell-matrix adhesion	P
GO:0007162	16	0.168	1	0.24	1	0.316	1	0.364	1	0.0888	1	0.161	1	0.102	1	0.314	1	negative regulation of cell adhesion	P
GO:0007163	26	0.1	1	0.00433	0.188	0.0754	1	0.0149	0.647	0.264	1	0.0221	1	0.171	1	0.0404	1	establishment and/or maintenance of cell polarity	P
GO:0007165	4360	1	1	1	1	1	1	1	1	1	1	1	1	1	1	1	1	signal transduction	P
GO:0007166	2996	1	1	1	1	1	1	1	1	1	1	1	1	1	1	1	1	cell surface receptor linked signal transduction	P
GO:0007167	306	0.0173	1	0.0365	1	0.281	1	0.397	1	0.0517	1	0.527	1	0.00483	0.223	5.56e-05	0.007	enzyme linked receptor protein signaling pathway	P
GO:0007169	195	0.117	1	0.102	1	0.497	1	0.392	1	0.182	1	0.552	1	0.0486	1	0.00225	0.079	transmembrane receptor protein tyrosine kinase signaling pathway	P
GO:0007172	13	0.492	1	0.176	1	0.776	1	0.243	1	0.634	1	0.524	1	0.231	1	0.15	1	signal complex formation	P
GO:0007173	20	0.56	1	0.541	1	0.683	1	0.57	1	0.661	1	0.645	1	0.438	1	0.478	1	epidermal growth factor receptor signaling pathway	P
GO:0007178	107	0.0374	1	0.124	1	0.197	1	0.465	1	0.0609	1	0.448	1	0.0534	1	0.00715	0.428	transmembrane receptor protein serine/threonine kinase signaling pathway	P
GO:0007179	65	0.0248	1	0.106	1	0.116	1	0.205	1	0.035	1	0.585	1	0.0869	1	0.0227	0.999	transforming growth factor beta receptor signaling pathway	P
GO:0007186	2337	1	1	1	1	1	1	1	1	1	1	1	1	1	1	1	1	G-protein coupled receptor protein signaling pathway	P
GO:0007187	66	0.743	1	0.583	1	0.915	1	0.872	1	0.613	1	0.578	1	0.331	1	0.142	1	G-protein signaling, coupled to cyclic nucleotide second messenger	P
GO:0007188	62	0.747	1	0.616	1	0.912	1	0.864	1	0.635	1	0.609	1	0.328	1	0.161	1	G-protein signaling, coupled to cAMP nucleotide second messenger	P
GO:0007189	39	0.958	1	0.854	1	0.982	1	0.998	1	0.903	1	0.808	1	0.647	1	0.172	1	G-protein signaling, adenylate cyclase activating pathway	P
GO:0007190	15	0.977	1	0.567	1	0.992	1	0.893	1	0.726	1	0.762	1	0.924	1	0.105	1	adenylate cyclase activation	P
GO:0007193	15	0.077	1	0.222	1	0.271	1	0.0879	1	0.32	1	0.245	1	0.0632	1	0.307	1	G-protein signaling, adenylate cyclase inhibiting pathway	P
GO:0007200	45	0.43	1	0.632	1	0.788	1	0.835	1	0.559	1	0.875	1	0.106	1	0.113	1	G-protein signaling, coupled to IP3 second messenger (phospholipase C activating)	P
GO:0007204	38	0.201	1	0.0929	1	0.675	1	0.375	1	0.742	1	0.134	1	0.00268	0.084	0.0273	0.999	elevation of cytosolic calcium ion concentration	P
GO:0007205	21	0.162	1	0.47	1	0.254	1	0.459	1	0.442	1	0.812	1	0.0669	1	0.277	1	protein kinase C activation	P
GO:0007212	16	0.987	1	0.707	1	0.939	1	0.915	1	0.902	1	0.397	1	0.915	1	0.362	1	dopamine receptor signaling pathway	P
GO:0007214	31	1	1	0.998	1	1	1	0.997	1	0.979	1	0.954	1	0.996	1	0.888	1	gamma-aminobutyric acid signaling pathway	P
GO:0007215	13	0.449	1	0.0554	1	0.288	1	0.226	1	0.672	1	0.0149	0.668	0.633	1	0.428	1	glutamate signaling pathway	P
GO:0007218	99	0.383	1	0.222	1	0.627	1	0.4	1	0.306	1	0.498	1	0.262	1	0.0282	0.999	neuropeptide signaling pathway	P
GO:0007219	57	0.517	1	0.274	1	0.723	1	0.119	1	0.718	1	0.436	1	0.258	1	0.661	1	Notch signaling pathway	P
GO:0007223	20	0.0605	1	0.417	1	0.678	1	0.804	1	0.00211	0.12	0.208	1	0.161	1	0.41	1	frizzled-2 signaling pathway	P
GO:0007224	29	0.0619	1	0.0903	1	0.304	1	0.471	1	0.025	1	0.0341	1	0.131	1	0.22	1	smoothened signaling pathway	P
GO:0007229	96	0.623	1	0.304	1	0.759	1	0.567	1	0.495	1	0.572	1	0.535	1	0.0827	1	integrin-mediated signaling pathway	P
GO:0007242	1232	1.3e-13	0	3.22e-25	0	4.89e-11	0.000708	2.57e-15	0	7.15e-08	0.000959	2.47e-14	0.00062	6.32e-07	0.000823	8.75e-19	0	intracellular signaling cascade	P
GO:0007243	358	1.17e-05	0.007	1.05e-12	0	0.000355	0.04	1.4e-07	0.00289	0.0138	0.692	1.42e-07	0.00165	4.36e-05	0.008	1.82e-09	0	protein kinase cascade	P
GO:0007249	104	0.00733	0.315	4.96e-05	0.007	0.0697	1	0.00124	0.094	0.244	1	0.0116	0.503	0.00115	0.0614	0.00198	0.079	I-kappaB kinase/NF-kappaB cascade	P
GO:0007254	50	0.353	1	0.475	1	0.575	1	0.629	1	0.334	1	0.64	1	0.349	1	0.208	1	JNK cascade	P
GO:0007257	12	0.203	1	0.74	1	0.534	1	0.959	1	0.239	1	0.721	1	0.0405	1	0.364	1	activation of JNK activity	P
GO:0007259	42	0.267	1	0.0678	1	0.213	1	0.161	1	0.615	1	0.0897	1	0.0936	1	0.15	1	JAK-STAT cascade	P
GO:0007260	19	0.983	1	0.232	1	0.983	1	0.631	1	1	1	0.329	1	0.331	1	0.0863	1	tyrosine phosphorylation of STAT protein	P
GO:0007264	427	7.69e-06	0.00362	1.6e-10	0	0.000195	0.021	5.03e-07	0.00289	0.000134	0.027	6.69e-08	0.00165	0.0148	0.478	5.18e-06	0.00291	small GTPase mediated signal transduction	P
GO:0007265	35	0.269	1	0.0101	0.469	0.238	1	0.0196	0.937	0.681	1	0.0314	1	0.365	1	0.0456	1	Ras protein signal transduction	P
GO:0007266	97	0.0997	1	0.000334	0.044	0.145	1	0.0156	0.647	0.718	1	0.00236	0.127	0.0478	1	0.000595	0.03	Rho protein signal transduction	P
GO:0007267	406	0.516	1	0.283	1	0.964	1	0.842	1	0.591	1	0.145	1	0.0224	0.636	0.0115	0.476	cell-cell signaling	P
GO:0007268	241	0.924	1	0.694	1	0.998	1	0.983	1	0.889	1	0.184	1	0.256	1	0.264	1	synaptic transmission	P
GO:0007269	70	1	1	0.958	1	1	1	1	1	1	1	0.621	1	0.985	1	0.682	1	neurotransmitter secretion	P
GO:0007270	51	0.997	1	0.881	1	0.998	1	0.995	1	1	1	0.485	1	0.612	1	0.701	1	nerve-nerve synaptic transmission	P
GO:0007271	12	1	1	0.984	1	1	1	1	1	1	1	0.995	1	0.676	1	0.283	1	synaptic transmission, cholinergic	P
GO:0007272	42	0.52	1	0.135	1	0.336	1	0.18	1	0.577	1	0.339	1	0.575	1	0.0751	1	ensheathment of neurons	P
GO:0007274	14	0.0177	1	0.241	1	0.672	1	0.313	1	0.22	1	0.121	1	0.00223	0.084	0.43	1	neuromuscular synaptic transmission	P
GO:0007275	2714	2.32e-14	0	9.1e-13	0	1.03e-07	0.002	8.16e-08	0.00289	6.26e-07	0.00169	7.61e-06	0.00587	5.84e-13	0	2.23e-12	0	development	P
GO:0007276	312	0.000238	0.019	0.00315	0.188	0.000178	0.0116	0.0095	0.572	0.0142	0.692	0.00908	0.503	0.0104	0.275	0.147	1	gametogenesis	P
GO:0007281	42	0.0722	1	0.034	1	0.024	1	0.118	1	0.334	1	0.021	0.756	0.18	1	0.422	1	germ cell development	P
GO:0007283	233	4.7e-07	0.00257	1.41e-05	0.00451	4.04e-07	0.002	8.35e-05	0.013	0.000949	0.12	0.00163	0.122	0.00144	0.0614	0.0069	0.428	spermatogenesis	P
GO:0007286	44	0.0152	1	0.00595	0.308	0.0039	0.22	0.011	0.572	0.328	1	0.0326	1	0.00991	0.275	0.0356	1	spermatid development	P
GO:0007292	43	0.0198	1	0.419	1	0.0709	1	0.41	1	0.114	1	0.392	1	0.0296	0.838	0.796	1	female gamete generation	P
GO:0007338	48	0.232	1	0.151	1	0.307	1	0.156	1	0.476	1	0.278	1	0.0815	1	0.124	1	fertilization (sensu Metazoa)	P
GO:0007339	21	0.678	1	0.207	1	0.766	1	0.127	1	0.867	1	0.317	1	0.365	1	0.342	1	binding of sperm to zona pellucida	P
GO:0007340	11	0.253	1	0.501	1	0.409	1	0.711	1	0.359	1	0.381	1	0.0415	1	0.51	1	acrosome reaction	P
GO:0007346	38	0.111	1	0.146	1	0.051	1	0.635	1	0.336	1	0.0276	1	0.251	1	0.427	1	regulation of progression through mitotic cell cycle	P
GO:0007368	34	0.392	1	0.693	1	0.258	1	0.566	1	0.196	1	0.832	1	0.951	1	0.682	1	determination of left/right symmetry	P
GO:0007369	69	0.00846	0.608	0.00202	0.13	0.00338	0.203	0.00436	0.288	0.0294	1	0.0174	0.668	0.335	1	0.0307	0.999	gastrulation	P
GO:0007379	10	0.967	1	1	1	0.795	1	0.969	1	0.999	1	0.962	1	0.822	1	1	1	segment specification	P
GO:0007389	244	0.884	1	1	1	0.928	1	0.999	1	0.758	1	0.999	1	0.732	1	0.975	1	pattern specification	P
GO:0007398	142	0.441	1	0.587	1	0.716	1	0.717	1	0.678	1	0.499	1	0.0792	1	0.341	1	ectoderm development	P
GO:0007399	753	0.0803	1	0.214	1	0.625	1	0.706	1	0.3	1	0.504	1	0.000956	0.0362	0.00767	0.428	nervous system development	P
GO:0007405	27	0.0483	1	0.114	1	0.515	1	0.117	1	0.0419	1	0.353	1	0.00649	0.275	0.0488	1	neuroblast proliferation	P
GO:0007409	179	0.625	1	0.758	1	0.904	1	0.937	1	0.433	1	0.764	1	0.35	1	0.222	1	axonogenesis	P
GO:0007411	93	0.965	1	0.941	1	0.998	1	0.996	1	0.876	1	0.869	1	0.582	1	0.417	1	axon guidance	P
GO:0007416	21	0.978	1	0.742	1	1	1	0.967	1	0.999	1	0.96	1	0.527	1	0.0804	1	synaptogenesis	P
GO:0007417	328	0.309	1	0.851	1	0.577	1	0.919	1	0.593	1	0.614	1	0.0304	0.838	0.831	1	central nervous system development	P
GO:0007420	255	0.302	1	0.755	1	0.568	1	0.846	1	0.514	1	0.491	1	0.0596	1	0.787	1	brain development	P
GO:0007422	29	0.752	1	0.872	1	0.822	1	0.669	1	0.706	1	0.788	1	0.503	1	0.993	1	peripheral nervous system development	P
GO:0007423	175	0.587	1	0.972	1	0.669	1	0.915	1	0.638	1	0.913	1	0.343	1	0.96	1	sensory organ development	P
GO:0007431	12	0.994	1	0.784	1	0.922	1	0.927	1	1	1	0.758	1	0.75	1	0.274	1	salivary gland development	P
GO:0007439	10	0.183	1	0.0411	1	0.541	1	0.105	1	0.352	1	0.143	1	0.074	1	0.00278	0.127	ectodermal gut development	P
GO:0007492	21	0.899	1	0.616	1	0.733	1	0.675	1	0.727	1	0.658	1	0.972	1	0.35	1	endoderm development	P
GO:0007498	57	0.0198	1	0.00798	0.416	0.00379	0.22	0.0591	1	0.235	1	0.0178	0.668	0.0963	1	0.0614	1	mesoderm development	P
GO:0007507	166	0.00479	0.272	0.00199	0.13	0.00748	0.641	0.00467	0.288	0.1	1	0.0917	1	0.00817	0.275	0.00282	0.127	heart development	P
GO:0007512	13	0.807	1	0.915	1	0.454	1	0.887	1	0.665	1	0.929	1	0.983	1	0.383	1	adult heart development	P
GO:0007517	211	0.225	1	0.0946	1	0.775	1	0.134	1	0.777	1	0.453	1	0.00174	0.084	0.0266	0.999	muscle development	P
GO:0007519	152	0.281	1	0.0715	1	0.656	1	0.0514	1	0.692	1	0.419	1	0.0276	0.838	0.0555	1	striated muscle development	P
GO:0007528	23	0.454	1	0.0939	1	0.831	1	0.195	1	0.332	1	0.289	1	0.199	1	0.0451	1	neuromuscular junction development	P
GO:0007530	23	0.974	1	0.688	1	0.935	1	0.857	1	0.971	1	0.627	1	0.805	1	0.339	1	sex determination	P
GO:0007548	100	0.146	1	0.605	1	0.113	1	0.64	1	0.289	1	0.556	1	0.209	1	0.571	1	sex differentiation	P
GO:0007565	47	0.768	1	0.936	1	0.946	1	0.983	1	0.337	1	0.985	1	0.616	1	0.502	1	pregnancy	P
GO:0007566	15	0.00472	0.272	0.0531	1	0.152	1	0.0208	0.937	0.00376	0.213	0.346	1	0.034	0.838	0.0737	1	embryo implantation	P
GO:0007568	53	0.224	1	0.368	1	0.318	1	0.252	1	0.438	1	0.216	1	0.192	1	0.94	1	aging	P
GO:0007569	28	0.299	1	0.302	1	0.443	1	0.256	1	0.622	1	0.356	1	0.292	1	0.662	1	cell aging	P
GO:0007582	12555	0	0	0	0	0	0	0	0	0	0	0	0	1.85e-35	0	0	0	physiological process	P
GO:0007584	43	8.63e-05	0.0143	0.000261	0.044	4.53e-06	0.00291	5.33e-05	0.0107	0.0344	1	0.000798	0.0448	0.0944	1	0.383	1	response to nutrient	P
GO:0007585	30	0.407	1	0.779	1	0.446	1	0.921	1	0.628	1	0.731	1	0.239	1	0.347	1	respiratory gaseous exchange	P
GO:0007586	34	0.0191	1	0.23	1	0.0951	1	0.711	1	0.0437	1	0.189	1	0.0103	0.275	0.0742	1	digestion	P
GO:0007588	17	0.395	1	0.991	1	0.723	1	0.946	1	0.697	1	0.945	1	0.259	1	0.982	1	excretion	P
GO:0007595	25	0.953	1	0.812	1	0.86	1	0.969	1	1	1	0.777	1	0.492	1	0.363	1	lactation	P
GO:0007596	120	0.769	1	0.583	1	0.81	1	0.814	1	0.887	1	0.351	1	0.521	1	0.589	1	blood coagulation	P
GO:0007599	122	0.674	1	0.446	1	0.779	1	0.582	1	0.839	1	0.299	1	0.375	1	0.577	1	hemostasis	P
GO:0007600	400	1	1	1	1	1	1	1	1	1	1	1	1	0.999	1	1	1	sensory perception	P
GO:0007601	122	0.73	1	0.718	1	0.527	1	0.72	1	0.935	1	0.517	1	0.549	1	0.881	1	visual perception	P
GO:0007602	23	0.627	1	0.634	1	0.467	1	0.848	1	0.816	1	0.259	1	0.486	1	0.968	1	phototransduction	P
GO:0007605	76	0.255	1	0.0461	1	0.706	1	0.0861	1	0.53	1	0.167	1	0.00684	0.275	0.0114	0.476	sensory perception of sound	P
GO:0007606	175	1	1	1	1	1	1	1	1	1	1	1	1	1	1	1	1	sensory perception of chemical stimulus	P
GO:0007608	99	1	1	1	1	1	1	1	1	1	1	1	1	1	1	1	1	sensory perception of smell	P
GO:0007610	428	0.679	1	0.268	1	0.999	1	0.963	1	0.843	1	0.138	1	0.00179	0.084	0.00585	0.428	behavior	P
GO:0007611	83	0.541	1	0.282	1	0.572	1	0.439	1	0.683	1	0.524	1	0.412	1	0.0536	1	learning and/or memory	P
GO:0007612	54	0.83	1	0.753	1	0.914	1	0.878	1	0.822	1	0.711	1	0.526	1	0.195	1	learning	P
GO:0007613	25	0.341	1	0.187	1	0.71	1	0.258	1	0.497	1	0.274	1	0.13	1	0.313	1	memory	P
GO:0007617	15	0.975	1	1	1	0.998	1	1	1	0.633	1	0.883	1	0.993	1	0.845	1	mating behavior	P
GO:0007623	35	0.191	1	0.211	1	0.352	1	0.321	1	0.175	1	0.535	1	0.246	1	0.19	1	circadian rhythm	P
GO:0007626	284	0.774	1	0.418	1	1	1	0.954	1	0.939	1	0.282	1	0.00203	0.084	0.015	0.656	locomotory behavior	P
GO:0007628	24	0.349	1	0.814	1	0.568	1	0.957	1	0.675	1	0.734	1	0.0967	1	0.5	1	adult walking behavior	P
GO:0007631	47	0.295	1	0.784	1	0.79	1	0.98	1	0.287	1	0.579	1	0.0272	0.838	0.476	1	feeding behavior	P
GO:0007632	27	0.979	1	0.551	1	0.972	1	0.636	1	1	1	0.753	1	0.19	1	0.13	1	visual behavior	P
GO:0008009	50	0.399	1	0.893	1	0.347	1	0.989	1	0.618	1	0.764	1	0.141	1	0.287	1	chemokine activity	F
GO:0008013	16	0.000357	0.031	0.00148	0.0965	0.000143	0.0116	0.00482	0.288	0.0104	0.692	0.00895	0.503	0.00888	0.275	0.0598	1	beta-catenin binding	F
GO:0008015	135	0.844	1	0.963	1	0.896	1	0.965	1	0.977	1	0.997	1	0.24	1	0.301	1	circulation	P
GO:0008016	45	0.809	1	0.865	1	0.968	1	0.932	1	0.873	1	0.961	1	0.325	1	0.148	1	regulation of heart contraction	P
GO:0008017	58	2.62e-05	0.007	0.000138	0.015	0.000786	0.049	0.00251	0.139	0.00031	0.049	0.00112	0.09	0.00422	0.223	0.00375	0.127	microtubule binding	F
GO:0008021	72	0.335	1	0.0782	1	0.435	1	0.26	1	0.539	1	0.0748	1	0.165	1	0.102	1	synaptic vesicle	C
GO:0008022	69	5.86e-07	0.00276	7.6e-05	0.015	1.46e-05	0.003	0.000299	0.042	0.00143	0.12	0.000996	0.09	0.000212	0.012	0.00821	0.428	protein C-terminus binding	F
GO:0008026	102	4.51e-05	0.00952	1.1e-05	0.00451	5.15e-05	0.00982	7.48e-06	0.00289	0.00342	0.213	0.000329	0.0233	0.186	1	0.0498	1	ATP-dependent helicase activity	F
GO:0008028	17	0.534	1	0.168	1	0.239	1	0.168	1	0.635	1	0.51	1	0.934	1	0.14	1	monocarboxylic acid transporter activity	F
GO:0008033	59	0.00602	0.309	0.0119	0.607	0.0249	1	0.0244	1	0.0857	1	0.0904	1	0.00817	0.275	0.0805	1	tRNA processing	P
GO:0008034	23	0.141	1	0.177	1	0.196	1	0.203	1	0.203	1	0.872	1	0.208	1	0.0471	1	lipoprotein binding	F
GO:0008037	18	0.979	1	0.575	1	0.999	1	0.856	1	0.566	1	0.442	1	0.773	1	0.456	1	cell recognition	P
GO:0008038	12	0.813	1	0.628	1	0.965	1	0.814	1	0.436	1	0.493	1	0.543	1	0.519	1	neuron recognition	P
GO:0008045	13	0.74	1	1	1	0.947	1	0.988	1	0.988	1	1	1	0.201	1	0.912	1	motor axon guidance	P
GO:0008047	270	0.000282	0.019	6.44e-09	0.00089	0.00401	0.22	3.03e-06	0.00289	0.0263	1	1.49e-08	0.000878	0.00314	0.0878	0.00262	0.0832	enzyme activator activity	F
GO:0008060	23	0.0486	1	0.00515	0.279	0.055	1	0.0568	1	0.155	1	0.00253	0.127	0.0458	1	0.185	1	ARF GTPase activator activity	F
GO:0008064	53	0.00615	0.309	0.000545	0.0474	0.0783	1	0.0125	0.647	0.1	1	0.0206	0.756	0.00754	0.275	0.000235	0.0233	regulation of actin polymerization and/or depolymerization	P
GO:0008066	74	1	1	1	1	0.997	1	1	1	0.999	1	0.999	1	1	1	1	1	glutamate receptor activity	F
GO:0008067	56	1	1	1	1	0.982	1	0.999	1	0.998	1	0.975	1	1	1	1	1	metabotropic glutamate, GABA-B-like receptor activity	F
GO:0008076	143	0.432	1	0.222	1	0.481	1	0.653	1	0.866	1	0.159	1	0.101	1	0.0362	1	voltage-gated potassium channel complex	C
GO:0008080	55	0.00412	0.214	0.00118	0.0965	0.00328	0.203	0.00184	0.124	0.0108	0.692	0.00797	0.421	0.352	1	0.0178	0.656	N-acetyltransferase activity	F
GO:0008081	75	0.171	1	0.0613	1	0.241	1	0.358	1	0.0994	1	0.33	1	0.515	1	0.0196	0.736	phosphoric diester hydrolase activity	F
GO:0008083	166	0.848	1	0.491	1	0.782	1	0.611	1	0.977	1	0.855	1	0.685	1	0.129	1	growth factor activity	F
GO:0008088	11	0.0202	1	0.00588	0.308	0.00241	0.107	0.0215	0.937	0.176	1	0.0138	0.668	0.0873	1	0.112	1	axon cargo transport	P
GO:0008092	441	9.03e-12	0.00257	9.53e-19	0	2.79e-05	0.003	4.08e-09	0.000893	5.2e-06	0.00169	6.33e-10	0.00062	1.27e-11	0	1.32e-15	0	cytoskeletal protein binding	F
GO:0008094	33	5.09e-05	0.00952	6.27e-07	0.00392	7.66e-05	0.0116	0.000111	0.013	0.000178	0.049	4.44e-06	0.0029	0.0409	1	0.0131	0.476	DNA-dependent ATPase activity	F
GO:0008104	962	1.72e-25	0	7.49e-36	0	1.82e-18	0	7.74e-29	0	1.54e-22	0	5.4e-24	0	5.78e-08	0	1.01e-12	0	protein localization	P
GO:0008105	10	0.948	1	0.0539	1	0.804	1	0.0278	1	0.593	1	0.455	1	1	1	0.208	1	asymmetric protein localization	P
GO:0008121	13	0.0588	1	0.181	1	0.34	1	0.197	1	0.124	1	0.269	1	0.025	0.838	0.237	1	ubiquinol-cytochrome-c reductase activity	F
GO:0008134	304	9.23e-17	0	7.65e-21	0	9.99e-15	0.000708	1.08e-15	0	3.16e-08	0.000959	1.83e-11	0.00062	2.91e-07	0.000823	3.21e-10	0	transcription factor binding	F
GO:0008135	139	3.34e-07	0.00257	9.75e-12	0	3.28e-10	0.000795	1.41e-08	0.000893	5.26e-05	0.024	4.08e-10	0.00062	0.0472	1	0.000181	0.016	translation factor activity, nucleic acid binding	F
GO:0008137	41	0.114	1	0.433	1	0.197	1	0.67	1	0.134	1	0.21	1	0.327	1	0.535	1	NADH dehydrogenase (ubiquinone) activity	F
GO:0008138	47	0.127	1	0.022	1	0.131	1	0.0979	1	0.454	1	0.0293	1	0.0534	1	0.0658	1	protein tyrosine/serine/threonine phosphatase activity	F
GO:0008144	15	0.173	1	0.277	1	0.666	1	0.196	1	0.137	1	0.997	1	0.0766	1	0.052	1	drug binding	F
GO:0008146	55	1	1	0.868	1	1	1	0.792	1	0.988	1	0.862	1	1	1	0.763	1	sulfotransferase activity	F
GO:0008150	15727	5.35e-38	0	0	0	1.25e-37	0	0	0	9.76e-31	0	0	0	3.62e-06	0.001	1.3e-36	0	biological_process	P
GO:0008152	8672	0	0	0	0	0	0	0	0	0	0	0	0	1.04e-25	0	0	0	metabolism	P
GO:0008154	70	0.00778	0.608	0.000145	0.015	0.128	1	0.00511	0.288	0.112	1	0.0554	1	0.00344	0.223	1.69e-05	0.007	actin polymerization and/or depolymerization	P
GO:0008156	12	0.00129	0.0886	0.000214	0.024	0.0136	0.653	0.00723	0.492	0.0142	0.692	0.000193	0.0233	0.137	1	0.42	1	negative regulation of DNA replication	P
GO:0008168	198	2.99e-05	0.007	5.86e-05	0.007	1.85e-05	0.003	3.43e-05	0.00957	0.000699	0.12	0.000137	0.013	0.0562	1	0.172	1	methyltransferase activity	F
GO:0008170	60	0.0628	1	0.0216	1	0.0124	0.653	0.00725	0.492	0.177	1	0.0204	0.756	0.553	1	0.513	1	N-methyltransferase activity	F
GO:0008172	11	0.542	1	0.708	1	0.234	1	0.82	1	0.774	1	0.705	1	0.631	1	0.691	1	S-methyltransferase activity	F
GO:0008173	20	0.013	0.608	0.343	1	0.0183	1	0.389	1	0.0413	1	0.291	1	0.0487	1	0.903	1	RNA methyltransferase activity	F
GO:0008180	10	0.0157	1	0.0355	1	0.00956	0.653	0.0794	1	0.0291	1	0.0816	1	0.363	1	0.0358	1	signalosome complex	C
GO:0008188	143	0.776	1	0.926	1	0.999	1	0.989	1	0.647	1	0.897	1	0.0983	1	0.287	1	neuropeptide receptor activity	F
GO:0008194	99	0.393	1	0.461	1	0.262	1	0.715	1	0.239	1	0.283	1	0.717	1	0.353	1	UDP-glycosyltransferase activity	F
GO:0008199	23	1	1	0.914	1	0.972	1	0.911	1	0.999	1	0.624	1	0.985	1	0.922	1	ferric iron binding	F
GO:0008201	67	0.837	1	0.697	1	0.743	1	0.899	1	0.829	1	0.749	1	0.817	1	0.251	1	heparin binding	F
GO:0008202	176	0.0519	1	0.0295	1	0.255	1	0.125	1	0.0614	1	0.1	1	0.037	0.838	0.00697	0.428	steroid metabolism	P
GO:0008203	74	0.00275	0.212	0.00345	0.188	0.0161	1	0.0129	0.647	0.0148	0.692	0.0513	1	0.00679	0.275	0.00253	0.079	cholesterol metabolism	P
GO:0008206	14	0.363	1	0.45	1	0.498	1	0.618	1	0.337	1	0.488	1	0.312	1	0.398	1	bile acid metabolism	P
GO:0008207	20	0.99	1	1	1	1	1	0.999	1	0.913	1	0.997	1	0.894	1	0.998	1	C21-steroid hormone metabolism	P
GO:0008211	11	0.424	1	0.822	1	0.57	1	0.721	1	0.45	1	0.759	1	0.478	1	0.867	1	glucocorticoid metabolism	P
GO:0008213	36	3.25e-05	0.007	9.32e-08	0.00392	7.06e-05	0.0107	6.69e-07	0.00289	0.00222	0.12	3.81e-05	0.00966	0.0128	0.478	0.000706	0.06	protein amino acid alkylation	P
GO:0008216	10	0.0255	1	0.0838	1	0.0659	1	0.0678	1	0.038	1	0.251	1	0.0872	1	0.0863	1	spermidine metabolism	P
GO:0008217	63	0.796	1	0.997	1	0.815	1	0.997	1	0.96	1	0.997	1	0.249	1	0.821	1	blood pressure regulation	P
GO:0008219	821	1.04e-11	0.00257	1.12e-13	0	7.95e-08	0.00098	2.18e-10	0	4.57e-07	0.000959	5.37e-09	0.000878	9.55e-07	0.000823	5.28e-07	0.00192	cell death	P
GO:0008227	147	0.0472	1	0.00304	0.188	0.0999	1	0.00884	0.492	0.113	1	0.0231	1	0.0408	1	0.0026	0.0832	amine receptor activity	F
GO:0008233	785	0.182	1	0.0223	1	0.171	1	0.0717	1	0.396	1	0.133	1	0.193	1	0.00177	0.079	peptidase activity	F
GO:0008234	182	0.054	1	0.00215	0.171	0.0201	1	0.000646	0.042	0.133	1	0.117	1	0.426	1	0.00235	0.079	cysteine-type peptidase activity	F
GO:0008235	61	0.331	1	0.125	1	0.092	1	0.195	1	0.839	1	0.119	1	0.202	1	0.179	1	metalloexopeptidase activity	F
GO:0008236	258	0.694	1	0.41	1	0.831	1	0.571	1	0.76	1	0.437	1	0.439	1	0.088	1	serine-type peptidase activity	F
GO:0008237	224	0.468	1	0.596	1	0.482	1	0.702	1	0.834	1	0.555	1	0.087	1	0.314	1	metallopeptidase activity	F
GO:0008238	106	0.242	1	0.208	1	0.0148	0.653	0.364	1	0.814	1	0.151	1	0.288	1	0.262	1	exopeptidase activity	F
GO:0008239	12	0.215	1	0.255	1	0.21	1	0.191	1	0.528	1	0.243	1	0.112	1	0.424	1	dipeptidyl-peptidase activity	F
GO:0008252	10	0.00989	0.608	0.0241	1	0.0278	1	0.0662	1	0.0333	1	0.00867	0.503	0.397	1	0.323	1	nucleotidase activity	F
GO:0008270	2212	2.39e-25	0	4.53e-38	0	1.47e-29	0	3.68e-39	0	2.97e-17	0	3.64e-28	0	0.000285	0.0229	1.27e-07	0.000938	zinc ion binding	F
GO:0008271	11	0.811	1	0.981	1	0.963	1	0.898	1	0.631	1	0.995	1	0.75	1	0.798	1	sulfate porter activity	F
GO:0008272	16	0.873	1	0.967	1	0.964	1	0.899	1	0.822	1	0.947	1	0.557	1	0.783	1	sulfate transport	P
GO:0008276	45	7.11e-05	0.0141	3.79e-08	0.000959	2.31e-05	0.003	1.44e-06	0.00289	0.00246	0.12	2.07e-06	0.002	0.0855	1	0.00109	0.06	protein methyltransferase activity	F
GO:0008277	21	0.0473	1	0.00688	0.312	0.116	1	0.00921	0.572	0.0422	1	0.0495	1	0.242	1	0.00336	0.127	regulation of G-protein coupled receptor protein signaling pathway	P
GO:0008283	661	1.79e-06	0.003	4.66e-06	0.00451	0.00174	0.095	0.00062	0.042	0.00208	0.12	0.000491	0.0233	1.66e-07	0	0.000113	0.016	cell proliferation	P
GO:0008284	260	0.155	1	0.0983	1	0.482	1	0.307	1	0.35	1	0.316	1	0.0156	0.488	0.0218	0.999	positive regulation of cell proliferation	P
GO:0008285	201	0.0116	0.608	0.018	1	0.0831	1	0.0222	0.937	0.124	1	0.104	1	0.00441	0.223	0.0456	1	negative regulation of cell proliferation	P
GO:0008286	34	0.0806	1	0.0599	1	0.231	1	0.155	1	0.378	1	0.105	1	0.0316	0.838	0.214	1	insulin receptor signaling pathway	P
GO:0008287	40	0.054	1	0.0165	0.763	0.0366	1	0.075	1	0.132	1	0.0241	1	0.217	1	0.0698	1	protein serine/threonine phosphatase complex	C
GO:0008289	330	0.00166	0.212	1.09e-06	0.00392	0.0693	1	0.000282	0.042	0.0082	0.692	0.000804	0.0448	0.000844	0.0344	1.2e-05	0.007	lipid binding	F
GO:0008299	17	0.211	1	0.144	1	0.0706	1	0.202	1	0.38	1	0.439	1	0.272	1	0.00208	0.079	isoprenoid biosynthesis	P
GO:0008305	34	0.304	1	0.0426	1	0.436	1	0.308	1	0.377	1	0.0922	1	0.266	1	0.0362	1	integrin complex	C
GO:0008306	14	0.391	1	0.745	1	0.926	1	0.851	1	0.304	1	0.735	1	0.134	1	0.154	1	associative learning	P
GO:0008307	11	0.673	1	0.418	1	0.521	1	0.594	1	0.804	1	0.604	1	0.612	1	0.15	1	structural constituent of muscle	F
GO:0008312	13	0.00283	0.212	0.0505	1	0.103	1	0.0734	1	0.0076	0.692	0.1	1	0.0234	0.838	0.101	1	7S RNA binding	F
GO:0008318	13	0.38	1	0.34	1	0.609	1	0.46	1	0.167	1	0.26	1	0.878	1	0.5	1	protein prenyltransferase activity	F
GO:0008324	748	0.0434	1	0.000157	0.015	0.329	1	0.0311	1	0.307	1	0.00143	0.093	0.00563	0.223	8.2e-05	0.016	cation transporter activity	F
GO:0008344	52	0.337	1	0.347	1	0.603	1	0.537	1	0.542	1	0.315	1	0.148	1	0.221	1	adult locomotory behavior	P
GO:0008360	51	0.00552	0.309	0.0302	1	0.0344	1	0.238	1	0.0326	1	0.016	0.668	0.0205	0.636	0.0553	1	regulation of cell shape	P
GO:0008361	165	0.00735	0.315	0.00346	0.188	0.0696	1	0.0246	1	0.0466	1	0.0197	0.756	0.0647	1	0.00389	0.134	regulation of cell size	P
GO:0008366	42	0.52	1	0.135	1	0.336	1	0.18	1	0.577	1	0.339	1	0.575	1	0.0751	1	axon ensheathment	P
GO:0008373	21	0.374	1	0.604	1	0.547	1	0.947	1	0.569	1	0.408	1	0.0153	0.488	0.181	1	sialyltransferase activity	F
GO:0008374	36	0.0621	1	0.032	1	0.0164	1	0.012	0.647	0.0985	1	0.0435	1	0.44	1	0.171	1	O-acyltransferase activity	F
GO:0008375	32	0.0266	1	0.0367	1	0.0136	0.653	0.0862	1	0.0505	1	0.0669	1	0.242	1	0.0723	1	acetylglucosaminyltransferase activity	F
GO:0008376	27	0.973	1	0.8	1	0.985	1	0.968	1	0.969	1	0.71	1	0.639	1	0.273	1	acetylgalactosaminyltransferase activity	F
GO:0008378	36	0.341	1	0.63	1	0.478	1	0.59	1	0.135	1	0.239	1	0.796	1	0.944	1	galactosyltransferase activity	F
GO:0008380	194	1.51e-17	0	4.36e-16	0	1.92e-15	0	9.63e-16	0	4.11e-11	0	2.62e-08	0.000903	6.35e-06	0.001	6.43e-05	0.007	RNA splicing	P
GO:0008395	10	0.998	1	0.813	1	1	1	0.993	1	0.861	1	0.285	1	0.833	1	0.942	1	steroid hydroxylase activity	F
GO:0008406	69	0.0752	1	0.679	1	0.0692	1	0.804	1	0.179	1	0.394	1	0.174	1	0.783	1	gonad development	P
GO:0008408	22	0.0324	1	0.0198	1	0.0217	1	0.0301	1	0.0838	1	0.0337	1	0.5	1	0.0603	1	3'-5' exonuclease activity	F
GO:0008415	191	4.14e-06	0.00302	9.55e-07	0.00392	4.06e-05	0.00982	3.61e-05	0.00957	6.74e-05	0.024	2.34e-05	0.00587	0.0202	0.636	0.0094	0.428	acyltransferase activity	F
GO:0008417	12	0.528	1	0.404	1	0.623	1	0.185	1	0.836	1	0.572	1	0.241	1	0.699	1	fucosyltransferase activity	F
GO:0008430	32	0.0196	1	0.000204	0.024	0.016	1	0.00249	0.139	0.0864	1	0.0013	0.09	0.0985	1	0.0107	0.476	selenium binding	F
GO:0008443	11	0.34	1	0.365	1	0.189	1	0.379	1	0.351	1	0.289	1	0.842	1	0.627	1	phosphofructokinase activity	F
GO:0008483	26	0.0814	1	0.0219	1	0.161	1	0.102	1	0.108	1	0.0158	0.668	0.359	1	0.0474	1	transaminase activity	F
GO:0008484	14	0.687	1	0.287	1	0.89	1	0.394	1	0.293	1	0.462	1	0.771	1	0.223	1	sulfuric ester hydrolase activity	F
GO:0008493	26	0.735	1	0.312	1	0.959	1	0.776	1	0.624	1	0.294	1	0.66	1	0.147	1	tetracycline transporter activity	F
GO:0008509	181	0.955	1	0.43	1	0.985	1	0.73	1	0.883	1	0.741	1	0.883	1	0.0841	1	anion transporter activity	F
GO:0008514	11	1	1	0.704	1	0.971	1	0.999	1	1	1	0.93	1	0.996	1	0.159	1	organic anion transporter activity	F
GO:0008527	14	0.899	1	1	1	0.786	1	0.995	1	0.615	1	1	1	1	1	0.969	1	taste receptor activity	F
GO:0008528	719	1	1	1	1	1	1	1	1	1	1	1	1	1	1	1	1	peptide receptor activity, G-protein coupled	F
GO:0008533	15	0.923	1	1	1	0.972	1	0.999	1	0.954	1	0.942	1	0.483	1	1	1	astacin activity	F
GO:0008542	26	0.982	1	0.569	1	0.977	1	0.651	1	1	1	0.713	1	0.22	1	0.118	1	visual learning	P
GO:0008543	16	0.507	1	0.712	1	0.688	1	0.49	1	0.327	1	0.902	1	0.462	1	0.393	1	fibroblast growth factor receptor signaling pathway	P
GO:0008544	135	0.492	1	0.734	1	0.826	1	0.823	1	0.681	1	0.659	1	0.0701	1	0.436	1	epidermis development	P
GO:0008553	23	0.00107	0.0886	0.0119	0.607	0.00844	0.653	0.0592	1	0.0462	1	0.0291	1	0.00839	0.275	0.0329	1	hydrogen-exporting ATPase activity, phosphorylative mechanism	F
GO:0008565	132	7.72e-09	0.00257	3.66e-11	0	5.41e-07	0.002	1.21e-11	0	1.08e-05	0.002	6.56e-07	0.002	0.000169	0.008	0.000149	0.016	protein transporter activity	F
GO:0008584	27	0.315	1	0.77	1	0.207	1	0.693	1	0.673	1	0.655	1	0.207	1	0.764	1	male gonad development	P
GO:0008585	46	0.0273	1	0.442	1	0.0867	1	0.549	1	0.0351	1	0.247	1	0.165	1	0.734	1	female gonad development	P
GO:0008589	14	0.196	1	0.315	1	0.472	1	0.634	1	0.199	1	0.184	1	0.148	1	0.53	1	regulation of smoothened signaling pathway	P
GO:0008601	20	0.176	1	0.185	1	0.12	1	0.686	1	0.268	1	0.143	1	0.285	1	0.118	1	protein phosphatase type 2A regulator activity	F
GO:0008603	26	0.7	1	0.565	1	0.877	1	0.711	1	0.904	1	0.924	1	0.0891	1	0.116	1	cAMP-dependent protein kinase regulator activity	F
GO:0008610	302	0.000271	0.019	8.19e-06	0.00451	0.000402	0.04	0.000613	0.042	0.00193	0.12	0.000956	0.09	0.0327	0.838	0.000172	0.016	lipid biosynthesis	P
GO:0008624	23	0.0168	1	0.00486	0.261	0.235	1	0.00666	0.333	0.0229	1	0.0161	0.668	0.0206	0.636	0.0839	1	induction of apoptosis by extracellular signals	P
GO:0008629	34	0.000962	0.0886	0.00036	0.044	0.00105	0.079	0.00206	0.139	0.0141	0.692	0.00394	0.184	0.0332	0.838	0.0136	0.476	induction of apoptosis by intracellular signals	P
GO:0008630	21	0.0843	1	0.00163	0.0965	0.0672	1	0.0107	0.572	0.123	1	0.0227	1	0.342	1	0.0103	0.476	DNA damage response, signal transduction resulting in induction of apoptosis	P
GO:0008632	78	2.08e-08	0.00257	2.16e-06	0.00392	7.95e-06	0.00291	2.42e-05	0.00957	1.14e-05	0.002	7.52e-05	0.011	0.000153	0.008	0.00361	0.127	apoptotic program	P
GO:0008637	25	2.94e-06	0.00302	0.000335	0.044	2.46e-05	0.003	0.000232	0.013	0.00037	0.049	0.00111	0.09	0.00115	0.0614	0.074	1	apoptotic mitochondrial changes	P
GO:0008643	77	0.0363	1	0.0111	0.469	0.107	1	0.096	1	0.0397	1	0.0184	0.668	0.105	1	0.0577	1	carbohydrate transport	P
GO:0008645	42	0.0754	1	0.069	1	0.142	1	0.289	1	0.128	1	0.053	1	0.0597	1	0.202	1	hexose transport	P
GO:0008652	90	0.0387	1	0.0017	0.0965	0.0652	1	0.093	1	0.153	1	0.000214	0.0233	0.0586	1	0.0491	1	amino acid biosynthesis	P
GO:0008654	77	0.0132	0.608	0.000451	0.0474	0.00224	0.103	0.000489	0.042	0.0975	1	0.0913	1	0.398	1	0.114	1	phospholipid biosynthesis	P
GO:0008667	47	0.401	1	0.0496	1	0.353	1	0.265	1	0.45	1	0.0122	0.503	0.556	1	0.133	1	2,3-dihydro-2,3-dihydroxybenzoate dehydrogenase activity	F
GO:0008757	83	8.93e-07	0.00276	1.05e-05	0.00451	5.4e-07	0.002	5.38e-05	0.0107	0.0003	0.049	0.000337	0.0233	0.00488	0.223	0.0136	0.476	S-adenosylmethionine-dependent methyltransferase activity	F
GO:0008943	30	0.982	1	0.865	1	0.879	1	0.974	1	0.999	1	0.498	1	0.881	1	0.742	1	glyceraldehyde-3-phosphate dehydrogenase activity	F
GO:0009055	368	0.718	1	0.878	1	0.964	1	0.995	1	0.514	1	0.676	1	0.574	1	0.459	1	electron carrier activity	F
GO:0009056	677	1.55e-16	0	4.82e-22	0	6.84e-13	0.000708	3.12e-15	0	3.11e-13	0	1.52e-15	0	0.000231	0.012	5.26e-10	0	catabolism	P
GO:0009057	379	1.58e-14	0	1.01e-15	0	5.11e-14	0.000708	5.28e-13	0	9.26e-10	0	3.8e-11	0.00062	0.00161	0.084	2.59e-06	0.002	macromolecule catabolism	P
GO:0009058	1720	1.56e-22	0	1.93e-23	0	6.42e-19	0	2.36e-15	0	3.97e-16	0	1.25e-15	0	9.69e-09	0	1.35e-12	0	biosynthesis	P
GO:0009059	1053	6.7e-17	0	2.76e-15	0	3.7e-14	0.000708	5.82e-11	0	5.73e-12	0	2.46e-11	0.00062	5.99e-07	0.000823	2.33e-07	0.000938	macromolecule biosynthesis	P
GO:0009060	29	0.0413	1	0.078	1	0.0945	1	0.156	1	0.115	1	0.132	1	0.234	1	0.0963	1	aerobic respiration	P
GO:0009063	56	0.161	1	0.00896	0.469	0.458	1	0.0385	1	0.132	1	0.0445	1	0.237	1	0.0233	0.999	amino acid catabolism	P
GO:0009064	42	0.0784	1	0.012	0.607	0.108	1	0.082	1	0.101	1	0.0333	1	0.194	1	0.0307	0.999	glutamine family amino acid metabolism	P
GO:0009065	10	0.13	1	0.276	1	0.197	1	0.164	1	0.108	1	0.492	1	0.423	1	0.309	1	glutamine family amino acid catabolism	P
GO:0009066	24	0.42	1	0.561	1	0.145	1	0.478	1	0.741	1	0.223	1	0.365	1	0.979	1	aspartate family amino acid metabolism	P
GO:0009067	14	0.164	1	0.367	1	0.127	1	0.311	1	0.352	1	0.0549	1	0.153	1	0.994	1	aspartate family amino acid biosynthesis	P
GO:0009069	23	0.165	1	0.00103	0.0965	0.143	1	0.00178	0.124	0.273	1	0.00374	0.18	0.27	1	0.076	1	serine family amino acid metabolism	P
GO:0009071	10	0.524	1	0.000183	0.018	0.589	1	0.000269	0.042	0.549	1	0.00713	0.421	0.543	1	0.000333	0.03	serine family amino acid catabolism	P
GO:0009072	75	0.467	1	0.0945	1	0.606	1	0.634	1	0.532	1	0.0583	1	0.401	1	0.0292	0.999	aromatic amino acid family metabolism	P
GO:0009073	48	0.463	1	0.0643	1	0.411	1	0.313	1	0.506	1	0.0155	0.668	0.576	1	0.137	1	aromatic amino acid family biosynthesis	P
GO:0009074	12	0.641	1	0.736	1	0.932	1	0.994	1	0.745	1	0.857	1	0.375	1	0.435	1	aromatic amino acid family catabolism	P
GO:0009075	11	0.648	1	0.573	1	0.878	1	0.722	1	0.494	1	0.643	1	0.326	1	0.253	1	histidine family amino acid metabolism	P
GO:0009077	11	0.648	1	0.573	1	0.878	1	0.722	1	0.494	1	0.643	1	0.326	1	0.253	1	histidine family amino acid catabolism	P
GO:0009081	12	0.000596	0.0886	0.0206	1	0.0106	0.653	0.00571	0.288	0.00504	0.375	0.0563	1	0.054	1	0.161	1	branched chain family amino acid metabolism	P
GO:0009084	17	0.0118	0.608	0.00986	0.469	0.0642	1	0.338	1	0.037	1	0.024	1	0.0203	0.636	0.0067	0.428	glutamine family amino acid biosynthesis	P
GO:0009100	115	0.0303	1	0.0483	1	0.0584	1	0.103	1	0.247	1	0.148	1	0.00769	0.275	0.0122	0.476	glycoprotein metabolism	P
GO:0009101	98	0.0766	1	0.0339	1	0.177	1	0.152	1	0.465	1	0.0912	1	0.00705	0.275	0.00752	0.428	glycoprotein biosynthesis	P
GO:0009108	98	0.00551	0.309	0.0994	1	0.0215	1	0.213	1	0.00294	0.213	0.182	1	0.173	1	0.297	1	coenzyme biosynthesis	P
GO:0009109	29	0.0132	0.608	0.0308	1	0.0701	1	0.0697	1	0.0279	1	0.0453	1	0.155	1	0.121	1	coenzyme catabolism	P
GO:0009110	25	0.0181	1	0.169	1	0.0547	1	0.281	1	0.029	1	0.443	1	0.375	1	0.128	1	vitamin biosynthesis	P
GO:0009112	18	0.0159	1	0.151	1	0.00331	0.203	0.223	1	0.0101	0.692	0.259	1	0.631	1	0.228	1	nucleobase metabolism	P
GO:0009116	28	0.0966	1	0.0722	1	0.111	1	0.0409	1	0.0887	1	0.127	1	0.268	1	0.234	1	nucleoside metabolism	P
GO:0009117	212	0.000134	0.0143	9.49e-05	0.015	0.0108	0.653	0.000763	0.069	0.000104	0.027	0.000697	0.0448	0.0236	0.838	0.0179	0.656	nucleotide metabolism	P
GO:0009119	10	0.0986	1	0.041	1	0.119	1	0.0152	0.647	0.0775	1	0.331	1	0.267	1	0.0637	1	ribonucleoside metabolism	P
GO:0009123	21	0.346	1	0.0107	0.469	0.215	1	0.00449	0.288	0.389	1	0.0499	1	0.723	1	0.142	1	nucleoside monophosphate metabolism	P
GO:0009124	20	0.545	1	0.0184	1	0.435	1	0.00988	0.572	0.509	1	0.0533	1	0.748	1	0.172	1	nucleoside monophosphate biosynthesis	P
GO:0009126	15	0.311	1	0.0307	1	0.155	1	0.0125	0.647	0.41	1	0.126	1	0.817	1	0.26	1	purine nucleoside monophosphate metabolism	P
GO:0009127	14	0.526	1	0.057	1	0.342	1	0.0287	1	0.546	1	0.135	1	0.844	1	0.329	1	purine nucleoside monophosphate biosynthesis	P
GO:0009132	14	0.12	1	0.0219	1	0.198	1	0.0332	1	0.0781	1	0.0981	1	0.25	1	0.263	1	nucleoside diphosphate metabolism	P
GO:0009141	80	0.0169	1	0.0126	0.607	0.0401	1	0.0456	1	0.004	0.213	0.0211	0.756	0.567	1	0.0759	1	nucleoside triphosphate metabolism	P
GO:0009142	61	0.042	1	0.0986	1	0.0529	1	0.0803	1	0.0104	0.692	0.172	1	0.815	1	0.311	1	nucleoside triphosphate biosynthesis	P
GO:0009144	70	0.0093	0.608	0.00909	0.469	0.0246	1	0.0472	1	0.00233	0.12	0.0143	0.668	0.525	1	0.0544	1	purine nucleoside triphosphate metabolism	P
GO:0009145	57	0.038	1	0.0863	1	0.0532	1	0.0953	1	0.00657	0.692	0.127	1	0.892	1	0.341	1	purine nucleoside triphosphate biosynthesis	P
GO:0009147	18	0.132	1	0.0323	1	0.162	1	0.0524	1	0.0855	1	0.0369	1	0.418	1	0.209	1	pyrimidine nucleoside triphosphate metabolism	P
GO:0009150	85	0.0159	1	0.00355	0.188	0.0171	1	0.00315	0.161	0.00506	0.375	0.013	0.668	0.844	1	0.144	1	purine ribonucleotide metabolism	P
GO:0009152	73	0.0541	1	0.0294	1	0.0558	1	0.0219	0.937	0.0155	0.692	0.0756	1	0.958	1	0.278	1	purine ribonucleotide biosynthesis	P
GO:0009156	18	0.459	1	0.0249	1	0.44	1	0.0104	0.572	0.486	1	0.079	1	0.551	1	0.204	1	ribonucleoside monophosphate biosynthesis	P
GO:0009161	19	0.274	1	0.0146	0.607	0.215	1	0.00461	0.288	0.365	1	0.0744	1	0.52	1	0.169	1	ribonucleoside monophosphate metabolism	P
GO:0009165	144	0.00468	0.272	0.00612	0.308	0.0759	1	0.0095	0.572	0.00255	0.129	0.0716	1	0.0758	1	0.0237	0.999	nucleotide biosynthesis	P
GO:0009166	27	0.182	1	0.0227	1	0.371	1	0.0288	1	0.0815	1	0.0922	1	0.427	1	0.243	1	nucleotide catabolism	P
GO:0009167	15	0.311	1	0.0307	1	0.155	1	0.0125	0.647	0.41	1	0.126	1	0.817	1	0.26	1	purine ribonucleoside monophosphate metabolism	P
GO:0009168	14	0.526	1	0.057	1	0.342	1	0.0287	1	0.546	1	0.135	1	0.844	1	0.329	1	purine ribonucleoside monophosphate biosynthesis	P
GO:0009187	47	0.547	1	0.323	1	0.976	1	0.771	1	0.398	1	0.487	1	0.155	1	0.0624	1	cyclic nucleotide metabolism	P
GO:0009190	35	0.259	1	0.301	1	0.862	1	0.537	1	0.193	1	0.681	1	0.0643	1	0.0632	1	cyclic nucleotide biosynthesis	P
GO:0009199	68	0.0182	1	0.0255	1	0.0274	1	0.0296	1	0.00367	0.213	0.0495	1	0.778	1	0.164	1	ribonucleoside triphosphate metabolism	P
GO:0009200	11	0.228	1	0.109	1	0.605	1	0.474	1	0.272	1	0.16	1	0.0672	1	0.1	1	deoxyribonucleoside triphosphate metabolism	P
GO:0009201	58	0.0403	1	0.0783	1	0.0545	1	0.0712	1	0.00724	0.692	0.151	1	0.89	1	0.297	1	ribonucleoside triphosphate biosynthesis	P
GO:0009205	66	0.0188	1	0.0303	1	0.0284	1	0.051	1	0.00411	0.213	0.0319	1	0.765	1	0.193	1	purine ribonucleoside triphosphate metabolism	P
GO:0009206	57	0.038	1	0.0863	1	0.0532	1	0.0953	1	0.00657	0.692	0.127	1	0.892	1	0.341	1	purine ribonucleoside triphosphate biosynthesis	P
GO:0009208	13	0.0696	1	0.00159	0.0965	0.108	1	0.0155	0.647	0.0236	1	0.0114	0.503	0.554	1	0.0521	1	pyrimidine ribonucleoside triphosphate metabolism	P
GO:0009209	13	0.0696	1	0.00159	0.0965	0.108	1	0.0155	0.647	0.0236	1	0.0114	0.503	0.554	1	0.0521	1	pyrimidine ribonucleoside triphosphate biosynthesis	P
GO:0009218	15	0.0332	1	0.00101	0.0965	0.0721	1	0.00761	0.492	0.00888	0.692	0.00713	0.421	0.248	1	0.0625	1	pyrimidine ribonucleotide metabolism	P
GO:0009220	15	0.0332	1	0.00101	0.0965	0.0721	1	0.00761	0.492	0.00888	0.692	0.00713	0.421	0.248	1	0.0625	1	pyrimidine ribonucleotide biosynthesis	P
GO:0009225	15	0.516	1	0.232	1	0.516	1	0.153	1	0.27	1	0.235	1	0.746	1	0.715	1	nucleotide-sugar metabolism	P
GO:0009237	47	0.401	1	0.0496	1	0.353	1	0.265	1	0.45	1	0.0122	0.503	0.556	1	0.133	1	siderophore metabolism	P
GO:0009238	47	0.401	1	0.0496	1	0.353	1	0.265	1	0.45	1	0.0122	0.503	0.556	1	0.133	1	enterobactin metabolism	P
GO:0009239	47	0.401	1	0.0496	1	0.353	1	0.265	1	0.45	1	0.0122	0.503	0.556	1	0.133	1	enterobactin biosynthesis	P
GO:0009250	26	0.863	1	0.0774	1	0.938	1	0.484	1	0.626	1	0.0272	1	0.811	1	0.0757	1	glucan biosynthesis	P
GO:0009259	93	0.0123	0.608	0.00119	0.0965	0.0183	1	0.00068	0.042	0.00403	0.213	0.0119	0.503	0.679	1	0.0868	1	ribonucleotide metabolism	P
GO:0009260	79	0.0451	1	0.00993	0.469	0.0595	1	0.00601	0.288	0.0136	0.692	0.0556	1	0.859	1	0.143	1	ribonucleotide biosynthesis	P
GO:0009262	16	0.186	1	0.0665	1	0.391	1	0.163	1	0.217	1	0.0524	1	0.138	1	0.273	1	deoxyribonucleotide metabolism	P
GO:0009266	229	0.0465	1	0.0515	1	0.0323	1	0.07	1	0.272	1	0.0939	1	0.0335	0.838	0.166	1	response to temperature stimulus	P
GO:0009267	12	0.316	1	0.511	1	0.568	1	0.456	1	0.276	1	0.495	1	0.246	1	0.598	1	cellular response to starvation	P
GO:0009288	40	0.54	1	0.172	1	0.461	1	0.31	1	0.502	1	0.61	1	0.512	1	0.0349	1	flagellum (sensu Bacteria)	C
GO:0009296	14	0.0647	1	0.00031	0.044	0.0467	1	0.0349	1	0.27	1	0.000806	0.0448	0.135	1	0.0454	1	flagellum biogenesis	P
GO:0009306	56	0.185	1	0.105	1	0.227	1	0.248	1	0.2	1	0.0769	1	0.341	1	0.274	1	protein secretion	P
GO:0009308	534	0.000226	0.0172	3.01e-05	0.007	0.00744	0.641	0.000649	0.042	0.00369	0.213	4.62e-05	0.00966	0.000728	0.0344	0.0172	0.656	amine metabolism	P
GO:0009309	121	0.0789	1	0.00407	0.188	0.162	1	0.0939	1	0.251	1	0.0013	0.09	0.0448	1	0.0414	1	amine biosynthesis	P
GO:0009310	66	0.215	1	0.00735	0.312	0.447	1	0.0347	1	0.159	1	0.0346	1	0.351	1	0.0394	1	amine catabolism	P
GO:0009311	11	0.0921	1	0.0314	1	0.108	1	0.138	1	0.397	1	0.00953	0.503	0.00515	0.223	0.0362	1	oligosaccharide metabolism	P
GO:0009314	124	0.00142	0.0886	0.000905	0.087	0.00215	0.095	0.00599	0.288	0.0467	1	0.0799	1	0.00236	0.084	0.00061	0.03	response to radiation	P
GO:0009331	12	0.1	1	0.0927	1	0.172	1	0.146	1	0.371	1	0.155	1	0.056	1	0.185	1	glycerol-3-phosphate dehydrogenase complex	C
GO:0009395	15	0.0275	1	0.148	1	0.0757	1	0.238	1	0.0153	0.692	0.147	1	0.182	1	0.55	1	phospholipid catabolism	P
GO:0009396	10	0.174	1	0.164	1	0.494	1	0.263	1	0.262	1	0.143	1	0.0761	1	0.292	1	folic acid and derivative biosynthesis	P
GO:0009405	32	0.603	1	0.468	1	0.414	1	0.371	1	0.941	1	0.936	1	0.469	1	0.271	1	pathogenesis	P
GO:0009408	18	0.0519	1	0.0308	1	0.00888	0.653	0.196	1	0.642	1	0.00754	0.421	0.0581	1	0.544	1	response to heat	P
GO:0009409	205	0.1	1	0.132	1	0.0761	1	0.0902	1	0.303	1	0.321	1	0.0888	1	0.2	1	response to cold	P
GO:0009410	16	0.0708	1	0.58	1	0.231	1	0.336	1	0.0517	1	0.738	1	0.099	1	0.477	1	response to xenobiotic stimulus	P
GO:0009411	40	0.000121	0.0143	3.16e-05	0.007	0.000327	0.04	0.00178	0.124	0.00616	0.375	0.00481	0.266	0.00137	0.0614	2.91e-05	0.007	response to UV	P
GO:0009416	97	0.0145	0.85	0.00488	0.261	0.0296	1	0.0347	1	0.293	1	0.0561	1	0.00265	0.084	0.00337	0.127	response to light stimulus	P
GO:0009434	25	0.759	1	0.477	1	0.749	1	0.604	1	0.866	1	0.417	1	0.649	1	0.559	1	flagellum (sensu Eukaryota)	C
GO:0009451	31	0.00734	0.315	0.0826	1	0.0272	1	0.175	1	0.0276	1	0.402	1	0.0223	0.636	0.0569	1	RNA modification	P
GO:0009566	61	0.0392	1	0.016	0.763	0.0495	1	0.034	1	0.218	1	0.0558	1	0.03	0.838	0.0447	1	fertilization	P
GO:0009581	58	0.693	1	0.911	1	0.675	1	0.964	1	0.943	1	0.516	1	0.382	1	0.987	1	detection of external stimulus	P
GO:0009582	48	0.733	1	0.938	1	0.7	1	0.922	1	0.922	1	0.582	1	0.513	1	1	1	detection of abiotic stimulus	P
GO:0009583	28	0.734	1	0.661	1	0.677	1	0.886	1	0.909	1	0.219	1	0.493	1	0.988	1	detection of light stimulus	P
GO:0009593	29	1	1	0.999	1	1	1	1	1	0.984	1	0.99	1	0.998	1	0.927	1	detection of chemical stimulus	P
GO:0009595	11	0.524	1	0.513	1	0.525	1	0.942	1	0.802	1	0.445	1	0.33	1	0.327	1	detection of biotic stimulus	P
GO:0009605	736	0.54	1	0.189	1	0.908	1	0.682	1	0.97	1	0.275	1	0.00442	0.223	0.0113	0.476	response to external stimulus	P
GO:0009607	255	0.7	1	0.763	1	0.661	1	0.8	1	0.887	1	0.412	1	0.261	1	0.907	1	response to biotic stimulus	P
GO:0009611	467	0.902	1	0.739	1	0.978	1	0.775	1	0.993	1	0.928	1	0.141	1	0.0899	1	response to wounding	P
GO:0009612	31	0.0775	1	0.169	1	0.105	1	0.146	1	0.234	1	0.0705	1	0.0656	1	0.487	1	response to mechanical stimulus	P
GO:0009615	81	0.97	1	0.859	1	0.985	1	0.9	1	0.989	1	0.775	1	0.498	1	0.815	1	response to virus	P
GO:0009617	101	0.986	1	0.993	1	1	1	0.999	1	0.984	1	0.963	1	0.456	1	0.815	1	response to bacterium	P
GO:0009620	14	0.716	1	0.508	1	0.766	1	0.747	1	0.711	1	0.46	1	0.615	1	0.332	1	response to fungus	P
GO:0009628	407	4.49e-05	0.00952	0.000125	0.015	0.000124	0.0116	0.000412	0.042	0.0205	0.79	0.00429	0.266	3.07e-05	0.004	0.00411	0.201	response to abiotic stimulus	P
GO:0009636	31	0.0542	1	0.0379	1	0.0948	1	0.0266	1	0.218	1	0.105	1	0.062	1	0.391	1	response to toxin	P
GO:0009653	1355	0.000197	0.0172	0.000586	0.059	0.019	1	0.0372	1	0.00712	0.692	0.0224	1	0.000224	0.012	1.01e-05	0.007	morphogenesis	P
GO:0009698	48	0.463	1	0.0643	1	0.411	1	0.313	1	0.506	1	0.0155	0.668	0.576	1	0.137	1	phenylpropanoid metabolism	P
GO:0009712	47	0.401	1	0.0496	1	0.353	1	0.265	1	0.45	1	0.0122	0.503	0.556	1	0.133	1	catechol metabolism	P
GO:0009719	423	4.05e-13	0	7.4e-17	0	3.97e-11	0.000708	2.61e-14	0	1.3e-08	0	1.29e-09	0.00062	7.76e-05	0.008	1.21e-07	0.000938	response to endogenous stimulus	P
GO:0009725	99	0.326	1	0.252	1	0.364	1	0.512	1	0.658	1	0.0715	1	0.0973	1	0.541	1	response to hormone stimulus	P
GO:0009743	26	0.0406	1	0.00482	0.261	0.15	1	0.0541	1	0.0611	1	0.0337	1	0.021	0.636	0.00328	0.127	response to carbohydrate stimulus	P
GO:0009746	21	0.0672	1	0.00421	0.188	0.139	1	0.0593	1	0.103	1	0.0857	1	0.0433	1	0.000101	0.016	response to hexose stimulus	P
GO:0009749	21	0.0672	1	0.00421	0.188	0.139	1	0.0593	1	0.103	1	0.0857	1	0.0433	1	0.000101	0.016	response to glucose stimulus	P
GO:0009755	11	0.0187	1	0.0124	0.607	0.00217	0.095	0.0578	1	0.0444	1	0.0391	1	0.393	1	0.0143	0.476	hormone-mediated signaling	P
GO:0009790	541	0.0035	0.212	0.0146	0.607	0.0127	0.653	0.0504	1	0.0154	0.692	0.092	1	0.0564	1	0.0208	0.999	embryonic development	P
GO:0009791	91	0.0414	1	0.534	1	0.198	1	0.489	1	0.0401	1	0.448	1	0.0407	1	0.608	1	post-embryonic development	P
GO:0009792	314	0.000178	0.0172	0.00136	0.0965	0.000108	0.0116	0.000677	0.042	0.00178	0.12	0.0239	1	0.129	1	0.088	1	embryonic development (sensu Metazoa)	P
GO:0009798	19	0.134	1	0.268	1	0.167	1	0.238	1	0.515	1	0.373	1	0.0903	1	0.18	1	axis specification	P
GO:0009799	35	0.358	1	0.713	1	0.286	1	0.57	1	0.142	1	0.874	1	0.932	1	0.644	1	determination of symmetry	P
GO:0009855	35	0.358	1	0.713	1	0.286	1	0.57	1	0.142	1	0.874	1	0.932	1	0.644	1	determination of bilateral symmetry	P
GO:0009880	49	0.379	1	0.815	1	0.569	1	0.952	1	0.708	1	0.775	1	0.0758	1	0.382	1	embryonic pattern specification	P
GO:0009881	11	0.526	1	0.493	1	0.637	1	0.847	1	0.456	1	0.0982	1	0.206	1	0.906	1	photoreceptor activity	F
GO:0009887	763	0.0765	1	0.524	1	0.412	1	0.7	1	0.193	1	0.857	1	0.0119	0.339	0.0479	1	organ morphogenesis	P
GO:0009888	403	0.0123	0.608	0.209	1	0.219	1	0.302	1	0.0327	1	0.434	1	0.0095	0.275	0.0608	1	tissue development	P
GO:0009889	206	0.000293	0.019	3.32e-07	0.00392	0.0109	0.653	0.00154	0.096	0.0167	0.692	8.86e-05	0.011	0.000183	0.008	9.49e-06	0.007	regulation of biosynthesis	P
GO:0009890	47	0.000134	0.0143	4.18e-05	0.007	0.000534	0.049	0.0122	0.647	0.0119	0.692	0.00133	0.09	0.00104	0.0362	0.00325	0.127	negative regulation of biosynthesis	P
GO:0009891	87	0.18	1	0.00644	0.312	0.778	1	0.212	1	0.425	1	0.142	1	0.00524	0.223	6.13e-05	0.007	positive regulation of biosynthesis	P
GO:0009892	476	3.67e-15	0	1.02e-15	0	9.4e-14	0.000708	2.13e-12	0	2.84e-07	0.000959	1.99e-09	0.000878	2.57e-09	0	4.39e-09	0	negative regulation of metabolism	P
GO:0009893	598	4.19e-06	0.00302	3.8e-09	0.00089	1.73e-05	0.003	2.28e-05	0.00957	0.0353	1	7.68e-06	0.00587	1.4e-05	0.00363	7.55e-09	0	positive regulation of metabolism	P
GO:0009894	32	0.0264	1	0.000333	0.044	0.0775	1	0.000455	0.042	0.107	1	0.0484	1	0.205	1	0.00556	0.428	regulation of catabolism	P
GO:0009896	10	0.21	1	0.152	1	0.848	1	0.123	1	0.242	1	0.286	1	0.216	1	0.258	1	positive regulation of catabolism	P
GO:0009897	151	0.934	1	0.331	1	0.901	1	0.583	1	0.972	1	0.402	1	0.625	1	0.123	1	external side of plasma membrane	C
GO:0009913	60	0.889	1	0.859	1	0.94	1	0.897	1	0.816	1	0.691	1	0.783	1	0.841	1	epidermal cell differentiation	P
GO:0009925	30	0.862	1	0.85	1	0.521	1	0.725	1	0.984	1	0.563	1	0.377	1	0.991	1	basal plasma membrane	C
GO:0009948	12	0.0668	1	0.15	1	0.12	1	0.0716	1	0.301	1	0.411	1	0.0488	1	0.251	1	anterior/posterior axis specification	P
GO:0009952	139	0.996	1	0.998	1	0.985	1	0.969	1	0.951	1	0.976	1	0.998	1	1	1	anterior/posterior pattern formation	P
GO:0009953	48	0.248	1	0.899	1	0.469	1	0.985	1	0.164	1	0.898	1	0.321	1	0.357	1	dorsal/ventral pattern formation	P
GO:0009954	24	0.929	1	1	1	1	1	1	1	0.944	1	1	1	0.341	1	0.989	1	proximal/distal pattern formation	P
GO:0009966	519	0.00891	0.608	4.28e-07	0.00392	0.197	1	0.0055	0.288	0.186	1	0.000415	0.0233	0.000254	0.012	7.72e-09	0	regulation of signal transduction	P
GO:0009967	161	0.0302	1	0.000114	0.015	0.163	1	0.011	0.572	0.433	1	0.022	1	0.000835	0.0344	7.12e-05	0.007	positive regulation of signal transduction	P
GO:0009968	130	0.0192	1	0.00746	0.312	0.21	1	0.376	1	0.102	1	0.0166	0.668	0.00937	0.275	0.000239	0.0233	negative regulation of signal transduction	P
GO:0009975	25	0.39	1	0.285	1	0.606	1	0.506	1	0.222	1	0.36	1	0.549	1	0.177	1	cyclase activity	F
GO:0009982	35	0.201	1	0.101	1	0.288	1	0.243	1	0.49	1	0.294	1	0.11	1	0.0728	1	pseudouridine synthase activity	F
GO:0009986	282	0.765	1	0.0272	1	0.842	1	0.152	1	0.897	1	0.0363	1	0.411	1	0.0148	0.656	cell surface	C
GO:0009987	14223	2.55e-29	0	0	0	9.03e-31	0	0	0	9.01e-22	0	1.4e-45	0	6.72e-05	0.008	8.85e-29	0	cellular process	P
GO:0009991	78	0.00271	0.212	0.00518	0.279	0.000696	0.049	0.00385	0.288	0.0479	1	0.00926	0.503	0.13	1	0.205	1	response to extracellular stimulus	P
GO:0009994	14	0.0215	1	0.241	1	0.0621	1	0.382	1	0.116	1	0.143	1	0.14	1	0.745	1	oocyte differentiation	P
GO:0010001	45	0.583	1	0.822	1	0.362	1	0.579	1	0.767	1	0.742	1	0.51	1	0.903	1	glial cell differentiation	P
GO:0010008	93	5.75e-05	0.012	1.81e-07	0.00392	0.0134	0.653	0.000157	0.013	0.00179	0.12	6.35e-05	0.00966	0.00143	0.0614	0.00108	0.06	endosome membrane	C
GO:0010033	83	0.125	1	0.115	1	0.625	1	0.193	1	0.114	1	0.142	1	0.0204	0.636	0.0769	1	response to organic substance	P
GO:0010035	54	0.0573	1	0.0669	1	0.126	1	0.0439	1	0.461	1	0.175	1	0.0138	0.478	0.541	1	response to inorganic substance	P
GO:0010038	48	0.0613	1	0.1	1	0.182	1	0.0547	1	0.353	1	0.213	1	0.0184	0.636	0.566	1	response to metal ion	P
GO:0010092	14	0.719	1	0.845	1	0.885	1	0.504	1	0.526	1	0.971	1	0.636	1	0.813	1	specification of organ identity	P
GO:0010165	15	0.0226	1	0.0566	1	0.00284	0.135	0.115	1	0.149	1	0.171	1	0.0667	1	0.2	1	response to X-ray	P
GO:0010181	12	0.195	1	0.565	1	0.101	1	0.87	1	0.633	1	0.721	1	0.253	1	0.262	1	FMN binding	F
GO:0010212	13	0.26	1	0.0546	1	0.267	1	0.074	1	0.105	1	0.339	1	0.808	1	0.0427	1	response to ionizing radiation	P
GO:0012501	795	4.61e-12	0.00257	2.56e-14	0	1.59e-08	0.00098	4.3e-11	0	5.67e-07	0.001	2.07e-09	0.000878	7.56e-07	0.000823	5e-07	0.00192	programmed cell death	P
GO:0012502	189	0.000117	0.0143	1.79e-05	0.00451	0.00179	0.095	0.000173	0.013	0.00451	0.213	7.76e-05	0.011	0.00125	0.0614	0.0103	0.476	induction of programmed cell death	P
GO:0012505	1009	1.7e-12	0	2.41e-20	0	1.66e-09	0.00098	8.51e-15	0	2.39e-09	0	8.89e-13	0.00062	2.09e-05	0.004	7.6e-10	0	endomembrane system	C
GO:0012506	117	0.0019	0.212	2.38e-05	0.007	0.00574	0.469	0.000204	0.013	0.0227	1	0.000273	0.0233	0.0236	0.838	0.00626	0.428	vesicle membrane	C
GO:0012510	11	0.204	1	0.111	1	0.217	1	0.344	1	0.534	1	0.0938	1	0.114	1	0.151	1	trans-Golgi network transport vesicle membrane	C
GO:0014003	11	0.484	1	0.546	1	0.16	1	0.543	1	0.784	1	0.464	1	0.433	1	0.619	1	oligodendrocyte development	P
GO:0014013	12	0.922	1	0.962	1	0.943	1	0.954	1	0.648	1	0.882	1	0.937	1	0.94	1	regulation of gliogenesis	P
GO:0014020	35	0.31	1	0.0528	1	0.31	1	0.0688	1	0.177	1	0.0874	1	0.491	1	0.134	1	primary neural tube formation	P
GO:0014031	42	0.896	1	0.945	1	0.687	1	0.875	1	0.978	1	0.892	1	0.56	1	0.95	1	mesenchymal cell development	P
GO:0014032	31	0.988	1	1	1	0.988	1	0.987	1	0.927	1	1	1	0.89	1	0.997	1	neural crest cell development	P
GO:0014033	31	0.988	1	1	1	0.988	1	0.987	1	0.927	1	1	1	0.89	1	0.997	1	neural crest cell differentiation	P
GO:0014037	10	0.425	1	0.394	1	0.542	1	0.23	1	0.361	1	0.286	1	0.423	1	0.896	1	Schwann cell differentiation	P
GO:0014069	22	0.938	1	0.647	1	0.988	1	0.787	1	0.991	1	0.844	1	0.237	1	0.26	1	postsynaptic density	C
GO:0015002	30	0.165	1	0.239	1	0.0887	1	0.0595	1	0.203	1	0.269	1	0.578	1	0.657	1	heme-copper terminal oxidase activity	F
GO:0015020	16	0.998	1	1	1	1	1	0.989	1	0.993	1	1	1	0.876	1	1	1	glucuronosyltransferase activity	F
GO:0015031	828	2.38e-25	0	3.7e-37	0	1.98e-19	0	2.19e-30	0	4.37e-22	0	2e-24	0	2.63e-07	0	1.15e-13	0	protein transport	P
GO:0015035	11	0.857	1	0.486	1	0.952	1	0.423	1	0.35	1	0.303	1	0.988	1	0.457	1	protein disulfide oxidoreductase activity	F
GO:0015036	17	0.452	1	0.159	1	0.598	1	0.178	1	0.131	1	0.039	1	0.754	1	0.458	1	disulfide oxidoreductase activity	F
GO:0015057	39	0.786	1	0.354	1	0.963	1	0.638	1	0.526	1	0.447	1	0.56	1	0.33	1	thrombin receptor activity	F
GO:0015075	897	0.172	1	0.00173	0.0965	0.672	1	0.112	1	0.502	1	0.0246	1	0.0202	0.636	0.000101	0.016	ion transporter activity	F
GO:0015077	140	0.000808	0.0886	0.00622	0.308	0.00744	0.641	0.0161	0.647	0.00192	0.12	0.0162	0.668	0.0304	0.838	0.0429	1	monovalent inorganic cation transporter activity	F
GO:0015078	135	0.000597	0.0886	0.00661	0.312	0.00442	0.308	0.0211	0.937	0.00157	0.12	0.013	0.668	0.0279	0.838	0.0494	1	hydrogen ion transporter activity	F
GO:0015082	39	0.166	1	0.0243	1	0.123	1	0.0309	1	0.392	1	0.0819	1	0.612	1	0.406	1	di-, tri-valent inorganic cation transporter activity	F
GO:0015103	39	0.421	1	0.253	1	0.535	1	0.127	1	0.324	1	0.689	1	0.655	1	0.276	1	inorganic anion transporter activity	F
GO:0015106	22	0.404	1	0.176	1	0.852	1	0.0878	1	0.179	1	0.747	1	0.35	1	0.0976	1	bicarbonate transporter activity	F
GO:0015108	23	0.372	1	0.141	1	0.831	1	0.0688	1	0.167	1	0.679	1	0.356	1	0.0846	1	chloride transporter activity	F
GO:0015116	11	0.811	1	0.981	1	0.963	1	0.898	1	0.631	1	0.995	1	0.75	1	0.798	1	sulfate transporter activity	F
GO:0015144	47	0.0674	1	0.021	1	0.182	1	0.0909	1	0.051	1	0.0301	1	0.204	1	0.0838	1	carbohydrate transporter activity	F
GO:0015145	14	0.0676	1	0.0224	1	0.197	1	0.205	1	0.105	1	0.00851	0.503	0.0339	0.838	0.0922	1	monosaccharide transporter activity	F
GO:0015149	13	0.118	1	0.0376	1	0.337	1	0.322	1	0.151	1	0.0123	0.503	0.0486	1	0.109	1	hexose transporter activity	F
GO:0015171	56	0.32	1	0.0119	0.607	0.263	1	0.0661	1	0.302	1	0.0161	0.668	0.527	1	0.0814	1	amino acid transporter activity	F
GO:0015172	10	0.476	1	0.215	1	0.392	1	0.17	1	0.482	1	0.494	1	0.529	1	0.347	1	acidic amino acid transporter activity	F
GO:0015175	12	0.338	1	0.0478	1	0.498	1	0.384	1	0.771	1	0.0201	0.756	0.062	1	0.0381	1	neutral amino acid transporter activity	F
GO:0015179	31	0.424	1	0.348	1	0.47	1	0.507	1	0.303	1	0.7	1	0.413	1	0.207	1	L-amino acid transporter activity	F
GO:0015197	15	0.604	1	0.125	1	0.833	1	0.414	1	0.466	1	0.0987	1	0.322	1	0.131	1	peptide transporter activity	F
GO:0015198	10	0.693	1	0.288	1	0.998	1	0.366	1	0.281	1	0.327	1	0.345	1	0.29	1	oligopeptide transporter activity	F
GO:0015203	20	0.701	1	0.668	1	0.875	1	0.693	1	0.635	1	0.398	1	0.457	1	0.817	1	polyamine transporter activity	F
GO:0015232	20	0.814	1	0.315	1	0.649	1	0.317	1	0.842	1	0.204	1	0.912	1	0.844	1	heme transporter activity	F
GO:0015238	34	0.924	1	0.487	1	0.997	1	0.911	1	0.855	1	0.445	1	0.752	1	0.219	1	drug transporter activity	F
GO:0015247	16	0.981	1	0.68	1	0.854	1	0.551	1	1	1	0.568	1	0.88	1	0.871	1	aminophospholipid transporter activity	F
GO:0015248	10	0.44	1	0.905	1	0.669	1	0.867	1	0.154	1	0.942	1	0.694	1	0.667	1	sterol transporter activity	F
GO:0015250	10	0.38	1	0.109	1	0.278	1	0.0136	0.647	0.354	1	0.293	1	0.726	1	0.48	1	water channel activity	F
GO:0015267	461	0.622	1	0.238	1	0.945	1	0.683	1	0.918	1	0.567	1	0.0198	0.636	0.00438	0.201	channel or pore class transporter activity	F
GO:0015268	461	0.622	1	0.238	1	0.945	1	0.683	1	0.918	1	0.567	1	0.0198	0.636	0.00438	0.201	alpha-type channel activity	F
GO:0015269	12	0.698	1	0.938	1	0.971	1	1	1	0.962	1	0.415	1	0.232	1	0.273	1	calcium-activated potassium channel activity	F
GO:0015276	104	0.912	1	0.928	1	0.992	1	0.885	1	0.85	1	0.928	1	0.388	1	0.653	1	ligand-gated ion channel activity	F
GO:0015290	304	0.546	1	0.0425	1	0.595	1	0.189	1	0.305	1	0.13	1	0.833	1	0.0407	1	electrochemical potential-driven transporter activity	F
GO:0015291	304	0.546	1	0.0425	1	0.595	1	0.189	1	0.305	1	0.13	1	0.833	1	0.0407	1	porter activity	F
GO:0015293	186	0.848	1	0.279	1	0.727	1	0.432	1	0.734	1	0.3	1	0.934	1	0.374	1	symporter activity	F
GO:0015294	125	0.886	1	0.347	1	0.862	1	0.683	1	0.924	1	0.252	1	0.688	1	0.266	1	solute:cation symporter activity	F
GO:0015296	75	0.636	1	0.35	1	0.725	1	0.651	1	0.719	1	0.276	1	0.497	1	0.314	1	anion:cation symporter activity	F
GO:0015297	86	0.347	1	0.0858	1	0.482	1	0.215	1	0.17	1	0.314	1	0.576	1	0.0211	0.999	antiporter activity	F
GO:0015298	39	0.727	1	0.193	1	0.829	1	0.405	1	0.605	1	0.314	1	0.762	1	0.116	1	solute:cation antiporter activity	F
GO:0015299	39	0.727	1	0.193	1	0.829	1	0.405	1	0.605	1	0.314	1	0.762	1	0.116	1	solute:hydrogen antiporter activity	F
GO:0015300	41	0.615	1	0.139	1	0.802	1	0.327	1	0.342	1	0.199	1	0.796	1	0.103	1	solute:solute antiporter activity	F
GO:0015301	22	0.404	1	0.176	1	0.852	1	0.0878	1	0.179	1	0.747	1	0.35	1	0.0976	1	anion:anion antiporter activity	F
GO:0015307	26	0.735	1	0.312	1	0.959	1	0.776	1	0.624	1	0.294	1	0.66	1	0.147	1	drug:hydrogen antiporter activity	F
GO:0015370	122	0.94	1	0.458	1	0.911	1	0.777	1	0.955	1	0.321	1	0.814	1	0.371	1	solute:sodium symporter activity	F
GO:0015380	21	0.318	1	0.145	1	0.782	1	0.0749	1	0.134	1	0.663	1	0.258	1	0.0971	1	anion exchanger activity	F
GO:0015385	19	0.193	1	0.271	1	0.177	1	0.323	1	0.092	1	0.493	1	0.457	1	0.106	1	sodium:hydrogen antiporter activity	F
GO:0015399	128	0.122	1	0.0523	1	0.122	1	0.0829	1	0.18	1	0.0466	1	0.488	1	0.288	1	primary active transporter activity	F
GO:0015405	128	0.122	1	0.0523	1	0.122	1	0.0829	1	0.18	1	0.0466	1	0.488	1	0.288	1	P-P-bond-hydrolysis-driven transporter activity	F
GO:0015450	29	0.554	1	0.595	1	0.415	1	0.376	1	0.48	1	0.449	1	0.702	1	0.816	1	protein translocase activity	F
GO:0015457	27	0.712	1	0.172	1	0.91	1	0.407	1	0.941	1	0.187	1	0.0794	1	0.0442	1	auxiliary transport protein activity	F
GO:0015464	26	0.965	1	0.998	1	0.896	1	1	1	0.995	1	0.966	1	0.701	1	0.735	1	acetylcholine receptor activity	F
GO:0015485	12	0.295	1	0.5	1	0.134	1	0.532	1	0.147	1	0.367	1	0.902	1	0.742	1	cholesterol binding	F
GO:0015491	26	0.294	1	0.42	1	0.193	1	0.644	1	0.262	1	0.665	1	0.422	1	0.032	1	cation:cation antiporter activity	F
GO:0015520	26	0.735	1	0.312	1	0.959	1	0.776	1	0.624	1	0.294	1	0.66	1	0.147	1	tetracycline:hydrogen antiporter activity	F
GO:0015629	288	1.97e-06	0.003	2.64e-08	0.000959	0.00052	0.049	9.03e-05	0.013	2.25e-05	0.00537	0.000694	0.0448	0.000282	0.0229	2.71e-08	0	actin cytoskeleton	C
GO:0015630	416	7.82e-14	0	1.06e-13	0	2.05e-14	0.000708	6.29e-13	0	6.16e-08	0.000959	2.26e-08	0.000903	7.48e-06	0.001	0.000108	0.016	microtubule cytoskeleton	C
GO:0015631	75	7.85e-06	0.00362	6.9e-06	0.00451	0.00014	0.0116	0.000485	0.042	0.000791	0.12	0.000369	0.0233	0.00279	0.084	0.000165	0.016	tubulin binding	F
GO:0015645	15	0.146	1	0.0648	1	0.322	1	0.0754	1	0.355	1	0.297	1	0.011	0.339	0.119	1	fatty-acid ligase activity	F
GO:0015662	70	0.196	1	0.055	1	0.341	1	0.088	1	0.476	1	0.0451	1	0.134	1	0.274	1	ATPase activity, coupled to transmembrane movement of ions, phosphorylative mechanism	F
GO:0015669	16	0.837	1	0.227	1	0.306	1	0.121	1	1	1	0.143	1	0.655	1	0.823	1	gas transport	P
GO:0015671	14	0.833	1	0.2	1	0.339	1	0.118	1	0.999	1	0.125	1	0.665	1	0.771	1	oxygen transport	P
GO:0015672	465	0.271	1	0.0534	1	0.609	1	0.201	1	0.408	1	0.0744	1	0.18	1	0.0597	1	monovalent inorganic cation transport	P
GO:0015674	237	0.27	1	0.00466	0.261	0.727	1	0.134	1	0.631	1	0.0767	1	0.0239	0.838	0.000439	0.03	di-, tri-valent inorganic cation transport	P
GO:0015698	178	1	1	0.951	1	1	1	0.998	1	0.999	1	0.994	1	0.907	1	0.208	1	inorganic anion transport	P
GO:0015711	15	0.702	1	0.283	1	0.368	1	0.733	1	0.945	1	0.794	1	0.766	1	0.0228	0.999	organic anion transport	P
GO:0015749	42	0.0754	1	0.069	1	0.142	1	0.289	1	0.128	1	0.053	1	0.0597	1	0.202	1	monosaccharide transport	P
GO:0015758	41	0.0767	1	0.0621	1	0.15	1	0.285	1	0.137	1	0.0517	1	0.0496	1	0.165	1	glucose transport	P
GO:0015800	16	0.00621	0.309	0.00135	0.0965	0.0161	1	0.000982	0.094	0.00952	0.692	0.023	1	0.134	1	0.0257	0.999	acidic amino acid transport	P
GO:0015804	11	0.629	1	0.115	1	0.67	1	0.523	1	0.903	1	0.046	1	0.14	1	0.0902	1	neutral amino acid transport	P
GO:0015807	15	0.0558	1	0.15	1	0.136	1	0.601	1	0.167	1	0.499	1	0.119	1	0.0313	0.999	L-amino acid transport	P
GO:0015813	16	0.00621	0.309	0.00135	0.0965	0.0161	1	0.000982	0.094	0.00952	0.692	0.023	1	0.134	1	0.0257	0.999	glutamate transport	P
GO:0015833	64	0.308	1	0.0739	1	0.614	1	0.448	1	0.507	1	0.137	1	0.0328	0.838	0.00648	0.428	peptide transport	P
GO:0015837	91	0.153	1	0.0126	0.607	0.0851	1	0.179	1	0.145	1	0.0125	0.503	0.497	1	0.00952	0.428	amine transport	P
GO:0015849	150	0.227	1	0.0483	1	0.303	1	0.347	1	0.136	1	0.048	1	0.398	1	0.0271	0.999	organic acid transport	P
GO:0015886	20	0.814	1	0.315	1	0.649	1	0.317	1	0.842	1	0.204	1	0.912	1	0.844	1	heme transport	P
GO:0015893	33	0.924	1	0.477	1	0.998	1	0.911	1	0.855	1	0.456	1	0.753	1	0.219	1	drug transport	P
GO:0015904	26	0.735	1	0.312	1	0.959	1	0.776	1	0.624	1	0.294	1	0.66	1	0.147	1	tetracycline transport	P
GO:0015914	20	0.819	1	0.834	1	0.972	1	0.871	1	0.987	1	0.604	1	0.311	1	0.762	1	phospholipid transport	P
GO:0015918	16	0.327	1	0.632	1	0.348	1	0.625	1	0.711	1	0.689	1	0.078	1	0.426	1	sterol transport	P
GO:0015923	16	0.0986	1	0.023	1	0.17	1	0.28	1	0.073	1	0.0396	1	0.383	1	0.0139	0.476	mannosidase activity	F
GO:0015924	10	0.189	1	0.0227	1	0.118	1	0.471	1	0.213	1	0.0663	1	0.443	1	0.0073	0.428	mannosyl-oligosaccharide mannosidase activity	F
GO:0015929	15	0.321	1	0.48	1	0.367	1	0.416	1	0.501	1	0.235	1	0.25	1	0.709	1	hexosaminidase activity	F
GO:0015931	70	2.32e-06	0.003	2.63e-09	0.00089	0.000105	0.0116	3.07e-09	0	1.07e-05	0.002	8.19e-05	0.011	0.279	1	0.000601	0.03	nucleobase, nucleoside, nucleotide and nucleic acid transport	P
GO:0015932	14	0.34	1	0.525	1	0.689	1	0.581	1	0.292	1	0.505	1	0.277	1	0.279	1	nucleobase, nucleoside, nucleotide and nucleic acid transporter activity	F
GO:0015934	43	0.0727	1	0.111	1	0.0772	1	0.0539	1	0.043	1	0.155	1	0.611	1	0.527	1	large ribosomal subunit	C
GO:0015935	42	0.000681	0.0886	0.0103	0.469	0.000661	0.049	0.108	1	0.00368	0.213	0.00453	0.266	0.305	1	0.0726	1	small ribosomal subunit	C
GO:0015936	12	0.0151	1	0.0317	1	0.026	1	0.028	1	0.0282	1	0.374	1	0.165	1	0.017	0.656	coenzyme A metabolism	P
GO:0015980	184	0.00161	0.212	1.53e-05	0.00451	0.00146	0.079	0.0267	1	0.0322	1	6.19e-06	0.00587	0.142	1	0.00323	0.127	energy derivation by oxidation of organic compounds	P
GO:0015985	37	0.453	1	0.611	1	0.414	1	0.612	1	0.279	1	0.561	1	0.962	1	0.661	1	energy coupled proton transport, down electrochemical gradient	P
GO:0015986	37	0.453	1	0.611	1	0.414	1	0.612	1	0.279	1	0.561	1	0.962	1	0.661	1	ATP synthesis coupled proton transport	P
GO:0015988	10	0.369	1	0.397	1	0.709	1	0.628	1	0.384	1	0.203	1	0.273	1	0.619	1	energy coupled proton transport, against electrochemical gradient	P
GO:0015992	80	0.125	1	0.0779	1	0.242	1	0.136	1	0.158	1	0.112	1	0.313	1	0.193	1	proton transport	P
GO:0016010	14	0.804	1	0.935	1	0.938	1	0.852	1	0.635	1	0.978	1	0.314	1	0.76	1	dystrophin-associated glycoprotein complex	C
GO:0016020	7990	1	1	0.706	1	1	1	1	1	1	1	0.728	1	0.999	1	0.000609	0.03	membrane	C
GO:0016021	6123	1	1	1	1	1	1	1	1	1	1	1	1	1	1	0.991	1	integral to membrane	C
GO:0016023	349	2.86e-10	0.00257	7.71e-17	0	3.24e-07	0.002	2.84e-12	0	2.79e-06	0.00169	5.03e-10	0.00062	4.54e-07	0.000823	1.04e-09	0	cytoplasmic membrane-bound vesicle	C
GO:0016032	33	0.391	1	0.0788	1	0.772	1	0.282	1	0.612	1	0.252	1	0.0859	1	0.13	1	viral life cycle	P
GO:0016042	116	0.000785	0.0886	6.82e-05	0.007	0.0396	1	0.0223	0.937	0.000212	0.049	0.000315	0.0233	0.0169	0.488	0.00158	0.06	lipid catabolism	P
GO:0016043	2251	0	0	0	0	3.4e-35	0	0	0	9.86e-32	0	1.56e-33	0	1.88e-16	0	1.91e-25	0	cell organization and biogenesis	P
GO:0016044	88	0.00658	0.315	0.0122	0.607	0.0375	1	0.00309	0.161	0.0322	1	0.15	1	0.0129	0.478	0.194	1	membrane organization and biogenesis	P
GO:0016049	151	0.00446	0.214	0.00203	0.13	0.0509	1	0.0209	0.937	0.0263	1	0.0108	0.503	0.0528	1	0.00248	0.079	cell growth	P
GO:0016051	121	0.128	1	0.000461	0.0474	0.674	1	0.00988	0.572	0.0781	1	0.00263	0.144	0.114	1	0.0099	0.476	carbohydrate biosynthesis	P
GO:0016052	99	0.00241	0.212	0.00227	0.171	0.00112	0.079	0.195	1	0.00415	0.213	3.37e-05	0.00952	0.247	1	0.0956	1	carbohydrate catabolism	P
GO:0016053	94	0.0411	1	0.00339	0.188	0.103	1	0.112	1	0.0432	1	0.0147	0.668	0.0703	1	0.00243	0.079	organic acid biosynthesis	P
GO:0016055	126	0.00109	0.0886	0.000463	0.0474	0.0078	0.641	0.00198	0.139	0.0024	0.12	0.0196	0.756	0.0281	0.838	0.00175	0.079	Wnt receptor signaling pathway	P
GO:0016064	126	0.669	1	0.809	1	0.726	1	0.238	1	0.974	1	0.989	1	0.233	1	0.746	1	immunoglobulin mediated immune response	P
GO:0016068	56	0.997	1	0.988	1	0.97	1	0.847	1	0.999	1	0.991	1	0.885	1	0.982	1	type I hypersensitivity	P
GO:0016070	549	2.12e-32	0	8.3e-30	0	9.65e-30	0	9.89e-28	0	1.07e-20	0	1.74e-17	0	1.91e-09	0	2.09e-08	0	RNA metabolism	P
GO:0016071	286	7.26e-23	0	4.27e-21	0	4.23e-20	0	1.24e-19	0	8.91e-15	0	1.65e-11	0.00062	3.55e-08	0	9.19e-07	0.002	mRNA metabolism	P
GO:0016072	72	2.35e-07	0.00257	0.00089	0.087	1.34e-07	0.002	0.000436	0.042	1.71e-06	0.00169	0.0188	0.668	0.071	1	0.259	1	rRNA metabolism	P
GO:0016073	12	0.0229	1	0.00952	0.469	0.0202	1	0.0209	0.937	0.141	1	0.063	1	0.0629	1	0.0259	0.999	snRNA metabolism	P
GO:0016079	15	0.151	1	0.0848	1	0.0778	1	0.206	1	0.365	1	0.0835	1	0.301	1	0.161	1	synaptic vesicle exocytosis	P
GO:0016089	48	0.463	1	0.0643	1	0.411	1	0.313	1	0.506	1	0.0155	0.668	0.576	1	0.137	1	aromatic amino acid family biosynthesis, shikimate pathway	P
GO:0016125	81	0.00214	0.212	0.00536	0.308	0.0173	1	0.0228	0.937	0.0124	0.692	0.0685	1	0.00529	0.223	0.00209	0.079	sterol metabolism	P
GO:0016126	34	0.0436	1	0.177	1	0.0358	1	0.212	1	0.118	1	0.127	1	0.148	1	0.389	1	sterol biosynthesis	P
GO:0016180	12	0.0229	1	0.00952	0.469	0.0202	1	0.0209	0.937	0.141	1	0.063	1	0.0629	1	0.0259	0.999	snRNA processing	P
GO:0016192	507	6.42e-12	0.00257	1.15e-20	0	7.53e-08	0.00098	2.5e-13	0	5.02e-06	0.00169	5.61e-14	0.00062	7.73e-08	0	4.85e-11	0	vesicle-mediated transport	P
GO:0016197	34	0.0283	1	0.000243	0.024	0.155	1	0.00992	0.572	0.0264	1	0.000484	0.0233	0.259	1	0.00349	0.127	endosome transport	P
GO:0016202	15	0.208	1	0.141	1	0.203	1	0.107	1	0.2	1	0.144	1	0.502	1	0.405	1	regulation of striated muscle development	P
GO:0016208	24	0.468	1	0.621	1	0.698	1	0.616	1	0.803	1	0.68	1	0.0766	1	0.586	1	AMP binding	F
GO:0016209	61	0.00577	0.309	0.0271	1	0.0211	1	0.0348	1	0.0514	1	0.0575	1	0.0162	0.488	0.18	1	antioxidant activity	F
GO:0016229	36	0.805	1	0.659	1	0.998	1	0.646	1	0.58	1	0.543	1	0.352	1	0.378	1	steroid dehydrogenase activity	F
GO:0016234	10	0.119	1	0.0822	1	0.108	1	0.138	1	0.119	1	0.137	1	0.491	1	0.299	1	inclusion body	C
GO:0016236	18	0.0251	1	0.0174	0.763	0.0217	1	0.0414	1	0.0151	0.692	0.0776	1	0.7	1	0.0229	0.999	macroautophagy	P
GO:0016247	26	0.708	1	0.212	1	0.91	1	0.443	1	0.938	1	0.239	1	0.0859	1	0.0583	1	channel regulator activity	F
GO:0016251	20	0.00585	0.309	0.0336	1	0.000884	0.049	0.0182	0.937	0.0435	1	0.131	1	0.147	1	0.317	1	general RNA polymerase II transcription factor activity	F
GO:0016265	827	6.08e-12	0.00257	7.46e-14	0	6.95e-08	0.00098	1.69e-10	0	3.13e-07	0.000959	3.67e-09	0.000878	5.82e-07	0.000823	5.28e-07	0.00192	death	P
GO:0016272	10	0.0492	1	0.0472	1	0.000761	0.049	0.0856	1	0.503	1	0.128	1	0.369	1	0.237	1	prefoldin complex	C
GO:0016278	24	0.000125	0.0143	4.96e-08	0.000959	3.42e-05	0.00982	3.87e-06	0.00289	0.00371	0.213	0.000103	0.011	0.0939	1	6.99e-05	0.007	lysine N-methyltransferase activity	F
GO:0016279	24	0.000125	0.0143	4.96e-08	0.000959	3.42e-05	0.00982	3.87e-06	0.00289	0.00371	0.213	0.000103	0.011	0.0939	1	6.99e-05	0.007	protein-lysine N-methyltransferase activity	F
GO:0016284	12	0.685	1	0.304	1	0.338	1	0.429	1	0.726	1	0.324	1	0.829	1	0.154	1	alanine aminopeptidase activity	F
GO:0016289	22	0.899	1	0.532	1	0.939	1	0.576	1	0.751	1	0.184	1	0.709	1	0.604	1	CoA hydrolase activity	F
GO:0016290	16	0.953	1	0.245	1	0.897	1	0.375	1	0.885	1	0.0238	1	0.913	1	0.566	1	palmitoyl-CoA hydrolase activity	F
GO:0016298	81	0.0774	1	0.0342	1	0.233	1	0.368	1	0.0604	1	0.253	1	0.179	1	0.007	0.428	lipase activity	F
GO:0016301	992	3.8e-11	0.00257	1.66e-25	0	1.11e-11	0.000708	5.5e-18	0	3.65e-07	0.000959	1.52e-15	0	0.0023	0.084	1.16e-13	0	kinase activity	F
GO:0016303	11	0.644	1	0.155	1	0.457	1	0.0991	1	0.463	1	0.295	1	0.904	1	0.25	1	phosphatidylinositol 3-kinase activity	F
GO:0016310	871	1.68e-05	0.007	5.33e-14	0	8.82e-06	0.00291	9.12e-10	0	0.00145	0.12	6.98e-09	0.000878	0.0295	0.838	1.7e-09	0	phosphorylation	P
GO:0016311	150	0.00248	0.212	3.41e-05	0.007	0.00479	0.308	0.000181	0.013	0.138	1	0.00956	0.503	0.00205	0.084	0.00218	0.079	dephosphorylation	P
GO:0016323	140	0.0482	1	0.00287	0.188	0.226	1	0.0521	1	0.292	1	0.0153	0.668	0.0172	0.488	0.00724	0.428	basolateral plasma membrane	C
GO:0016324	105	0.893	1	0.156	1	0.969	1	0.307	1	0.974	1	0.617	1	0.237	1	0.0326	1	apical plasma membrane	C
GO:0016327	123	0.0343	1	0.0591	1	0.375	1	0.382	1	0.267	1	0.467	1	0.00273	0.084	0.000679	0.06	apicolateral plasma membrane	C
GO:0016331	69	0.266	1	0.214	1	0.515	1	0.471	1	0.0958	1	0.388	1	0.311	1	0.034	1	morphogenesis of embryonic epithelium	P
GO:0016337	226	1	1	0.95	1	0.996	1	0.966	1	1	1	0.982	1	0.977	1	0.519	1	cell-cell adhesion	P
GO:0016338	23	0.126	1	0.333	1	0.301	1	0.273	1	0.432	1	0.787	1	0.0307	0.838	0.138	1	calcium-independent cell-cell adhesion	P
GO:0016339	12	0.995	1	0.994	1	0.694	1	0.993	1	1	1	1	1	0.954	1	0.174	1	calcium-dependent cell-cell adhesion	P
GO:0016358	41	0.137	1	0.0826	1	0.317	1	0.326	1	0.266	1	0.198	1	0.114	1	0.0358	1	dendrite development	P
GO:0016363	41	3.3e-05	0.007	9.59e-06	0.00451	2.23e-06	0.002	5e-05	0.0107	0.00598	0.375	0.00223	0.127	0.0136	0.478	0.0252	0.999	nuclear matrix	C
GO:0016407	67	0.000496	0.044	0.00111	0.0965	0.000599	0.049	0.00152	0.096	0.00223	0.12	0.00613	0.421	0.0983	1	0.0496	1	acetyltransferase activity	F
GO:0016408	13	0.0358	1	0.104	1	0.078	1	0.322	1	0.138	1	0.34	1	0.0269	0.838	0.0213	0.999	C-acyltransferase activity	F
GO:0016409	17	0.164	1	0.0309	1	0.374	1	0.127	1	0.112	1	0.0406	1	0.204	1	0.266	1	palmitoyltransferase activity	F
GO:0016410	68	0.00185	0.212	0.00159	0.0965	0.00464	0.308	0.00386	0.288	0.00853	0.692	0.0154	0.668	0.0876	1	0.00764	0.428	N-acyltransferase activity	F
GO:0016411	14	0.0953	1	0.35	1	0.0408	1	0.203	1	0.0736	1	0.5	1	0.553	1	0.427	1	acylglycerol O-acyltransferase activity	F
GO:0016439	29	0.44	1	0.307	1	0.896	1	0.716	1	0.637	1	0.303	1	0.113	1	0.265	1	tRNA-pseudouridine synthase activity	F
GO:0016444	28	0.224	1	0.00221	0.171	0.426	1	0.00386	0.288	0.351	1	0.221	1	0.15	1	0.0151	0.656	somatic cell DNA recombination	P
GO:0016445	30	0.247	1	0.00852	0.469	0.444	1	0.00711	0.492	0.327	1	0.302	1	0.21	1	0.0376	1	somatic diversification of immunoglobulins	P
GO:0016447	28	0.224	1	0.00221	0.171	0.426	1	0.00386	0.288	0.351	1	0.221	1	0.15	1	0.0151	0.656	somatic recombination of immunoglobulin gene segments	P
GO:0016458	34	0.000263	0.019	3.17e-06	0.00392	0.00111	0.079	2.19e-05	0.00957	0.00279	0.213	0.00878	0.503	0.0187	0.636	0.00016	0.016	gene silencing	P
GO:0016459	58	0.104	1	0.0628	1	0.486	1	0.324	1	0.18	1	0.641	1	0.0468	1	0.000852	0.06	myosin complex	C
GO:0016462	754	6.11e-11	0.00257	5.46e-15	0	1.14e-09	0.00098	1.25e-11	0	3.8e-08	0.000959	5.63e-11	0.00062	0.00116	0.0614	2.92e-06	0.002	pyrophosphatase activity	F
GO:0016469	69	0.049	1	0.21	1	0.148	1	0.482	1	0.0236	1	0.106	1	0.269	1	0.391	1	proton-transporting two-sector ATPase complex	C
GO:0016477	361	0.312	1	0.224	1	0.843	1	0.648	1	0.399	1	0.548	1	0.0561	1	0.00608	0.428	cell migration	P
GO:0016481	335	9.26e-11	0.00257	1.06e-09	0.00089	4.58e-11	0.000708	1.13e-08	0.000893	6.03e-05	0.024	1.98e-05	0.00587	1.56e-06	0.000823	1.69e-06	0.002	negative regulation of transcription	P
GO:0016485	110	0.194	1	0.00678	0.312	0.161	1	0.0425	1	0.115	1	0.0274	1	0.752	1	0.0254	0.999	protein processing	P
GO:0016486	10	0.602	1	0.25	1	0.492	1	0.24	1	0.719	1	0.734	1	0.954	1	0.207	1	peptide hormone processing	P
GO:0016491	978	0.0372	1	0.116	1	0.184	1	0.315	1	0.0569	1	0.0174	0.668	0.132	1	0.382	1	oxidoreductase activity	F
GO:0016493	37	0.634	1	0.721	1	1	1	0.988	1	0.491	1	0.297	1	0.133	1	0.296	1	C-C chemokine receptor activity	F
GO:0016494	33	0.696	1	0.859	1	0.981	1	0.999	1	0.793	1	0.673	1	0.207	1	0.401	1	C-X-C chemokine receptor activity	F
GO:0016500	27	1	1	0.945	1	1	1	0.96	1	0.972	1	0.929	1	0.999	1	0.62	1	protein-hormone receptor activity	F
GO:0016502	139	0.967	1	0.977	1	1	1	0.999	1	0.705	1	0.964	1	0.411	1	0.438	1	nucleotide receptor activity	F
GO:0016503	186	1	1	1	1	1	1	1	1	1	1	1	1	1	1	1	1	pheromone receptor activity	F
GO:0016504	15	0.0319	1	0.0774	1	0.0826	1	0.13	1	0.0355	1	0.0157	0.668	0.191	1	0.44	1	protease activator activity	F
GO:0016525	20	0.859	1	0.599	1	0.995	1	0.643	1	0.533	1	0.401	1	0.652	1	0.617	1	negative regulation of angiogenesis	P
GO:0016528	31	0.117	1	0.135	1	0.196	1	0.175	1	0.127	1	0.145	1	0.338	1	0.363	1	sarcoplasm	C
GO:0016529	28	0.0886	1	0.106	1	0.206	1	0.12	1	0.084	1	0.188	1	0.237	1	0.282	1	sarcoplasmic reticulum	C
GO:0016538	10	0.052	1	0.736	1	0.0168	1	0.287	1	0.0796	1	0.553	1	0.295	1	1	1	cyclin-dependent protein kinase regulator activity	F
GO:0016540	65	0.171	1	0.00427	0.188	0.182	1	0.0601	1	0.112	1	0.0168	0.668	0.515	1	0.0127	0.476	protein autoprocessing	P
GO:0016563	252	3.99e-06	0.00302	2.23e-08	0.000959	4.06e-06	0.00291	1.06e-07	0.00289	0.000437	0.049	0.00011	0.013	0.0119	0.339	0.000125	0.016	transcriptional activator activity	F
GO:0016564	193	1.86e-05	0.007	4.62e-06	0.00451	8.37e-05	0.0116	4.06e-05	0.00957	0.0219	1	0.00681	0.421	0.000222	0.012	4.35e-05	0.007	transcriptional repressor activity	F
GO:0016566	19	0.391	1	0.876	1	0.774	1	0.885	1	0.487	1	0.611	1	0.164	1	0.919	1	specific transcriptional repressor activity	F
GO:0016567	100	4.26e-05	0.00952	7.56e-07	0.00392	4.04e-06	0.00291	1.31e-05	0.00289	0.00719	0.692	1.25e-06	0.002	0.0558	1	0.0274	0.999	protein ubiquitination	P
GO:0016568	192	9.52e-16	0	5.37e-21	0	1.16e-14	0.000708	2.19e-20	0	5.2e-09	0	2.41e-12	0.00062	6.54e-05	0.008	5.76e-09	0	chromatin modification	P
GO:0016569	55	0.000149	0.0143	6.69e-07	0.00392	2.66e-05	0.003	6.85e-07	0.00289	0.0108	0.692	0.000402	0.0233	0.0659	1	0.000593	0.03	covalent chromatin modification	P
GO:0016570	51	0.000824	0.0886	7.47e-06	0.00451	0.000139	0.0116	6.46e-06	0.00289	0.0244	1	0.000767	0.0448	0.178	1	0.00373	0.127	histone modification	P
GO:0016571	18	0.000202	0.0172	7.41e-07	0.00392	0.000113	0.0116	1.13e-05	0.00289	0.00433	0.213	0.000433	0.0233	0.0249	0.838	0.00299	0.127	histone methylation	P
GO:0016573	12	0.15	1	0.0292	1	0.0882	1	0.05	1	0.566	1	0.0695	1	0.655	1	0.0445	1	histone acetylation	P
GO:0016575	12	0.112	1	0.129	1	0.0974	1	0.11	1	0.0247	1	0.18	1	0.63	1	0.369	1	histone deacetylation	P
GO:0016579	11	0.416	1	0.188	1	0.291	1	0.00605	0.288	0.274	1	0.318	1	0.872	1	0.6	1	protein deubiquitination	P
GO:0016581	11	0.0294	1	1.07e-05	0.00451	0.0136	0.653	1.61e-05	0.00957	0.221	1	0.00848	0.503	0.0367	0.838	0.00185	0.079	NuRD complex	C
GO:0016585	24	0.00243	0.212	0.000142	0.015	0.0448	1	4.9e-05	0.0107	0.00828	0.692	0.00981	0.503	0.00726	0.275	0.0113	0.476	chromatin remodeling complex	C
GO:0016591	75	9.76e-06	0.007	0.000345	0.044	3.88e-07	0.002	0.000171	0.013	0.0032	0.213	0.00347	0.151	0.0334	0.838	0.15	1	DNA-directed RNA polymerase II, holoenzyme	C
GO:0016597	16	0.957	1	0.906	1	0.893	1	0.942	1	0.993	1	0.763	1	0.921	1	0.643	1	amino acid binding	F
GO:0016599	17	0.0351	1	0.0233	1	0.0399	1	0.0063	0.333	0.129	1	0.0763	1	0.0516	1	0.213	1	caveolar membrane	C
GO:0016601	19	0.0619	1	0.0843	1	0.349	1	0.043	1	0.0119	0.692	0.109	1	0.139	1	0.741	1	Rac protein signal transduction	P
GO:0016604	125	7.51e-14	0	4.7e-16	0	8.73e-13	0.000708	8.84e-14	0	7e-10	0	5.21e-12	0.00062	0.000102	0.008	0.00101	0.06	nuclear body	C
GO:0016605	24	9.36e-05	0.0143	2.01e-05	0.007	0.000414	0.04	0.000556	0.042	0.00131	0.12	2.51e-05	0.00587	0.0404	1	0.0405	1	PML body	C
GO:0016607	84	2.51e-09	0.00257	8.55e-12	0	7.8e-08	0.00098	1.83e-09	0	3.98e-08	0.000959	2.48e-09	0.000878	0.00136	0.0614	0.00269	0.0832	nuclear speck	C
GO:0016614	149	0.0375	1	0.0338	1	0.101	1	0.0947	1	0.0208	0.79	0.00369	0.18	0.23	1	0.272	1	oxidoreductase activity, acting on CH-OH group of donors	F
GO:0016616	132	0.0289	1	0.0388	1	0.181	1	0.151	1	0.0124	0.692	0.00284	0.144	0.139	1	0.305	1	oxidoreductase activity, acting on the CH-OH group of donors, NAD or NADP as acceptor	F
GO:0016620	55	0.821	1	0.627	1	0.686	1	0.827	1	0.981	1	0.348	1	0.475	1	0.441	1	oxidoreductase activity, acting on the aldehyde or oxo group of donors, NAD or NADP as acceptor	F
GO:0016627	92	0.00615	0.309	0.00654	0.312	0.0143	0.653	0.0277	1	0.0138	0.692	0.00348	0.151	0.0787	1	0.169	1	oxidoreductase activity, acting on the CH-CH group of donors	F
GO:0016628	59	0.11	1	0.0353	1	0.159	1	0.101	1	0.23	1	0.0167	0.668	0.103	1	0.207	1	oxidoreductase activity, acting on the CH-CH group of donors, NAD or NADP as acceptor	F
GO:0016634	10	0.333	1	0.426	1	0.555	1	0.518	1	0.253	1	0.249	1	0.185	1	0.794	1	oxidoreductase activity, acting on the CH-CH group of donors, oxygen as acceptor	F
GO:0016638	22	0.257	1	0.619	1	0.471	1	0.649	1	0.206	1	0.237	1	0.241	1	1	1	oxidoreductase activity, acting on the CH-NH2 group of donors	F
GO:0016641	20	0.42	1	0.781	1	0.669	1	0.817	1	0.29	1	0.243	1	0.392	1	1	1	oxidoreductase activity, acting on the CH-NH2 group of donors, oxygen as acceptor	F
GO:0016645	26	0.0483	1	0.0539	1	0.187	1	0.0428	1	0.0888	1	0.0494	1	0.101	1	0.297	1	oxidoreductase activity, acting on the CH-NH group of donors	F
GO:0016646	16	0.0612	1	0.108	1	0.119	1	0.258	1	0.0891	1	0.0549	1	0.134	1	0.24	1	oxidoreductase activity, acting on the CH-NH group of donors, NAD or NADP as acceptor	F
GO:0016651	69	0.0136	0.608	0.176	1	0.0367	1	0.429	1	0.104	1	0.0961	1	0.0289	0.838	0.332	1	oxidoreductase activity, acting on NADH or NADPH	F
GO:0016655	44	0.121	1	0.49	1	0.194	1	0.64	1	0.204	1	0.33	1	0.267	1	0.526	1	oxidoreductase activity, acting on NADH or NADPH, quinone or similar compound as acceptor	F
GO:0016667	20	0.00363	0.212	0.028	1	0.00668	0.469	0.0632	1	0.0746	1	0.0351	1	0.0289	0.838	0.348	1	oxidoreductase activity, acting on sulfur group of donors	F
GO:0016675	30	0.165	1	0.239	1	0.0887	1	0.0595	1	0.203	1	0.269	1	0.578	1	0.657	1	oxidoreductase activity, acting on heme group of donors	F
GO:0016676	30	0.165	1	0.239	1	0.0887	1	0.0595	1	0.203	1	0.269	1	0.578	1	0.657	1	oxidoreductase activity, acting on heme group of donors, oxygen as acceptor	F
GO:0016679	13	0.0588	1	0.181	1	0.34	1	0.197	1	0.124	1	0.269	1	0.025	0.838	0.237	1	oxidoreductase activity, acting on diphenols and related substances as donors	F
GO:0016681	13	0.0588	1	0.181	1	0.34	1	0.197	1	0.124	1	0.269	1	0.025	0.838	0.237	1	oxidoreductase activity, acting on diphenols and related substances as donors, cytochrome as acceptor	F
GO:0016684	50	0.0352	1	0.116	1	0.0708	1	0.102	1	0.192	1	0.213	1	0.0159	0.488	0.248	1	oxidoreductase activity, acting on peroxide as acceptor	F
GO:0016701	62	0.124	1	0.000705	0.059	0.108	1	0.00216	0.139	0.271	1	0.0108	0.503	0.328	1	0.0614	1	oxidoreductase activity, acting on single donors with incorporation of molecular oxygen	F
GO:0016702	61	0.197	1	0.00102	0.0965	0.165	1	0.00251	0.139	0.398	1	0.0182	0.668	0.357	1	0.054	1	oxidoreductase activity, acting on single donors with incorporation of molecular oxygen, incorporation of two atoms of oxygen	F
GO:0016705	168	0.999	1	1	1	1	1	1	1	0.966	1	0.993	1	0.93	1	0.989	1	oxidoreductase activity, acting on paired donors, with incorporation or reduction of molecular oxygen	F
GO:0016706	24	0.283	1	0.0145	0.607	0.2	1	0.0674	1	0.768	1	0.0027	0.144	0.218	1	0.147	1	oxidoreductase activity, acting on paired donors, with incorporation or reduction of molecular oxygen, 2-oxoglutarate as one donor, and incorporation of one atom each of oxygen into both donors	F
GO:0016709	35	0.837	1	1	1	0.994	1	0.946	1	0.375	1	0.999	1	0.907	1	0.987	1	oxidoreductase activity, acting on paired donors, with incorporation or reduction of molecular oxygen, NAD or NADH as one donor, and incorporation of one atom of oxygen	F
GO:0016712	71	1	1	1	1	1	1	1	1	1	1	1	1	0.999	1	1	1	oxidoreductase activity, acting on paired donors, with incorporation or reduction of molecular oxygen, reduced flavin or flavoprotein as one donor, and incorporation of one atom of oxygen	F
GO:0016740	1983	2.27e-20	0	1.78e-36	0	7.12e-21	0	1.16e-26	0	1.04e-13	0	7.84e-24	0	0.000119	0.008	1.58e-16	0	transferase activity	F
GO:0016741	202	3.4e-05	0.007	6.22e-05	0.007	1.63e-05	0.003	4.07e-05	0.00957	0.000662	0.12	8.74e-05	0.011	0.0858	1	0.218	1	transferase activity, transferring one-carbon groups	F
GO:0016746	209	5.71e-06	0.00362	9.1e-08	0.00392	2.49e-05	0.003	1.35e-05	0.00289	0.000116	0.027	4.47e-06	0.0029	0.0354	0.838	0.00204	0.079	transferase activity, transferring acyl groups	F
GO:0016747	194	3.2e-06	0.00302	3.57e-07	0.00392	2.07e-05	0.003	2.84e-05	0.00957	6.37e-05	0.024	1.69e-05	0.00587	0.0255	0.838	0.00389	0.134	transferase activity, transferring groups other than amino-acyl groups	F
GO:0016755	22	0.508	1	0.152	1	0.384	1	0.298	1	0.554	1	0.0245	1	0.696	1	0.685	1	transferase activity, transferring amino-acyl groups	F
GO:0016757	248	0.101	1	0.0283	1	0.159	1	0.148	1	0.127	1	0.0293	1	0.28	1	0.037	1	transferase activity, transferring glycosyl groups	F
GO:0016758	164	0.45	1	0.319	1	0.472	1	0.467	1	0.362	1	0.185	1	0.607	1	0.348	1	transferase activity, transferring hexosyl groups	F
GO:0016763	47	0.00134	0.0886	0.00318	0.188	0.0148	0.653	0.00707	0.492	0.000815	0.12	0.0253	1	0.141	1	0.0252	0.999	transferase activity, transferring pentosyl groups	F
GO:0016765	61	0.212	1	0.296	1	0.161	1	0.551	1	0.196	1	0.0556	1	0.705	1	0.77	1	transferase activity, transferring alkyl or aryl (other than methyl) groups	F
GO:0016769	34	0.111	1	0.00939	0.469	0.189	1	0.0591	1	0.232	1	0.00647	0.421	0.206	1	0.0303	0.999	transferase activity, transferring nitrogenous groups	F
GO:0016772	1136	8.54e-15	0	4.77e-29	0	9.11e-17	0	7.39e-23	0	3.62e-09	0	8.21e-16	0	0.000748	0.0344	6.86e-15	0	transferase activity, transferring phosphorus-containing groups	F
GO:0016773	836	1.11e-07	0.00257	3.03e-17	0	6.9e-08	0.00098	9.83e-13	0	4.11e-05	0.00633	1.07e-09	0.00062	0.00731	0.275	8.99e-11	0	phosphotransferase activity, alcohol group as acceptor	F
GO:0016775	34	0.615	1	0.391	1	0.72	1	0.438	1	0.51	1	0.736	1	0.635	1	0.115	1	phosphotransferase activity, nitrogenous group as acceptor	F
GO:0016776	34	0.00948	0.608	9.65e-05	0.015	0.0322	1	0.00155	0.096	0.00855	0.692	0.000618	0.032	0.158	1	0.0161	0.656	phosphotransferase activity, phosphate group as acceptor	F
GO:0016779	120	1.63e-05	0.007	0.000214	0.024	8.84e-08	0.002	1.7e-05	0.00957	0.0013	0.12	0.0528	1	0.0451	1	0.0126	0.476	nucleotidyltransferase activity	F
GO:0016780	18	0.207	1	0.123	1	0.0857	1	0.0626	1	0.328	1	0.608	1	0.76	1	0.512	1	phosphotransferase activity, for other substituted phosphate groups	F
GO:0016782	63	1	1	0.796	1	1	1	0.709	1	0.996	1	0.755	1	1	1	0.686	1	transferase activity, transferring sulfur-containing groups	F
GO:0016787	2528	2.54e-15	0	1.04e-22	0	2.32e-12	0.000708	8.94e-16	0	3.01e-11	0	2.74e-14	0.00062	1.38e-05	0.00363	8.29e-14	0	hydrolase activity	F
GO:0016788	691	6.59e-07	0.00276	1.43e-12	0	1.75e-05	0.003	8.89e-09	0.000893	3.6e-05	0.00633	3.73e-06	0.0029	0.00814	0.275	2.09e-09	0	hydrolase activity, acting on ester bonds	F
GO:0016789	132	0.369	1	0.13	1	0.533	1	0.554	1	0.294	1	0.357	1	0.528	1	0.0261	0.999	carboxylic ester hydrolase activity	F
GO:0016790	99	0.156	1	0.000178	0.018	0.0289	1	9.05e-05	0.013	0.264	1	0.00589	0.421	0.831	1	0.00524	0.201	thiolester hydrolase activity	F
GO:0016791	255	3.38e-06	0.00302	8.17e-09	0.00089	5.6e-05	0.00982	1.24e-06	0.00289	0.0026	0.129	7.45e-05	0.011	5.02e-05	0.008	2.27e-05	0.007	phosphoric monoester hydrolase activity	F
GO:0016796	21	0.312	1	0.0493	1	0.212	1	0.1	1	0.329	1	0.0527	1	0.894	1	0.189	1	exonuclease activity, active with either ribo- or deoxyribonucleic acids and producing 5'-phosphomonoesters	F
GO:0016798	139	0.0289	1	0.228	1	0.00777	0.641	0.57	1	0.0253	1	0.08	1	0.403	1	0.332	1	hydrolase activity, acting on glycosyl bonds	F
GO:0016799	19	0.278	1	0.673	1	0.117	1	0.509	1	0.727	1	0.918	1	0.401	1	0.183	1	hydrolase activity, hydrolyzing N-glycosyl compounds	F
GO:0016805	15	0.171	1	0.153	1	0.0784	1	0.0819	1	0.558	1	0.383	1	0.182	1	0.457	1	dipeptidase activity	F
GO:0016806	12	0.215	1	0.255	1	0.21	1	0.191	1	0.528	1	0.243	1	0.112	1	0.424	1	dipeptidyl-peptidase and tripeptidyl-peptidase activity	F
GO:0016810	112	0.000242	0.019	0.0126	0.607	0.00274	0.135	0.0121	0.647	0.00733	0.692	0.127	1	0.000603	0.0344	0.0353	1	hydrolase activity, acting on carbon-nitrogen (but not peptide) bonds	F
GO:0016811	54	0.00444	0.214	0.0034	0.188	0.00422	0.22	0.00195	0.139	0.031	1	0.146	1	0.0529	1	0.0562	1	hydrolase activity, acting on carbon-nitrogen (but not peptide) bonds, in linear amides	F
GO:0016812	10	0.368	1	0.655	1	0.653	1	0.638	1	0.167	1	0.761	1	0.371	1	0.135	1	hydrolase activity, acting on carbon-nitrogen (but not peptide) bonds, in cyclic amides	F
GO:0016813	14	0.0522	1	0.72	1	0.227	1	0.808	1	0.129	1	0.529	1	0.0174	0.488	0.687	1	hydrolase activity, acting on carbon-nitrogen (but not peptide) bonds, in linear amidines	F
GO:0016814	25	0.0454	1	0.0256	1	0.0731	1	0.0292	1	0.0983	1	0.116	1	0.053	1	0.0244	0.999	hydrolase activity, acting on carbon-nitrogen (but not peptide) bonds, in cyclic amidines	F
GO:0016817	760	3.67e-11	0.00257	2.23e-15	0	8.01e-10	0.000795	5.87e-12	0	2.12e-08	0.000959	3.75e-11	0.00062	0.00121	0.0614	1.45e-06	0.002	hydrolase activity, acting on acid anhydrides	F
GO:0016818	759	3.71e-11	0.00257	3.33e-15	0	9.51e-10	0.000795	8.08e-12	0	2.01e-08	0.000959	5.64e-11	0.00062	0.00121	0.0614	1.57e-06	0.002	hydrolase activity, acting on acid anhydrides, in phosphorus-containing anhydrides	F
GO:0016820	137	0.212	1	0.035	1	0.229	1	0.209	1	0.495	1	0.0124	0.503	0.366	1	0.228	1	hydrolase activity, acting on acid anhydrides, catalyzing transmembrane movement of substances	F
GO:0016829	166	0.00556	0.309	0.00179	0.0965	0.0312	1	0.0538	1	0.00576	0.375	0.00367	0.18	0.254	1	0.00901	0.428	lyase activity	F
GO:0016830	47	0.00355	0.212	0.000534	0.0474	0.01	0.653	0.0101	0.572	0.00393	0.213	0.0102	0.503	0.417	1	0.00649	0.428	carbon-carbon lyase activity	F
GO:0016831	33	0.0239	1	0.00257	0.18	0.0173	1	0.00807	0.492	0.0332	1	0.0443	1	0.797	1	0.0119	0.476	carboxy-lyase activity	F
GO:0016835	59	0.144	1	0.336	1	0.194	1	0.761	1	0.16	1	0.15	1	0.454	1	0.456	1	carbon-oxygen lyase activity	F
GO:0016836	49	0.169	1	0.202	1	0.296	1	0.563	1	0.128	1	0.0702	1	0.429	1	0.345	1	hydro-lyase activity	F
GO:0016846	15	0.0699	1	0.17	1	0.0435	1	0.245	1	0.15	1	0.0964	1	0.281	1	0.502	1	carbon-sulfur lyase activity	F
GO:0016849	23	0.475	1	0.509	1	0.937	1	0.598	1	0.277	1	0.768	1	0.163	1	0.184	1	phosphorus-oxygen lyase activity	F
GO:0016853	187	0.000353	0.031	5.45e-05	0.007	0.000765	0.049	5.07e-05	0.0107	0.00602	0.375	0.00904	0.503	0.0336	0.838	0.00297	0.127	isomerase activity	F
GO:0016854	15	0.225	1	0.4	1	0.278	1	0.28	1	0.0843	1	0.577	1	0.426	1	0.555	1	racemase and epimerase activity	F
GO:0016859	39	0.0001	0.0143	0.00784	0.416	0.00842	0.653	0.00452	0.288	0.000534	0.049	0.168	1	0.000729	0.0344	0.0718	1	cis-trans isomerase activity	F
GO:0016860	41	0.414	1	0.0331	1	0.0962	1	0.021	0.937	0.81	1	0.139	1	0.693	1	0.0286	0.999	intramolecular oxidoreductase activity	F
GO:0016863	14	0.916	1	0.828	1	0.659	1	0.766	1	0.933	1	0.826	1	0.998	1	0.591	1	intramolecular oxidoreductase activity, transposing C=C bonds	F
GO:0016866	47	0.182	1	0.0206	1	0.278	1	0.0815	1	0.393	1	0.0425	1	0.108	1	0.0883	1	intramolecular transferase activity	F
GO:0016868	10	0.239	1	0.0199	1	0.375	1	0.0303	1	0.282	1	0.00628	0.421	0.256	1	0.531	1	intramolecular transferase activity, phosphotransferases	F
GO:0016874	424	2.39e-12	0	2.08e-19	0	1.51e-11	0.000708	4.38e-17	0	1.29e-08	0	3.34e-12	0.00062	0.000492	0.0344	8.51e-07	0.002	ligase activity	F
GO:0016875	70	1.01e-05	0.007	7.63e-05	0.015	0.000164	0.0116	6.87e-05	0.013	0.000108	0.027	0.000203	0.0233	0.0253	0.838	0.12	1	ligase activity, forming carbon-oxygen bonds	F
GO:0016876	70	1.01e-05	0.007	7.63e-05	0.015	0.000164	0.0116	6.87e-05	0.013	0.000108	0.027	0.000203	0.0233	0.0253	0.838	0.12	1	ligase activity, forming aminoacyl-tRNA and related compounds	F
GO:0016877	27	0.196	1	0.0566	1	0.394	1	0.122	1	0.515	1	0.271	1	0.0132	0.478	0.0491	1	ligase activity, forming carbon-sulfur bonds	F
GO:0016878	15	0.505	1	0.189	1	0.68	1	0.283	1	0.632	1	0.228	1	0.168	1	0.22	1	acid-thiol ligase activity	F
GO:0016879	241	7.16e-08	0.00257	1.04e-11	0	5.28e-08	0.00098	1.05e-10	0	4.02e-05	0.00633	3.82e-07	0.00165	0.00406	0.223	8.33e-05	0.016	ligase activity, forming carbon-nitrogen bonds	F
GO:0016881	200	6.42e-08	0.00257	4.25e-12	0	4.81e-08	0.00098	2.39e-11	0	1.7e-05	0.00537	1.1e-08	0.000878	0.00656	0.275	0.000614	0.03	acid-amino acid ligase activity	F
GO:0016884	11	0.235	1	0.366	1	0.144	1	0.198	1	0.34	1	0.997	1	0.552	1	0.16	1	carbon-nitrogen ligase activity, with glutamine as amido-N-donor	F
GO:0016887	363	3.27e-05	0.007	8.04e-08	0.00392	2.13e-05	0.003	8.73e-07	0.00289	0.0021	0.12	3.25e-06	0.0029	0.137	1	0.00909	0.428	ATPase activity	F
GO:0016891	21	0.0324	1	0.00997	0.469	0.146	1	0.162	1	0.0854	1	0.0635	1	0.0801	1	0.00339	0.127	endoribonuclease activity, producing 5'-phosphomonoesters	F
GO:0016892	24	0.971	1	0.999	1	0.994	1	1	1	0.713	1	0.513	1	0.939	1	0.996	1	endoribonuclease activity, producing 3'-phosphomonoesters	F
GO:0016893	27	0.0366	1	0.0134	0.607	0.221	1	0.101	1	0.149	1	0.0626	1	0.0266	0.838	0.018	0.656	endonuclease activity, active with either ribo- or deoxyribonucleic acids and producing 5'-phosphomonoesters	F
GO:0016894	26	0.805	1	0.995	1	0.934	1	0.999	1	0.474	1	0.475	1	0.843	1	0.983	1	endonuclease activity, active with either ribo- or deoxyribonucleic acids and producing 3'-phosphomonoesters	F
GO:0016896	13	0.11	1	0.0864	1	0.0542	1	0.249	1	0.25	1	0.0271	1	0.51	1	0.193	1	exoribonuclease activity, producing 5'-phosphomonoesters	F
GO:0016903	65	0.832	1	0.708	1	0.692	1	0.849	1	0.948	1	0.519	1	0.586	1	0.525	1	oxidoreductase activity, acting on the aldehyde or oxo group of donors	F
GO:0016917	78	1	1	1	1	1	1	1	1	1	1	1	1	1	1	1	1	GABA receptor activity	F
GO:0016918	11	0.59	1	0.293	1	0.673	1	0.331	1	0.774	1	0.455	1	0.361	1	0.136	1	retinal binding	F
GO:0016986	22	0.246	1	0.198	1	0.111	1	0.0516	1	0.534	1	0.357	1	0.206	1	0.489	1	transcription initiation factor activity	F
GO:0016998	17	0.797	1	0.451	1	0.91	1	0.801	1	0.431	1	0.117	1	0.952	1	0.853	1	cell wall catabolism	P
GO:0017004	20	0.831	1	0.554	1	0.706	1	0.436	1	0.885	1	0.421	1	0.894	1	0.938	1	cytochrome complex assembly	P
GO:0017015	26	0.0846	1	0.171	1	0.225	1	0.216	1	0.0859	1	0.418	1	0.13	1	0.0697	1	regulation of transforming growth factor beta receptor signaling pathway	P
GO:0017016	58	0.1	1	0.00149	0.0965	0.462	1	0.0147	0.647	0.225	1	0.0194	0.756	0.034	0.838	0.00145	0.06	Ras GTPase binding	F
GO:0017017	13	0.955	1	0.755	1	0.648	1	0.959	1	0.999	1	0.671	1	0.49	1	0.591	1	MAP kinase phosphatase activity	F
GO:0017022	17	0.573	1	0.0564	1	0.82	1	0.0678	1	0.632	1	0.0582	1	0.219	1	0.244	1	myosin binding	F
GO:0017038	100	2.73e-06	0.00302	3.13e-08	0.000959	3.63e-05	0.00982	2.62e-06	0.00289	0.000165	0.049	0.000864	0.0448	0.00551	0.223	3.22e-05	0.007	protein import	P
GO:0017046	12	1	1	0.973	1	1	1	1	1	1	1	0.999	1	0.964	1	0.257	1	peptide hormone binding	F
GO:0017048	24	0.0548	1	0.00881	0.469	0.55	1	0.0631	1	0.0284	1	0.0426	1	0.235	1	0.0189	0.736	Rho GTPase binding	F
GO:0017053	10	0.378	1	0.429	1	0.491	1	0.617	1	0.353	1	0.495	1	0.575	1	0.268	1	transcriptional repressor complex	C
GO:0017076	1987	9.76e-30	0	2.8e-45	0	1.98e-27	0	5.65e-33	0	8.23e-18	0	8.08e-31	0	5.41e-09	0	2.1e-19	0	purine nucleotide binding	F
GO:0017110	10	0.0379	1	0.0115	0.607	0.165	1	0.0206	0.937	0.00853	0.692	0.0968	1	0.112	1	0.295	1	nucleoside-diphosphatase activity	F
GO:0017111	725	6.84e-11	0.00257	5.76e-15	0	5.25e-10	0.000795	1.93e-11	0	4.77e-08	0.000959	2.3e-11	0.00062	0.00196	0.084	4.35e-06	0.00291	nucleoside-triphosphatase activity	F
GO:0017124	26	0.172	1	0.225	1	0.248	1	0.0695	1	0.497	1	0.926	1	0.203	1	0.237	1	SH3 domain binding	F
GO:0017127	10	0.44	1	0.905	1	0.669	1	0.867	1	0.154	1	0.942	1	0.694	1	0.667	1	cholesterol transporter activity	F
GO:0017137	22	0.521	1	0.0182	1	0.635	1	0.171	1	0.818	1	0.024	1	0.0732	1	0.00631	0.428	Rab GTPase binding	F
GO:0017144	12	0.463	1	0.955	1	0.854	1	0.974	1	0.404	1	0.988	1	0.246	1	0.0382	1	drug metabolism	P
GO:0017145	10	0.416	1	0.343	1	0.231	1	0.685	1	0.437	1	0.0947	1	0.802	1	0.602	1	stem cell division	P
GO:0017148	38	0.000676	0.0886	0.000349	0.044	0.00156	0.095	0.0214	0.937	0.0397	1	0.00602	0.421	0.00472	0.223	0.00932	0.428	negative regulation of protein biosynthesis	P
GO:0017153	67	0.815	1	0.631	1	0.916	1	0.887	1	0.821	1	0.531	1	0.529	1	0.338	1	sodium:dicarboxylate symporter activity	F
GO:0017156	23	0.188	1	0.195	1	0.315	1	0.366	1	0.433	1	0.205	1	0.0298	0.838	0.188	1	calcium ion-dependent exocytosis	P
GO:0017157	23	0.203	1	0.00588	0.308	0.223	1	0.0123	0.647	0.447	1	0.0361	1	0.12	1	0.0603	1	regulation of exocytosis	P
GO:0018024	24	0.000125	0.0143	4.96e-08	0.000959	3.42e-05	0.00982	3.87e-06	0.00289	0.00371	0.213	0.000103	0.011	0.0939	1	6.99e-05	0.007	histone-lysine N-methyltransferase activity	F
GO:0018105	18	0.114	1	0.141	1	0.121	1	0.153	1	0.234	1	0.0772	1	0.102	1	0.336	1	peptidyl-serine phosphorylation	P
GO:0018107	10	0.38	1	0.342	1	0.487	1	0.475	1	0.404	1	0.276	1	0.215	1	0.412	1	peptidyl-threonine phosphorylation	P
GO:0018108	75	0.796	1	0.0125	0.607	0.743	1	0.228	1	0.778	1	0.0806	1	0.602	1	0.00052	0.03	peptidyl-tyrosine phosphorylation	P
GO:0018149	14	0.997	1	0.522	1	1	1	0.827	1	0.848	1	0.129	1	0.994	1	0.854	1	peptide cross-linking	P
GO:0018193	147	0.0105	0.608	1.54e-06	0.00392	0.037	1	0.000288	0.042	0.0314	1	0.000591	0.032	0.0251	0.838	1.09e-06	0.002	peptidyl-amino acid modification	P
GO:0018195	10	0.00669	0.315	0.299	1	0.156	1	0.342	1	0.027	1	0.52	1	0.00787	0.275	0.114	1	peptidyl-arginine modification	P
GO:0018209	21	0.196	1	0.107	1	0.203	1	0.198	1	0.375	1	0.159	1	0.111	1	0.128	1	peptidyl-serine modification	P
GO:0018210	13	0.582	1	0.253	1	0.668	1	0.563	1	0.592	1	0.48	1	0.245	1	0.139	1	peptidyl-threonine modification	P
GO:0018212	75	0.796	1	0.0125	0.607	0.743	1	0.228	1	0.778	1	0.0806	1	0.602	1	0.00052	0.03	peptidyl-tyrosine modification	P
GO:0018298	15	0.791	1	0.682	1	0.652	1	0.989	1	0.991	1	0.308	1	0.238	1	0.5	1	protein-chromophore linkage	P
GO:0018342	10	0.844	1	0.617	1	0.866	1	0.466	1	0.473	1	0.763	1	1	1	0.633	1	protein prenylation	P
GO:0018958	83	0.631	1	0.186	1	0.56	1	0.454	1	0.53	1	0.0849	1	0.74	1	0.221	1	phenol metabolism	P
GO:0019001	388	9.97e-07	0.00276	8.67e-09	0.00089	6.12e-05	0.00982	1.11e-06	0.00289	3.1e-06	0.00169	3.91e-07	0.00165	0.00395	0.223	0.000612	0.03	guanyl nucleotide binding	F
GO:0019012	18	0.29	1	0.0958	1	0.203	1	0.0507	1	0.348	1	0.0968	1	0.301	1	0.622	1	virion	C
GO:0019028	17	0.258	1	0.0848	1	0.188	1	0.0456	1	0.304	1	0.0855	1	0.306	1	0.584	1	viral capsid	C
GO:0019048	11	0.242	1	0.348	1	0.393	1	0.669	1	0.493	1	0.391	1	0.135	1	0.249	1	virus-host interaction	P
GO:0019058	18	0.399	1	0.0578	1	0.756	1	0.238	1	0.608	1	0.199	1	0.0731	1	0.0842	1	viral infectious cycle	P
GO:0019098	19	0.997	1	1	1	1	1	1	1	0.835	1	0.983	1	0.948	1	0.776	1	reproductive behavior	P
GO:0019104	10	0.12	1	0.431	1	0.0454	1	0.544	1	0.271	1	0.734	1	0.473	1	0.111	1	DNA N-glycosylase activity	F
GO:0019199	124	0.933	1	0.702	1	0.879	1	0.967	1	0.834	1	0.644	1	0.794	1	0.0742	1	transmembrane receptor protein kinase activity	F
GO:0019200	36	0.00124	0.0886	0.00197	0.13	0.0464	1	0.00338	0.176	0.0127	0.692	0.00911	0.503	0.0174	0.488	0.139	1	carbohydrate kinase activity	F
GO:0019201	17	0.0398	1	0.0233	1	0.0831	1	0.0655	1	0.0431	1	0.0325	1	0.0908	1	0.0702	1	nucleotide kinase activity	F
GO:0019205	42	7.52e-05	0.0141	1.22e-06	0.00392	0.000697	0.049	0.000222	0.013	0.000242	0.049	3.97e-05	0.00966	0.0102	0.275	0.000772	0.06	nucleobase, nucleoside, nucleotide kinase activity	F
GO:0019207	95	0.168	1	0.0129	0.607	0.229	1	0.00946	0.572	0.62	1	0.0667	1	0.0662	1	0.117	1	kinase regulator activity	F
GO:0019208	48	0.0494	1	0.032	1	0.069	1	0.0935	1	0.0463	1	0.112	1	0.165	1	0.0117	0.476	phosphatase regulator activity	F
GO:0019209	17	0.0243	1	0.0108	0.469	0.194	1	0.0287	1	0.12	1	0.0235	1	0.0161	0.488	0.208	1	kinase activator activity	F
GO:0019210	26	0.43	1	0.0188	1	0.209	1	0.0183	0.937	0.925	1	0.0363	1	0.488	1	0.151	1	kinase inhibitor activity	F
GO:0019212	22	0.1	1	0.0282	1	0.202	1	0.0289	1	0.058	1	0.101	1	0.245	1	0.0449	1	phosphatase inhibitor activity	F
GO:0019213	22	0.0103	0.608	0.0349	1	0.0316	1	0.0143	0.647	0.0148	0.692	0.293	1	0.0767	1	0.273	1	deacetylase activity	F
GO:0019216	38	0.038	1	0.00697	0.312	0.128	1	0.0123	0.647	0.154	1	0.00869	0.503	0.0763	1	0.0905	1	regulation of lipid metabolism	P
GO:0019217	13	0.0821	1	0.0102	0.469	0.0234	1	0.0225	0.937	0.143	1	0.0245	1	0.588	1	0.0711	1	regulation of fatty acid metabolism	P
GO:0019218	17	0.239	1	0.308	1	0.575	1	0.447	1	0.373	1	0.17	1	0.084	1	0.641	1	regulation of steroid metabolism	P
GO:0019219	2572	8.02e-27	0	1.61e-36	0	9.5e-27	0	6.84e-36	0	2.66e-19	0	9.18e-26	0	2.54e-06	0.001	1.28e-10	0	regulation of nucleobase, nucleoside, nucleotide and nucleic acid metabolism	P
GO:0019220	125	0.396	1	0.0952	1	0.462	1	0.174	1	0.891	1	0.366	1	0.0362	0.838	0.0367	1	regulation of phosphate metabolism	P
GO:0019221	55	1	1	0.94	1	0.999	1	0.986	1	0.994	1	0.753	1	1	1	0.728	1	cytokine and chemokine mediated signaling pathway	P
GO:0019222	2990	2.1e-33	0	0	0	4.21e-31	0	6.93e-42	0	1.48e-22	0	5.9e-32	0	6.6e-10	0	5.31e-16	0	regulation of metabolism	P
GO:0019226	294	0.766	1	0.545	1	0.967	1	0.949	1	0.758	1	0.209	1	0.195	1	0.065	1	transmission of nerve impulse	P
GO:0019229	15	0.995	1	0.625	1	0.985	1	0.949	1	1	1	0.547	1	0.519	1	0.149	1	regulation of vasoconstriction	P
GO:0019233	33	0.913	1	1	1	0.998	1	1	1	0.804	1	1	1	0.446	1	0.727	1	sensory perception of pain	P
GO:0019236	19	1	1	1	1	1	1	1	1	1	1	1	1	1	1	1	1	response to pheromone	P
GO:0019239	22	0.335	1	0.129	1	0.249	1	0.12	1	0.47	1	0.194	1	0.357	1	0.153	1	deaminase activity	F
GO:0019290	47	0.401	1	0.0496	1	0.353	1	0.265	1	0.45	1	0.0122	0.503	0.556	1	0.133	1	siderophore biosynthesis	P
GO:0019318	188	0.000727	0.0886	5.2e-05	0.007	0.0017	0.095	0.019	0.937	0.027	1	7.2e-07	0.002	0.0169	0.488	0.0446	1	hexose metabolism	P
GO:0019319	29	0.0551	1	0.00414	0.188	0.111	1	0.0153	0.647	0.242	1	0.0872	1	0.0329	0.838	0.0395	1	hexose biosynthesis	P
GO:0019320	75	0.00121	0.0886	5.18e-05	0.007	0.000668	0.049	0.0365	1	0.00571	0.375	1.98e-06	0.002	0.299	1	0.0398	1	hexose catabolism	P
GO:0019321	11	0.0671	1	0.144	1	0.16	1	0.0942	1	0.48	1	0.136	1	0.067	1	0.493	1	pentose metabolism	P
GO:0019362	26	0.000746	0.0886	0.161	1	0.01	0.653	0.482	1	0.0104	0.692	0.0719	1	0.0603	1	0.402	1	pyridine nucleotide metabolism	P
GO:0019363	12	0.0796	1	0.539	1	0.558	1	0.96	1	0.0613	1	0.684	1	0.145	1	0.187	1	pyridine nucleotide biosynthesis	P
GO:0019370	17	0.597	1	0.418	1	0.76	1	0.441	1	0.245	1	0.26	1	0.695	1	0.754	1	leukotriene biosynthesis	P
GO:0019395	25	0.0066	0.315	0.0472	1	0.0142	0.653	0.354	1	0.039	1	0.0412	1	0.314	1	0.244	1	fatty acid oxidation	P
GO:0019438	59	0.407	1	0.0361	1	0.469	1	0.355	1	0.333	1	0.00474	0.266	0.623	1	0.123	1	aromatic compound biosynthesis	P
GO:0019439	15	0.715	1	0.563	1	0.978	1	0.994	1	0.745	1	0.649	1	0.418	1	0.267	1	aromatic compound catabolism	P
GO:0019538	3830	4.96e-43	0	0	0	7.26e-39	0	0	0	1.56e-25	0	2.59e-35	0	5.32e-16	0	9.6e-30	0	protein metabolism	P
GO:0019540	47	0.401	1	0.0496	1	0.353	1	0.265	1	0.45	1	0.0122	0.503	0.556	1	0.133	1	siderophore biosynthesis from catechol	P
GO:0019717	63	0.0671	1	0.0144	0.607	0.0785	1	0.0508	1	0.125	1	0.021	0.756	0.366	1	0.0636	1	synaptosome	C
GO:0019722	33	0.00385	0.212	0.014	0.607	0.0149	0.653	0.152	1	0.0268	1	0.0607	1	0.0104	0.275	0.000755	0.06	calcium-mediated signaling	P
GO:0019724	128	0.685	1	0.844	1	0.722	1	0.278	1	0.977	1	0.992	1	0.246	1	0.763	1	B cell mediated immunity	P
GO:0019725	275	0.00132	0.0886	0.000146	0.015	0.0358	1	0.0029	0.161	0.0665	1	0.00232	0.127	0.000541	0.0344	0.00505	0.201	cell homeostasis	P
GO:0019748	97	0.102	1	0.0961	1	0.0491	1	0.25	1	0.274	1	0.156	1	0.32	1	0.0515	1	secondary metabolism	P
GO:0019751	36	0.00649	0.315	0.0136	0.607	0.014	0.653	0.00488	0.288	0.0253	1	0.115	1	0.132	1	0.213	1	polyol metabolism	P
GO:0019752	642	4.34e-06	0.00302	3.48e-10	0	0.00027	0.04	7.79e-06	0.00289	0.00094	0.12	2.08e-08	0.000878	6.73e-05	0.008	4.18e-06	0.00291	carboxylic acid metabolism	P
GO:0019783	71	0.00955	0.608	4.18e-05	0.007	0.000331	0.04	1.77e-06	0.00289	0.0764	1	0.0151	0.668	0.588	1	0.00318	0.127	small conjugating protein-specific protease activity	F
GO:0019787	178	2.61e-08	0.00257	9.76e-12	0	1.13e-08	0.00098	2.51e-10	0	2.59e-06	0.00169	9.38e-10	0.00062	0.0156	0.488	0.00107	0.06	small conjugating protein ligase activity	F
GO:0019814	10	0.998	1	0.985	1	0.924	1	0.926	1	0.998	1	0.972	1	0.992	1	0.987	1	immunoglobulin complex	C
GO:0019825	18	0.762	1	0.0955	1	0.337	1	0.0391	1	0.99	1	0.206	1	0.566	1	0.365	1	oxygen binding	F
GO:0019827	18	0.0153	1	0.0502	1	0.0106	0.653	0.0604	1	0.129	1	0.133	1	0.214	1	0.301	1	stem cell maintenance	P
GO:0019829	55	0.0357	1	0.081	1	0.0436	1	0.228	1	0.0413	1	0.125	1	0.48	1	0.179	1	cation-transporting ATPase activity	F
GO:0019835	27	0.588	1	0.899	1	0.904	1	0.898	1	0.36	1	0.786	1	0.416	1	0.89	1	cytolysis	P
GO:0019838	89	0.993	1	0.995	1	0.992	1	0.999	1	0.898	1	0.961	1	0.988	1	0.783	1	growth factor binding	F
GO:0019840	17	0.888	1	0.385	1	0.97	1	0.388	1	0.972	1	0.626	1	0.433	1	0.153	1	isoprenoid binding	F
GO:0019841	11	0.534	1	0.238	1	0.762	1	0.171	1	0.756	1	0.502	1	0.235	1	0.164	1	retinol binding	F
GO:0019842	148	0.00546	0.309	0.0147	0.607	0.0482	1	0.0153	0.647	0.0536	1	0.0146	0.668	0.0069	0.275	0.402	1	vitamin binding	F
GO:0019843	21	8.47e-06	0.00362	0.000265	0.044	2.84e-05	0.003	3.15e-06	0.00289	2.91e-05	0.00633	0.00212	0.127	0.0824	1	0.728	1	rRNA binding	F
GO:0019861	91	0.826	1	0.32	1	0.794	1	0.581	1	0.694	1	0.582	1	0.799	1	0.0803	1	flagellum	C
GO:0019865	11	0.303	1	0.129	1	0.199	1	0.156	1	0.968	1	0.257	1	0.15	1	0.117	1	immunoglobulin binding	F
GO:0019866	334	1.28e-09	0.00257	2.86e-09	0.00089	2.8e-07	0.002	1.76e-07	0.00289	1.22e-08	0	1.08e-06	0.002	0.000885	0.0344	0.000297	0.03	organelle inner membrane	C
GO:0019867	81	0.00138	0.0886	6.43e-07	0.00392	0.0242	1	0.000113	0.013	0.00576	0.375	9.52e-05	0.011	0.00271	0.084	0.00144	0.06	outer membrane	C
GO:0019882	83	0.445	1	0.815	1	0.271	1	0.442	1	0.334	1	0.138	1	0.607	1	1	1	antigen processing and presentation	P
GO:0019884	24	0.0507	1	0.138	1	0.113	1	0.0847	1	0.129	1	0.101	1	0.186	1	0.842	1	antigen processing and presentation of exogenous antigen	P
GO:0019886	16	0.0293	1	0.0809	1	0.152	1	0.114	1	0.19	1	0.0631	1	0.0699	1	0.658	1	antigen processing and presentation of exogenous peptide antigen via MHC class II	P
GO:0019887	75	0.166	1	0.0225	1	0.151	1	0.0157	0.647	0.678	1	0.0902	1	0.106	1	0.183	1	protein kinase regulator activity	F
GO:0019888	45	0.0381	1	0.0204	1	0.0645	1	0.0678	1	0.0393	1	0.0628	1	0.115	1	0.0145	0.476	protein phosphatase regulator activity	F
GO:0019897	60	0.1	1	0.0341	1	0.237	1	0.23	1	0.319	1	0.116	1	0.0591	1	0.00384	0.134	extrinsic to plasma membrane	C
GO:0019898	93	0.0843	1	0.00924	0.469	0.492	1	0.282	1	0.362	1	0.102	1	0.00896	0.275	0.000359	0.03	extrinsic to membrane	C
GO:0019899	251	3.78e-06	0.00302	7.94e-11	0	0.00198	0.095	5.47e-10	0	0.00346	0.213	1.17e-06	0.002	1.53e-06	0.000823	8.84e-05	0.016	enzyme binding	F
GO:0019900	96	0.0155	1	0.000476	0.0474	0.151	1	0.000399	0.042	0.114	1	0.00251	0.127	0.00214	0.084	0.102	1	kinase binding	F
GO:0019901	80	0.0126	0.608	0.00134	0.0965	0.129	1	0.00131	0.094	0.064	1	0.00237	0.127	0.00607	0.275	0.252	1	protein kinase binding	F
GO:0019902	16	0.11	1	0.0114	0.607	0.00344	0.203	0.0147	0.647	0.323	1	0.0754	1	0.592	1	0.025	0.999	phosphatase binding	F
GO:0019903	12	0.0884	1	0.0279	1	0.00858	0.653	0.0166	0.647	0.22	1	0.132	1	0.498	1	0.0755	1	protein phosphatase binding	F
GO:0019904	142	3.73e-06	0.00302	1.06e-05	0.00451	2.43e-05	0.003	6.43e-05	0.013	0.00125	0.12	0.000512	0.032	0.000108	0.008	0.0139	0.476	protein domain specific binding	F
GO:0019905	26	0.218	1	0.588	1	0.924	1	0.819	1	0.248	1	0.78	1	0.0506	1	0.17	1	syntaxin binding	F
GO:0019915	12	0.166	1	0.0253	1	0.33	1	0.102	1	0.245	1	0.0776	1	0.196	1	0.106	1	sequestering of lipid	P
GO:0019932	161	0.0628	1	0.0328	1	0.275	1	0.345	1	0.0946	1	0.113	1	0.028	0.838	0.000504	0.03	second-messenger-mediated signaling	P
GO:0019933	69	0.737	1	0.705	1	0.935	1	0.932	1	0.641	1	0.597	1	0.279	1	0.235	1	cAMP-mediated signaling	P
GO:0019935	74	0.64	1	0.6	1	0.913	1	0.892	1	0.501	1	0.53	1	0.299	1	0.193	1	cyclic-nucleotide-mediated signaling	P
GO:0019941	162	3.22e-05	0.007	6.72e-10	0.00089	6.13e-07	0.002	2.31e-10	0	0.00545	0.375	3.59e-06	0.0029	0.169	1	0.000372	0.03	modification-dependent protein catabolism	P
GO:0019953	364	0.000251	0.019	0.000636	0.059	0.000302	0.04	0.00381	0.288	0.0184	0.79	0.00342	0.151	0.00441	0.223	0.0353	1	sexual reproduction	P
GO:0019955	111	0.971	1	0.999	1	1	1	1	1	0.939	1	0.974	1	0.52	1	0.648	1	cytokine binding	F
GO:0019956	50	0.739	1	0.793	1	0.998	1	0.998	1	0.599	1	0.47	1	0.157	1	0.36	1	chemokine binding	F
GO:0019957	37	0.634	1	0.721	1	1	1	0.988	1	0.491	1	0.297	1	0.133	1	0.296	1	C-C chemokine binding	F
GO:0019958	34	0.729	1	0.899	1	0.989	1	1	1	0.777	1	0.729	1	0.223	1	0.463	1	C-X-C chemokine binding	F
GO:0019959	11	0.0929	1	0.129	1	0.889	1	0.855	1	0.408	1	0.157	1	0.0213	0.636	0.0284	0.999	interleukin-8 binding	F
GO:0019965	58	0.995	1	0.999	1	1	1	1	1	0.999	1	0.985	1	0.578	1	0.739	1	interleukin binding	F
GO:0019966	30	1	1	1	1	1	1	1	1	1	1	1	1	1	1	1	1	interleukin-1 binding	F
GO:0019992	55	0.364	1	0.0683	1	0.224	1	0.163	1	0.84	1	0.279	1	0.0614	1	0.0742	1	diacylglycerol binding	F
GO:0020037	203	1	1	1	1	1	1	1	1	1	1	0.994	1	0.87	1	0.695	1	heme binding	F
GO:0021510	37	0.156	1	0.882	1	0.389	1	0.942	1	0.214	1	0.809	1	0.0539	1	0.602	1	spinal cord development	P
GO:0021515	25	0.333	1	0.985	1	0.573	1	0.993	1	0.53	1	0.991	1	0.106	1	0.701	1	cell differentiation in spinal cord	P
GO:0021516	11	0.557	1	1	1	0.876	1	0.994	1	0.704	1	0.992	1	0.128	1	0.982	1	dorsal spinal cord development	P
GO:0021517	17	0.225	1	0.907	1	0.435	1	0.964	1	0.343	1	0.945	1	0.105	1	0.601	1	ventral spinal cord development	P
GO:0021522	15	0.223	1	0.95	1	0.461	1	0.992	1	0.282	1	0.993	1	0.113	1	0.549	1	spinal cord motor neuron differentiation	P
GO:0021532	13	0.151	1	0.483	1	0.407	1	0.528	1	0.339	1	0.436	1	0.0833	1	0.516	1	neural tube patterning	P
GO:0021533	14	0.14	1	0.572	1	0.251	1	0.596	1	0.229	1	0.412	1	0.132	1	0.413	1	cell differentiation in hindbrain	P
GO:0021534	10	0.394	1	0.964	1	0.995	1	0.98	1	0.216	1	0.948	1	0.25	1	0.574	1	cell proliferation in hindbrain	P
GO:0021536	30	0.941	1	0.92	1	0.963	1	0.99	1	0.966	1	0.741	1	0.452	1	0.779	1	diencephalon development	P
GO:0021537	53	0.382	1	0.43	1	0.335	1	0.399	1	0.42	1	0.522	1	0.485	1	0.457	1	telencephalon development	P
GO:0021543	38	0.446	1	0.207	1	0.452	1	0.236	1	0.311	1	0.286	1	0.679	1	0.3	1	pallium development	P
GO:0021545	13	0.961	1	0.865	1	0.888	1	0.704	1	0.991	1	0.847	1	0.817	1	0.982	1	cranial nerve development	P
GO:0021549	26	0.19	1	0.79	1	0.611	1	0.736	1	0.23	1	0.581	1	0.0716	1	0.68	1	cerebellum development	P
GO:0021575	19	0.0456	1	0.516	1	0.419	1	0.543	1	0.0658	1	0.37	1	0.026	0.838	0.384	1	hindbrain morphogenesis	P
GO:0021587	18	0.0384	1	0.452	1	0.355	1	0.464	1	0.0441	1	0.354	1	0.0385	0.854	0.353	1	cerebellum morphogenesis	P
GO:0021675	19	0.938	1	0.814	1	0.873	1	0.595	1	0.941	1	0.852	1	0.852	1	0.938	1	nerve development	P
GO:0021680	11	0.364	1	0.389	1	0.59	1	0.332	1	0.612	1	0.329	1	0.183	1	0.431	1	cerebellar Purkinje cell layer development	P
GO:0021695	20	0.0608	1	0.503	1	0.314	1	0.412	1	0.0873	1	0.356	1	0.0688	1	0.517	1	cerebellar cortex development	P
GO:0021696	17	0.0192	1	0.371	1	0.278	1	0.404	1	0.0274	1	0.281	1	0.0309	0.838	0.309	1	cerebellar cortex morphogenesis	P
GO:0021697	13	0.0817	1	0.481	1	0.257	1	0.467	1	0.0785	1	0.381	1	0.0998	1	0.369	1	cerebellar cortex formation	P
GO:0021700	92	0.0671	1	0.0995	1	0.0988	1	0.721	1	0.567	1	0.168	1	0.0368	0.838	0.0219	0.999	developmental maturation	P
GO:0021761	20	0.251	1	0.0723	1	0.291	1	0.0619	1	0.281	1	0.305	1	0.275	1	0.102	1	limbic system development	P
GO:0021766	16	0.14	1	0.037	1	0.232	1	0.0706	1	0.14	1	0.158	1	0.189	1	0.044	1	hippocampus development	P
GO:0021782	17	0.661	1	0.637	1	0.446	1	0.589	1	0.729	1	0.456	1	0.657	1	0.852	1	glial cell development	P
GO:0021795	14	0.712	1	0.524	1	0.831	1	0.403	1	0.823	1	0.757	1	0.339	1	0.51	1	cerebral cortex cell migration	P
GO:0021846	12	0.919	1	0.876	1	0.692	1	0.947	1	0.789	1	0.71	1	1	1	0.789	1	cell proliferation in the forebrain	P
GO:0021872	13	0.773	1	0.71	1	0.617	1	0.754	1	0.716	1	0.48	1	0.99	1	0.911	1	generation of neurons in the forebrain	P
GO:0021879	11	0.811	1	0.663	1	0.652	1	0.633	1	0.893	1	0.519	1	0.98	1	0.85	1	forebrain neuron differentiation	P
GO:0021885	17	0.878	1	0.72	1	0.931	1	0.592	1	0.963	1	0.887	1	0.379	1	0.655	1	forebrain cell migration	P
GO:0021895	13	0.256	1	0.457	1	0.212	1	0.471	1	0.525	1	0.316	1	0.351	1	0.81	1	cerebral cortex neuron differentiation	P
GO:0021915	62	0.138	1	0.0451	1	0.405	1	0.0873	1	0.0586	1	0.113	1	0.16	1	0.0311	0.999	neural tube development	P
GO:0021924	10	0.394	1	0.964	1	0.995	1	0.98	1	0.216	1	0.948	1	0.25	1	0.574	1	cell proliferation in the external granule layer	P
GO:0021930	10	0.394	1	0.964	1	0.995	1	0.98	1	0.216	1	0.948	1	0.25	1	0.574	1	granule cell precursor proliferation	P
GO:0021953	34	0.152	1	0.469	1	0.34	1	0.444	1	0.284	1	0.534	1	0.0582	1	0.436	1	central nervous system neuron differentiation	P
GO:0021954	30	0.175	1	0.451	1	0.205	1	0.387	1	0.396	1	0.519	1	0.0784	1	0.524	1	central nervous system neuron development	P
GO:0021955	14	0.0682	1	0.139	1	0.0575	1	0.165	1	0.155	1	0.353	1	0.0532	1	0.0934	1	central nervous system neuron axonogenesis	P
GO:0021983	24	0.956	1	0.897	1	0.951	1	0.996	1	0.996	1	0.587	1	0.439	1	0.766	1	pituitary gland development	P
GO:0021987	29	0.307	1	0.161	1	0.305	1	0.218	1	0.3	1	0.172	1	0.408	1	0.287	1	cerebral cortex development	P
GO:0022008	438	0.113	1	0.305	1	0.592	1	0.601	1	0.158	1	0.556	1	0.0308	0.838	0.0417	1	neurogenesis	P
GO:0022029	16	0.808	1	0.667	1	0.889	1	0.524	1	0.934	1	0.841	1	0.302	1	0.666	1	telencephalon cell migration	P
GO:0022037	31	0.0899	1	0.847	1	0.38	1	0.743	1	0.117	1	0.554	1	0.0418	1	0.836	1	metencephalon development	P
GO:0030001	604	0.235	1	0.00564	0.308	0.642	1	0.125	1	0.596	1	0.0365	1	0.0354	0.838	0.00156	0.06	metal ion transport	P
GO:0030003	156	0.0318	1	0.0121	0.607	0.426	1	0.0518	1	0.25	1	0.0489	1	0.00262	0.084	0.0233	0.999	cation homeostasis	P
GO:0030004	18	0.0769	1	0.0654	1	0.261	1	0.059	1	0.0505	1	0.122	1	0.221	1	0.242	1	monovalent inorganic cation homeostasis	P
GO:0030005	138	0.112	1	0.036	1	0.525	1	0.131	1	0.477	1	0.101	1	0.0102	0.275	0.0278	0.999	di-, tri-valent inorganic cation homeostasis	P
GO:0030010	13	0.335	1	0.055	1	0.202	1	0.0954	1	0.711	1	0.109	1	0.266	1	0.185	1	establishment of cell polarity	P
GO:0030016	83	0.314	1	0.0695	1	0.668	1	0.234	1	0.234	1	0.272	1	0.453	1	0.0141	0.476	myofibril	C
GO:0030017	74	0.306	1	0.0718	1	0.517	1	0.168	1	0.217	1	0.292	1	0.654	1	0.0276	0.999	sarcomere	C
GO:0030018	36	0.302	1	0.22	1	0.212	1	0.234	1	0.246	1	0.547	1	0.714	1	0.132	1	Z disc	C
GO:0030027	56	0.0155	1	0.0018	0.0965	0.0344	1	0.022	0.937	0.0484	1	0.00294	0.144	0.0436	1	0.00599	0.428	lamellipodium	C
GO:0030029	231	2.08e-05	0.007	1.56e-09	0.00089	0.0139	0.653	0.00015	0.013	0.0166	0.692	3.18e-05	0.00952	1.66e-06	0.000823	1.6e-10	0	actin filament-based process	P
GO:0030030	334	0.0511	1	0.0102	0.469	0.309	1	0.245	1	0.059	1	0.0475	1	0.0804	1	0.000523	0.03	cell projection organization and biogenesis	P
GO:0030031	82	0.00112	0.0886	2.38e-05	0.007	0.0114	0.653	0.00281	0.161	0.00663	0.692	0.000264	0.0233	0.0217	0.636	7.07e-05	0.007	cell projection biogenesis	P
GO:0030032	18	0.0607	1	0.0013	0.0965	0.113	1	0.00172	0.124	0.0355	1	0.0063	0.421	0.393	1	0.00344	0.127	lamellipodium biogenesis	P
GO:0030035	15	0.0327	1	0.0798	1	0.365	1	0.135	1	0.105	1	0.296	1	0.014	0.478	0.0185	0.736	microspike biogenesis	P
GO:0030036	210	2.82e-05	0.007	6.59e-09	0.00089	0.013	0.653	0.000128	0.013	0.0157	0.692	5.49e-05	0.00966	9.46e-06	0.00294	5.81e-09	0	actin cytoskeleton organization and biogenesis	P
GO:0030041	37	0.0305	1	0.00822	0.416	0.122	1	0.0583	1	0.246	1	0.202	1	0.0167	0.488	0.000745	0.06	actin filament polymerization	P
GO:0030042	23	0.114	1	0.00306	0.188	0.429	1	0.0537	1	0.244	1	0.0376	1	0.0837	1	0.0103	0.476	actin filament depolymerization	P
GO:0030048	16	0.209	1	0.00551	0.308	0.192	1	0.105	1	0.262	1	0.0115	0.503	0.244	1	0.00185	0.079	actin filament-based movement	P
GO:0030054	474	0.0783	1	0.023	1	0.821	1	0.61	1	0.193	1	0.108	1	0.00181	0.084	8.83e-06	0.007	cell junction	C
GO:0030055	49	0.0403	1	0.0358	1	0.442	1	0.194	1	0.0206	0.79	0.0903	1	0.0218	0.636	0.0051	0.201	cell-matrix junction	C
GO:0030057	16	0.568	1	0.558	1	0.638	1	0.734	1	0.785	1	0.434	1	0.444	1	0.289	1	desmosome	C
GO:0030072	47	0.213	1	0.164	1	0.378	1	0.47	1	0.43	1	0.276	1	0.0339	0.838	0.0261	0.999	peptide hormone secretion	P
GO:0030073	41	0.155	1	0.176	1	0.247	1	0.448	1	0.29	1	0.383	1	0.0555	1	0.0195	0.736	insulin secretion	P
GO:0030097	273	0.00426	0.214	0.0247	1	0.000828	0.049	0.0373	1	0.69	1	0.377	1	0.000777	0.0344	0.0197	0.736	hemopoiesis	P
GO:0030098	118	0.0808	1	0.0286	1	0.125	1	0.116	1	0.733	1	0.4	1	0.00854	0.275	0.00581	0.428	lymphocyte differentiation	P
GO:0030099	130	0.00931	0.608	0.233	1	0.00265	0.107	0.103	1	0.743	1	0.578	1	0.00118	0.0614	0.357	1	myeloid cell differentiation	P
GO:0030100	48	0.686	1	0.0868	1	0.449	1	0.159	1	0.898	1	0.186	1	0.57	1	0.101	1	regulation of endocytosis	P
GO:0030101	12	0.68	1	0.372	1	0.597	1	0.36	1	0.65	1	0.415	1	0.734	1	0.47	1	natural killer cell activation	P
GO:0030111	28	0.0632	1	0.157	1	0.259	1	0.285	1	0.0489	1	0.333	1	0.152	1	0.0821	1	regulation of Wnt receptor signaling pathway	P
GO:0030117	61	2.62e-06	0.00302	3.59e-08	0.000959	9.97e-05	0.0116	1.12e-08	0.000893	0.00274	0.213	1.11e-05	0.00587	0.000486	0.0344	0.011	0.476	membrane coat	C
GO:0030118	39	0.000524	0.044	1.07e-05	0.00451	0.00135	0.079	4.73e-05	0.0107	0.0508	1	0.000205	0.0233	0.00307	0.0878	0.0396	1	clathrin coat	C
GO:0030119	28	0.00184	0.212	0.000426	0.0474	0.00621	0.469	0.000583	0.042	0.167	1	0.00213	0.127	0.00205	0.084	0.187	1	membrane coat adaptor complex	C
GO:0030120	30	0.000374	0.031	1.78e-05	0.00451	0.00623	0.469	0.000203	0.013	0.0198	0.79	6e-06	0.00587	0.0193	0.636	0.0149	0.656	vesicle coat	C
GO:0030125	16	0.00671	0.315	0.000709	0.059	0.00955	0.653	0.0337	1	0.104	1	3.7e-05	0.00966	0.048	1	0.0419	1	clathrin vesicle coat	C
GO:0030131	28	0.00184	0.212	0.000426	0.0474	0.00621	0.469	0.000583	0.042	0.167	1	0.00213	0.127	0.00205	0.084	0.187	1	clathrin adaptor complex	C
GO:0030133	41	0.00367	0.212	0.00332	0.188	0.0308	1	0.0136	0.647	0.0123	0.692	0.0235	1	0.0288	0.838	0.0331	1	transport vesicle	C
GO:0030135	120	0.00242	0.212	9.65e-06	0.00451	0.0256	1	0.000816	0.069	0.0603	1	6.33e-05	0.00966	0.00252	0.084	0.000828	0.06	coated vesicle	C
GO:0030136	103	0.0162	1	0.000515	0.0474	0.047	1	0.0278	1	0.175	1	0.00085	0.0448	0.00918	0.275	0.00486	0.201	clathrin-coated vesicle	C
GO:0030137	11	0.00193	0.212	0.00014	0.015	0.111	1	2.86e-06	0.00289	0.0089	0.692	0.0028	0.144	0.0062	0.275	0.0149	0.656	COPI-coated vesicle	C
GO:0030139	22	0.127	1	0.0316	1	0.055	1	0.0481	1	0.638	1	0.131	1	0.0573	1	0.0225	0.999	endocytic vesicle	C
GO:0030140	19	0.0158	1	0.0175	0.763	0.0531	1	0.0931	1	0.068	1	0.0274	1	0.0471	1	0.0566	1	trans-Golgi network transport vesicle	C
GO:0030141	56	0.0297	1	0.0107	0.469	0.0721	1	0.0415	1	0.0484	1	0.0343	1	0.169	1	0.0295	0.999	secretory granule	C
GO:0030145	140	0.0103	0.608	0.000169	0.015	0.00623	0.469	0.000858	0.069	0.425	1	0.0503	1	0.0458	1	0.000111	0.016	manganese ion binding	F
GO:0030148	20	0.0251	1	0.00916	0.469	0.0741	1	0.446	1	0.209	1	0.00159	0.122	0.0304	0.838	0.102	1	sphingolipid biosynthesis	P
GO:0030149	11	0.00217	0.212	0.0343	1	0.00911	0.653	0.0879	1	0.00878	0.692	0.00585	0.421	0.0287	0.838	0.265	1	sphingolipid catabolism	P
GO:0030154	1418	9.25e-07	0.00276	0.000234	0.024	9.77e-05	0.0116	0.0076	0.492	0.0205	0.79	0.0446	1	1.09e-07	0	6.4e-05	0.007	cell differentiation	P
GO:0030155	65	0.218	1	0.266	1	0.563	1	0.53	1	0.214	1	0.143	1	0.0933	1	0.377	1	regulation of cell adhesion	P
GO:0030162	15	0.322	1	0.402	1	0.16	1	0.446	1	0.174	1	0.545	1	0.802	1	0.348	1	regulation of proteolysis	P
GO:0030163	228	1.79e-08	0.00257	4.88e-11	0	1.15e-08	0.00098	8.76e-12	0	6.53e-05	0.024	1.39e-05	0.00587	0.0198	0.636	1.73e-05	0.007	protein catabolism	P
GO:0030165	29	0.467	1	0.317	1	0.817	1	0.187	1	0.339	1	0.377	1	0.307	1	0.54	1	PDZ domain binding	F
GO:0030166	22	0.927	1	0.905	1	1	1	0.499	1	0.914	1	1	1	0.235	1	0.363	1	proteoglycan biosynthesis	P
GO:0030168	16	0.252	1	0.235	1	0.258	1	0.201	1	0.603	1	0.555	1	0.12	1	0.184	1	platelet activation	P
GO:0030169	14	0.114	1	0.147	1	0.247	1	0.168	1	0.166	1	0.691	1	0.0906	1	0.111	1	low-density lipoprotein binding	F
GO:0030170	63	0.0668	1	0.0947	1	0.116	1	0.13	1	0.153	1	0.0417	1	0.0998	1	0.529	1	pyridoxal phosphate binding	F
GO:0030173	32	0.163	1	0.195	1	0.25	1	0.544	1	0.227	1	0.169	1	0.053	1	0.149	1	integral to Golgi membrane	C
GO:0030175	18	0.271	1	0.0695	1	0.455	1	0.111	1	0.558	1	0.116	1	0.0603	1	0.0498	1	filopodium	C
GO:0030176	33	0.043	1	0.000301	0.044	0.0764	1	0.00274	0.161	0.104	1	0.0015	0.093	0.0418	1	0.0243	0.999	integral to endoplasmic reticulum membrane	C
GO:0030178	20	0.105	1	0.113	1	0.521	1	0.429	1	0.0735	1	0.182	1	0.217	1	0.0605	1	negative regulation of Wnt receptor signaling pathway	P
GO:0030182	358	0.42	1	0.614	1	0.903	1	0.781	1	0.349	1	0.868	1	0.157	1	0.0946	1	neuron differentiation	P
GO:0030183	55	0.709	1	0.506	1	0.826	1	0.522	1	0.946	1	0.932	1	0.253	1	0.146	1	B cell differentiation	P
GO:0030193	13	0.308	1	0.388	1	0.267	1	0.819	1	0.271	1	0.378	1	0.476	1	0.245	1	regulation of blood coagulation	P
GO:0030198	83	0.732	1	0.239	1	0.921	1	0.781	1	0.962	1	0.443	1	0.176	1	0.0128	0.476	extracellular matrix organization and biogenesis	P
GO:0030199	14	0.534	1	0.479	1	0.974	1	0.78	1	0.403	1	0.47	1	0.298	1	0.12	1	collagen fibril organization	P
GO:0030203	31	0.0734	1	0.291	1	0.512	1	0.0454	1	0.067	1	0.361	1	0.0946	1	0.831	1	glycosaminoglycan metabolism	P
GO:0030216	37	0.854	1	0.507	1	0.761	1	0.575	1	0.938	1	0.38	1	0.812	1	0.432	1	keratinocyte differentiation	P
GO:0030217	72	0.0116	0.608	0.0103	0.469	0.0694	1	0.108	1	0.165	1	0.135	1	0.000659	0.0344	0.0094	0.428	T cell differentiation	P
GO:0030218	52	0.0244	1	0.104	1	0.0185	1	0.0369	1	0.73	1	0.449	1	0.00386	0.223	0.115	1	erythrocyte differentiation	P
GO:0030225	12	0.216	1	0.452	1	0.22	1	0.366	1	0.252	1	0.302	1	0.487	1	0.98	1	macrophage differentiation	P
GO:0030234	830	0.0153	1	6.65e-06	0.00451	0.129	1	0.00014	0.013	0.285	1	4.25e-05	0.00966	0.00114	0.0614	0.00206	0.079	enzyme regulator activity	F
GO:0030238	12	0.888	1	0.447	1	0.812	1	0.858	1	0.993	1	0.513	1	0.357	1	0.12	1	male sex determination	P
GO:0030239	18	0.136	1	0.158	1	0.268	1	0.298	1	0.528	1	0.155	1	0.0489	1	0.206	1	myofibril assembly	P
GO:0030246	345	1	1	0.992	1	1	1	1	1	1	1	0.991	1	0.997	1	0.44	1	carbohydrate binding	F
GO:0030247	95	0.919	1	0.819	1	0.862	1	0.953	1	0.845	1	0.838	1	0.951	1	0.301	1	polysaccharide binding	F
GO:0030258	37	0.0525	1	0.00778	0.416	0.0703	1	0.0108	0.572	0.0736	1	0.0352	1	0.327	1	0.0532	1	lipid modification	P
GO:0030261	24	0.006	0.309	1.2e-06	0.00392	0.000798	0.049	6.58e-09	0.000893	0.0953	1	0.0169	0.668	0.168	1	0.00417	0.201	chromosome condensation	P
GO:0030262	17	0.000672	0.0886	0.000428	0.0474	0.00125	0.079	1.21e-05	0.00289	0.00242	0.12	0.00766	0.421	0.0487	1	0.309	1	apoptotic nuclear changes	P
GO:0030278	39	0.359	1	0.885	1	0.665	1	0.991	1	0.341	1	0.541	1	0.228	1	0.682	1	regulation of ossification	P
GO:0030279	13	0.408	1	0.629	1	0.603	1	0.86	1	0.859	1	0.543	1	0.172	1	0.16	1	negative regulation of ossification	P
GO:0030282	37	0.203	1	0.554	1	0.515	1	0.842	1	0.195	1	0.211	1	0.0847	1	0.667	1	bone mineralization	P
GO:0030286	37	0.425	1	0.109	1	0.536	1	0.262	1	0.458	1	0.479	1	0.323	1	0.162	1	dynein complex	C
GO:0030288	22	0.964	1	0.999	1	0.994	1	0.992	1	0.853	1	1	1	0.808	1	0.673	1	periplasmic space (sensu Proteobacteria)	C
GO:0030295	11	0.059	1	0.00256	0.18	0.23	1	0.0125	0.647	0.2	1	0.021	0.756	0.0824	1	0.203	1	protein kinase activator activity	F
GO:0030301	15	0.309	1	0.551	1	0.336	1	0.538	1	0.592	1	0.619	1	0.123	1	0.419	1	cholesterol transport	P
GO:0030308	48	0.00536	0.309	0.00629	0.308	0.00501	0.308	0.0217	0.937	0.184	1	0.0913	1	0.0271	0.838	0.0045	0.201	negative regulation of cell growth	P
GO:0030312	26	0.963	1	0.933	1	0.994	1	0.964	1	0.893	1	0.991	1	0.819	1	0.347	1	external encapsulating structure	C
GO:0030313	24	0.968	1	0.988	1	0.994	1	0.995	1	0.844	1	0.999	1	0.842	1	0.408	1	cell envelope	C
GO:0030315	18	0.82	1	0.834	1	0.9	1	0.787	1	0.989	1	0.773	1	0.275	1	0.866	1	T-tubule	C
GO:0030316	21	0.544	1	0.716	1	0.261	1	0.812	1	0.894	1	0.485	1	0.504	1	0.918	1	osteoclast differentiation	P
GO:0030317	30	0.752	1	0.798	1	0.597	1	0.895	1	0.765	1	0.809	1	0.91	1	0.624	1	sperm motility	P
GO:0030318	19	0.272	1	0.659	1	0.224	1	0.622	1	0.279	1	0.627	1	0.344	1	0.579	1	melanocyte differentiation	P
GO:0030321	10	0.962	1	0.986	1	0.907	1	0.992	1	1	1	1	1	0.33	1	0.414	1	transepithelial chloride transport	P
GO:0030323	94	0.477	1	0.521	1	0.322	1	0.502	1	0.78	1	0.723	1	0.243	1	0.186	1	respiratory tube development	P
GO:0030324	92	0.463	1	0.506	1	0.316	1	0.481	1	0.771	1	0.74	1	0.219	1	0.147	1	lung development	P
GO:0030325	10	1	1	0.938	1	1	1	0.942	1	0.948	1	0.915	1	1	1	0.752	1	adrenal gland development	P
GO:0030326	85	0.815	1	0.971	1	0.818	1	0.982	1	0.846	1	0.976	1	0.59	1	0.658	1	embryonic limb morphogenesis	P
GO:0030330	17	0.0591	1	0.0126	0.607	0.0235	1	0.0616	1	0.0591	1	0.0481	1	0.504	1	0.0453	1	DNA damage response, signal transduction by p53 class mediator	P
GO:0030334	87	0.535	1	0.174	1	0.803	1	0.306	1	0.714	1	0.314	1	0.212	1	0.0907	1	regulation of cell migration	P
GO:0030335	37	0.82	1	0.388	1	0.932	1	0.629	1	0.97	1	0.633	1	0.304	1	0.162	1	positive regulation of cell migration	P
GO:0030336	24	0.329	1	0.14	1	0.61	1	0.0743	1	0.263	1	0.178	1	0.545	1	0.514	1	negative regulation of cell migration	P
GO:0030374	21	0.398	1	0.0819	1	0.0811	1	0.0351	1	0.163	1	0.179	1	0.935	1	0.654	1	ligand-dependent nuclear receptor transcription coactivator activity	F
GO:0030375	12	0.537	1	0.329	1	0.195	1	0.161	1	0.333	1	0.274	1	0.848	1	0.853	1	thyroid hormone receptor coactivator activity	F
GO:0030384	61	0.000206	0.0172	0.00012	0.015	0.00215	0.095	0.000452	0.042	0.00129	0.12	0.000639	0.032	0.0184	0.636	0.00797	0.428	phosphoinositide metabolism	P
GO:0030414	224	1	1	1	1	1	1	1	1	1	1	1	1	0.907	1	0.998	1	protease inhibitor activity	F
GO:0030424	84	0.533	1	0.783	1	0.714	1	0.985	1	0.558	1	0.686	1	0.352	1	0.266	1	axon	C
GO:0030425	78	0.759	1	0.112	1	0.978	1	0.19	1	0.833	1	0.0489	1	0.263	1	0.281	1	dendrite	C
GO:0030426	34	0.0744	1	0.0181	1	0.153	1	0.129	1	0.496	1	0.0317	1	0.0519	1	0.15	1	growth cone	C
GO:0030427	34	0.0744	1	0.0181	1	0.153	1	0.129	1	0.496	1	0.0317	1	0.0519	1	0.15	1	site of polarized growth	C
GO:0030433	11	0.0743	1	7.27e-06	0.00451	0.0923	1	0.00159	0.096	0.166	1	0.023	1	0.301	1	0.15	1	ER-associated protein catabolism	P
GO:0030496	10	0.029	1	0.183	1	0.0472	1	0.192	1	0.382	1	0.149	1	0.0522	1	0.315	1	midbody	C
GO:0030500	25	0.568	1	0.679	1	0.817	1	0.903	1	0.291	1	0.461	1	0.518	1	0.535	1	regulation of bone mineralization	P
GO:0030501	13	0.814	1	0.348	1	0.565	1	0.892	1	0.936	1	0.207	1	0.388	1	0.159	1	positive regulation of bone mineralization	P
GO:0030509	42	0.346	1	0.286	1	0.42	1	0.898	1	0.666	1	0.223	1	0.14	1	0.0697	1	BMP signaling pathway	P
GO:0030510	21	0.292	1	0.492	1	0.406	1	0.998	1	0.39	1	0.753	1	0.264	1	0.0419	1	regulation of BMP signaling pathway	P
GO:0030512	11	0.0181	1	0.136	1	0.0646	1	0.155	1	0.0299	1	0.18	1	0.0605	1	0.111	1	negative regulation of transforming growth factor beta receptor signaling pathway	P
GO:0030514	14	0.254	1	0.292	1	0.388	1	0.985	1	0.372	1	0.464	1	0.159	1	0.0335	1	negative regulation of BMP signaling pathway	P
GO:0030516	15	0.126	1	0.273	1	0.374	1	0.41	1	0.238	1	0.592	1	0.22	1	0.0905	1	regulation of axon extension	P
GO:0030518	24	0.018	1	0.00697	0.312	0.0194	1	0.0131	0.647	0.117	1	0.109	1	0.0851	1	0.0346	1	steroid hormone receptor signaling pathway	P
GO:0030521	13	0.0424	1	0.00728	0.312	0.00369	0.22	0.0145	0.647	0.207	1	0.122	1	0.353	1	0.0339	1	androgen receptor signaling pathway	P
GO:0030522	34	0.0182	1	0.0143	0.607	0.0537	1	0.0304	1	0.0383	1	0.0984	1	0.0576	1	0.0778	1	intracellular receptor-mediated signaling pathway	P
GO:0030528	1412	3.59e-11	0.00257	1.36e-11	0	4.74e-10	0.000795	2.2e-10	0	7.34e-07	0.00169	2.7e-07	0.00165	3.28e-05	0.004	3.85e-05	0.007	transcription regulator activity	F
GO:0030529	743	1.01e-24	0	1.13e-12	0	9.42e-24	0	6.9e-14	0	5.95e-19	0	1.46e-09	0.000878	5.02e-06	0.001	0.00483	0.201	ribonucleoprotein complex	C
GO:0030532	15	8.57e-05	0.0143	0.0286	1	0.0119	0.653	0.00477	0.288	6.12e-06	0.00169	0.0564	1	0.00668	0.275	0.964	1	small nuclear ribonucleoprotein complex	C
GO:0030534	82	0.646	1	0.393	1	0.965	1	0.81	1	0.836	1	0.256	1	0.113	1	0.102	1	adult behavior	P
GO:0030539	11	0.89	1	0.995	1	0.942	1	0.929	1	0.611	1	1	1	0.909	1	0.947	1	male genitalia development	P
GO:0030545	10	1	1	1	1	1	1	1	1	1	1	1	1	0.865	1	1	1	receptor regulator activity	F
GO:0030551	26	0.675	1	0.822	1	0.785	1	0.847	1	0.664	1	0.653	1	0.446	1	0.75	1	cyclic nucleotide binding	F
GO:0030552	18	0.479	1	0.469	1	0.613	1	0.519	1	0.569	1	0.396	1	0.278	1	0.503	1	cAMP binding	F
GO:0030554	1661	9.56e-27	0	3.66e-40	0	5.04e-25	0	1.7e-28	0	1.46e-14	0	1.97e-26	0	5.36e-09	0	1.16e-18	0	adenyl nucleotide binding	F
GO:0030574	17	0.277	1	0.857	1	0.387	1	0.918	1	0.6	1	0.889	1	0.127	1	0.56	1	collagen catabolism	P
GO:0030593	16	0.519	1	0.19	1	0.872	1	0.444	1	0.221	1	0.281	1	0.461	1	0.0887	1	neutrophil chemotaxis	P
GO:0030594	239	0.788	1	0.823	1	0.984	1	0.927	1	0.728	1	0.88	1	0.173	1	0.241	1	neurotransmitter receptor activity	F
GO:0030595	30	0.203	1	0.315	1	0.384	1	0.418	1	0.257	1	0.373	1	0.0963	1	0.173	1	leukocyte chemotaxis	P
GO:0030641	13	0.0203	1	0.0248	1	0.16	1	0.0097	0.572	0.0076	0.692	0.155	1	0.115	1	0.139	1	hydrogen ion homeostasis	P
GO:0030658	17	0.0821	1	0.034	1	0.103	1	0.101	1	0.313	1	0.0314	1	0.132	1	0.15	1	transport vesicle membrane	C
GO:0030659	94	0.000421	0.031	2.21e-05	0.007	0.00244	0.107	0.000146	0.013	0.016	0.692	0.000335	0.0233	0.00847	0.275	0.00568	0.428	cytoplasmic vesicle membrane	C
GO:0030660	19	0.0268	1	0.0174	0.763	0.0469	1	0.0845	1	0.194	1	0.00903	0.503	0.0748	1	0.13	1	Golgi-associated vesicle membrane	C
GO:0030662	33	0.00149	0.129	4.17e-05	0.007	0.0145	0.653	0.000703	0.042	0.0574	1	5.04e-05	0.00966	0.0144	0.478	0.00877	0.428	coated vesicle membrane	C
GO:0030665	19	0.0213	1	0.00192	0.13	0.0276	1	0.072	1	0.229	1	0.000843	0.0448	0.036	0.838	0.0236	0.999	clathrin coated vesicle membrane	C
GO:0030667	11	0.298	1	0.051	1	0.218	1	0.0973	1	0.374	1	0.0364	1	0.539	1	0.189	1	secretory granule membrane	C
GO:0030672	16	0.614	1	0.478	1	0.608	1	0.522	1	0.501	1	0.347	1	0.502	1	0.511	1	synaptic vesicle membrane	C
GO:0030674	35	0.0258	1	0.0119	0.607	0.113	1	0.00264	0.161	0.042	1	0.0962	1	0.0918	1	0.0436	1	protein binding, bridging	F
GO:0030693	16	0.493	1	0.833	1	0.723	1	0.931	1	0.388	1	0.626	1	0.46	1	0.734	1	caspase activity	F
GO:0030695	368	0.0438	1	3.64e-07	0.00392	0.162	1	8.57e-05	0.013	0.422	1	2.8e-06	0.0029	0.022	0.636	0.000747	0.06	GTPase regulator activity	F
GO:0030705	135	2.76e-05	0.007	8.57e-06	0.00451	4.75e-06	0.00291	0.000647	0.042	0.00178	0.12	0.000206	0.0233	0.00385	0.223	0.000451	0.03	cytoskeleton-dependent intracellular transport	P
GO:0030728	11	0.871	1	0.991	1	0.817	1	0.932	1	0.793	1	1	1	0.799	1	0.989	1	ovulation	P
GO:0030799	16	0.158	1	0.144	1	0.52	1	0.339	1	0.148	1	0.201	1	0.0896	1	0.0703	1	regulation of cyclic nucleotide metabolism	P
GO:0030801	10	0.0964	1	0.0974	1	0.357	1	0.214	1	0.0914	1	0.125	1	0.115	1	0.0711	1	positive regulation of cyclic nucleotide metabolism	P
GO:0030802	12	0.0836	1	0.229	1	0.348	1	0.267	1	0.096	1	0.48	1	0.0447	1	0.105	1	regulation of cyclic nucleotide biosynthesis	P
GO:0030808	12	0.0836	1	0.229	1	0.348	1	0.267	1	0.096	1	0.48	1	0.0447	1	0.105	1	regulation of nucleotide biosynthesis	P
GO:0030814	11	0.22	1	0.0814	1	0.5	1	0.368	1	0.329	1	0.144	1	0.0497	1	0.0192	0.736	regulation of cAMP metabolism	P
GO:0030832	54	0.00849	0.608	0.000799	0.081	0.0885	1	0.014	0.647	0.131	1	0.026	1	0.00947	0.275	0.000333	0.03	regulation of actin filament length	P
GO:0030833	28	0.0181	1	0.0364	1	0.0496	1	0.124	1	0.208	1	0.171	1	0.0254	0.838	0.0052	0.201	regulation of actin filament polymerization	P
GO:0030834	23	0.114	1	0.00306	0.188	0.429	1	0.0537	1	0.244	1	0.0376	1	0.0837	1	0.0103	0.476	regulation of actin filament depolymerization	P
GO:0030835	21	0.0657	1	0.00357	0.188	0.355	1	0.0568	1	0.154	1	0.0247	1	0.0747	1	0.0107	0.476	negative regulation of actin filament depolymerization	P
GO:0030855	56	0.616	1	0.204	1	0.51	1	0.676	1	0.909	1	0.306	1	0.285	1	0.0079	0.428	epithelial cell differentiation	P
GO:0030856	10	1	1	1	1	1	1	1	1	1	1	1	1	0.966	1	0.471	1	regulation of epithelial cell differentiation	P
GO:0030863	32	0.039	1	5.74e-07	0.00392	0.0151	0.653	0.000129	0.013	0.225	1	0.00692	0.421	0.241	1	0.000707	0.06	cortical cytoskeleton	C
GO:0030864	22	0.246	1	0.00258	0.18	0.0945	1	0.00431	0.288	0.495	1	0.0696	1	0.639	1	0.0665	1	cortical actin cytoskeleton	C
GO:0030865	14	0.0225	1	0.00169	0.0965	0.0385	1	0.0624	1	0.054	1	0.00543	0.343	0.23	1	0.0182	0.656	cortical cytoskeleton organization and biogenesis	P
GO:0030866	11	0.0376	1	0.00675	0.312	0.0866	1	0.142	1	0.0603	1	0.0123	0.503	0.27	1	0.0219	0.999	cortical actin cytoskeleton organization and biogenesis	P
GO:0030867	10	0.207	1	0.145	1	0.231	1	0.191	1	0.932	1	0.113	1	0.0322	0.838	0.384	1	rough endoplasmic reticulum membrane	C
GO:0030878	12	0.759	1	0.997	1	0.877	1	0.988	1	0.696	1	0.907	1	0.725	1	1	1	thyroid gland development	P
GO:0030879	29	0.652	1	0.817	1	0.745	1	0.958	1	0.794	1	0.572	1	0.427	1	0.708	1	mammary gland development	P
GO:0030880	16	1.44e-05	0.007	0.0126	0.607	1.91e-09	0.00098	0.00241	0.139	0.00237	0.12	0.0446	1	0.128	1	0.365	1	RNA polymerase complex	C
GO:0030888	29	0.948	1	0.346	1	0.999	1	0.446	1	0.837	1	0.913	1	0.495	1	0.0843	1	regulation of B cell proliferation	P
GO:0030890	20	0.885	1	0.349	1	0.998	1	0.513	1	0.766	1	1	1	0.391	1	0.0446	1	positive regulation of B cell proliferation	P
GO:0030894	10	0.00312	0.212	0.00401	0.188	0.00416	0.22	0.00329	0.176	0.00067	0.12	0.118	1	0.0951	1	0.228	1	replisome	C
GO:0030900	142	0.439	1	0.573	1	0.649	1	0.734	1	0.549	1	0.363	1	0.166	1	0.628	1	forebrain development	P
GO:0030901	14	0.339	1	0.929	1	0.739	1	0.97	1	0.355	1	0.874	1	0.106	1	0.699	1	midbrain development	P
GO:0030902	57	0.608	1	0.999	1	0.75	1	0.997	1	0.659	1	0.985	1	0.213	1	0.902	1	hindbrain development	P
GO:0030955	108	0.972	1	0.837	1	0.987	1	0.919	1	0.995	1	0.564	1	0.396	1	0.491	1	potassium ion binding	F
GO:0030968	16	0.0775	1	0.0165	0.763	0.22	1	0.0126	0.647	0.112	1	0.153	1	0.0659	1	0.0747	1	unfolded protein response	P
GO:0030983	12	0.532	1	0.151	1	0.59	1	0.348	1	0.699	1	0.089	1	0.539	1	0.145	1	mismatched DNA binding	F
GO:0031012	326	0.798	1	0.628	1	0.983	1	0.967	1	0.694	1	0.485	1	0.211	1	0.0853	1	extracellular matrix	C
GO:0031016	26	0.329	1	0.984	1	0.479	1	0.993	1	0.121	1	0.972	1	0.404	1	0.538	1	pancreas development	P
GO:0031018	16	0.472	1	0.992	1	0.605	1	1	1	0.218	1	0.916	1	0.596	1	0.783	1	endocrine pancreas development	P
GO:0031023	16	0.00424	0.214	9.82e-05	0.015	0.00108	0.079	0.000453	0.042	0.0521	1	0.00223	0.127	0.403	1	0.0648	1	microtubule organizing center organization and biogenesis	P
GO:0031032	12	0.494	1	0.0485	1	0.717	1	0.055	1	0.971	1	0.229	1	0.0748	1	0.0739	1	actomyosin structure organization and biogenesis	P
GO:0031047	12	0.0125	0.608	0.000524	0.0474	0.00709	0.469	0.00101	0.094	0.0204	0.79	0.0619	1	0.395	1	0.0024	0.079	RNA-mediated gene silencing	P
GO:0031069	17	0.591	1	0.672	1	0.94	1	0.81	1	0.612	1	0.634	1	0.124	1	0.124	1	hair follicle morphogenesis	P
GO:0031072	64	0.0102	0.608	0.00181	0.0965	0.0303	1	0.00128	0.094	0.00666	0.692	0.0202	0.756	0.188	1	0.0603	1	heat shock protein binding	F
[truncated: 990 more rows]
