# Supplementary material for: Alu and B1 Repeats Have Been Selectively Retained in the Upstream and Intronic Regions of Genes of Specific Functional Classes
Source: PLoS Comput Biol. 2009 Dec 18;5(12):e1000610. doi: 10.1371/journal.pcbi.1000610 (PMC2784220; doi:10.1371/journal.pcbi.1000610)
Supplement: Table S5 — GO term p-values and q-values for all mouse B families in intronic regions. (1.07 MB XLS) [file pcbi.1000610.s005.xls]

## Sheet: mouse B introns
		B+		B-		B1+		B1-		B2+		B2-		B4+		B4-
GO term id	genes	p-value	q-value	p-value	q-value	p-value	q-value	p-value	q-value	p-value	q-value	p-value	q-value	p-value	q-value	p-value	q-value	GO term description	GO term catecory
GO:0000003	527	1	1	1	1	0.999	1	0.886	1	1	1	1	1	1	1	1	1	reproduction	P
GO:0000030	12	0.00128	0.093	0.00595	0.559	0.0187	0.81	0.0331	1	0.0106	0.414	0.0169	1	0.0595	1	0.173	1	mannosyltransferase activity	F
GO:0000041	64	0.224	1	0.193	1	0.226	1	0.116	1	0.202	1	0.502	1	0.423	1	0.481	1	transition metal ion transport	P
GO:0000045	14	0.166	1	0.0309	1	0.229	1	0.109	1	0.461	1	0.684	1	0.0941	1	0.0343	1	autophagic vacuole formation	P
GO:0000049	18	0.301	1	0.08	1	0.182	1	0.239	1	0.364	1	0.0916	1	0.668	1	0.141	1	tRNA binding	F
GO:0000051	15	0.215	1	0.593	1	0.132	1	0.736	1	0.538	1	0.467	1	0.368	1	0.607	1	urea cycle intermediate metabolism	P
GO:0000059	15	0.0681	1	5.61e-07	0.00266	0.00232	0.118	5.36e-06	0.00177	0.137	1	0.00029	0.0136	0.883	1	0.000295	0.017	protein import into nucleus, docking	P
GO:0000060	22	0.216	1	0.735	1	0.451	1	0.771	1	0.117	1	0.628	1	0.551	1	0.508	1	protein import into nucleus, translocation	P
GO:0000062	12	0.00383	0.186	0.0377	1	0.0139	0.81	0.191	1	0.0617	1	0.061	1	0.0739	1	0.164	1	acyl-CoA binding	F
GO:0000070	21	0.0854	1	0.0194	1	0.124	1	0.0115	0.378	0.0392	1	0.0329	1	0.685	1	0.22	1	mitotic sister chromatid segregation	P
GO:0000074	245	0.000711	0.052	0.00086	0.073	0.00125	0.079	9.52e-05	0.0058	0.00145	0.048	0.0205	1	0.152	1	0.124	1	regulation of progression through cell cycle	P
GO:0000075	44	7.5e-05	0.007	3.69e-05	0.028	0.00121	0.079	6.63e-06	0.00177	0.00264	0.135	0.00959	0.355	0.0172	0.471	0.00161	0.045	cell cycle checkpoint	P
GO:0000077	24	0.00682	0.364	0.0029	0.187	0.0129	0.481	0.00166	0.044	0.0578	1	0.0376	1	0.03	0.753	0.00575	0.258	DNA damage checkpoint	P
GO:0000079	20	0.087	1	0.167	1	0.166	1	0.00965	0.378	0.0883	1	0.657	1	0.215	1	0.661	1	regulation of cyclin-dependent protein kinase activity	P
GO:0000080	10	0.847	1	0.109	1	0.817	1	0.0494	1	0.587	1	0.184	1	0.825	1	0.219	1	G1 phase of mitotic cell cycle	P
GO:0000082	36	0.808	1	0.188	1	0.406	1	0.0685	1	0.836	1	0.192	1	0.847	1	0.896	1	G1/S transition of mitotic cell cycle	P
GO:0000084	14	0.317	1	0.262	1	0.398	1	0.213	1	0.163	1	0.207	1	0.787	1	0.55	1	S phase of mitotic cell cycle	P
GO:0000086	10	0.248	1	0.0176	1	0.477	1	0.00198	0.044	0.0796	1	0.258	1	0.571	1	0.0693	1	G2/M transition of mitotic cell cycle	P
GO:0000087	192	6.08e-11	0.000662	1.73e-20	0	5.21e-11	0	5.75e-15	0	3.46e-08	0	3.9e-13	0	0.0103	0.217	1.16e-08	0	M phase of mitotic cell cycle	P
GO:0000096	20	0.019	0.983	0.0254	1	0.0605	1	0.158	1	0.0742	1	0.0355	1	0.273	1	0.0698	1	sulfur amino acid metabolism	P
GO:0000097	11	0.00352	0.186	0.00755	0.559	0.11	1	0.118	1	0.0752	1	0.123	1	0.232	1	0.0539	1	sulfur amino acid biosynthesis	P
GO:0000118	27	0.193	1	0.0115	0.751	0.5	1	0.0039	0.142	0.0402	1	0.0371	1	0.726	1	0.197	1	histone deacetylase complex	C
GO:0000119	23	0.00119	0.093	0.00278	0.187	0.00343	0.188	0.000193	0.011	0.0191	0.719	0.0701	1	0.746	1	0.39	1	mediator complex	C
GO:0000122	179	0.881	1	0.822	1	0.978	1	0.497	1	0.893	1	0.851	1	0.615	1	0.93	1	negative regulation of transcription from RNA polymerase II promoter	P
GO:0000123	10	0.64	1	0.0437	1	0.342	1	0.0846	1	0.693	1	0.249	1	0.974	1	0.00969	0.472	histone acetyltransferase complex	C
GO:0000139	310	0.000567	0.052	0.000166	0.028	0.0268	1	0.000477	0.0131	0.0221	1	0.0628	1	0.0038	0.0672	0.00143	0.044	Golgi membrane	C
GO:0000149	29	0.313	1	0.711	1	0.311	1	0.646	1	0.453	1	0.871	1	0.378	1	0.438	1	SNARE binding	F
GO:0000151	85	0.000243	0.019	1.4e-05	0.007	0.000528	0.0161	3.56e-05	0.00541	0.000233	0.008	5.23e-05	0.00382	0.0806	1	0.0171	0.94	ubiquitin ligase complex	C
GO:0000152	10	0.253	1	0.0394	1	0.181	1	0.0829	1	0.172	1	0.0336	1	0.618	1	0.0382	1	nuclear ubiquitin ligase complex	C
GO:0000155	30	0.754	1	0.806	1	0.952	1	0.981	1	0.643	1	0.592	1	0.657	1	0.447	1	two-component sensor activity	F
GO:0000159	22	0.0455	1	0.516	1	0.0721	1	0.371	1	0.0717	1	0.638	1	0.585	1	0.676	1	protein phosphatase type 2A complex	C
GO:0000160	32	0.562	1	0.752	1	0.949	1	0.914	1	0.351	1	0.657	1	0.293	1	0.362	1	two-component signal transduction system (phosphorelay)	P
GO:0000165	146	0.912	1	0.907	1	0.995	1	0.907	1	0.915	1	0.691	1	0.647	1	0.656	1	MAPKKK cascade	P
GO:0000166	2206	1.54e-19	0	2.3e-32	0	1.86e-13	0	1.46e-20	0	2.44e-15	0	1.26e-23	0	3.22e-06	0.002	3.32e-10	0	nucleotide binding	F
GO:0000178	11	0.0636	1	0.099	1	0.143	1	0.433	1	0.0727	1	0.0561	1	0.308	1	0.472	1	exosome (RNase complex)	C
GO:0000184	16	0.0135	0.983	0.000728	0.073	0.00341	0.188	0.00711	0.378	0.104	1	0.206	1	0.0797	1	0.0711	1	mRNA catabolism, nonsense-mediated decay	P
GO:0000186	15	0.886	1	0.563	1	0.727	1	0.275	1	0.761	1	0.541	1	0.943	1	0.694	1	activation of MAPKK activity	P
GO:0000187	51	0.679	1	0.679	1	0.948	1	0.984	1	0.369	1	0.371	1	0.429	1	0.173	1	activation of MAPK activity	P
GO:0000209	17	0.0811	1	0.0588	1	0.0576	1	0.0823	1	0.0125	0.481	0.0277	1	0.663	1	0.28	1	protein polyubiquitination	P
GO:0000226	90	0.000423	0.052	0.00961	0.751	0.00394	0.188	0.0117	0.378	0.00986	0.369	0.0956	1	0.00655	0.201	0.163	1	microtubule cytoskeleton organization and biogenesis	P
GO:0000228	105	6.21e-07	0.002	1.3e-08	0.00266	1.1e-06	0.000988	2.82e-07	0.001	1.05e-05	0.00156	7.09e-07	0.002	0.0101	0.217	0.0182	0.94	nuclear chromosome	C
GO:0000245	20	0.0643	1	0.0633	1	0.219	1	0.225	1	0.159	1	0.085	1	0.192	1	0.0645	1	spliceosome assembly	P
GO:0000267	583	0.167	1	0.0995	1	0.804	1	0.334	1	0.222	1	0.0864	1	0.0426	0.834	0.183	1	cell fraction	C
GO:0000271	42	0.0985	1	0.756	1	0.285	1	0.989	1	0.0569	1	0.391	1	0.166	1	0.472	1	polysaccharide biosynthesis	P
GO:0000272	15	0.72	1	0.652	1	0.831	1	0.788	1	0.889	1	0.672	1	0.43	1	0.401	1	polysaccharide catabolism	P
GO:0000278	273	3.45e-08	0.000973	5.06e-17	0	3.58e-08	0	4.33e-13	0	1.24e-06	0.000765	5.93e-11	0	0.0365	0.783	3.78e-06	0.00391	mitotic cell cycle	P
GO:0000279	261	2.38e-13	0.000662	2.91e-23	0	1.34e-13	0	6.65e-17	0	8.03e-09	0	1.22e-14	0	0.00227	0.0554	2.92e-09	0	M phase	P
GO:0000287	384	0.00228	0.102	0.000738	0.073	0.0145	0.81	0.0127	0.378	0.0229	1	0.0081	0.355	0.0374	0.783	0.00599	0.258	magnesium ion binding	F
GO:0000299	15	0.0754	1	0.378	1	0.522	1	0.54	1	0.502	1	0.466	1	0.073	1	0.319	1	integral to membrane of membrane fraction	C
GO:0000302	31	0.0504	1	0.0783	1	0.104	1	0.082	1	0.0669	1	0.0827	1	0.202	1	0.279	1	response to reactive oxygen species	P
GO:0000313	44	0.00804	0.618	0.00219	0.162	0.00581	0.188	0.112	1	0.293	1	0.00335	0.143	0.255	1	0.0808	1	organellar ribosome	C
GO:0000314	14	0.038	1	0.00136	0.075	0.079	1	0.0427	1	0.388	1	0.0166	1	0.238	1	0.0462	1	organellar small ribosomal subunit	C
GO:0000315	22	0.311	1	0.0673	1	0.311	1	0.401	1	0.293	1	0.0575	1	0.78	1	0.213	1	organellar large ribosomal subunit	C
GO:0000323	198	0.0029	0.139	0.000233	0.028	0.0908	1	0.0579	1	0.114	1	0.0841	1	0.0138	0.439	8.06e-05	0.00391	lytic vacuole	C
GO:0000375	50	0.000555	0.052	4.52e-05	0.028	0.00352	0.188	0.00361	0.142	0.0138	0.481	6.25e-05	0.00536	0.204	1	0.252	1	RNA splicing, via transesterification reactions	P
GO:0000377	50	0.000555	0.052	4.52e-05	0.028	0.00352	0.188	0.00361	0.142	0.0138	0.481	6.25e-05	0.00536	0.204	1	0.252	1	RNA splicing, via transesterification reactions with bulged adenosine as nucleophile	P
GO:0000398	50	0.000555	0.052	4.52e-05	0.028	0.00352	0.188	0.00361	0.142	0.0138	0.481	6.25e-05	0.00536	0.204	1	0.252	1	nuclear mRNA splicing, via spliceosome	P
GO:0000502	36	0.00156	0.093	0.000132	0.028	0.0136	0.81	0.0123	0.378	0.0282	1	0.000128	0.0136	0.162	1	0.0627	1	proteasome complex (sensu Eukaryota)	C
GO:0000723	24	0.0157	0.983	0.00255	0.187	0.0415	1	0.00142	0.044	0.00739	0.318	0.0846	1	0.0614	1	0.0403	1	telomere maintenance	P
GO:0000724	12	0.0217	1	0.0075	0.559	0.29	1	0.0153	0.769	0.0252	1	0.00909	0.355	0.0233	0.56	0.0455	1	double-strand break repair via homologous recombination	P
GO:0000725	12	0.0217	1	0.0075	0.559	0.29	1	0.0153	0.769	0.0252	1	0.00909	0.355	0.0233	0.56	0.0455	1	recombinational repair	P
GO:0000775	77	1.13e-06	0.002	7.75e-13	0	9.65e-06	0.00169	8.71e-10	0	1.52e-06	0.000765	3.28e-08	0.000771	0.102	1	2.62e-05	0.00391	chromosome, pericentric region	C
GO:0000776	39	1.38e-07	0.000973	6.36e-15	0	4.13e-06	0.00169	1.61e-10	0	1.72e-07	0	2.81e-08	0.000771	0.0248	0.56	0.00012	0.004	kinetochore	C
GO:0000777	25	0.000269	0.019	1.16e-10	0.00266	0.000707	0.03	1.15e-06	0.001	0.000637	0.044	5.8e-05	0.00536	0.209	1	0.00493	0.258	condensed chromosome kinetochore	C
GO:0000779	33	2.67e-05	0.006	2.72e-08	0.00266	0.000167	0.0161	3.58e-05	0.00541	0.00014	0.008	9.99e-05	0.00536	0.198	1	0.0132	0.94	condensed chromosome, pericentric region	C
GO:0000781	22	0.0104	0.983	0.000926	0.073	0.0367	1	0.000146	0.0058	0.00375	0.135	0.0636	1	0.0655	1	0.0432	1	chromosome, telomeric region	C
GO:0000784	10	0.0693	1	0.104	1	0.239	1	0.0312	1	0.0326	1	0.657	1	0.0973	1	0.404	1	nuclear chromosome, telomeric region	C
GO:0000785	210	0.00897	0.983	7.97e-05	0.028	0.000439	0.0161	3.15e-05	0.00541	0.028	1	0.00941	0.355	0.791	1	0.469	1	chromatin	C
GO:0000786	80	0.0986	1	0.101	1	0.0674	1	0.0202	0.769	0.171	1	0.278	1	0.81	1	0.946	1	nucleosome	C
GO:0000790	37	0.000474	0.052	4.97e-06	0.00286	0.000249	0.0161	3.26e-05	0.00541	0.00161	0.048	0.000313	0.0136	0.0817	1	0.0233	1	nuclear chromatin	C
GO:0000792	41	0.000268	0.019	6.8e-06	0.003	0.00112	0.079	5.39e-05	0.00541	0.000191	0.008	0.000206	0.0136	0.106	1	0.016	0.94	heterochromatin	C
GO:0000793	81	2.97e-08	0.000973	7.5e-11	0.00266	2.24e-07	0.000988	1.31e-08	0	1.76e-07	0	1.45e-08	0.000771	0.0339	0.753	0.00313	0.216	condensed chromosome	C
GO:0000794	39	0.000251	0.019	0.000629	0.073	0.00047	0.0161	0.00174	0.044	0.000823	0.044	0.000634	0.02	0.111	1	0.0847	1	condensed nuclear chromosome	C
GO:0000795	19	0.00415	0.186	0.000291	0.042	0.00484	0.188	0.00142	0.044	0.00557	0.165	0.00198	0.143	0.217	1	0.00105	0.044	synaptonemal complex	C
GO:0000803	15	0.000892	0.093	0.00727	0.559	0.00402	0.188	0.00508	0.142	0.0012	0.044	0.0646	1	0.0603	1	0.167	1	sex chromosome	C
GO:0000819	22	0.0447	1	0.00878	0.559	0.0915	1	0.00532	0.178	0.0191	0.719	0.0161	1	0.614	1	0.148	1	sister chromatid segregation	P
GO:0000902	569	0.862	1	0.993	1	0.961	1	0.973	1	1	1	0.999	1	0.0475	1	0.779	1	cell morphogenesis	P
GO:0000904	212	1	1	1	1	1	1	1	1	1	1	1	1	0.835	1	0.995	1	cellular morphogenesis during differentiation	P
GO:0000910	29	0.000235	0.019	0.000459	0.043	0.00117	0.079	0.00512	0.142	0.00857	0.369	0.00382	0.143	0.579	1	0.0461	1	cytokinesis	P
GO:0000922	22	0.00182	0.102	6.24e-05	0.028	0.0211	1	0.000374	0.013	0.00154	0.048	0.000485	0.02	0.0623	1	0.0614	1	spindle pole	C
GO:0001501	279	1	1	1	1	1	1	1	1	1	1	1	1	1	1	1	1	skeletal development	P
GO:0001502	16	1	1	1	1	0.999	1	1	1	1	1	1	1	0.999	1	1	1	cartilage condensation	P
GO:0001503	143	1	1	0.963	1	0.995	1	0.933	1	0.994	1	0.937	1	0.996	1	0.733	1	ossification	P
GO:0001504	12	1	1	0.998	1	1	1	1	1	1	1	0.911	1	1	1	1	1	neurotransmitter uptake	P
GO:0001505	115	0.986	1	1	1	0.956	1	1	1	0.999	1	1	1	0.766	1	0.778	1	regulation of neurotransmitter levels	P
GO:0001508	47	0.476	1	0.608	1	0.58	1	0.727	1	0.671	1	0.784	1	0.317	1	0.115	1	regulation of action potential	P
GO:0001518	11	0.821	1	0.998	1	1	1	1	1	0.932	1	1	1	0.0873	1	0.332	1	voltage-gated sodium channel complex	C
GO:0001522	13	0.285	1	0.00991	0.751	0.246	1	0.154	1	0.371	1	0.0488	1	0.725	1	0.0873	1	pseudouridine synthesis	P
GO:0001523	16	0.623	1	0.441	1	1	1	0.582	1	0.45	1	0.433	1	0.216	1	0.436	1	retinoid metabolism	P
GO:0001525	157	0.995	1	0.973	1	0.984	1	0.536	1	1	1	1	1	0.776	1	0.995	1	angiogenesis	P
GO:0001533	20	0.863	1	1	1	0.417	1	1	1	0.545	1	1	1	1	1	1	1	cornified envelope	C
GO:0001539	37	0.126	1	0.96	1	0.726	1	0.855	1	0.103	1	1	1	0.12	1	0.523	1	ciliary or flagellar motility	P
GO:0001541	25	0.493	1	0.112	1	0.0775	1	0.337	1	0.879	1	0.13	1	0.964	1	0.0787	1	ovarian follicle development	P
GO:0001542	10	0.438	1	0.786	1	0.775	1	0.993	1	0.652	1	1	1	0.0804	1	0.142	1	ovulation (sensu Mammalia)	P
GO:0001558	123	0.335	1	0.725	1	0.521	1	0.355	1	0.906	1	0.958	1	0.0456	0.834	0.671	1	regulation of cell growth	P
GO:0001565	17	0.124	1	0.227	1	0.296	1	0.814	1	0.197	1	0.343	1	0.0313	0.753	0.0414	1	phorbol ester receptor activity	F
GO:0001568	237	1	1	0.994	1	1	1	0.732	1	1	1	1	1	0.947	1	0.989	1	blood vessel development	P
GO:0001569	21	0.996	1	1	1	1	1	1	1	1	1	0.99	1	0.561	1	0.878	1	patterning of blood vessels	P
GO:0001570	33	0.996	1	0.921	1	1	1	0.999	1	0.647	1	0.942	1	1	1	0.416	1	vasculogenesis	P
GO:0001584	695	1	1	1	1	1	1	1	1	0.99	1	1	1	0.971	1	0.879	1	rhodopsin-like receptor activity	F
GO:0001595	53	0.261	1	0.453	1	0.304	1	0.626	1	0.385	1	0.884	1	0.401	1	0.0577	1	angiotensin receptor activity	F
GO:0001603	16	0.962	1	0.894	1	0.95	1	0.897	1	0.976	1	0.855	1	0.875	1	0.735	1	vasopressin-like receptor activity	F
GO:0001608	108	0.993	1	0.999	1	0.998	1	1	1	0.803	1	1	1	0.875	1	0.248	1	nucleotide receptor activity, G-protein coupled	F
GO:0001614	109	0.991	1	0.999	1	0.998	1	1	1	0.794	1	1	1	0.866	1	0.267	1	purinergic nucleotide receptor activity	F
GO:0001619	20	0.145	1	0.217	1	0.692	1	0.205	1	0.116	1	0.59	1	0.198	1	0.0661	1	lysosphingolipid and lysophosphatidic acid receptor activity	F
GO:0001633	28	0.997	1	0.998	1	0.999	1	1	1	0.985	1	0.931	1	0.811	1	0.902	1	secretin-like receptor activity	F
GO:0001637	42	0.263	1	0.399	1	0.751	1	0.771	1	0.233	1	0.91	1	0.143	1	0.019	0.94	G-protein chemoattractant receptor activity	F
GO:0001649	51	0.995	1	0.522	1	0.869	1	0.605	1	0.982	1	0.602	1	0.997	1	0.163	1	osteoblast differentiation	P
GO:0001653	301	1	1	1	1	1	1	0.99	1	0.99	1	1	1	0.679	1	0.712	1	peptide receptor activity	F
GO:0001654	94	0.794	1	0.917	1	0.656	1	0.784	1	0.828	1	0.889	1	0.715	1	0.756	1	eye development	P
GO:0001655	92	1	1	1	1	1	1	1	1	1	1	0.998	1	0.991	1	0.903	1	urogenital system development	P
GO:0001656	49	1	1	1	1	1	1	1	1	1	1	1	1	1	1	1	1	metanephros development	P
GO:0001657	38	1	1	1	1	1	1	1	1	1	1	1	1	1	1	1	1	ureteric bud development	P
GO:0001658	25	1	1	1	1	1	1	1	1	1	1	1	1	1	1	0.972	1	ureteric bud branching	P
GO:0001659	183	1	1	0.961	1	0.999	1	0.378	1	0.999	1	0.996	1	0.999	1	1	1	thermoregulation	P
GO:0001662	12	0.961	1	0.492	1	0.987	1	0.753	1	0.944	1	0.511	1	0.82	1	0.321	1	behavioral fear response	P
GO:0001664	85	1	1	0.999	1	1	1	1	1	0.998	1	1	1	0.998	1	0.644	1	G-protein-coupled receptor binding	F
GO:0001666	73	0.448	1	0.533	1	0.782	1	0.705	1	0.602	1	0.527	1	0.0841	1	0.256	1	response to hypoxia	P
GO:0001669	35	0.377	1	0.469	1	0.704	1	0.77	1	0.408	1	0.387	1	0.384	1	0.311	1	acrosome	C
GO:0001676	15	0.225	1	0.123	1	0.203	1	0.218	1	0.283	1	0.0503	1	0.693	1	0.263	1	long-chain fatty acid metabolism	P
GO:0001701	144	0.663	1	0.0118	0.751	0.344	1	0.00472	0.142	0.863	1	0.142	1	0.918	1	0.118	1	embryonic development (sensu Mammalia)	P
GO:0001702	26	0.922	1	0.404	1	0.958	1	0.28	1	0.475	1	0.599	1	0.94	1	0.335	1	gastrulation (sensu Deuterostomia)	P
GO:0001704	37	0.8	1	0.118	1	0.91	1	0.211	1	0.839	1	0.325	1	0.41	1	0.118	1	formation of primary germ layer	P
GO:0001707	33	0.738	1	0.0915	1	0.779	1	0.297	1	0.633	1	0.193	1	0.704	1	0.0349	1	mesoderm formation	P
GO:0001708	33	1	1	0.586	1	1	1	0.289	1	1	1	0.955	1	1	1	0.873	1	cell fate specification	P
GO:0001709	25	1	1	0.998	1	1	1	0.942	1	1	1	1	1	1	1	0.988	1	cell fate determination	P
GO:0001725	24	0.498	1	0.1	1	0.8	1	0.253	1	0.413	1	0.186	1	0.346	1	0.0928	1	stress fiber	C
GO:0001726	46	0.055	1	0.0426	1	0.134	1	0.049	1	0.062	1	0.161	1	0.206	1	0.422	1	ruffle	C
GO:0001727	24	0.0675	1	0.0858	1	0.154	1	0.151	1	0.219	1	0.05	1	0.0865	1	0.156	1	lipid kinase activity	F
GO:0001738	11	0.531	1	0.723	1	0.317	1	0.932	1	0.707	1	0.658	1	0.993	1	0.354	1	morphogenesis of a polarized epithelium	P
GO:0001739	14	0.0018	0.102	0.0169	1	0.00417	0.188	0.0132	0.378	0.0038	0.135	0.101	1	0.0815	1	0.232	1	sex chromatin	C
GO:0001750	17	0.524	1	0.46	1	0.831	1	0.453	1	0.58	1	0.901	1	0.224	1	0.017	0.94	photoreceptor outer segment	C
GO:0001754	15	0.893	1	0.46	1	0.279	1	0.218	1	0.886	1	0.477	1	1	1	0.774	1	eye photoreceptor cell differentiation	P
GO:0001755	23	0.982	1	1	1	0.929	1	0.998	1	0.998	1	1	1	0.979	1	0.992	1	neural crest cell migration	P
GO:0001756	34	0.996	1	0.881	1	0.992	1	0.886	1	0.998	1	0.769	1	0.999	1	0.777	1	somitogenesis	P
GO:0001759	14	0.994	1	0.938	1	1	1	0.876	1	0.884	1	0.802	1	0.926	1	0.978	1	induction of an organ	P
GO:0001763	75	1	1	1	1	1	1	1	1	1	1	1	1	0.962	1	0.963	1	morphogenesis of a branching structure	P
GO:0001764	63	0.989	1	0.955	1	0.974	1	0.992	1	0.974	1	0.834	1	0.943	1	0.898	1	neuron migration	P
GO:0001772	22	0.391	1	0.761	1	0.354	1	0.301	1	0.859	1	1	1	0.116	1	0.515	1	immunological synapse	C
GO:0001775	283	0.155	1	0.226	1	0.615	1	0.0891	1	0.634	1	0.991	1	0.0456	0.834	0.0743	1	cell activation	P
GO:0001776	37	0.32	1	0.53	1	0.237	1	0.566	1	0.724	1	0.458	1	0.388	1	0.692	1	leukocyte homeostasis	P
GO:0001782	13	0.159	1	0.692	1	0.171	1	0.275	1	0.936	1	0.704	1	0.227	1	0.633	1	B cell homeostasis	P
GO:0001816	118	0.524	1	0.994	1	0.595	1	0.998	1	0.674	1	0.933	1	0.313	1	0.838	1	cytokine production	P
GO:0001817	13	0.24	1	0.935	1	0.607	1	0.976	1	0.259	1	0.76	1	0.479	1	0.941	1	regulation of cytokine production	P
GO:0001822	82	1	1	0.999	1	1	1	1	1	1	1	0.997	1	0.962	1	0.825	1	kidney development	P
GO:0001824	38	0.299	1	0.00994	0.751	0.128	1	0.00819	0.378	0.123	1	0.0857	1	0.992	1	0.0504	1	blastocyst development	P
GO:0001825	12	0.321	1	0.223	1	0.246	1	0.135	1	0.175	1	0.623	1	0.78	1	0.225	1	blastocyst formation	P
GO:0001832	14	0.0693	1	0.00309	0.213	0.0318	1	0.0166	0.769	0.115	1	0.00752	0.355	0.698	1	0.0467	1	blastocyst growth	P
GO:0001836	16	0.15	1	0.181	1	0.8	1	0.075	1	0.284	1	0.222	1	0.371	1	0.601	1	release of cytochrome c from mitochondria	P
GO:0001837	11	0.642	1	0.145	1	0.698	1	0.0931	1	0.506	1	0.999	1	0.759	1	0.909	1	epithelial to mesenchymal transition	P
GO:0001838	48	0.8	1	0.225	1	0.74	1	0.166	1	0.687	1	0.353	1	0.966	1	0.45	1	embryonic epithelial tube formation	P
GO:0001839	49	0.801	1	0.174	1	0.782	1	0.174	1	0.692	1	0.302	1	0.919	1	0.274	1	neural plate morphogenesis	P
GO:0001841	45	0.709	1	0.145	1	0.681	1	0.111	1	0.557	1	0.261	1	0.949	1	0.33	1	neural tube formation	P
GO:0001843	33	0.895	1	0.418	1	0.672	1	0.481	1	0.64	1	0.411	1	0.999	1	0.547	1	neural tube closure	P
GO:0001871	103	0.826	1	0.989	1	0.988	1	0.961	1	0.955	1	0.997	1	0.0619	1	0.679	1	pattern binding	F
GO:0001889	32	0.586	1	0.213	1	0.608	1	0.224	1	0.349	1	0.21	1	0.917	1	0.355	1	liver development	P
GO:0001890	37	0.393	1	0.131	1	0.595	1	0.237	1	0.207	1	0.212	1	0.409	1	0.0907	1	placenta development	P
GO:0001892	16	0.322	1	0.0539	1	0.274	1	0.0786	1	0.123	1	0.146	1	0.801	1	0.0658	1	embryonic placenta development	P
GO:0001894	47	0.617	1	0.553	1	0.489	1	0.67	1	0.896	1	0.515	1	0.641	1	0.543	1	tissue homeostasis	P
GO:0001906	33	0.477	1	0.77	1	0.373	1	0.665	1	0.97	1	0.555	1	0.0933	1	0.748	1	cell killing	P
GO:0001909	32	0.398	1	0.717	1	0.317	1	0.613	1	0.958	1	0.501	1	0.073	1	0.702	1	leukocyte mediated cytotoxicity	P
GO:0001910	24	0.732	1	0.972	1	0.916	1	0.934	1	1	1	0.853	1	0.0332	0.753	0.796	1	regulation of leukocyte mediated cytotoxicity	P
GO:0001912	18	0.734	1	0.955	1	0.915	1	0.893	1	1	1	0.766	1	0.0821	1	0.838	1	positive regulation of leukocyte mediated cytotoxicity	P
GO:0001932	96	1	1	0.996	1	1	1	0.994	1	1	1	1	1	0.721	1	0.676	1	regulation of protein amino acid phosphorylation	P
GO:0001933	15	0.956	1	0.97	1	0.994	1	0.679	1	1	1	0.999	1	0.364	1	0.98	1	negative regulation of protein amino acid phosphorylation	P
GO:0001934	46	0.932	1	0.865	1	0.946	1	0.838	1	1	1	0.983	1	0.381	1	0.453	1	positive regulation of protein amino acid phosphorylation	P
GO:0001935	28	0.83	1	0.805	1	0.94	1	1	1	0.555	1	0.487	1	0.682	1	0.868	1	endothelial cell proliferation	P
GO:0001936	22	0.821	1	0.805	1	0.909	1	1	1	0.512	1	0.517	1	0.745	1	0.901	1	regulation of endothelial cell proliferation	P
GO:0001937	14	0.495	1	0.541	1	0.767	1	0.971	1	0.324	1	0.339	1	0.47	1	0.896	1	negative regulation of endothelial cell proliferation	P
GO:0001942	40	0.658	1	0.353	1	0.523	1	0.233	1	0.428	1	0.974	1	0.726	1	0.364	1	hair follicle development	P
GO:0001944	240	1	1	0.994	1	1	1	0.738	1	1	1	1	1	0.932	1	0.988	1	vasculature development	P
GO:0001947	16	0.659	1	0.609	1	0.612	1	0.416	1	0.506	1	0.978	1	0.929	1	0.418	1	heart looping	P
GO:0001948	14	0.934	1	0.158	1	0.981	1	0.428	1	0.865	1	0.505	1	0.419	1	0.011	0.643	glycoprotein binding	F
GO:0001952	18	0.859	1	0.572	1	0.732	1	0.735	1	0.804	1	0.478	1	0.6	1	0.415	1	regulation of cell-matrix adhesion	P
GO:0001963	13	0.835	1	0.999	1	0.846	1	0.999	1	0.729	1	0.979	1	0.787	1	0.998	1	synaptic transmission, dopaminergic	P
GO:0001964	11	0.518	1	1	1	0.96	1	0.998	1	0.412	1	1	1	0.169	1	0.79	1	startle response	P
GO:0001974	16	0.996	1	0.996	1	1	1	1	1	0.998	1	0.997	1	0.897	1	0.791	1	blood vessel remodeling	P
GO:0001975	11	0.427	1	0.904	1	0.418	1	0.955	1	0.561	1	0.893	1	0.249	1	0.58	1	response to amphetamine	P
GO:0001976	19	0.87	1	1	1	0.999	1	1	1	0.704	1	1	1	0.778	1	0.9	1	fast regulation of arterial pressure	P
GO:0001990	15	0.795	1	0.999	1	0.987	1	0.995	1	0.964	1	1	1	0.614	1	0.804	1	regulation of blood pressure by hormones	P
GO:0002009	137	1	1	0.995	1	1	1	0.995	1	0.998	1	0.989	1	1	1	0.988	1	morphogenesis of an epithelium	P
GO:0002026	12	0.424	1	0.9	1	0.475	1	0.679	1	0.603	1	0.968	1	0.102	1	0.575	1	cardiac inotropy	P
GO:0002053	14	0.915	1	0.963	1	0.998	1	0.99	1	0.761	1	0.958	1	0.775	1	0.78	1	positive regulation of mesenchymal cell proliferation	P
GO:0002062	20	0.981	1	1	1	0.988	1	1	1	0.93	1	1	1	0.96	1	0.862	1	chondrocyte differentiation	P
GO:0002064	14	0.865	1	0.691	1	0.931	1	0.893	1	0.897	1	0.477	1	0.443	1	0.537	1	epithelial cell development	P
GO:0002088	12	0.358	1	0.829	1	0.877	1	0.943	1	0.615	1	0.694	1	0.0826	1	0.545	1	lens development (sensu Vertebrata)	P
GO:0002200	30	0.0177	0.983	0.0233	1	0.0396	1	0.0616	1	0.224	1	0.244	1	0.0338	0.753	0.0057	0.258	somatic diversification of immune receptors	P
GO:0002204	25	0.0138	0.983	0.0447	1	0.0795	1	0.0405	1	0.123	1	0.506	1	0.0185	0.471	0.00856	0.448	somatic recombination of immunoglobulin genes during immune response	P
GO:0002208	25	0.0138	0.983	0.0447	1	0.0795	1	0.0405	1	0.123	1	0.506	1	0.0185	0.471	0.00856	0.448	somatic diversification of immunoglobulins during immune response	P
GO:0002209	12	0.961	1	0.492	1	0.987	1	0.753	1	0.944	1	0.511	1	0.82	1	0.321	1	behavioral defense response	P
GO:0002217	425	1	1	1	1	1	1	0.996	1	0.999	1	1	1	0.464	1	0.999	1	physiological defense response	P
GO:0002228	21	0.294	1	0.618	1	0.265	1	0.72	1	0.919	1	0.38	1	0.0701	1	0.521	1	natural killer cell mediated immunity	P
GO:0002245	434	1	1	1	1	1	1	1	1	1	1	1	1	0.923	1	0.922	1	physiological response to wounding	P
GO:0002250	152	0.598	1	0.904	1	0.752	1	0.763	1	0.785	1	0.861	1	0.466	1	0.96	1	adaptive immune response	P
GO:0002252	188	0.563	1	0.862	1	0.529	1	0.834	1	0.999	1	0.773	1	0.0633	1	0.831	1	immune effector process	P
GO:0002253	80	0.604	1	0.805	1	0.406	1	0.572	1	0.959	1	0.944	1	0.182	1	0.558	1	activation of immune response	P
GO:0002260	29	0.0666	1	0.0788	1	0.0504	1	0.0844	1	0.461	1	0.137	1	0.134	1	0.266	1	lymphocyte homeostasis	P
GO:0002263	18	0.0359	1	0.26	1	0.131	1	0.108	1	0.07	1	0.821	1	0.0984	1	0.169	1	cell activation during immune response	P
GO:0002274	35	0.134	1	0.141	1	0.296	1	0.11	1	0.574	1	0.893	1	0.0525	1	0.0355	1	myeloid leukocyte activation	P
GO:0002285	16	0.0523	1	0.456	1	0.147	1	0.315	1	0.108	1	0.88	1	0.134	1	0.253	1	lymphocyte activation during immune response	P
GO:0002286	14	0.0266	1	0.425	1	0.0856	1	0.228	1	0.0722	1	0.873	1	0.0944	1	0.294	1	T cell activation during immune response	P
GO:0002292	12	0.0341	1	0.494	1	0.144	1	0.269	1	0.0767	1	0.922	1	0.105	1	0.338	1	T cell differentiation during immune response	P
GO:0002293	12	0.0341	1	0.494	1	0.144	1	0.269	1	0.0767	1	0.922	1	0.105	1	0.338	1	alpha-beta T cell differentiation during immune response	P
GO:0002294	12	0.0341	1	0.494	1	0.144	1	0.269	1	0.0767	1	0.922	1	0.105	1	0.338	1	CD4-positive, alpha-beta T cell differentiation during immune response	P
GO:0002366	18	0.0359	1	0.26	1	0.131	1	0.108	1	0.07	1	0.821	1	0.0984	1	0.169	1	leukocyte activation during immune response	P
GO:0002367	10	0.78	1	1	1	0.668	1	1	1	0.673	1	0.998	1	1	1	1	1	cytokine production during immune response	P
GO:0002376	839	0.994	1	0.991	1	0.994	1	0.897	1	1	1	0.995	1	0.374	1	0.923	1	immune system process	P
GO:0002377	43	0.0183	0.983	0.122	1	0.0356	1	0.282	1	0.36	1	0.328	1	0.0225	0.56	0.0425	1	immunoglobulin production	P
GO:0002381	27	0.0102	0.983	0.0544	1	0.0556	1	0.0494	1	0.155	1	0.517	1	0.0112	0.439	0.00922	0.448	immunoglobulin production during immune response	P
GO:0002429	39	0.0391	1	0.331	1	0.126	1	0.165	1	0.324	1	0.878	1	0.0578	1	0.197	1	immune response-activating cell surface receptor signaling pathway	P
GO:0002437	59	0.996	1	0.986	1	0.998	1	0.969	1	0.998	1	0.88	1	0.763	1	1	1	inflammatory response to antigenic stimulus	P
GO:0002438	52	0.997	1	0.98	1	0.988	1	0.934	1	0.987	1	0.841	1	0.954	1	1	1	acute inflammatory response to antigenic stimulus	P
GO:0002440	48	0.0323	1	0.249	1	0.0527	1	0.436	1	0.393	1	0.465	1	0.0441	0.834	0.115	1	production of molecular mediator of immune response	P
GO:0002443	166	0.552	1	0.756	1	0.638	1	0.605	1	0.994	1	0.735	1	0.0791	1	0.756	1	leukocyte mediated immunity	P
GO:0002444	17	0.144	1	0.379	1	0.298	1	0.219	1	0.685	1	0.948	1	0.0781	1	0.145	1	myeloid leukocyte mediated immunity	P
GO:0002449	155	0.736	1	0.799	1	0.726	1	0.715	1	0.992	1	0.66	1	0.228	1	0.877	1	lymphocyte mediated immunity	P
GO:0002455	33	0.914	1	0.97	1	0.845	1	0.963	1	0.998	1	0.865	1	0.528	1	0.908	1	humoral immune response mediated by circulating immunoglobulin	P
GO:0002456	18	0.258	1	0.255	1	0.353	1	0.137	1	0.497	1	0.5	1	0.211	1	0.392	1	T cell mediated immunity	P
GO:0002460	152	0.598	1	0.904	1	0.752	1	0.763	1	0.785	1	0.861	1	0.466	1	0.96	1	adaptive immune response (sensu Gnathostomata)	P
GO:0002474	18	0.969	1	0.119	1	0.816	1	0.0561	1	0.828	1	0.106	1	0.999	1	0.875	1	antigen processing and presentation of peptide antigen via MHC class I	P
GO:0002478	18	0.769	1	0.176	1	0.708	1	0.184	1	0.267	1	0.322	1	0.998	1	0.808	1	antigen processing and presentation of exogenous peptide antigen	P
GO:0002495	16	0.941	1	0.276	1	0.966	1	0.242	1	0.333	1	0.468	1	0.999	1	0.842	1	antigen processing and presentation of peptide antigen via MHC class II	P
GO:0002504	18	0.92	1	0.322	1	0.917	1	0.251	1	0.434	1	0.507	1	0.99	1	0.863	1	antigen processing and presentation of peptide or polysaccharide antigen via MHC class II	P
GO:0002520	308	0.802	1	0.534	1	0.871	1	0.224	1	0.746	1	0.96	1	0.902	1	0.829	1	immune system development	P
GO:0002521	154	0.56	1	0.353	1	0.687	1	0.139	1	0.669	1	0.985	1	0.574	1	0.507	1	leukocyte differentiation	P
GO:0002524	52	0.997	1	0.98	1	0.988	1	0.934	1	0.987	1	0.841	1	0.954	1	1	1	hypersensitivity	P
GO:0002526	121	1	1	1	1	0.99	1	1	1	1	1	0.994	1	0.983	1	0.997	1	acute inflammatory response	P
GO:0002541	37	0.988	1	0.998	1	0.833	1	0.999	1	1	1	0.965	1	0.578	1	0.961	1	activation of plasma proteins during acute inflammatory response	P
GO:0002562	28	0.00904	0.983	0.0212	1	0.0445	1	0.0588	1	0.155	1	0.256	1	0.0154	0.439	0.00295	0.216	somatic diversification of immune receptors via germline recombination within a single locus	P
GO:0002573	53	0.66	1	0.771	1	0.756	1	0.626	1	0.377	1	0.857	1	0.893	1	0.594	1	myeloid leukocyte differentiation	P
GO:0002673	10	0.834	1	0.82	1	0.743	1	0.732	1	0.674	1	0.888	1	0.728	1	0.724	1	regulation of acute inflammatory response	P
GO:0002682	127	0.405	1	0.944	1	0.736	1	0.958	1	0.961	1	0.979	1	0.018	0.471	0.32	1	regulation of immune system process	P
GO:0002683	12	0.0514	1	0.766	1	0.655	1	0.666	1	0.0958	1	0.99	1	0.0518	1	0.561	1	negative regulation of immune system process	P
GO:0002684	108	0.768	1	0.937	1	0.755	1	0.871	1	0.995	1	0.976	1	0.124	1	0.589	1	positive regulation of immune system process	P
GO:0002697	25	0.584	1	0.947	1	0.751	1	0.865	1	0.799	1	0.982	1	0.232	1	0.891	1	regulation of immune effector process	P
GO:0002699	21	0.514	1	0.902	1	0.589	1	0.903	1	0.761	1	0.969	1	0.298	1	0.74	1	positive regulation of immune effector process	P
GO:0002703	24	0.541	1	0.938	1	0.71	1	0.836	1	0.769	1	0.978	1	0.221	1	0.901	1	regulation of leukocyte mediated immunity	P
GO:0002705	20	0.466	1	0.887	1	0.537	1	0.875	1	0.725	1	0.963	1	0.285	1	0.756	1	positive regulation of leukocyte mediated immunity	P
GO:0002706	24	0.541	1	0.938	1	0.71	1	0.836	1	0.769	1	0.978	1	0.221	1	0.901	1	regulation of lymphocyte mediated immunity	P
GO:0002708	20	0.466	1	0.887	1	0.537	1	0.875	1	0.725	1	0.963	1	0.285	1	0.756	1	positive regulation of lymphocyte mediated immunity	P
GO:0002712	14	0.732	1	0.877	1	0.837	1	0.687	1	0.841	1	0.973	1	0.25	1	0.658	1	regulation of B cell mediated immunity	P
GO:0002714	11	0.789	1	0.851	1	0.74	1	0.796	1	0.866	1	0.977	1	0.41	1	0.452	1	positive regulation of B cell mediated immunity	P
GO:0002757	43	0.0538	1	0.163	1	0.115	1	0.0744	1	0.291	1	0.662	1	0.0934	1	0.154	1	immune response-activating signal transduction	P
GO:0002761	24	0.94	1	0.851	1	0.773	1	0.814	1	0.908	1	0.742	1	1	1	0.793	1	regulation of myeloid leukocyte differentiation	P
GO:0002762	10	0.805	1	0.202	1	0.281	1	0.394	1	0.948	1	0.212	1	0.982	1	0.344	1	negative regulation of myeloid leukocyte differentiation	P
GO:0002763	11	0.943	1	0.945	1	0.965	1	0.91	1	0.874	1	0.922	1	0.995	1	0.858	1	positive regulation of myeloid leukocyte differentiation	P
GO:0002764	46	0.0288	1	0.177	1	0.164	1	0.0766	1	0.243	1	0.708	1	0.0315	0.753	0.136	1	immune response-regulating signal transduction	P
GO:0002768	42	0.0199	1	0.351	1	0.18	1	0.169	1	0.268	1	0.905	1	0.0175	0.471	0.173	1	immune response-regulating cell surface receptor signaling pathway	P
GO:0002790	45	0.733	1	0.681	1	0.904	1	0.884	1	0.222	1	0.56	1	0.929	1	0.308	1	peptide secretion	P
GO:0002819	26	0.572	1	0.878	1	0.829	1	0.66	1	0.52	1	0.996	1	0.372	1	0.914	1	regulation of adaptive immune response	P
GO:0002821	20	0.515	1	0.753	1	0.601	1	0.619	1	0.608	1	0.99	1	0.45	1	0.743	1	positive regulation of adaptive immune response	P
GO:0002822	26	0.572	1	0.878	1	0.829	1	0.66	1	0.52	1	0.996	1	0.372	1	0.914	1	regulation of adaptive immune response (sensu Gnathostomata)	P
GO:0002824	20	0.515	1	0.753	1	0.601	1	0.619	1	0.608	1	0.99	1	0.45	1	0.743	1	positive regulation of adaptive immune response (sensu Gnathostomata)	P
GO:0002861	14	0.744	1	0.823	1	0.939	1	0.805	1	0.918	1	0.952	1	0.307	1	0.75	1	regulation of inflammatory response to antigenic stimulus	P
GO:0002863	10	0.903	1	0.574	1	0.783	1	0.522	1	0.823	1	0.873	1	0.77	1	0.651	1	positive regulation of inflammatory response to antigenic stimulus	P
GO:0002864	10	0.834	1	0.82	1	0.743	1	0.732	1	0.674	1	0.888	1	0.728	1	0.724	1	regulation of acute inflammatory response to antigenic stimulus	P
GO:0002883	10	0.834	1	0.82	1	0.743	1	0.732	1	0.674	1	0.888	1	0.728	1	0.724	1	regulation of hypersensitivity	P
GO:0002889	14	0.732	1	0.877	1	0.837	1	0.687	1	0.841	1	0.973	1	0.25	1	0.658	1	regulation of immunoglobulin mediated immune response	P
GO:0002891	11	0.789	1	0.851	1	0.74	1	0.796	1	0.866	1	0.977	1	0.41	1	0.452	1	positive regulation of immunoglobulin mediated immune response	P
GO:0003674	15302	1.21e-29	0	1.4e-45	0	4.91e-14	0	6.21e-26	0	6.05e-17	0	3.39e-16	0	2.81e-09	0	4.5e-20	0	molecular_function	F
GO:0003676	3286	0.00012	0.019	1.41e-22	0	1.01e-07	0.000988	1.08e-23	0	2.31e-05	0.00156	1.11e-15	0	0.987	1	0.149	1	nucleic acid binding	F
GO:0003677	2156	0.0278	1	1.58e-07	0.00266	0.00286	0.127	1.36e-09	0	0.0138	0.481	0.00073	0.0206	0.919	1	0.125	1	DNA binding	F
GO:0003678	25	0.00786	0.618	8.89e-05	0.028	0.137	1	0.00181	0.044	0.00503	0.135	0.0148	1	0.0679	1	4.15e-05	0.00391	DNA helicase activity	F
GO:0003682	129	0.136	1	0.00145	0.075	0.114	1	0.035	1	0.223	1	0.0205	1	0.311	1	0.0208	1	chromatin binding	F
GO:0003684	33	0.0472	1	0.000673	0.073	0.114	1	0.00185	0.044	0.0266	1	0.0145	1	0.342	1	0.0133	0.94	damaged DNA binding	F
GO:0003690	41	0.327	1	0.0783	1	0.358	1	0.0446	1	0.375	1	0.098	1	0.477	1	0.566	1	double-stranded DNA binding	F
GO:0003697	37	0.0491	1	0.0632	1	0.062	1	0.141	1	0.136	1	0.0436	1	0.206	1	0.312	1	single-stranded DNA binding	F
GO:0003700	883	0.999	1	1	1	0.999	1	0.788	1	1	1	1	1	0.884	1	0.951	1	transcription factor activity	F
GO:0003702	91	0.133	1	0.043	1	0.0229	1	0.00987	0.378	0.617	1	0.203	1	0.415	1	0.416	1	RNA polymerase II transcription factor activity	F
GO:0003705	21	0.927	1	1	1	0.82	1	0.998	1	0.899	1	0.989	1	0.975	1	1	1	RNA polymerase II transcription factor activity, enhancer binding	F
GO:0003707	53	0.825	1	0.976	1	0.871	1	0.957	1	0.953	1	0.864	1	0.165	1	0.889	1	steroid hormone receptor activity	F
GO:0003708	24	0.734	1	0.867	1	0.575	1	0.339	1	0.863	1	0.895	1	0.459	1	0.998	1	retinoic acid receptor activity	F
GO:0003711	13	0.0328	1	0.0129	0.751	0.0223	1	0.00219	0.045	0.283	1	0.0583	1	0.0553	1	0.152	1	transcriptional elongation regulator activity	F
GO:0003712	163	0.0099	0.983	0.000664	0.073	0.00266	0.118	0.000972	0.036	0.0739	1	0.0395	1	0.404	1	0.0513	1	transcription cofactor activity	F
GO:0003713	92	0.00304	0.139	0.000704	0.073	0.00147	0.079	0.00146	0.044	0.0397	1	0.0686	1	0.181	1	0.0551	1	transcription coactivator activity	F
GO:0003714	59	0.166	1	0.115	1	0.205	1	0.233	1	0.201	1	0.129	1	0.534	1	0.208	1	transcription corepressor activity	F
GO:0003723	608	8.25e-09	0.000973	1.6e-27	0	1.92e-08	0	3.53e-18	0	5.43e-05	0.00156	7.79e-19	0	0.234	1	0.000825	0.033	RNA binding	F
GO:0003725	37	0.0805	1	0.00157	0.075	0.133	1	0.0187	0.769	0.0771	1	0.00378	0.143	0.115	1	0.00805	0.448	double-stranded RNA binding	F
GO:0003727	19	0.44	1	0.563	1	0.18	1	0.206	1	0.436	1	0.614	1	0.883	1	0.99	1	single-stranded RNA binding	F
GO:0003729	41	0.849	1	0.0204	1	0.311	1	0.00303	0.142	0.803	1	0.153	1	0.998	1	0.633	1	mRNA binding	F
GO:0003735	221	0.799	1	0.0445	1	0.75	1	0.0104	0.378	0.439	1	0.319	1	1	1	0.659	1	structural constituent of ribosome	F
GO:0003743	83	7.04e-05	0.007	1.21e-09	0.00266	0.000575	0.022	8.74e-05	0.0058	3.84e-05	0.00156	1.08e-08	0.000771	0.317	1	0.039	1	translation initiation factor activity	F
GO:0003746	35	0.457	1	0.51	1	0.185	1	0.33	1	0.638	1	0.546	1	0.642	1	0.483	1	translation elongation factor activity	F
GO:0003755	33	0.000374	0.052	4.31e-05	0.028	0.00133	0.079	0.00466	0.142	0.013	0.481	9.88e-05	0.00536	0.00659	0.201	0.021	1	peptidyl-prolyl cis-trans isomerase activity	F
GO:0003774	161	7.82e-06	0.005	0.0185	1	0.00201	0.118	0.0239	0.769	0.000394	0.019	0.0975	1	0.00141	0.038	0.0701	1	motor activity	F
GO:0003777	78	6.74e-05	0.007	5.46e-05	0.028	0.000198	0.0161	0.000317	0.013	0.00137	0.048	0.00158	0.051	0.0607	1	0.0126	0.94	microtubule motor activity	F
GO:0003779	305	0.0021	0.102	0.104	1	0.0834	1	0.577	1	0.069	1	0.3	1	0.000101	0.003	0.0165	0.94	actin binding	F
GO:0003796	11	0.195	1	0.592	1	0.809	1	0.373	1	0.962	1	0.426	1	0.0584	1	0.437	1	lysozyme activity	F
GO:0003810	11	0.978	1	0.944	1	0.994	1	0.927	1	0.964	1	0.732	1	0.811	1	0.976	1	protein-glutamine gamma-glutamyltransferase activity	F
GO:0003823	49	1	1	1	1	1	1	1	1	1	1	1	1	1	1	1	1	antigen binding	F
GO:0003824	5745	8.01e-35	0	3.84e-42	0	5.33e-20	0	2.41e-20	0	1.74e-20	0	1.85e-28	0	3.37e-15	0	8.55e-24	0	catalytic activity	F
GO:0003854	20	0.918	1	0.764	1	0.683	1	0.96	1	0.609	1	0.486	1	0.993	1	0.578	1	3-beta-hydroxy-delta5-steroid dehydrogenase activity	F
GO:0003887	32	0.398	1	0.182	1	0.156	1	0.148	1	0.282	1	0.153	1	0.977	1	0.586	1	DNA-directed DNA polymerase activity	F
GO:0003899	38	8.52e-05	0.007	3.07e-05	0.028	0.000272	0.0161	2.62e-05	0.00192	0.0037	0.135	0.000577	0.02	0.289	1	0.0379	1	DNA-directed RNA polymerase activity	F
GO:0003916	20	0.106	1	0.132	1	0.0573	1	0.444	1	0.223	1	0.0997	1	0.464	1	0.63	1	DNA topoisomerase activity	F
GO:0003918	17	0.143	1	0.125	1	0.0287	1	0.487	1	0.354	1	0.11	1	0.626	1	0.592	1	DNA topoisomerase (ATP-hydrolyzing) activity	F
GO:0003924	231	0.0391	1	0.0533	1	0.168	1	0.0595	1	0.0416	1	0.0966	1	0.106	1	0.266	1	GTPase activity	F
GO:0003950	19	0.00161	0.093	0.00015	0.028	0.0151	0.81	5.82e-05	0.0058	0.00389	0.135	0.000826	0.048	0.0142	0.439	0.0252	1	NAD+ ADP-ribosyltransferase activity	F
GO:0003954	34	0.0449	1	0.000442	0.043	0.0632	1	0.000151	0.0058	0.579	1	0.0215	1	0.0809	1	0.11	1	NADH dehydrogenase activity	F
GO:0003993	16	0.0319	1	0.136	1	0.309	1	0.374	1	0.118	1	0.124	1	0.0277	0.606	0.172	1	acid phosphatase activity	F
GO:0003995	17	0.00352	0.186	0.025	1	0.00366	0.188	0.0355	1	0.00609	0.165	0.0419	1	0.0973	1	0.643	1	acyl-CoA dehydrogenase activity	F
GO:0004003	14	0.0191	0.983	0.00328	0.213	0.0614	1	0.0351	1	0.0322	1	0.0221	1	0.0383	0.783	0.000366	0.021	ATP-dependent DNA helicase activity	F
GO:0004012	16	0.831	1	0.867	1	0.974	1	0.963	1	0.886	1	0.898	1	0.223	1	0.763	1	phospholipid-translocating ATPase activity	F
GO:0004016	11	0.874	1	0.981	1	0.946	1	0.558	1	0.716	1	1	1	0.607	1	0.658	1	adenylate cyclase activity	F
GO:0004022	35	0.3	1	0.448	1	0.566	1	0.934	1	0.335	1	0.294	1	0.111	1	0.177	1	alcohol dehydrogenase activity	F
GO:0004033	11	0.917	1	0.377	1	0.905	1	0.62	1	0.747	1	0.155	1	0.873	1	0.795	1	aldo-keto reductase activity	F
GO:0004089	19	0.569	1	0.842	1	0.49	1	0.718	1	0.407	1	0.949	1	0.911	1	0.542	1	carbonate dehydratase activity	F
GO:0004091	36	0.369	1	0.914	1	0.75	1	0.936	1	0.485	1	0.735	1	0.176	1	0.634	1	carboxylesterase activity	F
GO:0004104	18	0.868	1	1	1	0.974	1	1	1	0.906	1	0.994	1	0.377	1	1	1	cholinesterase activity	F
GO:0004112	27	0.404	1	0.606	1	0.316	1	0.908	1	0.361	1	0.203	1	0.375	1	0.621	1	cyclic-nucleotide phosphodiesterase activity	F
GO:0004114	25	0.478	1	0.692	1	0.551	1	0.98	1	0.352	1	0.209	1	0.304	1	0.621	1	3',5'-cyclic-nucleotide phosphodiesterase activity	F
GO:0004129	25	0.154	1	0.0774	1	0.0586	1	0.332	1	0.131	1	0.0833	1	0.786	1	0.177	1	cytochrome-c oxidase activity	F
GO:0004143	15	0.785	1	0.667	1	0.599	1	0.57	1	0.674	1	0.599	1	0.986	1	0.87	1	diacylglycerol kinase activity	F
GO:0004175	497	0.44	1	0.606	1	0.717	1	0.991	1	0.958	1	0.728	1	0.0174	0.471	0.00558	0.258	endopeptidase activity	F
GO:0004176	17	0.283	1	0.386	1	0.273	1	0.222	1	0.709	1	0.769	1	0.381	1	0.427	1	ATP-dependent peptidase activity	F
GO:0004177	42	0.567	1	0.394	1	0.334	1	0.278	1	0.761	1	0.463	1	0.802	1	0.551	1	aminopeptidase activity	F
GO:0004179	12	0.582	1	0.55	1	0.365	1	0.412	1	0.68	1	0.443	1	0.766	1	0.934	1	membrane alanyl aminopeptidase activity	F
GO:0004180	46	0.95	1	0.846	1	0.941	1	0.729	1	0.798	1	0.916	1	0.784	1	0.608	1	carboxypeptidase activity	F
GO:0004181	33	0.871	1	0.837	1	0.833	1	0.662	1	0.763	1	0.82	1	0.58	1	0.871	1	metallocarboxypeptidase activity	F
GO:0004182	30	0.832	1	0.853	1	0.812	1	0.711	1	0.67	1	0.872	1	0.605	1	0.738	1	carboxypeptidase A activity	F
GO:0004190	29	0.0787	1	0.117	1	0.298	1	0.269	1	0.0678	1	0.11	1	0.191	1	0.169	1	aspartic-type endopeptidase activity	F
GO:0004197	97	0.138	1	0.331	1	0.395	1	0.252	1	0.455	1	0.593	1	0.0134	0.439	0.15	1	cysteine-type endopeptidase activity	F
GO:0004198	16	0.261	1	0.597	1	0.463	1	0.998	1	0.673	1	0.442	1	0.0341	0.753	0.248	1	calpain activity	F
GO:0004221	65	0.0325	1	0.000406	0.043	0.0815	1	0.000153	0.0058	0.0037	0.135	0.0139	1	0.603	1	0.0102	0.472	ubiquitin thiolesterase activity	F
GO:0004222	112	0.43	1	0.931	1	0.6	1	0.964	1	0.443	1	0.84	1	0.175	1	0.849	1	metalloendopeptidase activity	F
GO:0004252	233	0.936	1	0.79	1	0.883	1	0.999	1	1	1	0.916	1	0.258	1	0.00571	0.258	serine-type endopeptidase activity	F
GO:0004263	15	0.466	1	0.437	1	0.438	1	0.863	1	0.845	1	0.35	1	0.36	1	0.332	1	chymotrypsin activity	F
GO:0004289	21	0.25	1	0.472	1	0.632	1	0.926	1	0.245	1	0.149	1	0.234	1	0.327	1	subtilase activity	F
GO:0004293	13	1	1	6.1e-06	0.003	1	1	0.0206	0.769	1	1	1	1	1	1	8.14e-21	0	tissue kallikrein activity	F
GO:0004295	19	0.998	1	0.819	1	1	1	0.975	1	0.907	1	0.86	1	0.941	1	0.424	1	trypsin activity	F
GO:0004298	19	0.0326	1	0.0106	0.751	0.0788	1	0.22	1	0.234	1	0.00508	0.202	0.232	1	0.114	1	threonine endopeptidase activity	F
GO:0004303	10	0.177	1	0.463	1	0.207	1	0.621	1	0.134	1	0.367	1	0.184	1	0.463	1	estradiol 17-beta-dehydrogenase activity	F
GO:0004364	28	1	1	0.999	1	1	1	1	1	0.892	1	0.923	1	0.973	1	0.979	1	glutathione transferase activity	F
GO:0004365	22	1	1	0.787	1	1	1	1	1	0.763	1	0.293	1	0.937	1	1	1	glyceraldehyde-3-phosphate dehydrogenase (phosphorylating) activity	F
GO:0004383	11	0.433	1	0.996	1	0.688	1	0.834	1	0.648	1	1	1	0.0986	1	0.778	1	guanylate cyclase activity	F
GO:0004386	141	4.14e-08	0.000973	9.8e-15	0	5.45e-08	0.000988	6.07e-12	0	1.84e-07	0	3.49e-08	0.000771	0.0223	0.56	1.16e-07	0	helicase activity	F
GO:0004396	10	0.149	1	0.358	1	0.0993	1	0.166	1	0.374	1	0.533	1	0.295	1	0.443	1	hexokinase activity	F
GO:0004402	20	0.00214	0.102	0.000813	0.073	0.00575	0.188	0.00275	0.142	0.0189	0.719	0.0152	1	0.0863	1	0.0044	0.258	histone acetyltransferase activity	F
GO:0004407	18	0.017	0.983	0.028	1	0.0404	1	0.0432	1	0.0485	1	0.215	1	0.25	1	0.0434	1	histone deacetylase activity	F
GO:0004428	35	0.000449	0.052	0.00306	0.213	0.000685	0.03	0.0178	0.769	0.0113	0.414	0.00481	0.202	0.0343	0.753	0.00492	0.258	inositol or phosphatidylinositol kinase activity	F
GO:0004434	16	0.892	1	0.768	1	0.66	1	0.935	1	0.999	1	0.727	1	0.487	1	0.247	1	inositol or phosphatidylinositol phosphodiesterase activity	F
GO:0004435	16	0.892	1	0.768	1	0.66	1	0.935	1	0.999	1	0.727	1	0.487	1	0.247	1	phosphoinositide phospholipase C activity	F
GO:0004437	34	0.229	1	0.0328	1	0.31	1	0.102	1	0.388	1	0.0894	1	0.352	1	0.0647	1	inositol or phosphatidylinositol phosphatase activity	F
GO:0004467	13	0.299	1	0.0527	1	0.16	1	0.0954	1	0.81	1	0.0936	1	0.435	1	0.15	1	long-chain-fatty-acid-CoA ligase activity	F
GO:0004468	20	0.00214	0.102	0.000813	0.073	0.00575	0.188	0.00275	0.142	0.0189	0.719	0.0152	1	0.0863	1	0.0044	0.258	lysine N-acetyltransferase activity	F
GO:0004497	174	0.999	1	1	1	1	1	0.996	1	0.923	1	1	1	0.263	1	0.812	1	monooxygenase activity	F
GO:0004499	23	0.187	1	0.994	1	0.799	1	0.999	1	0.203	1	1	1	0.02	0.471	0.461	1	dimethylaniline monooxygenase (N-oxide-forming) activity	F
GO:0004518	153	0.00958	0.983	0.0074	0.559	0.0333	1	0.0148	0.769	0.0367	1	0.00548	0.202	0.0438	0.834	0.666	1	nuclease activity	F
GO:0004519	97	0.047	1	0.081	1	0.07	1	0.0465	1	0.185	1	0.11	1	0.0706	1	0.915	1	endonuclease activity	F
GO:0004520	15	0.0781	1	0.0473	1	0.235	1	0.163	1	0.055	1	0.187	1	0.397	1	0.331	1	endodeoxyribonuclease activity	F
GO:0004521	40	0.425	1	0.696	1	0.196	1	0.475	1	0.653	1	0.33	1	0.563	1	0.999	1	endoribonuclease activity	F
GO:0004522	15	1	1	1	1	1	1	1	1	1	1	0.993	1	1	1	0.878	1	pancreatic ribonuclease activity	F
GO:0004526	10	0.102	1	0.96	1	0.251	1	0.25	1	0.37	1	0.995	1	0.0708	1	1	1	ribonuclease P activity	F
GO:0004527	53	0.0245	1	0.0144	1	0.0528	1	0.0432	1	0.0428	1	0.00477	0.202	0.161	1	0.203	1	exonuclease activity	F
GO:0004532	12	0.0913	1	0.0821	1	0.206	1	0.473	1	0.187	1	0.182	1	0.137	1	0.0714	1	exoribonuclease activity	F
GO:0004536	26	0.0748	1	0.212	1	0.105	1	0.36	1	0.117	1	0.378	1	0.168	1	0.61	1	deoxyribonuclease activity	F
GO:0004540	58	0.196	1	0.368	1	0.127	1	0.384	1	0.498	1	0.181	1	0.301	1	0.883	1	ribonuclease activity	F
GO:0004549	13	0.0323	1	0.68	1	0.101	1	0.121	1	0.227	1	0.859	1	0.0911	1	1	1	tRNA-specific ribonuclease activity	F
GO:0004550	11	0.104	1	0.102	1	0.0589	1	0.163	1	0.0518	1	0.0912	1	0.768	1	0.283	1	nucleoside diphosphate kinase activity	F
GO:0004553	113	0.0449	1	0.143	1	0.00874	0.469	0.179	1	0.559	1	0.498	1	0.138	1	0.0119	0.94	hydrolase activity, hydrolyzing O-glycosyl compounds	F
GO:0004568	10	1	1	0.996	1	0.979	1	0.995	1	1	1	0.982	1	1	1	0.853	1	chitinase activity	F
GO:0004601	49	0.132	1	0.15	1	0.861	1	0.239	1	0.215	1	0.227	1	0.0502	1	0.209	1	peroxidase activity	F
GO:0004602	10	0.157	1	0.515	1	0.668	1	0.459	1	0.744	1	0.347	1	0.0836	1	0.998	1	glutathione peroxidase activity	F
GO:0004620	57	0.07	1	0.261	1	0.0424	1	0.396	1	0.857	1	0.347	1	0.0247	0.56	0.104	1	phospholipase activity	F
GO:0004623	27	0.194	1	0.293	1	0.302	1	0.529	1	0.594	1	0.283	1	0.084	1	0.189	1	phospholipase A2 activity	F
GO:0004629	20	0.658	1	0.793	1	0.262	1	0.865	1	1	1	0.778	1	0.374	1	0.443	1	phospholipase C activity	F
GO:0004653	15	0.911	1	0.98	1	1	1	1	1	0.76	1	0.947	1	0.414	1	0.336	1	polypeptide N-acetylgalactosaminyltransferase activity	F
GO:0004659	18	0.0922	1	0.315	1	0.304	1	0.089	1	0.231	1	0.506	1	0.108	1	0.654	1	prenyltransferase activity	F
GO:0004672	669	0.0105	0.983	0.00267	0.187	0.156	1	0.129	1	0.0408	1	0.00342	0.143	0.0213	0.529	0.0175	0.94	protein kinase activity	F
GO:0004673	30	0.754	1	0.806	1	0.952	1	0.981	1	0.643	1	0.592	1	0.657	1	0.447	1	protein histidine kinase activity	F
GO:0004674	546	0.000138	0.019	5.38e-06	0.003	0.008	0.343	0.00347	0.142	0.00316	0.135	0.000173	0.0136	0.0127	0.439	0.00305	0.216	protein serine/threonine kinase activity	F
GO:0004675	13	0.269	1	0.318	1	0.627	1	0.292	1	0.394	1	0.304	1	0.569	1	0.532	1	transmembrane receptor protein serine/threonine kinase activity	F
GO:0004683	22	0.134	1	0.89	1	0.263	1	0.984	1	0.117	1	0.663	1	0.235	1	0.778	1	calmodulin regulated protein kinase activity	F
GO:0004689	15	0.17	1	0.909	1	0.3	1	0.989	1	0.112	1	0.548	1	0.361	1	0.873	1	phosphorylase kinase activity	F
GO:0004693	31	0.0142	0.983	0.0401	1	0.101	1	0.0241	0.769	0.0375	1	0.0595	1	0.0843	1	0.823	1	cyclin-dependent protein kinase activity	F
GO:0004697	15	0.107	1	0.194	1	0.27	1	0.759	1	0.202	1	0.294	1	0.0237	0.56	0.0549	1	protein kinase C activity	F
GO:0004702	55	0.109	1	0.062	1	0.0991	1	0.0707	1	0.39	1	0.115	1	0.229	1	0.25	1	receptor signaling protein serine/threonine kinase activity	F
GO:0004707	18	0.325	1	0.0931	1	0.149	1	0.027	1	0.186	1	0.139	1	0.842	1	0.511	1	MAP kinase activity	F
GO:0004709	17	0.177	1	0.488	1	0.223	1	0.822	1	0.665	1	0.368	1	0.0699	1	0.456	1	MAP kinase kinase kinase activity	F
GO:0004712	10	0.978	1	0.906	1	0.966	1	0.951	1	0.893	1	0.956	1	0.931	1	0.515	1	protein threonine/tyrosine kinase activity	F
GO:0004713	553	0.0364	1	0.00281	0.187	0.223	1	0.113	1	0.0822	1	0.00683	0.355	0.027	0.606	0.0137	0.94	protein-tyrosine kinase activity	F
GO:0004714	111	1	1	1	1	1	1	1	1	1	1	1	1	0.796	1	0.783	1	transmembrane receptor protein tyrosine kinase activity	F
GO:0004715	38	0.212	1	0.0588	1	0.468	1	0.0412	1	0.31	1	0.337	1	0.076	1	0.0275	1	non-membrane spanning protein tyrosine kinase activity	F
GO:0004721	158	0.0243	1	0.00265	0.187	0.0981	1	0.0355	1	0.0417	1	0.0604	1	0.0608	1	0.00083	0.033	phosphoprotein phosphatase activity	F
GO:0004722	37	0.0655	1	0.00673	0.559	0.0196	0.81	0.00622	0.378	0.342	1	0.0559	1	0.306	1	0.0437	1	protein serine/threonine phosphatase activity	F
GO:0004725	109	0.325	1	0.09	1	0.734	1	0.222	1	0.227	1	0.388	1	0.102	1	0.0198	1	protein tyrosine phosphatase activity	F
GO:0004745	10	0.165	1	0.153	1	0.13	1	0.0527	1	0.0496	1	0.15	1	0.565	1	0.555	1	retinol dehydrogenase activity	F
GO:0004765	12	0.0202	1	0.0256	1	0.0447	1	0.0586	1	0.0158	0.719	0.0448	1	0.0859	1	0.233	1	shikimate kinase activity	F
GO:0004806	15	0.472	1	0.996	1	0.424	1	0.993	1	0.954	1	1	1	0.205	1	0.826	1	triacylglycerol lipase activity	F
GO:0004812	69	0.00174	0.102	0.000206	0.028	0.00463	0.188	0.00019	0.011	0.00578	0.165	0.00496	0.202	0.0855	1	0.112	1	aminoacyl-tRNA ligase activity	F
GO:0004835	16	0.0843	1	0.168	1	0.0896	1	0.3	1	0.115	1	0.115	1	0.103	1	0.0997	1	tubulin-tyrosine ligase activity	F
GO:0004842	146	1.15e-05	0.005	1.41e-07	0.00266	3.15e-05	0.003	2.87e-06	0.001	2.34e-06	0.000765	1.9e-07	0.00175	0.0867	1	0.000479	0.021	ubiquitin-protein ligase activity	F
GO:0004843	67	0.0232	1	0.000152	0.028	0.0976	1	6.3e-05	0.0058	0.00358	0.135	0.00551	0.202	0.46	1	0.00616	0.258	ubiquitin-specific protease activity	F
GO:0004857	298	0.997	1	1	1	1	1	0.999	1	0.965	1	1	1	0.574	1	0.859	1	enzyme inhibitor activity	F
GO:0004859	11	0.879	1	0.593	1	0.961	1	0.995	1	0.564	1	0.484	1	0.98	1	0.39	1	phospholipase inhibitor activity	F
GO:0004860	22	0.308	1	0.677	1	0.293	1	0.0826	1	0.528	1	0.991	1	0.243	1	0.949	1	protein kinase inhibitor activity	F
GO:0004864	17	0.354	1	0.246	1	0.37	1	0.376	1	0.801	1	0.402	1	0.142	1	0.133	1	protein phosphatase inhibitor activity	F
GO:0004866	200	1	1	1	1	1	1	1	1	0.931	1	1	1	0.966	1	0.994	1	endopeptidase inhibitor activity	F
GO:0004867	139	1	1	1	1	1	1	1	1	1	1	1	1	0.774	1	0.998	1	serine-type endopeptidase inhibitor activity	F
GO:0004869	41	0.949	1	0.86	1	0.992	1	0.142	1	0.0501	1	1	1	0.993	1	0.826	1	cysteine protease inhibitor activity	F
GO:0004871	2382	1	1	1	1	1	1	1	1	1	1	1	1	0.82	1	0.938	1	signal transducer activity	F
GO:0004872	2044	1	1	1	1	1	1	1	1	1	1	1	1	0.933	1	0.988	1	receptor activity	F
GO:0004879	165	0.667	1	0.232	1	0.57	1	0.139	1	0.789	1	0.212	1	0.291	1	0.495	1	ligand-dependent nuclear receptor activity	F
GO:0004887	19	0.114	1	0.306	1	0.18	1	0.351	1	0.419	1	0.272	1	0.0309	0.753	0.389	1	thyroid hormone receptor activity	F
GO:0004888	1263	1	1	1	1	1	1	1	1	1	1	1	1	0.998	1	0.996	1	transmembrane receptor activity	F
GO:0004889	17	0.198	1	0.729	1	0.453	1	0.947	1	0.934	1	0.682	1	0.0358	0.753	0.323	1	nicotinic acetylcholine-activated cation-selective channel activity	F
GO:0004890	32	1	1	1	1	1	1	1	1	1	1	1	1	0.933	1	1	1	GABA-A receptor activity	F
GO:0004896	81	0.99	1	0.969	1	0.998	1	1	1	0.912	1	0.991	1	0.685	1	0.113	1	hematopoietin/interferon-class (D200-domain) cytokine receptor activity	F
GO:0004907	50	0.99	1	0.875	1	1	1	1	1	0.625	1	0.94	1	0.678	1	0.114	1	interleukin receptor activity	F
GO:0004908	27	1	1	1	1	1	1	1	1	0.996	1	0.998	1	1	1	0.925	1	interleukin-1 receptor activity	F
GO:0004918	10	0.143	1	0.108	1	1	1	0.52	1	0.0855	1	0.237	1	0.309	1	0.02	1	interleukin-8 receptor activity	F
GO:0004930	897	1	1	1	1	1	1	1	1	1	1	1	1	1	1	0.988	1	G-protein coupled receptor activity	F
GO:0004935	26	0.632	1	0.964	1	0.639	1	0.671	1	0.922	1	0.999	1	0.412	1	0.714	1	adrenoceptor activity	F
GO:0004936	10	0.71	1	0.825	1	0.512	1	0.448	1	0.878	1	1	1	0.406	1	0.38	1	alpha-adrenergic receptor activity	F
GO:0004942	17	0.00488	0.348	0.0163	1	0.0476	1	0.107	1	0.0363	1	0.103	1	0.0329	0.753	0.00461	0.258	anaphylatoxin receptor activity	F
GO:0004945	52	0.24	1	0.435	1	0.293	1	0.609	1	0.377	1	0.873	1	0.378	1	0.0578	1	angiotensin type II receptor activity	F
GO:0004946	17	0.998	1	1	1	1	1	1	1	0.982	1	1	1	0.414	1	1	1	bombesin receptor activity	F
GO:0004947	29	0.277	1	0.378	1	0.471	1	0.571	1	0.576	1	0.754	1	0.311	1	0.0631	1	bradykinin receptor activity	F
GO:0004949	23	0.994	1	0.397	1	0.909	1	0.255	1	0.99	1	0.766	1	0.992	1	0.26	1	cannabinoid receptor activity	F
GO:0004950	42	0.263	1	0.399	1	0.751	1	0.771	1	0.233	1	0.91	1	0.143	1	0.019	0.94	chemokine receptor activity	F
GO:0004952	52	0.846	1	0.61	1	0.834	1	0.319	1	0.964	1	0.853	1	0.714	1	0.524	1	dopamine receptor activity	F
GO:0004953	15	0.417	1	0.401	1	0.116	1	0.481	1	0.848	1	0.39	1	0.972	1	0.282	1	icosanoid receptor activity	F
GO:0004954	15	0.417	1	0.401	1	0.116	1	0.481	1	0.848	1	0.39	1	0.972	1	0.282	1	prostanoid receptor activity	F
GO:0004955	15	0.417	1	0.401	1	0.116	1	0.481	1	0.848	1	0.39	1	0.972	1	0.282	1	prostaglandin receptor activity	F
GO:0004957	11	0.323	1	0.519	1	0.0573	1	0.705	1	0.956	1	0.45	1	0.999	1	0.473	1	prostaglandin E receptor activity	F
GO:0004965	34	0.994	1	0.777	1	0.774	1	0.647	1	0.995	1	0.817	1	0.992	1	0.491	1	GABA-B receptor activity	F
GO:0004966	41	0.997	1	0.993	1	1	1	0.849	1	0.998	1	0.994	1	0.744	1	0.76	1	galanin receptor activity	F
GO:0004969	41	0.183	1	0.0343	1	0.44	1	0.0663	1	0.168	1	0.0697	1	0.331	1	0.134	1	histamine receptor activity	F
GO:0004970	18	0.734	1	1	1	0.994	1	0.82	1	0.72	1	1	1	0.0741	1	0.953	1	ionotropic glutamate receptor activity	F
GO:0004974	16	0.539	1	0.889	1	0.214	1	0.467	1	0.783	1	0.993	1	0.798	1	0.965	1	leukotriene receptor activity	F
GO:0004977	103	1	1	0.999	1	1	1	0.957	1	0.997	1	1	1	0.728	1	0.982	1	melanocortin receptor activity	F
GO:0004981	10	0.771	1	0.997	1	0.922	1	1	1	0.846	1	0.971	1	0.413	1	0.36	1	muscarinic acetylcholine receptor activity	F
GO:0004982	27	0.103	1	0.264	1	0.0601	1	0.443	1	0.895	1	0.465	1	0.147	1	0.0999	1	N-formyl peptide receptor activity	F
GO:0004983	81	0.998	1	0.965	1	0.999	1	0.997	1	0.983	1	0.993	1	0.536	1	0.286	1	neuropeptide Y receptor activity	F
GO:0004984	195	1	1	1	1	1	1	1	1	0.998	1	1	1	0.962	1	1	1	olfactory receptor activity	F
GO:0004985	16	0.998	1	0.932	1	1	1	1	1	0.998	1	0.58	1	0.929	1	0.625	1	opioid receptor activity	F
GO:0004992	13	0.627	1	0.267	1	0.943	1	0.428	1	0.806	1	0.347	1	0.187	1	0.0992	1	platelet activating factor receptor activity	F
GO:0004994	17	0.999	1	0.986	1	1	1	0.998	1	0.992	1	0.904	1	0.947	1	0.743	1	somatostatin receptor activity	F
GO:0005000	11	0.924	1	0.823	1	0.969	1	0.742	1	0.96	1	0.852	1	0.734	1	0.717	1	vasopressin receptor activity	F
GO:0005003	14	0.906	1	0.973	1	0.928	1	0.998	1	1	1	0.905	1	0.237	1	0.776	1	ephrin receptor activity	F
GO:0005021	65	1	1	1	1	1	1	1	1	0.984	1	1	1	0.914	1	0.77	1	vascular endothelial growth factor receptor activity	F
GO:0005024	13	0.269	1	0.318	1	0.627	1	0.292	1	0.394	1	0.304	1	0.569	1	0.532	1	transforming growth factor beta receptor activity	F
GO:0005044	34	0.475	1	0.803	1	0.387	1	0.995	1	0.748	1	0.836	1	0.213	1	0.139	1	scavenger receptor activity	F
GO:0005048	10	0.0725	1	0.00188	0.162	0.222	1	0.0724	1	0.0411	1	0.0131	1	0.388	1	0.158	1	signal sequence binding	F
GO:0005057	108	0.189	1	0.0952	1	0.311	1	0.15	1	0.736	1	0.406	1	0.0526	1	0.0263	1	receptor signaling protein activity	F
GO:0005070	17	0.191	1	0.506	1	0.174	1	0.266	1	0.437	1	0.881	1	0.19	1	0.327	1	SH3/SH2 adaptor activity	F
GO:0005083	215	0.000174	0.019	0.00849	0.559	0.0257	1	0.321	1	0.00434	0.135	0.0247	1	0.000176	0.00645	0.000312	0.017	small GTPase regulator activity	F
GO:0005085	157	0.523	1	0.758	1	0.82	1	0.969	1	0.441	1	0.764	1	0.282	1	0.253	1	guanyl-nucleotide exchange factor activity	F
GO:0005086	16	0.839	1	0.765	1	0.959	1	0.732	1	0.704	1	0.907	1	0.8	1	0.503	1	ARF guanyl-nucleotide exchange factor activity	F
GO:0005088	84	0.0822	1	0.349	1	0.611	1	0.939	1	0.176	1	0.157	1	0.00911	0.217	0.139	1	Ras guanyl-nucleotide exchange factor activity	F
GO:0005089	74	0.228	1	0.747	1	0.797	1	0.996	1	0.427	1	0.32	1	0.0237	0.56	0.495	1	Rho guanyl-nucleotide exchange factor activity	F
GO:0005096	199	0.00407	0.186	0.0708	1	0.0231	1	0.582	1	0.027	1	0.441	1	0.0366	0.783	0.0018	0.063	GTPase activator activity	F
GO:0005097	44	0.00269	0.139	0.00371	0.382	0.0146	0.81	0.036	1	0.0256	1	0.00856	0.355	0.0197	0.471	0.00774	0.448	Rab GTPase activator activity	F
GO:0005099	67	0.00158	0.093	0.00312	0.213	0.0116	0.474	0.0479	1	0.0182	0.719	0.0435	1	0.0224	0.56	0.000796	0.033	Ras GTPase activator activity	F
GO:0005100	17	0.206	1	0.267	1	0.181	1	0.365	1	0.433	1	0.904	1	0.345	1	0.0642	1	Rho GTPase activator activity	F
GO:0005102	776	1	1	1	1	0.999	1	1	1	1	1	1	1	0.998	1	0.869	1	receptor binding	F
GO:0005125	241	1	1	1	1	0.991	1	1	1	1	1	1	1	0.991	1	0.95	1	cytokine activity	F
GO:0005126	39	0.95	1	0.998	1	0.57	1	1	1	0.997	1	1	1	0.987	1	0.849	1	hematopoietin/interferon-class (D200-domain) cytokine receptor binding	F
GO:0005149	13	0.719	1	0.971	1	0.63	1	0.939	1	0.57	1	0.874	1	0.478	1	0.717	1	interleukin-1 receptor binding	F
GO:0005158	17	0.853	1	0.682	1	0.612	1	0.315	1	0.707	1	0.997	1	1	1	0.995	1	insulin receptor binding	F
GO:0005160	11	0.415	1	0.838	1	0.23	1	0.889	1	0.471	1	1	1	0.561	1	0.369	1	transforming growth factor beta receptor binding	F
GO:0005164	32	0.791	1	0.965	1	0.8	1	0.895	1	1	1	1	1	0.252	1	0.293	1	tumor necrosis factor receptor binding	F
GO:0005178	29	0.91	1	0.963	1	0.939	1	0.933	1	0.573	1	0.888	1	0.931	1	0.722	1	integrin binding	F
GO:0005179	161	0.99	1	1	1	0.986	1	0.998	1	0.702	1	1	1	0.998	1	0.989	1	hormone activity	F
GO:0005184	17	1	1	1	1	1	1	0.957	1	1	1	1	1	1	1	0.994	1	neuropeptide hormone activity	F
GO:0005198	739	0.744	1	0.91	1	0.896	1	0.511	1	0.432	1	0.986	1	0.83	1	0.879	1	structural molecule activity	F
GO:0005199	59	0.527	1	0.489	1	0.643	1	0.463	1	0.276	1	0.276	1	0.868	1	0.767	1	structural constituent of cell wall	F
GO:0005200	49	0.0528	1	0.615	1	0.101	1	0.521	1	0.122	1	0.787	1	0.0415	0.834	0.664	1	structural constituent of cytoskeleton	F
GO:0005201	49	0.712	1	1	1	0.466	1	1	1	0.851	1	1	1	0.639	1	0.995	1	extracellular matrix structural constituent	F
GO:0005212	20	0.46	1	0.982	1	0.701	1	0.736	1	0.498	1	0.919	1	0.334	1	0.872	1	structural constituent of eye lens	F
GO:0005215	1485	0.0474	1	0.433	1	0.911	1	0.478	1	0.462	1	0.953	1	0.000161	0.00645	0.0556	1	transporter activity	F
GO:0005216	424	0.249	1	1	1	0.989	1	0.999	1	0.604	1	1	1	0.00136	0.038	0.719	1	ion channel activity	F
GO:0005217	12	0.577	1	0.999	1	0.975	1	1	1	0.384	1	0.999	1	0.0924	1	0.847	1	intracellular ligand-gated ion channel activity	F
GO:0005230	71	0.819	1	1	1	0.982	1	1	1	0.976	1	0.998	1	0.0639	1	0.972	1	extracellular ligand-gated ion channel activity	F
GO:0005231	47	0.168	1	0.975	1	0.652	1	0.965	1	0.752	1	0.93	1	0.00296	0.0554	0.594	1	excitatory extracellular ligand-gated ion channel activity	F
GO:0005234	18	0.734	1	1	1	0.994	1	0.82	1	0.72	1	1	1	0.0741	1	0.953	1	glutamate-gated ion channel activity	F
GO:0005242	18	0.976	1	0.995	1	0.987	1	0.952	1	0.999	1	0.934	1	0.559	1	0.97	1	inward rectifier potassium channel activity	F
GO:0005244	256	0.343	1	0.991	1	0.97	1	0.988	1	0.455	1	1	1	0.0815	1	0.648	1	voltage-gated ion channel activity	F
GO:0005245	40	0.19	1	0.633	1	0.661	1	0.694	1	0.748	1	0.741	1	0.0112	0.439	0.235	1	voltage-gated calcium channel activity	F
GO:0005246	13	0.804	1	0.978	1	0.959	1	0.996	1	0.444	1	0.997	1	0.653	1	0.566	1	calcium channel regulator activity	F
GO:0005247	19	0.126	1	0.354	1	0.52	1	0.348	1	0.0877	1	0.32	1	0.149	1	0.324	1	voltage-gated chloride channel activity	F
GO:0005248	13	0.926	1	1	1	1	1	1	1	0.931	1	1	1	0.116	1	0.379	1	voltage-gated sodium channel activity	F
GO:0005249	191	0.623	1	1	1	0.974	1	0.999	1	0.689	1	1	1	0.34	1	0.998	1	voltage-gated potassium channel activity	F
GO:0005253	66	0.334	1	0.956	1	0.72	1	0.96	1	0.289	1	0.814	1	0.15	1	0.927	1	anion channel activity	F
GO:0005254	61	0.448	1	0.999	1	0.806	1	0.998	1	0.494	1	0.993	1	0.124	1	0.987	1	chloride channel activity	F
GO:0005261	324	0.196	1	0.998	1	0.95	1	0.996	1	0.633	1	1	1	0.0041	0.0775	0.541	1	cation channel activity	F
GO:0005262	88	0.131	1	0.488	1	0.704	1	0.645	1	0.242	1	0.812	1	0.00288	0.0554	0.0984	1	calcium channel activity	F
GO:0005267	213	0.629	1	1	1	0.988	1	0.999	1	0.755	1	1	1	0.185	1	0.996	1	potassium channel activity	F
GO:0005272	28	0.91	1	0.912	1	1	1	0.992	1	0.767	1	0.973	1	0.11	1	0.264	1	sodium channel activity	F
GO:0005275	72	0.956	1	0.858	1	0.999	1	0.981	1	0.999	1	0.847	1	0.352	1	0.267	1	amine transporter activity	F
GO:0005279	19	0.986	1	0.97	1	1	1	0.988	1	1	1	0.906	1	0.265	1	0.467	1	amino acid-polyamine transporter activity	F
GO:0005283	14	0.993	1	1	1	1	1	0.919	1	1	1	0.998	1	0.462	1	0.991	1	sodium:amino acid symporter activity	F
GO:0005310	57	0.564	1	0.994	1	0.544	1	0.983	1	0.776	1	0.998	1	0.486	1	0.899	1	dicarboxylic acid transporter activity	F
GO:0005313	10	0.998	1	0.997	1	0.99	1	0.991	1	0.991	1	0.987	1	0.901	1	0.909	1	L-glutamate transporter activity	F
GO:0005319	60	0.4	1	0.846	1	0.255	1	0.467	1	0.812	1	1	1	0.247	1	0.497	1	lipid transporter activity	F
GO:0005326	29	0.851	1	0.839	1	0.712	1	0.835	1	0.527	1	0.828	1	0.982	1	0.538	1	neurotransmitter transporter activity	F
GO:0005328	27	0.83	1	0.879	1	0.683	1	0.973	1	0.601	1	0.784	1	0.954	1	0.555	1	neurotransmitter:sodium symporter activity	F
GO:0005337	12	0.478	1	0.111	1	0.637	1	0.259	1	0.21	1	0.125	1	0.406	1	0.215	1	nucleoside transporter activity	F
GO:0005342	123	0.88	1	0.998	1	0.789	1	0.995	1	0.992	1	0.999	1	0.692	1	0.813	1	organic acid transporter activity	F
GO:0005343	73	0.591	1	0.998	1	0.422	1	0.965	1	0.888	1	1	1	0.661	1	0.944	1	organic acid:sodium symporter activity	F
GO:0005344	12	1	1	1	1	1	1	1	1	1	1	1	1	1	1	1	1	oxygen transporter activity	F
GO:0005351	44	0.109	1	0.583	1	0.5	1	0.853	1	0.276	1	0.641	1	0.0187	0.471	0.401	1	sugar porter activity	F
GO:0005355	12	0.106	1	0.867	1	0.307	1	0.97	1	0.262	1	0.779	1	0.0612	1	0.871	1	glucose transporter activity	F
GO:0005372	11	0.714	1	0.663	1	0.732	1	0.364	1	0.818	1	0.815	1	0.439	1	0.654	1	water transporter activity	F
GO:0005385	12	0.522	1	0.0695	1	0.231	1	0.0254	0.769	0.314	1	0.669	1	0.998	1	0.229	1	zinc ion transporter activity	F
GO:0005386	395	0.264	1	0.685	1	0.918	1	0.899	1	0.549	1	0.834	1	0.0228	0.56	0.233	1	carrier activity	F
GO:0005416	17	0.972	1	0.997	1	1	1	0.967	1	1	1	0.999	1	0.208	1	0.664	1	cation:amino acid symporter activity	F
GO:0005451	16	0.848	1	0.905	1	0.974	1	0.775	1	0.425	1	0.97	1	0.786	1	0.878	1	monovalent cation:proton antiporter activity	F
GO:0005452	16	0.695	1	0.401	1	0.833	1	0.457	1	1	1	0.382	1	0.275	1	0.399	1	inorganic anion exchanger activity	F
GO:0005478	28	0.0273	1	0.00187	0.162	0.0738	1	0.00416	0.142	0.0374	1	0.00416	0.152	0.0712	1	0.0227	1	intracellular transporter activity	F
GO:0005484	21	0.154	1	0.0847	1	0.325	1	0.16	1	0.13	1	0.128	1	0.196	1	0.0549	1	SNAP receptor activity	F
GO:0005488	12054	2.9e-28	0	0	0	2.17e-18	0	4.44e-32	0	6.99e-16	0	8.77e-23	0	4.26e-07	0.000633	1.46e-13	0	binding	F
GO:0005496	65	0.321	1	0.944	1	0.208	1	0.816	1	0.581	1	0.98	1	0.29	1	0.54	1	steroid binding	F
GO:0005501	17	0.877	1	0.925	1	0.826	1	0.494	1	0.92	1	0.795	1	0.631	1	0.898	1	retinoid binding	F
GO:0005504	20	0.0112	0.983	0.0954	1	0.101	1	0.299	1	0.0858	1	0.108	1	0.0323	0.753	0.273	1	fatty acid binding	F
GO:0005506	357	0.651	1	0.688	1	0.993	1	0.43	1	0.384	1	0.919	1	0.0535	1	0.425	1	iron ion binding	F
GO:0005507	75	0.983	1	1	1	0.809	1	0.996	1	1	1	1	1	0.664	1	0.898	1	copper ion binding	F
GO:0005509	962	0.0751	1	1	1	0.793	1	1	1	0.658	1	1	1	8.79e-07	0.000879	0.0804	1	calcium ion binding	F
GO:0005515	6722	3.31e-38	0	1.81e-37	0	2.93e-24	0	1.11e-24	0	1.64e-20	0	3.34e-16	0	1.59e-10	0	2.57e-16	0	protein binding	F
GO:0005516	120	0.114	1	0.817	1	0.457	1	0.995	1	0.0779	1	0.604	1	0.101	1	0.524	1	calmodulin binding	F
GO:0005520	24	1	1	0.991	1	1	1	0.999	1	1	1	0.962	1	0.862	1	0.818	1	insulin-like growth factor binding	F
GO:0005524	1514	3.61e-17	0	3.26e-25	0	4.44e-11	0	1.38e-15	0	7.89e-13	0	7.51e-17	0	1.84e-07	0.000633	1.05e-11	0	ATP binding	F
GO:0005525	366	6.77e-05	0.007	0.00012	0.028	0.000351	0.0161	0.000716	0.027	0.000349	0.019	0.00115	0.051	0.0481	1	0.107	1	GTP binding	F
GO:0005529	206	0.992	1	0.99	1	1	1	1	1	1	1	0.973	1	0.0476	1	0.344	1	sugar binding	F
GO:0005537	15	0.276	1	0.992	1	1	1	1	1	0.96	1	0.954	1	0.0106	0.262	0.542	1	mannose binding	F
GO:0005539	83	0.897	1	0.998	1	0.968	1	0.996	1	0.98	1	1	1	0.137	1	0.749	1	glycosaminoglycan binding	F
GO:0005540	17	0.505	1	0.406	1	0.627	1	0.409	1	0.558	1	0.548	1	0.322	1	0.194	1	hyaluronic acid binding	F
GO:0005542	11	0.0416	1	0.114	1	0.311	1	0.342	1	0.045	1	0.0744	1	0.0884	1	0.367	1	folic acid binding	F
GO:0005543	127	0.0678	1	0.000931	0.073	0.243	1	0.0459	1	0.152	1	0.00558	0.202	0.0518	1	0.00892	0.448	phospholipid binding	F
GO:0005544	23	0.648	1	0.367	1	0.775	1	0.567	1	0.243	1	0.429	1	0.492	1	0.126	1	calcium-dependent phospholipid binding	F
GO:0005545	10	0.686	1	0.14	1	0.994	1	0.534	1	0.38	1	0.102	1	0.552	1	0.0807	1	phosphatidylinositol binding	F
GO:0005548	19	0.455	1	0.845	1	0.694	1	0.983	1	0.795	1	0.87	1	0.139	1	0.647	1	phospholipid transporter activity	F
GO:0005549	39	1	1	1	1	1	1	1	1	1	1	1	1	1	1	1	1	odorant binding	F
GO:0005550	38	1	1	1	1	1	1	1	1	1	1	1	1	1	1	1	1	pheromone binding	F
GO:0005575	14763	6e-34	0	0	0	4.18e-16	0	1.8e-33	0	3.16e-18	0	7.16e-19	0	7.34e-11	0	9.61e-25	0	cellular_component	C
GO:0005576	2551	1	1	1	1	1	1	1	1	1	1	1	1	0.78	1	0.998	1	extracellular region	C
GO:0005578	314	0.999	1	1	1	0.999	1	1	1	1	1	1	1	0.282	1	0.999	1	extracellular matrix (sensu Metazoa)	C
GO:0005581	21	0.999	1	1	1	1	1	1	1	1	1	1	1	0.818	1	0.955	1	collagen	C
GO:0005604	70	1	1	1	1	1	1	1	1	0.994	1	0.998	1	0.558	1	0.883	1	basement membrane	C
GO:0005605	25	0.995	1	0.951	1	1	1	0.993	1	0.772	1	0.886	1	0.921	1	0.712	1	basal lamina	C
GO:0005615	1786	1	1	1	1	1	1	1	1	1	1	1	1	0.705	1	0.933	1	extracellular space	C
GO:0005622	9786	0	0	0	0	0	0	0	0	0	0	0	0	1.32e-11	0	5.52e-34	0	intracellular	C
GO:0005623	13388	1.33e-43	0	0	0	1.2e-21	0	0	0	1.92e-25	0	1.81e-29	0	1.05e-12	0	7.22e-29	0	cell	C
GO:0005624	497	0.301	1	0.198	1	0.902	1	0.54	1	0.208	1	0.253	1	0.068	1	0.127	1	membrane fraction	C
GO:0005625	97	0.0685	1	0.129	1	0.294	1	0.14	1	0.161	1	0.0448	1	0.144	1	0.755	1	soluble fraction	C
GO:0005626	21	0.0552	1	0.388	1	0.0932	1	0.444	1	0.171	1	0.44	1	0.312	1	0.14	1	insoluble fraction	C
GO:0005634	4334	2.48e-28	0	0	0	1.6e-29	0	0	0	2.72e-20	0	1.51e-43	0	0.0592	1	3.51e-11	0	nucleus	C
GO:0005635	167	3.84e-06	0.002	6.29e-15	0	2.04e-05	0.003	1.62e-10	0	0.000131	0.008	1.03e-09	0.000771	0.0425	0.834	5.18e-06	0.00391	nuclear envelope	C
GO:0005637	17	0.107	1	0.000591	0.073	0.0599	1	0.0229	0.769	0.205	1	0.00143	0.051	0.334	1	0.564	1	nuclear inner membrane	C
GO:0005640	11	0.0408	1	0.03	1	0.185	1	0.132	1	0.0752	1	0.118	1	0.0141	0.439	0.0629	1	nuclear outer membrane	C
GO:0005643	56	1.53e-09	0.000973	1.42e-18	0	4.38e-10	0	3.86e-15	0	8.37e-05	0.003	4.77e-12	0	0.0257	0.606	4.2e-06	0.00391	nuclear pore	C
GO:0005654	519	2.8e-08	0.000973	6.21e-19	0	2.47e-07	0.000988	2.56e-17	0	2.15e-05	0.00156	9.5e-11	0	0.0372	0.783	2.54e-05	0.00391	nucleoplasm	C
GO:0005657	27	0.012	0.983	0.0461	1	0.0457	1	0.232	1	0.0651	1	0.0356	1	0.0315	0.753	0.083	1	replication fork	C
GO:0005667	259	0.245	1	0.00184	0.162	0.283	1	0.00444	0.142	0.346	1	0.016	1	0.384	1	0.0507	1	transcription factor complex	C
GO:0005669	19	0.0129	0.983	0.00272	0.187	0.00609	0.188	0.00639	0.378	0.0863	1	0.0942	1	0.0316	0.753	0.37	1	transcription factor TFIID complex	C
GO:0005681	125	1.7e-05	0.005	2.59e-11	0.00266	0.000214	0.0161	2.16e-08	0	0.0058	0.165	1.9e-07	0.00175	0.147	1	0.0152	0.94	spliceosome complex	C
GO:0005689	14	0.00299	0.139	0.000976	0.073	0.00209	0.118	0.00268	0.142	0.194	1	0.0401	1	0.567	1	0.121	1	minor (U12-dependent) spliceosome complex	C
GO:0005694	396	1.39e-10	0.000662	1.01e-13	0	2.07e-10	0	7.69e-13	0	1.39e-07	0	4.44e-06	0.002	0.0484	1	0.00151	0.044	chromosome	C
GO:0005720	26	0.000688	0.052	0.000438	0.043	0.000779	0.03	0.00185	0.044	0.00157	0.048	0.00553	0.202	0.0744	1	0.0664	1	nuclear heterochromatin	C
GO:0005730	149	1.52e-05	0.005	1.61e-06	0.00266	1.44e-06	0.000988	7.57e-08	0	0.00313	0.135	4.71e-05	0.002	0.19	1	0.201	1	nucleolus	C
GO:0005732	14	0.311	1	0.0508	1	0.221	1	0.167	1	0.488	1	0.073	1	0.944	1	0.202	1	small nucleolar ribonucleoprotein complex	C
GO:0005737	6029	0	0	0	0	2.14e-33	0	0	0	6.46e-31	0	1.11e-40	0	1.87e-16	0	1e-31	0	cytoplasm	C
GO:0005739	952	4.9e-19	0	1.37e-33	0	1.85e-12	0	3.73e-18	0	2.1e-12	0	2.26e-22	0	4.41e-05	0.002	4.74e-14	0	mitochondrion	C
GO:0005740	395	5.5e-09	0.000973	2.48e-15	0	6.22e-06	0.00169	1.57e-10	0	2.69e-06	0.000765	6.23e-11	0	0.00324	0.0672	9.3e-06	0.00391	mitochondrial envelope	C
GO:0005741	65	0.000947	0.093	0.000309	0.042	0.0385	1	0.000475	0.0131	0.00114	0.044	0.00778	0.355	0.15	1	0.0126	0.94	mitochondrial outer membrane	C
GO:0005743	295	1.57e-06	0.002	2.94e-13	0	4.17e-05	0.003	7.64e-09	0	0.000274	0.008	5.76e-10	0.000771	0.0132	0.439	8.63e-05	0.00391	mitochondrial inner membrane	C
GO:0005746	56	0.00621	0.364	5.12e-08	0.00266	0.00926	0.469	2.7e-05	0.002	0.178	1	0.000101	0.00536	0.0892	1	0.00366	0.216	mitochondrial electron transport chain	C
GO:0005747	14	0.0207	1	0.00151	0.075	0.0248	1	0.000622	0.027	0.184	1	0.022	1	0.0597	1	0.0478	1	respiratory chain complex I (sensu Eukaryota)	C
GO:0005758	24	0.0183	0.983	0.0176	1	0.0648	1	0.0537	1	0.0391	1	0.0453	1	0.582	1	0.0688	1	mitochondrial intermembrane space	C
GO:0005759	153	4.48e-05	0.006	4.53e-08	0.00266	0.000154	0.0161	0.00166	0.044	0.00686	0.165	1.99e-06	0.002	0.078	1	0.000137	0.004	mitochondrial matrix	C
GO:0005761	44	0.00804	0.618	0.00219	0.162	0.00581	0.188	0.112	1	0.293	1	0.00335	0.143	0.255	1	0.0808	1	mitochondrial ribosome	C
GO:0005762	22	0.311	1	0.0673	1	0.311	1	0.401	1	0.293	1	0.0575	1	0.78	1	0.213	1	mitochondrial large ribosomal subunit	C
GO:0005763	14	0.038	1	0.00136	0.075	0.079	1	0.0427	1	0.388	1	0.0166	1	0.238	1	0.0462	1	mitochondrial small ribosomal subunit	C
GO:0005764	198	0.0029	0.139	0.000233	0.028	0.0908	1	0.0579	1	0.114	1	0.0841	1	0.0138	0.439	8.06e-05	0.00391	lysosome	C
GO:0005765	55	0.31	1	0.000802	0.073	0.378	1	0.044	1	0.689	1	0.0419	1	0.331	1	0.00214	0.063	lysosomal membrane	C
GO:0005768	200	0.00135	0.093	0.000888	0.073	0.016	0.81	0.000968	0.036	0.0233	1	0.0974	1	0.0366	0.783	0.00559	0.258	endosome	C
GO:0005769	59	0.00568	0.348	0.000178	0.028	0.00531	0.188	3.95e-05	0.00541	0.0242	1	0.00382	0.143	0.119	1	0.0356	1	early endosome	C
GO:0005770	59	0.31	1	0.00989	0.751	0.31	1	0.00334	0.142	0.759	1	0.457	1	0.441	1	0.0508	1	late endosome	C
GO:0005771	11	0.92	1	0.122	1	0.523	1	0.0231	0.769	0.999	1	0.842	1	0.982	1	0.265	1	multivesicular body	C
GO:0005773	219	0.0142	0.983	0.000676	0.073	0.191	1	0.0564	1	0.228	1	0.179	1	0.0322	0.753	0.000119	0.004	vacuole	C
GO:0005774	67	0.608	1	0.00807	0.559	0.638	1	0.0943	1	0.881	1	0.0892	1	0.498	1	0.00979	0.472	vacuolar membrane	C
GO:0005777	99	0.0053	0.348	9.95e-05	0.028	0.00288	0.127	0.0149	0.769	0.0133	0.481	0.000204	0.0136	0.148	1	0.0211	1	peroxisome	C
GO:0005778	40	0.0015	0.093	0.00685	0.559	0.00779	0.343	0.115	1	0.00784	0.318	0.0201	1	0.0503	1	0.054	1	peroxisomal membrane	C
GO:0005783	834	1.25e-05	0.005	2.58e-07	0.00266	0.0765	1	2.1e-05	0.00192	0.000373	0.019	0.00228	0.143	3.4e-05	0.002	7.5e-06	0.00391	endoplasmic reticulum	C
GO:0005788	60	0.0879	1	0.000587	0.073	0.431	1	0.00641	0.378	0.0977	1	0.00224	0.143	0.113	1	0.0483	1	endoplasmic reticulum lumen	C
GO:0005789	462	0.000381	0.052	0.000342	0.042	0.0583	1	0.00326	0.142	0.00132	0.048	0.0583	1	0.00232	0.0554	0.00255	0.087	endoplasmic reticulum membrane	C
GO:0005791	16	0.255	1	0.228	1	0.408	1	0.636	1	0.729	1	0.243	1	0.0807	1	0.187	1	rough endoplasmic reticulum	C
GO:0005792	172	0.831	1	0.5	1	1	1	0.896	1	0.33	1	0.585	1	0.129	1	0.091	1	microsome	C
GO:0005793	25	0.354	1	0.0539	1	0.377	1	0.0127	0.378	0.514	1	0.116	1	0.385	1	0.895	1	ER-Golgi intermediate compartment	C
GO:0005794	641	2.02e-06	0.002	4.01e-09	0.00266	0.0107	0.474	5.57e-07	0.001	0.000124	0.008	0.000388	0.02	0.000399	0.0189	2.48e-06	0.00391	Golgi apparatus	C
GO:0005795	19	0.0553	1	0.0993	1	0.114	1	0.0246	0.769	0.0432	1	0.119	1	0.912	1	0.834	1	Golgi stack	C
GO:0005798	43	0.000103	0.019	0.000481	0.043	0.0107	0.474	0.00102	0.036	0.000196	0.008	0.00466	0.202	0.00628	0.201	0.125	1	Golgi-associated vesicle	C
GO:0005801	12	0.011	0.983	0.00578	0.559	0.0193	0.81	0.0211	0.769	0.00119	0.044	0.0109	0.401	0.501	1	0.22	1	Golgi cis face	C
GO:0005802	41	0.00108	0.093	0.000382	0.043	0.0167	0.81	0.000142	0.0058	0.0777	1	0.00628	0.317	0.00297	0.0554	0.0365	1	Golgi trans face	C
GO:0005811	12	0.349	1	0.0695	1	0.581	1	0.317	1	0.199	1	0.167	1	0.649	1	0.212	1	lipid particle	C
GO:0005813	132	1.51e-06	0.002	4.44e-09	0.00266	1.16e-06	0.000988	1.74e-05	0.00192	6.36e-06	0.000962	4.39e-07	0.002	0.0309	0.753	0.000863	0.033	centrosome	C
GO:0005814	11	0.238	1	0.00554	0.559	0.0906	1	0.028	1	0.162	1	0.0342	1	0.672	1	0.0779	1	centriole	C
GO:0005815	150	2.16e-06	0.002	5.87e-07	0.00266	2.75e-06	0.00169	7.93e-05	0.0058	2.03e-05	0.00156	1.45e-05	0.002	0.0301	0.753	0.00525	0.258	microtubule organizing center	C
GO:0005819	85	3.18e-06	0.002	1.54e-07	0.00266	7.63e-07	0.000988	1.26e-06	0.001	0.000222	0.008	5.25e-05	0.00382	0.0727	1	0.00853	0.448	spindle	C
GO:0005829	462	4.49e-07	0.002	2.1e-06	0.00286	6.9e-06	0.00169	3.26e-05	0.00541	0.00187	0.054	8.71e-05	0.00536	0.00138	0.038	0.00874	0.448	cytosol	C
GO:0005833	12	1	1	1	1	1	1	1	1	1	1	1	1	1	1	1	1	hemoglobin complex	C
GO:0005834	37	0.727	1	0.864	1	0.547	1	0.867	1	0.897	1	0.757	1	0.371	1	0.891	1	heterotrimeric G-protein complex	C
GO:0005839	18	0.0261	1	0.00983	0.751	0.0692	1	0.212	1	0.228	1	0.00478	0.202	0.208	1	0.111	1	proteasome core complex (sensu Eukaryota)	C
GO:0005840	259	0.626	1	0.00616	0.559	0.422	1	0.0028	0.142	0.401	1	0.0811	1	1	1	0.54	1	ribosome	C
GO:0005856	1035	1.36e-09	0.000973	4.26e-06	0.00286	5.21e-07	0.000988	0.00022	0.011	2.74e-06	0.000765	0.000677	0.02	1.71e-05	0.002	0.000659	0.033	cytoskeleton	C
GO:0005863	15	0.917	1	1	1	1	1	0.883	1	0.786	1	1	1	0.287	1	0.83	1	striated muscle thick filament	C
GO:0005865	12	0.284	1	0.989	1	0.336	1	1	1	0.153	1	0.931	1	0.588	1	0.973	1	striated muscle thin filament	C
GO:0005871	12	0.00562	0.348	0.0431	1	0.0155	0.81	0.0315	1	0.152	1	0.0532	1	0.319	1	0.471	1	kinesin complex	C
GO:0005874	229	2.42e-10	0.000973	7.83e-09	0.00266	5.07e-08	0	1.8e-06	0.001	2.3e-06	0.000765	3.93e-05	0.002	4.82e-05	0.002	0.000184	0.007	microtubule	C
GO:0005875	112	7.02e-06	0.005	1.39e-05	0.007	0.000169	0.0161	0.000773	0.027	5.14e-05	0.00156	0.000299	0.0136	0.00489	0.0775	0.0374	1	microtubule associated complex	C
GO:0005876	14	1.52e-05	0.005	0.000179	0.028	1.21e-06	0.000988	0.00135	0.044	4.89e-05	0.00156	0.0119	1	0.0453	0.834	0.00713	0.258	spindle microtubule	C
GO:0005882	92	0.999	1	1	1	1	1	1	1	0.947	1	0.999	1	0.916	1	0.982	1	intermediate filament	C
GO:0005884	35	0.0202	1	0.224	1	0.154	1	0.722	1	0.109	1	0.439	1	0.0228	0.56	0.159	1	actin filament	C
GO:0005886	2561	0.999	1	1	1	1	1	1	1	1	1	1	1	0.0433	0.834	0.261	1	plasma membrane	C
GO:0005887	490	0.918	1	1	1	0.999	1	0.999	1	0.834	1	1	1	0.124	1	0.839	1	integral to plasma membrane	C
GO:0005891	27	0.756	1	0.933	1	0.995	1	0.995	1	0.944	1	0.956	1	0.144	1	0.443	1	voltage-gated calcium channel complex	C
GO:0005892	13	0.369	1	0.9	1	0.666	1	0.966	1	0.987	1	0.874	1	0.0213	0.529	0.499	1	nicotinic acetylcholine-gated receptor-channel complex	C
GO:0005901	33	0.02	1	0.0601	1	0.0499	1	0.0822	1	0.145	1	0.144	1	0.0131	0.439	0.239	1	caveola	C
GO:0005902	18	0.528	1	0.646	1	0.61	1	0.617	1	0.471	1	0.793	1	0.295	1	0.821	1	microvillus	C
GO:0005903	28	0.238	1	0.612	1	0.185	1	0.871	1	0.414	1	0.419	1	0.25	1	0.423	1	brush border	C
GO:0005905	33	0.051	1	0.0623	1	0.0673	1	0.0745	1	0.435	1	0.427	1	0.079	1	0.124	1	coated pit	C
GO:0005911	174	0.749	1	0.518	1	0.909	1	0.27	1	0.977	1	0.979	1	0.0279	0.606	0.257	1	intercellular junction	C
GO:0005912	79	0.0924	1	0.16	1	0.286	1	0.133	1	0.343	1	0.721	1	0.03	0.753	0.144	1	adherens junction	C
GO:0005913	30	0.677	1	0.394	1	0.73	1	0.144	1	0.685	1	0.638	1	0.397	1	0.654	1	cell-cell adherens junction	C
GO:0005921	28	0.627	1	0.563	1	0.967	1	0.429	1	0.425	1	0.649	1	0.31	1	0.753	1	gap junction	C
GO:0005922	22	0.921	1	0.721	1	1	1	0.561	1	0.599	1	0.891	1	0.61	1	0.787	1	connexon complex	C
GO:0005923	88	0.546	1	0.265	1	0.478	1	0.218	1	0.995	1	0.933	1	0.0404	0.834	0.0724	1	tight junction	C
GO:0005924	45	0.0536	1	0.315	1	0.159	1	0.361	1	0.43	1	0.685	1	0.0167	0.471	0.25	1	cell-substrate adherens junction	C
GO:0005925	41	0.102	1	0.631	1	0.378	1	0.849	1	0.355	1	0.974	1	0.0184	0.471	0.153	1	focal adhesion	C
GO:0005929	96	0.00412	0.186	0.0454	1	0.0115	0.474	0.0278	1	0.0876	1	0.0784	1	0.0484	1	0.232	1	cilium	C
GO:0005930	16	0.847	1	0.458	1	0.916	1	0.348	1	0.203	1	0.428	1	0.967	1	0.827	1	axoneme	C
GO:0005932	14	0.448	1	0.749	1	0.298	1	0.727	1	0.593	1	0.795	1	0.861	1	0.647	1	basal body	C
GO:0005938	90	0.316	1	0.163	1	0.509	1	0.15	1	0.931	1	0.612	1	0.0796	1	0.136	1	cell cortex	C
GO:0005941	44	0.0636	1	0.531	1	0.0692	1	0.628	1	0.237	1	0.487	1	0.0805	1	0.6	1	unlocalized protein complex	C
GO:0005942	18	0.0293	1	0.0345	1	0.188	1	0.0984	1	0.138	1	0.0965	1	0.0307	0.753	0.0322	1	phosphoinositide 3-kinase complex	C
GO:0005952	21	0.901	1	0.578	1	0.999	1	0.785	1	0.475	1	0.693	1	0.653	1	0.115	1	cAMP-dependent protein kinase complex	C
GO:0005964	15	0.17	1	0.909	1	0.3	1	0.989	1	0.112	1	0.548	1	0.361	1	0.873	1	phosphorylase kinase complex	C
GO:0005975	477	0.0114	0.983	0.0295	1	0.0696	1	0.293	1	0.0552	1	0.0188	1	0.052	1	0.0542	1	carbohydrate metabolism	P
GO:0005976	76	0.269	1	0.919	1	0.493	1	0.985	1	0.119	1	0.719	1	0.393	1	0.676	1	polysaccharide metabolism	P
GO:0005977	46	0.0729	1	0.857	1	0.314	1	0.887	1	0.0383	1	0.776	1	0.0973	1	0.603	1	glycogen metabolism	P
GO:0005978	26	0.106	1	0.963	1	0.281	1	0.997	1	0.0633	1	0.733	1	0.151	1	0.633	1	glycogen biosynthesis	P
GO:0005996	182	0.0358	1	0.159	1	0.212	1	0.636	1	0.0797	1	0.0884	1	0.0653	1	0.329	1	monosaccharide metabolism	P
GO:0006006	137	0.0668	1	0.314	1	0.488	1	0.855	1	0.142	1	0.109	1	0.0372	0.783	0.572	1	glucose metabolism	P
GO:0006007	67	0.01	0.983	0.133	1	0.0444	1	0.348	1	0.101	1	0.0442	1	0.0239	0.56	0.465	1	glucose catabolism	P
GO:0006013	10	0.138	1	0.0118	0.751	0.12	1	0.0148	0.769	0.276	1	0.113	1	0.307	1	0.059	1	mannose metabolism	P
GO:0006020	12	0.457	1	0.299	1	0.15	1	0.493	1	0.483	1	0.346	1	0.932	1	0.435	1	myo-inositol metabolism	P
GO:0006022	29	0.719	1	0.594	1	0.877	1	0.646	1	0.27	1	0.825	1	0.94	1	0.395	1	aminoglycan metabolism	P
GO:0006023	14	0.498	1	0.383	1	0.732	1	0.363	1	0.228	1	0.723	1	0.838	1	0.353	1	aminoglycan biosynthesis	P
GO:0006024	14	0.498	1	0.383	1	0.732	1	0.363	1	0.228	1	0.723	1	0.838	1	0.353	1	glycosaminoglycan biosynthesis	P
GO:0006029	27	0.99	1	0.765	1	0.996	1	0.909	1	0.624	1	0.83	1	0.96	1	0.362	1	proteoglycan metabolism	P
GO:0006030	12	1	1	0.998	1	0.993	1	0.998	1	1	1	0.983	1	1	1	0.876	1	chitin metabolism	P
GO:0006032	10	1	1	0.996	1	0.979	1	0.995	1	1	1	0.982	1	1	1	0.853	1	chitin catabolism	P
GO:0006040	33	0.727	1	0.526	1	0.558	1	0.398	1	0.933	1	0.758	1	0.57	1	0.395	1	amino sugar metabolism	P
GO:0006041	26	0.799	1	0.431	1	0.29	1	0.23	1	0.95	1	0.747	1	0.909	1	0.451	1	glucosamine metabolism	P
GO:0006043	11	1	1	0.865	1	0.98	1	0.834	1	0.99	1	0.882	1	1	1	0.665	1	glucosamine catabolism	P
GO:0006044	26	0.799	1	0.431	1	0.29	1	0.23	1	0.95	1	0.747	1	0.909	1	0.451	1	N-acetylglucosamine metabolism	P
GO:0006046	10	1	1	0.996	1	0.979	1	0.995	1	1	1	0.982	1	1	1	0.853	1	N-acetylglucosamine catabolism	P
GO:0006066	382	0.0569	1	0.296	1	0.262	1	0.671	1	0.268	1	0.196	1	0.0478	1	0.518	1	alcohol metabolism	P
GO:0006071	32	0.0279	1	0.163	1	0.0518	1	0.0571	1	0.393	1	0.423	1	0.0657	1	0.344	1	glycerol metabolism	P
GO:0006072	17	0.299	1	0.327	1	0.427	1	0.285	1	0.509	1	0.538	1	0.268	1	0.496	1	glycerol-3-phosphate metabolism	P
GO:0006073	46	0.0729	1	0.857	1	0.314	1	0.887	1	0.0383	1	0.776	1	0.0973	1	0.603	1	glucan metabolism	P
GO:0006081	16	0.564	1	0.114	1	0.555	1	0.496	1	0.636	1	0.0787	1	0.345	1	0.104	1	aldehyde metabolism	P
GO:0006082	633	0.00279	0.139	0.00126	0.075	0.0566	1	0.0511	1	0.0324	1	0.00223	0.143	0.00345	0.0672	0.000481	0.021	organic acid metabolism	P
GO:0006084	33	0.133	1	0.0985	1	0.0607	1	0.0645	1	0.348	1	0.299	1	0.278	1	0.0616	1	acetyl-CoA metabolism	P
GO:0006090	30	0.223	1	0.733	1	0.774	1	0.802	1	0.301	1	0.935	1	0.0745	1	0.36	1	pyruvate metabolism	P
GO:0006091	236	0.000134	0.019	0.0286	1	0.0775	1	0.184	1	0.0025	0.135	0.035	1	0.00242	0.0554	0.0842	1	generation of precursor metabolites and energy	P
GO:0006092	116	0.00123	0.093	0.0428	1	0.0176	0.81	0.124	1	0.0346	1	0.0411	1	0.00715	0.201	0.124	1	main pathways of carbohydrate metabolism	P
GO:0006094	24	0.115	1	0.561	1	0.705	1	0.591	1	0.202	1	0.842	1	0.0429	0.834	0.32	1	gluconeogenesis	P
GO:0006096	59	0.0448	1	0.366	1	0.0852	1	0.732	1	0.208	1	0.123	1	0.0519	1	0.561	1	glycolysis	P
GO:0006099	23	0.024	1	0.0414	1	0.0245	1	0.00884	0.378	0.186	1	0.21	1	0.0821	1	0.0502	1	tricarboxylic acid cycle	P
GO:0006100	19	0.18	1	0.135	1	0.277	1	0.356	1	0.103	1	0.28	1	0.357	1	0.0418	1	tricarboxylic acid cycle intermediate metabolism	P
GO:0006109	13	0.261	1	0.333	1	0.914	1	0.756	1	0.379	1	0.789	1	0.0734	1	0.0512	1	regulation of carbohydrate metabolism	P
GO:0006112	50	0.0707	1	0.927	1	0.345	1	0.913	1	0.0283	1	0.82	1	0.086	1	0.763	1	energy reserve metabolism	P
GO:0006118	30	0.0134	0.983	0.00623	0.559	0.208	1	0.0247	0.769	0.0485	1	0.046	1	0.0752	1	0.0342	1	electron transport	P
GO:0006119	55	0.131	1	0.0614	1	0.774	1	0.26	1	0.172	1	0.126	1	0.133	1	0.118	1	oxidative phosphorylation	P
GO:0006120	11	0.0487	1	0.175	1	0.353	1	0.327	1	0.194	1	0.366	1	0.0798	1	0.123	1	mitochondrial electron transport, NADH to ubiquinone	P
GO:0006139	3589	9.47e-12	0.000662	1.17e-32	0	4.59e-12	0	1.01e-31	0	3.57e-10	0	5.92e-21	0	0.263	1	0.00535	0.258	nucleobase, nucleoside, nucleotide and nucleic acid metabolism	P
GO:0006140	18	0.208	1	0.657	1	0.724	1	0.994	1	0.243	1	0.434	1	0.293	1	0.829	1	regulation of nucleotide metabolism	P
GO:0006163	82	0.088	1	0.0115	0.751	0.579	1	0.0162	0.769	0.0368	1	0.0245	1	0.439	1	0.104	1	purine nucleotide metabolism	P
GO:0006164	66	0.147	1	0.0323	1	0.643	1	0.046	1	0.0508	1	0.0808	1	0.537	1	0.136	1	purine nucleotide biosynthesis	P
GO:0006171	20	0.867	1	0.991	1	0.995	1	0.901	1	0.925	1	1	1	0.936	1	0.951	1	cAMP biosynthesis	P
GO:0006182	13	0.812	1	0.99	1	0.957	1	0.974	1	0.998	1	1	1	0.182	1	0.987	1	cGMP biosynthesis	P
GO:0006183	12	0.103	1	0.0666	1	0.0881	1	0.0737	1	0.0699	1	0.081	1	0.491	1	0.276	1	GTP biosynthesis	P
GO:0006206	10	0.43	1	0.218	1	0.0926	1	0.16	1	0.496	1	0.259	1	0.976	1	0.36	1	pyrimidine base metabolism	P
GO:0006220	23	0.0814	1	0.0217	1	0.0623	1	0.0483	1	0.0634	1	0.0135	1	0.327	1	0.157	1	pyrimidine nucleotide metabolism	P
GO:0006221	20	0.0461	1	0.0114	0.751	0.0295	1	0.0246	0.769	0.041	1	0.0153	1	0.316	1	0.0757	1	pyrimidine nucleotide biosynthesis	P
GO:0006228	11	0.104	1	0.102	1	0.0589	1	0.163	1	0.0518	1	0.0912	1	0.768	1	0.283	1	UTP biosynthesis	P
GO:0006241	12	0.0992	1	0.0731	1	0.0469	1	0.104	1	0.0629	1	0.0678	1	0.771	1	0.286	1	CTP biosynthesis	P
GO:0006259	705	2.21e-20	0	4.59e-26	0	4.24e-18	0	7.75e-20	0	2.98e-13	0	9.13e-14	0	0.000255	0.017	1.49e-08	0	DNA metabolism	P
GO:0006260	166	2.04e-09	0.000973	2.22e-11	0.00266	3.77e-08	0	4.47e-08	0	9.37e-06	0.00156	1.98e-09	0.000771	0.0018	0.0554	0.000137	0.004	DNA replication	P
GO:0006261	73	0.000283	0.019	3.75e-05	0.028	0.0119	0.474	0.00107	0.036	0.000983	0.044	0.000967	0.048	0.0117	0.439	0.00683	0.258	DNA-dependent DNA replication	P
GO:0006265	22	0.115	1	0.0822	1	0.0636	1	0.45	1	0.258	1	0.0521	1	0.388	1	0.553	1	DNA topological change	P
GO:0006268	11	0.0509	1	0.0124	0.751	0.487	1	0.0254	0.769	0.015	0.481	0.0407	1	0.247	1	0.216	1	DNA unwinding during replication	P
GO:0006270	20	0.0188	0.983	0.0108	0.751	0.0789	1	0.00858	0.378	0.00686	0.165	0.103	1	0.572	1	0.0333	1	DNA replication initiation	P
GO:0006275	30	0.00903	0.983	0.123	1	0.0535	1	0.345	1	0.0456	1	0.233	1	0.0519	1	0.0801	1	regulation of DNA replication	P
GO:0006281	238	6.78e-09	0.000973	1.15e-12	0	2.57e-07	0.000988	4.7e-08	0	5.43e-07	0.000765	9.2e-11	0	0.00717	0.201	0.00224	0.063	DNA repair	P
GO:0006284	23	0.272	1	0.222	1	0.0895	1	0.557	1	0.387	1	0.098	1	0.555	1	0.69	1	base-excision repair	P
GO:0006289	32	0.00811	0.618	0.02	1	0.00126	0.079	0.074	1	0.0634	1	0.11	1	0.715	1	0.0488	1	nucleotide-excision repair	P
GO:0006298	14	0.0254	1	0.00321	0.213	0.0807	1	0.011	0.378	0.0348	1	0.00697	0.355	0.0369	0.783	0.0379	1	mismatch repair	P
GO:0006302	31	0.00191	0.102	0.000565	0.073	0.0356	1	0.00224	0.045	0.00402	0.135	0.00146	0.051	0.0902	1	0.0055	0.258	double-strand break repair	P
GO:0006304	34	0.486	1	0.697	1	0.69	1	0.846	1	0.15	1	0.688	1	0.514	1	0.29	1	DNA modification	P
GO:0006305	33	0.511	1	0.687	1	0.686	1	0.816	1	0.16	1	0.712	1	0.583	1	0.285	1	DNA alkylation	P
GO:0006306	33	0.511	1	0.687	1	0.686	1	0.816	1	0.16	1	0.712	1	0.583	1	0.285	1	DNA methylation	P
GO:0006308	17	0.213	1	0.333	1	0.251	1	0.365	1	0.324	1	0.808	1	0.164	1	0.708	1	DNA catabolism	P
GO:0006310	85	2.18e-05	0.005	2.93e-06	0.00286	0.00239	0.118	1.04e-06	0.001	0.0047	0.135	0.0016	0.051	0.00692	0.201	0.000706	0.033	DNA recombination	P
GO:0006323	281	1.63e-08	0.000973	9.08e-13	0	1.74e-08	0	4.75e-11	0	3.93e-05	0.00156	6.4e-06	0.002	0.163	1	2.63e-05	0.00391	DNA packaging	P
GO:0006325	279	3.08e-08	0.000973	9.58e-13	0	3.87e-08	0	4.82e-11	0	3.84e-05	0.00156	7.29e-06	0.002	0.202	1	2.73e-05	0.00391	establishment and/or maintenance of chromatin architecture	P
GO:0006333	134	0.0011	0.093	0.000174	0.028	0.00138	0.079	0.00075	0.027	0.0294	1	0.0109	0.401	0.215	1	0.0522	1	chromatin assembly or disassembly	P
GO:0006334	88	0.0542	1	0.0948	1	0.0668	1	0.0113	0.378	0.105	1	0.151	1	0.788	1	0.884	1	nucleosome assembly	P
GO:0006338	47	0.000122	0.019	1.27e-09	0.00266	4.18e-05	0.003	3.39e-05	0.00541	0.00585	0.165	1.1e-05	0.002	0.222	1	0.000754	0.033	chromatin remodeling	P
GO:0006342	15	0.0659	1	0.000309	0.042	0.0887	1	0.0502	1	0.149	1	0.0109	0.401	0.226	1	0.00404	0.216	chromatin silencing	P
GO:0006350	2465	0.266	1	7.32e-08	0.00266	0.0213	1	5.19e-11	0	0.183	1	1.53e-05	0.002	0.982	1	0.611	1	transcription	P
GO:0006351	2286	0.339	1	2.78e-07	0.00266	0.0518	1	1.2e-09	0	0.187	1	1.19e-05	0.002	0.982	1	0.615	1	transcription, DNA-dependent	P
GO:0006352	50	0.00011	0.019	4.91e-06	0.00286	2.62e-05	0.003	3.77e-05	0.00541	0.0657	1	0.00486	0.202	0.0249	0.56	0.127	1	transcription initiation	P
GO:0006354	11	0.0348	1	0.00158	0.075	0.0599	1	0.00454	0.142	0.672	1	0.02	1	0.0311	0.753	0.405	1	RNA elongation	P
GO:0006355	2255	0.428	1	2.53e-06	0.00286	0.094	1	7.32e-09	0	0.231	1	8.66e-05	0.00536	0.981	1	0.693	1	regulation of transcription, DNA-dependent	P
GO:0006357	502	0.943	1	0.824	1	0.977	1	0.331	1	0.974	1	0.982	1	0.86	1	0.864	1	regulation of transcription from RNA polymerase II promoter	P
GO:0006360	10	0.213	1	0.41	1	0.315	1	0.122	1	0.317	1	0.896	1	0.399	1	0.967	1	transcription from RNA polymerase I promoter	P
GO:0006364	65	0.00196	0.102	0.000776	0.073	0.0481	1	9.8e-05	0.0058	0.00592	0.165	0.0417	1	0.121	1	0.666	1	rRNA processing	P
GO:0006366	549	0.698	1	0.417	1	0.635	1	0.077	1	0.844	1	0.855	1	0.854	1	0.808	1	transcription from RNA polymerase II promoter	P
GO:0006367	23	0.00153	0.093	0.000205	0.028	0.00184	0.118	0.00108	0.036	0.0372	1	0.0601	1	0.219	1	0.113	1	transcription initiation from RNA polymerase II promoter	P
GO:0006376	10	0.535	1	0.411	1	0.899	1	0.32	1	0.331	1	0.409	1	0.321	1	0.582	1	mRNA splice site selection	P
GO:0006396	392	6.97e-11	0.000662	2.9e-26	0	1.99e-08	0	2.58e-20	0	1.15e-06	0.000765	3.02e-16	0	0.0879	1	0.000654	0.033	RNA processing	P
GO:0006397	235	1.28e-08	0.000973	4.95e-18	0	1.85e-06	0.000988	6.1e-16	0	0.000152	0.008	6.76e-12	0	0.104	1	0.0438	1	mRNA processing	P
GO:0006399	124	0.000284	0.019	7.37e-07	0.00266	0.00131	0.079	2.17e-05	0.00192	0.000682	0.044	0.000199	0.0136	0.108	1	0.00227	0.063	tRNA metabolism	P
GO:0006400	11	0.358	1	0.0232	1	0.106	1	0.188	1	0.125	1	0.0458	1	1	1	0.0541	1	tRNA modification	P
GO:0006401	33	0.0124	0.983	0.0238	1	0.0372	1	0.0251	0.769	0.0624	1	0.44	1	0.0176	0.471	0.127	1	RNA catabolism	P
GO:0006402	27	0.0506	1	0.105	1	0.0509	1	0.0645	1	0.16	1	0.76	1	0.154	1	0.249	1	mRNA catabolism	P
GO:0006403	60	1.23e-05	0.005	2.98e-08	0.00266	1.54e-05	0.00169	6.47e-08	0	0.000806	0.044	2.09e-06	0.002	0.196	1	0.228	1	RNA localization	P
GO:0006405	20	0.00418	0.186	0.00176	0.162	0.00441	0.188	0.000123	0.0058	0.0298	1	0.0352	1	0.208	1	0.353	1	RNA export from nucleus	P
GO:0006406	15	0.105	1	0.019	1	0.0182	0.81	0.000146	0.0058	0.155	1	0.104	1	0.891	1	0.568	1	mRNA export from nucleus	P
GO:0006412	689	0.0557	1	3.74e-07	0.00266	0.00572	0.188	1.14e-05	0.00177	0.0975	1	7.06e-05	0.00536	0.983	1	0.0497	1	protein biosynthesis	P
GO:0006413	60	0.00284	0.139	5.26e-06	0.003	0.0125	0.474	0.0386	1	0.00037	0.019	7.99e-08	0.000771	0.755	1	0.257	1	translational initiation	P
GO:0006414	21	0.752	1	0.0431	1	0.36	1	0.0462	1	0.546	1	0.462	1	1	1	0.196	1	translational elongation	P
GO:0006417	154	0.137	1	0.114	1	0.0465	1	0.118	1	0.322	1	0.11	1	0.484	1	0.307	1	regulation of protein biosynthesis	P
GO:0006418	67	0.00201	0.102	0.000109	0.028	0.0073	0.283	0.000105	0.0058	0.00465	0.135	0.00349	0.143	0.0833	1	0.0897	1	tRNA aminoacylation for protein translation	P
GO:0006445	31	0.00974	0.983	0.000254	0.028	0.0267	1	0.000243	0.0115	0.00915	0.369	0.00275	0.143	0.761	1	0.112	1	regulation of translation	P
GO:0006446	22	0.00255	0.139	0.00083	0.073	0.00464	0.188	0.00149	0.044	0.00376	0.135	0.00102	0.048	0.842	1	0.0928	1	regulation of translational initiation	P
GO:0006457	143	0.000231	0.019	4.37e-09	0.00266	0.0149	0.81	7.36e-06	0.00177	0.000944	0.044	5.42e-06	0.002	0.177	1	0.00612	0.258	protein folding	P
GO:0006461	282	0.00335	0.186	0.0244	1	0.0348	1	0.0185	0.769	0.013	0.481	0.145	1	0.599	1	0.234	1	protein complex assembly	P
GO:0006464	1738	3.24e-12	0.000662	1.17e-23	0	4.9e-09	0	2.78e-14	0	5.5e-09	0	6.66e-15	0	0.000876	0.024	3.39e-13	0	protein modification	P
GO:0006468	728	0.0987	1	0.0104	0.751	0.463	1	0.225	1	0.193	1	0.0188	1	0.0322	0.753	0.01	0.472	protein amino acid phosphorylation	P
GO:0006469	50	0.251	1	0.311	1	0.348	1	0.0697	1	0.651	1	0.896	1	0.12	1	0.711	1	negative regulation of protein kinase activity	P
GO:0006470	133	0.0425	1	0.00904	0.559	0.217	1	0.0855	1	0.0529	1	0.0771	1	0.0376	0.783	0.00302	0.216	protein amino acid dephosphorylation	P
GO:0006471	16	0.392	1	0.137	1	0.419	1	0.0465	1	0.735	1	0.539	1	0.153	1	0.295	1	protein amino acid ADP-ribosylation	P
GO:0006473	16	0.0368	1	0.0405	1	0.046	1	0.0558	1	0.14	1	0.0221	1	0.239	1	0.116	1	protein amino acid acetylation	P
GO:0006476	18	0.0118	0.983	0.00846	0.559	0.0499	1	0.0219	0.769	0.0168	0.719	0.0679	1	0.236	1	0.0331	1	protein amino acid deacetylation	P
GO:0006479	35	0.00196	0.102	0.000302	0.042	0.00556	0.188	0.0032	0.142	0.00352	0.135	0.000525	0.02	0.0797	1	0.0161	0.94	protein amino acid methylation	P
GO:0006486	83	0.613	1	0.0425	1	0.592	1	0.161	1	0.955	1	0.135	1	0.141	1	0.00407	0.216	protein amino acid glycosylation	P
GO:0006487	21	0.328	1	0.00165	0.075	0.221	1	0.0324	1	0.648	1	0.00354	0.143	0.328	1	0.000635	0.033	protein amino acid N-linked glycosylation	P
GO:0006493	15	0.466	1	0.319	1	0.473	1	0.315	1	0.239	1	0.388	1	0.875	1	0.323	1	protein amino acid O-linked glycosylation	P
GO:0006497	47	0.185	1	0.0513	1	0.038	1	0.0512	1	0.332	1	0.161	1	0.837	1	0.19	1	protein amino acid lipidation	P
GO:0006505	27	0.0788	1	0.0169	1	0.022	1	0.028	1	0.236	1	0.0606	1	0.451	1	0.28	1	GPI anchor metabolism	P
GO:0006506	23	0.0473	1	0.00339	0.213	0.0111	0.474	0.013	0.378	0.169	1	0.0348	1	0.496	1	0.174	1	GPI anchor biosynthesis	P
GO:0006508	799	0.118	1	0.0109	0.751	0.266	1	0.188	1	0.56	1	0.21	1	0.0225	0.56	0.000224	0.017	proteolysis	P
GO:0006509	13	0.663	1	0.813	1	0.613	1	0.984	1	0.993	1	0.973	1	0.225	1	0.832	1	membrane protein ectodomain proteolysis	P
GO:0006511	152	1.74e-06	0.002	3.96e-11	0.00266	1.88e-05	0.003	2.01e-08	0	1.29e-06	0.000765	2.22e-07	0.00175	0.252	1	0.000105	0.004	ubiquitin-dependent protein catabolism	P
GO:0006512	529	5.83e-14	0.000662	3.62e-24	0	7.01e-13	0	1.93e-17	0	3.82e-14	0	1.17e-17	0	0.064	1	7.89e-09	0	ubiquitin cycle	P
GO:0006515	12	0.0818	1	0.00113	0.073	0.045	1	0.000859	0.027	0.255	1	0.0397	1	0.679	1	0.0249	1	misfolded or incompletely synthesized protein catabolism	P
GO:0006516	10	0.51	1	0.00774	0.559	0.178	1	0.0627	1	0.755	1	0.101	1	0.537	1	0.0306	1	glycoprotein catabolism	P
GO:0006518	14	0.501	1	0.597	1	1	1	0.635	1	0.178	1	0.492	1	0.757	1	0.51	1	peptide metabolism	P
GO:0006519	454	0.0608	1	0.0668	1	0.226	1	0.142	1	0.375	1	0.108	1	0.0387	0.783	0.0978	1	amino acid and derivative metabolism	P
GO:0006520	368	0.052	1	0.0294	1	0.0919	1	0.132	1	0.185	1	0.0242	1	0.0838	1	0.103	1	amino acid metabolism	P
GO:0006521	96	1	1	0.996	1	1	1	0.994	1	1	1	1	1	0.721	1	0.676	1	regulation of amino acid metabolism	P
GO:0006536	10	0.125	1	0.265	1	0.699	1	0.177	1	0.223	1	0.304	1	0.153	1	0.475	1	glutamate metabolism	P
GO:0006541	17	0.392	1	0.0196	1	0.36	1	0.0322	1	0.358	1	0.0926	1	0.726	1	0.0384	1	glutamine metabolism	P
GO:0006544	12	0.342	1	0.0413	1	0.152	1	0.141	1	0.471	1	0.00905	0.355	0.642	1	0.125	1	glycine metabolism	P
GO:0006547	11	0.898	1	0.6	1	0.825	1	0.447	1	0.982	1	0.767	1	0.376	1	0.374	1	histidine metabolism	P
GO:0006548	11	0.898	1	0.6	1	0.825	1	0.447	1	0.982	1	0.767	1	0.376	1	0.374	1	histidine catabolism	P
GO:0006570	14	0.69	1	0.705	1	0.509	1	0.866	1	0.919	1	0.589	1	0.68	1	0.458	1	tyrosine metabolism	P
GO:0006575	153	0.188	1	0.541	1	0.582	1	0.463	1	0.758	1	0.659	1	0.0636	1	0.48	1	amino acid derivative metabolism	P
GO:0006576	86	0.641	1	0.931	1	0.985	1	0.569	1	0.828	1	0.993	1	0.252	1	0.645	1	biogenic amine metabolism	P
GO:0006582	10	0.52	1	0.862	1	0.393	1	0.918	1	0.772	1	0.707	1	0.482	1	0.757	1	melanin metabolism	P
GO:0006584	36	0.969	1	0.998	1	0.993	1	0.959	1	1	1	1	1	0.919	1	0.906	1	catecholamine metabolism	P
GO:0006586	11	0.203	1	0.46	1	0.762	1	0.935	1	0.176	1	0.499	1	0.0316	0.753	0.129	1	indolalkylamine metabolism	P
GO:0006595	19	0.208	1	0.118	1	0.472	1	0.0198	0.769	0.315	1	0.574	1	0.766	1	0.621	1	polyamine metabolism	P
GO:0006596	10	0.056	1	0.232	1	0.37	1	0.258	1	0.118	1	0.424	1	0.087	1	0.176	1	polyamine biosynthesis	P
GO:0006605	221	0.000972	0.093	9.85e-08	0.00266	0.00491	0.188	1.4e-05	0.00177	0.00381	0.135	1.89e-05	0.002	0.0806	1	0.00209	0.063	protein targeting	P
GO:0006606	81	0.0251	1	4.23e-05	0.028	0.0659	1	0.000708	0.027	0.0982	1	0.000391	0.02	0.137	1	0.00727	0.258	protein import into nucleus	P
GO:0006611	18	0.00141	0.093	0.00242	0.187	0.00499	0.188	0.0207	0.769	0.0463	1	0.0417	1	0.0374	0.783	0.043	1	protein export from nucleus	P
GO:0006612	29	0.0224	1	0.000652	0.073	0.0382	1	0.00197	0.044	0.00407	0.135	0.00435	0.152	0.246	1	0.207	1	protein targeting to membrane	P
GO:0006613	19	0.137	1	0.00566	0.559	0.194	1	0.0115	0.378	0.0628	1	0.0121	1	0.692	1	0.418	1	cotranslational protein targeting to membrane	P
GO:0006614	16	0.241	1	0.0129	0.751	0.346	1	0.0112	0.378	0.149	1	0.0198	1	0.657	1	0.544	1	SRP-dependent cotranslational protein targeting to membrane	P
GO:0006625	10	0.277	1	0.196	1	0.251	1	0.265	1	0.256	1	0.373	1	0.618	1	0.129	1	protein targeting to peroxisome	P
GO:0006626	10	0.152	1	0.0315	1	0.652	1	0.0224	0.769	0.143	1	0.382	1	0.259	1	0.313	1	protein targeting to mitochondrion	P
GO:0006629	742	0.007	0.364	0.0244	1	0.00823	0.343	0.248	1	0.301	1	0.0732	1	0.00925	0.217	0.00208	0.063	lipid metabolism	P
GO:0006631	186	0.0272	1	0.00254	0.187	0.125	1	0.0337	1	0.0773	1	0.00404	0.152	0.0893	1	0.00177	0.063	fatty acid metabolism	P
GO:0006633	83	0.376	1	0.388	1	0.934	1	0.729	1	0.295	1	0.36	1	0.111	1	0.115	1	fatty acid biosynthesis	P
GO:0006635	16	0.0547	1	0.00148	0.075	0.0474	1	0.00625	0.378	0.064	1	0.0259	1	0.5	1	0.00631	0.258	fatty acid beta-oxidation	P
GO:0006637	15	0.793	1	0.0749	1	0.287	1	0.265	1	0.748	1	0.0339	1	0.67	1	0.0608	1	acyl-CoA metabolism	P
GO:0006638	36	0.237	1	0.761	1	0.769	1	0.862	1	0.908	1	0.979	1	0.0276	0.606	0.405	1	neutral lipid metabolism	P
GO:0006639	35	0.276	1	0.804	1	0.814	1	0.925	1	0.94	1	0.989	1	0.0291	0.606	0.39	1	acylglycerol metabolism	P
GO:0006641	30	0.238	1	0.813	1	0.82	1	0.888	1	0.932	1	0.987	1	0.0156	0.439	0.491	1	triacylglycerol metabolism	P
GO:0006643	201	0.000254	0.019	0.000176	0.028	0.000398	0.0161	0.000598	0.027	0.0924	1	0.0155	1	0.00815	0.217	0.00909	0.448	membrane lipid metabolism	P
GO:0006644	160	0.000506	0.052	0.00537	0.559	0.000215	0.0161	0.00825	0.378	0.117	1	0.0395	1	0.0135	0.439	0.0387	1	phospholipid metabolism	P
GO:0006650	84	0.000109	0.019	8.28e-06	0.003	0.000103	0.0161	0.000778	0.027	0.0205	0.719	0.000318	0.0136	0.00781	0.201	0.00126	0.044	glycerophospholipid metabolism	P
GO:0006662	37	0.17	1	0.682	1	0.744	1	0.924	1	0.653	1	0.977	1	0.0299	0.753	0.223	1	glycerol ether metabolism	P
GO:0006664	17	0.0768	1	0.0909	1	0.105	1	0.0427	1	0.729	1	0.654	1	0.284	1	0.0444	1	glycolipid metabolism	P
GO:0006665	54	0.0317	1	0.00112	0.073	0.0847	1	0.00191	0.044	0.243	1	0.0805	1	0.167	1	0.0528	1	sphingolipid metabolism	P
GO:0006672	30	0.0223	1	0.00045	0.043	0.0622	1	0.00358	0.142	0.258	1	0.0474	1	0.184	1	0.0582	1	ceramide metabolism	P
GO:0006684	10	0.0809	1	0.386	1	0.018	0.81	0.204	1	0.623	1	0.423	1	0.328	1	0.552	1	sphingomyelin metabolism	P
GO:0006687	11	0.00345	0.186	0.143	1	0.0431	1	0.0252	0.769	0.586	1	0.782	1	0.146	1	0.0902	1	glycosphingolipid metabolism	P
GO:0006690	33	0.61	1	0.763	1	0.763	1	0.555	1	0.438	1	0.977	1	0.551	1	0.354	1	icosanoid metabolism	P
GO:0006691	19	0.727	1	0.958	1	0.633	1	0.887	1	0.729	1	0.986	1	0.521	1	0.477	1	leukotriene metabolism	P
GO:0006692	14	0.358	1	0.305	1	0.781	1	0.158	1	0.134	1	0.75	1	0.556	1	0.3	1	prostanoid metabolism	P
GO:0006693	14	0.358	1	0.305	1	0.781	1	0.158	1	0.134	1	0.75	1	0.556	1	0.3	1	prostaglandin metabolism	P
GO:0006694	93	0.755	1	0.738	1	0.671	1	0.931	1	0.618	1	0.368	1	0.642	1	0.807	1	steroid biosynthesis	P
GO:0006695	29	0.539	1	0.212	1	0.477	1	0.233	1	0.795	1	0.131	1	0.397	1	0.802	1	cholesterol biosynthesis	P
GO:0006700	15	0.965	1	1	1	0.807	1	0.957	1	0.891	1	0.997	1	1	1	0.988	1	C21-steroid hormone biosynthesis	P
GO:0006706	10	0.128	1	0.218	1	0.38	1	0.665	1	0.127	1	0.53	1	0.0999	1	0.136	1	steroid catabolism	P
GO:0006720	36	0.125	1	0.314	1	0.664	1	0.4	1	0.357	1	0.277	1	0.0893	1	0.754	1	isoprenoid metabolism	P
GO:0006725	174	0.197	1	0.611	1	0.405	1	0.815	1	0.651	1	0.446	1	0.137	1	0.43	1	aromatic compound metabolism	P
GO:0006730	118	0.0174	0.983	0.0123	0.751	0.0234	1	0.144	1	0.0118	0.421	0.00902	0.355	0.373	1	0.0185	0.94	one-carbon compound metabolism	P
GO:0006732	174	0.0187	0.983	0.00561	0.559	0.199	1	0.0257	0.769	0.0569	1	0.0349	1	0.0462	0.834	0.0144	0.94	coenzyme metabolism	P
GO:0006733	35	0.00368	0.186	0.146	1	0.0141	0.81	0.136	1	0.0187	0.719	0.413	1	0.0198	0.471	0.21	1	oxidoreduction coenzyme metabolism	P
GO:0006739	14	0.024	1	0.346	1	0.0909	1	0.272	1	0.117	1	0.389	1	0.0853	1	0.68	1	NADP metabolism	P
GO:0006749	26	0.498	1	0.334	1	0.933	1	0.461	1	0.209	1	0.142	1	0.52	1	0.85	1	glutathione metabolism	P
GO:0006752	62	0.258	1	0.113	1	0.827	1	0.393	1	0.14	1	0.275	1	0.299	1	0.111	1	group transfer coenzyme metabolism	P
GO:0006753	34	0.622	1	0.715	1	0.997	1	0.851	1	0.25	1	0.853	1	0.72	1	0.602	1	nucleoside phosphate metabolism	P
GO:0006754	34	0.622	1	0.715	1	0.997	1	0.851	1	0.25	1	0.853	1	0.72	1	0.602	1	ATP biosynthesis	P
GO:0006760	16	0.127	1	0.00226	0.162	0.323	1	0.0598	1	0.0985	1	0.00566	0.202	0.0719	1	0.00641	0.258	folic acid and derivative metabolism	P
GO:0006766	78	0.256	1	0.152	1	0.345	1	0.09	1	0.536	1	0.407	1	0.103	1	0.473	1	vitamin metabolism	P
GO:0006767	49	0.0366	1	0.142	1	0.0815	1	0.129	1	0.141	1	0.25	1	0.0427	0.834	0.549	1	water-soluble vitamin metabolism	P
GO:0006769	23	0.0382	1	0.34	1	0.1	1	0.3	1	0.142	1	0.582	1	0.0704	1	0.347	1	nicotinamide metabolism	P
GO:0006775	28	0.98	1	0.402	1	0.99	1	0.234	1	0.979	1	0.801	1	0.637	1	0.412	1	fat-soluble vitamin metabolism	P
GO:0006776	22	0.99	1	0.728	1	1	1	0.577	1	0.928	1	0.755	1	0.83	1	0.675	1	vitamin A metabolism	P
GO:0006778	26	0.0404	1	0.0772	1	0.114	1	0.0805	1	0.0364	1	0.506	1	0.0952	1	0.11	1	porphyrin metabolism	P
GO:0006779	20	0.0732	1	0.229	1	0.328	1	0.113	1	0.0191	0.719	0.793	1	0.117	1	0.176	1	porphyrin biosynthesis	P
GO:0006783	13	0.0705	1	0.355	1	0.355	1	0.224	1	0.0189	0.719	0.695	1	0.115	1	0.323	1	heme biosynthesis	P
GO:0006790	85	0.416	1	0.176	1	0.964	1	0.568	1	0.171	1	0.108	1	0.519	1	0.203	1	sulfur metabolism	P
GO:0006793	977	0.0136	0.983	3.21e-05	0.028	0.323	1	0.0194	0.769	0.0517	1	0.00188	0.143	0.0068	0.201	4.1e-05	0.00391	phosphorus metabolism	P
GO:0006796	977	0.0136	0.983	3.21e-05	0.028	0.323	1	0.0194	0.769	0.0517	1	0.00188	0.143	0.0068	0.201	4.1e-05	0.00391	phosphate metabolism	P
GO:0006800	131	0.00244	0.102	9.06e-05	0.028	0.0169	0.81	0.00239	0.0652	0.246	1	0.00795	0.355	0.00178	0.0554	0.00125	0.044	oxygen and reactive oxygen species metabolism	P
GO:0006801	19	0.42	1	0.212	1	0.867	1	0.491	1	0.651	1	0.233	1	0.0821	1	0.0212	1	superoxide metabolism	P
GO:0006805	13	0.21	1	0.551	1	0.417	1	0.986	1	0.23	1	0.311	1	0.145	1	0.22	1	xenobiotic metabolism	P
GO:0006807	559	0.0736	1	0.112	1	0.283	1	0.189	1	0.463	1	0.218	1	0.0326	0.753	0.077	1	nitrogen compound metabolism	P
GO:0006809	23	0.523	1	0.905	1	0.554	1	0.787	1	0.918	1	0.948	1	0.124	1	0.596	1	nitric oxide biosynthesis	P
GO:0006810	2901	7.72e-09	0.000973	6.15e-08	0.00266	0.0209	1	2.65e-06	0.001	0.000861	0.044	0.00913	0.355	1.58e-09	0	1.14e-06	0.00391	transport	P
GO:0006811	922	0.8	1	1	1	1	1	0.999	1	0.921	1	1	1	0.00108	0.024	0.767	1	ion transport	P
GO:0006812	655	0.478	1	0.991	1	0.996	1	0.915	1	0.74	1	1	1	0.00509	0.094	0.47	1	cation transport	P
GO:0006813	277	0.508	1	1	1	0.963	1	0.984	1	0.887	1	1	1	0.0544	1	0.992	1	potassium ion transport	P
GO:0006814	137	0.825	1	0.999	1	0.962	1	0.994	1	0.876	1	1	1	0.17	1	0.745	1	sodium ion transport	P
GO:0006816	163	0.429	1	0.882	1	0.986	1	0.857	1	0.786	1	0.999	1	0.000696	0.024	0.0677	1	calcium ion transport	P
GO:0006817	89	1	1	1	1	1	1	1	1	1	1	1	1	0.779	1	0.882	1	phosphate transport	P
GO:0006818	74	0.23	1	0.168	1	0.987	1	0.401	1	0.205	1	0.153	1	0.0767	1	0.311	1	hydrogen transport	P
GO:0006820	216	0.978	1	1	1	0.999	1	1	1	0.891	1	1	1	0.335	1	0.953	1	anion transport	P
GO:0006821	74	0.82	1	0.999	1	0.998	1	0.915	1	0.447	1	0.994	1	0.398	1	0.999	1	chloride transport	P
GO:0006825	11	0.0414	1	0.59	1	0.238	1	0.422	1	0.0655	1	0.929	1	0.292	1	0.334	1	copper ion transport	P
GO:0006826	27	0.317	1	0.291	1	0.415	1	0.204	1	0.428	1	0.312	1	0.245	1	0.75	1	iron ion transport	P
GO:0006829	22	0.537	1	0.105	1	0.27	1	0.124	1	0.408	1	0.51	1	0.883	1	0.189	1	zinc ion transport	P
GO:0006833	11	0.714	1	0.663	1	0.732	1	0.364	1	0.818	1	0.815	1	0.439	1	0.654	1	water transport	P
GO:0006835	57	0.564	1	0.994	1	0.544	1	0.983	1	0.776	1	0.998	1	0.486	1	0.899	1	dicarboxylic acid transport	P
GO:0006836	62	0.965	1	0.992	1	0.981	1	0.996	1	0.6	1	0.98	1	0.952	1	0.806	1	neurotransmitter transport	P
GO:0006839	46	0.0487	1	0.000808	0.073	0.19	1	0.001	0.036	0.0436	1	0.03	1	0.174	1	0.04	1	mitochondrial transport	P
GO:0006857	10	0.115	1	0.435	1	0.816	1	0.821	1	0.284	1	0.196	1	0.0171	0.471	0.365	1	oligopeptide transport	P
GO:0006865	71	0.656	1	0.266	1	0.827	1	0.559	1	0.878	1	0.346	1	0.444	1	0.0443	1	amino acid transport	P
GO:0006869	103	0.053	1	0.161	1	0.047	1	0.356	1	0.0846	1	0.297	1	0.199	1	0.127	1	lipid transport	P
GO:0006873	151	0.117	1	0.932	1	0.273	1	0.574	1	0.208	1	0.997	1	0.129	1	0.858	1	cell ion homeostasis	P
GO:0006874	86	0.182	1	0.922	1	0.603	1	0.797	1	0.388	1	0.999	1	0.0348	0.753	0.486	1	calcium ion homeostasis	P
GO:0006875	133	0.0984	1	0.923	1	0.206	1	0.57	1	0.149	1	0.996	1	0.116	1	0.905	1	metal ion homeostasis	P
GO:0006879	25	0.0629	1	0.51	1	0.0321	1	0.317	1	0.0658	1	0.399	1	0.499	1	0.998	1	iron ion homeostasis	P
GO:0006885	34	0.915	1	0.979	1	0.976	1	0.939	1	0.854	1	0.99	1	0.891	1	0.765	1	regulation of pH	P
GO:0006886	509	7.8e-10	0.000973	1.05e-16	0	4.49e-06	0.00169	2.4e-12	0	2.42e-07	0	1.22e-10	0.000771	0.00054	0.0189	1.36e-05	0.00391	intracellular protein transport	P
GO:0006887	100	0.175	1	0.812	1	0.296	1	0.617	1	0.403	1	0.998	1	0.0917	1	0.197	1	exocytosis	P
GO:0006888	28	0.145	1	0.00825	0.559	0.122	1	0.0324	1	0.362	1	0.00797	0.355	0.376	1	0.355	1	ER to Golgi vesicle-mediated transport	P
GO:0006891	11	0.0313	1	0.0112	0.751	0.127	1	0.00603	0.378	0.0757	1	0.0675	1	0.158	1	0.193	1	intra-Golgi vesicle-mediated transport	P
GO:0006892	15	0.00551	0.348	0.181	1	0.135	1	0.142	1	0.0802	1	0.304	1	0.051	1	0.505	1	post-Golgi vesicle-mediated transport	P
GO:0006897	197	0.00381	0.186	0.0603	1	0.101	1	0.169	1	0.296	1	0.449	1	0.000345	0.0189	0.0219	1	endocytosis	P
GO:0006898	25	0.447	1	0.062	1	0.495	1	0.0259	0.769	0.825	1	0.165	1	0.257	1	0.223	1	receptor mediated endocytosis	P
GO:0006904	18	0.412	1	0.207	1	0.502	1	0.315	1	0.502	1	0.479	1	0.234	1	0.0522	1	vesicle docking during exocytosis	P
GO:0006909	50	0.589	1	0.994	1	0.72	1	0.98	1	0.73	1	0.999	1	0.307	1	0.969	1	phagocytosis	P
GO:0006910	12	0.728	1	0.489	1	0.739	1	0.502	1	0.887	1	0.408	1	0.469	1	0.791	1	phagocytosis, recognition	P
GO:0006911	14	0.99	1	0.948	1	0.939	1	0.908	1	0.808	1	0.857	1	1	1	0.987	1	phagocytosis, engulfment	P
GO:0006913	230	2.11e-05	0.005	5.38e-09	0.00266	0.000231	0.0161	2.11e-07	0.000957	0.000629	0.044	1.93e-06	0.002	0.033	0.753	0.00044	0.021	nucleocytoplasmic transport	P
GO:0006914	30	0.0419	1	0.00778	0.559	0.0839	1	0.0941	1	0.167	1	0.149	1	0.0485	1	0.0237	1	autophagy	P
GO:0006915	758	0.00365	0.186	0.0332	1	0.0352	1	0.0362	1	0.00982	0.369	0.192	1	0.0603	1	0.101	1	apoptosis	P
GO:0006916	105	0.305	1	0.579	1	0.538	1	0.376	1	0.506	1	0.801	1	0.441	1	0.515	1	anti-apoptosis	P
GO:0006917	185	0.00829	0.618	0.0243	1	0.0949	1	0.0284	1	0.0813	1	0.122	1	0.00265	0.0554	0.0916	1	induction of apoptosis	P
GO:0006919	35	0.00284	0.139	0.0588	1	0.0066	0.283	0.0764	1	0.0309	1	0.0724	1	0.0163	0.471	0.132	1	caspase activation	P
GO:0006921	12	0.0456	1	0.0667	1	0.123	1	0.0379	1	0.104	1	0.232	1	0.172	1	0.311	1	disassembly of cell structures during apoptosis	P
GO:0006928	433	0.999	1	1	1	1	1	0.998	1	0.999	1	1	1	0.634	1	0.91	1	cell motility	P
GO:0006935	157	0.994	1	0.903	1	0.981	1	0.998	1	0.993	1	0.965	1	0.723	1	0.078	1	chemotaxis	P
GO:0006936	73	0.233	1	0.931	1	0.6	1	0.699	1	0.207	1	0.999	1	0.107	1	0.694	1	muscle contraction	P
GO:0006937	28	0.202	1	0.988	1	0.217	1	0.988	1	0.531	1	0.998	1	0.193	1	0.619	1	regulation of muscle contraction	P
GO:0006939	22	0.332	1	0.968	1	0.581	1	0.589	1	0.241	1	1	1	0.475	1	0.804	1	smooth muscle contraction	P
GO:0006940	16	0.434	1	1	1	0.446	1	1	1	0.484	1	1	1	0.54	1	0.661	1	regulation of smooth muscle contraction	P
GO:0006941	28	0.691	1	0.918	1	0.969	1	0.707	1	0.51	1	1	1	0.134	1	0.728	1	striated muscle contraction	P
GO:0006944	23	0.16	1	0.771	1	0.0908	1	0.627	1	0.694	1	0.87	1	0.162	1	0.6	1	membrane fusion	P
GO:0006950	1202	0.101	1	0.0578	1	0.133	1	0.0186	0.769	0.284	1	0.271	1	0.236	1	0.344	1	response to stress	P
GO:0006952	551	1	1	1	1	0.999	1	0.999	1	0.999	1	1	1	0.557	1	1	1	defense response	P
GO:0006953	29	0.989	1	0.983	1	0.867	1	0.992	1	0.969	1	0.998	1	0.965	1	0.438	1	acute-phase response	P
GO:0006954	291	1	1	1	1	1	1	1	1	0.997	1	1	1	0.921	1	0.982	1	inflammatory response	P
GO:0006955	553	0.967	1	1	1	0.945	1	1	1	1	1	0.997	1	0.0919	1	0.878	1	immune response	P
GO:0006956	37	0.988	1	0.998	1	0.833	1	0.999	1	1	1	0.965	1	0.578	1	0.961	1	complement activation	P
GO:0006957	10	0.777	1	1	1	0.647	1	1	1	1	1	1	1	0.197	1	0.954	1	complement activation, alternative pathway	P
GO:0006958	29	0.985	1	0.968	1	0.898	1	0.983	1	1	1	0.805	1	0.625	1	0.915	1	complement activation, classical pathway	P
GO:0006959	55	0.969	1	1	1	0.886	1	0.999	1	1	1	0.992	1	0.42	1	0.984	1	humoral immune response	P
GO:0006968	12	0.581	1	0.954	1	0.282	1	0.874	1	0.588	1	0.953	1	0.936	1	0.563	1	cellular defense response	P
GO:0006970	16	0.17	1	0.0684	1	0.408	1	0.117	1	0.19	1	0.146	1	0.331	1	0.163	1	response to osmotic stress	P
GO:0006974	303	5.21e-10	0.000973	1.25e-15	0	3.07e-08	0	4.41e-11	0	2.56e-07	0	2.48e-11	0	0.00893	0.217	3.79e-05	0.00391	response to DNA damage stimulus	P
GO:0006979	100	0.00656	0.364	0.00057	0.073	0.032	1	0.00713	0.378	0.152	1	0.00837	0.355	0.0291	0.606	0.0335	1	response to oxidative stress	P
GO:0006984	23	0.0474	1	0.254	1	0.0895	1	0.209	1	0.129	1	0.231	1	0.248	1	0.692	1	ER-nuclear signaling pathway	P
GO:0006986	48	0.00144	0.093	0.287	1	0.00473	0.188	0.121	1	0.0149	0.481	0.429	1	0.0458	0.834	0.866	1	response to unfolded protein	P
GO:0006996	1070	2.6e-22	0	3.34e-25	0	4.97e-16	0	4.67e-20	0	8.16e-16	0	4.54e-11	0	4.68e-05	0.002	7.43e-09	0	organelle organization and biogenesis	P
GO:0006997	15	0.0833	1	0.0209	1	0.0232	1	0.0297	1	0.0628	1	0.0338	1	0.785	1	0.382	1	nuclear organization and biogenesis	P
GO:0007001	303	2.96e-09	0.000973	7.45e-14	0	8.27e-09	0	2.01e-12	0	3.08e-06	0.000765	4.87e-06	0.002	0.107	1	7.04e-06	0.00391	chromosome organization and biogenesis (sensu Eukaryota)	P
GO:0007005	53	0.014	0.983	0.00162	0.075	0.182	1	0.00343	0.142	0.00363	0.135	0.0313	1	0.43	1	0.0955	1	mitochondrion organization and biogenesis	P
GO:0007006	25	0.0443	1	0.00239	0.187	0.265	1	0.00439	0.142	0.0358	1	0.12	1	0.681	1	0.205	1	mitochondrial membrane organization and biogenesis	P
GO:0007009	11	0.292	1	0.894	1	0.285	1	0.969	1	0.419	1	0.747	1	0.28	1	0.833	1	plasma membrane organization and biogenesis	P
GO:0007010	488	2.26e-07	0.000973	0.000109	0.028	2.02e-05	0.003	0.00134	0.044	0.000116	0.006	0.00785	0.355	0.00097	0.024	0.00827	0.448	cytoskeleton organization and biogenesis	P
GO:0007015	55	0.128	1	0.268	1	0.178	1	0.347	1	0.241	1	0.558	1	0.41	1	0.319	1	actin filament organization	P
GO:0007017	214	2.53e-07	0.000973	1.35e-05	0.007	2.72e-06	0.00169	0.000132	0.0058	8.24e-05	0.003	0.000693	0.02	0.00299	0.0554	0.0299	1	microtubule-based process	P
GO:0007018	116	0.000132	0.019	0.00289	0.187	0.000466	0.0161	0.0134	0.378	0.00145	0.048	0.0178	1	0.0411	0.834	0.0503	1	microtubule-based movement	P
GO:0007019	17	0.0262	1	0.279	1	0.22	1	0.228	1	0.0367	1	0.325	1	0.0286	0.606	0.588	1	microtubule depolymerization	P
GO:0007026	16	0.0606	1	0.173	1	0.159	1	0.173	1	0.075	1	0.216	1	0.0631	1	0.461	1	negative regulation of microtubule depolymerization	P
GO:0007028	118	0.000264	0.019	3.76e-06	0.00286	0.0264	1	1.84e-06	0.001	0.00141	0.048	0.00527	0.202	0.123	1	0.201	1	cytoplasm organization and biogenesis	P
GO:0007030	12	0.0758	1	0.141	1	0.136	1	0.0875	1	0.0332	1	0.177	1	0.403	1	0.467	1	Golgi organization and biogenesis	P
GO:0007031	20	0.03	1	0.0182	1	0.0534	1	0.147	1	0.0625	1	0.0608	1	0.138	1	0.0202	1	peroxisome organization and biogenesis	P
GO:0007033	31	0.414	1	0.146	1	0.214	1	0.259	1	0.692	1	0.249	1	0.761	1	0.122	1	vacuole organization and biogenesis	P
GO:0007034	22	0.145	1	0.0453	1	0.115	1	0.121	1	0.226	1	0.15	1	0.293	1	0.0367	1	vacuolar transport	P
GO:0007040	27	0.481	1	0.123	1	0.243	1	0.213	1	0.77	1	0.224	1	0.818	1	0.116	1	lysosome organization and biogenesis	P
GO:0007041	12	0.375	1	0.198	1	0.18	1	0.432	1	0.539	1	0.187	1	0.587	1	0.174	1	lysosomal transport	P
GO:0007046	66	0.0022	0.102	0.000455	0.043	0.0502	1	7.23e-05	0.0058	0.00628	0.165	0.0264	1	0.124	1	0.654	1	ribosome biogenesis	P
GO:0007049	671	2.54e-13	0.000662	2.91e-23	0	1.35e-14	0	2.58e-19	0	1.53e-08	0	6.31e-14	0	0.00949	0.217	3.73e-08	0	cell cycle	P
GO:0007050	61	0.149	1	0.657	1	0.222	1	0.187	1	0.0978	1	0.68	1	0.469	1	0.819	1	cell cycle arrest	P
GO:0007051	18	0.0147	0.983	0.0407	1	0.0172	0.81	0.0557	1	0.124	1	0.108	1	0.0356	0.753	0.388	1	spindle organization and biogenesis	P
GO:0007059	55	0.00595	0.364	1.43e-05	0.007	0.015	0.81	2.35e-05	0.00192	0.00747	0.318	0.000128	0.0136	0.533	1	0.0557	1	chromosome segregation	P
GO:0007067	186	1.21e-10	0.000662	6.94e-20	0	1.08e-10	0	2.12e-14	0	4.14e-08	0	1.61e-12	0	0.00763	0.201	5.14e-09	0	mitosis	P
GO:0007076	14	0.0776	1	0.106	1	0.0731	1	0.0573	1	0.0411	1	0.163	1	0.719	1	0.516	1	mitotic chromosome condensation	P
GO:0007088	44	0.0648	1	0.00599	0.559	0.0327	1	0.00489	0.142	0.0282	1	0.0375	1	0.371	1	0.0249	1	regulation of mitosis	P
GO:0007090	11	0.131	1	0.362	1	0.3	1	0.267	1	0.122	1	0.309	1	0.422	1	0.72	1	regulation of S phase of mitotic cell cycle	P
GO:0007093	13	0.0027	0.139	4.27e-06	0.00286	0.00719	0.283	1.18e-05	0.00177	0.0124	0.481	0.00142	0.051	0.274	1	0.00509	0.258	mitotic checkpoint	P
GO:0007098	12	0.0234	1	0.0055	0.559	0.00393	0.188	0.0158	0.769	0.181	1	0.0369	1	0.293	1	0.117	1	centrosome cycle	P
GO:0007126	83	0.000323	0.0325	4.46e-07	0.00266	5.17e-05	0.003	0.000215	0.011	0.0318	1	0.000128	0.0136	0.126	1	0.000871	0.033	meiosis	P
GO:0007127	29	0.00201	0.102	0.000153	0.028	0.000263	0.0161	0.000949	0.036	0.076	1	4.48e-05	0.002	0.183	1	0.0338	1	meiosis I	P
GO:0007129	11	0.0108	0.983	0.000566	0.073	0.00902	0.469	0.00377	0.142	0.0703	1	0.00136	0.051	0.137	1	0.028	1	synapsis	P
GO:0007143	11	0.673	1	0.122	1	0.467	1	0.196	1	0.609	1	0.16	1	0.868	1	0.137	1	female meiosis	P
GO:0007154	3405	1	1	1	1	1	1	1	1	1	1	1	1	0.901	1	0.512	1	cell communication	P
GO:0007155	681	0.956	1	1	1	0.994	1	1	1	0.971	1	1	1	0.0875	1	0.944	1	cell adhesion	P
GO:0007156	83	1	1	1	1	1	1	1	1	1	1	1	1	0.801	1	0.997	1	homophilic cell adhesion	P
GO:0007157	35	0.86	1	0.643	1	0.903	1	0.472	1	0.843	1	0.992	1	0.601	1	0.404	1	heterophilic cell adhesion	P
GO:0007159	18	0.43	1	0.223	1	0.396	1	0.381	1	0.336	1	0.553	1	0.698	1	0.0969	1	leukocyte adhesion	P
GO:0007160	87	0.268	1	0.213	1	0.118	1	0.456	1	0.539	1	0.483	1	0.495	1	0.0965	1	cell-matrix adhesion	P
GO:0007162	16	0.396	1	0.86	1	0.569	1	0.949	1	0.679	1	0.767	1	0.168	1	0.761	1	negative regulation of cell adhesion	P
GO:0007163	25	0.4	1	0.404	1	0.379	1	0.457	1	0.515	1	0.788	1	0.608	1	0.164	1	establishment and/or maintenance of cell polarity	P
GO:0007165	3094	1	1	1	1	1	1	1	1	1	1	1	1	0.937	1	0.479	1	signal transduction	P
GO:0007166	1751	1	1	1	1	1	1	1	1	1	1	1	1	0.997	1	0.991	1	cell surface receptor linked signal transduction	P
GO:0007167	295	0.981	1	0.999	1	1	1	1	1	0.931	1	0.946	1	0.525	1	0.664	1	enzyme linked receptor protein signaling pathway	P
GO:0007169	187	0.848	1	0.997	1	0.984	1	1	1	0.795	1	0.872	1	0.239	1	0.778	1	transmembrane receptor protein tyrosine kinase signaling pathway	P
GO:0007172	13	0.297	1	0.835	1	0.618	1	0.983	1	0.259	1	0.588	1	0.166	1	0.481	1	signal complex formation	P
GO:0007173	20	0.255	1	0.456	1	0.418	1	0.992	1	0.19	1	0.0848	1	0.251	1	0.454	1	epidermal growth factor receptor signaling pathway	P
GO:0007178	104	0.989	1	0.977	1	0.996	1	0.994	1	0.937	1	0.943	1	0.963	1	0.731	1	transmembrane receptor protein serine/threonine kinase signaling pathway	P
GO:0007179	63	0.862	1	0.903	1	0.894	1	0.871	1	0.85	1	0.965	1	0.804	1	0.531	1	transforming growth factor beta receptor signaling pathway	P
GO:0007186	1117	1	1	1	1	1	1	1	1	1	1	1	1	1	1	0.996	1	G-protein coupled receptor protein signaling pathway	P
GO:0007187	61	1	1	0.999	1	1	1	1	1	1	1	0.994	1	0.965	1	0.873	1	G-protein signaling, coupled to cyclic nucleotide second messenger	P
GO:0007188	57	1	1	1	1	1	1	1	1	1	1	1	1	0.954	1	0.867	1	G-protein signaling, coupled to cAMP nucleotide second messenger	P
GO:0007189	34	1	1	1	1	1	1	1	1	1	1	1	1	1	1	0.978	1	G-protein signaling, adenylate cyclase activating pathway	P
GO:0007190	14	0.977	1	1	1	1	1	1	1	0.995	1	1	1	0.993	1	0.993	1	adenylate cyclase activation	P
GO:0007193	15	0.814	1	0.769	1	1	1	0.951	1	0.83	1	0.762	1	0.177	1	0.29	1	G-protein signaling, adenylate cyclase inhibiting pathway	P
GO:0007200	44	0.861	1	0.684	1	0.905	1	0.543	1	0.411	1	0.738	1	0.925	1	0.637	1	G-protein signaling, coupled to IP3 second messenger (phospholipase C activating)	P
GO:0007204	37	0.276	1	0.899	1	0.391	1	0.878	1	0.585	1	0.993	1	0.0795	1	0.391	1	elevation of cytosolic calcium ion concentration	P
GO:0007205	21	0.78	1	0.829	1	0.451	1	0.746	1	0.844	1	0.71	1	0.881	1	0.947	1	protein kinase C activation	P
GO:0007212	14	1	1	0.999	1	1	1	1	1	0.81	1	0.938	1	1	1	0.979	1	dopamine receptor signaling pathway	P
GO:0007214	31	0.998	1	1	1	1	1	1	1	0.974	1	1	1	0.825	1	1	1	gamma-aminobutyric acid signaling pathway	P
GO:0007215	13	0.17	1	0.225	1	0.427	1	0.203	1	0.377	1	0.263	1	0.0761	1	0.206	1	glutamate signaling pathway	P
GO:0007218	96	0.993	1	0.995	1	1	1	0.977	1	0.758	1	1	1	0.672	1	0.587	1	neuropeptide signaling pathway	P
GO:0007219	55	0.71	1	0.385	1	0.772	1	0.205	1	0.819	1	0.985	1	0.477	1	0.532	1	Notch signaling pathway	P
GO:0007223	20	0.996	1	0.986	1	0.999	1	0.921	1	0.992	1	0.982	1	0.716	1	0.88	1	frizzled-2 signaling pathway	P
GO:0007224	30	0.461	1	0.622	1	0.969	1	0.899	1	0.7	1	0.77	1	0.0268	0.606	0.151	1	smoothened signaling pathway	P
GO:0007229	90	0.708	1	0.964	1	0.377	1	0.836	1	0.952	1	0.956	1	0.311	1	0.917	1	integrin-mediated signaling pathway	P
GO:0007242	1211	0.0117	0.983	0.000936	0.073	0.0429	1	0.012	0.378	0.088	1	0.0226	1	0.0911	1	0.00288	0.216	intracellular signaling cascade	P
GO:0007243	352	0.545	1	0.0199	1	0.868	1	0.0686	1	0.924	1	0.136	1	0.214	1	0.00655	0.258	protein kinase cascade	P
GO:0007249	104	0.197	1	0.0126	0.751	0.224	1	0.00732	0.378	0.807	1	0.161	1	0.0996	1	0.0908	1	I-kappaB kinase/NF-kappaB cascade	P
GO:0007254	50	0.885	1	0.963	1	0.972	1	0.974	1	0.907	1	0.78	1	0.483	1	0.926	1	JNK cascade	P
GO:0007257	12	0.467	1	0.411	1	0.926	1	0.506	1	0.143	1	0.423	1	0.27	1	0.375	1	activation of JNK activity	P
GO:0007259	42	0.438	1	0.276	1	0.51	1	0.463	1	0.857	1	0.402	1	0.222	1	0.288	1	JAK-STAT cascade	P
GO:0007260	19	0.948	1	0.962	1	0.955	1	0.559	1	1	1	1	1	0.504	1	0.605	1	tyrosine phosphorylation of STAT protein	P
GO:0007264	419	0.00232	0.102	0.00261	0.187	0.0103	0.474	0.0249	0.769	0.00246	0.135	0.0083	0.355	0.192	1	0.0712	1	small GTPase mediated signal transduction	P
GO:0007265	34	0.0714	1	0.342	1	0.131	1	0.102	1	0.113	1	0.503	1	0.328	1	0.793	1	Ras protein signal transduction	P
GO:0007266	96	0.0909	1	0.159	1	0.365	1	0.732	1	0.365	1	0.17	1	0.03	0.753	0.0379	1	Rho protein signal transduction	P
GO:0007267	391	0.998	1	1	1	1	1	1	1	0.969	1	1	1	0.908	1	0.902	1	cell-cell signaling	P
GO:0007268	239	0.979	1	1	1	0.99	1	1	1	0.997	1	1	1	0.445	1	0.859	1	synaptic transmission	P
GO:0007269	70	0.9	1	1	1	0.785	1	0.999	1	0.971	1	1	1	0.699	1	0.948	1	neurotransmitter secretion	P
GO:0007270	51	0.757	1	0.961	1	0.939	1	0.98	1	0.482	1	0.954	1	0.644	1	0.794	1	nerve-nerve synaptic transmission	P
GO:0007271	12	1	1	1	1	1	1	1	1	1	1	1	1	0.51	1	0.815	1	synaptic transmission, cholinergic	P
GO:0007272	38	0.352	1	0.542	1	0.442	1	0.672	1	0.381	1	0.702	1	0.409	1	0.17	1	ensheathment of neurons	P
GO:0007274	13	0.695	1	0.665	1	0.886	1	0.856	1	0.898	1	0.443	1	0.206	1	0.925	1	neuromuscular synaptic transmission	P
GO:0007275	2606	1	1	1	1	1	1	0.976	1	1	1	1	1	0.969	1	0.969	1	development	P
GO:0007276	384	1	1	0.999	1	0.989	1	0.787	1	0.977	1	0.999	1	1	1	1	1	gametogenesis	P
GO:0007281	40	0.284	1	0.0725	1	0.384	1	0.141	1	0.465	1	0.176	1	0.325	1	0.11	1	germ cell development	P
GO:0007283	213	0.00674	0.364	0.00262	0.187	0.0104	0.474	0.00186	0.044	0.0444	1	0.0234	1	0.289	1	0.258	1	spermatogenesis	P
GO:0007286	42	0.255	1	0.00996	0.751	0.069	1	0.0456	1	0.856	1	0.0201	1	0.747	1	0.225	1	spermatid development	P
GO:0007292	42	0.186	1	0.123	1	0.15	1	0.171	1	0.47	1	0.552	1	0.173	1	0.0433	1	female gamete generation	P
GO:0007338	45	0.672	1	0.4	1	0.4	1	0.241	1	0.998	1	0.698	1	0.39	1	0.638	1	fertilization (sensu Metazoa)	P
GO:0007339	19	0.762	1	0.619	1	0.478	1	0.567	1	0.999	1	0.64	1	0.514	1	0.574	1	binding of sperm to zona pellucida	P
GO:0007340	11	0.612	1	0.33	1	0.645	1	0.369	1	0.823	1	0.226	1	0.377	1	0.441	1	acrosome reaction	P
GO:0007346	35	0.154	1	0.111	1	0.363	1	0.0733	1	0.0168	0.719	0.243	1	0.759	1	0.659	1	regulation of progression through mitotic cell cycle	P
GO:0007368	35	0.95	1	0.727	1	0.965	1	0.735	1	0.847	1	0.73	1	0.986	1	0.599	1	determination of left/right symmetry	P
GO:0007369	66	0.93	1	0.102	1	0.978	1	0.15	1	0.71	1	0.289	1	0.712	1	0.118	1	gastrulation	P
GO:0007389	241	1	1	1	1	1	1	1	1	1	1	1	1	1	1	0.999	1	pattern specification	P
GO:0007398	131	0.997	1	0.964	1	0.956	1	0.561	1	0.92	1	1	1	0.986	1	0.911	1	ectoderm development	P
GO:0007399	720	1	1	1	1	1	1	1	1	1	1	1	1	0.999	1	1	1	nervous system development	P
GO:0007405	26	0.309	1	0.529	1	0.37	1	0.782	1	0.194	1	0.668	1	0.642	1	0.437	1	neuroblast proliferation	P
GO:0007409	172	1	1	1	1	1	1	1	1	1	1	1	1	0.822	1	0.999	1	axonogenesis	P
GO:0007411	91	1	1	1	1	1	1	1	1	1	1	1	1	0.997	1	1	1	axon guidance	P
GO:0007416	19	0.985	1	1	1	1	1	0.999	1	1	1	1	1	0.643	1	0.92	1	synaptogenesis	P
GO:0007417	313	1	1	1	1	1	1	0.984	1	1	1	1	1	1	1	1	1	central nervous system development	P
GO:0007420	241	1	1	0.998	1	1	1	0.893	1	1	1	0.997	1	1	1	1	1	brain development	P
GO:0007422	26	0.999	1	0.994	1	1	1	0.95	1	0.982	1	0.988	1	1	1	0.943	1	peripheral nervous system development	P
GO:0007423	162	1	1	1	1	0.999	1	1	1	1	1	1	1	0.985	1	0.995	1	sensory organ development	P
GO:0007431	12	0.942	1	0.971	1	0.996	1	0.995	1	0.724	1	0.934	1	0.729	1	0.784	1	salivary gland development	P
GO:0007439	10	0.771	1	0.701	1	0.993	1	0.924	1	0.406	1	0.936	1	0.394	1	0.132	1	ectodermal gut development	P
GO:0007492	21	0.894	1	0.67	1	0.99	1	0.402	1	0.918	1	0.984	1	0.385	1	0.844	1	endoderm development	P
GO:0007498	55	0.732	1	0.178	1	0.793	1	0.313	1	0.628	1	0.345	1	0.725	1	0.0642	1	mesoderm development	P
GO:0007507	162	0.706	1	0.292	1	0.958	1	0.191	1	0.456	1	0.884	1	0.512	1	0.181	1	heart development	P
GO:0007512	13	0.792	1	0.995	1	0.832	1	0.888	1	0.822	1	1	1	0.428	1	0.732	1	adult heart development	P
GO:0007517	204	0.921	1	1	1	0.627	1	0.991	1	0.998	1	1	1	0.674	1	0.99	1	muscle development	P
GO:0007519	148	0.762	1	0.996	1	0.626	1	0.906	1	0.978	1	1	1	0.517	1	0.908	1	striated muscle development	P
GO:0007528	23	0.872	1	0.729	1	0.837	1	0.936	1	0.904	1	0.578	1	0.426	1	0.518	1	neuromuscular junction development	P
GO:0007530	20	0.762	1	1	1	0.713	1	0.995	1	0.992	1	1	1	0.387	1	0.871	1	sex determination	P
GO:0007548	96	0.974	1	0.62	1	0.864	1	0.701	1	0.958	1	0.677	1	0.985	1	0.65	1	sex differentiation	P
GO:0007565	45	1	1	1	1	0.981	1	0.994	1	1	1	1	1	0.978	1	0.659	1	pregnancy	P
GO:0007566	15	0.916	1	0.641	1	0.832	1	0.663	1	0.99	1	0.984	1	0.653	1	0.22	1	embryo implantation	P
GO:0007568	53	0.407	1	0.556	1	0.455	1	0.85	1	0.513	1	0.258	1	0.531	1	0.855	1	aging	P
GO:0007569	28	0.526	1	0.656	1	0.664	1	0.515	1	0.417	1	0.608	1	0.901	1	0.931	1	cell aging	P
GO:0007582	11603	4.23e-32	0	0	0	1.14e-16	0	7.51e-37	0	8.57e-18	0	3.78e-29	0	1.62e-09	0	1.79e-18	0	physiological process	P
GO:0007584	42	0.00606	0.364	0.202	1	0.00379	0.188	0.123	1	0.14	1	0.244	1	0.0887	1	0.439	1	response to nutrient	P
GO:0007585	28	0.575	1	1	1	0.993	1	1	1	0.468	1	1	1	0.212	1	1	1	respiratory gaseous exchange	P
GO:0007586	34	0.0738	1	0.598	1	0.129	1	0.85	1	0.22	1	0.456	1	0.0648	1	0.355	1	digestion	P
GO:0007588	17	0.97	1	0.795	1	0.995	1	0.926	1	0.642	1	0.642	1	0.927	1	0.585	1	excretion	P
GO:0007595	25	0.968	1	0.893	1	0.994	1	0.993	1	0.921	1	0.868	1	0.438	1	0.758	1	lactation	P
GO:0007596	112	0.987	1	0.985	1	0.84	1	0.998	1	0.981	1	0.996	1	0.938	1	0.499	1	blood coagulation	P
GO:0007599	114	0.986	1	0.979	1	0.837	1	0.989	1	0.968	1	0.998	1	0.953	1	0.471	1	hemostasis	P
GO:0007600	263	0.994	1	1	1	0.998	1	0.999	1	0.993	1	1	1	0.585	1	0.782	1	sensory perception	P
GO:0007601	117	0.452	1	0.875	1	0.601	1	0.952	1	0.708	1	0.755	1	0.165	1	0.538	1	visual perception	P
GO:0007602	22	0.198	1	0.152	1	0.177	1	0.239	1	0.159	1	0.319	1	0.281	1	0.288	1	phototransduction	P
GO:0007605	74	0.997	1	0.972	1	0.999	1	0.97	1	0.998	1	0.993	1	0.847	1	0.589	1	sensory perception of sound	P
GO:0007606	47	0.951	1	0.804	1	0.869	1	0.554	1	0.739	1	0.951	1	0.906	1	0.453	1	sensory perception of chemical stimulus	P
GO:0007608	28	0.986	1	0.795	1	0.777	1	0.416	1	0.999	1	0.994	1	0.967	1	0.593	1	sensory perception of smell	P
GO:0007610	406	1	1	0.998	1	1	1	1	1	1	1	1	1	0.581	1	0.136	1	behavior	P
GO:0007611	81	0.371	1	0.597	1	0.744	1	0.527	1	0.68	1	0.86	1	0.0712	1	0.129	1	learning and/or memory	P
GO:0007612	53	0.875	1	0.73	1	0.969	1	0.507	1	0.778	1	0.767	1	0.452	1	0.803	1	learning	P
GO:0007613	25	0.247	1	0.841	1	0.586	1	0.702	1	0.493	1	0.91	1	0.107	1	0.338	1	memory	P
GO:0007617	14	0.971	1	0.993	1	0.934	1	0.98	1	0.832	1	0.974	1	0.776	1	0.963	1	mating behavior	P
GO:0007623	34	0.891	1	0.844	1	0.979	1	0.967	1	0.997	1	0.739	1	0.345	1	0.544	1	circadian rhythm	P
GO:0007626	267	0.996	1	0.998	1	0.997	1	1	1	0.996	1	1	1	0.611	1	0.234	1	locomotory behavior	P
GO:0007628	24	0.871	1	1	1	0.993	1	1	1	0.701	1	1	1	0.7	1	0.993	1	adult walking behavior	P
GO:0007631	45	1	1	0.998	1	1	1	0.998	1	0.881	1	1	1	0.947	1	0.442	1	feeding behavior	P
GO:0007632	27	0.505	1	0.968	1	0.86	1	0.828	1	0.275	1	0.996	1	0.376	1	0.972	1	visual behavior	P
GO:0008009	55	1	1	1	1	1	1	1	1	0.998	1	1	1	0.988	1	0.887	1	chemokine activity	F
GO:0008013	16	0.00489	0.348	0.00951	0.751	0.0024	0.118	0.0278	1	0.00503	0.135	0.0866	1	0.027	0.606	0.0356	1	beta-catenin binding	F
GO:0008015	130	1	1	1	1	0.999	1	1	1	1	1	1	1	0.886	1	1	1	circulation	P
GO:0008016	43	0.996	1	1	1	0.994	1	0.999	1	1	1	1	1	0.3	1	0.926	1	regulation of heart contraction	P
GO:0008017	58	6.19e-06	0.005	7.15e-06	0.003	0.000305	0.0161	0.00571	0.378	4.3e-05	0.00156	0.000158	0.0136	0.00529	0.094	0.00578	0.258	microtubule binding	F
GO:0008021	72	0.226	1	0.959	1	0.581	1	0.992	1	0.433	1	0.935	1	0.0405	0.834	0.62	1	synaptic vesicle	C
GO:0008022	68	0.0239	1	0.0166	1	0.00561	0.188	0.0111	0.378	0.12	1	0.123	1	0.291	1	0.0358	1	protein C-terminus binding	F
GO:0008026	98	7.07e-05	0.007	6.59e-07	0.00266	2.4e-06	0.001	3.89e-06	0.001	0.000787	0.044	0.000174	0.0136	0.0747	1	0.000896	0.033	ATP-dependent helicase activity	F
GO:0008028	16	0.222	1	0.745	1	0.199	1	0.465	1	0.446	1	0.942	1	0.68	1	0.363	1	monocarboxylic acid transporter activity	F
GO:0008033	57	0.0457	1	0.00154	0.075	0.0534	1	0.0394	1	0.0543	1	0.0106	0.401	0.336	1	0.00903	0.448	tRNA processing	P
GO:0008034	23	0.326	1	0.602	1	0.124	1	0.9	1	0.513	1	0.59	1	0.57	1	0.835	1	lipoprotein binding	F
GO:0008037	17	1	1	1	1	1	1	1	1	0.999	1	0.995	1	0.827	1	0.885	1	cell recognition	P
GO:0008038	11	1	1	1	1	1	1	1	1	1	1	1	1	0.805	1	0.997	1	neuron recognition	P
GO:0008045	13	0.957	1	1	1	0.899	1	1	1	0.841	1	1	1	0.994	1	1	1	motor axon guidance	P
GO:0008047	266	0.00416	0.186	0.00638	0.559	0.00685	0.283	0.12	1	0.00855	0.369	0.0663	1	0.263	1	0.0024	0.063	enzyme activator activity	F
GO:0008060	23	0.0221	1	0.147	1	0.0492	1	0.29	1	0.238	1	0.191	1	0.0284	0.606	0.0923	1	ARF GTPase activator activity	F
GO:0008064	51	0.0597	1	0.0338	1	0.226	1	0.0343	1	0.171	1	0.247	1	0.0495	1	0.0317	1	regulation of actin polymerization and/or depolymerization	P
GO:0008066	63	0.991	1	0.978	1	0.94	1	0.881	1	0.994	1	0.987	1	0.613	1	0.761	1	glutamate receptor activity	F
GO:0008067	45	0.991	1	0.864	1	0.836	1	0.802	1	0.998	1	0.871	1	0.904	1	0.585	1	metabotropic glutamate, GABA-B-like receptor activity	F
GO:0008076	133	0.387	1	0.992	1	0.67	1	0.934	1	0.461	1	1	1	0.553	1	0.969	1	voltage-gated potassium channel complex	C
GO:0008080	52	0.191	1	0.0286	1	0.0848	1	0.0262	0.769	0.469	1	0.264	1	0.72	1	0.107	1	N-acetyltransferase activity	F
GO:0008081	75	0.0683	1	0.282	1	0.00775	0.343	0.517	1	0.742	1	0.0973	1	0.0811	1	0.32	1	phosphoric diester hydrolase activity	F
GO:0008083	165	1	1	1	1	0.982	1	1	1	1	1	1	1	0.994	1	0.661	1	growth factor activity	F
GO:0008088	11	0.0231	1	0.0444	1	0.0282	1	0.0217	0.769	0.0371	1	0.0208	1	0.689	1	0.344	1	axon cargo transport	P
GO:0008092	436	8.31e-07	0.002	0.000193	0.028	0.0023	0.118	0.0342	1	2.67e-05	0.00156	0.0105	0.401	4.87e-06	0.002	0.000136	0.004	cytoskeletal protein binding	F
GO:0008094	33	5.56e-05	0.007	8.97e-07	0.00266	0.00397	0.188	0.000259	0.0115	0.00268	0.135	3.3e-05	0.002	0.000624	0.024	5.86e-05	0.00391	DNA-dependent ATPase activity	F
GO:0008104	929	1.04e-14	0	1.08e-23	0	2.48e-09	0	2.43e-17	0	1.59e-10	0	3.06e-13	0	4.25e-05	0.002	3.95e-09	0	protein localization	P
GO:0008105	10	0.937	1	0.886	1	1	1	0.885	1	0.524	1	0.795	1	0.842	1	0.986	1	asymmetric protein localization	P
GO:0008121	12	0.0975	1	0.0266	1	0.509	1	0.251	1	0.215	1	0.112	1	0.228	1	0.0844	1	ubiquinol-cytochrome-c reductase activity	F
GO:0008134	290	0.000627	0.052	1.71e-05	0.007	0.000222	0.0161	0.00042	0.013	0.0286	1	0.00315	0.143	0.176	1	0.0241	1	transcription factor binding	F
GO:0008135	129	4.73e-05	0.006	1.36e-07	0.00266	0.000101	0.0161	0.000111	0.0058	6.03e-05	0.00156	8.94e-07	0.002	0.376	1	0.0375	1	translation factor activity, nucleic acid binding	F
GO:0008137	30	0.0295	1	0.00187	0.162	0.074	1	0.00235	0.0652	0.413	1	0.0243	1	0.0635	1	0.0678	1	NADH dehydrogenase (ubiquinone) activity	F
GO:0008138	44	0.533	1	0.208	1	0.81	1	0.673	1	0.352	1	0.156	1	0.2	1	0.0912	1	protein tyrosine/serine/threonine phosphatase activity	F
GO:0008144	14	0.33	1	0.532	1	0.316	1	0.691	1	0.554	1	0.479	1	0.169	1	0.383	1	drug binding	F
GO:0008146	56	0.999	1	0.932	1	0.996	1	0.99	1	0.832	1	0.976	1	0.968	1	0.438	1	sulfotransferase activity	F
GO:0008150	13777	6.38e-17	0	8.88e-36	0	1.32e-07	0.000988	1.93e-21	0	2.15e-09	0	3.85e-15	0	5.81e-06	0.002	1.91e-13	0	biological_process	P
GO:0008152	8007	1.01e-25	0	0	0	1.25e-18	0	1.38e-39	0	2.88e-17	0	8.16e-37	0	0.000162	0.00645	5.53e-16	0	metabolism	P
GO:0008154	68	0.101	1	0.0404	1	0.3	1	0.0668	1	0.212	1	0.279	1	0.106	1	0.0185	0.94	actin polymerization and/or depolymerization	P
GO:0008156	12	0.00018	0.019	0.0882	1	0.0123	0.474	0.102	1	0.0191	0.719	0.157	1	0.0454	0.834	0.246	1	negative regulation of DNA replication	P
GO:0008168	183	5.95e-07	0.002	1.56e-08	0.00266	1.17e-05	0.00169	0.000142	0.0058	4.48e-06	0.000962	1.4e-07	0.00175	0.441	1	0.000411	0.021	methyltransferase activity	F
GO:0008170	57	0.0121	0.983	0.0169	1	0.0294	1	0.0835	1	0.0042	0.135	0.0125	1	0.929	1	0.0389	1	N-methyltransferase activity	F
GO:0008173	20	0.101	1	0.00793	0.559	0.0992	1	0.108	1	0.0493	1	0.0373	1	0.596	1	0.11	1	RNA methyltransferase activity	F
GO:0008180	10	0.0465	1	0.146	1	0.0375	1	0.191	1	0.47	1	0.815	1	0.483	1	0.0858	1	signalosome complex	C
GO:0008188	123	0.999	1	0.984	1	1	1	0.903	1	0.914	1	1	1	0.658	1	0.401	1	neuropeptide receptor activity	F
GO:0008194	95	0.775	1	0.769	1	0.823	1	0.605	1	0.728	1	0.628	1	0.598	1	0.523	1	UDP-glycosyltransferase activity	F
GO:0008199	13	0.903	1	0.663	1	0.781	1	0.293	1	0.728	1	0.633	1	0.979	1	1	1	ferric iron binding	F
GO:0008201	67	0.942	1	1	1	0.98	1	1	1	0.991	1	1	1	0.174	1	0.893	1	heparin binding	F
GO:0008202	176	0.538	1	0.875	1	0.646	1	0.997	1	0.5	1	0.697	1	0.399	1	0.407	1	steroid metabolism	P
GO:0008203	75	0.534	1	0.511	1	0.564	1	0.779	1	0.784	1	0.399	1	0.321	1	0.503	1	cholesterol metabolism	P
GO:0008206	14	0.215	1	0.758	1	0.378	1	0.995	1	0.156	1	0.677	1	0.706	1	0.013	0.94	bile acid metabolism	P
GO:0008207	20	0.96	1	1	1	0.854	1	0.985	1	0.778	1	0.998	1	0.999	1	0.937	1	C21-steroid hormone metabolism	P
GO:0008211	11	0.723	1	1	1	0.492	1	1	1	0.726	1	1	1	0.889	1	0.934	1	glucocorticoid metabolism	P
GO:0008213	35	0.00196	0.102	0.000302	0.042	0.00556	0.188	0.0032	0.142	0.00352	0.135	0.000525	0.02	0.0797	1	0.0161	0.94	protein amino acid alkylation	P
GO:0008217	60	1	1	1	1	1	1	1	1	0.996	1	1	1	0.92	1	0.998	1	blood pressure regulation	P
GO:0008219	793	0.00509	0.348	0.0602	1	0.0398	1	0.0636	1	0.0276	1	0.257	1	0.0483	1	0.116	1	cell death	P
GO:0008227	116	0.392	1	0.245	1	0.648	1	0.174	1	0.596	1	0.487	1	0.358	1	0.192	1	amine receptor activity	F
GO:0008233	756	0.315	1	0.239	1	0.619	1	0.58	1	0.866	1	0.63	1	0.0167	0.471	0.00681	0.258	peptidase activity	F
GO:0008234	172	0.0547	1	0.0168	1	0.16	1	0.00358	0.142	0.154	1	0.276	1	0.0446	0.834	0.0267	1	cysteine-type peptidase activity	F
GO:0008235	61	0.266	1	0.39	1	0.109	1	0.214	1	0.372	1	0.328	1	0.505	1	0.943	1	metalloexopeptidase activity	F
GO:0008236	257	0.938	1	0.78	1	0.93	1	0.998	1	1	1	0.93	1	0.188	1	0.004	0.216	serine-type peptidase activity	F
GO:0008237	217	0.286	1	0.595	1	0.257	1	0.611	1	0.376	1	0.483	1	0.14	1	0.838	1	metallopeptidase activity	F
GO:0008238	105	0.619	1	0.434	1	0.392	1	0.192	1	0.611	1	0.738	1	0.835	1	0.594	1	exopeptidase activity	F
GO:0008239	12	0.0517	1	0.193	1	0.0528	1	0.531	1	0.341	1	0.163	1	0.0554	1	0.329	1	dipeptidyl-peptidase activity	F
GO:0008252	10	0.162	1	0.371	1	0.358	1	0.367	1	0.126	1	0.409	1	0.0969	1	0.69	1	nucleotidase activity	F
GO:0008270	2140	2.19e-08	0.000973	1.43e-19	0	9.49e-10	0	2.03e-16	0	2.13e-07	0	2.8e-14	0	0.0785	1	0.000556	0.021	zinc ion binding	F
GO:0008271	11	0.201	1	0.979	1	0.281	1	0.97	1	0.105	1	0.879	1	0.336	1	0.994	1	sulfate porter activity	F
GO:0008272	16	0.143	1	0.869	1	0.326	1	0.637	1	0.0916	1	0.913	1	0.188	1	0.842	1	sulfate transport	P
GO:0008276	43	3.29e-05	0.006	3.1e-07	0.00266	0.000205	0.0161	5.74e-05	0.0058	0.000285	0.008	7.28e-06	0.002	0.0989	1	0.000256	0.017	protein methyltransferase activity	F
GO:0008277	20	0.881	1	0.342	1	0.452	1	0.715	1	0.805	1	0.185	1	0.983	1	0.247	1	regulation of G-protein coupled receptor protein signaling pathway	P
GO:0008283	636	0.996	1	0.996	1	0.99	1	0.777	1	0.987	1	0.997	1	0.933	1	0.997	1	cell proliferation	P
GO:0008284	250	0.999	1	0.987	1	0.997	1	0.674	1	0.998	1	0.993	1	0.988	1	0.998	1	positive regulation of cell proliferation	P
GO:0008285	196	0.992	1	0.996	1	1	1	0.62	1	0.96	1	1	1	0.516	1	1	1	negative regulation of cell proliferation	P
GO:0008286	30	0.21	1	0.175	1	0.374	1	0.109	1	0.379	1	0.457	1	0.114	1	0.158	1	insulin receptor signaling pathway	P
GO:0008287	40	0.0355	1	0.208	1	0.0392	1	0.192	1	0.168	1	0.421	1	0.477	1	0.314	1	protein serine/threonine phosphatase complex	C
GO:0008289	324	0.195	1	0.049	1	0.472	1	0.75	1	0.361	1	0.137	1	0.0944	1	0.00702	0.258	lipid binding	F
GO:0008299	19	0.0446	1	0.32	1	0.135	1	0.24	1	0.358	1	0.264	1	0.133	1	0.966	1	isoprenoid biosynthesis	P
GO:0008305	34	0.064	1	0.293	1	0.0477	1	0.503	1	0.161	1	0.256	1	0.232	1	0.339	1	integrin complex	C
GO:0008306	13	0.664	1	0.792	1	0.59	1	0.677	1	0.626	1	0.681	1	0.819	1	0.887	1	associative learning	P
GO:0008307	10	0.169	1	0.876	1	0.341	1	0.879	1	0.815	1	0.818	1	0.0725	1	0.541	1	structural constituent of muscle	F
GO:0008312	13	0.198	1	0.00451	0.382	0.357	1	0.0123	0.378	0.105	1	0.00859	0.355	0.642	1	0.216	1	7S RNA binding	F
GO:0008318	12	0.679	1	0.449	1	0.636	1	0.225	1	0.674	1	0.618	1	0.622	1	0.371	1	protein prenyltransferase activity	F
GO:0008324	694	0.0964	1	0.845	1	0.879	1	0.97	1	0.376	1	0.978	1	0.00428	0.0775	0.194	1	cation transporter activity	F
GO:0008344	52	0.418	1	0.997	1	0.419	1	0.974	1	0.353	1	0.999	1	0.612	1	0.957	1	adult locomotory behavior	P
GO:0008360	51	0.0346	1	0.0482	1	0.0495	1	0.111	1	0.248	1	0.206	1	0.0575	1	0.0666	1	regulation of cell shape	P
GO:0008361	161	0.373	1	0.774	1	0.582	1	0.44	1	0.988	1	0.945	1	0.0167	0.471	0.633	1	regulation of cell size	P
GO:0008366	38	0.352	1	0.542	1	0.442	1	0.672	1	0.381	1	0.702	1	0.409	1	0.17	1	axon ensheathment	P
GO:0008373	21	0.364	1	0.818	1	0.57	1	0.991	1	1	1	0.695	1	0.0114	0.439	0.129	1	sialyltransferase activity	F
GO:0008374	36	0.033	1	0.0392	1	0.0342	1	0.0418	1	0.235	1	0.102	1	0.289	1	0.405	1	O-acyltransferase activity	F
GO:0008375	31	0.791	1	0.406	1	0.458	1	0.402	1	0.789	1	0.57	1	0.823	1	0.321	1	acetylglucosaminyltransferase activity	F
GO:0008376	27	0.796	1	0.788	1	0.999	1	0.915	1	0.802	1	0.652	1	0.194	1	0.234	1	acetylgalactosaminyltransferase activity	F
GO:0008378	32	0.972	1	0.797	1	0.979	1	0.772	1	0.984	1	0.391	1	0.819	1	0.563	1	galactosyltransferase activity	F
GO:0008380	189	5.17e-07	0.002	2.46e-15	0	2.69e-05	0.003	2.05e-12	0	0.000935	0.044	1.36e-10	0.000771	0.367	1	0.0556	1	RNA splicing	P
GO:0008406	66	0.814	1	0.321	1	0.557	1	0.448	1	0.788	1	0.467	1	0.932	1	0.377	1	gonad development	P
GO:0008408	21	0.00567	0.348	0.0354	1	0.0169	0.81	0.103	1	0.0221	1	0.0305	1	0.0175	0.471	0.236	1	3'-5' exonuclease activity	F
GO:0008415	186	0.00832	0.618	0.000546	0.073	0.00571	0.188	0.00142	0.044	0.105	1	0.0169	1	0.276	1	0.0345	1	acyltransferase activity	F
GO:0008417	11	0.36	1	0.924	1	0.42	1	0.638	1	0.278	1	1	1	0.73	1	0.862	1	fucosyltransferase activity	F
GO:0008430	30	0.0233	1	0.0343	1	0.387	1	0.00675	0.378	0.0455	1	0.17	1	0.0864	1	0.429	1	selenium binding	F
GO:0008443	11	0.786	1	0.499	1	0.263	1	0.678	1	0.994	1	0.466	1	0.578	1	0.45	1	phosphofructokinase activity	F
GO:0008483	26	0.0523	1	0.0263	1	0.166	1	0.229	1	0.0676	1	0.0133	1	0.0311	0.753	0.0712	1	transaminase activity	F
GO:0008484	14	0.837	1	0.785	1	0.993	1	0.803	1	0.841	1	0.785	1	0.434	1	0.701	1	sulfuric ester hydrolase activity	F
GO:0008493	22	0.199	1	0.22	1	0.899	1	0.543	1	0.316	1	0.238	1	0.0677	1	0.177	1	tetracycline transporter activity	F
GO:0008509	166	0.435	1	0.999	1	0.84	1	0.999	1	0.719	1	0.99	1	0.149	1	0.97	1	anion transporter activity	F
GO:0008514	11	0.282	1	0.948	1	0.531	1	0.681	1	0.456	1	0.935	1	0.0552	1	0.94	1	organic anion transporter activity	F
GO:0008528	301	1	1	1	1	1	1	0.99	1	0.99	1	1	1	0.679	1	0.712	1	peptide receptor activity, G-protein coupled	F
GO:0008533	15	0.909	1	0.962	1	0.875	1	0.735	1	0.82	1	0.616	1	0.525	1	0.996	1	astacin activity	F
GO:0008542	26	0.541	1	0.983	1	0.88	1	0.869	1	0.302	1	1	1	0.423	1	0.96	1	visual learning	P
GO:0008543	15	0.99	1	0.937	1	1	1	1	1	0.86	1	0.354	1	0.94	1	0.984	1	fibroblast growth factor receptor signaling pathway	P
GO:0008544	124	0.994	1	0.969	1	0.949	1	0.573	1	0.906	1	1	1	0.976	1	0.902	1	epidermis development	P
GO:0008553	23	0.3	1	0.393	1	0.892	1	0.641	1	0.238	1	0.208	1	0.214	1	0.671	1	hydrogen-exporting ATPase activity, phosphorylative mechanism	F
GO:0008565	124	8.81e-06	0.005	1.9e-13	0	0.000101	0.0161	4.3e-09	0	0.00102	0.044	2.19e-07	0.00175	0.0218	0.56	1.23e-05	0.00391	protein transporter activity	F
GO:0008584	26	0.928	1	0.503	1	0.988	1	0.386	1	0.784	1	0.692	1	0.995	1	0.985	1	male gonad development	P
GO:0008585	43	0.496	1	0.29	1	0.19	1	0.661	1	0.828	1	0.366	1	0.562	1	0.0939	1	female gonad development	P
GO:0008589	14	0.646	1	0.855	1	0.978	1	0.87	1	0.843	1	0.836	1	0.0801	1	0.827	1	regulation of smoothened signaling pathway	P
GO:0008601	21	0.156	1	0.688	1	0.12	1	0.491	1	0.186	1	0.774	1	0.898	1	0.809	1	protein phosphatase type 2A regulator activity	F
GO:0008603	26	0.54	1	0.365	1	0.972	1	0.59	1	0.275	1	0.684	1	0.418	1	0.0368	1	cAMP-dependent protein kinase regulator activity	F
GO:0008610	299	0.0587	1	0.191	1	0.0611	1	0.263	1	0.259	1	0.162	1	0.184	1	0.512	1	lipid biosynthesis	P
GO:0008624	22	0.776	1	0.0647	1	0.781	1	0.0487	1	0.799	1	0.149	1	0.4	1	0.25	1	induction of apoptosis by extracellular signals	P
GO:0008629	33	0.00591	0.364	0.0203	1	0.0487	1	0.00909	0.378	0.0199	0.719	0.0256	1	0.0304	0.753	0.233	1	induction of apoptosis by intracellular signals	P
GO:0008630	20	0.0384	1	0.00907	0.559	0.135	1	0.0122	0.378	0.118	1	0.0142	1	0.0521	1	0.0633	1	DNA damage response, signal transduction resulting in induction of apoptosis	P
GO:0008632	74	0.00164	0.093	0.0018	0.162	0.0143	0.81	0.00152	0.044	0.00669	0.165	0.0315	1	0.0373	0.783	0.0334	1	apoptotic program	P
GO:0008637	24	0.0379	1	0.1	1	0.267	1	0.0301	1	0.109	1	0.2	1	0.147	1	0.629	1	apoptotic mitochondrial changes	P
GO:0008641	10	0.302	1	0.107	1	0.234	1	0.215	1	0.446	1	0.0214	1	0.61	1	0.634	1	small protein activating enzyme activity	F
GO:0008643	76	0.568	1	0.887	1	0.996	1	0.978	1	0.599	1	0.974	1	0.0662	1	0.297	1	carbohydrate transport	P
GO:0008645	41	0.797	1	0.974	1	1	1	0.985	1	0.832	1	0.999	1	0.198	1	0.518	1	hexose transport	P
GO:0008652	88	0.131	1	0.205	1	0.322	1	0.345	1	0.185	1	0.136	1	0.247	1	0.452	1	amino acid biosynthesis	P
GO:0008654	75	0.0476	1	0.0878	1	0.00683	0.283	0.0196	0.769	0.19	1	0.191	1	0.745	1	0.93	1	phospholipid biosynthesis	P
GO:0008667	47	0.241	1	0.501	1	0.235	1	0.563	1	0.482	1	0.404	1	0.204	1	0.635	1	2,3-dihydro-2,3-dihydroxybenzoate dehydrogenase activity	F
GO:0008757	80	5.89e-06	0.005	2.91e-08	0.00266	0.000134	0.0161	1.24e-05	0.00177	0.000187	0.008	7.35e-06	0.002	0.195	1	0.000144	0.004	S-adenosylmethionine-dependent methyltransferase activity	F
GO:0008943	22	1	1	0.787	1	1	1	1	1	0.763	1	0.293	1	0.937	1	1	1	glyceraldehyde-3-phosphate dehydrogenase activity	F
GO:0009055	343	0.0223	1	0.0603	1	0.218	1	0.113	1	0.072	1	0.295	1	0.00457	0.0775	0.0273	1	electron carrier activity	F
GO:0009056	654	1.59e-10	0.000973	5.42e-11	0.00266	1.19e-07	0.000988	6e-08	0	5.25e-05	0.00156	7.29e-07	0.002	1.09e-05	0.002	1.06e-06	0.00391	catabolism	P
GO:0009057	362	2.11e-09	0.000973	7.06e-11	0.00266	2.76e-07	0.000988	1.12e-08	0	1.36e-06	0.000765	8.14e-07	0.002	0.00476	0.0775	7.59e-05	0.00391	macromolecule catabolism	P
GO:0009058	1446	0.000987	0.093	8.89e-08	0.00266	0.0137	0.81	7.39e-06	0.00177	0.00787	0.318	6.73e-05	0.00536	0.415	1	0.00319	0.216	biosynthesis	P
GO:0009059	800	0.0121	0.983	3.6e-07	0.00266	0.00597	0.188	2.06e-05	0.00192	0.0431	1	5.69e-05	0.00536	0.814	1	0.0222	1	macromolecule biosynthesis	P
GO:0009060	27	0.00373	0.186	0.0662	1	0.0302	1	0.0212	0.769	0.0781	1	0.262	1	0.0158	0.439	0.13	1	aerobic respiration	P
GO:0009063	56	0.277	1	0.0505	1	0.279	1	0.33	1	0.441	1	0.0343	1	0.0868	1	0.0724	1	amino acid catabolism	P
GO:0009064	40	0.216	1	0.0676	1	0.37	1	0.0244	0.769	0.107	1	0.115	1	0.574	1	0.233	1	glutamine family amino acid metabolism	P
GO:0009065	10	0.297	1	0.539	1	0.556	1	0.309	1	0.17	1	0.677	1	0.284	1	0.755	1	glutamine family amino acid catabolism	P
GO:0009066	23	0.235	1	0.799	1	0.279	1	0.652	1	0.0822	1	0.905	1	0.715	1	0.46	1	aspartate family amino acid metabolism	P
GO:0009067	13	0.0904	1	0.251	1	0.298	1	0.22	1	0.0487	1	0.638	1	0.382	1	0.13	1	aspartate family amino acid biosynthesis	P
GO:0009069	23	0.0842	1	0.000577	0.073	0.0409	1	0.0103	0.378	0.148	1	7.65e-05	0.00536	0.273	1	0.00927	0.448	serine family amino acid metabolism	P
GO:0009071	10	0.047	1	0.0184	1	0.0245	1	0.0638	1	0.218	1	0.00591	0.202	0.145	1	0.0468	1	serine family amino acid catabolism	P
GO:0009072	74	0.238	1	0.654	1	0.418	1	0.902	1	0.378	1	0.411	1	0.116	1	0.497	1	aromatic amino acid family metabolism	P
GO:0009073	48	0.264	1	0.536	1	0.257	1	0.606	1	0.508	1	0.422	1	0.218	1	0.646	1	aromatic amino acid family biosynthesis	P
GO:0009074	12	0.503	1	0.597	1	0.823	1	0.986	1	0.454	1	0.369	1	0.211	1	0.366	1	aromatic amino acid family catabolism	P
GO:0009075	11	0.898	1	0.6	1	0.825	1	0.447	1	0.982	1	0.767	1	0.376	1	0.374	1	histidine family amino acid metabolism	P
GO:0009077	11	0.898	1	0.6	1	0.825	1	0.447	1	0.982	1	0.767	1	0.376	1	0.374	1	histidine family amino acid catabolism	P
GO:0009081	12	0.146	1	0.0748	1	0.139	1	0.349	1	0.206	1	0.182	1	0.238	1	0.13	1	branched chain family amino acid metabolism	P
GO:0009084	16	0.185	1	0.287	1	0.44	1	0.216	1	0.179	1	0.214	1	0.299	1	0.676	1	glutamine family amino acid biosynthesis	P
GO:0009100	110	0.451	1	0.016	1	0.506	1	0.122	1	0.874	1	0.106	1	0.128	1	0.000678	0.033	glycoprotein metabolism	P
GO:0009101	93	0.465	1	0.0304	1	0.624	1	0.138	1	0.864	1	0.147	1	0.124	1	0.00233	0.063	glycoprotein biosynthesis	P
GO:0009108	87	0.104	1	0.04	1	0.477	1	0.0859	1	0.0943	1	0.282	1	0.163	1	0.0337	1	coenzyme biosynthesis	P
GO:0009109	29	0.0322	1	0.0451	1	0.0306	1	0.0531	1	0.214	1	0.185	1	0.0642	1	0.0163	0.94	coenzyme catabolism	P
GO:0009110	25	0.563	1	0.128	1	0.257	1	0.163	1	0.723	1	0.408	1	0.805	1	0.202	1	vitamin biosynthesis	P
GO:0009112	18	0.145	1	0.127	1	0.0439	1	0.112	1	0.128	1	0.0955	1	0.9	1	0.335	1	nucleobase metabolism	P
GO:0009116	27	0.378	1	0.00905	0.559	0.205	1	0.0125	0.378	0.783	1	0.00519	0.202	0.137	1	0.0847	1	nucleoside metabolism	P
GO:0009117	199	0.0531	1	0.0217	1	0.573	1	0.0682	1	0.0358	1	0.0594	1	0.0773	1	0.127	1	nucleotide metabolism	P
GO:0009119	10	0.427	1	0.0257	1	0.745	1	0.0365	1	0.645	1	0.0194	1	0.0806	1	0.0786	1	ribonucleoside metabolism	P
GO:0009123	21	0.295	1	0.0014	0.075	0.52	1	0.004	0.142	0.257	1	0.0609	1	0.367	1	0.0855	1	nucleoside monophosphate metabolism	P
GO:0009124	20	0.25	1	0.0024	0.187	0.442	1	0.00729	0.378	0.207	1	0.0782	1	0.306	1	0.101	1	nucleoside monophosphate biosynthesis	P
GO:0009126	15	0.251	1	0.00224	0.162	0.569	1	0.00709	0.378	0.158	1	0.121	1	0.498	1	0.0645	1	purine nucleoside monophosphate metabolism	P
GO:0009127	14	0.201	1	0.00485	0.382	0.481	1	0.0149	0.769	0.113	1	0.163	1	0.407	1	0.0833	1	purine nucleoside monophosphate biosynthesis	P
GO:0009132	14	0.709	1	0.139	1	0.709	1	0.225	1	0.259	1	0.19	1	0.772	1	0.288	1	nucleoside diphosphate metabolism	P
GO:0009141	68	0.105	1	0.0548	1	0.448	1	0.0919	1	0.0657	1	0.0662	1	0.36	1	0.231	1	nucleoside triphosphate metabolism	P
GO:0009142	50	0.288	1	0.224	1	0.688	1	0.237	1	0.118	1	0.286	1	0.646	1	0.429	1	nucleoside triphosphate biosynthesis	P
GO:0009144	59	0.135	1	0.126	1	0.533	1	0.212	1	0.07	1	0.14	1	0.489	1	0.282	1	purine nucleoside triphosphate metabolism	P
GO:0009145	46	0.306	1	0.33	1	0.735	1	0.409	1	0.108	1	0.404	1	0.69	1	0.446	1	purine nucleoside triphosphate biosynthesis	P
GO:0009147	16	0.0915	1	0.0592	1	0.0522	1	0.0784	1	0.0707	1	0.0362	1	0.601	1	0.323	1	pyrimidine nucleoside triphosphate metabolism	P
GO:0009150	74	0.166	1	0.04	1	0.707	1	0.0432	1	0.0704	1	0.0874	1	0.495	1	0.15	1	purine ribonucleotide metabolism	P
GO:0009152	62	0.19	1	0.081	1	0.693	1	0.0903	1	0.0619	1	0.162	1	0.628	1	0.237	1	purine ribonucleotide biosynthesis	P
GO:0009156	18	0.296	1	0.00142	0.075	0.447	1	0.00586	0.378	0.25	1	0.0453	1	0.455	1	0.0676	1	ribonucleoside monophosphate biosynthesis	P
GO:0009161	19	0.349	1	0.000787	0.073	0.528	1	0.00305	0.142	0.307	1	0.0338	1	0.533	1	0.0554	1	ribonucleoside monophosphate metabolism	P
GO:0009165	132	0.282	1	0.0338	1	0.786	1	0.0465	1	0.118	1	0.181	1	0.519	1	0.145	1	nucleotide biosynthesis	P
GO:0009166	27	0.471	1	0.941	1	0.517	1	0.754	1	0.464	1	0.734	1	0.677	1	0.99	1	nucleotide catabolism	P
GO:0009167	15	0.251	1	0.00224	0.162	0.569	1	0.00709	0.378	0.158	1	0.121	1	0.498	1	0.0645	1	purine ribonucleoside monophosphate metabolism	P
GO:0009168	14	0.201	1	0.00485	0.382	0.481	1	0.0149	0.769	0.113	1	0.163	1	0.407	1	0.0833	1	purine ribonucleoside monophosphate biosynthesis	P
GO:0009187	46	0.98	1	1	1	0.999	1	0.999	1	0.999	1	1	1	0.694	1	0.959	1	cyclic nucleotide metabolism	P
GO:0009190	34	0.946	1	1	1	0.999	1	0.986	1	0.997	1	1	1	0.643	1	0.997	1	cyclic nucleotide biosynthesis	P
GO:0009199	57	0.207	1	0.126	1	0.591	1	0.19	1	0.111	1	0.158	1	0.512	1	0.282	1	ribonucleoside triphosphate metabolism	P
GO:0009200	10	0.17	1	0.0606	1	0.343	1	0.0708	1	0.21	1	0.0601	1	0.063	1	0.301	1	deoxyribonucleoside triphosphate metabolism	P
GO:0009201	47	0.299	1	0.293	1	0.708	1	0.346	1	0.113	1	0.363	1	0.692	1	0.448	1	ribonucleoside triphosphate biosynthesis	P
GO:0009205	55	0.223	1	0.167	1	0.652	1	0.253	1	0.109	1	0.21	1	0.521	1	0.29	1	purine ribonucleoside triphosphate metabolism	P
GO:0009206	46	0.306	1	0.33	1	0.735	1	0.409	1	0.108	1	0.404	1	0.69	1	0.446	1	purine ribonucleoside triphosphate biosynthesis	P
GO:0009208	12	0.0992	1	0.0731	1	0.0469	1	0.104	1	0.0629	1	0.0678	1	0.771	1	0.286	1	pyrimidine ribonucleoside triphosphate metabolism	P
GO:0009209	12	0.0992	1	0.0731	1	0.0469	1	0.104	1	0.0629	1	0.0678	1	0.771	1	0.286	1	pyrimidine ribonucleoside triphosphate biosynthesis	P
GO:0009218	14	0.135	1	0.0402	1	0.0665	1	0.0912	1	0.0655	1	0.0386	1	0.87	1	0.194	1	pyrimidine ribonucleotide metabolism	P
GO:0009220	14	0.135	1	0.0402	1	0.0665	1	0.0912	1	0.0655	1	0.0386	1	0.87	1	0.194	1	pyrimidine ribonucleotide biosynthesis	P
GO:0009225	15	0.00449	0.228	0.411	1	0.0661	1	0.446	1	0.113	1	0.449	1	0.033	0.753	0.445	1	nucleotide-sugar metabolism	P
GO:0009237	47	0.241	1	0.501	1	0.235	1	0.563	1	0.482	1	0.404	1	0.204	1	0.635	1	siderophore metabolism	P
GO:0009238	47	0.241	1	0.501	1	0.235	1	0.563	1	0.482	1	0.404	1	0.204	1	0.635	1	enterobactin metabolism	P
GO:0009239	47	0.241	1	0.501	1	0.235	1	0.563	1	0.482	1	0.404	1	0.204	1	0.635	1	enterobactin biosynthesis	P
GO:0009250	26	0.106	1	0.963	1	0.281	1	0.997	1	0.0633	1	0.733	1	0.151	1	0.633	1	glucan biosynthesis	P
GO:0009259	82	0.197	1	0.0106	0.751	0.661	1	0.0142	0.769	0.0901	1	0.0276	1	0.553	1	0.1	1	ribonucleotide metabolism	P
GO:0009260	68	0.212	1	0.0201	1	0.638	1	0.0287	1	0.0761	1	0.0533	1	0.658	1	0.147	1	ribonucleotide biosynthesis	P
GO:0009262	15	0.1	1	0.0463	1	0.219	1	0.0524	1	0.0937	1	0.0498	1	0.096	1	0.288	1	deoxyribonucleotide metabolism	P
GO:0009266	202	0.999	1	0.933	1	0.988	1	0.331	1	0.959	1	0.987	1	1	1	1	1	response to temperature stimulus	P
GO:0009267	12	0.24	1	0.986	1	0.528	1	0.427	1	0.517	1	1	1	0.187	1	0.828	1	cellular response to starvation	P
GO:0009288	37	0.175	1	0.967	1	0.82	1	0.854	1	0.0913	1	1	1	0.196	1	0.61	1	flagellum (sensu Bacteria)	C
GO:0009296	14	0.0353	1	0.018	1	0.0816	1	0.00432	0.142	0.374	1	0.0318	1	0.166	1	0.568	1	flagellum biogenesis	P
GO:0009306	56	0.118	1	0.307	1	0.625	1	0.417	1	0.402	1	0.558	1	0.0409	0.834	0.165	1	protein secretion	P
GO:0009308	521	0.112	1	0.163	1	0.342	1	0.24	1	0.425	1	0.212	1	0.0834	1	0.178	1	amine metabolism	P
GO:0009309	118	0.166	1	0.409	1	0.553	1	0.624	1	0.382	1	0.399	1	0.25	1	0.327	1	amine biosynthesis	P
GO:0009310	65	0.364	1	0.0641	1	0.404	1	0.169	1	0.473	1	0.118	1	0.142	1	0.102	1	amine catabolism	P
GO:0009311	10	0.46	1	0.155	1	0.493	1	0.198	1	0.824	1	0.287	1	0.341	1	0.186	1	oligosaccharide metabolism	P
GO:0009314	120	0.000177	0.019	0.0116	0.751	0.00806	0.343	0.0241	0.769	0.00254	0.135	0.0899	1	0.00302	0.0554	0.0365	1	response to radiation	P
GO:0009331	12	0.162	1	0.271	1	0.195	1	0.269	1	0.828	1	0.494	1	0.134	1	0.424	1	glycerol-3-phosphate dehydrogenase complex	C
GO:0009395	14	0.148	1	0.476	1	0.0392	1	0.532	1	0.58	1	0.441	1	0.479	1	0.431	1	phospholipid catabolism	P
GO:0009396	10	0.441	1	0.0172	1	0.928	1	0.116	1	0.235	1	0.0794	1	0.242	1	0.00127	0.044	folic acid and derivative biosynthesis	P
GO:0009405	30	0.151	1	0.472	1	0.167	1	0.627	1	0.24	1	0.516	1	0.364	1	0.302	1	pathogenesis	P
GO:0009408	15	0.178	1	0.52	1	0.0939	1	0.374	1	0.17	1	0.385	1	0.496	1	0.784	1	response to heat	P
GO:0009409	180	1	1	0.933	1	0.998	1	0.308	1	0.992	1	0.989	1	1	1	1	1	response to cold	P
GO:0009410	16	0.333	1	0.786	1	0.552	1	0.996	1	0.3	1	0.568	1	0.22	1	0.445	1	response to xenobiotic stimulus	P
GO:0009411	40	0.00163	0.093	0.00865	0.559	0.0405	1	0.00456	0.142	0.0201	0.719	0.0717	1	0.0127	0.439	0.0352	1	response to UV	P
GO:0009416	94	0.00412	0.186	0.115	1	0.065	1	0.0478	1	0.0151	0.481	0.458	1	0.0316	0.753	0.219	1	response to light stimulus	P
GO:0009434	23	0.18	1	0.417	1	0.763	1	0.29	1	0.13	1	0.409	1	0.648	1	0.677	1	flagellum (sensu Eukaryota)	C
GO:0009451	31	0.164	1	0.00111	0.073	0.08	1	0.0604	1	0.105	1	0.0109	0.401	0.908	1	0.0203	1	RNA modification	P
GO:0009566	58	0.308	1	0.0572	1	0.107	1	0.0321	1	0.996	1	0.114	1	0.227	1	0.489	1	fertilization	P
GO:0009581	54	0.396	1	0.802	1	0.331	1	0.786	1	0.794	1	0.728	1	0.171	1	0.677	1	detection of external stimulus	P
GO:0009582	44	0.444	1	0.807	1	0.274	1	0.904	1	0.572	1	0.639	1	0.398	1	0.695	1	detection of abiotic stimulus	P
GO:0009583	25	0.117	1	0.169	1	0.105	1	0.265	1	0.132	1	0.296	1	0.181	1	0.384	1	detection of light stimulus	P
GO:0009593	14	0.856	1	0.991	1	0.887	1	0.968	1	0.819	1	0.993	1	0.277	1	0.84	1	detection of chemical stimulus	P
GO:0009595	11	0.253	1	0.424	1	0.604	1	0.391	1	0.996	1	0.691	1	0.0512	1	0.221	1	detection of biotic stimulus	P
GO:0009605	696	0.997	1	1	1	0.992	1	1	1	1	1	1	1	0.487	1	0.555	1	response to external stimulus	P
GO:0009607	228	0.0729	1	0.991	1	0.237	1	0.69	1	0.446	1	0.967	1	0.0129	0.439	1	1	response to biotic stimulus	P
GO:0009611	449	1	1	1	1	1	1	1	1	1	1	1	1	0.933	1	0.881	1	response to wounding	P
GO:0009612	30	0.98	1	0.943	1	0.924	1	0.999	1	0.989	1	0.567	1	0.841	1	0.747	1	response to mechanical stimulus	P
GO:0009615	58	0.914	1	1	1	0.711	1	0.977	1	0.948	1	0.994	1	0.819	1	1	1	response to virus	P
GO:0009617	99	0.4	1	0.949	1	0.832	1	0.581	1	0.815	1	0.952	1	0.0285	0.606	0.999	1	response to bacterium	P
GO:0009620	14	0.00764	0.618	0.937	1	0.0523	1	0.889	1	0.0374	1	0.803	1	0.032	0.753	0.503	1	response to fungus	P
GO:0009628	375	0.543	1	0.441	1	0.631	1	0.135	1	0.237	1	0.626	1	0.868	1	0.903	1	response to abiotic stimulus	P
GO:0009636	31	0.412	1	0.535	1	0.806	1	0.906	1	0.49	1	0.362	1	0.25	1	0.427	1	response to toxin	P
GO:0009653	1308	1	1	1	1	1	1	1	1	1	1	1	1	0.95	1	0.999	1	morphogenesis	P
GO:0009698	48	0.264	1	0.536	1	0.257	1	0.606	1	0.508	1	0.422	1	0.218	1	0.646	1	phenylpropanoid metabolism	P
GO:0009712	47	0.241	1	0.501	1	0.235	1	0.563	1	0.482	1	0.404	1	0.204	1	0.635	1	catechol metabolism	P
GO:0009719	414	2.85e-06	0.002	1.48e-09	0.00266	1.92e-05	0.003	7.22e-07	0.001	6.74e-05	0.00156	1.46e-07	0.00175	0.116	1	0.000735	0.033	response to endogenous stimulus	P
GO:0009725	97	0.935	1	0.968	1	0.624	1	0.998	1	0.945	1	0.862	1	0.998	1	0.607	1	response to hormone stimulus	P
GO:0009743	24	0.439	1	0.283	1	0.519	1	0.524	1	0.467	1	0.452	1	0.262	1	0.0475	1	response to carbohydrate stimulus	P
GO:0009746	20	0.385	1	0.245	1	0.418	1	0.404	1	0.301	1	0.362	1	0.459	1	0.0826	1	response to hexose stimulus	P
GO:0009749	20	0.385	1	0.245	1	0.418	1	0.404	1	0.301	1	0.362	1	0.459	1	0.0826	1	response to glucose stimulus	P
GO:0009755	11	0.47	1	0.26	1	0.539	1	0.14	1	0.353	1	0.428	1	0.892	1	0.183	1	hormone-mediated signaling	P
GO:0009790	518	1	1	0.995	1	1	1	0.958	1	1	1	1	1	1	1	0.954	1	embryonic development	P
GO:0009791	88	0.571	1	0.509	1	0.675	1	0.914	1	0.556	1	0.628	1	0.261	1	0.0745	1	post-embryonic development	P
GO:0009792	304	1	1	0.676	1	1	1	0.336	1	1	1	0.824	1	1	1	0.906	1	embryonic development (sensu Metazoa)	P
GO:0009798	18	0.791	1	0.227	1	0.991	1	0.478	1	0.269	1	0.146	1	0.862	1	0.193	1	axis specification	P
GO:0009799	36	0.961	1	0.755	1	0.975	1	0.761	1	0.867	1	0.745	1	0.988	1	0.638	1	determination of symmetry	P
GO:0009855	36	0.961	1	0.755	1	0.975	1	0.761	1	0.867	1	0.745	1	0.988	1	0.638	1	determination of bilateral symmetry	P
GO:0009880	46	0.99	1	0.964	1	1	1	1	1	0.953	1	0.649	1	0.616	1	0.873	1	embryonic pattern specification	P
GO:0009881	11	0.536	1	0.974	1	0.694	1	0.634	1	0.92	1	1	1	0.127	1	0.2	1	photoreceptor activity	F
GO:0009887	734	1	1	1	1	1	1	0.998	1	1	1	1	1	1	1	1	1	organ morphogenesis	P
GO:0009888	384	1	1	0.999	1	1	1	0.855	1	1	1	1	1	0.996	1	0.95	1	tissue development	P
GO:0009889	203	0.155	1	0.338	1	0.0976	1	0.391	1	0.511	1	0.393	1	0.405	1	0.437	1	regulation of biosynthesis	P
GO:0009890	47	0.0372	1	0.0143	1	0.0118	0.474	0.0395	1	0.158	1	0.123	1	0.248	1	0.00642	0.258	negative regulation of biosynthesis	P
GO:0009891	88	0.711	1	0.999	1	0.964	1	1	1	0.988	1	0.997	1	0.1	1	0.757	1	positive regulation of biosynthesis	P
GO:0009892	454	0.0413	1	0.0022	0.162	0.117	1	0.00064	0.027	0.0915	1	0.0758	1	0.0625	1	0.0549	1	negative regulation of metabolism	P
GO:0009893	573	0.633	1	0.991	1	0.676	1	0.893	1	0.99	1	1	1	0.312	1	0.569	1	positive regulation of metabolism	P
GO:0009894	32	0.016	0.983	0.113	1	0.062	1	0.047	1	0.0549	1	0.101	1	0.0856	1	0.448	1	regulation of catabolism	P
GO:0009896	10	0.735	1	0.757	1	0.601	1	0.413	1	0.849	1	0.782	1	0.871	1	0.936	1	positive regulation of catabolism	P
GO:0009897	148	0.999	1	0.983	1	0.997	1	1	1	1	1	1	1	0.427	1	0.175	1	external side of plasma membrane	C
GO:0009913	57	0.988	1	1	1	0.703	1	1	1	0.911	1	1	1	0.967	1	0.947	1	epidermal cell differentiation	P
GO:0009925	30	0.829	1	0.917	1	0.615	1	0.996	1	0.98	1	0.516	1	0.633	1	0.994	1	basal plasma membrane	C
GO:0009948	12	0.854	1	0.349	1	0.978	1	0.418	1	0.363	1	0.371	1	0.934	1	0.258	1	anterior/posterior axis specification	P
GO:0009952	138	1	1	1	1	1	1	1	1	1	1	1	1	1	1	0.999	1	anterior/posterior pattern formation	P
GO:0009953	50	0.989	1	0.992	1	1	1	1	1	0.907	1	0.976	1	0.913	1	0.685	1	dorsal/ventral pattern formation	P
GO:0009954	24	1	1	1	1	1	1	1	1	1	1	1	1	0.998	1	0.885	1	proximal/distal pattern formation	P
GO:0009966	510	0.988	1	0.997	1	0.995	1	0.976	1	0.997	1	0.998	1	0.664	1	0.866	1	regulation of signal transduction	P
GO:0009967	159	0.856	1	0.515	1	0.848	1	0.18	1	0.994	1	0.836	1	0.404	1	0.435	1	positive regulation of signal transduction	P
GO:0009968	125	0.837	1	0.961	1	0.823	1	0.957	1	0.823	1	0.95	1	0.413	1	0.719	1	negative regulation of signal transduction	P
GO:0009975	24	0.826	1	0.821	1	0.895	1	0.553	1	0.884	1	0.888	1	0.4	1	0.684	1	cyclase activity	F
GO:0009982	35	0.202	1	0.125	1	0.19	1	0.285	1	0.582	1	0.118	1	0.232	1	0.308	1	pseudouridine synthase activity	F
GO:0009986	276	0.999	1	0.975	1	0.998	1	1	1	0.997	1	0.994	1	0.682	1	0.21	1	cell surface	C
GO:0009987	12239	2.02e-20	0	5.46e-42	0	6.6e-09	0	1.53e-25	0	1.55e-12	0	5.8e-19	0	2.22e-06	0.002	4.71e-15	0	cellular process	P
GO:0009991	77	0.0192	0.983	0.476	1	0.0229	1	0.329	1	0.262	1	0.514	1	0.065	1	0.42	1	response to extracellular stimulus	P
GO:0009994	13	0.284	1	0.0703	1	0.1	1	0.121	1	0.673	1	0.208	1	0.419	1	0.0585	1	oocyte differentiation	P
GO:0010001	42	0.993	1	0.997	1	0.932	1	0.999	1	0.969	1	0.96	1	1	1	0.998	1	glial cell differentiation	P
GO:0010008	90	0.0503	1	0.00132	0.075	0.27	1	0.00212	0.045	0.359	1	0.128	1	0.0832	1	0.00797	0.448	endosome membrane	C
GO:0010033	79	0.27	1	0.977	1	0.461	1	0.991	1	0.355	1	0.998	1	0.239	1	0.509	1	response to organic substance	P
GO:0010035	54	0.728	1	0.699	1	0.863	1	0.979	1	0.802	1	0.525	1	0.405	1	0.137	1	response to inorganic substance	P
GO:0010038	48	0.744	1	0.752	1	0.895	1	0.974	1	0.746	1	0.621	1	0.341	1	0.167	1	response to metal ion	P
GO:0010092	14	0.994	1	0.938	1	1	1	0.876	1	0.884	1	0.802	1	0.926	1	0.978	1	specification of organ identity	P
GO:0010165	14	0.00545	0.348	0.0612	1	0.0429	1	0.0899	1	0.0348	1	0.0975	1	0.19	1	0.115	1	response to X-ray	P
GO:0010181	12	0.124	1	0.328	1	0.326	1	0.687	1	0.757	1	0.424	1	0.0492	1	0.188	1	FMN binding	F
GO:0010212	13	0.0112	0.983	0.0227	1	0.0353	1	0.0601	1	0.145	1	0.0229	1	0.0401	0.834	0.0399	1	response to ionizing radiation	P
GO:0012501	767	0.00628	0.364	0.0459	1	0.048	1	0.0461	1	0.016	0.719	0.231	1	0.075	1	0.12	1	programmed cell death	P
GO:0012502	185	0.00829	0.618	0.0243	1	0.0949	1	0.0284	1	0.0813	1	0.122	1	0.00265	0.0554	0.0916	1	induction of programmed cell death	P
GO:0012505	995	1.36e-08	0.000973	4.55e-12	0	0.000253	0.0161	1.53e-09	0	1.42e-05	0.00156	2.45e-05	0.002	3.25e-05	0.002	3.27e-07	0.00194	endomembrane system	C
GO:0012506	116	0.0065	0.364	0.0237	1	0.0446	1	0.0496	1	0.0503	1	0.0748	1	0.0261	0.606	0.104	1	vesicle membrane	C
GO:0012510	11	0.0489	1	0.184	1	0.342	1	0.0384	1	0.0785	1	0.318	1	0.0102	0.217	0.341	1	trans-Golgi network transport vesicle membrane	C
GO:0014003	11	0.442	1	0.437	1	0.179	1	0.485	1	0.495	1	0.383	1	0.868	1	0.457	1	oligodendrocyte development	P
GO:0014013	12	1	1	1	1	1	1	1	1	1	1	1	1	1	1	1	1	regulation of gliogenesis	P
GO:0014020	35	0.816	1	0.337	1	0.631	1	0.268	1	0.521	1	0.447	1	0.999	1	0.508	1	primary neural tube formation	P
GO:0014031	40	0.994	1	0.673	1	0.99	1	0.219	1	0.996	1	1	1	0.995	1	1	1	mesenchymal cell development	P
GO:0014032	29	0.999	1	1	1	0.992	1	1	1	1	1	1	1	0.997	1	1	1	neural crest cell development	P
GO:0014033	29	0.999	1	1	1	0.992	1	1	1	1	1	1	1	0.997	1	1	1	neural crest cell differentiation	P
GO:0014069	22	0.938	1	0.998	1	1	1	0.999	1	0.819	1	1	1	0.337	1	0.761	1	postsynaptic density	C
GO:0015002	25	0.154	1	0.0774	1	0.0586	1	0.332	1	0.131	1	0.0833	1	0.786	1	0.177	1	heme-copper terminal oxidase activity	F
GO:0015020	16	0.999	1	0.998	1	0.929	1	0.9	1	1	1	1	1	0.924	1	0.999	1	glucuronosyltransferase activity	F
GO:0015031	796	9.81e-16	0	1.13e-26	0	6.45e-11	0	1.09e-18	0	4.56e-11	0	5.43e-15	0	6.41e-05	0.002	2.94e-10	0	protein transport	P
GO:0015035	11	0.668	1	0.681	1	0.558	1	0.816	1	0.453	1	0.984	1	0.927	1	0.168	1	protein disulfide oxidoreductase activity	F
GO:0015036	17	0.168	1	0.208	1	0.174	1	0.465	1	0.0967	1	0.423	1	0.585	1	0.14	1	disulfide oxidoreductase activity	F
GO:0015057	33	0.537	1	0.849	1	0.138	1	0.961	1	0.571	1	0.98	1	0.994	1	0.241	1	thrombin receptor activity	F
GO:0015075	839	0.133	1	0.977	1	0.974	1	0.997	1	0.446	1	0.997	1	0.000963	0.024	0.343	1	ion transporter activity	F
GO:0015077	124	0.0734	1	0.0408	1	0.457	1	0.34	1	0.0537	1	0.0402	1	0.314	1	0.145	1	monovalent inorganic cation transporter activity	F
GO:0015078	119	0.0928	1	0.0426	1	0.47	1	0.374	1	0.0578	1	0.0405	1	0.384	1	0.146	1	hydrogen ion transporter activity	F
GO:0015082	38	0.365	1	0.125	1	0.532	1	0.0507	1	0.103	1	0.674	1	0.873	1	0.28	1	di-, tri-valent inorganic cation transporter activity	F
GO:0015103	39	0.465	1	0.766	1	0.726	1	0.81	1	0.821	1	0.636	1	0.508	1	0.78	1	inorganic anion transporter activity	F
GO:0015106	22	0.399	1	0.55	1	0.43	1	0.623	1	0.854	1	0.42	1	0.229	1	0.536	1	bicarbonate transporter activity	F
GO:0015108	23	0.392	1	0.644	1	0.464	1	0.69	1	0.831	1	0.46	1	0.207	1	0.691	1	chloride transporter activity	F
GO:0015116	11	0.201	1	0.979	1	0.281	1	0.97	1	0.105	1	0.879	1	0.336	1	0.994	1	sulfate transporter activity	F
GO:0015144	47	0.1	1	0.632	1	0.466	1	0.892	1	0.197	1	0.668	1	0.0304	0.753	0.517	1	carbohydrate transporter activity	F
GO:0015145	14	0.188	1	0.946	1	0.637	1	0.995	1	0.27	1	0.911	1	0.138	1	0.956	1	monosaccharide transporter activity	F
GO:0015149	13	0.111	1	0.9	1	0.485	1	0.987	1	0.197	1	0.856	1	0.096	1	0.923	1	hexose transporter activity	F
GO:0015171	54	0.937	1	0.82	1	0.997	1	0.905	1	0.992	1	0.731	1	0.519	1	0.536	1	amino acid transporter activity	F
GO:0015172	10	0.998	1	0.997	1	0.99	1	0.991	1	0.991	1	0.987	1	0.901	1	0.909	1	acidic amino acid transporter activity	F
GO:0015175	12	0.357	1	0.372	1	0.749	1	0.551	1	0.542	1	0.673	1	0.143	1	0.167	1	neutral amino acid transporter activity	F
GO:0015179	30	0.995	1	0.941	1	1	1	0.985	1	0.994	1	0.903	1	0.67	1	0.295	1	L-amino acid transporter activity	F
GO:0015197	13	0.0824	1	0.366	1	0.388	1	0.652	1	0.243	1	0.146	1	0.0249	0.56	0.584	1	peptide transporter activity	F
GO:0015198	10	0.115	1	0.435	1	0.816	1	0.821	1	0.284	1	0.196	1	0.0171	0.471	0.365	1	oligopeptide transporter activity	F
GO:0015203	19	0.986	1	0.97	1	1	1	0.988	1	1	1	0.906	1	0.265	1	0.467	1	polyamine transporter activity	F
GO:0015232	15	0.908	1	0.574	1	0.968	1	0.542	1	0.548	1	0.812	1	0.853	1	0.361	1	heme transporter activity	F
GO:0015238	30	0.48	1	0.583	1	0.991	1	0.913	1	0.53	1	0.529	1	0.101	1	0.272	1	drug transporter activity	F
GO:0015247	16	0.831	1	0.867	1	0.974	1	0.963	1	0.886	1	0.898	1	0.223	1	0.763	1	aminophospholipid transporter activity	F
GO:0015250	10	0.677	1	0.568	1	0.703	1	0.266	1	0.795	1	0.759	1	0.425	1	0.591	1	water channel activity	F
GO:0015267	441	0.341	1	1	1	0.993	1	0.999	1	0.695	1	1	1	0.00227	0.0554	0.743	1	channel or pore class transporter activity	F
GO:0015268	441	0.341	1	1	1	0.993	1	0.999	1	0.695	1	1	1	0.00227	0.0554	0.743	1	alpha-type channel activity	F
GO:0015269	12	0.894	1	1	1	1	1	1	1	1	1	0.999	1	0.255	1	0.829	1	calcium-activated potassium channel activity	F
GO:0015276	99	0.499	1	1	1	0.944	1	1	1	0.849	1	1	1	0.00635	0.201	0.983	1	ligand-gated ion channel activity	F
GO:0015290	278	0.437	1	0.975	1	0.83	1	0.999	1	0.85	1	0.981	1	0.0404	0.834	0.319	1	electrochemical potential-driven transporter activity	F
GO:0015291	278	0.437	1	0.975	1	0.83	1	0.999	1	0.85	1	0.981	1	0.0404	0.834	0.319	1	porter activity	F
GO:0015293	167	0.651	1	0.999	1	0.701	1	0.998	1	0.905	1	1	1	0.28	1	0.684	1	symporter activity	F
GO:0015294	106	0.71	1	0.996	1	0.526	1	0.995	1	0.86	1	0.997	1	0.745	1	0.777	1	solute:cation symporter activity	F
GO:0015296	61	0.576	1	0.986	1	0.53	1	0.975	1	0.853	1	0.999	1	0.491	1	0.744	1	anion:cation symporter activity	F
GO:0015297	78	0.376	1	0.65	1	0.788	1	0.81	1	0.517	1	0.636	1	0.119	1	0.28	1	antiporter activity	F
GO:0015298	35	0.371	1	0.344	1	0.967	1	0.588	1	0.262	1	0.403	1	0.139	1	0.209	1	solute:cation antiporter activity	F
GO:0015299	35	0.371	1	0.344	1	0.967	1	0.588	1	0.262	1	0.403	1	0.139	1	0.209	1	solute:hydrogen antiporter activity	F
GO:0015300	36	0.381	1	0.439	1	0.98	1	0.667	1	0.322	1	0.471	1	0.173	1	0.283	1	solute:solute antiporter activity	F
GO:0015301	22	0.399	1	0.55	1	0.43	1	0.623	1	0.854	1	0.42	1	0.229	1	0.536	1	anion:anion antiporter activity	F
GO:0015307	22	0.199	1	0.22	1	0.899	1	0.543	1	0.316	1	0.238	1	0.0677	1	0.177	1	drug:hydrogen antiporter activity	F
GO:0015370	103	0.73	1	0.997	1	0.448	1	0.992	1	0.842	1	0.996	1	0.88	1	0.879	1	solute:sodium symporter activity	F
GO:0015380	21	0.331	1	0.499	1	0.367	1	0.569	1	0.843	1	0.377	1	0.177	1	0.556	1	anion exchanger activity	F
GO:0015385	16	0.848	1	0.905	1	0.974	1	0.775	1	0.425	1	0.97	1	0.786	1	0.878	1	sodium:hydrogen antiporter activity	F
GO:0015399	111	0.318	1	0.0693	1	0.92	1	0.225	1	0.206	1	0.144	1	0.334	1	0.208	1	primary active transporter activity	F
GO:0015405	111	0.318	1	0.0693	1	0.92	1	0.225	1	0.206	1	0.144	1	0.334	1	0.208	1	P-P-bond-hydrolysis-driven transporter activity	F
GO:0015450	19	0.148	1	0.023	1	0.159	1	0.0319	1	0.136	1	0.294	1	0.454	1	0.23	1	protein translocase activity	F
GO:0015457	26	0.697	1	0.992	1	0.958	1	0.999	1	0.18	1	0.99	1	0.792	1	0.69	1	auxiliary transport protein activity	F
GO:0015464	18	0.742	1	0.843	1	0.913	1	0.891	1	0.91	1	0.819	1	0.163	1	0.245	1	acetylcholine receptor activity	F
GO:0015485	11	0.0433	1	0.543	1	0.0244	1	0.33	1	0.0969	1	0.839	1	0.165	1	0.197	1	cholesterol binding	F
GO:0015491	23	0.959	1	0.961	1	0.993	1	0.942	1	0.694	1	0.997	1	0.851	1	0.692	1	cation:cation antiporter activity	F
GO:0015520	22	0.199	1	0.22	1	0.899	1	0.543	1	0.316	1	0.238	1	0.0677	1	0.177	1	tetracycline:hydrogen antiporter activity	F
GO:0015629	280	0.00054	0.052	0.0325	1	0.0434	1	0.138	1	0.0032	0.135	0.179	1	0.000811	0.024	0.0429	1	actin cytoskeleton	C
GO:0015630	408	2.75e-12	0.000662	1.78e-13	0	1.82e-11	0	2.05e-09	0	6.52e-08	0	8.27e-09	0.000771	0.000176	0.00645	2.02e-05	0.00391	microtubule cytoskeleton	C
GO:0015631	74	1.39e-06	0.002	1.91e-07	0.00266	0.000341	0.0161	0.00129	0.044	2.36e-06	0.000765	1.5e-05	0.002	0.00426	0.0775	0.000545	0.021	tubulin binding	F
GO:0015645	15	0.464	1	0.119	1	0.262	1	0.15	1	0.89	1	0.178	1	0.549	1	0.203	1	fatty-acid ligase activity	F
GO:0015662	68	0.498	1	0.529	1	0.984	1	0.781	1	0.593	1	0.374	1	0.149	1	0.71	1	ATPase activity, coupled to transmembrane movement of ions, phosphorylative mechanism	F
GO:0015669	16	1	1	1	1	1	1	1	1	1	1	1	1	1	1	1	1	gas transport	P
GO:0015671	14	1	1	1	1	1	1	1	1	1	1	1	1	1	1	1	1	oxygen transport	P
GO:0015672	438	0.556	1	1	1	0.995	1	0.99	1	0.711	1	1	1	0.0498	1	0.955	1	monovalent inorganic cation transport	P
GO:0015674	224	0.243	1	0.644	1	0.882	1	0.422	1	0.512	1	0.994	1	0.00175	0.0554	0.088	1	di-, tri-valent inorganic cation transport	P
GO:0015698	178	0.999	1	1	1	1	1	1	1	0.88	1	1	1	0.509	1	0.992	1	inorganic anion transport	P
GO:0015711	15	0.199	1	0.826	1	0.217	1	0.498	1	0.604	1	0.971	1	0.134	1	0.45	1	organic anion transport	P
GO:0015749	41	0.797	1	0.974	1	1	1	0.985	1	0.832	1	0.999	1	0.198	1	0.518	1	monosaccharide transport	P
GO:0015758	40	0.794	1	0.969	1	1	1	0.977	1	0.867	1	0.998	1	0.173	1	0.473	1	glucose transport	P
GO:0015800	16	0.929	1	0.823	1	0.927	1	0.854	1	0.921	1	0.701	1	0.943	1	0.828	1	acidic amino acid transport	P
GO:0015804	11	0.885	1	0.622	1	1	1	0.971	1	0.94	1	0.888	1	0.322	1	0.126	1	neutral amino acid transport	P
GO:0015807	15	0.6	1	0.782	1	0.995	1	0.629	1	0.83	1	0.982	1	0.382	1	0.294	1	L-amino acid transport	P
GO:0015813	16	0.929	1	0.823	1	0.927	1	0.854	1	0.921	1	0.701	1	0.943	1	0.828	1	glutamate transport	P
GO:0015833	58	0.443	1	0.613	1	0.822	1	0.893	1	0.161	1	0.39	1	0.463	1	0.343	1	peptide transport	P
GO:0015837	88	0.808	1	0.554	1	0.954	1	0.854	1	0.967	1	0.53	1	0.332	1	0.0976	1	amine transport	P
GO:0015849	133	0.708	1	0.912	1	0.823	1	0.952	1	0.924	1	0.952	1	0.487	1	0.355	1	organic acid transport	P
GO:0015886	15	0.908	1	0.574	1	0.968	1	0.542	1	0.548	1	0.812	1	0.853	1	0.361	1	heme transport	P
GO:0015893	29	0.307	1	0.486	1	0.988	1	0.92	1	0.28	1	0.541	1	0.0598	1	0.104	1	drug transport	P
GO:0015904	22	0.199	1	0.22	1	0.899	1	0.543	1	0.316	1	0.238	1	0.0677	1	0.177	1	tetracycline transport	P
GO:0015914	20	0.488	1	0.909	1	0.861	1	0.949	1	0.948	1	0.989	1	0.124	1	0.479	1	phospholipid transport	P
GO:0015918	16	0.245	1	0.628	1	0.294	1	0.704	1	0.241	1	0.5	1	0.287	1	0.542	1	sterol transport	P
GO:0015923	16	0.131	1	0.0148	1	0.29	1	0.0236	0.769	0.116	1	0.724	1	0.316	1	0.00325	0.216	mannosidase activity	F
GO:0015924	10	0.184	1	0.069	1	0.333	1	0.0873	1	0.243	1	0.645	1	0.283	1	0.000929	0.033	mannosyl-oligosaccharide mannosidase activity	F
GO:0015929	15	0.173	1	0.449	1	0.0294	1	0.396	1	0.916	1	0.723	1	0.373	1	0.158	1	hexosaminidase activity	F
GO:0015931	68	0.000162	0.019	2.76e-07	0.00266	0.000109	0.0161	1.67e-07	0.000957	0.00439	0.135	3.27e-05	0.002	0.371	1	0.318	1	nucleobase, nucleoside, nucleotide and nucleic acid transport	P
GO:0015932	12	0.478	1	0.111	1	0.637	1	0.259	1	0.21	1	0.125	1	0.406	1	0.215	1	nucleobase, nucleoside, nucleotide and nucleic acid transporter activity	F
GO:0015934	30	0.546	1	0.0606	1	0.47	1	0.477	1	0.384	1	0.0465	1	0.971	1	0.242	1	large ribosomal subunit	C
GO:0015935	30	0.137	1	0.0153	1	0.0429	1	0.0403	1	0.774	1	0.13	1	0.579	1	0.0384	1	small ribosomal subunit	C
GO:0015936	11	0.175	1	0.0406	1	0.273	1	0.209	1	0.304	1	0.264	1	0.256	1	0.0629	1	coenzyme A metabolism	P
GO:0015980	175	4.55e-05	0.006	0.107	1	0.0112	0.474	0.296	1	0.00113	0.044	0.054	1	0.000514	0.0189	0.237	1	energy derivation by oxidation of organic compounds	P
GO:0015985	27	0.887	1	0.82	1	1	1	0.997	1	0.366	1	0.843	1	0.948	1	0.544	1	energy coupled proton transport, down electrochemical gradient	P
GO:0015986	27	0.887	1	0.82	1	1	1	0.997	1	0.366	1	0.843	1	0.948	1	0.544	1	ATP synthesis coupled proton transport	P
GO:0015988	10	0.372	1	0.198	1	0.922	1	0.321	1	0.167	1	0.0674	1	0.698	1	0.37	1	energy coupled proton transport, against electrochemical gradient	P
GO:0015992	70	0.307	1	0.137	1	0.981	1	0.298	1	0.231	1	0.145	1	0.164	1	0.296	1	proton transport	P
GO:0016010	13	0.753	1	0.775	1	0.988	1	0.763	1	0.424	1	0.747	1	0.373	1	0.706	1	dystrophin-associated glycoprotein complex	C
GO:0016020	6607	0.0208	1	0.148	1	0.973	1	0.793	1	0.343	1	0.971	1	2.24e-08	0.000633	1.39e-09	0	membrane	C
GO:0016021	4783	0.694	1	0.988	1	1	1	1	1	0.915	1	1	1	8.56e-05	0.002	0.00126	0.044	integral to membrane	C
GO:0016023	349	0.000854	0.093	0.00786	0.559	0.0241	1	0.0432	1	0.0197	0.719	0.0298	1	0.0129	0.439	0.0266	1	cytoplasmic membrane-bound vesicle	C
GO:0016032	30	0.364	1	0.82	1	0.899	1	0.778	1	0.194	1	0.916	1	0.231	1	0.346	1	viral life cycle	P
GO:0016042	114	0.0071	0.364	0.0999	1	0.00675	0.283	0.385	1	0.388	1	0.426	1	0.00651	0.201	0.00443	0.258	lipid catabolism	P
GO:0016043	2082	2.93e-21	0	1.69e-27	0	4.15e-14	0	4.31e-23	0	1.73e-13	0	4.12e-13	0	3.18e-07	0.000633	1.8e-08	0	cell organization and biogenesis	P
GO:0016044	87	0.00265	0.139	0.143	1	0.0168	0.81	0.0503	1	0.0323	1	0.348	1	0.0669	1	0.441	1	membrane organization and biogenesis	P
GO:0016049	147	0.313	1	0.832	1	0.503	1	0.495	1	0.955	1	0.995	1	0.0222	0.56	0.535	1	cell growth	P
GO:0016051	118	0.0212	1	0.301	1	0.436	1	0.584	1	0.0743	1	0.272	1	0.00519	0.094	0.134	1	carbohydrate biosynthesis	P
GO:0016052	92	0.0323	1	0.247	1	0.132	1	0.404	1	0.281	1	0.17	1	0.04	0.834	0.415	1	carbohydrate catabolism	P
GO:0016053	93	0.417	1	0.572	1	0.928	1	0.901	1	0.284	1	0.543	1	0.139	1	0.0864	1	organic acid biosynthesis	P
GO:0016055	122	0.909	1	0.822	1	0.911	1	0.683	1	0.934	1	0.883	1	0.73	1	0.727	1	Wnt receptor signaling pathway	P
GO:0016064	118	0.781	1	0.887	1	0.85	1	0.854	1	0.967	1	0.737	1	0.415	1	0.933	1	immunoglobulin mediated immune response	P
GO:0016068	49	0.998	1	0.97	1	0.988	1	0.886	1	0.993	1	0.816	1	0.979	1	1	1	type I hypersensitivity	P
GO:0016070	516	3.03e-12	0.000662	3.52e-28	0	5.11e-10	0	5.56e-23	0	3.61e-08	0	3.92e-17	0	0.0623	1	0.000257	0.017	RNA metabolism	P
GO:0016071	271	7.75e-08	0.000973	2.45e-16	0	9.92e-07	0.000988	6.36e-15	0	0.000285	0.008	7.51e-11	0	0.218	1	0.0462	1	mRNA metabolism	P
GO:0016072	68	0.00274	0.139	0.00249	0.187	0.0698	1	0.000189	0.011	0.0066	0.165	0.0811	1	0.124	1	0.739	1	rRNA metabolism	P
GO:0016073	12	0.328	1	0.002	0.162	0.389	1	0.00339	0.142	0.386	1	0.234	1	0.392	1	0.169	1	snRNA metabolism	P
GO:0016079	15	0.084	1	0.651	1	0.173	1	0.443	1	0.219	1	0.981	1	0.192	1	0.307	1	synaptic vesicle exocytosis	P
GO:0016089	48	0.264	1	0.536	1	0.257	1	0.606	1	0.508	1	0.422	1	0.218	1	0.646	1	aromatic amino acid family biosynthesis, shikimate pathway	P
GO:0016125	82	0.35	1	0.509	1	0.501	1	0.859	1	0.477	1	0.327	1	0.258	1	0.484	1	sterol metabolism	P
GO:0016126	35	0.338	1	0.212	1	0.439	1	0.383	1	0.426	1	0.11	1	0.34	1	0.737	1	sterol biosynthesis	P
GO:0016180	12	0.328	1	0.002	0.162	0.389	1	0.00339	0.142	0.386	1	0.234	1	0.392	1	0.169	1	snRNA processing	P
GO:0016192	499	5.47e-09	0.000973	3.43e-07	0.00266	0.000635	0.03	4.03e-05	0.00541	0.000102	0.006	0.00237	0.143	6.11e-07	0.000879	1.31e-05	0.00391	vesicle-mediated transport	P
GO:0016197	33	0.18	1	0.0355	1	0.366	1	0.173	1	0.0801	1	0.0724	1	0.268	1	0.04	1	endosome transport	P
GO:0016202	15	0.357	1	0.615	1	0.322	1	0.667	1	0.452	1	0.671	1	0.463	1	0.538	1	regulation of striated muscle development	P
GO:0016208	24	0.988	1	0.502	1	1	1	0.844	1	0.694	1	0.452	1	0.852	1	0.168	1	AMP binding	F
GO:0016209	59	0.141	1	0.0671	1	0.958	1	0.241	1	0.291	1	0.157	1	0.0249	0.56	0.18	1	antioxidant activity	F
GO:0016229	36	0.693	1	0.854	1	0.729	1	0.989	1	0.513	1	0.633	1	0.643	1	0.567	1	steroid dehydrogenase activity	F
GO:0016234	10	0.171	1	0.205	1	0.157	1	0.183	1	0.103	1	0.388	1	0.728	1	0.0753	1	inclusion body	C
GO:0016236	18	0.0546	1	0.00474	0.382	0.0912	1	0.064	1	0.246	1	0.278	1	0.0487	1	0.0238	1	macroautophagy	P
GO:0016247	25	0.663	1	0.991	1	0.945	1	0.998	1	0.16	1	0.988	1	0.797	1	0.78	1	channel regulator activity	F
GO:0016251	19	0.0354	1	0.000558	0.073	0.00508	0.188	4.8e-05	0.00541	0.131	1	0.0658	1	0.235	1	0.123	1	general RNA polymerase II transcription factor activity	F
GO:0016265	799	0.0049	0.348	0.0502	1	0.0467	1	0.0526	1	0.0306	1	0.221	1	0.0413	0.834	0.116	1	death	P
GO:0016272	10	0.151	1	1.15e-05	0.007	0.94	1	0.00687	0.378	0.024	1	0.328	1	0.227	1	0.00118	0.044	prefoldin complex	C
GO:0016278	24	0.00088	0.093	8.22e-06	0.003	0.000418	0.0161	0.00045	0.013	0.012	0.421	1.73e-05	0.002	0.355	1	0.00915	0.448	lysine N-methyltransferase activity	F
GO:0016279	24	0.00088	0.093	8.22e-06	0.003	0.000418	0.0161	0.00045	0.013	0.012	0.421	1.73e-05	0.002	0.355	1	0.00915	0.448	protein-lysine N-methyltransferase activity	F
GO:0016284	12	0.582	1	0.55	1	0.365	1	0.412	1	0.68	1	0.443	1	0.766	1	0.934	1	alanine aminopeptidase activity	F
GO:0016289	21	0.848	1	0.228	1	0.509	1	0.749	1	0.793	1	0.227	1	0.631	1	0.0434	1	CoA hydrolase activity	F
GO:0016290	15	0.505	1	0.174	1	0.291	1	0.383	1	0.674	1	0.17	1	0.349	1	0.0975	1	palmitoyl-CoA hydrolase activity	F
GO:0016298	79	0.128	1	0.446	1	0.0408	1	0.638	1	0.983	1	0.602	1	0.037	0.783	0.0909	1	lipase activity	F
GO:0016301	963	1.21e-05	0.005	5.18e-07	0.00266	0.000189	0.0161	0.000582	0.027	0.00191	0.054	7.78e-06	0.002	0.00677	0.201	0.00125	0.044	kinase activity	F
GO:0016303	11	0.14	1	0.172	1	0.309	1	0.387	1	0.246	1	0.115	1	0.174	1	0.13	1	phosphatidylinositol 3-kinase activity	F
GO:0016310	828	0.0305	1	0.000541	0.073	0.377	1	0.0652	1	0.104	1	0.00364	0.143	0.0124	0.439	0.0013	0.044	phosphorylation	P
GO:0016311	148	0.0421	1	0.0063	0.559	0.198	1	0.0384	1	0.0718	1	0.149	1	0.0284	0.606	0.00211	0.063	dephosphorylation	P
GO:0016323	139	0.508	1	0.968	1	0.503	1	0.917	1	0.816	1	0.905	1	0.145	1	0.957	1	basolateral plasma membrane	C
GO:0016324	104	0.636	1	1	1	0.843	1	0.996	1	0.689	1	0.998	1	0.415	1	0.98	1	apical plasma membrane	C
GO:0016327	110	0.679	1	0.292	1	0.698	1	0.228	1	0.984	1	0.917	1	0.0472	1	0.0835	1	apicolateral plasma membrane	C
GO:0016331	68	0.996	1	0.629	1	0.991	1	0.622	1	0.987	1	0.657	1	0.99	1	0.68	1	morphogenesis of embryonic epithelium	P
GO:0016337	192	0.995	1	1	1	0.988	1	1	1	1	1	1	1	0.506	1	0.994	1	cell-cell adhesion	P
GO:0016338	15	0.61	1	1	1	0.634	1	0.999	1	0.993	1	1	1	0.152	1	0.703	1	calcium-independent cell-cell adhesion	P
GO:0016339	11	0.915	1	0.999	1	0.987	1	0.949	1	0.91	1	1	1	0.357	1	0.705	1	calcium-dependent cell-cell adhesion	P
GO:0016358	41	0.178	1	0.761	1	0.208	1	0.49	1	0.175	1	0.91	1	0.265	1	0.726	1	dendrite development	P
GO:0016363	39	0.00507	0.348	0.000937	0.073	0.00439	0.188	0.000789	0.027	0.164	1	0.0154	1	0.163	1	0.0449	1	nuclear matrix	C
GO:0016407	64	0.145	1	0.0328	1	0.0659	1	0.0237	0.769	0.252	1	0.194	1	0.654	1	0.172	1	acetyltransferase activity	F
GO:0016408	13	0.188	1	0.0392	1	0.172	1	0.0906	1	0.182	1	0.0232	1	0.429	1	0.118	1	C-acyltransferase activity	F
GO:0016409	16	0.336	1	0.397	1	0.171	1	0.187	1	0.788	1	0.657	1	0.624	1	0.372	1	palmitoyltransferase activity	F
GO:0016410	65	0.199	1	0.0154	1	0.159	1	0.0178	0.769	0.466	1	0.229	1	0.562	1	0.0633	1	N-acyltransferase activity	F
GO:0016411	14	0.2	1	0.69	1	0.605	1	0.141	1	0.371	1	0.942	1	0.147	1	0.837	1	acylglycerol O-acyltransferase activity	F
GO:0016439	29	0.318	1	0.538	1	0.314	1	0.581	1	0.577	1	0.396	1	0.269	1	0.561	1	tRNA-pseudouridine synthase activity	F
GO:0016444	28	0.00904	0.983	0.0212	1	0.0445	1	0.0588	1	0.155	1	0.256	1	0.0154	0.439	0.00295	0.216	somatic cell DNA recombination	P
GO:0016445	30	0.0177	0.983	0.0233	1	0.0396	1	0.0616	1	0.224	1	0.244	1	0.0338	0.753	0.0057	0.258	somatic diversification of immunoglobulins	P
GO:0016447	28	0.00904	0.983	0.0212	1	0.0445	1	0.0588	1	0.155	1	0.256	1	0.0154	0.439	0.00295	0.216	somatic recombination of immunoglobulin gene segments	P
GO:0016458	33	0.0929	1	0.000857	0.073	0.157	1	0.0436	1	0.0777	1	0.00903	0.355	0.288	1	0.00374	0.216	gene silencing	P
GO:0016459	57	0.106	1	0.923	1	0.353	1	0.99	1	0.481	1	0.96	1	0.00862	0.217	0.268	1	myosin complex	C
GO:0016462	730	1.51e-07	0.000973	5.99e-10	0.00266	0.000299	0.0161	3.88e-06	0.001	9.87e-08	0	2.17e-08	0.000771	0.00401	0.0775	8.99e-05	0.00391	pyrophosphatase activity	F
GO:0016469	58	0.495	1	0.279	1	0.975	1	0.666	1	0.14	1	0.163	1	0.756	1	0.433	1	proton-transporting two-sector ATPase complex	C
GO:0016477	350	1	1	1	1	1	1	1	1	1	1	1	1	0.908	1	0.926	1	cell migration	P
GO:0016481	315	0.377	1	0.038	1	0.486	1	0.0218	0.769	0.576	1	0.168	1	0.319	1	0.213	1	negative regulation of transcription	P
GO:0016485	108	0.461	1	0.21	1	0.526	1	0.316	1	0.457	1	0.385	1	0.461	1	0.088	1	protein processing	P
GO:0016491	919	0.00327	0.186	0.00275	0.187	0.257	1	0.121	1	0.00529	0.165	0.00536	0.202	0.00214	0.0554	0.0145	0.94	oxidoreductase activity	F
GO:0016493	34	0.21	1	0.411	1	0.637	1	0.688	1	0.208	1	0.868	1	0.194	1	0.0431	1	C-C chemokine receptor activity	F
GO:0016494	28	0.258	1	0.312	1	0.752	1	0.717	1	0.0692	1	0.722	1	0.379	1	0.0258	1	C-X-C chemokine receptor activity	F
GO:0016500	25	1	1	0.999	1	1	1	1	1	0.999	1	0.902	1	0.976	1	0.881	1	protein-hormone receptor activity	F
GO:0016502	109	0.991	1	0.999	1	0.998	1	1	1	0.794	1	1	1	0.866	1	0.267	1	nucleotide receptor activity	F
GO:0016503	27	1	1	0.532	1	1	1	1	1	0.89	1	0.0959	1	1	1	0.551	1	pheromone receptor activity	F
GO:0016504	15	0.254	1	0.103	1	0.267	1	0.174	1	0.126	1	0.0435	1	0.638	1	0.386	1	protease activator activity	F
GO:0016525	20	0.895	1	1	1	0.571	1	0.97	1	0.954	1	0.994	1	0.654	1	1	1	negative regulation of angiogenesis	P
GO:0016528	30	0.282	1	0.132	1	0.421	1	0.209	1	0.859	1	0.167	1	0.0804	1	0.119	1	sarcoplasm	C
GO:0016529	27	0.215	1	0.0876	1	0.541	1	0.126	1	0.746	1	0.133	1	0.0411	0.834	0.0957	1	sarcoplasmic reticulum	C
GO:0016538	10	0.271	1	0.432	1	0.244	1	0.414	1	0.855	1	0.373	1	0.952	1	0.974	1	cyclin-dependent protein kinase regulator activity	F
GO:0016540	65	0.22	1	0.132	1	0.196	1	0.256	1	0.316	1	0.193	1	0.399	1	0.102	1	protein autoprocessing	P
GO:0016563	240	0.0101	0.983	0.0384	1	0.00266	0.118	0.0136	0.378	0.08	1	0.575	1	0.221	1	0.0634	1	transcriptional activator activity	F
GO:0016564	181	0.429	1	0.172	1	0.45	1	0.0584	1	0.504	1	0.544	1	0.534	1	0.478	1	transcriptional repressor activity	F
GO:0016566	16	0.884	1	0.954	1	0.987	1	0.999	1	0.53	1	0.921	1	0.716	1	0.723	1	specific transcriptional repressor activity	F
GO:0016567	97	0.00109	0.093	0.00209	0.162	0.00171	0.118	0.00157	0.044	0.00043	0.019	0.0161	1	0.161	1	0.0925	1	protein ubiquitination	P
GO:0016568	185	3.02e-08	0.000973	1.04e-16	0	4.35e-08	0	2.29e-09	0	6.91e-07	0.000765	2.45e-13	0	0.119	1	1.27e-07	0	chromatin modification	P
GO:0016569	54	0.0069	0.364	0.000583	0.073	0.00411	0.188	0.00162	0.044	0.0128	0.481	0.000739	0.0206	0.405	1	0.081	1	covalent chromatin modification	P
GO:0016570	50	0.0177	0.983	0.00397	0.382	0.00875	0.469	0.00625	0.378	0.0314	1	0.00583	0.202	0.453	1	0.195	1	histone modification	P
GO:0016571	18	0.0387	1	0.00291	0.187	0.0192	0.81	0.011	0.378	0.112	1	0.00139	0.051	0.36	1	0.255	1	histone methylation	P
GO:0016573	12	0.219	1	0.113	1	0.208	1	0.14	1	0.259	1	0.105	1	0.548	1	0.104	1	histone acetylation	P
GO:0016575	11	0.0569	1	0.0904	1	0.166	1	0.0693	1	0.0131	0.481	0.183	1	0.71	1	0.499	1	histone deacetylation	P
GO:0016579	11	0.915	1	0.624	1	0.883	1	0.245	1	0.706	1	0.851	1	1	1	0.802	1	protein deubiquitination	P
GO:0016581	11	0.0366	1	0.000906	0.073	0.0789	1	0.000245	0.0115	0.0948	1	0.0139	1	0.498	1	0.0673	1	NuRD complex	C
GO:0016585	24	0.00657	0.364	0.000315	0.042	0.00658	0.283	0.000418	0.013	0.103	1	0.0149	1	0.151	1	0.0327	1	chromatin remodeling complex	C
GO:0016591	74	8.11e-05	0.007	2.49e-06	0.00286	0.000234	0.0161	5.23e-07	0.001	0.0012	0.044	0.00302	0.143	0.307	1	0.272	1	DNA-directed RNA polymerase II, holoenzyme	C
GO:0016597	16	0.833	1	0.994	1	1	1	0.993	1	0.494	1	1	1	0.382	1	0.236	1	amino acid binding	F
GO:0016599	17	0.0482	1	0.0773	1	0.041	1	0.0483	1	0.09	1	0.137	1	0.126	1	0.647	1	caveolar membrane	C
GO:0016601	19	0.0435	1	0.329	1	0.0494	1	0.136	1	0.036	1	0.209	1	0.506	1	0.98	1	Rac protein signal transduction	P
GO:0016604	124	1.15e-08	0.000973	1.89e-12	0	5.25e-06	0.00169	5.53e-09	0	1.34e-05	0.00156	5.5e-08	0.000771	0.00965	0.217	4.9e-05	0.00391	nuclear body	C
GO:0016605	24	0.00043	0.052	1.44e-09	0.00266	0.0165	0.81	4.52e-08	0	0.00383	0.135	0.000214	0.0136	0.0456	0.834	0.00204	0.063	PML body	C
GO:0016607	83	1.93e-05	0.005	3.57e-07	0.00266	1.18e-05	0.00169	1.65e-06	0.001	0.00157	0.048	3.55e-05	0.002	0.0508	1	0.00361	0.216	nuclear speck	C
GO:0016614	147	0.223	1	0.208	1	0.406	1	0.451	1	0.159	1	0.199	1	0.245	1	0.39	1	oxidoreductase activity, acting on CH-OH group of donors	F
GO:0016616	130	0.11	1	0.369	1	0.229	1	0.702	1	0.0846	1	0.254	1	0.16	1	0.588	1	oxidoreductase activity, acting on the CH-OH group of donors, NAD or NADP as acceptor	F
GO:0016620	47	0.993	1	0.602	1	1	1	1	1	0.711	1	0.16	1	0.861	1	0.872	1	oxidoreductase activity, acting on the aldehyde or oxo group of donors, NAD or NADP as acceptor	F
GO:0016627	92	0.00261	0.139	0.0302	1	0.0113	0.474	0.0912	1	0.00302	0.135	0.0297	1	0.0273	0.606	0.292	1	oxidoreductase activity, acting on the CH-CH group of donors	F
GO:0016628	59	0.0637	1	0.225	1	0.0679	1	0.592	1	0.108	1	0.0769	1	0.117	1	0.462	1	oxidoreductase activity, acting on the CH-CH group of donors, NAD or NADP as acceptor	F
GO:0016634	10	0.188	1	0.754	1	0.901	1	0.685	1	0.0171	0.719	0.924	1	0.3	1	0.442	1	oxidoreductase activity, acting on the CH-CH group of donors, oxygen as acceptor	F
GO:0016638	21	0.816	1	0.989	1	0.533	1	0.994	1	0.719	1	0.968	1	0.991	1	0.683	1	oxidoreductase activity, acting on the CH-NH2 group of donors	F
GO:0016641	19	0.935	1	1	1	0.714	1	0.998	1	0.82	1	0.999	1	0.996	1	0.806	1	oxidoreductase activity, acting on the CH-NH2 group of donors, oxygen as acceptor	F
GO:0016645	26	0.0923	1	0.0297	1	0.326	1	0.266	1	0.0308	1	0.0155	1	0.213	1	0.0127	0.94	oxidoreductase activity, acting on the CH-NH group of donors	F
GO:0016646	16	0.244	1	0.207	1	0.392	1	0.497	1	0.0611	1	0.0968	1	0.434	1	0.106	1	oxidoreductase activity, acting on the CH-NH group of donors, NAD or NADP as acceptor	F
GO:0016651	58	0.0271	1	0.00074	0.073	0.106	1	0.00123	0.044	0.311	1	0.0148	1	0.0279	0.606	0.0358	1	oxidoreductase activity, acting on NADH or NADPH	F
GO:0016655	33	0.0278	1	0.00158	0.075	0.0514	1	0.00219	0.045	0.399	1	0.0172	1	0.0608	1	0.0587	1	oxidoreductase activity, acting on NADH or NADPH, quinone or similar compound as acceptor	F
GO:0016667	20	0.127	1	0.169	1	0.179	1	0.414	1	0.114	1	0.113	1	0.534	1	0.17	1	oxidoreductase activity, acting on sulfur group of donors	F
GO:0016675	25	0.154	1	0.0774	1	0.0586	1	0.332	1	0.131	1	0.0833	1	0.786	1	0.177	1	oxidoreductase activity, acting on heme group of donors	F
GO:0016676	25	0.154	1	0.0774	1	0.0586	1	0.332	1	0.131	1	0.0833	1	0.786	1	0.177	1	oxidoreductase activity, acting on heme group of donors, oxygen as acceptor	F
GO:0016679	12	0.0975	1	0.0266	1	0.509	1	0.251	1	0.215	1	0.112	1	0.228	1	0.0844	1	oxidoreductase activity, acting on diphenols and related substances as donors	F
GO:0016681	12	0.0975	1	0.0266	1	0.509	1	0.251	1	0.215	1	0.112	1	0.228	1	0.0844	1	oxidoreductase activity, acting on diphenols and related substances as donors, cytochrome as acceptor	F
GO:0016684	49	0.132	1	0.15	1	0.861	1	0.239	1	0.215	1	0.227	1	0.0502	1	0.209	1	oxidoreductase activity, acting on peroxide as acceptor	F
GO:0016701	61	0.136	1	0.0578	1	0.396	1	0.0557	1	0.0845	1	0.0663	1	0.168	1	0.437	1	oxidoreductase activity, acting on single donors with incorporation of molecular oxygen	F
GO:0016702	60	0.106	1	0.0416	1	0.351	1	0.0433	1	0.0689	1	0.0525	1	0.144	1	0.382	1	oxidoreductase activity, acting on single donors with incorporation of molecular oxygen, incorporation of two atoms of oxygen	F
GO:0016705	168	0.884	1	1	1	1	1	1	1	0.662	1	1	1	0.0434	0.834	0.833	1	oxidoreductase activity, acting on paired donors, with incorporation or reduction of molecular oxygen	F
GO:0016706	25	0.0542	1	0.0912	1	0.195	1	0.137	1	0.294	1	0.0592	1	0.0455	0.834	0.563	1	oxidoreductase activity, acting on paired donors, with incorporation or reduction of molecular oxygen, 2-oxoglutarate as one donor, and incorporation of one atom each of oxygen into both donors	F
GO:0016709	35	0.127	1	0.809	1	0.883	1	0.927	1	0.124	1	0.993	1	0.0101	0.217	0.164	1	oxidoreductase activity, acting on paired donors, with incorporation or reduction of molecular oxygen, NAD or NADH as one donor, and incorporation of one atom of oxygen	F
GO:0016712	71	1	1	1	1	1	1	1	1	0.954	1	1	1	0.604	1	0.967	1	oxidoreductase activity, acting on paired donors, with incorporation or reduction of molecular oxygen, reduced flavin or flavoprotein as one donor, and incorporation of one atom of oxygen	F
GO:0016740	1918	1.69e-13	0.000662	3.85e-18	0	1.88e-09	0	1.33e-10	0	3.91e-08	0	8.05e-13	0	0.00035	0.0189	2.2e-09	0	transferase activity	F
GO:0016741	187	9.71e-07	0.002	1.72e-08	0.00266	1.44e-05	0.00169	0.000141	0.0058	5.34e-06	0.000962	1.46e-07	0.00175	0.503	1	0.000445	0.021	transferase activity, transferring one-carbon groups	F
GO:0016746	205	0.0134	0.983	0.000905	0.073	0.0115	0.474	0.00179	0.044	0.113	1	0.014	1	0.325	1	0.0483	1	transferase activity, transferring acyl groups	F
GO:0016747	189	0.0101	0.983	0.000651	0.073	0.00733	0.283	0.00173	0.044	0.124	1	0.0183	1	0.26	1	0.0373	1	transferase activity, transferring groups other than amino-acyl groups	F
GO:0016755	22	0.817	1	0.539	1	0.812	1	0.327	1	0.612	1	0.28	1	0.927	1	0.998	1	transferase activity, transferring amino-acyl groups	F
GO:0016757	241	0.034	1	0.00642	0.559	0.189	1	0.0678	1	0.0681	1	0.0212	1	0.0427	0.834	0.00379	0.216	transferase activity, transferring glycosyl groups	F
GO:0016758	157	0.191	1	0.303	1	0.317	1	0.536	1	0.184	1	0.184	1	0.35	1	0.174	1	transferase activity, transferring hexosyl groups	F
GO:0016763	47	0.00755	0.618	0.000324	0.042	0.0563	1	0.000764	0.027	0.0305	1	0.00835	0.355	0.028	0.606	0.0108	0.643	transferase activity, transferring pentosyl groups	F
GO:0016765	57	0.501	1	0.94	1	0.917	1	0.817	1	0.57	1	0.811	1	0.454	1	0.973	1	transferase activity, transferring alkyl or aryl (other than methyl) groups	F
GO:0016769	34	0.0835	1	0.0252	1	0.241	1	0.18	1	0.0968	1	0.00904	0.355	0.0634	1	0.103	1	transferase activity, transferring nitrogenous groups	F
GO:0016772	1105	2.05e-08	0.000973	1.88e-11	0.00266	3.78e-07	0.000988	1.92e-07	0.000957	8.72e-05	0.003	2.34e-08	0.000771	0.00336	0.0672	1.77e-05	0.00391	transferase activity, transferring phosphorus-containing groups	F
GO:0016773	815	0.00012	0.019	2.95e-05	0.028	0.00317	0.188	0.0127	0.378	0.00647	0.165	0.000156	0.0136	0.0022	0.0554	0.00197	0.063	phosphotransferase activity, alcohol group as acceptor	F
GO:0016775	34	0.83	1	0.872	1	0.985	1	0.978	1	0.799	1	0.773	1	0.794	1	0.554	1	phosphotransferase activity, nitrogenous group as acceptor	F
GO:0016776	33	0.0101	0.983	0.00249	0.187	0.0217	1	0.0105	0.378	0.00769	0.318	0.00295	0.143	0.14	1	0.0309	1	phosphotransferase activity, phosphate group as acceptor	F
GO:0016779	117	9.66e-05	0.019	1.44e-05	0.007	0.000101	0.0161	6.02e-05	0.0058	0.00548	0.165	0.000221	0.0136	0.206	1	0.00539	0.258	nucleotidyltransferase activity	F
GO:0016780	18	0.193	1	0.0539	1	0.277	1	0.0336	1	0.182	1	0.292	1	0.741	1	0.124	1	phosphotransferase activity, for other substituted phosphate groups	F
GO:0016782	62	0.995	1	0.909	1	0.994	1	0.968	1	0.738	1	0.948	1	0.942	1	0.434	1	transferase activity, transferring sulfur-containing groups	F
GO:0016787	2450	6.48e-12	0.000662	2.18e-12	0	1.45e-06	0.000988	9.64e-06	0.00177	3.39e-06	0.000765	6.67e-08	0.000771	4.98e-09	0	6.36e-11	0	hydrolase activity	F
GO:0016788	672	3.85e-05	0.006	1.78e-05	0.007	0.00432	0.188	0.00485	0.142	0.00785	0.318	0.000219	0.0136	0.000186	0.00645	0.000393	0.021	hydrolase activity, acting on ester bonds	F
GO:0016789	129	0.109	1	0.766	1	0.216	1	0.898	1	0.971	1	0.723	1	0.00558	0.154	0.199	1	carboxylic ester hydrolase activity	F
GO:0016790	95	0.0686	1	0.000178	0.028	0.0507	1	0.00329	0.142	0.0142	0.481	0.00439	0.152	0.816	1	0.000422	0.021	thiolester hydrolase activity	F
GO:0016791	251	0.00259	0.139	0.000181	0.028	0.108	1	0.0157	0.769	0.0192	0.719	0.00887	0.355	0.00249	0.0554	0.000134	0.004	phosphoric monoester hydrolase activity	F
GO:0016796	20	0.113	1	0.289	1	0.135	1	0.505	1	0.356	1	0.272	1	0.195	1	0.251	1	exonuclease activity, active with either ribo- or deoxyribonucleic acids and producing 5'-phosphomonoesters	F
GO:0016798	139	0.0366	1	0.274	1	0.00816	0.343	0.292	1	0.441	1	0.678	1	0.167	1	0.0301	1	hydrolase activity, acting on glycosyl bonds	F
GO:0016799	19	0.41	1	0.736	1	0.216	1	0.653	1	0.384	1	0.897	1	0.723	1	0.553	1	hydrolase activity, hydrolyzing N-glycosyl compounds	F
GO:0016805	15	0.0875	1	0.0761	1	0.0727	1	0.0945	1	0.123	1	0.124	1	0.352	1	0.971	1	dipeptidase activity	F
GO:0016806	12	0.0517	1	0.193	1	0.0528	1	0.531	1	0.341	1	0.163	1	0.0554	1	0.329	1	dipeptidyl-peptidase and tripeptidyl-peptidase activity	F
GO:0016810	110	0.00281	0.139	0.00427	0.382	0.0224	1	0.0358	1	0.0339	1	0.0779	1	0.0122	0.439	0.00141	0.044	hydrolase activity, acting on carbon-nitrogen (but not peptide) bonds	F
GO:0016811	53	0.00913	0.983	0.00716	0.559	0.0357	1	0.0197	0.769	0.0304	1	0.155	1	0.0986	1	0.0257	1	hydrolase activity, acting on carbon-nitrogen (but not peptide) bonds, in linear amides	F
GO:0016813	14	0.19	1	0.442	1	0.209	1	0.91	1	0.245	1	0.232	1	0.227	1	0.267	1	hydrolase activity, acting on carbon-nitrogen (but not peptide) bonds, in linear amidines	F
GO:0016814	25	0.0841	1	0.0436	1	0.17	1	0.123	1	0.182	1	0.219	1	0.0622	1	0.00904	0.448	hydrolase activity, acting on carbon-nitrogen (but not peptide) bonds, in cyclic amidines	F
GO:0016817	736	1.81e-07	0.000973	4.61e-10	0.00266	0.000285	0.0161	5.67e-06	0.00177	1.28e-07	0	1.48e-08	0.000771	0.00456	0.0775	6.77e-05	0.00391	hydrolase activity, acting on acid anhydrides	F
GO:0016818	735	1.81e-07	0.000973	5.26e-10	0.00266	0.000315	0.0161	6.7e-06	0.00177	1.2e-07	0	1.52e-08	0.000771	0.00432	0.0775	7.12e-05	0.00391	hydrolase activity, acting on acid anhydrides, in phosphorus-containing anhydrides	F
GO:0016820	130	0.369	1	0.33	1	0.959	1	0.894	1	0.251	1	0.132	1	0.272	1	0.313	1	hydrolase activity, acting on acid anhydrides, catalyzing transmembrane movement of substances	F
GO:0016829	161	0.0557	1	0.198	1	0.0942	1	0.481	1	0.0395	1	0.164	1	0.193	1	0.142	1	lyase activity	F
GO:0016830	43	0.0628	1	0.0348	1	0.132	1	0.0366	1	0.0382	1	0.0735	1	0.224	1	0.0774	1	carbon-carbon lyase activity	F
GO:0016831	31	0.0485	1	0.0391	1	0.0879	1	0.0447	1	0.0571	1	0.0649	1	0.195	1	0.116	1	carboxy-lyase activity	F
GO:0016835	58	0.238	1	0.502	1	0.149	1	0.883	1	0.168	1	0.242	1	0.728	1	0.592	1	carbon-oxygen lyase activity	F
GO:0016836	48	0.113	1	0.407	1	0.108	1	0.719	1	0.127	1	0.23	1	0.499	1	0.48	1	hydro-lyase activity	F
GO:0016846	15	0.249	1	0.755	1	0.434	1	0.881	1	0.305	1	0.64	1	0.093	1	0.51	1	carbon-sulfur lyase activity	F
GO:0016849	23	0.921	1	1	1	0.981	1	0.787	1	0.956	1	1	1	0.43	1	0.854	1	phosphorus-oxygen lyase activity	F
GO:0016853	179	0.00422	0.186	0.00038	0.043	0.00197	0.118	0.00943	0.378	0.0508	1	0.00104	0.048	0.211	1	0.0352	1	isomerase activity	F
GO:0016854	15	0.135	1	0.269	1	0.109	1	0.329	1	0.153	1	0.263	1	0.276	1	0.149	1	racemase and epimerase activity	F
GO:0016859	34	0.000636	0.052	0.000118	0.028	0.00179	0.118	0.00883	0.378	0.0139	0.481	0.000155	0.0136	0.00972	0.217	0.0283	1	cis-trans isomerase activity	F
GO:0016860	41	0.613	1	0.0524	1	0.282	1	0.0527	1	0.447	1	0.0869	1	0.998	1	0.312	1	intramolecular oxidoreductase activity	F
GO:0016863	14	0.622	1	0.206	1	0.116	1	0.324	1	0.738	1	0.09	1	1	1	0.878	1	intramolecular oxidoreductase activity, transposing C=C bonds	F
GO:0016866	47	0.285	1	0.188	1	0.227	1	0.353	1	0.781	1	0.124	1	0.297	1	0.482	1	intramolecular transferase activity	F
GO:0016868	10	0.541	1	0.43	1	0.496	1	0.492	1	0.783	1	0.317	1	0.632	1	0.811	1	intramolecular transferase activity, phosphotransferases	F
GO:0016874	407	2.05e-08	0.000973	1.79e-14	0	1.2e-07	0.000988	1.77e-12	0	3.18e-08	0	1.08e-11	0	0.0355	0.753	5.23e-06	0.00391	ligase activity	F
GO:0016875	69	0.00174	0.102	0.000206	0.028	0.00463	0.188	0.00019	0.011	0.00578	0.165	0.00496	0.202	0.0855	1	0.112	1	ligase activity, forming carbon-oxygen bonds	F
GO:0016876	69	0.00174	0.102	0.000206	0.028	0.00463	0.188	0.00019	0.011	0.00578	0.165	0.00496	0.202	0.0855	1	0.112	1	ligase activity, forming aminoacyl-tRNA and related compounds	F
GO:0016877	27	0.291	1	0.155	1	0.377	1	0.16	1	0.587	1	0.315	1	0.148	1	0.205	1	ligase activity, forming carbon-sulfur bonds	F
GO:0016878	15	0.248	1	0.307	1	0.468	1	0.224	1	0.325	1	0.504	1	0.0853	1	0.646	1	acid-thiol ligase activity	F
GO:0016879	228	4.85e-06	0.002	6.12e-09	0.00266	1.44e-05	0.00169	7.81e-08	0	1.93e-06	0.000765	4.3e-08	0.000771	0.117	1	9.36e-05	0.004	ligase activity, forming carbon-nitrogen bonds	F
GO:0016881	189	2.28e-06	0.002	4.11e-08	0.00266	6.33e-06	0.00169	2.9e-07	0.001	6.52e-07	0.000765	1.07e-07	0.00175	0.11	1	0.000447	0.021	acid-amino acid ligase activity	F
GO:0016884	11	0.65	1	0.468	1	0.776	1	0.374	1	0.449	1	0.383	1	0.689	1	0.53	1	carbon-nitrogen ligase activity, with glutamine as amido-N-donor	F
GO:0016887	349	5.21e-06	0.002	1.46e-07	0.00266	0.000448	0.0161	7.92e-05	0.0058	0.00017	0.008	2.74e-06	0.002	0.012	0.439	0.00017	0.006	ATPase activity	F
GO:0016891	20	0.0587	1	0.151	1	0.0301	1	0.0179	0.769	0.192	1	0.108	1	0.0952	1	0.997	1	endoribonuclease activity, producing 5'-phosphomonoesters	F
GO:0016892	18	0.936	1	0.97	1	0.503	1	0.993	1	0.996	1	0.928	1	1	1	0.941	1	endoribonuclease activity, producing 3'-phosphomonoesters	F
GO:0016893	26	0.0678	1	0.183	1	0.0847	1	0.0291	1	0.188	1	0.129	1	0.0743	1	0.983	1	endonuclease activity, active with either ribo- or deoxyribonucleic acids and producing 5'-phosphomonoesters	F
GO:0016894	20	0.94	1	0.931	1	0.56	1	0.998	1	0.999	1	0.972	1	0.999	1	0.976	1	endonuclease activity, active with either ribo- or deoxyribonucleic acids and producing 3'-phosphomonoesters	F
GO:0016896	12	0.0913	1	0.0821	1	0.206	1	0.473	1	0.187	1	0.182	1	0.137	1	0.0714	1	exoribonuclease activity, producing 5'-phosphomonoesters	F
GO:0016903	56	0.981	1	0.529	1	0.994	1	0.999	1	0.726	1	0.122	1	0.857	1	0.898	1	oxidoreductase activity, acting on the aldehyde or oxo group of donors	F
GO:0016917	66	1	1	0.998	1	0.994	1	0.989	1	1	1	0.995	1	0.997	1	0.917	1	GABA receptor activity	F
GO:0016918	11	0.606	1	0.693	1	0.554	1	0.291	1	0.581	1	0.724	1	0.591	1	0.618	1	retinal binding	F
GO:0016998	17	0.318	1	0.613	1	0.558	1	0.736	1	0.978	1	0.349	1	0.178	1	0.463	1	cell wall catabolism	P
GO:0017004	15	0.973	1	0.576	1	0.959	1	0.507	1	0.772	1	0.788	1	0.963	1	0.323	1	cytochrome complex assembly	P
GO:0017015	25	0.477	1	0.451	1	0.547	1	0.421	1	0.324	1	0.499	1	0.62	1	0.401	1	regulation of transforming growth factor beta receptor signaling pathway	P
GO:0017016	57	0.0216	1	0.131	1	0.29	1	0.271	1	0.0494	1	0.331	1	0.0136	0.439	0.0793	1	Ras GTPase binding	F
GO:0017017	12	1	1	1	1	1	1	1	1	0.973	1	1	1	1	1	0.958	1	MAP kinase phosphatase activity	F
GO:0017022	17	0.222	1	0.369	1	0.81	1	0.368	1	0.144	1	0.483	1	0.163	1	0.314	1	myosin binding	F
GO:0017038	99	0.00637	0.364	2.42e-06	0.00286	0.0439	1	3.46e-05	0.00541	0.0372	1	0.000464	0.02	0.115	1	0.00413	0.216	protein import	P
GO:0017046	12	1	1	0.996	1	0.999	1	1	1	1	1	0.999	1	0.882	1	0.374	1	peptide hormone binding	F
GO:0017048	24	0.207	1	0.289	1	0.551	1	0.412	1	0.207	1	0.717	1	0.0908	1	0.0952	1	Rho GTPase binding	F
GO:0017053	10	0.46	1	0.265	1	0.836	1	0.166	1	0.258	1	0.314	1	0.785	1	0.762	1	transcriptional repressor complex	C
GO:0017076	1933	4.42e-19	0	3.89e-26	0	6.2e-12	0	2.53e-15	0	8.86e-15	0	1.89e-18	0	6.49e-08	0.000633	5.39e-11	0	purine nucleotide binding	F
GO:0017110	10	0.418	1	0.578	1	0.691	1	0.643	1	0.189	1	0.607	1	0.354	1	0.615	1	nucleoside-diphosphatase activity	F
GO:0017111	701	1.74e-07	0.000973	8.23e-10	0.00266	0.000222	0.0161	3.41e-06	0.001	2.91e-07	0	6.52e-08	0.000771	0.00335	0.0672	9.85e-05	0.004	nucleoside-triphosphatase activity	F
GO:0017124	26	0.182	1	0.673	1	0.319	1	0.236	1	0.637	1	0.908	1	0.0981	1	0.926	1	SH3 domain binding	F
GO:0017137	22	0.102	1	0.152	1	0.763	1	0.21	1	0.073	1	0.148	1	0.0994	1	0.163	1	Rab GTPase binding	F
GO:0017144	11	0.0012	0.093	0.637	1	0.112	1	0.996	1	0.369	1	0.283	1	0.0381	0.783	0.59	1	drug metabolism	P
GO:0017145	10	0.983	1	0.469	1	0.798	1	0.491	1	0.978	1	0.314	1	0.989	1	0.936	1	stem cell division	P
GO:0017148	38	0.0738	1	0.0155	1	0.037	1	0.0545	1	0.214	1	0.144	1	0.289	1	0.00373	0.216	negative regulation of protein biosynthesis	P
GO:0017153	53	0.613	1	0.994	1	0.599	1	0.987	1	0.838	1	0.997	1	0.519	1	0.882	1	sodium:dicarboxylate symporter activity	F
GO:0017156	24	0.516	1	0.696	1	0.841	1	0.916	1	0.447	1	0.668	1	0.261	1	0.348	1	calcium ion-dependent exocytosis	P
GO:0017157	23	0.302	1	0.898	1	0.63	1	0.957	1	0.38	1	0.999	1	0.0964	1	0.296	1	regulation of exocytosis	P
GO:0018024	24	0.00088	0.093	8.22e-06	0.003	0.000418	0.0161	0.00045	0.013	0.012	0.421	1.73e-05	0.002	0.355	1	0.00915	0.448	histone-lysine N-methyltransferase activity	F
GO:0018105	17	0.0276	1	0.0125	0.751	0.0178	0.81	0.0206	0.769	0.164	1	0.0511	1	0.121	1	0.0473	1	peptidyl-serine phosphorylation	P
GO:0018107	10	0.162	1	0.109	1	0.281	1	0.139	1	0.134	1	0.101	1	0.395	1	0.38	1	peptidyl-threonine phosphorylation	P
GO:0018108	74	0.79	1	0.498	1	0.759	1	0.278	1	0.999	1	0.982	1	0.162	1	0.129	1	peptidyl-tyrosine phosphorylation	P
GO:0018149	14	0.914	1	0.99	1	0.688	1	0.978	1	0.992	1	0.875	1	0.98	1	0.996	1	peptide cross-linking	P
GO:0018193	144	0.0253	1	0.00128	0.075	0.044	1	0.00574	0.378	0.371	1	0.129	1	0.0325	0.753	0.000724	0.033	peptidyl-amino acid modification	P
GO:0018195	10	0.0315	1	0.328	1	0.0436	1	0.371	1	0.0759	1	0.417	1	0.0276	0.606	0.274	1	peptidyl-arginine modification	P
GO:0018209	20	0.071	1	0.0297	1	0.0455	1	0.0531	1	0.18	1	0.0632	1	0.24	1	0.0709	1	peptidyl-serine modification	P
GO:0018210	13	0.312	1	0.196	1	0.413	1	0.247	1	0.154	1	0.125	1	0.63	1	0.486	1	peptidyl-threonine modification	P
GO:0018212	74	0.79	1	0.498	1	0.759	1	0.278	1	0.999	1	0.982	1	0.162	1	0.129	1	peptidyl-tyrosine modification	P
GO:0018298	15	0.975	1	0.967	1	1	1	0.789	1	1	1	1	1	0.048	1	0.211	1	protein-chromophore linkage	P
GO:0018342	10	0.769	1	0.446	1	0.822	1	0.47	1	0.612	1	0.631	1	0.75	1	0.195	1	protein prenylation	P
GO:0018958	83	0.614	1	0.955	1	0.619	1	0.86	1	0.941	1	0.967	1	0.499	1	0.884	1	phenol metabolism	P
GO:0019001	375	8.23e-05	0.007	0.000119	0.028	0.000459	0.0161	0.00133	0.044	0.00028	0.008	0.000601	0.02	0.0549	1	0.115	1	guanyl nucleotide binding	F
GO:0019012	15	0.385	1	0.578	1	0.384	1	0.742	1	0.317	1	0.318	1	0.475	1	0.81	1	virion	C
GO:0019028	14	0.406	1	0.536	1	0.46	1	0.71	1	0.318	1	0.286	1	0.465	1	0.762	1	viral capsid	C
GO:0019048	10	0.19	1	0.355	1	0.388	1	0.913	1	0.307	1	0.833	1	0.0244	0.56	0.0925	1	virus-host interaction	P
GO:0019058	17	0.724	1	0.956	1	0.971	1	0.951	1	0.194	1	0.757	1	0.936	1	0.959	1	viral infectious cycle	P
GO:0019098	17	0.994	1	0.999	1	0.981	1	0.997	1	0.875	1	0.994	1	0.893	1	0.989	1	reproductive behavior	P
GO:0019104	10	0.297	1	0.388	1	0.104	1	0.612	1	0.308	1	0.408	1	0.981	1	0.415	1	DNA N-glycosylase activity	F
GO:0019199	124	1	1	1	1	1	1	1	1	0.999	1	1	1	0.799	1	0.781	1	transmembrane receptor protein kinase activity	F
GO:0019200	36	0.108	1	0.0598	1	0.0114	0.474	0.111	1	0.62	1	0.0403	1	0.244	1	0.309	1	carbohydrate kinase activity	F
GO:0019201	17	0.0567	1	0.0266	1	0.134	1	0.0864	1	0.0898	1	0.00914	0.355	0.0926	1	0.104	1	nucleotide kinase activity	F
GO:0019205	41	0.0053	0.348	0.00144	0.075	0.00564	0.188	0.00967	0.378	0.00627	0.165	0.000997	0.048	0.118	1	0.0457	1	nucleobase, nucleoside, nucleotide kinase activity	F
GO:0019207	93	0.247	1	0.279	1	0.45	1	0.138	1	0.419	1	0.65	1	0.36	1	0.581	1	kinase regulator activity	F
GO:0019208	46	0.167	1	0.243	1	0.0971	1	0.272	1	0.377	1	0.429	1	0.575	1	0.182	1	phosphatase regulator activity	F
GO:0019209	16	0.74	1	0.351	1	0.355	1	0.54	1	0.545	1	0.209	1	1	1	0.957	1	kinase activator activity	F
GO:0019210	25	0.365	1	0.762	1	0.374	1	0.106	1	0.593	1	0.997	1	0.269	1	0.954	1	kinase inhibitor activity	F
GO:0019212	20	0.257	1	0.162	1	0.206	1	0.249	1	0.727	1	0.3	1	0.171	1	0.133	1	phosphatase inhibitor activity	F
GO:0019213	21	0.0157	0.983	0.0187	1	0.0257	1	0.0214	0.769	0.0298	1	0.22	1	0.235	1	0.0282	1	deacetylase activity	F
GO:0019216	38	0.187	1	0.717	1	0.533	1	0.813	1	0.203	1	0.891	1	0.16	1	0.216	1	regulation of lipid metabolism	P
GO:0019217	13	0.249	1	0.108	1	0.631	1	0.198	1	0.198	1	0.338	1	0.179	1	0.073	1	regulation of fatty acid metabolism	P
GO:0019218	17	0.677	1	0.999	1	0.649	1	1	1	0.614	1	1	1	0.653	1	0.829	1	regulation of steroid metabolism	P
GO:0019219	2464	0.308	1	2.63e-07	0.00266	0.0824	1	5.39e-10	0	0.136	1	5.91e-05	0.00536	0.966	1	0.542	1	regulation of nucleobase, nucleoside, nucleotide and nucleic acid metabolism	P
GO:0019220	123	0.992	1	0.955	1	0.99	1	0.822	1	1	1	0.999	1	0.715	1	0.499	1	regulation of phosphate metabolism	P
GO:0019221	45	0.926	1	0.871	1	0.969	1	0.622	1	0.918	1	0.969	1	0.463	1	0.688	1	cytokine and chemokine mediated signaling pathway	P
GO:0019222	2865	0.146	1	1.17e-08	0.00266	0.0534	1	6.59e-12	0	0.0888	1	2.91e-05	0.002	0.904	1	0.298	1	regulation of metabolism	P
GO:0019226	286	0.953	1	1	1	0.989	1	0.999	1	0.938	1	1	1	0.462	1	0.793	1	transmission of nerve impulse	P
GO:0019229	15	0.605	1	0.997	1	0.34	1	1	1	0.851	1	0.972	1	0.928	1	0.914	1	regulation of vasoconstriction	P
GO:0019233	29	0.964	1	1	1	0.954	1	1	1	0.999	1	1	1	0.379	1	0.999	1	sensory perception of pain	P
GO:0019239	22	0.284	1	0.216	1	0.698	1	0.392	1	0.281	1	0.343	1	0.131	1	0.0361	1	deaminase activity	F
GO:0019290	47	0.241	1	0.501	1	0.235	1	0.563	1	0.482	1	0.404	1	0.204	1	0.635	1	siderophore biosynthesis	P
GO:0019318	174	0.0464	1	0.166	1	0.225	1	0.63	1	0.108	1	0.104	1	0.0728	1	0.335	1	hexose metabolism	P
GO:0019319	29	0.104	1	0.434	1	0.657	1	0.415	1	0.209	1	0.755	1	0.0446	0.834	0.31	1	hexose biosynthesis	P
GO:0019320	68	0.014	0.983	0.164	1	0.0559	1	0.392	1	0.116	1	0.0544	1	0.0289	0.606	0.51	1	hexose catabolism	P
GO:0019321	11	0.0857	1	0.397	1	0.148	1	0.472	1	0.0592	1	0.263	1	0.508	1	0.456	1	pentose metabolism	P
GO:0019362	26	0.0805	1	0.47	1	0.14	1	0.432	1	0.251	1	0.728	1	0.0943	1	0.545	1	pyridine nucleotide metabolism	P
GO:0019363	12	0.502	1	0.508	1	0.313	1	0.576	1	0.788	1	0.936	1	0.464	1	0.344	1	pyridine nucleotide biosynthesis	P
GO:0019370	17	0.895	1	0.931	1	0.913	1	0.852	1	0.886	1	0.962	1	0.576	1	0.528	1	leukotriene biosynthesis	P
GO:0019395	25	0.000843	0.093	1.74e-06	0.00266	0.00182	0.118	0.000834	0.027	0.00966	0.369	0.00675	0.355	0.0922	1	1.56e-05	0.00391	fatty acid oxidation	P
GO:0019438	58	0.2	1	0.398	1	0.268	1	0.722	1	0.508	1	0.165	1	0.101	1	0.46	1	aromatic compound biosynthesis	P
GO:0019439	15	0.593	1	0.614	1	0.912	1	0.998	1	0.479	1	0.306	1	0.283	1	0.33	1	aromatic compound catabolism	P
GO:0019538	3395	1.13e-12	0.000662	2.28e-29	0	1.49e-09	0	6.27e-18	0	5.38e-08	0	7.3e-17	0	0.00521	0.094	2.59e-13	0	protein metabolism	P
GO:0019540	47	0.241	1	0.501	1	0.235	1	0.563	1	0.482	1	0.404	1	0.204	1	0.635	1	siderophore biosynthesis from catechol	P
GO:0019717	63	0.191	1	0.473	1	0.24	1	0.428	1	0.558	1	0.835	1	0.14	1	0.31	1	synaptosome	C
GO:0019722	33	0.582	1	0.354	1	0.937	1	0.163	1	0.242	1	0.797	1	0.46	1	0.522	1	calcium-mediated signaling	P
GO:0019724	120	0.799	1	0.894	1	0.813	1	0.858	1	0.975	1	0.724	1	0.457	1	0.948	1	B cell mediated immunity	P
GO:0019725	261	0.00286	0.139	0.686	1	0.0981	1	0.354	1	0.0319	1	0.956	1	0.00747	0.201	0.444	1	cell homeostasis	P
GO:0019748	95	0.105	1	0.227	1	0.0966	1	0.372	1	0.187	1	0.243	1	0.145	1	0.315	1	secondary metabolism	P
GO:0019751	34	0.0152	0.983	0.188	1	0.0211	1	0.058	1	0.504	1	0.449	1	0.0392	0.783	0.434	1	polyol metabolism	P
GO:0019752	633	0.00279	0.139	0.00126	0.075	0.0566	1	0.0511	1	0.0324	1	0.00223	0.143	0.00345	0.0672	0.000481	0.021	carboxylic acid metabolism	P
GO:0019783	69	0.0124	0.983	6.37e-05	0.028	0.0488	1	1.8e-05	0.00192	0.00458	0.135	0.0034	0.143	0.348	1	0.0077	0.448	small conjugating protein-specific protease activity	F
GO:0019787	167	4.43e-05	0.006	1.81e-07	0.00266	5.63e-05	0.003	1.84e-06	0.001	3.69e-06	0.000765	2.84e-07	0.00175	0.27	1	0.00101	0.044	small conjugating protein ligase activity	F
GO:0019825	18	1	1	1	1	1	1	1	1	1	1	1	1	1	1	1	1	oxygen binding	F
GO:0019827	16	0.466	1	0.255	1	0.439	1	0.225	1	0.793	1	0.281	1	0.183	1	0.407	1	stem cell maintenance	P
GO:0019829	50	0.719	1	0.226	1	0.997	1	0.661	1	0.294	1	0.241	1	0.916	1	0.214	1	cation-transporting ATPase activity	F
GO:0019835	26	0.539	1	0.856	1	0.369	1	0.94	1	0.988	1	0.732	1	0.467	1	0.814	1	cytolysis	P
GO:0019838	89	1	1	1	1	1	1	1	1	0.99	1	0.998	1	0.999	1	0.968	1	growth factor binding	F
GO:0019840	17	0.877	1	0.925	1	0.826	1	0.494	1	0.92	1	0.795	1	0.631	1	0.898	1	isoprenoid binding	F
GO:0019841	11	0.57	1	0.608	1	0.525	1	0.332	1	0.581	1	0.566	1	0.511	1	0.618	1	retinol binding	F
GO:0019842	149	0.00939	0.983	0.00198	0.162	0.0597	1	0.029	1	0.00291	0.135	0.00122	0.051	0.0458	0.834	0.185	1	vitamin binding	F
GO:0019843	19	0.609	1	0.578	1	0.619	1	0.115	1	0.569	1	0.453	1	0.838	1	1	1	rRNA binding	F
GO:0019861	86	0.106	1	0.941	1	0.794	1	0.7	1	0.0621	1	0.974	1	0.233	1	0.908	1	flagellum	C
GO:0019865	11	0.332	1	0.151	1	0.598	1	0.163	1	0.391	1	0.262	1	0.253	1	0.166	1	immunoglobulin binding	F
GO:0019866	314	5.43e-07	0.002	1.34e-14	0	1.31e-05	0.00169	1.47e-09	0	0.00013	0.008	2.61e-11	0	0.0148	0.439	0.000149	0.004	organelle inner membrane	C
GO:0019867	79	0.000202	0.019	6.19e-05	0.028	0.0237	1	0.000373	0.013	0.000362	0.019	0.00307	0.143	0.0168	0.471	0.00532	0.258	outer membrane	C
GO:0019882	82	1	1	0.452	1	0.998	1	0.31	1	0.958	1	0.132	1	1	1	0.976	1	antigen processing and presentation	P
GO:0019884	23	0.801	1	0.0948	1	0.686	1	0.0596	1	0.238	1	0.267	1	1	1	0.926	1	antigen processing and presentation of exogenous antigen	P
GO:0019886	16	0.941	1	0.276	1	0.966	1	0.242	1	0.333	1	0.468	1	0.999	1	0.842	1	antigen processing and presentation of exogenous peptide antigen via MHC class II	P
GO:0019887	74	0.513	1	0.417	1	0.612	1	0.21	1	0.565	1	0.75	1	0.647	1	0.654	1	protein kinase regulator activity	F
GO:0019888	44	0.157	1	0.24	1	0.0842	1	0.264	1	0.366	1	0.419	1	0.588	1	0.2	1	protein phosphatase regulator activity	F
GO:0019897	59	0.312	1	0.634	1	0.504	1	0.62	1	0.521	1	0.7	1	0.0675	1	0.88	1	extrinsic to plasma membrane	C
GO:0019898	92	0.32	1	0.544	1	0.819	1	0.668	1	0.252	1	0.656	1	0.0302	0.753	0.551	1	extrinsic to membrane	C
GO:0019899	247	0.000255	0.019	0.0181	1	0.0091	0.469	0.0712	1	0.00219	0.135	0.0543	1	0.00477	0.0775	0.0414	1	enzyme binding	F
GO:0019900	94	0.118	1	0.509	1	0.144	1	0.726	1	0.144	1	0.566	1	0.239	1	0.392	1	kinase binding	F
GO:0019901	78	0.0608	1	0.322	1	0.0761	1	0.546	1	0.0691	1	0.389	1	0.19	1	0.28	1	protein kinase binding	F
GO:0019902	16	0.034	1	0.0364	1	0.0903	1	0.262	1	0.179	1	0.0651	1	0.136	1	0.0675	1	phosphatase binding	F
GO:0019903	12	0.2	1	0.0185	1	0.258	1	0.156	1	0.202	1	0.0562	1	0.32	1	0.0759	1	protein phosphatase binding	F
GO:0019904	139	0.0977	1	0.179	1	0.214	1	0.0733	1	0.238	1	0.397	1	0.204	1	0.594	1	protein domain specific binding	F
GO:0019905	25	0.69	1	0.766	1	0.865	1	0.598	1	0.445	1	0.908	1	0.552	1	0.521	1	syntaxin binding	F
GO:0019915	12	0.0601	1	0.225	1	0.0626	1	0.155	1	0.194	1	0.89	1	0.631	1	0.0704	1	sequestering of lipid	P
GO:0019932	155	0.883	1	0.856	1	0.929	1	0.829	1	0.775	1	0.946	1	0.734	1	0.564	1	second-messenger-mediated signaling	P
GO:0019933	64	1	1	1	1	1	1	1	1	0.995	1	1	1	0.93	1	0.742	1	cAMP-mediated signaling	P
GO:0019935	69	0.998	1	0.998	1	1	1	1	1	0.996	1	0.998	1	0.864	1	0.786	1	cyclic-nucleotide-mediated signaling	P
GO:0019941	155	4.98e-06	0.002	7.32e-11	0.00266	5.26e-05	0.003	6.34e-08	0	2.47e-06	0.000765	1.72e-07	0.00175	0.281	1	0.000102	0.004	modification-dependent protein catabolism	P
GO:0019953	434	1	1	0.996	1	0.987	1	0.65	1	0.992	1	0.999	1	1	1	1	1	sexual reproduction	P
GO:0019955	105	0.866	1	0.971	1	0.937	1	0.992	1	0.838	1	1	1	0.344	1	0.0995	1	cytokine binding	F
GO:0019956	44	0.289	1	0.429	1	0.699	1	0.715	1	0.291	1	0.936	1	0.174	1	0.0252	1	chemokine binding	F
GO:0019957	34	0.21	1	0.411	1	0.637	1	0.688	1	0.208	1	0.868	1	0.194	1	0.0431	1	C-C chemokine binding	F
GO:0019958	29	0.3	1	0.346	1	0.774	1	0.748	1	0.0849	1	0.751	1	0.411	1	0.0297	1	C-X-C chemokine binding	F
GO:0019959	11	0.223	1	0.139	1	1	1	0.574	1	0.118	1	0.272	1	0.349	1	0.0273	1	interleukin-8 binding	F
GO:0019965	58	0.963	1	0.922	1	0.997	1	0.998	1	0.798	1	0.967	1	0.593	1	0.168	1	interleukin binding	F
GO:0019966	30	1	1	0.999	1	1	1	0.998	1	0.999	1	0.987	1	1	1	0.964	1	interleukin-1 binding	F
GO:0019992	55	0.00345	0.186	0.0211	1	0.0309	1	0.149	1	0.0164	0.719	0.217	1	0.00623	0.201	0.00044	0.021	diacylglycerol binding	F
GO:0020037	194	1	1	1	1	1	1	0.987	1	0.998	1	1	1	0.604	1	0.712	1	heme binding	F
GO:0021510	37	1	1	1	1	1	1	1	1	1	1	1	1	0.986	1	0.993	1	spinal cord development	P
GO:0021515	25	1	1	1	1	1	1	1	1	1	1	1	1	0.981	1	0.998	1	cell differentiation in spinal cord	P
GO:0021516	11	1	1	1	1	1	1	1	1	1	1	1	1	1	1	0.999	1	dorsal spinal cord development	P
GO:0021517	17	1	1	1	1	1	1	0.999	1	1	1	1	1	0.867	1	0.963	1	ventral spinal cord development	P
GO:0021522	15	0.998	1	0.999	1	1	1	0.996	1	1	1	1	1	0.773	1	0.918	1	spinal cord motor neuron differentiation	P
GO:0021532	13	0.996	1	0.973	1	0.999	1	0.948	1	1	1	0.997	1	0.751	1	0.802	1	neural tube patterning	P
GO:0021533	14	0.964	1	0.964	1	0.976	1	0.931	1	0.996	1	0.993	1	0.749	1	0.77	1	cell differentiation in hindbrain	P
GO:0021534	10	0.964	1	0.986	1	0.977	1	1	1	0.988	1	0.84	1	0.743	1	0.697	1	cell proliferation in hindbrain	P
GO:0021536	28	1	1	0.586	1	1	1	0.297	1	0.997	1	0.99	1	0.999	1	0.997	1	diencephalon development	P
GO:0021537	50	0.65	1	0.642	1	0.637	1	0.647	1	0.508	1	0.43	1	0.809	1	0.899	1	telencephalon development	P
GO:0021543	35	0.233	1	0.451	1	0.182	1	0.503	1	0.161	1	0.252	1	0.651	1	0.805	1	pallium development	P
GO:0021545	13	1	1	0.999	1	1	1	0.982	1	1	1	0.95	1	1	1	1	1	cranial nerve development	P
GO:0021549	26	0.731	1	0.972	1	0.91	1	0.994	1	0.61	1	0.951	1	0.408	1	0.489	1	cerebellum development	P
GO:0021575	19	0.541	1	0.91	1	0.726	1	0.972	1	0.599	1	0.887	1	0.266	1	0.348	1	hindbrain morphogenesis	P
GO:0021587	18	0.52	1	0.882	1	0.689	1	0.956	1	0.564	1	0.873	1	0.278	1	0.326	1	cerebellum morphogenesis	P
GO:0021675	19	1	1	0.998	1	0.998	1	0.997	1	1	1	0.946	1	0.997	1	1	1	nerve development	P
GO:0021680	11	0.735	1	0.854	1	0.964	1	0.929	1	0.787	1	0.904	1	0.333	1	0.491	1	cerebellar Purkinje cell layer development	P
GO:0021695	20	0.499	1	0.894	1	0.701	1	0.969	1	0.494	1	0.857	1	0.275	1	0.358	1	cerebellar cortex development	P
GO:0021696	17	0.448	1	0.824	1	0.614	1	0.928	1	0.513	1	0.824	1	0.244	1	0.278	1	cerebellar cortex morphogenesis	P
GO:0021697	13	0.584	1	0.928	1	0.704	1	0.882	1	0.53	1	0.983	1	0.435	1	0.671	1	cerebellar cortex formation	P
GO:0021700	90	0.841	1	1	1	0.708	1	0.989	1	0.913	1	1	1	0.579	1	0.998	1	developmental maturation	P
GO:0021761	20	0.356	1	0.458	1	0.201	1	0.426	1	0.368	1	0.393	1	0.665	1	0.584	1	limbic system development	P
GO:0021766	16	0.107	1	0.219	1	0.0541	1	0.205	1	0.165	1	0.165	1	0.324	1	0.39	1	hippocampus development	P
GO:0021782	14	0.263	1	0.56	1	0.131	1	0.599	1	0.226	1	0.462	1	0.755	1	0.599	1	glial cell development	P
GO:0021795	11	0.17	1	0.51	1	0.327	1	0.743	1	0.0674	1	0.472	1	0.386	1	0.468	1	cerebral cortex cell migration	P
GO:0021872	11	0.968	1	0.959	1	0.95	1	0.993	1	0.968	1	0.956	1	0.913	1	0.859	1	generation of neurons in the forebrain	P
GO:0021885	14	0.362	1	0.757	1	0.549	1	0.927	1	0.184	1	0.69	1	0.564	1	0.676	1	forebrain cell migration	P
GO:0021895	13	0.896	1	0.714	1	0.942	1	0.799	1	0.833	1	0.679	1	0.867	1	0.638	1	cerebral cortex neuron differentiation	P
GO:0021915	62	0.949	1	0.54	1	0.94	1	0.486	1	0.822	1	0.714	1	0.985	1	0.502	1	neural tube development	P
GO:0021924	10	0.964	1	0.986	1	0.977	1	1	1	0.988	1	0.84	1	0.743	1	0.697	1	cell proliferation in the external granule layer	P
GO:0021930	10	0.964	1	0.986	1	0.977	1	1	1	0.988	1	0.84	1	0.743	1	0.697	1	granule cell precursor proliferation	P
GO:0021953	33	0.667	1	0.813	1	0.816	1	0.887	1	0.586	1	0.816	1	0.547	1	0.553	1	central nervous system neuron differentiation	P
GO:0021954	29	0.734	1	0.721	1	0.849	1	0.822	1	0.581	1	0.727	1	0.65	1	0.476	1	central nervous system neuron development	P
GO:0021955	14	0.583	1	0.306	1	0.724	1	0.346	1	0.52	1	0.405	1	0.528	1	0.267	1	central nervous system neuron axonogenesis	P
GO:0021983	22	1	1	0.438	1	1	1	0.257	1	1	1	0.978	1	0.997	1	0.954	1	pituitary gland development	P
GO:0021987	26	0.0313	1	0.12	1	0.0232	1	0.124	1	0.0475	1	0.0852	1	0.294	1	0.428	1	cerebral cortex development	P
GO:0022008	420	1	1	1	1	1	1	1	1	1	1	1	1	0.98	1	1	1	neurogenesis	P
GO:0022029	13	0.273	1	0.668	1	0.456	1	0.88	1	0.133	1	0.607	1	0.453	1	0.572	1	telencephalon cell migration	P
GO:0022037	31	0.825	1	0.998	1	0.978	1	1	1	0.502	1	0.994	1	0.604	1	0.745	1	metencephalon development	P
GO:0030001	575	0.474	1	0.999	1	0.982	1	0.935	1	0.872	1	1	1	0.00767	0.201	0.719	1	metal ion transport	P
GO:0030003	144	0.082	1	0.914	1	0.197	1	0.544	1	0.182	1	0.997	1	0.102	1	0.83	1	cation homeostasis	P
GO:0030004	18	0.466	1	0.555	1	0.542	1	0.516	1	0.978	1	0.763	1	0.373	1	0.24	1	monovalent inorganic cation homeostasis	P
GO:0030005	126	0.0705	1	0.867	1	0.186	1	0.471	1	0.0948	1	0.99	1	0.113	1	0.874	1	di-, tri-valent inorganic cation homeostasis	P
GO:0030010	12	0.526	1	0.729	1	0.393	1	0.836	1	0.85	1	0.811	1	0.829	1	0.37	1	establishment of cell polarity	P
GO:0030016	83	0.655	1	0.999	1	0.398	1	0.998	1	0.676	1	0.995	1	0.469	1	0.971	1	myofibril	C
GO:0030017	74	0.545	1	0.995	1	0.338	1	0.993	1	0.541	1	0.981	1	0.504	1	0.956	1	sarcomere	C
GO:0030018	36	0.314	1	0.8	1	0.0935	1	0.901	1	0.499	1	0.603	1	0.545	1	0.923	1	Z disc	C
GO:0030027	56	0.109	1	0.0423	1	0.168	1	0.134	1	0.137	1	0.189	1	0.0704	1	0.0587	1	lamellipodium	C
GO:0030029	226	0.0335	1	0.0703	1	0.125	1	0.145	1	0.298	1	0.524	1	0.0323	0.753	0.0294	1	actin filament-based process	P
GO:0030030	323	0.992	1	1	1	0.999	1	0.999	1	1	1	0.999	1	0.602	1	0.968	1	cell projection organization and biogenesis	P
GO:0030031	82	0.665	1	0.00285	0.187	0.527	1	0.00968	0.378	0.801	1	0.0128	1	0.696	1	0.0314	1	cell projection biogenesis	P
GO:0030032	18	0.938	1	0.0508	1	0.901	1	0.0706	1	0.813	1	0.0844	1	0.998	1	0.108	1	lamellipodium biogenesis	P
GO:0030035	15	0.0621	1	0.0676	1	0.199	1	0.443	1	0.103	1	0.172	1	0.126	1	0.0164	0.94	microspike biogenesis	P
GO:0030036	206	0.0367	1	0.0642	1	0.184	1	0.164	1	0.177	1	0.489	1	0.0443	0.834	0.0296	1	actin cytoskeleton organization and biogenesis	P
GO:0030041	36	0.221	1	0.0605	1	0.354	1	0.0607	1	0.467	1	0.399	1	0.159	1	0.0772	1	actin filament polymerization	P
GO:0030042	22	0.0326	1	0.0667	1	0.21	1	0.157	1	0.123	1	0.147	1	0.0187	0.471	0.0425	1	actin filament depolymerization	P
GO:0030048	15	0.142	1	0.2	1	0.394	1	0.113	1	0.183	1	0.438	1	0.108	1	0.108	1	actin filament-based movement	P
GO:0030054	455	0.561	1	0.958	1	0.803	1	0.839	1	0.97	1	1	1	0.00155	0.044	0.21	1	cell junction	C
GO:0030055	49	0.107	1	0.496	1	0.204	1	0.466	1	0.54	1	0.812	1	0.0292	0.606	0.366	1	cell-matrix junction	C
GO:0030057	15	0.553	1	0.417	1	0.935	1	0.325	1	0.37	1	0.461	1	0.207	1	0.558	1	desmosome	C
GO:0030072	43	0.654	1	0.629	1	0.855	1	0.856	1	0.199	1	0.507	1	0.9	1	0.282	1	peptide hormone secretion	P
GO:0030073	37	0.56	1	0.476	1	0.807	1	0.741	1	0.165	1	0.384	1	0.884	1	0.208	1	insulin secretion	P
GO:0030097	262	0.888	1	0.596	1	0.843	1	0.248	1	0.785	1	0.952	1	0.979	1	0.952	1	hemopoiesis	P
GO:0030098	109	0.244	1	0.179	1	0.453	1	0.102	1	0.683	1	0.972	1	0.172	1	0.262	1	lymphocyte differentiation	P
GO:0030099	129	0.833	1	0.861	1	0.832	1	0.774	1	0.42	1	0.915	1	0.99	1	0.947	1	myeloid cell differentiation	P
GO:0030100	46	0.274	1	0.824	1	0.657	1	0.766	1	0.192	1	0.785	1	0.185	1	0.866	1	regulation of endocytosis	P
GO:0030101	12	0.0269	1	0.229	1	0.128	1	0.258	1	0.0599	1	0.198	1	0.0993	1	0.367	1	natural killer cell activation	P
GO:0030111	28	0.707	1	0.928	1	0.697	1	0.931	1	0.545	1	0.881	1	0.711	1	0.829	1	regulation of Wnt receptor signaling pathway	P
GO:0030117	61	8.77e-07	0.002	2.14e-07	0.00266	0.00147	0.079	4.34e-07	0.001	3.6e-05	0.00156	0.000124	0.0136	0.000863	0.024	0.00194	0.063	membrane coat	C
GO:0030118	39	0.000123	0.019	7.32e-05	0.028	0.0104	0.474	4.57e-05	0.00541	0.0133	0.481	0.00675	0.355	0.00265	0.0554	0.00721	0.258	clathrin coat	C
GO:0030119	28	0.000241	0.019	0.000388	0.043	0.00868	0.469	0.000195	0.011	0.0353	1	0.0306	1	0.00485	0.0775	0.00589	0.258	membrane coat adaptor complex	C
GO:0030120	30	0.000198	0.019	4.25e-05	0.028	0.0246	1	0.000178	0.011	0.000168	0.008	0.00217	0.143	0.00199	0.0554	0.0168	0.94	vesicle coat	C
GO:0030125	16	0.0136	0.983	0.00209	0.162	0.114	1	0.0016	0.044	0.0362	1	0.0395	1	0.0114	0.439	0.0473	1	clathrin vesicle coat	C
GO:0030131	28	0.000241	0.019	0.000388	0.043	0.00868	0.469	0.000195	0.011	0.0353	1	0.0306	1	0.00485	0.0775	0.00589	0.258	clathrin adaptor complex	C
GO:0030133	41	0.0717	1	0.101	1	0.231	1	0.128	1	0.0987	1	0.13	1	0.129	1	0.212	1	transport vesicle	C
GO:0030135	120	0.00286	0.139	0.144	1	0.181	1	0.313	1	0.00591	0.165	0.191	1	0.00105	0.024	0.168	1	coated vesicle	C
GO:0030136	103	0.0383	1	0.511	1	0.444	1	0.689	1	0.087	1	0.507	1	0.00401	0.0775	0.337	1	clathrin-coated vesicle	C
GO:0030137	11	0.000257	0.019	0.00196	0.162	0.0303	1	0.00416	0.142	1.16e-05	0.00156	0.0228	1	0.0146	0.439	0.19	1	COPI-coated vesicle	C
GO:0030139	23	0.285	1	0.344	1	0.506	1	0.326	1	0.728	1	0.48	1	0.102	1	0.54	1	endocytic vesicle	C
GO:0030140	19	0.0808	1	0.13	1	0.509	1	0.0253	0.769	0.0841	1	0.199	1	0.0293	0.606	0.495	1	trans-Golgi network transport vesicle	C
GO:0030141	55	0.136	1	0.222	1	0.922	1	0.218	1	0.16	1	0.565	1	0.064	1	0.0969	1	secretory granule	C
GO:0030145	139	0.00771	0.618	0.00102	0.073	0.0153	0.81	0.018	0.769	0.0774	1	0.00228	0.143	0.021	0.529	0.0109	0.643	manganese ion binding	F
GO:0030148	20	0.394	1	0.0341	1	0.33	1	0.0243	0.769	0.783	1	0.501	1	0.324	1	0.103	1	sphingolipid biosynthesis	P
GO:0030149	11	0.0672	1	0.167	1	0.00992	0.474	0.216	1	0.599	1	0.453	1	0.751	1	0.232	1	sphingolipid catabolism	P
GO:0030154	1347	1	1	1	1	1	1	0.971	1	1	1	1	1	0.999	1	0.996	1	cell differentiation	P
GO:0030155	65	0.739	1	0.674	1	0.871	1	0.85	1	0.756	1	0.693	1	0.375	1	0.248	1	regulation of cell adhesion	P
GO:0030162	14	0.59	1	0.362	1	0.625	1	0.16	1	0.637	1	0.899	1	0.546	1	0.797	1	regulation of proteolysis	P
GO:0030163	221	4.79e-08	0.000973	1.83e-12	0	6.78e-07	0.000988	3.69e-10	0	3.66e-07	0.000765	3.56e-08	0.000771	0.189	1	1.12e-05	0.00391	protein catabolism	P
GO:0030165	29	0.671	1	0.979	1	0.88	1	0.916	1	0.818	1	0.981	1	0.245	1	0.957	1	PDZ domain binding	F
GO:0030166	22	0.944	1	0.848	1	1	1	0.965	1	0.471	1	0.984	1	0.746	1	0.286	1	proteoglycan biosynthesis	P
GO:0030168	16	0.884	1	0.418	1	0.922	1	0.49	1	0.809	1	0.849	1	0.769	1	0.158	1	platelet activation	P
GO:0030169	14	0.0453	1	0.271	1	0.0179	0.81	0.506	1	0.0768	1	0.25	1	0.688	1	0.608	1	low-density lipoprotein binding	F
GO:0030170	63	0.0382	1	0.0164	1	0.0784	1	0.278	1	0.00947	0.369	0.00204	0.143	0.144	1	0.102	1	pyridoxal phosphate binding	F
GO:0030173	32	0.163	1	0.613	1	0.333	1	0.819	1	0.95	1	0.762	1	0.0182	0.471	0.0776	1	integral to Golgi membrane	C
GO:0030175	18	0.0389	1	0.211	1	0.223	1	0.214	1	0.0142	0.481	0.505	1	0.165	1	0.229	1	filopodium	C
GO:0030176	33	0.269	1	0.0308	1	0.533	1	0.0628	1	0.123	1	0.0802	1	0.741	1	0.121	1	integral to endoplasmic reticulum membrane	C
GO:0030178	20	0.305	1	0.771	1	0.235	1	0.888	1	0.268	1	0.678	1	0.415	1	0.554	1	negative regulation of Wnt receptor signaling pathway	P
GO:0030182	342	1	1	1	1	1	1	1	1	1	1	1	1	0.976	1	1	1	neuron differentiation	P
GO:0030183	47	0.404	1	0.0991	1	0.354	1	0.101	1	0.948	1	0.83	1	0.248	1	0.187	1	B cell differentiation	P
GO:0030193	13	0.762	1	0.376	1	0.886	1	0.67	1	0.513	1	0.596	1	0.533	1	0.117	1	regulation of blood coagulation	P
GO:0030198	78	0.984	1	0.999	1	0.999	1	0.984	1	0.999	1	1	1	0.539	1	0.89	1	extracellular matrix organization and biogenesis	P
GO:0030199	12	0.914	1	0.847	1	0.992	1	0.974	1	0.493	1	0.905	1	0.801	1	0.262	1	collagen fibril organization	P
GO:0030203	29	0.719	1	0.594	1	0.877	1	0.646	1	0.27	1	0.825	1	0.94	1	0.395	1	glycosaminoglycan metabolism	P
GO:0030216	35	0.512	1	0.566	1	0.388	1	0.271	1	0.239	1	0.984	1	1	1	0.999	1	keratinocyte differentiation	P
GO:0030217	71	0.323	1	0.833	1	0.844	1	0.471	1	0.662	1	0.999	1	0.118	1	0.446	1	T cell differentiation	P
GO:0030218	50	0.599	1	0.369	1	0.495	1	0.34	1	0.373	1	0.595	1	0.962	1	0.87	1	erythrocyte differentiation	P
GO:0030225	11	0.982	1	0.882	1	0.777	1	0.886	1	0.991	1	0.769	1	0.991	1	0.96	1	macrophage differentiation	P
GO:0030234	815	0.34	1	0.802	1	0.759	1	0.917	1	0.292	1	0.975	1	0.283	1	0.112	1	enzyme regulator activity	F
GO:0030238	10	0.916	1	0.978	1	0.999	1	0.924	1	0.913	1	1	1	0.389	1	0.589	1	male sex determination	P
GO:0030239	18	0.464	1	0.52	1	0.338	1	0.243	1	0.999	1	0.746	1	0.311	1	0.742	1	myofibril assembly	P
GO:0030246	311	0.997	1	0.999	1	1	1	1	1	1	1	0.999	1	0.0665	1	0.4	1	carbohydrate binding	F
GO:0030247	95	0.942	1	1	1	0.992	1	1	1	0.981	1	1	1	0.172	1	0.895	1	polysaccharide binding	F
GO:0030258	37	0.0456	1	0.00416	0.382	0.045	1	0.00811	0.378	0.0961	1	0.0473	1	0.33	1	0.000992	0.044	lipid modification	P
GO:0030261	21	0.00647	0.364	0.00723	0.559	0.0194	0.81	0.019	0.769	0.00331	0.135	0.0105	0.401	0.297	1	0.138	1	chromosome condensation	P
GO:0030262	16	0.022	1	0.000529	0.073	0.0255	1	0.000158	0.0058	0.0939	1	0.069	1	0.236	1	0.0465	1	apoptotic nuclear changes	P
GO:0030278	38	0.953	1	0.996	1	0.994	1	1	1	0.604	1	0.996	1	0.857	1	0.752	1	regulation of ossification	P
GO:0030279	12	0.392	1	0.839	1	0.582	1	0.904	1	0.145	1	0.986	1	0.504	1	0.49	1	negative regulation of ossification	P
GO:0030282	36	0.923	1	0.942	1	0.995	1	0.877	1	0.577	1	0.996	1	0.515	1	0.51	1	bone mineralization	P
GO:0030286	37	0.119	1	0.388	1	0.113	1	0.43	1	0.214	1	0.313	1	0.156	1	0.548	1	dynein complex	C
GO:0030288	20	0.695	1	0.998	1	0.967	1	0.773	1	0.671	1	1	1	0.118	1	0.955	1	periplasmic space (sensu Proteobacteria)	C
GO:0030295	11	0.951	1	0.478	1	0.86	1	0.78	1	0.552	1	0.403	1	1	1	0.807	1	protein kinase activator activity	F
GO:0030301	15	0.232	1	0.526	1	0.278	1	0.649	1	0.242	1	0.443	1	0.287	1	0.443	1	cholesterol transport	P
GO:0030308	48	0.0889	1	0.389	1	0.0606	1	0.119	1	0.498	1	0.857	1	0.0685	1	0.335	1	negative regulation of cell growth	P
GO:0030312	24	0.581	1	0.994	1	0.829	1	0.774	1	0.6	1	0.997	1	0.162	1	0.973	1	external encapsulating structure	C
GO:0030313	22	0.593	1	0.996	1	0.929	1	0.787	1	0.564	1	1	1	0.123	1	0.964	1	cell envelope	C
GO:0030315	16	0.922	1	0.991	1	0.994	1	1	1	0.92	1	0.955	1	0.516	1	0.866	1	T-tubule	C
GO:0030316	21	0.939	1	0.705	1	0.77	1	0.665	1	0.821	1	0.679	1	1	1	0.542	1	osteoclast differentiation	P
GO:0030317	29	0.684	1	0.737	1	0.654	1	0.304	1	0.853	1	0.994	1	0.485	1	0.998	1	sperm motility	P
GO:0030318	18	0.966	1	0.933	1	0.973	1	0.973	1	0.944	1	0.974	1	0.785	1	0.358	1	melanocyte differentiation	P
GO:0030321	10	0.769	1	0.993	1	0.614	1	0.982	1	0.995	1	0.879	1	0.265	1	0.987	1	transepithelial chloride transport	P
GO:0030323	90	1	1	0.938	1	1	1	0.896	1	1	1	0.992	1	0.824	1	0.515	1	respiratory tube development	P
GO:0030324	88	1	1	0.917	1	1	1	0.874	1	1	1	0.988	1	0.787	1	0.471	1	lung development	P
GO:0030325	10	0.998	1	1	1	0.753	1	1	1	1	1	1	1	1	1	1	1	adrenal gland development	P
GO:0030326	85	1	1	1	1	1	1	1	1	1	1	1	1	1	1	0.997	1	embryonic limb morphogenesis	P
GO:0030330	17	0.212	1	0.56	1	0.17	1	0.121	1	0.803	1	0.927	1	0.693	1	0.394	1	DNA damage response, signal transduction by p53 class mediator	P
GO:0030334	85	0.785	1	0.984	1	0.723	1	1	1	0.914	1	0.982	1	0.394	1	0.631	1	regulation of cell migration	P
GO:0030335	36	0.543	1	0.939	1	0.66	1	1	1	0.687	1	0.984	1	0.243	1	0.146	1	positive regulation of cell migration	P
GO:0030336	24	0.774	1	0.829	1	0.37	1	0.646	1	0.979	1	0.813	1	0.57	1	0.998	1	negative regulation of cell migration	P
GO:0030374	19	0.165	1	0.394	1	0.0473	1	0.0923	1	0.427	1	0.866	1	0.486	1	0.905	1	ligand-dependent nuclear receptor transcription coactivator activity	F
GO:0030375	11	0.289	1	0.642	1	0.299	1	0.194	1	0.389	1	0.973	1	0.343	1	0.947	1	thyroid hormone receptor coactivator activity	F
GO:0030384	60	0.00136	0.093	7.25e-05	0.028	0.000681	0.03	0.000814	0.027	0.0675	1	0.00127	0.051	0.0264	0.606	0.00318	0.216	phosphoinositide metabolism	P
GO:0030414	219	1	1	1	1	1	1	1	1	0.976	1	1	1	0.937	1	0.998	1	protease inhibitor activity	F
GO:0030424	80	0.933	1	0.999	1	0.971	1	1	1	0.649	1	0.999	1	0.835	1	0.735	1	axon	C
GO:0030425	76	0.445	1	0.994	1	0.86	1	0.962	1	0.173	1	1	1	0.349	1	0.638	1	dendrite	C
GO:0030426	34	0.355	1	0.742	1	0.151	1	0.962	1	0.587	1	0.721	1	0.667	1	0.331	1	growth cone	C
GO:0030427	34	0.355	1	0.742	1	0.151	1	0.962	1	0.587	1	0.721	1	0.667	1	0.331	1	site of polarized growth	C
GO:0030433	11	0.19	1	0.00215	0.162	0.11	1	0.00324	0.142	0.197	1	0.0731	1	0.797	1	0.0464	1	ER-associated protein catabolism	P
GO:0030496	10	0.142	1	0.052	1	0.0981	1	0.0382	1	0.496	1	0.561	1	0.264	1	0.127	1	midbody	C
GO:0030500	24	0.968	1	0.973	1	0.999	1	0.993	1	0.478	1	0.997	1	0.831	1	0.603	1	regulation of bone mineralization	P
GO:0030501	12	0.891	1	0.701	1	0.998	1	0.782	1	0.693	1	0.82	1	0.485	1	0.356	1	positive regulation of bone mineralization	P
GO:0030509	41	0.984	1	0.981	1	0.987	1	0.998	1	0.963	1	0.885	1	0.817	1	0.954	1	BMP signaling pathway	P
GO:0030510	20	0.939	1	0.863	1	0.987	1	0.891	1	0.922	1	0.614	1	0.378	1	0.997	1	regulation of BMP signaling pathway	P
GO:0030512	10	0.204	1	0.127	1	0.272	1	0.192	1	0.0748	1	0.0687	1	0.509	1	0.132	1	negative regulation of transforming growth factor beta receptor signaling pathway	P
GO:0030514	13	0.999	1	0.822	1	1	1	0.935	1	0.893	1	0.535	1	0.551	1	0.99	1	negative regulation of BMP signaling pathway	P
GO:0030516	15	0.486	1	0.714	1	0.877	1	0.76	1	0.734	1	0.817	1	0.153	1	0.418	1	regulation of axon extension	P
GO:0030518	24	0.0331	1	0.0817	1	0.00973	0.474	0.0338	1	0.17	1	0.244	1	0.889	1	0.471	1	steroid hormone receptor signaling pathway	P
GO:0030521	13	0.0201	1	0.0484	1	0.00532	0.188	0.0105	0.378	0.0578	1	0.233	1	0.978	1	0.671	1	androgen receptor signaling pathway	P
GO:0030522	34	0.293	1	0.442	1	0.0451	1	0.26	1	0.557	1	0.486	1	0.996	1	0.807	1	intracellular receptor-mediated signaling pathway	P
GO:0030528	1329	0.895	1	0.496	1	0.765	1	0.0482	1	0.991	1	0.947	1	0.762	1	0.83	1	transcription regulator activity	F
GO:0030529	490	0.00926	0.983	3.53e-12	0	0.00238	0.118	6.34e-12	0	0.0772	1	2.5e-06	0.002	0.996	1	0.178	1	ribonucleoprotein complex	C
GO:0030532	15	0.00111	0.093	0.000156	0.028	0.0208	1	0.00208	0.045	0.145	1	0.0804	1	0.105	1	0.0719	1	small nuclear ribonucleoprotein complex	C
GO:0030534	82	0.63	1	0.998	1	0.623	1	0.973	1	0.626	1	1	1	0.564	1	0.945	1	adult behavior	P
GO:0030539	11	1	1	0.913	1	1	1	0.994	1	0.956	1	0.866	1	1	1	0.653	1	male genitalia development	P
GO:0030545	10	0.714	1	0.998	1	0.653	1	0.971	1	0.761	1	0.998	1	0.452	1	0.956	1	receptor regulator activity	F
GO:0030551	26	0.964	1	0.447	1	0.992	1	0.955	1	0.382	1	0.182	1	0.952	1	0.209	1	cyclic nucleotide binding	F
GO:0030552	18	0.989	1	0.358	1	1	1	0.713	1	0.58	1	0.352	1	0.933	1	0.143	1	cAMP binding	F
GO:0030554	1620	2.36e-17	0	1.28e-24	0	1.79e-10	0	1.81e-14	0	3.63e-13	0	1.11e-16	0	5.07e-08	0.000633	1.37e-12	0	adenyl nucleotide binding	F
GO:0030574	17	0.978	1	0.891	1	0.73	1	0.858	1	0.969	1	0.916	1	1	1	0.345	1	collagen catabolism	P
GO:0030593	16	0.91	1	0.547	1	0.581	1	0.767	1	0.932	1	0.69	1	0.9	1	0.144	1	neutrophil chemotaxis	P
GO:0030594	210	0.999	1	0.994	1	1	1	0.934	1	0.992	1	1	1	0.529	1	0.445	1	neurotransmitter receptor activity	F
GO:0030595	32	1	1	0.913	1	0.918	1	0.858	1	1	1	0.932	1	0.999	1	0.631	1	leukocyte chemotaxis	P
GO:0030641	13	0.244	1	0.395	1	0.305	1	0.341	1	0.866	1	0.571	1	0.37	1	0.215	1	hydrogen ion homeostasis	P
GO:0030658	17	0.011	0.983	0.0177	1	0.19	1	0.00618	0.378	0.0146	0.481	0.0233	1	0.012	0.439	0.127	1	transport vesicle membrane	C
GO:0030659	93	0.00594	0.364	0.0205	1	0.0373	1	0.0634	1	0.0423	1	0.0585	1	0.0388	0.783	0.0798	1	cytoplasmic vesicle membrane	C
GO:0030660	19	0.00303	0.139	0.00627	0.559	0.0684	1	0.00221	0.045	0.0105	0.414	0.0108	0.401	0.00405	0.0775	0.097	1	Golgi-associated vesicle membrane	C
GO:0030662	33	0.000176	0.019	0.00013	0.028	0.03	1	0.000286	0.013	0.000596	0.044	0.00254	0.143	0.00173	0.0554	0.0248	1	coated vesicle membrane	C
GO:0030665	19	0.0105	0.983	0.0061	0.559	0.138	1	0.00335	0.142	0.0359	1	0.0418	1	0.0102	0.217	0.0724	1	clathrin coated vesicle membrane	C
GO:0030667	10	0.731	1	0.123	1	0.874	1	0.413	1	0.636	1	0.17	1	0.989	1	0.126	1	secretory granule membrane	C
GO:0030672	16	0.533	1	0.932	1	0.551	1	0.885	1	0.866	1	0.984	1	0.372	1	0.881	1	synaptic vesicle membrane	C
GO:0030674	34	0.0679	1	0.207	1	0.0543	1	0.17	1	0.256	1	0.567	1	0.108	1	0.21	1	protein binding, bridging	F
GO:0030693	16	0.871	1	0.868	1	0.645	1	0.55	1	0.992	1	0.629	1	0.603	1	1	1	caspase activity	F
GO:0030695	367	0.00647	0.364	0.181	1	0.0628	1	0.815	1	0.0249	1	0.479	1	0.0124	0.439	0.00213	0.063	GTPase regulator activity	F
GO:0030705	131	7.38e-05	0.007	0.00195	0.162	0.000515	0.0161	0.00699	0.378	0.000974	0.044	0.0198	1	0.0232	0.56	0.029	1	cytoskeleton-dependent intracellular transport	P
GO:0030728	11	0.609	1	0.87	1	0.875	1	0.998	1	0.731	1	1	1	0.11	1	0.157	1	ovulation	P
GO:0030799	16	0.616	1	0.935	1	0.896	1	1	1	0.965	1	0.982	1	0.462	1	0.825	1	regulation of cyclic nucleotide metabolism	P
GO:0030801	10	0.536	1	0.997	1	0.862	1	1	1	0.989	1	1	1	0.463	1	1	1	positive regulation of cyclic nucleotide metabolism	P
GO:0030802	12	0.482	1	0.929	1	0.843	1	0.998	1	0.951	1	0.98	1	0.379	1	0.996	1	regulation of cyclic nucleotide biosynthesis	P
GO:0030808	12	0.482	1	0.929	1	0.843	1	0.998	1	0.951	1	0.98	1	0.379	1	0.996	1	regulation of nucleotide biosynthesis	P
GO:0030814	11	0.646	1	0.948	1	0.95	1	0.999	1	0.866	1	0.923	1	0.924	1	0.839	1	regulation of cAMP metabolism	P
GO:0030832	52	0.0651	1	0.0436	1	0.238	1	0.0406	1	0.184	1	0.272	1	0.054	1	0.0407	1	regulation of actin filament length	P
GO:0030833	27	0.181	1	0.0841	1	0.3	1	0.0358	1	0.338	1	0.512	1	0.136	1	0.13	1	regulation of actin filament polymerization	P
GO:0030834	22	0.0326	1	0.0667	1	0.21	1	0.157	1	0.123	1	0.147	1	0.0187	0.471	0.0425	1	regulation of actin filament depolymerization	P
GO:0030835	20	0.025	1	0.0926	1	0.121	1	0.348	1	0.0815	1	0.154	1	0.00305	0.0554	0.0306	1	negative regulation of actin filament depolymerization	P
GO:0030855	53	0.994	1	0.993	1	0.969	1	0.994	1	0.989	1	0.986	1	0.991	1	0.976	1	epithelial cell differentiation	P
GO:0030856	10	0.972	1	0.993	1	0.999	1	1	1	0.913	1	1	1	0.888	1	0.765	1	regulation of epithelial cell differentiation	P
GO:0030863	32	0.144	1	0.155	1	0.223	1	0.224	1	0.683	1	0.278	1	0.162	1	0.252	1	cortical cytoskeleton	C
GO:0030864	22	0.351	1	0.627	1	0.312	1	0.507	1	0.687	1	0.678	1	0.367	1	0.719	1	cortical actin cytoskeleton	C
GO:0030865	14	0.479	1	0.32	1	0.748	1	0.686	1	0.197	1	0.649	1	0.722	1	0.241	1	cortical cytoskeleton organization and biogenesis	P
GO:0030866	11	0.465	1	0.577	1	0.882	1	0.971	1	0.192	1	0.867	1	0.592	1	0.242	1	cortical actin cytoskeleton organization and biogenesis	P
GO:0030867	10	0.0543	1	0.381	1	0.213	1	0.733	1	0.384	1	0.204	1	0.00883	0.217	0.414	1	rough endoplasmic reticulum membrane	C
GO:0030878	11	1	1	1	1	0.998	1	0.986	1	0.996	1	1	1	1	1	1	1	thyroid gland development	P
GO:0030879	28	0.646	1	0.948	1	0.828	1	0.998	1	0.484	1	0.888	1	0.386	1	0.548	1	mammary gland development	P
GO:0030880	16	0.00642	0.364	0.00179	0.162	0.00793	0.343	0.00053	0.027	0.0305	1	0.0107	0.401	0.957	1	0.037	1	RNA polymerase complex	C
GO:0030888	28	0.971	1	0.947	1	0.994	1	0.409	1	0.777	1	1	1	0.821	1	0.808	1	regulation of B cell proliferation	P
GO:0030890	19	0.961	1	0.972	1	0.99	1	0.522	1	0.771	1	1	1	0.748	1	0.56	1	positive regulation of B cell proliferation	P
GO:0030900	134	1	1	0.884	1	1	1	0.489	1	0.986	1	0.974	1	1	1	0.997	1	forebrain development	P
GO:0030901	14	0.996	1	0.947	1	1	1	1	1	0.822	1	0.597	1	0.919	1	0.845	1	midbrain development	P
GO:0030902	54	1	1	1	1	1	1	1	1	0.945	1	1	1	0.988	1	0.998	1	hindbrain development	P
GO:0030955	103	0.97	1	1	1	0.999	1	0.997	1	0.9	1	1	1	0.926	1	0.974	1	potassium ion binding	F
GO:0030968	16	0.067	1	0.563	1	0.15	1	0.503	1	0.0585	1	0.699	1	0.151	1	0.589	1	unfolded protein response	P
GO:0030983	12	0.106	1	0.00545	0.559	0.311	1	0.0114	0.378	0.0998	1	0.00339	0.143	0.105	1	0.122	1	mismatched DNA binding	F
GO:0031012	321	0.999	1	1	1	0.999	1	1	1	1	1	1	1	0.254	1	0.999	1	extracellular matrix	C
GO:0031016	25	1	1	1	1	1	1	1	1	1	1	1	1	0.991	1	1	1	pancreas development	P
GO:0031018	15	0.991	1	1	1	1	1	1	1	0.973	1	1	1	0.872	1	0.998	1	endocrine pancreas development	P
GO:0031023	16	0.00179	0.102	0.000328	0.042	0.000853	0.0305	0.00337	0.142	0.031	1	0.0127	1	0.197	1	0.0269	1	microtubule organizing center organization and biogenesis	P
GO:0031032	12	0.209	1	0.16	1	0.516	1	0.504	1	0.523	1	0.0932	1	0.148	1	0.226	1	actomyosin structure organization and biogenesis	P
GO:0031047	12	0.422	1	0.14	1	0.602	1	0.326	1	0.151	1	0.0728	1	0.775	1	0.26	1	RNA-mediated gene silencing	P
GO:0031069	15	0.96	1	0.865	1	0.92	1	0.988	1	0.62	1	0.889	1	0.999	1	0.382	1	hair follicle morphogenesis	P
GO:0031072	59	0.00042	0.052	0.000188	0.028	0.00684	0.283	0.000979	0.036	0.00467	0.135	0.00087	0.048	0.194	1	0.283	1	heat shock protein binding	F
GO:0031090	1396	3.01e-18	0	7.92e-30	0	1.85e-09	0	5.48e-20	0	8.17e-11	0	7.68e-16	0	2.62e-08	0.000633	5.43e-14	0	organelle membrane	C
GO:0031098	53	0.941	1	0.986	1	0.988	1	0.991	1	0.932	1	0.855	1	0.6	1	0.967	1	stress-activated protein kinase signaling pathway	P
GO:0031099	28	0.886	1	0.995	1	0.998	1	0.983	1	0.765	1	1	1	0.409	1	0.447	1	regeneration	P
GO:0031105	13	0.44	1	0.206	1	0.502	1	0.108	1	0.731	1	0.779	1	0.259	1	0.726	1	septin complex	C
GO:0031109	31	0.168	1	0.684	1	0.349	1	0.472	1	0.429	1	0.758	1	0.0911	1	0.889	1	microtubule polymerization or depolymerization	P
GO:0031110	28	0.0953	1	0.65	1	0.249	1	0.422	1	0.304	1	0.708	1	0.0598	1	0.916	1	regulation of microtubule polymerization or depolymerization	P
GO:0031111	18	0.0208	1	0.146	1	0.196	1	0.148	1	0.0455	1	0.181	1	0.0206	0.529	0.388	1	negative regulation of microtubule polymerization or depolymerization	P
GO:0031112	11	0.406	1	1	1	0.368	1	0.936	1	1	1	0.999	1	0.234	1	1	1	positive regulation of microtubule polymerization or depolymerization	P
GO:0031113	12	0.192	1	0.908	1	0.332	1	0.813	1	0.607	1	0.915	1	0.11	1	0.974	1	regulation of microtubule polymerization	P
GO:0031114	16	0.0606	1	0.173	1	0.159	1	0.173	1	0.075	1	0.216	1	0.0631	1	0.461	1	regulation of microtubule depolymerization	P
GO:0031116	10	0.349	1	1	1	0.31	1	0.945	1	1	1	0.998	1	0.216	1	1	1	positive regulation of microtubule polymerization	P
GO:0031123	13	0.0688	1	0.00206	0.162	0.108	1	0.0012	0.044	0.712	1	0.0637	1	0.141	1	0.237	1	RNA 3'-end processing	P
GO:0031124	10	0.072	1	0.00621	0.559	0.0978	1	0.00214	0.045	0.642	1	0.092	1	0.255	1	0.3	1	mRNA 3'-end processing	P
GO:0031128	15	0.998	1	0.965	1	1	1	0.915	1	0.925	1	0.86	1	0.956	1	0.99	1	induction	P
GO:0031175	223	0.995	1	1	1	0.999	1	1	1	0.999	1	1	1	0.65	1	1	1	neurite development	P
GO:0031177	20	0.509	1	0.0196	1	0.372	1	0.0461	1	0.361	1	0.141	1	0.719	1	0.189	1	phosphopantetheine binding	F
GO:0031202	13	0.0646	1	0.00111	0.073	0.0653	1	0.0434	1	0.146	1	0.00563	0.202	0.552	1	0.15	1	RNA splicing factor activity, transesterification mechanism	F
GO:0031214	144	1	1	0.968	1	0.996	1	0.94	1	0.995	1	0.943	1	0.996	1	0.74	1	biomineral formation	P
GO:0031224	4901	0.767	1	0.99	1	1	1	1	1	0.94	1	1	1	0.000136	0.00645	0.00115	0.044	intrinsic to membrane	C
GO:0031225	124	0.917	1	0.795	1	0.726	1	0.937	1	0.969	1	0.844	1	0.679	1	0.378	1	anchored to membrane	C
GO:0031226	506	0.945	1	1	1	0.999	1	1	1	0.863	1	1	1	0.162	1	0.914	1	intrinsic to plasma membrane	C
GO:0031227	44	0.363	1	0.264	1	0.783	1	0.399	1	0.16	1	0.229	1	0.498	1	0.248	1	intrinsic to endoplasmic reticulum membrane	C
GO:0031228	32	0.163	1	0.613	1	0.333	1	0.819	1	0.95	1	0.762	1	0.0182	0.471	0.0776	1	intrinsic to Golgi membrane	C
GO:0031252	93	0.0674	1	0.0381	1	0.1	1	0.0864	1	0.0777	1	0.345	1	0.158	1	0.114	1	leading edge	C
GO:0031253	17	0.544	1	0.403	1	0.605	1	0.796	1	0.516	1	0.29	1	0.53	1	0.508	1	cell projection membrane	C
GO:0031267	61	0.019	0.983	0.066	1	0.228	1	0.152	1	0.0432	1	0.195	1	0.0149	0.439	0.0701	1	small GTPase binding	F
[truncated: 954 more rows]
