# Supplementary material for: Alu and B1 Repeats Have Been Selectively Retained in the Upstream and Intronic Regions of Genes of Specific Functional Classes
Source: PLoS Comput Biol. 2009 Dec 18;5(12):e1000610. doi: 10.1371/journal.pcbi.1000610 (PMC2784220; doi:10.1371/journal.pcbi.1000610)
Supplement: Table S8 — GO term p-values and q-values for rat B elements in upstream regions. (0.54 MB XLS) [file pcbi.1000610.s008.xls]

## Sheet: rat B upstream
		B+		B-
GO term id	genes	p-value	q-value	p-value	q-value	GO term description	GO term catecory
GO:0000003	372	0.00359	0.186	0.000145	0.014	reproduction	P
GO:0000015	16	0.982	1	0.754	1	phosphopyruvate hydratase complex	C
GO:0000041	57	0.009	0.665	0.0188	0.894	transition metal ion transport	P
GO:0000049	18	0.318	1	0.025	1	tRNA binding	F
GO:0000051	18	0.022	1	0.0245	1	urea cycle intermediate metabolism	P
GO:0000059	14	0.00136	0.115	0.00405	0.246	protein import into nucleus, docking	P
GO:0000060	20	0.0313	1	0.0961	1	protein import into nucleus, translocation	P
GO:0000062	17	0.0535	1	0.0584	1	acyl-CoA binding	F
GO:0000070	10	0.0553	1	0.0185	0.894	mitotic sister chromatid segregation	P
GO:0000074	183	0.00584	0.327	2.68e-05	0.007	regulation of progression through cell cycle	P
GO:0000075	30	0.00359	0.186	0.00352	0.197	cell cycle checkpoint	P
GO:0000077	17	0.0404	1	0.0155	0.894	DNA damage checkpoint	P
GO:0000079	15	0.00219	0.115	2.91e-05	0.008	regulation of cyclin-dependent protein kinase activity	P
GO:0000082	22	0.501	1	0.455	1	G1/S transition of mitotic cell cycle	P
GO:0000087	116	4.87e-06	0.003	1.96e-07	0.00295	M phase of mitotic cell cycle	P
GO:0000096	15	0.000152	0.025	0.0455	1	sulfur amino acid metabolism	P
GO:0000097	10	0.00175	0.115	0.0197	0.894	sulfur amino acid biosynthesis	P
GO:0000118	15	0.268	1	0.0311	1	histone deacetylase complex	C
GO:0000119	14	0.0651	1	0.00809	0.447	mediator complex	C
GO:0000122	135	0.00497	0.26	0.0317	1	negative regulation of transcription from RNA polymerase II promoter	P
GO:0000139	162	0.0843	1	0.000692	0.058	Golgi membrane	C
GO:0000149	23	0.498	1	0.685	1	SNARE binding	F
GO:0000151	66	0.000918	0.091	2.29e-05	0.007	ubiquitin ligase complex	C
GO:0000159	18	0.299	1	0.141	1	protein phosphatase type 2A complex	C
GO:0000165	128	0.0295	1	0.0014	0.0938	MAPKKK cascade	P
GO:0000166	2223	2.97e-24	0	8.43e-36	0	nucleotide binding	F
GO:0000175	10	0.11	1	0.0637	1	3'-5'-exoribonuclease activity	F
GO:0000186	16	0.16	1	0.0946	1	activation of MAPKK activity	P
GO:0000187	42	0.0503	1	0.0729	1	activation of MAPK activity	P
GO:0000209	15	0.0859	1	0.0013	0.06	protein polyubiquitination	P
GO:0000226	73	0.0126	0.89	0.000963	0.06	microtubule cytoskeleton organization and biogenesis	P
GO:0000228	77	0.000476	0.0385	0.00141	0.0938	nuclear chromosome	C
GO:0000245	13	0.217	1	0.116	1	spliceosome assembly	P
GO:0000267	483	0.0023	0.115	0.000185	0.016	cell fraction	C
GO:0000271	49	0.737	1	0.514	1	polysaccharide biosynthesis	P
GO:0000272	14	0.996	1	0.794	1	polysaccharide catabolism	P
GO:0000278	178	3.54e-05	0.00481	3.41e-07	0.00295	mitotic cell cycle	P
GO:0000279	167	3.51e-08	0.000884	6.24e-10	0.000377	M phase	P
GO:0000287	236	0.0242	1	7.12e-06	0.00553	magnesium ion binding	F
GO:0000299	13	0.0467	1	0.0429	1	integral to membrane of membrane fraction	C
GO:0000302	24	0.0508	1	0.0226	0.894	response to reactive oxygen species	P
GO:0000313	20	0.0193	0.965	0.0689	1	organellar ribosome	C
GO:0000315	10	0.137	1	0.465	1	organellar large ribosomal subunit	C
GO:0000323	126	6.73e-05	0.013	0.00161	0.0938	lytic vacuole	C
GO:0000375	29	0.0225	1	0.0374	1	RNA splicing, via transesterification reactions	P
GO:0000377	29	0.0225	1	0.0374	1	RNA splicing, via transesterification reactions with bulged adenosine as nucleophile	P
GO:0000398	29	0.0225	1	0.0374	1	nuclear mRNA splicing, via spliceosome	P
GO:0000502	42	0.057	1	0.327	1	proteasome complex (sensu Eukaryota)	C
GO:0000723	17	0.0642	1	0.0227	0.894	telomere maintenance	P
GO:0000724	12	0.124	1	0.0307	1	double-strand break repair via homologous recombination	P
GO:0000725	12	0.124	1	0.0307	1	recombinational repair	P
GO:0000775	47	0.0928	1	0.016	0.894	chromosome, pericentric region	C
GO:0000776	17	0.237	1	0.00964	0.447	kinetochore	C
GO:0000779	11	0.533	1	0.0919	1	condensed chromosome, pericentric region	C
GO:0000781	15	0.0532	1	0.0159	0.894	chromosome, telomeric region	C
GO:0000785	370	0.126	1	0.689	1	chromatin	C
GO:0000786	152	0.218	1	0.874	1	nucleosome	C
GO:0000790	25	0.12	1	0.0738	1	nuclear chromatin	C
GO:0000792	31	0.0199	0.965	0.00468	0.25	heterochromatin	C
GO:0000793	51	0.0151	0.89	0.005	0.25	condensed chromosome	C
GO:0000794	31	0.003	0.118	0.00905	0.447	condensed nuclear chromosome	C
GO:0000795	16	0.149	1	0.0259	1	synaptonemal complex	C
GO:0000819	10	0.0553	1	0.0185	0.894	sister chromatid segregation	P
GO:0000902	463	0.00152	0.115	0.000212	0.016	cell morphogenesis	P
GO:0000904	200	0.602	1	0.66	1	cellular morphogenesis during differentiation	P
GO:0000910	15	0.0264	1	0.00721	0.354	cytokinesis	P
GO:0000922	22	0.0489	1	0.0316	1	spindle pole	C
GO:0001501	278	0.974	1	0.966	1	skeletal development	P
GO:0001502	15	0.268	1	0.451	1	cartilage condensation	P
GO:0001503	163	0.777	1	0.544	1	ossification	P
GO:0001505	109	0.561	1	0.591	1	regulation of neurotransmitter levels	P
GO:0001508	47	0.203	1	0.48	1	regulation of action potential	P
GO:0001518	16	0.342	1	0.786	1	voltage-gated sodium channel complex	C
GO:0001522	10	0.233	1	0.453	1	pseudouridine synthesis	P
GO:0001523	13	1	1	0.738	1	retinoid metabolism	P
GO:0001525	120	0.146	1	0.0831	1	angiogenesis	P
GO:0001539	40	0.408	1	0.562	1	ciliary or flagellar motility	P
GO:0001541	20	0.123	1	0.0321	1	ovarian follicle development	P
GO:0001542	10	0.8	1	0.764	1	ovulation (sensu Mammalia)	P
GO:0001556	10	0.325	1	0.218	1	oocyte maturation	P
GO:0001558	92	0.276	1	0.0045	0.246	regulation of cell growth	P
GO:0001565	12	0.0439	1	0.135	1	phorbol ester receptor activity	F
GO:0001568	197	0.262	1	0.316	1	blood vessel development	P
GO:0001569	19	0.504	1	0.206	1	patterning of blood vessels	P
GO:0001570	28	0.497	1	0.773	1	vasculogenesis	P
GO:0001584	1849	1	1	1	1	rhodopsin-like receptor activity	F
GO:0001595	63	0.793	1	0.897	1	angiotensin receptor activity	F
GO:0001603	24	0.947	1	0.999	1	vasopressin-like receptor activity	F
GO:0001608	124	0.812	1	0.997	1	nucleotide receptor activity, G-protein coupled	F
GO:0001614	125	0.802	1	0.997	1	purinergic nucleotide receptor activity	F
GO:0001619	22	0.322	1	0.18	1	lysosphingolipid and lysophosphatidic acid receptor activity	F
GO:0001633	23	0.51	1	0.627	1	secretin-like receptor activity	F
GO:0001637	44	0.44	1	0.301	1	G-protein chemoattractant receptor activity	F
GO:0001649	68	0.879	1	0.345	1	osteoblast differentiation	P
GO:0001653	694	1	1	1	1	peptide receptor activity	F
GO:0001654	85	0.226	1	0.434	1	eye development	P
GO:0001655	73	0.954	1	0.76	1	urogenital system development	P
GO:0001656	35	0.976	1	0.985	1	metanephros development	P
GO:0001657	27	0.825	1	0.84	1	ureteric bud development	P
GO:0001658	19	0.883	1	0.538	1	ureteric bud branching	P
GO:0001659	167	0.0404	1	0.375	1	thermoregulation	P
GO:0001662	10	0.8	1	0.281	1	behavioral fear response	P
GO:0001664	73	0.0695	1	0.0795	1	G-protein-coupled receptor binding	F
GO:0001666	78	0.0016	0.115	0.000221	0.016	response to hypoxia	P
GO:0001669	25	0.441	1	0.721	1	acrosome	C
GO:0001673	16	0.0114	0.89	0.00145	0.0938	male germ cell nucleus	C
GO:0001676	11	0.359	1	0.301	1	long-chain fatty acid metabolism	P
GO:0001701	124	0.00112	0.091	0.00162	0.0938	embryonic development (sensu Mammalia)	P
GO:0001702	21	0.123	1	0.0784	1	gastrulation (sensu Deuterostomia)	P
GO:0001704	30	0.0493	1	0.00807	0.447	formation of primary germ layer	P
GO:0001707	26	0.0251	1	0.00172	0.095	mesoderm formation	P
GO:0001708	30	0.971	1	0.986	1	cell fate specification	P
GO:0001709	25	0.593	1	0.915	1	cell fate determination	P
GO:0001725	18	0.00797	0.665	0.00094	0.06	stress fiber	C
GO:0001726	28	0.000626	0.0385	0.000245	0.019	ruffle	C
GO:0001727	19	0.154	1	0.0365	1	lipid kinase activity	F
GO:0001750	18	0.372	1	0.0991	1	photoreceptor outer segment	C
GO:0001754	18	0.697	1	0.362	1	eye photoreceptor cell differentiation	P
GO:0001755	19	0.847	1	0.946	1	neural crest cell migration	P
GO:0001756	31	0.953	1	0.374	1	somitogenesis	P
GO:0001759	12	0.331	1	0.588	1	induction of an organ	P
GO:0001763	62	0.395	1	0.433	1	morphogenesis of a branching structure	P
GO:0001764	58	0.904	1	0.959	1	neuron migration	P
GO:0001772	17	0.079	1	0.0755	1	immunological synapse	C
GO:0001775	229	0.000119	0.025	0.000208	0.016	cell activation	P
GO:0001776	31	0.314	1	0.00314	0.197	leukocyte homeostasis	P
GO:0001782	10	0.954	1	0.18	1	B cell homeostasis	P
GO:0001816	92	0.0521	1	0.11	1	cytokine production	P
GO:0001822	63	0.805	1	0.579	1	kidney development	P
GO:0001824	37	0.00456	0.26	0.00185	0.197	blastocyst development	P
GO:0001825	17	0.0563	1	0.117	1	blastocyst formation	P
GO:0001829	14	0.0539	1	0.214	1	trophectodermal cell differentiation	P
GO:0001832	10	0.127	1	0.0222	0.894	blastocyst growth	P
GO:0001836	11	0.0325	1	0.0122	0.604	release of cytochrome c from mitochondria	P
GO:0001838	39	0.207	1	0.455	1	embryonic epithelial tube formation	P
GO:0001839	38	0.29	1	0.0902	1	neural plate morphogenesis	P
GO:0001841	35	0.273	1	0.226	1	neural tube formation	P
GO:0001843	26	0.351	1	0.154	1	neural tube closure	P
GO:0001871	75	0.712	1	0.219	1	pattern binding	F
GO:0001889	30	0.0483	1	0.0152	0.894	liver development	P
GO:0001890	34	0.000242	0.025	0.0879	1	placenta development	P
GO:0001892	16	0.0024	0.115	0.0344	1	embryonic placenta development	P
GO:0001894	40	0.589	1	0.0102	0.447	tissue homeostasis	P
GO:0001906	28	0.51	1	0.354	1	cell killing	P
GO:0001909	24	0.326	1	0.375	1	leukocyte mediated cytotoxicity	P
GO:0001910	18	0.581	1	0.739	1	regulation of leukocyte mediated cytotoxicity	P
GO:0001912	13	0.684	1	0.756	1	positive regulation of leukocyte mediated cytotoxicity	P
GO:0001932	65	0.231	1	0.0749	1	regulation of protein amino acid phosphorylation	P
GO:0001933	11	0.872	1	0.161	1	negative regulation of protein amino acid phosphorylation	P
GO:0001934	40	0.077	1	0.0615	1	positive regulation of protein amino acid phosphorylation	P
GO:0001935	30	0.318	1	0.298	1	endothelial cell proliferation	P
GO:0001936	25	0.476	1	0.745	1	regulation of endothelial cell proliferation	P
GO:0001937	17	0.373	1	0.632	1	negative regulation of endothelial cell proliferation	P
GO:0001942	35	0.0183	0.965	0.0821	1	hair follicle development	P
GO:0001944	201	0.289	1	0.337	1	vasculature development	P
GO:0001947	14	0.631	1	0.822	1	heart looping	P
GO:0001948	16	0.105	1	0.0931	1	glycoprotein binding	F
GO:0001952	18	0.618	1	0.324	1	regulation of cell-matrix adhesion	P
GO:0001963	11	0.466	1	1	1	synaptic transmission, dopaminergic	P
GO:0001974	17	0.983	1	0.486	1	blood vessel remodeling	P
GO:0001975	13	0.246	1	0.447	1	response to amphetamine	P
GO:0001976	21	0.354	1	0.996	1	fast regulation of arterial pressure	P
GO:0001990	17	0.36	1	0.999	1	regulation of blood pressure by hormones	P
GO:0002009	117	0.422	1	0.292	1	morphogenesis of an epithelium	P
GO:0002036	17	0.0444	1	0.207	1	regulation of L-glutamate transport	P
GO:0002037	16	0.0696	1	0.28	1	negative regulation of L-glutamate transport	P
GO:0002053	13	0.91	1	0.984	1	positive regulation of mesenchymal cell proliferation	P
GO:0002062	19	0.733	1	0.989	1	chondrocyte differentiation	P
GO:0002064	15	0.254	1	0.697	1	epithelial cell development	P
GO:0002076	11	0.593	1	0.217	1	osteoblast development	P
GO:0002088	10	0.833	1	0.5	1	lens development (sensu Vertebrata)	P
GO:0002200	25	0.246	1	0.0218	0.894	somatic diversification of immune receptors	P
GO:0002204	23	0.244	1	0.0167	0.894	somatic recombination of immunoglobulin genes during immune response	P
GO:0002208	23	0.244	1	0.0167	0.894	somatic diversification of immunoglobulins during immune response	P
GO:0002209	10	0.8	1	0.281	1	behavioral defense response	P
GO:0002217	364	0.454	1	0.384	1	physiological defense response	P
GO:0002228	15	0.683	1	0.436	1	natural killer cell mediated immunity	P
GO:0002245	408	0.326	1	0.223	1	physiological response to wounding	P
GO:0002250	130	0.0254	1	0.0221	0.894	adaptive immune response	P
GO:0002252	183	0.00286	0.118	0.017	0.894	immune effector process	P
GO:0002253	84	0.0474	1	0.0345	1	activation of immune response	P
GO:0002260	23	0.263	1	0.00952	0.447	lymphocyte homeostasis	P
GO:0002263	18	0.153	1	0.0271	1	cell activation during immune response	P
GO:0002274	45	0.00937	0.665	0.429	1	myeloid leukocyte activation	P
GO:0002285	17	0.293	1	0.0492	1	lymphocyte activation during immune response	P
GO:0002286	14	0.142	1	0.034	1	T cell activation during immune response	P
GO:0002292	11	0.182	1	0.0731	1	T cell differentiation during immune response	P
GO:0002293	11	0.182	1	0.0731	1	alpha-beta T cell differentiation during immune response	P
GO:0002294	11	0.182	1	0.0731	1	CD4-positive, alpha-beta T cell differentiation during immune response	P
GO:0002366	18	0.153	1	0.0271	1	leukocyte activation during immune response	P
GO:0002376	716	0.00518	0.26	0.0108	0.447	immune system process	P
GO:0002377	39	0.261	1	0.113	1	immunoglobulin production	P
GO:0002381	24	0.308	1	0.0204	0.894	immunoglobulin production during immune response	P
GO:0002429	33	0.503	1	0.0524	1	immune response-activating cell surface receptor signaling pathway	P
GO:0002437	55	0.216	1	0.315	1	inflammatory response to antigenic stimulus	P
GO:0002438	50	0.28	1	0.371	1	acute inflammatory response to antigenic stimulus	P
GO:0002440	44	0.303	1	0.111	1	production of molecular mediator of immune response	P
GO:0002443	136	0.0157	0.89	0.0356	1	leukocyte mediated immunity	P
GO:0002444	11	0.048	1	0.123	1	myeloid leukocyte mediated immunity	P
GO:0002449	128	0.0369	1	0.0537	1	lymphocyte mediated immunity	P
GO:0002455	18	0.316	1	0.509	1	humoral immune response mediated by circulating immunoglobulin	P
GO:0002456	16	0.0525	1	0.0504	1	T cell mediated immunity	P
GO:0002460	130	0.0254	1	0.0221	0.894	adaptive immune response (sensu Gnathostomata)	P
GO:0002474	17	0.342	1	0.323	1	antigen processing and presentation of peptide antigen via MHC class I	P
GO:0002478	15	0.0394	1	0.0845	1	antigen processing and presentation of exogenous peptide antigen	P
GO:0002495	10	0.0458	1	0.0658	1	antigen processing and presentation of peptide antigen via MHC class II	P
GO:0002504	13	0.0358	1	0.0181	0.894	antigen processing and presentation of peptide or polysaccharide antigen via MHC class II	P
GO:0002520	224	0.00027	0.025	0.000811	0.058	immune system development	P
GO:0002521	117	0.000479	0.0385	0.0118	0.604	leukocyte differentiation	P
GO:0002524	50	0.28	1	0.371	1	hypersensitivity	P
GO:0002526	124	0.131	1	0.332	1	acute inflammatory response	P
GO:0002541	48	0.0242	1	0.15	1	activation of plasma proteins during acute inflammatory response	P
GO:0002562	24	0.268	1	0.0175	0.894	somatic diversification of immune receptors via germline recombination within a single locus	P
GO:0002573	38	0.0196	0.965	0.666	1	myeloid leukocyte differentiation	P
GO:0002682	124	0.0162	0.89	0.0203	0.894	regulation of immune system process	P
GO:0002684	111	0.0327	1	0.0667	1	positive regulation of immune system process	P
GO:0002697	18	0.75	1	0.752	1	regulation of immune effector process	P
GO:0002699	18	0.75	1	0.752	1	positive regulation of immune effector process	P
GO:0002703	16	0.931	1	0.721	1	regulation of leukocyte mediated immunity	P
GO:0002705	16	0.931	1	0.721	1	positive regulation of leukocyte mediated immunity	P
GO:0002706	16	0.931	1	0.721	1	regulation of lymphocyte mediated immunity	P
GO:0002708	16	0.931	1	0.721	1	positive regulation of lymphocyte mediated immunity	P
GO:0002757	36	0.489	1	0.061	1	immune response-activating signal transduction	P
GO:0002761	20	0.0686	1	0.546	1	regulation of myeloid leukocyte differentiation	P
GO:0002764	39	0.521	1	0.0637	1	immune response-regulating signal transduction	P
GO:0002768	36	0.536	1	0.0552	1	immune response-regulating cell surface receptor signaling pathway	P
GO:0002790	47	0.541	1	0.251	1	peptide secretion	P
GO:0002819	19	0.581	1	0.26	1	regulation of adaptive immune response	P
GO:0002821	17	0.477	1	0.23	1	positive regulation of adaptive immune response	P
GO:0002822	19	0.581	1	0.26	1	regulation of adaptive immune response (sensu Gnathostomata)	P
GO:0002824	17	0.477	1	0.23	1	positive regulation of adaptive immune response (sensu Gnathostomata)	P
GO:0003674	16512	2.94e-12	0	3.22e-33	0	molecular_function	F
GO:0003676	3323	6.32e-24	0	1.86e-30	0	nucleic acid binding	F
GO:0003677	2020	9.51e-14	0	4.22e-13	0.000377	DNA binding	F
GO:0003678	22	0.00167	0.115	0.000434	0.034	DNA helicase activity	F
GO:0003682	114	0.00835	0.665	0.00442	0.246	chromatin binding	F
GO:0003684	26	0.0192	0.965	0.00348	0.197	damaged DNA binding	F
GO:0003690	42	0.097	1	0.0719	1	double-stranded DNA binding	F
GO:0003697	28	8.92e-06	0.003	0.000101	0.014	single-stranded DNA binding	F
GO:0003700	793	5.09e-05	0.013	0.0032	0.197	transcription factor activity	F
GO:0003702	72	0.0515	1	0.211	1	RNA polymerase II transcription factor activity	F
GO:0003705	16	0.387	1	0.591	1	RNA polymerase II transcription factor activity, enhancer binding	F
GO:0003707	53	0.0596	1	0.0205	0.894	steroid hormone receptor activity	F
GO:0003708	33	0.522	1	0.246	1	retinoic acid receptor activity	F
GO:0003712	123	0.0017	0.115	0.000483	0.034	transcription cofactor activity	F
GO:0003713	73	0.0344	1	0.00568	0.354	transcription coactivator activity	F
GO:0003714	42	0.0805	1	0.0503	1	transcription corepressor activity	F
GO:0003723	493	8.65e-15	0	5.17e-14	0.000377	RNA binding	F
GO:0003725	28	0.0128	0.89	0.00837	0.447	double-stranded RNA binding	F
GO:0003727	12	0.0515	1	0.104	1	single-stranded RNA binding	F
GO:0003729	36	0.0794	1	0.113	1	mRNA binding	F
GO:0003735	821	3.17e-06	0.002	0.307	1	structural constituent of ribosome	F
GO:0003743	67	0.00953	0.665	0.00508	0.25	translation initiation factor activity	F
GO:0003746	26	0.748	1	0.397	1	translation elongation factor activity	F
GO:0003755	39	0.0658	1	0.213	1	peptidyl-prolyl cis-trans isomerase activity	F
GO:0003774	146	1.61e-06	0.002	2.05e-05	0.007	motor activity	F
GO:0003777	78	0.000272	0.025	0.000227	0.016	microtubule motor activity	F
GO:0003779	227	0.00274	0.118	4.61e-05	0.008	actin binding	F
GO:0003796	10	0.588	1	0.503	1	lysozyme activity	F
GO:0003810	18	0.742	1	0.46	1	protein-glutamine gamma-glutamyltransferase activity	F
GO:0003823	22	1	1	0.959	1	antigen binding	F
GO:0003824	5696	2.85e-25	0	1.78e-42	0	catalytic activity	F
GO:0003854	13	0.607	1	0.708	1	3-beta-hydroxy-delta5-steroid dehydrogenase activity	F
GO:0003887	28	0.0392	1	0.578	1	DNA-directed DNA polymerase activity	F
GO:0003899	41	0.000187	0.025	0.00113	0.06	DNA-directed RNA polymerase activity	F
GO:0003909	10	0.293	1	0.914	1	DNA ligase activity	F
GO:0003910	10	0.293	1	0.914	1	DNA ligase (ATP) activity	F
GO:0003916	26	0.231	1	0.245	1	DNA topoisomerase activity	F
GO:0003917	10	0.375	1	0.0592	1	DNA topoisomerase type I activity	F
GO:0003918	19	0.205	1	0.424	1	DNA topoisomerase (ATP-hydrolyzing) activity	F
GO:0003924	201	0.0221	1	2.6e-05	0.007	GTPase activity	F
GO:0003950	17	0.0925	1	0.0213	0.894	NAD+ ADP-ribosyltransferase activity	F
GO:0003954	37	0.615	1	0.826	1	NADH dehydrogenase activity	F
GO:0003993	17	0.543	1	0.79	1	acid phosphatase activity	F
GO:0003995	13	0.068	1	0.379	1	acyl-CoA dehydrogenase activity	F
GO:0004003	13	0.0374	1	0.0159	0.894	ATP-dependent DNA helicase activity	F
GO:0004012	15	1	1	0.995	1	phospholipid-translocating ATPase activity	F
GO:0004022	25	0.965	1	0.498	1	alcohol dehydrogenase activity	F
GO:0004089	20	0.525	1	0.197	1	carbonate dehydratase activity	F
GO:0004091	12	0.583	1	0.694	1	carboxylesterase activity	F
GO:0004104	16	0.999	1	0.978	1	cholinesterase activity	F
GO:0004112	22	0.979	1	0.679	1	cyclic-nucleotide phosphodiesterase activity	F
GO:0004114	21	0.995	1	0.842	1	3',5'-cyclic-nucleotide phosphodiesterase activity	F
GO:0004129	38	0.000804	0.091	0.309	1	cytochrome-c oxidase activity	F
GO:0004143	16	0.433	1	0.936	1	diacylglycerol kinase activity	F
GO:0004175	499	0.101	1	0.0177	0.894	endopeptidase activity	F
GO:0004176	17	0.843	1	0.298	1	ATP-dependent peptidase activity	F
GO:0004177	40	0.673	1	0.68	1	aminopeptidase activity	F
GO:0004180	49	0.553	1	0.429	1	carboxypeptidase activity	F
GO:0004181	39	0.514	1	0.559	1	metallocarboxypeptidase activity	F
GO:0004182	38	0.455	1	0.481	1	carboxypeptidase A activity	F
GO:0004190	32	0.00701	0.665	3.43e-05	0.008	aspartic-type endopeptidase activity	F
GO:0004197	101	0.0641	1	0.0472	1	cysteine-type endopeptidase activity	F
GO:0004198	14	0.0377	1	0.0453	1	calpain activity	F
GO:0004221	63	0.00918	0.665	8.34e-06	0.00553	ubiquitin thiolesterase activity	F
GO:0004222	111	0.466	1	0.819	1	metalloendopeptidase activity	F
GO:0004252	226	0.673	1	0.153	1	serine-type endopeptidase activity	F
GO:0004289	28	0.494	1	0.115	1	subtilase activity	F
GO:0004298	31	0.173	1	0.363	1	threonine endopeptidase activity	F
GO:0004364	28	0.811	1	0.861	1	glutathione transferase activity	F
GO:0004365	131	1	1	1	1	glyceraldehyde-3-phosphate dehydrogenase (phosphorylating) activity	F
GO:0004383	10	0.561	1	0.739	1	guanylate cyclase activity	F
GO:0004386	133	1.32e-05	0.00481	8.46e-09	0.000885	helicase activity	F
GO:0004402	13	0.0294	1	0.000552	0.042	histone acetyltransferase activity	F
GO:0004407	18	0.0425	1	0.0886	1	histone deacetylase activity	F
GO:0004428	32	0.00223	0.115	0.000281	0.019	inositol or phosphatidylinositol kinase activity	F
GO:0004434	16	0.865	1	0.945	1	inositol or phosphatidylinositol phosphodiesterase activity	F
GO:0004435	16	0.865	1	0.945	1	phosphoinositide phospholipase C activity	F
GO:0004437	33	0.549	1	0.294	1	inositol or phosphatidylinositol phosphatase activity	F
GO:0004468	13	0.0294	1	0.000552	0.042	lysine N-acetyltransferase activity	F
GO:0004497	151	1	1	1	1	monooxygenase activity	F
GO:0004499	23	0.84	1	0.985	1	dimethylaniline monooxygenase (N-oxide-forming) activity	F
GO:0004518	147	0.000742	0.091	0.000177	0.016	nuclease activity	F
GO:0004519	90	0.00481	0.26	0.0228	0.894	endonuclease activity	F
GO:0004520	12	0.0113	0.89	0.0605	1	endodeoxyribonuclease activity	F
GO:0004521	42	0.23	1	0.28	1	endoribonuclease activity	F
GO:0004522	20	0.998	1	0.999	1	pancreatic ribonuclease activity	F
GO:0004527	46	0.0609	1	0.00819	0.447	exonuclease activity	F
GO:0004532	11	0.0671	1	0.0315	1	exoribonuclease activity	F
GO:0004536	17	0.0076	0.665	0.0127	0.604	deoxyribonuclease activity	F
GO:0004540	59	0.0938	1	0.0497	1	ribonuclease activity	F
GO:0004550	15	0.0515	1	0.066	1	nucleoside diphosphate kinase activity	F
GO:0004553	110	0.216	1	0.144	1	hydrolase activity, hydrolyzing O-glycosyl compounds	F
GO:0004601	54	0.0827	1	0.0777	1	peroxidase activity	F
GO:0004602	10	0.314	1	0.375	1	glutathione peroxidase activity	F
GO:0004620	64	0.105	1	0.0266	1	phospholipase activity	F
GO:0004623	35	0.0132	0.89	0.0251	1	phospholipase A2 activity	F
GO:0004629	20	0.824	1	0.987	1	phospholipase C activity	F
GO:0004634	16	0.982	1	0.754	1	phosphopyruvate hydratase activity	F
GO:0004659	12	0.231	1	0.36	1	prenyltransferase activity	F
GO:0004672	677	0.0104	0.665	1.32e-06	0.00295	protein kinase activity	F
GO:0004673	12	0.131	1	0.178	1	protein histidine kinase activity	F
GO:0004674	575	0.00197	0.115	1.89e-08	0.000925	protein serine/threonine kinase activity	F
GO:0004675	16	0.241	1	0.174	1	transmembrane receptor protein serine/threonine kinase activity	F
GO:0004680	27	0.00219	0.115	0.00246	0.197	casein kinase activity	F
GO:0004682	26	0.00181	0.115	0.00543	0.281	protein kinase CK2 activity	F
GO:0004683	28	0.932	1	0.193	1	calmodulin regulated protein kinase activity	F
GO:0004689	21	0.926	1	0.617	1	phosphorylase kinase activity	F
GO:0004693	17	0.00197	0.115	0.019	0.894	cyclin-dependent protein kinase activity	F
GO:0004697	12	0.0439	1	0.135	1	protein kinase C activity	F
GO:0004702	45	0.0153	0.89	0.00689	0.354	receptor signaling protein serine/threonine kinase activity	F
GO:0004707	21	0.0322	1	0.00365	0.197	MAP kinase activity	F
GO:0004713	568	0.0236	1	2.51e-06	0.005	protein-tyrosine kinase activity	F
GO:0004714	95	0.915	1	0.807	1	transmembrane receptor protein tyrosine kinase activity	F
GO:0004715	16	0.369	1	0.0485	1	non-membrane spanning protein tyrosine kinase activity	F
GO:0004721	141	0.0354	1	7.61e-05	0.01	phosphoprotein phosphatase activity	F
GO:0004722	20	0.0694	1	0.00112	0.06	protein serine/threonine phosphatase activity	F
GO:0004725	104	0.237	1	0.0181	0.894	protein tyrosine phosphatase activity	F
GO:0004743	10	0.89	1	0.826	1	pyruvate kinase activity	F
GO:0004806	14	0.175	1	0.246	1	triacylglycerol lipase activity	F
GO:0004812	80	0.00108	0.091	0.00285	0.197	aminoacyl-tRNA ligase activity	F
GO:0004835	14	0.127	1	0.18	1	tubulin-tyrosine ligase activity	F
GO:0004842	97	1.23e-07	0.000884	2.16e-07	0.00295	ubiquitin-protein ligase activity	F
GO:0004843	65	0.00433	0.26	7.82e-06	0.00553	ubiquitin-specific protease activity	F
GO:0004857	277	0.341	1	0.242	1	enzyme inhibitor activity	F
GO:0004859	18	0.0278	1	0.0374	1	phospholipase inhibitor activity	F
GO:0004860	18	0.0195	0.965	4.01e-05	0.008	protein kinase inhibitor activity	F
GO:0004864	15	0.882	1	0.437	1	protein phosphatase inhibitor activity	F
GO:0004866	175	0.998	1	0.999	1	endopeptidase inhibitor activity	F
GO:0004867	117	0.987	1	0.998	1	serine-type endopeptidase inhibitor activity	F
GO:0004869	37	0.986	1	0.967	1	cysteine protease inhibitor activity	F
GO:0004871	3217	1	1	1	1	signal transducer activity	F
GO:0004872	2927	1	1	1	1	receptor activity	F
GO:0004879	167	0.0861	1	0.0135	0.604	ligand-dependent nuclear receptor activity	F
GO:0004886	18	0.947	1	0.482	1	retinoid-X receptor activity	F
GO:0004887	18	0.0273	1	0.147	1	thyroid hormone receptor activity	F
GO:0004888	2427	1	1	1	1	transmembrane receptor activity	F
GO:0004889	17	0.0702	1	0.242	1	nicotinic acetylcholine-activated cation-selective channel activity	F
GO:0004890	28	1	1	1	1	GABA-A receptor activity	F
GO:0004896	64	0.951	1	0.991	1	hematopoietin/interferon-class (D200-domain) cytokine receptor activity	F
GO:0004907	46	0.961	1	0.988	1	interleukin receptor activity	F
GO:0004908	27	1	1	1	1	interleukin-1 receptor activity	F
GO:0004926	11	0.0632	1	0.137	1	non-G-protein coupled 7TM receptor activity	F
GO:0004930	2090	1	1	1	1	G-protein coupled receptor activity	F
GO:0004932	16	0.824	1	0.96	1	mating-type factor pheromone receptor activity	F
GO:0004935	47	0.829	1	0.928	1	adrenoceptor activity	F
GO:0004936	16	0.316	1	0.29	1	alpha-adrenergic receptor activity	F
GO:0004939	11	0.265	1	0.756	1	beta-adrenergic receptor activity	F
GO:0004942	15	0.511	1	0.482	1	anaphylatoxin receptor activity	F
GO:0004945	62	0.76	1	0.873	1	angiotensin type II receptor activity	F
GO:0004946	18	0.286	1	0.828	1	bombesin receptor activity	F
GO:0004947	30	0.453	1	0.267	1	bradykinin receptor activity	F
GO:0004949	134	1	1	1	1	cannabinoid receptor activity	F
GO:0004950	44	0.44	1	0.301	1	chemokine receptor activity	F
GO:0004952	52	0.246	1	0.37	1	dopamine receptor activity	F
GO:0004953	16	0.893	1	0.845	1	icosanoid receptor activity	F
GO:0004954	16	0.893	1	0.845	1	prostanoid receptor activity	F
GO:0004955	14	0.829	1	0.742	1	prostaglandin receptor activity	F
GO:0004960	10	0.964	1	0.997	1	thromboxane receptor activity	F
GO:0004963	10	0.989	1	0.998	1	follicle-stimulating hormone receptor activity	F
GO:0004965	75	1	1	1	1	GABA-B receptor activity	F
GO:0004966	33	0.311	1	0.387	1	galanin receptor activity	F
GO:0004969	39	0.0124	0.89	0.262	1	histamine receptor activity	F
GO:0004970	16	0.966	1	0.896	1	ionotropic glutamate receptor activity	F
GO:0004974	17	0.189	1	0.255	1	leukotriene receptor activity	F
GO:0004977	482	1	1	1	1	melanocortin receptor activity	F
GO:0004981	16	0.783	1	0.947	1	muscarinic acetylcholine receptor activity	F
GO:0004982	28	0.991	1	0.939	1	N-formyl peptide receptor activity	F
GO:0004983	86	0.945	1	1	1	neuropeptide Y receptor activity	F
GO:0004984	1197	1	1	1	1	olfactory receptor activity	F
GO:0004985	16	0.511	1	0.813	1	opioid receptor activity	F
GO:0004989	11	0.998	1	1	1	octopamine receptor activity	F
GO:0004990	12	0.809	1	0.982	1	oxytocin receptor activity	F
GO:0004992	22	0.777	1	0.162	1	platelet activating factor receptor activity	F
GO:0004994	16	0.402	1	0.953	1	somatostatin receptor activity	F
GO:0005000	15	0.951	1	0.994	1	vasopressin receptor activity	F
GO:0005003	12	0.996	1	1	1	ephrin receptor activity	F
GO:0005021	59	0.968	1	0.929	1	vascular endothelial growth factor receptor activity	F
GO:0005024	15	0.213	1	0.157	1	transforming growth factor beta receptor activity	F
GO:0005044	34	0.879	1	0.863	1	scavenger receptor activity	F
GO:0005057	89	0.0357	1	0.00593	0.354	receptor signaling protein activity	F
GO:0005083	194	0.00496	0.26	5.11e-07	0.00295	small GTPase regulator activity	F
GO:0005085	144	0.605	1	0.042	1	guanyl-nucleotide exchange factor activity	F
GO:0005086	16	0.654	1	0.116	1	ARF guanyl-nucleotide exchange factor activity	F
GO:0005088	74	0.0685	1	0.0106	0.447	Ras guanyl-nucleotide exchange factor activity	F
GO:0005089	68	0.202	1	0.0106	0.447	Rho guanyl-nucleotide exchange factor activity	F
GO:0005096	141	0.00463	0.26	6.35e-05	0.008	GTPase activator activity	F
GO:0005097	41	0.0503	1	0.0196	0.894	Rab GTPase activator activity	F
GO:0005099	59	0.00864	0.665	0.000855	0.06	Ras GTPase activator activity	F
GO:0005100	11	0.0243	1	0.00273	0.197	Rho GTPase activator activity	F
GO:0005102	720	0.312	1	0.0106	0.447	receptor binding	F
GO:0005125	206	0.979	1	0.911	1	cytokine activity	F
GO:0005126	46	0.99	1	0.686	1	hematopoietin/interferon-class (D200-domain) cytokine receptor binding	F
GO:0005149	12	1	1	1	1	interleukin-1 receptor binding	F
GO:0005154	10	0.307	1	0.406	1	epidermal growth factor receptor binding	F
GO:0005158	19	0.832	1	0.534	1	insulin receptor binding	F
GO:0005160	12	0.0346	1	0.0571	1	transforming growth factor beta receptor binding	F
GO:0005164	49	0.778	1	0.742	1	tumor necrosis factor receptor binding	F
GO:0005178	19	0.0299	1	0.0431	1	integrin binding	F
GO:0005179	176	0.772	1	0.684	1	hormone activity	F
GO:0005184	18	0.282	1	0.16	1	neuropeptide hormone activity	F
GO:0005198	1262	2.89e-05	0.00481	0.0493	1	structural molecule activity	F
GO:0005199	61	0.433	1	0.307	1	structural constituent of cell wall	F
GO:0005200	24	0.212	1	0.0663	1	structural constituent of cytoskeleton	F
GO:0005201	43	0.657	1	0.8	1	extracellular matrix structural constituent	F
GO:0005212	11	0.296	1	0.0531	1	structural constituent of eye lens	F
GO:0005215	1564	0.00294	0.118	0.000391	0.034	transporter activity	F
GO:0005216	435	0.137	1	0.264	1	ion channel activity	F
GO:0005217	13	0.484	1	0.273	1	intracellular ligand-gated ion channel activity	F
GO:0005230	65	0.814	1	0.993	1	extracellular ligand-gated ion channel activity	F
GO:0005231	42	0.203	1	0.643	1	excitatory extracellular ligand-gated ion channel activity	F
GO:0005234	18	0.99	1	0.966	1	glutamate-gated ion channel activity	F
GO:0005242	17	0.994	1	0.985	1	inward rectifier potassium channel activity	F
GO:0005244	255	0.0436	1	0.133	1	voltage-gated ion channel activity	F
GO:0005245	38	0.177	1	0.178	1	voltage-gated calcium channel activity	F
GO:0005246	16	0.305	1	0.326	1	calcium channel regulator activity	F
GO:0005247	20	0.0146	0.89	0.0209	0.894	voltage-gated chloride channel activity	F
GO:0005248	16	0.342	1	0.786	1	voltage-gated sodium channel activity	F
GO:0005249	193	0.253	1	0.503	1	voltage-gated potassium channel activity	F
GO:0005253	67	0.5	1	0.543	1	anion channel activity	F
GO:0005254	57	0.436	1	0.647	1	chloride channel activity	F
GO:0005261	316	0.0351	1	0.122	1	cation channel activity	F
GO:0005262	77	0.0595	1	0.0213	0.894	calcium channel activity	F
GO:0005267	214	0.444	1	0.627	1	potassium channel activity	F
GO:0005272	32	0.231	1	0.47	1	sodium channel activity	F
GO:0005275	66	0.735	1	0.186	1	amine transporter activity	F
GO:0005279	23	0.96	1	0.645	1	amino acid-polyamine transporter activity	F
GO:0005283	16	0.954	1	0.844	1	sodium:amino acid symporter activity	F
GO:0005310	70	0.239	1	0.711	1	dicarboxylic acid transporter activity	F
GO:0005319	47	0.22	1	0.188	1	lipid transporter activity	F
GO:0005326	29	0.989	1	0.631	1	neurotransmitter transporter activity	F
GO:0005328	26	1	1	0.723	1	neurotransmitter:sodium symporter activity	F
GO:0005337	12	0.44	1	0.504	1	nucleoside transporter activity	F
GO:0005342	133	0.542	1	0.554	1	organic acid transporter activity	F
GO:0005343	88	0.649	1	0.715	1	organic acid:sodium symporter activity	F
GO:0005344	13	0.51	1	0.821	1	oxygen transporter activity	F
GO:0005351	53	0.098	1	0.0212	0.894	sugar porter activity	F
GO:0005355	11	0.0425	1	0.0241	1	glucose transporter activity	F
GO:0005385	10	0.0825	1	0.0438	1	zinc ion transporter activity	F
GO:0005386	419	0.0605	1	0.0439	1	carrier activity	F
GO:0005391	10	0.937	1	0.289	1	sodium:potassium-exchanging ATPase activity	F
GO:0005416	19	0.894	1	0.742	1	cation:amino acid symporter activity	F
GO:0005451	14	0.0865	1	0.259	1	monovalent cation:proton antiporter activity	F
GO:0005452	13	0.117	1	0.0491	1	inorganic anion exchanger activity	F
GO:0005478	22	0.0131	0.89	0.00323	0.197	intracellular transporter activity	F
GO:0005484	16	0.0454	1	0.058	1	SNAP receptor activity	F
GO:0005488	12133	3.11e-40	0	0	0	binding	F
GO:0005496	67	0.321	1	0.428	1	steroid binding	F
GO:0005501	12	0.483	1	0.319	1	retinoid binding	F
GO:0005504	30	0.135	1	0.068	1	fatty acid binding	F
GO:0005506	314	0.54	1	0.905	1	iron ion binding	F
GO:0005507	76	0.847	1	0.865	1	copper ion binding	F
GO:0005509	875	0.35	1	0.0788	1	calcium ion binding	F
GO:0005515	5996	0	0	0	0	protein binding	F
GO:0005516	100	0.519	1	0.181	1	calmodulin binding	F
GO:0005520	24	0.915	1	0.738	1	insulin-like growth factor binding	F
GO:0005524	1499	1.42e-15	0	6.45e-23	0	ATP binding	F
GO:0005525	365	2.35e-06	0.002	2.13e-09	0.000377	GTP binding	F
GO:0005529	215	1	1	0.997	1	sugar binding	F
GO:0005537	13	0.906	1	0.654	1	mannose binding	F
GO:0005539	61	0.732	1	0.164	1	glycosaminoglycan binding	F
GO:0005540	15	0.3	1	0.538	1	hyaluronic acid binding	F
GO:0005543	165	0.000335	0.0385	1.27e-06	0.00295	phospholipid binding	F
GO:0005544	25	0.082	1	0.203	1	calcium-dependent phospholipid binding	F
GO:0005548	18	0.986	1	0.926	1	phospholipid transporter activity	F
GO:0005549	22	1	1	1	1	odorant binding	F
GO:0005550	19	1	1	1	1	pheromone binding	F
GO:0005575	13810	7.86e-19	0	6.17e-27	0	cellular_component	C
GO:0005576	1193	0.942	1	0.956	1	extracellular region	C
GO:0005578	205	0.416	1	0.657	1	extracellular matrix (sensu Metazoa)	C
GO:0005581	20	1	1	0.958	1	collagen	C
GO:0005604	50	0.61	1	0.533	1	basement membrane	C
GO:0005605	23	0.674	1	0.721	1	basal lamina	C
GO:0005615	296	0.181	1	0.145	1	extracellular space	C
GO:0005622	8951	0	0	0	0	intracellular	C
GO:0005623	13087	1.62e-23	0	1.66e-33	0	cell	C
GO:0005624	406	0.0851	1	0.0177	0.894	membrane fraction	C
GO:0005625	91	0.000557	0.0385	0.000522	0.034	soluble fraction	C
GO:0005626	17	0.0275	1	0.0154	0.894	insoluble fraction	C
GO:0005634	3649	0	0	0	0	nucleus	C
GO:0005635	129	8.74e-05	0.013	6.34e-09	0.000885	nuclear envelope	C
GO:0005637	13	0.0882	1	0.0214	0.894	nuclear inner membrane	C
GO:0005643	49	8.29e-06	0.003	6.53e-06	0.00553	nuclear pore	C
GO:0005654	323	3.04e-14	0	3.22e-13	0.000377	nucleoplasm	C
GO:0005657	27	3.41e-05	0.00481	0.000953	0.06	replication fork	C
GO:0005667	183	3.48e-05	0.00481	1.16e-05	0.00553	transcription factor complex	C
GO:0005669	15	0.00722	0.665	0.169	1	transcription factor TFIID complex	C
GO:0005681	64	4.34e-06	0.003	1.24e-06	0.00295	spliceosome complex	C
GO:0005694	511	0.000367	0.0385	0.0158	0.894	chromosome	C
GO:0005720	16	0.247	1	0.0686	1	nuclear heterochromatin	C
GO:0005730	161	7.31e-08	0.000884	2.98e-05	0.008	nucleolus	C
GO:0005737	5325	0	0	0	0	cytoplasm	C
GO:0005739	827	8.37e-19	0	3.19e-14	0.000377	mitochondrion	C
GO:0005740	346	2.74e-08	0.000884	1.27e-05	0.007	mitochondrial envelope	C
GO:0005741	52	0.0509	1	0.000774	0.058	mitochondrial outer membrane	C
GO:0005743	250	8.59e-06	0.003	0.0014	0.0938	mitochondrial inner membrane	C
GO:0005746	36	0.544	1	0.735	1	mitochondrial electron transport chain	C
GO:0005758	25	0.0318	1	0.0551	1	mitochondrial intermembrane space	C
GO:0005759	108	0.00153	0.115	0.000286	0.019	mitochondrial matrix	C
GO:0005761	20	0.0193	0.965	0.0689	1	mitochondrial ribosome	C
GO:0005762	10	0.137	1	0.465	1	mitochondrial large ribosomal subunit	C
GO:0005764	125	4.87e-05	0.013	0.00115	0.06	lysosome	C
GO:0005765	23	0.0183	0.965	0.00299	0.197	lysosomal membrane	C
GO:0005768	116	8.87e-06	0.003	5.5e-08	0.000942	endosome	C
GO:0005769	35	0.00295	0.118	0.0019	0.197	early endosome	C
GO:0005770	31	3.32e-05	0.00481	0.000702	0.058	late endosome	C
GO:0005773	142	5.89e-06	0.003	0.000614	0.042	vacuole	C
GO:0005774	31	0.00315	0.186	0.00121	0.06	vacuolar membrane	C
GO:0005777	73	0.00861	0.665	0.0322	1	peroxisome	C
GO:0005778	30	0.0103	0.665	0.0619	1	peroxisomal membrane	C
GO:0005783	595	8.83e-06	0.003	4.43e-07	0.00295	endoplasmic reticulum	C
GO:0005788	35	0.0178	0.89	0.0164	0.894	endoplasmic reticulum lumen	C
GO:0005789	267	0.000247	0.025	4.77e-05	0.008	endoplasmic reticulum membrane	C
GO:0005791	16	0.355	1	0.256	1	rough endoplasmic reticulum	C
GO:0005792	164	0.705	1	0.34	1	microsome	C
GO:0005793	18	0.0306	1	0.00269	0.197	ER-Golgi intermediate compartment	C
GO:0005794	479	5.07e-09	0.000884	1.53e-13	0.000377	Golgi apparatus	C
GO:0005795	17	0.0525	1	0.13	1	Golgi stack	C
GO:0005798	35	0.0199	0.965	2.51e-05	0.007	Golgi-associated vesicle	C
GO:0005801	10	0.0521	1	0.00496	0.25	Golgi cis face	C
GO:0005802	24	0.0967	1	0.0608	1	Golgi trans face	C
GO:0005813	94	0.00166	0.115	0.000242	0.019	centrosome	C
GO:0005815	109	0.00112	0.091	0.00065	0.044	microtubule organizing center	C
GO:0005819	63	0.000147	0.025	0.000759	0.058	spindle	C
GO:0005829	390	4.38e-10	0	1.26e-08	0.000885	cytosol	C
GO:0005833	13	0.458	1	0.541	1	hemoglobin complex	C
GO:0005834	21	0.237	1	0.779	1	heterotrimeric G-protein complex	C
GO:0005839	31	0.173	1	0.363	1	proteasome core complex (sensu Eukaryota)	C
GO:0005840	842	1.12e-06	0.002	0.227	1	ribosome	C
GO:0005856	860	1.07e-09	0.000884	1.53e-17	0.000377	cytoskeleton	C
GO:0005874	141	5.68e-08	0.000884	5.59e-08	0.000942	microtubule	C
GO:0005875	93	7.54e-06	0.003	1.76e-05	0.007	microtubule associated complex	C
GO:0005876	14	0.015	0.89	0.0308	1	spindle microtubule	C
GO:0005882	93	0.997	1	0.994	1	intermediate filament	C
GO:0005884	26	0.00779	0.665	0.0099	0.447	actin filament	C
GO:0005886	1846	0.00186	0.115	3.81e-06	0.00553	plasma membrane	C
GO:0005887	338	0.625	1	0.303	1	integral to plasma membrane	C
GO:0005891	26	0.649	1	0.467	1	voltage-gated calcium channel complex	C
GO:0005892	12	0.44	1	0.768	1	nicotinic acetylcholine-gated receptor-channel complex	C
GO:0005901	33	0.0986	1	0.00613	0.354	caveola	C
GO:0005902	17	0.12	1	0.114	1	microvillus	C
GO:0005903	22	0.477	1	0.0643	1	brush border	C
GO:0005905	25	0.165	1	0.000111	0.014	coated pit	C
GO:0005911	143	0.000141	0.025	0.0223	0.894	intercellular junction	C
GO:0005912	81	0.0267	1	0.205	1	adherens junction	C
GO:0005913	24	0.0284	1	0.0828	1	cell-cell adherens junction	C
GO:0005921	27	0.077	1	0.191	1	gap junction	C
GO:0005922	21	0.0594	1	0.448	1	connexon complex	C
GO:0005923	70	0.00365	0.186	0.131	1	tight junction	C
GO:0005924	56	0.0955	1	0.719	1	cell-substrate adherens junction	C
GO:0005925	53	0.0969	1	0.809	1	focal adhesion	C
GO:0005929	56	0.203	1	0.00355	0.197	cilium	C
GO:0005930	12	0.443	1	0.174	1	axoneme	C
GO:0005932	12	0.671	1	0.841	1	basal body	C
GO:0005938	60	0.0232	1	0.00035	0.034	cell cortex	C
GO:0005941	48	0.924	1	0.545	1	unlocalized protein complex	C
GO:0005942	17	0.389	1	0.0627	1	phosphoinositide 3-kinase complex	C
GO:0005952	19	0.604	1	0.148	1	cAMP-dependent protein kinase complex	C
GO:0005964	21	0.926	1	0.617	1	phosphorylase kinase complex	C
GO:0005975	619	0.477	1	0.455	1	carbohydrate metabolism	P
GO:0005976	78	0.947	1	0.658	1	polysaccharide metabolism	P
GO:0005977	49	0.893	1	0.338	1	glycogen metabolism	P
GO:0005978	33	0.932	1	0.351	1	glycogen biosynthesis	P
GO:0005996	301	0.915	1	0.872	1	monosaccharide metabolism	P
GO:0006006	265	0.989	1	0.966	1	glucose metabolism	P
GO:0006007	219	0.995	1	0.997	1	glucose catabolism	P
GO:0006022	24	0.33	1	0.408	1	aminoglycan metabolism	P
GO:0006023	11	0.594	1	0.244	1	aminoglycan biosynthesis	P
GO:0006024	11	0.594	1	0.244	1	glycosaminoglycan biosynthesis	P
GO:0006029	21	0.819	1	0.908	1	proteoglycan metabolism	P
GO:0006030	11	0.999	1	0.852	1	chitin metabolism	P
GO:0006040	27	0.986	1	0.511	1	amino sugar metabolism	P
GO:0006041	23	0.951	1	0.543	1	glucosamine metabolism	P
GO:0006044	23	0.951	1	0.543	1	N-acetylglucosamine metabolism	P
GO:0006066	465	0.445	1	0.383	1	alcohol metabolism	P
GO:0006071	29	0.339	1	0.0863	1	glycerol metabolism	P
GO:0006072	18	0.659	1	0.25	1	glycerol-3-phosphate metabolism	P
GO:0006073	49	0.893	1	0.338	1	glucan metabolism	P
GO:0006081	12	0.167	1	0.418	1	aldehyde metabolism	P
GO:0006082	556	1.42e-05	0.00481	7.89e-08	0.000966	organic acid metabolism	P
GO:0006084	24	0.0118	0.89	0.00636	0.354	acetyl-CoA metabolism	P
GO:0006090	27	0.716	1	0.016	0.894	pyruvate metabolism	P
GO:0006091	858	0.307	1	0.671	1	generation of precursor metabolites and energy	P
GO:0006092	262	0.98	1	0.959	1	main pathways of carbohydrate metabolism	P
GO:0006094	23	0.668	1	0.047	1	gluconeogenesis	P
GO:0006096	210	1	1	1	1	glycolysis	P
GO:0006099	19	0.0087	0.665	0.0355	1	tricarboxylic acid cycle	P
GO:0006100	25	0.983	1	0.512	1	tricarboxylic acid cycle intermediate metabolism	P
GO:0006109	14	0.978	1	0.325	1	regulation of carbohydrate metabolism	P
GO:0006112	51	0.878	1	0.342	1	energy reserve metabolism	P
GO:0006118	495	0.139	1	0.715	1	electron transport	P
GO:0006119	84	0.00563	0.286	0.00685	0.354	oxidative phosphorylation	P
GO:0006120	13	0.403	1	0.58	1	mitochondrial electron transport, NADH to ubiquinone	P
GO:0006122	10	0.302	1	0.115	1	mitochondrial electron transport, ubiquinol to cytochrome c	P
GO:0006139	3113	9.09e-33	0	3.53e-36	0	nucleobase, nucleoside, nucleotide and nucleic acid metabolism	P
GO:0006140	18	0.116	1	0.0307	1	regulation of nucleotide metabolism	P
GO:0006163	104	3.06e-05	0.00481	2.23e-06	0.005	purine nucleotide metabolism	P
GO:0006164	92	0.000131	0.025	5.51e-05	0.008	purine nucleotide biosynthesis	P
GO:0006171	15	0.255	1	0.0802	1	cAMP biosynthesis	P
GO:0006182	13	0.512	1	0.702	1	cGMP biosynthesis	P
GO:0006183	15	0.0515	1	0.066	1	GTP biosynthesis	P
GO:0006206	12	0.176	1	0.0645	1	pyrimidine base metabolism	P
GO:0006213	10	0.343	1	0.31	1	pyrimidine nucleoside metabolism	P
GO:0006220	30	0.0232	1	0.0251	1	pyrimidine nucleotide metabolism	P
GO:0006221	25	0.0101	0.665	0.0335	1	pyrimidine nucleotide biosynthesis	P
GO:0006228	15	0.0515	1	0.066	1	UTP biosynthesis	P
GO:0006241	15	0.0515	1	0.066	1	CTP biosynthesis	P
GO:0006259	688	2.45e-09	0.000884	3.21e-09	0.000377	DNA metabolism	P
GO:0006260	156	4.11e-05	0.00481	7.49e-05	0.01	DNA replication	P
GO:0006261	81	0.00104	0.091	8.07e-05	0.01	DNA-dependent DNA replication	P
GO:0006265	28	0.192	1	0.288	1	DNA topological change	P
GO:0006268	14	0.0801	1	0.0646	1	DNA unwinding during replication	P
GO:0006270	25	0.095	1	0.142	1	DNA replication initiation	P
GO:0006275	31	0.00233	0.115	0.00646	0.354	regulation of DNA replication	P
GO:0006281	187	1.08e-07	0.000884	8.15e-10	0.000377	DNA repair	P
GO:0006284	21	0.00517	0.26	0.105	1	base-excision repair	P
GO:0006289	23	0.004	0.199	0.047	1	nucleotide-excision repair	P
GO:0006298	13	0.302	1	0.0109	0.447	mismatch repair	P
GO:0006302	31	0.0263	1	0.00058	0.042	double-strand break repair	P
GO:0006304	33	1	1	0.952	1	DNA modification	P
GO:0006305	31	1	1	0.937	1	DNA alkylation	P
GO:0006306	31	1	1	0.937	1	DNA methylation	P
GO:0006308	19	0.00678	0.665	0.00889	0.447	DNA catabolism	P
GO:0006309	11	0.0474	1	0.112	1	DNA fragmentation during apoptosis	P
GO:0006310	68	0.00204	0.115	0.000295	0.019	DNA recombination	P
GO:0006323	290	0.00541	0.286	0.0136	0.604	DNA packaging	P
GO:0006325	290	0.00541	0.286	0.0136	0.604	establishment and/or maintenance of chromatin architecture	P
GO:0006333	218	0.0761	1	0.32	1	chromatin assembly or disassembly	P
GO:0006334	167	0.47	1	0.976	1	nucleosome assembly	P
GO:0006338	33	3.74e-05	0.00481	6.59e-06	0.00553	chromatin remodeling	P
GO:0006342	13	0.00715	0.665	0.00438	0.246	chromatin silencing	P
GO:0006350	1945	6.83e-14	0	5.33e-17	0.000377	transcription	P
GO:0006351	1684	8.12e-10	0	4.84e-12	0.000377	transcription, DNA-dependent	P
GO:0006352	48	0.000191	0.025	0.000772	0.058	transcription initiation	P
GO:0006355	1653	3.14e-09	0.000884	1.91e-11	0.000377	regulation of transcription, DNA-dependent	P
GO:0006357	411	6.77e-05	0.013	0.00494	0.25	regulation of transcription from RNA polymerase II promoter	P
GO:0006364	39	0.0154	0.89	0.0875	1	rRNA processing	P
GO:0006366	438	6.58e-05	0.013	0.00466	0.25	transcription from RNA polymerase II promoter	P
GO:0006367	18	0.0257	1	0.0632	1	transcription initiation from RNA polymerase II promoter	P
GO:0006396	252	9e-12	0	4.98e-11	0.000377	RNA processing	P
GO:0006397	118	2.2e-09	0.000884	4.23e-08	0.000925	mRNA processing	P
GO:0006399	119	4.05e-05	0.00481	0.00229	0.197	tRNA metabolism	P
GO:0006400	11	0.0896	1	0.467	1	tRNA modification	P
GO:0006401	14	0.0142	0.89	0.00259	0.197	RNA catabolism	P
GO:0006402	11	0.0272	1	0.0105	0.447	mRNA catabolism	P
GO:0006403	42	0.000829	0.091	4.43e-05	0.008	RNA localization	P
GO:0006405	17	0.00193	0.115	0.00363	0.197	RNA export from nucleus	P
GO:0006406	13	0.00393	0.199	0.00173	0.095	mRNA export from nucleus	P
GO:0006412	1218	6.34e-10	0	0.00124	0.06	protein biosynthesis	P
GO:0006413	64	0.0166	0.89	0.0423	1	translational initiation	P
GO:0006414	38	0.424	1	0.372	1	translational elongation	P
GO:0006417	119	0.101	1	0.0236	0.894	regulation of protein biosynthesis	P
GO:0006418	74	0.000548	0.0385	0.00433	0.246	tRNA aminoacylation for protein translation	P
GO:0006445	32	0.0399	1	0.0879	1	regulation of translation	P
GO:0006446	25	0.0551	1	0.115	1	regulation of translational initiation	P
GO:0006457	177	4.96e-06	0.003	0.00101	0.06	protein folding	P
GO:0006461	381	0.0129	0.89	0.0111	0.447	protein complex assembly	P
GO:0006464	1527	3.47e-14	0	3.15e-29	0	protein modification	P
GO:0006468	730	0.0132	0.89	2.03e-07	0.00295	protein amino acid phosphorylation	P
GO:0006469	42	0.0581	1	0.000267	0.019	negative regulation of protein kinase activity	P
GO:0006470	127	0.112	1	0.000528	0.034	protein amino acid dephosphorylation	P
GO:0006471	15	0.000223	0.025	0.121	1	protein amino acid ADP-ribosylation	P
GO:0006473	11	0.0173	0.89	0.00785	0.423	protein amino acid acetylation	P
GO:0006476	17	0.0665	1	0.0965	1	protein amino acid deacetylation	P
GO:0006479	22	0.0305	1	0.00869	0.447	protein amino acid methylation	P
GO:0006486	65	0.0666	1	0.0436	1	protein amino acid glycosylation	P
GO:0006487	14	0.0208	1	0.00141	0.0938	protein amino acid N-linked glycosylation	P
GO:0006497	31	0.0668	1	0.234	1	protein amino acid lipidation	P
GO:0006505	18	0.0949	1	0.282	1	GPI anchor metabolism	P
GO:0006506	13	0.252	1	0.402	1	GPI anchor biosynthesis	P
GO:0006508	860	0.000206	0.025	3.84e-07	0.00295	proteolysis	P
GO:0006509	10	0.463	1	0.127	1	membrane protein ectodomain proteolysis	P
GO:0006511	162	6.99e-05	0.013	1.35e-08	0.000885	ubiquitin-dependent protein catabolism	P
GO:0006512	343	6.47e-13	0	2.5e-21	0.000377	ubiquitin cycle	P
GO:0006515	11	0.0292	1	8.68e-07	0.00295	misfolded or incompletely synthesized protein catabolism	P
GO:0006516	11	0.333	1	0.121	1	glycoprotein catabolism	P
GO:0006518	15	0.746	1	0.925	1	peptide metabolism	P
GO:0006519	414	3.1e-05	0.00481	4.1e-05	0.008	amino acid and derivative metabolism	P
GO:0006520	334	2.15e-05	0.00481	1.94e-06	0.005	amino acid metabolism	P
GO:0006521	65	0.231	1	0.0749	1	regulation of amino acid metabolism	P
GO:0006525	11	0.0447	1	0.0503	1	arginine metabolism	P
GO:0006536	12	0.0436	1	0.152	1	glutamate metabolism	P
GO:0006541	16	0.156	1	0.00027	0.019	glutamine metabolism	P
GO:0006544	12	0.688	1	0.0847	1	glycine metabolism	P
GO:0006547	11	0.72	1	0.684	1	histidine metabolism	P
GO:0006560	10	0.347	1	0.218	1	proline metabolism	P
GO:0006575	140	0.196	1	0.227	1	amino acid derivative metabolism	P
GO:0006576	80	0.763	1	0.828	1	biogenic amine metabolism	P
GO:0006582	10	0.695	1	0.359	1	melanin metabolism	P
GO:0006584	31	0.697	1	0.667	1	catecholamine metabolism	P
GO:0006586	11	0.879	1	0.424	1	indolalkylamine metabolism	P
GO:0006595	18	0.248	1	0.329	1	polyamine metabolism	P
GO:0006596	15	0.241	1	0.342	1	polyamine biosynthesis	P
GO:0006605	155	2.73e-06	0.002	1.44e-05	0.007	protein targeting	P
GO:0006606	70	0.00128	0.096	0.000231	0.016	protein import into nucleus	P
GO:0006611	11	0.00324	0.186	0.00535	0.281	protein export from nucleus	P
GO:0006612	18	0.235	1	0.787	1	protein targeting to membrane	P
GO:0006613	14	0.198	1	0.876	1	cotranslational protein targeting to membrane	P
GO:0006614	12	0.112	1	0.782	1	SRP-dependent cotranslational protein targeting to membrane	P
GO:0006626	11	0.0372	1	0.0201	0.894	protein targeting to mitochondrion	P
GO:0006629	610	6.24e-05	0.013	4.34e-08	0.000925	lipid metabolism	P
GO:0006631	148	0.0157	0.89	0.0231	0.894	fatty acid metabolism	P
GO:0006633	59	0.0624	1	0.0782	1	fatty acid biosynthesis	P
GO:0006635	17	0.123	1	0.0317	1	fatty acid beta-oxidation	P
GO:0006638	33	0.12	1	0.012	0.604	neutral lipid metabolism	P
GO:0006639	31	0.0924	1	0.01	0.447	acylglycerol metabolism	P
GO:0006641	28	0.0717	1	0.00785	0.423	triacylglycerol metabolism	P
GO:0006643	157	2.55e-07	0.000884	5.09e-07	0.00295	membrane lipid metabolism	P
GO:0006644	134	3.15e-05	0.00481	1.03e-05	0.00553	phospholipid metabolism	P
GO:0006650	63	0.00107	0.091	3.47e-05	0.008	glycerophospholipid metabolism	P
GO:0006662	33	0.0428	1	0.00741	0.354	glycerol ether metabolism	P
GO:0006664	11	0.00272	0.118	0.0782	1	glycolipid metabolism	P
GO:0006665	36	4.87e-06	0.003	0.00524	0.281	sphingolipid metabolism	P
GO:0006672	21	8.36e-06	0.003	0.00899	0.447	ceramide metabolism	P
GO:0006690	32	0.443	1	0.478	1	icosanoid metabolism	P
GO:0006691	20	0.396	1	0.424	1	leukotriene metabolism	P
GO:0006692	11	0.447	1	0.521	1	prostanoid metabolism	P
GO:0006693	11	0.447	1	0.521	1	prostaglandin metabolism	P
GO:0006694	73	0.339	1	0.369	1	steroid biosynthesis	P
GO:0006695	20	0.947	1	0.68	1	cholesterol biosynthesis	P
GO:0006700	10	0.283	1	0.949	1	C21-steroid hormone biosynthesis	P
GO:0006706	11	0.152	1	0.138	1	steroid catabolism	P
GO:0006720	36	0.848	1	0.41	1	isoprenoid metabolism	P
GO:0006725	161	0.0631	1	0.00529	0.281	aromatic compound metabolism	P
GO:0006730	116	0.672	1	0.0548	1	one-carbon compound metabolism	P
GO:0006732	164	4.08e-08	0.000884	6.97e-06	0.00553	coenzyme metabolism	P
GO:0006733	30	1.31e-05	0.00481	0.0176	0.894	oxidoreduction coenzyme metabolism	P
GO:0006739	12	9.48e-06	0.003	0.0226	0.894	NADP metabolism	P
GO:0006749	21	0.0145	0.89	0.0919	1	glutathione metabolism	P
GO:0006752	77	0.00168	0.115	0.0145	0.894	group transfer coenzyme metabolism	P
GO:0006753	51	0.0047	0.26	0.0123	0.604	nucleoside phosphate metabolism	P
GO:0006754	51	0.0047	0.26	0.0123	0.604	ATP biosynthesis	P
GO:0006760	15	0.0617	1	0.243	1	folic acid and derivative metabolism	P
GO:0006766	66	0.142	1	0.101	1	vitamin metabolism	P
GO:0006767	44	0.00702	0.665	0.0983	1	water-soluble vitamin metabolism	P
GO:0006769	21	2.81e-05	0.00481	0.0251	1	nicotinamide metabolism	P
GO:0006775	21	0.973	1	0.5	1	fat-soluble vitamin metabolism	P
GO:0006776	17	0.99	1	0.351	1	vitamin A metabolism	P
GO:0006778	19	0.0122	0.89	0.0984	1	porphyrin metabolism	P
GO:0006779	14	0.0432	1	0.185	1	porphyrin biosynthesis	P
GO:0006783	10	0.0779	1	0.21	1	heme biosynthesis	P
GO:0006790	64	0.0301	1	0.14	1	sulfur metabolism	P
GO:0006793	1005	6.66e-05	0.013	2.91e-14	0.000377	phosphorus metabolism	P
GO:0006796	1005	6.66e-05	0.013	2.91e-14	0.000377	phosphate metabolism	P
GO:0006800	144	0.000921	0.091	3.6e-05	0.008	oxygen and reactive oxygen species metabolism	P
GO:0006801	22	0.81	1	0.35	1	superoxide metabolism	P
GO:0006805	13	0.477	1	0.338	1	xenobiotic metabolism	P
GO:0006807	499	0.000162	0.025	0.000212	0.016	nitrogen compound metabolism	P
GO:0006809	23	0.821	1	0.15	1	nitric oxide biosynthesis	P
GO:0006810	2705	4.18e-15	0	1.16e-20	0.000377	transport	P
GO:0006811	879	0.00334	0.186	0.0412	1	ion transport	P
GO:0006812	616	0.000273	0.025	0.00301	0.197	cation transport	P
GO:0006813	255	0.165	1	0.147	1	potassium ion transport	P
GO:0006814	112	0.227	1	0.454	1	sodium ion transport	P
GO:0006816	138	0.066	1	0.053	1	calcium ion transport	P
GO:0006817	84	0.946	1	0.93	1	phosphate transport	P
GO:0006818	88	0.0397	1	0.0843	1	hydrogen transport	P
GO:0006820	204	0.694	1	0.857	1	anion transport	P
GO:0006821	76	0.492	1	0.855	1	chloride transport	P
GO:0006825	11	0.207	1	0.18	1	copper ion transport	P
GO:0006826	28	0.0309	1	0.129	1	iron ion transport	P
GO:0006829	14	0.014	0.89	0.00642	0.354	zinc ion transport	P
GO:0006835	70	0.239	1	0.711	1	dicarboxylic acid transport	P
GO:0006836	58	0.947	1	0.74	1	neurotransmitter transport	P
GO:0006839	45	0.046	1	0.00598	0.354	mitochondrial transport	P
GO:0006865	77	0.0387	1	0.0129	0.604	amino acid transport	P
GO:0006869	85	0.261	1	0.16	1	lipid transport	P
GO:0006873	165	0.0692	1	0.0378	1	cell ion homeostasis	P
GO:0006874	82	0.103	1	0.0623	1	calcium ion homeostasis	P
GO:0006875	149	0.187	1	0.109	1	metal ion homeostasis	P
GO:0006879	54	0.695	1	0.729	1	iron ion homeostasis	P
GO:0006885	30	0.00659	0.665	0.073	1	regulation of pH	P
GO:0006886	437	7.14e-14	0	5.42e-20	0.000377	intracellular protein transport	P
GO:0006887	88	0.000179	0.025	0.000193	0.016	exocytosis	P
GO:0006888	22	0.164	1	0.0129	0.604	ER to Golgi vesicle-mediated transport	P
GO:0006897	137	0.00241	0.115	1.18e-07	0.00295	endocytosis	P
GO:0006898	25	0.357	1	0.0199	0.894	receptor mediated endocytosis	P
GO:0006904	17	0.00361	0.186	0.0307	1	vesicle docking during exocytosis	P
GO:0006906	10	0.153	1	0.121	1	vesicle fusion	P
GO:0006909	35	0.0215	1	0.0284	1	phagocytosis	P
GO:0006913	211	3.81e-08	0.000884	1.65e-11	0.000377	nucleocytoplasmic transport	P
GO:0006914	17	0.0904	1	0.0179	0.894	autophagy	P
GO:0006915	601	1.27e-10	0	8.29e-13	0.000377	apoptosis	P
GO:0006916	97	0.00263	0.118	0.00374	0.197	anti-apoptosis	P
GO:0006917	148	0.000138	0.025	7.17e-05	0.01	induction of apoptosis	P
GO:0006919	24	0.00127	0.096	0.00354	0.197	caspase activation	P
GO:0006921	12	0.0588	1	0.124	1	disassembly of cell structures during apoptosis	P
GO:0006928	367	0.237	1	0.0871	1	cell motility	P
GO:0006935	117	0.77	1	0.407	1	chemotaxis	P
GO:0006936	58	0.258	1	0.335	1	muscle contraction	P
GO:0006937	27	0.59	1	0.815	1	regulation of muscle contraction	P
GO:0006939	23	0.404	1	0.559	1	smooth muscle contraction	P
GO:0006940	18	0.874	1	0.736	1	regulation of smooth muscle contraction	P
GO:0006941	16	0.613	1	0.318	1	striated muscle contraction	P
GO:0006944	21	0.195	1	0.497	1	membrane fusion	P
GO:0006950	1052	4.75e-12	0	8.21e-13	0.000377	response to stress	P
GO:0006952	457	0.68	1	0.423	1	defense response	P
GO:0006953	21	0.987	1	1	1	acute-phase response	P
GO:0006954	254	0.0873	1	0.0592	1	inflammatory response	P
GO:0006955	486	0.0706	1	0.0882	1	immune response	P
GO:0006956	48	0.0242	1	0.15	1	complement activation	P
GO:0006958	15	0.284	1	0.712	1	complement activation, classical pathway	P
GO:0006959	62	0.0378	1	0.147	1	humoral immune response	P
GO:0006970	11	0.142	1	0.149	1	response to osmotic stress	P
GO:0006974	233	1.77e-08	0.000884	3.17e-14	0.000377	response to DNA damage stimulus	P
GO:0006979	109	0.00157	0.115	0.000244	0.019	response to oxidative stress	P
GO:0006984	19	0.000898	0.091	0.00061	0.042	ER-nuclear signaling pathway	P
GO:0006986	49	6.18e-05	0.013	0.000506	0.034	response to unfolded protein	P
GO:0006996	975	5.34e-15	0	1.22e-17	0.000377	organelle organization and biogenesis	P
GO:0006997	11	0.319	1	0.0612	1	nuclear organization and biogenesis	P
GO:0007001	307	0.00219	0.115	0.00365	0.197	chromosome organization and biogenesis (sensu Eukaryota)	P
GO:0007005	45	0.00155	0.115	6.4e-06	0.00553	mitochondrion organization and biogenesis	P
GO:0007006	22	0.105	1	0.0105	0.447	mitochondrial membrane organization and biogenesis	P
GO:0007007	10	0.0144	0.89	0.0122	0.604	inner mitochondrial membrane organization and biogenesis	P
GO:0007009	12	0.192	1	0.444	1	plasma membrane organization and biogenesis	P
GO:0007010	408	2.75e-09	0.000884	1.1e-12	0.000377	cytoskeleton organization and biogenesis	P
GO:0007015	33	0.00597	0.327	0.000971	0.06	actin filament organization	P
GO:0007017	190	1.41e-05	0.00481	2.94e-06	0.005	microtubule-based process	P
GO:0007018	109	0.00111	0.091	0.00157	0.0938	microtubule-based movement	P
GO:0007019	15	0.00313	0.186	0.00247	0.197	microtubule depolymerization	P
GO:0007026	15	0.00313	0.186	0.00247	0.197	negative regulation of microtubule depolymerization	P
GO:0007028	126	0.00436	0.26	0.103	1	cytoplasm organization and biogenesis	P
GO:0007030	11	0.0985	1	0.0891	1	Golgi organization and biogenesis	P
GO:0007031	18	0.0383	1	0.182	1	peroxisome organization and biogenesis	P
GO:0007033	22	0.0325	1	0.171	1	vacuole organization and biogenesis	P
GO:0007034	13	0.341	1	0.134	1	vacuolar transport	P
GO:0007040	20	0.016	0.89	0.186	1	lysosome organization and biogenesis	P
GO:0007041	10	0.31	1	0.376	1	lysosomal transport	P
GO:0007046	39	0.0154	0.89	0.0875	1	ribosome biogenesis	P
GO:0007049	417	1.31e-10	0	1.25e-16	0.000377	cell cycle	P
GO:0007050	48	0.102	1	0.000608	0.042	cell cycle arrest	P
GO:0007051	11	0.0103	0.665	0.00162	0.0938	spindle organization and biogenesis	P
GO:0007059	30	0.00418	0.199	0.000784	0.058	chromosome segregation	P
GO:0007067	109	8.47e-06	0.003	1.31e-06	0.00295	mitosis	P
GO:0007088	44	0.0251	1	0.0564	1	regulation of mitosis	P
GO:0007126	60	0.00047	0.0385	0.000265	0.019	meiosis	P
GO:0007127	24	0.0191	0.965	0.00628	0.354	meiosis I	P
GO:0007140	13	0.0129	0.89	0.0438	1	male meiosis	P
GO:0007143	11	0.175	1	0.0544	1	female meiosis	P
GO:0007154	4289	1	1	1	1	cell communication	P
GO:0007155	577	0.989	1	0.666	1	cell adhesion	P
GO:0007156	113	0.999	1	1	1	homophilic cell adhesion	P
GO:0007157	26	0.198	1	0.17	1	heterophilic cell adhesion	P
GO:0007159	16	0.161	1	0.103	1	leukocyte adhesion	P
GO:0007160	81	0.192	1	0.0363	1	cell-matrix adhesion	P
GO:0007162	10	0.201	1	0.328	1	negative regulation of cell adhesion	P
GO:0007163	16	0.00283	0.118	0.0177	0.894	establishment and/or maintenance of cell polarity	P
GO:0007165	3980	1	1	1	1	signal transduction	P
GO:0007166	2738	1	1	1	1	cell surface receptor linked signal transduction	P
GO:0007167	247	0.165	1	0.0551	1	enzyme linked receptor protein signaling pathway	P
GO:0007169	145	0.189	1	0.0969	1	transmembrane receptor protein tyrosine kinase signaling pathway	P
GO:0007172	12	0.113	1	0.107	1	signal complex formation	P
GO:0007173	17	0.49	1	0.279	1	epidermal growth factor receptor signaling pathway	P
GO:0007178	100	0.253	1	0.149	1	transmembrane receptor protein serine/threonine kinase signaling pathway	P
GO:0007179	62	0.119	1	0.203	1	transforming growth factor beta receptor signaling pathway	P
GO:0007186	2253	1	1	1	1	G-protein coupled receptor protein signaling pathway	P
GO:0007187	53	0.401	1	0.539	1	G-protein signaling, coupled to cyclic nucleotide second messenger	P
GO:0007188	50	0.432	1	0.646	1	G-protein signaling, coupled to cAMP nucleotide second messenger	P
GO:0007189	29	0.77	1	0.868	1	G-protein signaling, adenylate cyclase activating pathway	P
GO:0007193	15	0.463	1	0.582	1	G-protein signaling, adenylate cyclase inhibiting pathway	P
GO:0007200	46	0.442	1	0.998	1	G-protein signaling, coupled to IP3 second messenger (phospholipase C activating)	P
GO:0007204	41	0.0444	1	0.124	1	elevation of cytosolic calcium ion concentration	P
GO:0007205	23	0.257	1	0.984	1	protein kinase C activation	P
GO:0007212	12	0.67	1	0.647	1	dopamine receptor signaling pathway	P
GO:0007214	29	0.994	1	0.993	1	gamma-aminobutyric acid signaling pathway	P
GO:0007215	10	0.911	1	0.949	1	glutamate signaling pathway	P
GO:0007218	72	0.395	1	0.249	1	neuropeptide signaling pathway	P
GO:0007219	39	0.607	1	0.381	1	Notch signaling pathway	P
GO:0007223	20	0.0941	1	0.48	1	frizzled-2 signaling pathway	P
GO:0007224	26	0.191	1	0.162	1	smoothened signaling pathway	P
GO:0007229	30	0.75	1	0.486	1	integrin-mediated signaling pathway	P
GO:0007242	1095	6.33e-14	0	1.53e-19	0.000377	intracellular signaling cascade	P
GO:0007243	333	1.31e-06	0.002	1.11e-08	0.000885	protein kinase cascade	P
GO:0007249	120	9.16e-05	0.013	0.00058	0.042	I-kappaB kinase/NF-kappaB cascade	P
GO:0007254	38	0.309	1	0.632	1	JNK cascade	P
GO:0007259	42	0.374	1	0.117	1	JAK-STAT cascade	P
GO:0007260	20	0.872	1	0.174	1	tyrosine phosphorylation of STAT protein	P
GO:0007264	392	2.44e-06	0.002	5.82e-10	0.000377	small GTPase mediated signal transduction	P
GO:0007265	26	0.04	1	0.0742	1	Ras protein signal transduction	P
GO:0007266	82	0.101	1	0.00368	0.197	Rho protein signal transduction	P
GO:0007267	370	0.0715	1	0.0829	1	cell-cell signaling	P
GO:0007268	233	0.142	1	0.316	1	synaptic transmission	P
GO:0007269	65	0.768	1	0.784	1	neurotransmitter secretion	P
GO:0007270	51	0.644	1	0.887	1	nerve-nerve synaptic transmission	P
GO:0007271	13	0.383	1	0.822	1	synaptic transmission, cholinergic	P
GO:0007272	36	0.393	1	0.36	1	ensheathment of neurons	P
GO:0007274	14	0.00477	0.26	0.18	1	neuromuscular synaptic transmission	P
GO:0007275	2146	8.84e-10	0	4.21e-12	0.000377	development	P
GO:0007276	227	0.000563	0.0385	3.95e-05	0.008	gametogenesis	P
GO:0007281	37	0.0856	1	0.0347	1	germ cell development	P
GO:0007283	161	1.89e-05	0.00481	4.45e-06	0.00553	spermatogenesis	P
GO:0007286	45	0.0291	1	0.0126	0.604	spermatid development	P
GO:0007292	36	0.19	1	0.0887	1	female gamete generation	P
GO:0007338	38	0.161	1	0.304	1	fertilization (sensu Metazoa)	P
GO:0007339	19	0.334	1	0.259	1	binding of sperm to zona pellucida	P
GO:0007346	29	0.412	1	0.158	1	regulation of progression through mitotic cell cycle	P
GO:0007368	29	0.512	1	0.696	1	determination of left/right symmetry	P
GO:0007369	55	0.0034	0.186	0.00305	0.197	gastrulation	P
GO:0007389	210	0.936	1	0.972	1	pattern specification	P
GO:0007398	105	0.0141	0.89	0.0189	0.894	ectoderm development	P
GO:0007399	653	0.0142	0.89	0.0617	1	nervous system development	P
GO:0007405	25	0.0943	1	0.216	1	neuroblast proliferation	P
GO:0007409	157	0.628	1	0.904	1	axonogenesis	P
GO:0007411	82	0.812	1	0.979	1	axon guidance	P
GO:0007416	19	0.268	1	0.193	1	synaptogenesis	P
GO:0007417	295	0.126	1	0.454	1	central nervous system development	P
GO:0007420	223	0.0791	1	0.193	1	brain development	P
GO:0007422	26	0.526	1	0.983	1	peripheral nervous system development	P
GO:0007423	154	0.345	1	0.763	1	sensory organ development	P
GO:0007431	14	0.583	1	0.226	1	salivary gland development	P
GO:0007492	12	0.703	1	0.691	1	endoderm development	P
GO:0007498	42	0.0668	1	0.0164	0.894	mesoderm development	P
GO:0007507	131	0.0786	1	0.0617	1	heart development	P
GO:0007512	11	0.996	1	0.969	1	adult heart development	P
GO:0007517	174	0.335	1	0.157	1	muscle development	P
GO:0007519	118	0.368	1	0.118	1	striated muscle development	P
GO:0007528	19	0.00776	0.665	0.0433	1	neuromuscular junction development	P
GO:0007530	13	0.67	1	0.293	1	sex determination	P
GO:0007548	93	0.474	1	0.312	1	sex differentiation	P
GO:0007565	41	0.407	1	0.359	1	pregnancy	P
GO:0007566	14	0.0228	1	0.0433	1	embryo implantation	P
GO:0007568	61	0.11	1	0.0433	1	aging	P
GO:0007569	24	0.343	1	0.351	1	cell aging	P
GO:0007582	11687	0	0	0	0	physiological process	P
GO:0007584	61	0.000281	0.025	0.000147	0.014	response to nutrient	P
GO:0007585	26	0.0926	1	0.934	1	respiratory gaseous exchange	P
GO:0007586	36	0.0145	0.89	0.149	1	digestion	P
GO:0007588	23	0.868	1	1	1	excretion	P
GO:0007589	12	0.984	1	1	1	fluid secretion	P
GO:0007595	29	0.397	1	0.566	1	lactation	P
GO:0007596	115	0.78	1	0.905	1	blood coagulation	P
GO:0007599	115	0.78	1	0.905	1	hemostasis	P
GO:0007600	244	0.991	1	0.973	1	sensory perception	P
GO:0007601	80	0.325	1	0.166	1	visual perception	P
GO:0007602	16	0.686	1	0.563	1	phototransduction	P
GO:0007605	51	0.0802	1	0.0473	1	sensory perception of sound	P
GO:0007606	84	1	1	1	1	sensory perception of chemical stimulus	P
GO:0007608	32	1	1	0.98	1	sensory perception of smell	P
GO:0007610	354	0.33	1	0.148	1	behavior	P
GO:0007611	71	0.817	1	0.695	1	learning and/or memory	P
GO:0007612	44	0.989	1	0.951	1	learning	P
GO:0007613	24	0.615	1	0.487	1	memory	P
GO:0007617	13	0.989	1	0.95	1	mating behavior	P
GO:0007623	29	0.0455	1	0.148	1	circadian rhythm	P
GO:0007626	219	0.278	1	0.224	1	locomotory behavior	P
GO:0007628	20	0.0312	1	0.309	1	adult walking behavior	P
GO:0007631	44	0.166	1	0.672	1	feeding behavior	P
GO:0007632	24	0.926	1	0.744	1	visual behavior	P
GO:0008009	36	0.445	1	0.352	1	chemokine activity	F
GO:0008013	16	0.0135	0.89	0.00268	0.197	beta-catenin binding	F
GO:0008015	128	0.68	1	0.991	1	circulation	P
GO:0008016	37	0.719	1	0.943	1	regulation of heart contraction	P
GO:0008017	39	0.0178	0.89	0.00426	0.246	microtubule binding	F
GO:0008021	68	0.155	1	0.18	1	synaptic vesicle	C
GO:0008022	69	3.87e-07	0.000885	1.11e-05	0.00553	protein C-terminus binding	F
GO:0008026	94	6.39e-05	0.013	7.65e-07	0.00295	ATP-dependent helicase activity	F
GO:0008028	14	0.991	1	0.603	1	monocarboxylic acid transporter activity	F
GO:0008033	40	0.0474	1	0.0723	1	tRNA processing	P
GO:0008034	13	0.145	1	0.0412	1	lipoprotein binding	F
GO:0008037	20	0.848	1	0.527	1	cell recognition	P
GO:0008038	13	0.665	1	0.507	1	neuron recognition	P
GO:0008045	13	0.614	1	1	1	motor axon guidance	P
GO:0008047	191	8.08e-05	0.013	2.59e-07	0.00295	enzyme activator activity	F
GO:0008060	20	0.334	1	0.084	1	ARF GTPase activator activity	F
GO:0008064	31	0.00228	0.115	0.000446	0.034	regulation of actin polymerization and/or depolymerization	P
GO:0008066	191	1	1	1	1	glutamate receptor activity	F
GO:0008067	177	1	1	1	1	metabotropic glutamate, GABA-B-like receptor activity	F
GO:0008076	129	0.192	1	0.237	1	voltage-gated potassium channel complex	C
GO:0008080	42	0.00709	0.665	0.00394	0.246	N-acetyltransferase activity	F
GO:0008081	62	0.765	1	0.224	1	phosphoric diester hydrolase activity	F
GO:0008083	152	0.764	1	0.13	1	growth factor activity	F
GO:0008088	12	0.059	1	0.0215	0.894	axon cargo transport	P
GO:0008092	373	9.31e-05	0.013	1.22e-08	0.000885	cytoskeletal protein binding	F
GO:0008094	49	0.00402	0.199	0.00417	0.246	DNA-dependent ATPase activity	F
GO:0008104	752	9.18e-20	0	7.89e-25	0	protein localization	P
GO:0008121	16	0.0887	1	0.0446	1	ubiquinol-cytochrome-c reductase activity	F
GO:0008134	244	7.88e-10	0	4.66e-11	0.000377	transcription factor binding	F
GO:0008135	101	0.0256	1	0.00851	0.447	translation factor activity, nucleic acid binding	F
GO:0008137	35	0.552	1	0.841	1	NADH dehydrogenase (ubiquinone) activity	F
GO:0008138	45	0.113	1	0.0755	1	protein tyrosine/serine/threonine phosphatase activity	F
GO:0008144	14	0.422	1	0.323	1	drug binding	F
GO:0008146	42	1	1	0.512	1	sulfotransferase activity	F
GO:0008150	14402	2.59e-08	0.000884	1.67e-18	0.000377	biological_process	P
GO:0008152	8455	0	0	0	0	metabolism	P
GO:0008154	46	0.00715	0.665	0.000978	0.06	actin polymerization and/or depolymerization	P
GO:0008168	161	0.0422	1	0.115	1	methyltransferase activity	F
GO:0008170	44	0.768	1	0.879	1	N-methyltransferase activity	F
GO:0008172	10	0.0834	1	0.201	1	S-methyltransferase activity	F
GO:0008173	20	0.00265	0.118	0.426	1	RNA methyltransferase activity	F
GO:0008175	10	0.0018	0.115	0.9	1	tRNA methyltransferase activity	F
GO:0008188	115	0.74	1	0.981	1	neuropeptide receptor activity	F
GO:0008194	63	0.363	1	0.494	1	UDP-glycosyltransferase activity	F
GO:0008199	43	0.667	1	0.758	1	ferric iron binding	F
GO:0008201	45	0.991	1	0.171	1	heparin binding	F
GO:0008202	151	0.0624	1	0.0197	0.894	steroid metabolism	P
GO:0008203	59	0.0123	0.89	0.0413	1	cholesterol metabolism	P
GO:0008206	14	0.521	1	0.419	1	bile acid metabolism	P
GO:0008207	14	0.398	1	0.885	1	C21-steroid hormone metabolism	P
GO:0008211	11	0.153	1	0.855	1	glucocorticoid metabolism	P
GO:0008213	22	0.0305	1	0.00869	0.447	protein amino acid alkylation	P
GO:0008217	62	0.254	1	0.899	1	blood pressure regulation	P
GO:0008219	630	7.59e-11	0	1.96e-12	0.000377	cell death	P
GO:0008227	130	0.0264	1	0.319	1	amine receptor activity	F
GO:0008233	773	0.00997	0.665	0.000164	0.016	peptidase activity	F
GO:0008234	181	0.00691	0.665	0.000144	0.014	cysteine-type peptidase activity	F
GO:0008235	67	0.25	1	0.218	1	metalloexopeptidase activity	F
GO:0008236	254	0.541	1	0.153	1	serine-type peptidase activity	F
GO:0008237	230	0.315	1	0.491	1	metallopeptidase activity	F
GO:0008238	107	0.388	1	0.382	1	exopeptidase activity	F
GO:0008239	11	0.248	1	0.45	1	dipeptidyl-peptidase activity	F
GO:0008270	1847	2.08e-21	0	3.72e-35	0	zinc ion binding	F
GO:0008272	13	0.625	1	0.83	1	sulfate transport	P
GO:0008276	24	0.0968	1	0.0546	1	protein methyltransferase activity	F
GO:0008277	19	0.105	1	0.0399	1	regulation of G-protein coupled receptor protein signaling pathway	P
GO:0008283	572	0.00011	0.025	6.6e-07	0.00295	cell proliferation	P
GO:0008284	237	0.287	1	0.127	1	positive regulation of cell proliferation	P
GO:0008285	182	0.00332	0.186	0.00408	0.246	negative regulation of cell proliferation	P
GO:0008286	26	0.0897	1	0.0328	1	insulin receptor signaling pathway	P
GO:0008287	32	0.438	1	0.161	1	protein serine/threonine phosphatase complex	C
GO:0008289	302	3.83e-05	0.00481	1.67e-07	0.00295	lipid binding	F
GO:0008299	22	0.54	1	0.162	1	isoprenoid biosynthesis	P
GO:0008305	30	0.191	1	0.0979	1	integrin complex	C
GO:0008306	14	0.318	1	0.837	1	associative learning	P
GO:0008307	10	0.787	1	0.29	1	structural constituent of muscle	F
GO:0008308	10	0.645	1	0.341	1	voltage-gated ion-selective channel activity	F
GO:0008312	12	0.112	1	0.782	1	7S RNA binding	F
GO:0008324	732	0.000525	0.0385	0.00326	0.197	cation transporter activity	F
GO:0008328	12	0.801	1	0.517	1	ionotropic glutamate receptor complex	C
GO:0008344	48	0.0133	0.89	0.287	1	adult locomotory behavior	P
GO:0008360	21	0.023	1	0.00165	0.0938	regulation of cell shape	P
GO:0008361	129	0.0694	1	0.00209	0.197	regulation of cell size	P
GO:0008366	36	0.393	1	0.36	1	axon ensheathment	P
GO:0008373	16	0.34	1	0.401	1	sialyltransferase activity	F
GO:0008374	27	0.0335	1	0.121	1	O-acyltransferase activity	F
GO:0008375	20	0.106	1	0.0677	1	acetylglucosaminyltransferase activity	F
GO:0008376	13	0.761	1	0.421	1	acetylgalactosaminyltransferase activity	F
GO:0008378	30	0.194	1	0.762	1	galactosyltransferase activity	F
GO:0008380	86	1.94e-06	0.002	3.02e-06	0.005	RNA splicing	P
GO:0008395	14	0.855	1	0.999	1	steroid hydroxylase activity	F
GO:0008406	61	0.545	1	0.413	1	gonad development	P
GO:0008408	21	0.017	0.89	0.00852	0.447	3'-5' exonuclease activity	F
GO:0008415	136	7.93e-05	0.013	0.000282	0.019	acyltransferase activity	F
GO:0008430	17	0.0282	1	0.0545	1	selenium binding	F
GO:0008443	11	0.299	1	0.46	1	phosphofructokinase activity	F
GO:0008483	26	0.535	1	0.0216	0.894	transaminase activity	F
GO:0008484	13	0.998	1	0.79	1	sulfuric ester hydrolase activity	F
GO:0008493	38	0.55	1	0.222	1	tetracycline transporter activity	F
GO:0008509	167	0.152	1	0.269	1	anion transporter activity	F
GO:0008527	13	0.809	1	1	1	taste receptor activity	F
GO:0008528	694	1	1	1	1	peptide receptor activity, G-protein coupled	F
GO:0008533	15	0.91	1	1	1	astacin activity	F
GO:0008542	23	0.961	1	0.845	1	visual learning	P
GO:0008543	11	0.578	1	0.55	1	fibroblast growth factor receptor signaling pathway	P
GO:0008544	100	0.0216	1	0.0294	1	epidermis development	P
GO:0008565	123	0.00123	0.096	9.36e-06	0.00553	protein transporter activity	F
GO:0008584	24	0.495	1	0.416	1	male gonad development	P
GO:0008585	38	0.243	1	0.385	1	female gonad development	P
GO:0008589	11	0.444	1	0.5	1	regulation of smoothened signaling pathway	P
GO:0008601	16	0.408	1	0.245	1	protein phosphatase type 2A regulator activity	F
GO:0008603	23	0.489	1	0.141	1	cAMP-dependent protein kinase regulator activity	F
GO:0008610	223	0.0105	0.665	0.0243	1	lipid biosynthesis	P
GO:0008624	12	0.152	1	0.273	1	induction of apoptosis by extracellular signals	P
GO:0008629	24	0.0754	1	0.00234	0.197	induction of apoptosis by intracellular signals	P
GO:0008630	18	0.197	1	6.19e-06	0.00553	DNA damage response, signal transduction resulting in induction of apoptosis	P
GO:0008632	55	8.88e-05	0.013	0.000117	0.014	apoptotic program	P
GO:0008637	17	0.0145	0.89	0.0137	0.604	apoptotic mitochondrial changes	P
GO:0008643	89	0.0172	0.89	0.00311	0.197	carbohydrate transport	P
GO:0008645	43	0.0447	1	0.0233	0.894	hexose transport	P
GO:0008652	85	0.0141	0.89	0.0136	0.604	amino acid biosynthesis	P
GO:0008654	49	0.169	1	0.0819	1	phospholipid biosynthesis	P
GO:0008667	42	0.255	1	0.116	1	2,3-dihydro-2,3-dihydroxybenzoate dehydrogenase activity	F
GO:0008757	50	8.29e-06	0.003	0.016	0.894	S-adenosylmethionine-dependent methyltransferase activity	F
GO:0008943	131	1	1	1	1	glyceraldehyde-3-phosphate dehydrogenase activity	F
GO:0009055	166	0.759	1	0.617	1	electron carrier activity	F
GO:0009056	727	2.16e-05	0.00481	4.3e-08	0.000925	catabolism	P
GO:0009057	490	0.00368	0.186	0.00126	0.06	macromolecule catabolism	P
GO:0009058	1916	3.57e-14	0	7.5e-10	0.000377	biosynthesis	P
GO:0009059	1322	3.88e-09	0.000884	0.000385	0.034	macromolecule biosynthesis	P
GO:0009060	29	0.0157	0.89	0.0844	1	aerobic respiration	P
GO:0009063	47	0.534	1	0.0534	1	amino acid catabolism	P
GO:0009064	43	0.0609	1	0.00129	0.06	glutamine family amino acid metabolism	P
GO:0009065	13	0.0777	1	0.165	1	glutamine family amino acid catabolism	P
GO:0009066	21	0.265	1	0.435	1	aspartate family amino acid metabolism	P
GO:0009067	13	0.0853	1	0.229	1	aspartate family amino acid biosynthesis	P
GO:0009069	20	0.136	1	0.0862	1	serine family amino acid metabolism	P
GO:0009072	66	0.242	1	0.062	1	aromatic amino acid family metabolism	P
GO:0009073	46	0.251	1	0.119	1	aromatic amino acid family biosynthesis	P
GO:0009075	11	0.72	1	0.684	1	histidine family amino acid metabolism	P
GO:0009084	16	0.106	1	0.0621	1	glutamine family amino acid biosynthesis	P
GO:0009100	90	0.0447	1	0.0106	0.447	glycoprotein metabolism	P
GO:0009101	72	0.0422	1	0.0249	1	glycoprotein biosynthesis	P
GO:0009108	99	2.4e-05	0.00481	0.00149	0.0938	coenzyme biosynthesis	P
GO:0009109	21	0.00911	0.665	0.0454	1	coenzyme catabolism	P
GO:0009110	23	0.205	1	0.4	1	vitamin biosynthesis	P
GO:0009112	19	0.186	1	0.00911	0.447	nucleobase metabolism	P
GO:0009116	28	0.148	1	0.0349	1	nucleoside metabolism	P
GO:0009117	209	7.79e-07	0.002	1.19e-08	0.000885	nucleotide metabolism	P
GO:0009119	11	0.186	1	0.0641	1	ribonucleoside metabolism	P
GO:0009123	27	0.145	1	0.00122	0.06	nucleoside monophosphate metabolism	P
GO:0009124	27	0.145	1	0.00122	0.06	nucleoside monophosphate biosynthesis	P
GO:0009126	20	0.147	1	0.00844	0.447	purine nucleoside monophosphate metabolism	P
GO:0009127	20	0.147	1	0.00844	0.447	purine nucleoside monophosphate biosynthesis	P
GO:0009132	12	0.0238	1	0.0548	1	nucleoside diphosphate metabolism	P
GO:0009141	85	0.00156	0.115	0.000265	0.019	nucleoside triphosphate metabolism	P
GO:0009142	69	0.000685	0.043	0.00493	0.25	nucleoside triphosphate biosynthesis	P
GO:0009144	76	0.000874	0.091	0.000284	0.019	purine nucleoside triphosphate metabolism	P
GO:0009145	66	0.0011	0.091	0.00343	0.197	purine nucleoside triphosphate biosynthesis	P
GO:0009147	21	0.0816	1	0.0989	1	pyrimidine nucleoside triphosphate metabolism	P
GO:0009150	97	0.000405	0.0385	3.4e-05	0.008	purine ribonucleotide metabolism	P
GO:0009152	87	0.000845	0.091	0.000311	0.019	purine ribonucleotide biosynthesis	P
GO:0009156	25	0.104	1	0.00334	0.197	ribonucleoside monophosphate biosynthesis	P
GO:0009161	25	0.104	1	0.00334	0.197	ribonucleoside monophosphate metabolism	P
GO:0009165	156	2.17e-05	0.00481	1.15e-05	0.00553	nucleotide biosynthesis	P
GO:0009166	20	0.245	1	0.0104	0.447	nucleotide catabolism	P
GO:0009167	20	0.147	1	0.00844	0.447	purine ribonucleoside monophosphate metabolism	P
GO:0009168	20	0.147	1	0.00844	0.447	purine ribonucleoside monophosphate biosynthesis	P
GO:0009187	43	0.378	1	0.0949	1	cyclic nucleotide metabolism	P
GO:0009190	33	0.339	1	0.18	1	cyclic nucleotide biosynthesis	P
GO:0009199	74	0.000865	0.091	0.000732	0.058	ribonucleoside triphosphate metabolism	P
GO:0009201	66	0.0011	0.091	0.00343	0.197	ribonucleoside triphosphate biosynthesis	P
GO:0009205	74	0.000865	0.091	0.000732	0.058	purine ribonucleoside triphosphate metabolism	P
GO:0009206	66	0.0011	0.091	0.00343	0.197	purine ribonucleoside triphosphate biosynthesis	P
GO:0009208	15	0.0515	1	0.066	1	pyrimidine ribonucleoside triphosphate metabolism	P
GO:0009209	15	0.0515	1	0.066	1	pyrimidine ribonucleoside triphosphate biosynthesis	P
GO:0009218	17	0.0332	1	0.0597	1	pyrimidine ribonucleotide metabolism	P
GO:0009220	17	0.0332	1	0.0597	1	pyrimidine ribonucleotide biosynthesis	P
GO:0009225	12	0.528	1	0.0707	1	nucleotide-sugar metabolism	P
GO:0009237	42	0.255	1	0.116	1	siderophore metabolism	P
GO:0009238	42	0.255	1	0.116	1	enterobactin metabolism	P
GO:0009239	42	0.255	1	0.116	1	enterobactin biosynthesis	P
GO:0009250	33	0.932	1	0.351	1	glucan biosynthesis	P
GO:0009259	102	0.000309	0.025	1.54e-05	0.007	ribonucleotide metabolism	P
GO:0009260	92	0.000647	0.0385	0.000148	0.014	ribonucleotide biosynthesis	P
GO:0009262	14	0.259	1	0.00563	0.354	deoxyribonucleotide metabolism	P
GO:0009266	187	0.00913	0.665	0.126	1	response to temperature stimulus	P
GO:0009267	12	0.0562	1	0.156	1	cellular response to starvation	P
GO:0009288	40	0.363	1	0.64	1	flagellum (sensu Bacteria)	C
GO:0009296	14	0.00454	0.26	0.0177	0.894	flagellum biogenesis	P
GO:0009306	62	0.328	1	0.485	1	protein secretion	P
GO:0009308	464	0.000156	0.025	0.000363	0.034	amine metabolism	P
GO:0009309	119	0.0577	1	0.0734	1	amine biosynthesis	P
GO:0009310	54	0.414	1	0.0378	1	amine catabolism	P
GO:0009311	10	0.146	1	0.141	1	oligosaccharide metabolism	P
GO:0009314	104	0.00109	0.091	0.000299	0.019	response to radiation	P
GO:0009331	12	0.47	1	0.273	1	glycerol-3-phosphate dehydrogenase complex	C
GO:0009395	11	0.236	1	0.179	1	phospholipid catabolism	P
GO:0009396	11	0.0217	1	0.131	1	folic acid and derivative biosynthesis	P
GO:0009401	23	0.132	1	0.0243	1	phosphoenolpyruvate-dependent sugar phosphotransferase system	P
GO:0009405	56	0.335	1	0.162	1	pathogenesis	P
GO:0009408	15	0.187	1	0.277	1	response to heat	P
GO:0009409	167	0.0229	1	0.176	1	response to cold	P
GO:0009410	15	0.597	1	0.45	1	response to xenobiotic stimulus	P
GO:0009411	33	0.00281	0.118	0.000174	0.016	response to UV	P
GO:0009416	81	0.0177	0.89	0.00661	0.354	response to light stimulus	P
GO:0009434	16	0.179	1	0.0155	0.894	flagellum (sensu Eukaryota)	C
GO:0009451	28	0.0309	1	0.11	1	RNA modification	P
GO:0009566	50	0.0615	1	0.0691	1	fertilization	P
GO:0009581	48	0.358	1	0.871	1	detection of external stimulus	P
GO:0009582	42	0.265	1	0.893	1	detection of abiotic stimulus	P
GO:0009583	20	0.437	1	0.44	1	detection of light stimulus	P
GO:0009593	11	0.887	1	0.821	1	detection of chemical stimulus	P
GO:0009605	636	0.0715	1	0.0457	1	response to external stimulus	P
GO:0009607	189	0.0737	1	0.12	1	response to biotic stimulus	P
GO:0009611	422	0.321	1	0.184	1	response to wounding	P
GO:0009612	45	0.0706	1	0.623	1	response to mechanical stimulus	P
GO:0009615	40	0.344	1	0.412	1	response to virus	P
GO:0009617	76	0.971	1	0.931	1	response to bacterium	P
GO:0009620	14	0.789	1	0.533	1	response to fungus	P
GO:0009628	355	1.3e-05	0.00481	0.000446	0.034	response to abiotic stimulus	P
GO:0009636	29	0.0616	1	0.0906	1	response to toxin	P
GO:0009653	1104	0.000439	0.0385	0.000627	0.042	morphogenesis	P
GO:0009698	43	0.284	1	0.125	1	phenylpropanoid metabolism	P
GO:0009712	42	0.255	1	0.116	1	catechol metabolism	P
GO:0009719	361	5.26e-07	0.001	1.61e-12	0.000377	response to endogenous stimulus	P
GO:0009725	107	0.369	1	0.101	1	response to hormone stimulus	P
GO:0009743	31	0.0762	1	0.0102	0.447	response to carbohydrate stimulus	P
GO:0009746	23	0.132	1	0.0095	0.447	response to hexose stimulus	P
GO:0009749	23	0.132	1	0.0095	0.447	response to glucose stimulus	P
GO:0009790	449	0.0482	1	0.0146	0.894	embryonic development	P
GO:0009791	80	0.114	1	0.214	1	post-embryonic development	P
GO:0009792	262	0.0529	1	0.0146	0.894	embryonic development (sensu Metazoa)	P
GO:0009798	15	0.239	1	0.411	1	axis specification	P
GO:0009799	30	0.511	1	0.659	1	determination of symmetry	P
GO:0009855	30	0.511	1	0.659	1	determination of bilateral symmetry	P
GO:0009880	44	0.73	1	0.351	1	embryonic pattern specification	P
GO:0009887	648	0.0907	1	0.278	1	organ morphogenesis	P
GO:0009888	359	0.0992	1	0.0867	1	tissue development	P
GO:0009889	162	0.111	1	0.00225	0.197	regulation of biosynthesis	P
GO:0009890	41	0.01	0.665	0.00325	0.197	negative regulation of biosynthesis	P
GO:0009891	73	0.3	1	0.0564	1	positive regulation of biosynthesis	P
GO:0009892	366	1.02e-08	0.000884	3.33e-08	0.000925	negative regulation of metabolism	P
GO:0009893	515	1.76e-06	0.002	2.33e-06	0.005	positive regulation of metabolism	P
GO:0009894	28	0.642	1	0.0891	1	regulation of catabolism	P
GO:0009896	10	0.366	1	0.31	1	positive regulation of catabolism	P
GO:0009897	103	0.251	1	0.0467	1	external side of plasma membrane	C
GO:0009913	36	0.155	1	0.0972	1	epidermal cell differentiation	P
GO:0009925	33	0.879	1	0.626	1	basal plasma membrane	C
GO:0009948	11	0.115	1	0.274	1	anterior/posterior axis specification	P
GO:0009952	121	0.997	1	0.98	1	anterior/posterior pattern formation	P
GO:0009953	38	0.153	1	0.608	1	dorsal/ventral pattern formation	P
GO:0009954	20	0.946	1	1	1	proximal/distal pattern formation	P
GO:0009966	490	0.00758	0.665	0.000967	0.06	regulation of signal transduction	P
GO:0009967	182	0.00165	0.115	0.00118	0.06	positive regulation of signal transduction	P
GO:0009968	110	0.0666	1	0.178	1	negative regulation of signal transduction	P
GO:0009975	22	0.231	1	0.0522	1	cyclase activity	F
GO:0009986	202	0.0574	1	0.00343	0.197	cell surface	C
GO:0009987	13355	3.75e-07	0.000885	5.29e-16	0.000377	cellular process	P
GO:0009991	99	0.000339	0.0385	0.000123	0.014	response to extracellular stimulus	P
GO:0009994	16	0.124	1	0.149	1	oocyte differentiation	P
GO:0010001	44	0.656	1	0.942	1	glial cell differentiation	P
GO:0010008	34	0.0173	0.89	0.000705	0.058	endosome membrane	C
GO:0010033	93	0.0265	1	0.00658	0.354	response to organic substance	P
GO:0010035	53	0.714	1	0.0943	1	response to inorganic substance	P
GO:0010038	48	0.596	1	0.0625	1	response to metal ion	P
GO:0010092	12	0.331	1	0.588	1	specification of organ identity	P
GO:0010165	12	0.0145	0.89	0.0582	1	response to X-ray	P
GO:0010181	11	0.21	1	0.797	1	FMN binding	F
GO:0010212	13	0.309	1	0.0171	0.894	response to ionizing radiation	P
GO:0012501	609	2.06e-10	0	1.43e-12	0.000377	programmed cell death	P
GO:0012502	148	0.000138	0.025	7.17e-05	0.01	induction of programmed cell death	P
GO:0012505	581	2.32e-06	0.002	6.14e-13	0.000377	endomembrane system	C
GO:0012506	81	0.128	1	0.00112	0.06	vesicle membrane	C
GO:0014003	12	0.512	1	0.622	1	oligodendrocyte development	P
GO:0014013	13	0.999	1	1	1	regulation of gliogenesis	P
GO:0014020	27	0.254	1	0.124	1	primary neural tube formation	P
GO:0014031	35	0.57	1	0.855	1	mesenchymal cell development	P
GO:0014032	26	0.942	1	0.992	1	neural crest cell development	P
GO:0014033	26	0.942	1	0.992	1	neural crest cell differentiation	P
GO:0014047	11	0.852	1	0.961	1	glutamate secretion	P
GO:0014069	32	0.934	1	0.508	1	postsynaptic density	C
GO:0015002	38	0.000804	0.091	0.309	1	heme-copper terminal oxidase activity	F
GO:0015020	10	1	1	0.984	1	glucuronosyltransferase activity	F
GO:0015031	630	8.29e-21	0	3.28e-27	0	protein transport	P
GO:0015035	15	0.867	1	0.849	1	protein disulfide oxidoreductase activity	F
GO:0015036	21	0.795	1	0.684	1	disulfide oxidoreductase activity	F
GO:0015057	41	0.858	1	0.729	1	thrombin receptor activity	F
GO:0015075	883	0.0023	0.115	0.00637	0.354	ion transporter activity	F
GO:0015077	165	1.12e-05	0.00481	0.0113	0.447	monovalent inorganic cation transporter activity	F
GO:0015078	161	4.55e-06	0.003	0.00894	0.447	hydrogen ion transporter activity	F
GO:0015082	31	0.532	1	0.135	1	di-, tri-valent inorganic cation transporter activity	F
GO:0015103	34	0.0336	1	0.0949	1	inorganic anion transporter activity	F
GO:0015106	16	0.197	1	0.107	1	bicarbonate transporter activity	F
GO:0015108	16	0.171	1	0.135	1	chloride transporter activity	F
GO:0015116	10	0.569	1	0.952	1	sulfate transporter activity	F
GO:0015144	57	0.116	1	0.0302	1	carbohydrate transporter activity	F
GO:0015145	14	0.0659	1	0.0407	1	monosaccharide transporter activity	F
GO:0015149	13	0.108	1	0.0829	1	hexose transporter activity	F
GO:0015171	56	0.483	1	0.0473	1	amino acid transporter activity	F
GO:0015175	16	0.0986	1	0.0069	0.354	neutral amino acid transporter activity	F
GO:0015179	34	0.345	1	0.117	1	L-amino acid transporter activity	F
GO:0015197	21	0.244	1	0.4	1	peptide transporter activity	F
GO:0015203	23	0.96	1	0.645	1	polyamine transporter activity	F
GO:0015232	19	0.771	1	0.766	1	heme transporter activity	F
GO:0015238	45	0.796	1	0.375	1	drug transporter activity	F
GO:0015247	15	1	1	0.995	1	aminophospholipid transporter activity	F
GO:0015267	446	0.151	1	0.261	1	channel or pore class transporter activity	F
GO:0015268	446	0.151	1	0.261	1	alpha-type channel activity	F
GO:0015269	14	0.762	1	0.577	1	calcium-activated potassium channel activity	F
GO:0015276	90	0.643	1	0.849	1	ligand-gated ion channel activity	F
GO:0015290	282	0.219	1	0.115	1	electrochemical potential-driven transporter activity	F
GO:0015291	282	0.219	1	0.115	1	porter activity	F
GO:0015293	150	0.649	1	0.528	1	symporter activity	F
GO:0015294	117	0.875	1	0.692	1	solute:cation symporter activity	F
GO:0015296	75	0.128	1	0.297	1	anion:cation symporter activity	F
GO:0015297	83	0.111	1	0.112	1	antiporter activity	F
GO:0015298	51	0.542	1	0.218	1	solute:cation antiporter activity	F
GO:0015299	51	0.542	1	0.218	1	solute:hydrogen antiporter activity	F
GO:0015300	52	0.483	1	0.217	1	solute:solute antiporter activity	F
GO:0015301	16	0.197	1	0.107	1	anion:anion antiporter activity	F
GO:0015307	38	0.55	1	0.222	1	drug:hydrogen antiporter activity	F
GO:0015370	114	0.916	1	0.78	1	solute:sodium symporter activity	F
GO:0015380	15	0.151	1	0.093	1	anion exchanger activity	F
GO:0015385	14	0.0865	1	0.259	1	sodium:hydrogen antiporter activity	F
GO:0015399	134	0.0917	1	0.122	1	primary active transporter activity	F
GO:0015405	134	0.0917	1	0.122	1	P-P-bond-hydrolysis-driven transporter activity	F
GO:0015433	15	0.101	1	0.235	1	peptide antigen-transporting ATPase activity	F
GO:0015440	15	0.101	1	0.235	1	peptide-transporting ATPase activity	F
GO:0015450	31	0.582	1	0.574	1	protein translocase activity	F
GO:0015457	33	0.862	1	0.454	1	auxiliary transport protein activity	F
GO:0015464	23	0.561	1	0.961	1	acetylcholine receptor activity	F
GO:0015491	19	0.154	1	0.384	1	cation:cation antiporter activity	F
GO:0015520	38	0.55	1	0.222	1	tetracycline:hydrogen antiporter activity	F
GO:0015629	227	0.000586	0.0385	3.55e-05	0.008	actin cytoskeleton	C
GO:0015630	310	4.98e-10	0	1.32e-10	0.000377	microtubule cytoskeleton	C
GO:0015631	54	0.00378	0.186	0.000415	0.034	tubulin binding	F
GO:0015662	56	0.39	1	0.252	1	ATPase activity, coupled to transmembrane movement of ions, phosphorylative mechanism	F
GO:0015669	17	0.371	1	0.502	1	gas transport	P
GO:0015671	15	0.359	1	0.521	1	oxygen transport	P
GO:0015672	417	0.0359	1	0.0876	1	monovalent inorganic cation transport	P
GO:0015674	190	0.00403	0.199	0.0047	0.25	di-, tri-valent inorganic cation transport	P
GO:0015698	172	0.786	1	0.943	1	inorganic anion transport	P
GO:0015711	10	0.754	1	0.594	1	organic anion transport	P
GO:0015749	43	0.0447	1	0.0233	0.894	monosaccharide transport	P
GO:0015758	41	0.0266	1	0.00953	0.447	glucose transport	P
GO:0015800	27	0.0846	1	0.0273	1	acidic amino acid transport	P
GO:0015804	16	0.0704	1	0.0134	0.604	neutral amino acid transport	P
GO:0015807	19	0.011	0.89	0.0683	1	L-amino acid transport	P
GO:0015813	27	0.0846	1	0.0273	1	glutamate transport	P
GO:0015833	70	0.341	1	0.215	1	peptide transport	P
GO:0015837	91	0.0521	1	0.0629	1	amine transport	P
GO:0015849	151	0.0751	1	0.346	1	organic acid transport	P
GO:0015886	19	0.771	1	0.766	1	heme transport	P
GO:0015893	43	0.734	1	0.312	1	drug transport	P
GO:0015904	38	0.55	1	0.222	1	tetracycline transport	P
GO:0015914	19	0.859	1	0.999	1	phospholipid transport	P
GO:0015918	23	0.629	1	0.689	1	sterol transport	P
GO:0015923	15	0.407	1	0.016	0.894	mannosidase activity	F
GO:0015929	12	0.23	1	0.539	1	hexosaminidase activity	F
GO:0015931	48	0.000775	0.091	4.26e-05	0.008	nucleobase, nucleoside, nucleotide and nucleic acid transport	P
GO:0015932	14	0.425	1	0.445	1	nucleobase, nucleoside, nucleotide and nucleic acid transporter activity	F
GO:0015934	36	0.0615	1	0.247	1	large ribosomal subunit	C
GO:0015935	48	0.00044	0.0385	0.00949	0.447	small ribosomal subunit	C
GO:0015980	329	0.953	1	0.879	1	energy derivation by oxidation of organic compounds	P
GO:0015985	49	0.00452	0.26	0.0179	0.894	energy coupled proton transport, down electrochemical gradient	P
GO:0015986	49	0.00452	0.26	0.0179	0.894	ATP synthesis coupled proton transport	P
GO:0015992	87	0.0381	1	0.0733	1	proton transport	P
GO:0016010	12	0.728	1	0.614	1	dystrophin-associated glycoprotein complex	C
GO:0016020	6400	1	1	1	1	membrane	C
GO:0016021	4356	1	1	1	1	integral to membrane	C
GO:0016023	281	2.07e-07	0.000884	2.77e-14	0.000377	cytoplasmic membrane-bound vesicle	C
GO:0016032	32	0.568	1	0.0809	1	viral life cycle	P
GO:0016042	95	0.00057	0.0385	0.000484	0.034	lipid catabolism	P
GO:0016043	1861	2.63e-26	0	9.73e-33	0	cell organization and biogenesis	P
GO:0016044	73	0.00417	0.199	0.027	1	membrane organization and biogenesis	P
GO:0016049	115	0.0416	1	0.000785	0.058	cell growth	P
GO:0016051	115	0.613	1	0.0859	1	carbohydrate biosynthesis	P
GO:0016052	247	0.996	1	0.998	1	carbohydrate catabolism	P
GO:0016053	67	0.135	1	0.119	1	organic acid biosynthesis	P
GO:0016055	113	0.000542	0.0385	0.000587	0.042	Wnt receptor signaling pathway	P
GO:0016064	101	0.0906	1	0.133	1	immunoglobulin mediated immune response	P
GO:0016068	49	0.295	1	0.357	1	type I hypersensitivity	P
GO:0016070	415	7.89e-17	0	6.32e-14	0.000377	RNA metabolism	P
GO:0016071	173	7.8e-12	0	1.97e-09	0.000377	mRNA metabolism	P
GO:0016072	45	0.00459	0.26	0.052	1	rRNA metabolism	P
GO:0016079	14	0.129	1	0.0495	1	synaptic vesicle exocytosis	P
GO:0016089	43	0.284	1	0.125	1	aromatic amino acid family biosynthesis, shikimate pathway	P
GO:0016125	64	0.0158	0.89	0.0418	1	sterol metabolism	P
GO:0016126	25	0.921	1	0.773	1	sterol biosynthesis	P
GO:0016192	455	3.38e-08	0.000884	1.69e-18	0.000377	vesicle-mediated transport	P
GO:0016197	25	0.00862	0.665	0.00105	0.06	endosome transport	P
GO:0016202	10	0.164	1	0.0468	1	regulation of striated muscle development	P
GO:0016208	19	0.333	1	0.836	1	AMP binding	F
GO:0016209	71	0.108	1	0.0343	1	antioxidant activity	F
GO:0016229	30	0.304	1	0.621	1	steroid dehydrogenase activity	F
GO:0016236	10	0.374	1	0.0656	1	macroautophagy	P
GO:0016247	32	0.859	1	0.577	1	channel regulator activity	F
GO:0016251	11	0.0465	1	0.167	1	general RNA polymerase II transcription factor activity	F
GO:0016265	635	5.71e-11	0	1.6e-12	0.000377	death	P
GO:0016278	13	0.0286	1	0.126	1	lysine N-methyltransferase activity	F
GO:0016279	13	0.0286	1	0.126	1	protein-lysine N-methyltransferase activity	F
GO:0016289	19	0.715	1	0.511	1	CoA hydrolase activity	F
GO:0016290	14	0.69	1	0.502	1	palmitoyl-CoA hydrolase activity	F
GO:0016298	81	0.0818	1	0.027	1	lipase activity	F
GO:0016301	893	2.01e-05	0.00481	9.3e-11	0.000377	kinase activity	F
GO:0016303	10	0.317	1	0.0517	1	phosphatidylinositol 3-kinase activity	F
GO:0016310	860	0.000215	0.025	5.7e-11	0.000377	phosphorylation	P
GO:0016311	144	0.0546	1	2.33e-05	0.007	dephosphorylation	P
GO:0016323	135	0.0527	1	0.133	1	basolateral plasma membrane	C
GO:0016324	79	0.427	1	0.154	1	apical plasma membrane	C
GO:0016327	85	0.00106	0.091	0.0906	1	apicolateral plasma membrane	C
GO:0016331	55	0.492	1	0.336	1	morphogenesis of embryonic epithelium	P
GO:0016337	188	0.998	1	0.995	1	cell-cell adhesion	P
GO:0016358	44	0.0541	1	0.0462	1	dendrite development	P
GO:0016363	34	0.00689	0.665	0.000111	0.014	nuclear matrix	C
GO:0016407	51	0.000605	0.0385	0.00226	0.197	acetyltransferase activity	F
GO:0016409	11	0.24	1	0.4	1	palmitoyltransferase activity	F
GO:0016410	51	0.00675	0.665	0.0082	0.447	N-acyltransferase activity	F
GO:0016411	10	0.166	1	0.297	1	acylglycerol O-acyltransferase activity	F
GO:0016444	24	0.268	1	0.0175	0.894	somatic cell DNA recombination	P
GO:0016445	25	0.246	1	0.0218	0.894	somatic diversification of immunoglobulins	P
GO:0016447	24	0.268	1	0.0175	0.894	somatic recombination of immunoglobulin gene segments	P
GO:0016458	20	0.00207	0.115	0.00102	0.06	gene silencing	P
GO:0016459	51	0.0199	0.965	0.112	1	myosin complex	C
GO:0016462	704	5.19e-09	0.000884	1.88e-14	0.000377	pyrophosphatase activity	F
GO:0016469	94	0.0348	1	0.214	1	proton-transporting two-sector ATPase complex	C
GO:0016477	300	0.254	1	0.153	1	cell migration	P
GO:0016481	258	5.55e-06	0.003	0.000256	0.019	negative regulation of transcription	P
GO:0016485	97	0.222	1	0.0321	1	protein processing	P
GO:0016491	1125	0.339	1	0.883	1	oxidoreductase activity	F
GO:0016493	34	0.435	1	0.325	1	C-C chemokine receptor activity	F
GO:0016494	31	0.354	1	0.29	1	C-X-C chemokine receptor activity	F
GO:0016500	28	0.977	1	0.999	1	protein-hormone receptor activity	F
GO:0016502	125	0.802	1	0.997	1	nucleotide receptor activity	F
GO:0016503	104	1	1	1	1	pheromone receptor activity	F
GO:0016524	13	0.901	1	0.904	1	latrotoxin receptor activity	F
GO:0016525	16	0.713	1	0.796	1	negative regulation of angiogenesis	P
GO:0016528	15	0.196	1	0.289	1	sarcoplasm	C
GO:0016529	12	0.118	1	0.151	1	sarcoplasmic reticulum	C
GO:0016540	59	0.266	1	0.0545	1	protein autoprocessing	P
GO:0016563	200	5.26e-05	0.013	0.004	0.246	transcriptional activator activity	F
GO:0016564	150	0.00677	0.665	0.00503	0.25	transcriptional repressor activity	F
GO:0016566	17	0.313	1	0.29	1	specific transcriptional repressor activity	F
GO:0016567	78	8.27e-05	0.013	5.13e-06	0.00553	protein ubiquitination	P
GO:0016568	93	2.66e-05	0.00481	4.44e-06	0.00553	chromatin modification	P
GO:0016569	40	0.0552	1	0.00678	0.354	covalent chromatin modification	P
GO:0016570	37	0.118	1	0.02	0.894	histone modification	P
GO:0016571	10	0.0553	1	0.0229	0.894	histone methylation	P
GO:0016575	11	0.362	1	0.34	1	histone deacetylation	P
GO:0016585	19	0.00297	0.118	0.00203	0.197	chromatin remodeling complex	C
GO:0016591	49	0.000856	0.091	0.0211	0.894	DNA-directed RNA polymerase II, holoenzyme	C
GO:0016597	19	0.921	1	0.301	1	amino acid binding	F
GO:0016599	16	0.0971	1	0.00864	0.447	caveolar membrane	C
GO:0016600	16	0.0971	1	0.00864	0.447	flotillin complex	C
GO:0016601	12	0.321	1	0.294	1	Rac protein signal transduction	P
GO:0016604	65	7.49e-08	0.000884	1.43e-05	0.007	nuclear body	C
GO:0016605	19	0.000104	0.025	8.42e-05	0.01	PML body	C
GO:0016607	34	0.000567	0.0385	0.000871	0.06	nuclear speck	C
GO:0016614	136	0.313	1	0.113	1	oxidoreductase activity, acting on CH-OH group of donors	F
GO:0016616	120	0.123	1	0.0659	1	oxidoreductase activity, acting on the CH-OH group of donors, NAD or NADP as acceptor	F
GO:0016620	152	0.999	1	1	1	oxidoreductase activity, acting on the aldehyde or oxo group of donors, NAD or NADP as acceptor	F
GO:0016627	80	0.104	1	0.0801	1	oxidoreductase activity, acting on the CH-CH group of donors	F
GO:0016628	48	0.293	1	0.194	1	oxidoreductase activity, acting on the CH-CH group of donors, NAD or NADP as acceptor	F
GO:0016638	21	0.134	1	0.961	1	oxidoreductase activity, acting on the CH-NH2 group of donors	F
GO:0016641	16	0.406	1	0.981	1	oxidoreductase activity, acting on the CH-NH2 group of donors, oxygen as acceptor	F
GO:0016645	19	0.203	1	0.0628	1	oxidoreductase activity, acting on the CH-NH group of donors	F
GO:0016646	11	0.162	1	0.0299	1	oxidoreductase activity, acting on the CH-NH group of donors, NAD or NADP as acceptor	F
GO:0016651	60	0.61	1	0.838	1	oxidoreductase activity, acting on NADH or NADPH	F
GO:0016655	37	0.529	1	0.804	1	oxidoreductase activity, acting on NADH or NADPH, quinone or similar compound as acceptor	F
GO:0016667	20	0.00169	0.115	0.0133	0.604	oxidoreductase activity, acting on sulfur group of donors	F
GO:0016675	38	0.000804	0.091	0.309	1	oxidoreductase activity, acting on heme group of donors	F
GO:0016676	38	0.000804	0.091	0.309	1	oxidoreductase activity, acting on heme group of donors, oxygen as acceptor	F
GO:0016679	16	0.0887	1	0.0446	1	oxidoreductase activity, acting on diphenols and related substances as donors	F
GO:0016681	16	0.0887	1	0.0446	1	oxidoreductase activity, acting on diphenols and related substances as donors, cytochrome as acceptor	F
GO:0016684	54	0.0827	1	0.0777	1	oxidoreductase activity, acting on peroxide as acceptor	F
GO:0016701	34	0.157	1	0.289	1	oxidoreductase activity, acting on single donors with incorporation of molecular oxygen	F
GO:0016702	33	0.204	1	0.283	1	oxidoreductase activity, acting on single donors with incorporation of molecular oxygen, incorporation of two atoms of oxygen	F
GO:0016705	156	0.949	1	0.989	1	oxidoreductase activity, acting on paired donors, with incorporation or reduction of molecular oxygen	F
GO:0016706	23	0.256	1	0.117	1	oxidoreductase activity, acting on paired donors, with incorporation or reduction of molecular oxygen, 2-oxoglutarate as one donor, and incorporation of one atom each of oxygen into both donors	F
GO:0016709	34	0.761	1	0.753	1	oxidoreductase activity, acting on paired donors, with incorporation or reduction of molecular oxygen, NAD or NADH as one donor, and incorporation of one atom of oxygen	F
GO:0016712	58	0.998	1	1	1	oxidoreductase activity, acting on paired donors, with incorporation or reduction of molecular oxygen, reduced flavin or flavoprotein as one donor, and incorporation of one atom of oxygen	F
GO:0016740	1715	7.23e-10	0	2.45e-15	0.000377	transferase activity	F
GO:0016741	164	0.0515	1	0.13	1	transferase activity, transferring one-carbon groups	F
GO:0016746	163	5.27e-05	0.013	8.81e-05	0.01	transferase activity, transferring acyl groups	F
GO:0016747	139	5.61e-05	0.013	0.000205	0.016	transferase activity, transferring groups other than amino-acyl groups	F
GO:0016755	24	0.191	1	0.22	1	transferase activity, transferring amino-acyl groups	F
GO:0016757	197	0.0855	1	0.0317	1	transferase activity, transferring glycosyl groups	F
GO:0016758	121	0.241	1	0.512	1	transferase activity, transferring hexosyl groups	F
GO:0016763	46	0.0121	0.89	0.00238	0.197	transferase activity, transferring pentosyl groups	F
GO:0016765	50	0.416	1	0.366	1	transferase activity, transferring alkyl or aryl (other than methyl) groups	F
GO:0016769	33	0.406	1	0.0406	1	transferase activity, transferring nitrogenous groups	F
GO:0016772	1032	1.63e-07	0.000884	3.55e-12	0.000377	transferase activity, transferring phosphorus-containing groups	F
GO:0016773	825	0.000248	0.025	2.94e-08	0.000925	phosphotransferase activity, alcohol group as acceptor	F
GO:0016774	10	0.693	1	0.577	1	phosphotransferase activity, carboxyl group as acceptor	F
GO:0016775	15	0.0484	1	0.0741	1	phosphotransferase activity, nitrogenous group as acceptor	F
GO:0016776	29	0.00655	0.665	0.00713	0.354	phosphotransferase activity, phosphate group as acceptor	F
GO:0016779	113	0.000974	0.091	0.0196	0.894	nucleotidyltransferase activity	F
GO:0016780	12	0.357	1	0.195	1	phosphotransferase activity, for other substituted phosphate groups	F
GO:0016782	46	1	1	0.437	1	transferase activity, transferring sulfur-containing groups	F
GO:0016787	2338	7.72e-13	0	3.84e-25	0	hydrolase activity	F
GO:0016788	623	1.82e-05	0.00481	1.14e-12	0.000377	hydrolase activity, acting on ester bonds	F
GO:0016789	115	0.188	1	0.0391	1	carboxylic ester hydrolase activity	F
GO:0016790	86	0.0227	1	2.58e-05	0.007	thiolester hydrolase activity	F
GO:0016791	229	0.00233	0.115	3.25e-07	0.00295	phosphoric monoester hydrolase activity	F
GO:0016796	12	0.0682	1	0.0452	1	exonuclease activity, active with either ribo- or deoxyribonucleic acids and producing 5'-phosphomonoesters	F
GO:0016798	128	0.147	1	0.123	1	hydrolase activity, acting on glycosyl bonds	F
GO:0016799	17	0.256	1	0.534	1	hydrolase activity, hydrolyzing N-glycosyl compounds	F
GO:0016801	10	0.848	1	0.428	1	hydrolase activity, acting on ether bonds	F
GO:0016805	11	0.0178	0.89	0.0408	1	dipeptidase activity	F
GO:0016806	11	0.248	1	0.45	1	dipeptidyl-peptidase and tripeptidyl-peptidase activity	F
GO:0016810	109	0.00917	0.665	0.00433	0.246	hydrolase activity, acting on carbon-nitrogen (but not peptide) bonds	F
GO:0016811	50	0.0289	1	0.00894	0.447	hydrolase activity, acting on carbon-nitrogen (but not peptide) bonds, in linear amides	F
GO:0016813	13	0.226	1	0.609	1	hydrolase activity, acting on carbon-nitrogen (but not peptide) bonds, in linear amidines	F
GO:0016814	28	0.215	1	0.0164	0.894	hydrolase activity, acting on carbon-nitrogen (but not peptide) bonds, in cyclic amidines	F
GO:0016817	722	1.38e-08	0.000884	1.91e-13	0.000377	hydrolase activity, acting on acid anhydrides	F
GO:0016818	710	2.82e-09	0.000884	2.01e-14	0.000377	hydrolase activity, acting on acid anhydrides, in phosphorus-containing anhydrides	F
GO:0016820	155	0.227	1	0.288	1	hydrolase activity, acting on acid anhydrides, catalyzing transmembrane movement of substances	F
GO:0016829	161	0.0828	1	0.0132	0.604	lyase activity	F
GO:0016830	46	0.123	1	0.00349	0.197	carbon-carbon lyase activity	F
GO:0016831	31	0.238	1	0.02	0.894	carboxy-lyase activity	F
GO:0016832	10	0.553	1	0.142	1	aldehyde-lyase activity	F
GO:0016835	60	0.551	1	0.732	1	carbon-oxygen lyase activity	F
GO:0016836	51	0.824	1	0.707	1	hydro-lyase activity	F
GO:0016840	10	0.218	1	0.27	1	carbon-nitrogen lyase activity	F
GO:0016846	12	0.0861	1	0.0299	1	carbon-sulfur lyase activity	F
GO:0016849	23	0.426	1	0.268	1	phosphorus-oxygen lyase activity	F
GO:0016853	145	0.0135	0.89	0.0229	0.894	isomerase activity	F
GO:0016854	14	0.714	1	0.575	1	racemase and epimerase activity	F
GO:0016859	39	0.0658	1	0.213	1	cis-trans isomerase activity	F
GO:0016860	36	0.104	1	0.114	1	intramolecular oxidoreductase activity	F
GO:0016861	11	0.101	1	0.437	1	intramolecular oxidoreductase activity, interconverting aldoses and ketoses	F
GO:0016863	14	0.679	1	0.317	1	intramolecular oxidoreductase activity, transposing C=C bonds	F
GO:0016866	19	0.129	1	0.0603	1	intramolecular transferase activity	F
GO:0016868	10	0.318	1	0.0188	0.894	intramolecular transferase activity, phosphotransferases	F
GO:0016874	341	3.79e-11	0	1.21e-13	0.000377	ligase activity	F
GO:0016875	80	0.00108	0.091	0.00285	0.197	ligase activity, forming carbon-oxygen bonds	F
GO:0016876	80	0.00108	0.091	0.00285	0.197	ligase activity, forming aminoacyl-tRNA and related compounds	F
GO:0016877	15	0.639	1	0.179	1	ligase activity, forming carbon-sulfur bonds	F
GO:0016878	10	0.63	1	0.226	1	acid-thiol ligase activity	F
GO:0016879	200	2.97e-09	0.000884	2.92e-10	0.000377	ligase activity, forming carbon-nitrogen bonds	F
GO:0016881	167	2.57e-09	0.000884	2.12e-10	0.000377	acid-amino acid ligase activity	F
GO:0016884	11	0.218	1	0.59	1	carbon-nitrogen ligase activity, with glutamine as amido-N-donor	F
GO:0016886	14	0.166	1	0.477	1	ligase activity, forming phosphoric ester bonds	F
GO:0016887	366	0.000337	0.0385	1.52e-06	0.005	ATPase activity	F
GO:0016891	15	0.0103	0.665	0.00443	0.246	endoribonuclease activity, producing 5'-phosphomonoesters	F
GO:0016892	24	0.926	1	0.981	1	endoribonuclease activity, producing 3'-phosphomonoesters	F
GO:0016893	18	0.00191	0.115	0.000772	0.058	endonuclease activity, active with either ribo- or deoxyribonucleic acids and producing 5'-phosphomonoesters	F
GO:0016894	27	0.457	1	0.814	1	endonuclease activity, active with either ribo- or deoxyribonucleic acids and producing 3'-phosphomonoesters	F
GO:0016896	11	0.0671	1	0.0315	1	exoribonuclease activity, producing 5'-phosphomonoesters	F
GO:0016903	163	0.998	1	1	1	oxidoreductase activity, acting on the aldehyde or oxo group of donors	F
GO:0016917	103	1	1	1	1	GABA receptor activity	F
GO:0016998	15	0.85	1	0.208	1	cell wall catabolism	P
GO:0017004	20	0.845	1	0.974	1	cytochrome complex assembly	P
GO:0017015	20	0.226	1	0.194	1	regulation of transforming growth factor beta receptor signaling pathway	P
GO:0017016	44	0.242	1	0.00727	0.354	Ras GTPase binding	F
GO:0017017	12	0.921	1	0.781	1	MAP kinase phosphatase activity	F
GO:0017022	13	0.128	1	0.00939	0.447	myosin binding	F
GO:0017038	88	0.000233	0.025	7.12e-05	0.01	protein import	P
GO:0017046	16	0.64	1	0.474	1	peptide hormone binding	F
GO:0017048	21	0.424	1	0.0524	1	Rho GTPase binding	F
GO:0017076	1915	4.27e-17	0	4.1e-27	0	purine nucleotide binding	F
GO:0017111	684	2.46e-08	0.000884	3.81e-14	0.000377	nucleoside-triphosphatase activity	F
GO:0017124	22	0.927	1	0.641	1	SH3 domain binding	F
GO:0017137	17	0.206	1	0.031	1	Rab GTPase binding	F
GO:0017144	12	0.269	1	0.892	1	drug metabolism	P
GO:0017148	32	0.00665	0.665	0.0157	0.894	negative regulation of protein biosynthesis	P
GO:0017153	66	0.269	1	0.64	1	sodium:dicarboxylate symporter activity	F
GO:0017156	19	0.312	1	0.413	1	calcium ion-dependent exocytosis	P
GO:0017157	19	0.012	0.89	0.0291	1	regulation of exocytosis	P
GO:0018024	13	0.0286	1	0.126	1	histone-lysine N-methyltransferase activity	F
GO:0018105	13	0.0943	1	0.0192	0.894	peptidyl-serine phosphorylation	P
GO:0018108	69	0.539	1	0.00705	0.354	peptidyl-tyrosine phosphorylation	P
GO:0018149	21	0.876	1	0.363	1	peptide cross-linking	P
GO:0018193	125	0.0018	0.115	2.59e-06	0.005	peptidyl-amino acid modification	P
GO:0018209	16	0.112	1	0.0409	1	peptidyl-serine modification	P
GO:0018210	11	0.279	1	0.132	1	peptidyl-threonine modification	P
GO:0018212	69	0.539	1	0.00705	0.354	peptidyl-tyrosine modification	P
GO:0018298	11	0.465	1	0.661	1	protein-chromophore linkage	P
GO:0018958	74	0.451	1	0.286	1	phenol metabolism	P
GO:0019001	371	9.05e-06	0.003	2.44e-09	0.000377	guanyl nucleotide binding	F
GO:0019012	16	0.21	1	0.18	1	virion	C
GO:0019028	15	0.19	1	0.169	1	viral capsid	C
GO:0019058	16	0.892	1	0.49	1	viral infectious cycle	P
GO:0019098	17	0.999	1	0.805	1	reproductive behavior	P
GO:0019104	11	0.128	1	0.157	1	DNA N-glycosylase activity	F
GO:0019199	111	0.839	1	0.692	1	transmembrane receptor protein kinase activity	F
GO:0019200	32	0.00615	0.327	0.0454	1	carbohydrate kinase activity	F
GO:0019201	12	0.0278	1	0.117	1	nucleotide kinase activity	F
GO:0019202	10	0.522	1	0.639	1	amino acid kinase activity	F
GO:0019205	35	0.000501	0.0385	0.00198	0.197	nucleobase, nucleoside, nucleotide kinase activity	F
GO:0019207	76	0.0848	1	0.00105	0.06	kinase regulator activity	F
GO:0019208	40	0.52	1	0.139	1	phosphatase regulator activity	F
GO:0019209	12	0.292	1	0.052	1	kinase activator activity	F
GO:0019210	20	0.0329	1	0.000125	0.014	kinase inhibitor activity	F
GO:0019212	17	0.725	1	0.325	1	phosphatase inhibitor activity	F
GO:0019213	21	0.0306	1	0.0591	1	deacetylase activity	F
GO:0019216	35	0.218	1	0.0142	0.894	regulation of lipid metabolism	P
GO:0019217	13	0.449	1	0.0283	1	regulation of fatty acid metabolism	P
GO:0019218	15	0.312	1	0.259	1	regulation of steroid metabolism	P
GO:0019219	1933	6.48e-13	0	1e-17	0.000377	regulation of nucleobase, nucleoside, nucleotide and nucleic acid metabolism	P
GO:0019220	89	0.0714	1	0.00479	0.25	regulation of phosphate metabolism	P
GO:0019221	35	0.929	1	0.685	1	cytokine and chemokine mediated signaling pathway	P
GO:0019222	2255	3.41e-17	0	1.66e-24	0	regulation of metabolism	P
GO:0019226	282	0.0562	1	0.249	1	transmission of nerve impulse	P
GO:0019229	13	0.711	1	0.904	1	regulation of vasoconstriction	P
GO:0019233	34	0.984	1	1	1	sensory perception of pain	P
GO:0019236	10	1	1	1	1	response to pheromone	P
GO:0019239	22	0.856	1	0.224	1	deaminase activity	F
GO:0019290	42	0.255	1	0.116	1	siderophore biosynthesis	P
GO:0019318	296	0.929	1	0.862	1	hexose metabolism	P
GO:0019319	27	0.423	1	0.0387	1	hexose biosynthesis	P
GO:0019320	220	0.993	1	0.997	1	hexose catabolism	P
GO:0019362	23	0.00019	0.025	0.0334	1	pyridine nucleotide metabolism	P
GO:0019363	11	0.0946	1	0.288	1	pyridine nucleotide biosynthesis	P
GO:0019370	11	0.658	1	0.738	1	leukotriene biosynthesis	P
GO:0019395	24	0.16	1	0.069	1	fatty acid oxidation	P
GO:0019438	56	0.136	1	0.0466	1	aromatic compound biosynthesis	P
GO:0019439	14	0.338	1	0.0863	1	aromatic compound catabolism	P
GO:0019538	3948	1.33e-30	0	5.82e-36	0	protein metabolism	P
GO:0019540	42	0.255	1	0.116	1	siderophore biosynthesis from catechol	P
GO:0019717	55	0.000552	0.0385	0.00145	0.0938	synaptosome	C
GO:0019722	45	0.0103	0.665	0.161	1	calcium-mediated signaling	P
GO:0019724	102	0.109	1	0.15	1	B cell mediated immunity	P
GO:0019725	273	0.00545	0.286	0.00259	0.197	cell homeostasis	P
GO:0019748	88	0.112	1	0.0259	1	secondary metabolism	P
GO:0019751	29	0.339	1	0.0863	1	polyol metabolism	P
GO:0019752	553	1.11e-05	0.00481	7.28e-08	0.000966	carboxylic acid metabolism	P
GO:0019783	66	0.0034	0.186	1.32e-05	0.007	small conjugating protein-specific protease activity	F
GO:0019787	146	7.19e-09	0.000884	4.32e-10	0.000377	small conjugating protein ligase activity	F
GO:0019825	20	0.194	1	0.14	1	oxygen binding	F
GO:0019827	18	0.301	1	0.353	1	stem cell maintenance	P
GO:0019829	60	0.0178	0.89	0.0774	1	cation-transporting ATPase activity	F
GO:0019835	14	0.161	1	0.317	1	cytolysis	P
GO:0019838	88	0.993	1	0.982	1	growth factor binding	F
GO:0019840	12	0.483	1	0.319	1	isoprenoid binding	F
GO:0019842	133	0.0223	1	0.0225	0.894	vitamin binding	F
GO:0019843	21	0.000451	0.0385	0.0136	0.604	rRNA binding	F
GO:0019861	70	0.48	1	0.263	1	flagellum	C
GO:0019865	10	0.19	1	0.3	1	immunoglobulin binding	F
GO:0019866	264	4.57e-06	0.003	0.000348	0.034	organelle inner membrane	C
GO:0019867	63	0.0155	0.89	0.000146	0.014	outer membrane	C
GO:0019882	90	0.499	1	0.616	1	antigen processing and presentation	P
GO:0019884	17	0.0216	1	0.0469	1	antigen processing and presentation of exogenous antigen	P
GO:0019886	10	0.0458	1	0.0658	1	antigen processing and presentation of exogenous peptide antigen via MHC class II	P
GO:0019887	61	0.0542	1	0.000386	0.034	protein kinase regulator activity	F
GO:0019888	38	0.537	1	0.139	1	protein phosphatase regulator activity	F
GO:0019897	36	0.232	1	0.146	1	extrinsic to plasma membrane	C
GO:0019898	91	0.53	1	0.233	1	extrinsic to membrane	C
GO:0019899	223	0.00235	0.115	4.52e-09	0.000885	enzyme binding	F
GO:0019900	82	0.132	1	0.00053	0.034	kinase binding	F
GO:0019901	65	0.0886	1	0.000385	0.034	protein kinase binding	F
GO:0019902	16	0.646	1	0.187	1	phosphatase binding	F
GO:0019903	12	0.592	1	0.141	1	protein phosphatase binding	F
GO:0019904	142	0.00364	0.186	0.000284	0.019	protein domain specific binding	F
GO:0019905	20	0.874	1	0.785	1	syntaxin binding	F
GO:0019915	11	0.0422	1	0.043	1	sequestering of lipid	P
GO:0019932	157	0.021	1	0.172	1	second-messenger-mediated signaling	P
GO:0019933	58	0.382	1	0.607	1	cAMP-mediated signaling	P
GO:0019935	62	0.335	1	0.458	1	cyclic-nucleotide-mediated signaling	P
GO:0019941	165	3.62e-05	0.00481	2.99e-09	0.000377	modification-dependent protein catabolism	P
GO:0019953	272	0.000373	0.0385	7.53e-06	0.00553	sexual reproduction	P
GO:0019955	103	0.803	1	0.946	1	cytokine binding	F
GO:0019956	45	0.487	1	0.36	1	chemokine binding	F
GO:0019957	34	0.435	1	0.325	1	C-C chemokine binding	F
GO:0019958	32	0.405	1	0.356	1	C-X-C chemokine binding	F
GO:0019965	50	0.982	1	0.996	1	interleukin binding	F
GO:0019966	29	1	1	1	1	interleukin-1 binding	F
GO:0019992	26	0.22	1	0.0235	0.894	diacylglycerol binding	F
GO:0020037	202	0.888	1	0.997	1	heme binding	F
GO:0021510	34	0.206	1	0.999	1	spinal cord development	P
GO:0021515	24	0.291	1	0.993	1	cell differentiation in spinal cord	P
GO:0021516	11	0.33	1	0.993	1	dorsal spinal cord development	P
GO:0021517	16	0.292	1	0.973	1	ventral spinal cord development	P
GO:0021522	14	0.319	1	0.997	1	spinal cord motor neuron differentiation	P
GO:0021532	11	0.512	1	0.454	1	neural tube patterning	P
GO:0021533	12	0.105	1	0.481	1	cell differentiation in hindbrain	P
GO:0021536	27	0.57	1	0.809	1	diencephalon development	P
GO:0021537	48	0.519	1	0.319	1	telencephalon development	P
GO:0021543	35	0.23	1	0.123	1	pallium development	P
GO:0021545	14	0.863	1	0.828	1	cranial nerve development	P
GO:0021549	26	0.0408	1	0.733	1	cerebellum development	P
GO:0021575	19	0.0204	0.965	0.583	1	hindbrain morphogenesis	P
GO:0021587	17	0.0103	0.665	0.498	1	cerebellum morphogenesis	P
GO:0021675	17	0.788	1	0.803	1	nerve development	P
GO:0021680	10	0.109	1	0.249	1	cerebellar Purkinje cell layer development	P
GO:0021695	18	0.0176	0.89	0.362	1	cerebellar cortex development	P
GO:0021696	15	0.0151	0.89	0.309	1	cerebellar cortex morphogenesis	P
GO:0021697	11	0.073	1	0.448	1	cerebellar cortex formation	P
GO:0021700	81	0.0594	1	0.193	1	developmental maturation	P
GO:0021761	21	0.12	1	0.182	1	limbic system development	P
GO:0021766	17	0.0615	1	0.108	1	hippocampus development	P
GO:0021782	16	0.536	1	0.84	1	glial cell development	P
GO:0021795	11	0.958	1	0.798	1	cerebral cortex cell migration	P
GO:0021872	12	0.419	1	0.694	1	generation of neurons in the forebrain	P
GO:0021879	10	0.383	1	0.608	1	forebrain neuron differentiation	P
GO:0021885	14	0.97	1	0.951	1	forebrain cell migration	P
GO:0021895	12	0.0964	1	0.257	1	cerebral cortex neuron differentiation	P
GO:0021915	49	0.145	1	0.124	1	neural tube development	P
GO:0021952	10	0.912	1	0.997	1	central nervous system projection neuron axonogenesis	P
GO:0021953	34	0.186	1	0.875	1	central nervous system neuron differentiation	P
GO:0021954	28	0.147	1	0.885	1	central nervous system neuron development	P
GO:0021955	12	0.661	1	0.8	1	central nervous system neuron axonogenesis	P
GO:0021983	21	0.633	1	0.841	1	pituitary gland development	P
GO:0021987	25	0.349	1	0.102	1	cerebral cortex development	P
GO:0022008	398	0.0416	1	0.141	1	neurogenesis	P
GO:0022029	13	0.936	1	0.913	1	telencephalon cell migration	P
GO:0022037	31	0.0226	1	0.728	1	metencephalon development	P
GO:0030001	513	0.00275	0.118	0.00856	0.447	metal ion transport	P
GO:0030003	158	0.0517	1	0.0244	1	cation homeostasis	P
GO:0030004	12	0.0669	1	0.00892	0.447	monovalent inorganic cation homeostasis	P
GO:0030005	144	0.173	1	0.106	1	di-, tri-valent inorganic cation homeostasis	P
GO:0030016	59	0.258	1	0.144	1	myofibril	C
GO:0030017	53	0.425	1	0.104	1	sarcomere	C
GO:0030018	26	0.246	1	0.0122	0.604	Z disc	C
GO:0030027	42	0.032	1	0.00759	0.354	lamellipodium	C
GO:0030029	177	8.49e-05	0.013	7.12e-07	0.00295	actin filament-based process	P
GO:0030030	282	0.0392	1	0.0493	1	cell projection organization and biogenesis	P
GO:0030031	69	0.00251	0.115	0.00106	0.06	cell projection biogenesis	P
GO:0030032	13	0.512	1	0.174	1	lamellipodium biogenesis	P
GO:0030035	15	0.0327	1	0.0637	1	microspike biogenesis	P
GO:0030036	162	0.000194	0.025	1.59e-06	0.005	actin cytoskeleton organization and biogenesis	P
GO:0030041	24	0.0462	1	0.00126	0.06	actin filament polymerization	P
GO:0030042	10	0.0421	1	0.0792	1	actin filament depolymerization	P
GO:0030048	10	0.116	1	0.0275	1	actin filament-based movement	P
GO:0030054	355	0.0193	0.965	0.148	1	cell junction	C
GO:0030055	60	0.185	1	0.763	1	cell-matrix junction	C
GO:0030072	45	0.458	1	0.212	1	peptide hormone secretion	P
GO:0030073	41	0.482	1	0.281	1	insulin secretion	P
GO:0030097	194	0.000308	0.025	0.00128	0.06	hemopoiesis	P
GO:0030098	85	0.0026	0.118	0.00477	0.25	lymphocyte differentiation	P
GO:0030099	97	0.00459	0.26	0.0907	1	myeloid cell differentiation	P
GO:0030100	34	0.0475	1	0.00137	0.0938	regulation of endocytosis	P
GO:0030111	52	0.0184	0.965	0.114	1	regulation of Wnt receptor signaling pathway	P
GO:0030117	66	0.00872	0.665	3.47e-07	0.00295	membrane coat	C
GO:0030118	33	0.0209	1	3.9e-05	0.008	clathrin coat	C
GO:0030119	25	0.0659	1	0.00116	0.06	membrane coat adaptor complex	C
GO:0030120	21	0.0493	1	0.000426	0.034	vesicle coat	C
GO:0030131	25	0.0659	1	0.00116	0.06	clathrin adaptor complex	C
GO:0030133	35	0.0251	1	0.000495	0.034	transport vesicle	C
GO:0030135	106	0.0102	0.665	9.68e-05	0.014	coated vesicle	C
GO:0030136	90	0.0139	0.89	0.00251	0.197	clathrin-coated vesicle	C
GO:0030139	16	0.569	1	0.0677	1	endocytic vesicle	C
GO:0030140	14	0.0189	0.965	0.0106	0.447	trans-Golgi network transport vesicle	C
GO:0030141	46	0.221	1	0.0134	0.604	secretory granule	C
GO:0030145	83	0.0255	1	0.00188	0.197	manganese ion binding	F
GO:0030154	1102	4.79e-06	0.003	5.36e-05	0.008	cell differentiation	P
GO:0030155	50	0.469	1	0.134	1	regulation of cell adhesion	P
GO:0030162	12	0.403	1	0.825	1	regulation of proteolysis	P
GO:0030163	212	3.45e-07	0.000885	1.87e-10	0.000377	protein catabolism	P
GO:0030165	33	0.895	1	0.551	1	PDZ domain binding	F
GO:0030166	17	0.86	1	0.942	1	proteoglycan biosynthesis	P
GO:0030168	12	0.123	1	0.543	1	platelet activation	P
GO:0030170	58	0.0611	1	0.0364	1	pyridoxal phosphate binding	F
GO:0030173	23	0.213	1	0.0906	1	integral to Golgi membrane	C
GO:0030175	11	0.0539	1	0.24	1	filopodium	C
GO:0030176	29	0.0473	1	0.00185	0.197	integral to endoplasmic reticulum membrane	C
GO:0030177	30	0.00804	0.665	0.00671	0.354	positive regulation of Wnt receptor signaling pathway	P
GO:0030178	18	0.492	1	0.913	1	negative regulation of Wnt receptor signaling pathway	P
GO:0030182	324	0.133	1	0.47	1	neuron differentiation	P
GO:0030183	37	0.108	1	0.0968	1	B cell differentiation	P
GO:0030193	14	0.203	1	0.763	1	regulation of blood coagulation	P
GO:0030198	79	0.102	1	0.207	1	extracellular matrix organization and biogenesis	P
GO:0030199	18	0.686	1	0.887	1	collagen fibril organization	P
GO:0030203	24	0.33	1	0.408	1	glycosaminoglycan metabolism	P
GO:0030216	22	0.159	1	0.0454	1	keratinocyte differentiation	P
GO:0030217	61	0.00616	0.327	0.00333	0.197	T cell differentiation	P
GO:0030218	40	0.0645	1	0.0971	1	erythrocyte differentiation	P
GO:0030225	11	0.0894	1	0.459	1	macrophage differentiation	P
GO:0030234	700	0.00331	0.186	6.23e-07	0.00295	enzyme regulator activity	F
GO:0030239	13	0.171	1	0.286	1	myofibril assembly	P
GO:0030246	303	1	1	0.956	1	carbohydrate binding	F
GO:0030247	69	0.857	1	0.233	1	polysaccharide binding	F
GO:0030258	31	0.29	1	0.00138	0.0938	lipid modification	P
GO:0030261	14	0.063	1	0.00144	0.0938	chromosome condensation	P
GO:0030262	13	0.0401	1	0.0771	1	apoptotic nuclear changes	P
GO:0030278	36	0.41	1	0.159	1	regulation of ossification	P
GO:0030279	11	0.401	1	0.0963	1	negative regulation of ossification	P
GO:0030282	34	0.185	1	0.0267	1	bone mineralization	P
GO:0030286	28	0.0868	1	0.00734	0.354	dynein complex	C
GO:0030288	26	0.998	1	0.97	1	periplasmic space (sensu Proteobacteria)	C
GO:0030301	22	0.556	1	0.607	1	cholesterol transport	P
GO:0030308	41	0.028	1	0.000133	0.014	negative regulation of cell growth	P
GO:0030312	30	0.937	1	0.8	1	external encapsulating structure	C
GO:0030313	29	0.975	1	0.873	1	cell envelope	C
GO:0030315	16	0.698	1	0.86	1	T-tubule	C
GO:0030316	16	0.114	1	0.787	1	osteoclast differentiation	P
GO:0030317	27	0.501	1	0.758	1	sperm motility	P
GO:0030318	20	0.0989	1	0.66	1	melanocyte differentiation	P
GO:0030321	12	0.624	1	0.937	1	transepithelial chloride transport	P
GO:0030323	82	0.272	1	0.372	1	respiratory tube development	P
GO:0030324	80	0.272	1	0.398	1	lung development	P
GO:0030326	68	0.957	1	0.838	1	embryonic limb morphogenesis	P
GO:0030330	13	0.11	1	0.00073	0.058	DNA damage response, signal transduction by p53 class mediator	P
GO:0030334	73	0.267	1	0.298	1	regulation of cell migration	P
GO:0030335	33	0.172	1	0.268	1	positive regulation of cell migration	P
GO:0030336	21	0.0553	1	0.14	1	negative regulation of cell migration	P
GO:0030374	26	0.529	1	0.185	1	ligand-dependent nuclear receptor transcription coactivator activity	F
GO:0030375	21	0.883	1	0.431	1	thyroid hormone receptor coactivator activity	F
GO:0030384	44	0.00869	0.665	0.000938	0.06	phosphoinositide metabolism	P
GO:0030414	187	0.999	1	1	1	protease inhibitor activity	F
GO:0030424	73	0.258	1	0.429	1	axon	C
GO:0030425	84	0.613	1	0.117	1	dendrite	C
GO:0030426	37	0.162	1	0.0756	1	growth cone	C
GO:0030427	37	0.162	1	0.0756	1	site of polarized growth	C
GO:0030433	11	0.0292	1	8.68e-07	0.00295	ER-associated protein catabolism	P
GO:0030500	23	0.187	1	0.0706	1	regulation of bone mineralization	P
GO:0030501	14	0.478	1	0.101	1	positive regulation of bone mineralization	P
GO:0030509	37	0.779	1	0.289	1	BMP signaling pathway	P
GO:0030510	19	0.966	1	0.752	1	regulation of BMP signaling pathway	P
GO:0030512	10	0.266	1	0.34	1	negative regulation of transforming growth factor beta receptor signaling pathway	P
GO:0030514	13	0.849	1	0.617	1	negative regulation of BMP signaling pathway	P
GO:0030516	14	0.174	1	0.138	1	regulation of axon extension	P
GO:0030518	25	0.192	1	0.04	1	steroid hormone receptor signaling pathway	P
GO:0030521	12	0.0514	1	0.0903	1	androgen receptor signaling pathway	P
GO:0030522	35	0.196	1	0.015	0.894	intracellular receptor-mediated signaling pathway	P
GO:0030528	1185	4.36e-12	0	2.67e-09	0.000377	transcription regulator activity	F
GO:0030529	993	2.25e-12	0	0.00222	0.197	ribonucleoprotein complex	C
GO:0030534	80	0.0719	1	0.363	1	adult behavior	P
GO:0030539	13	0.993	1	0.963	1	male genitalia development	P
GO:0030545	12	0.97	1	0.972	1	receptor regulator activity	F
GO:0030551	19	0.664	1	0.683	1	cyclic nucleotide binding	F
GO:0030552	14	0.299	1	0.737	1	cAMP binding	F
GO:0030554	1598	2.43e-14	0	8.83e-21	0.000377	adenyl nucleotide binding	F
GO:0030593	15	0.283	1	0.48	1	neutrophil chemotaxis	P
GO:0030594	198	0.694	1	0.981	1	neurotransmitter receptor activity	F
GO:0030595	23	0.681	1	0.768	1	leukocyte chemotaxis	P
GO:0030658	13	0.214	1	0.0641	1	transport vesicle membrane	C
GO:0030659	60	0.0948	1	0.0054	0.281	cytoplasmic vesicle membrane	C
GO:0030660	14	0.182	1	0.0381	1	Golgi-associated vesicle membrane	C
GO:0030662	23	0.07	1	0.000714	0.058	coated vesicle membrane	C
GO:0030665	10	0.0824	1	0.0303	1	clathrin coated vesicle membrane	C
GO:0030672	14	0.817	1	0.539	1	synaptic vesicle membrane	C
GO:0030674	20	0.315	1	0.709	1	protein binding, bridging	F
GO:0030693	16	0.232	1	0.685	1	caspase activity	F
GO:0030695	304	0.0234	1	1.48e-06	0.005	GTPase regulator activity	F
GO:0030705	119	0.000523	0.0385	0.000339	0.034	cytoskeleton-dependent intracellular transport	P
GO:0030728	11	0.883	1	0.839	1	ovulation	P
GO:0030799	15	0.264	1	0.135	1	regulation of cyclic nucleotide metabolism	P
GO:0030802	11	0.221	1	0.288	1	regulation of cyclic nucleotide biosynthesis	P
GO:0030808	11	0.221	1	0.288	1	regulation of nucleotide biosynthesis	P
GO:0030814	10	0.23	1	0.118	1	regulation of cAMP metabolism	P
GO:0030832	31	0.00228	0.115	0.000446	0.034	regulation of actin filament length	P
GO:0030833	19	0.023	1	0.00658	0.354	regulation of actin filament polymerization	P
GO:0030834	10	0.0421	1	0.0792	1	regulation of actin filament depolymerization	P
GO:0030835	10	0.0421	1	0.0792	1	negative regulation of actin filament depolymerization	P
GO:0030855	51	0.282	1	0.176	1	epithelial cell differentiation	P
GO:0030856	10	0.908	1	0.882	1	regulation of epithelial cell differentiation	P
GO:0030863	25	0.0322	1	0.00016	0.016	cortical cytoskeleton	C
GO:0030864	16	0.0765	1	0.00417	0.246	cortical actin cytoskeleton	C
GO:0030865	13	0.0313	1	0.00711	0.354	cortical cytoskeleton organization and biogenesis	P
GO:0030866	12	0.0351	1	0.00965	0.447	cortical actin cytoskeleton organization and biogenesis	P
GO:0030878	12	0.712	1	0.97	1	thyroid gland development	P
GO:0030879	32	0.688	1	0.908	1	mammary gland development	P
GO:0030888	19	0.624	1	0.243	1	regulation of B cell proliferation	P
GO:0030890	14	0.56	1	0.233	1	positive regulation of B cell proliferation	P
GO:0030900	121	0.246	1	0.0825	1	forebrain development	P
GO:0030901	13	0.415	1	0.943	1	midbrain development	P
GO:0030902	52	0.152	1	0.933	1	hindbrain development	P
GO:0030955	94	0.994	1	0.972	1	potassium ion binding	F
GO:0030968	15	0.00335	0.186	0.0107	0.447	unfolded protein response	P
GO:0030983	12	0.34	1	0.023	0.894	mismatched DNA binding	F
GO:0031012	230	0.548	1	0.672	1	extracellular matrix	C
GO:0031016	19	0.428	1	0.941	1	pancreas development	P
GO:0031018	11	0.543	1	0.906	1	endocrine pancreas development	P
GO:0031023	12	0.00671	0.665	3.54e-06	0.00553	microtubule organizing center organization and biogenesis	P
GO:0031032	12	0.609	1	0.169	1	actomyosin structure organization and biogenesis	P
GO:0031069	14	0.284	1	0.419	1	hair follicle morphogenesis	P
GO:0031072	74	0.0328	1	0.0387	1	heat shock protein binding	F
GO:0031090	917	2.37e-14	0	3.36e-17	0.000377	organelle membrane	C
GO:0031098	41	0.189	1	0.397	1	stress-activated protein kinase signaling pathway	P
GO:0031099	31	0.74	1	0.163	1	regeneration	P
GO:0031109	31	0.124	1	0.0159	0.894	microtubule polymerization or depolymerization	P
GO:0031110	28	0.146	1	0.031	1	regulation of microtubule polymerization or depolymerization	P
GO:0031111	16	0.00155	0.115	0.00147	0.0938	negative regulation of microtubule polymerization or depolymerization	P
GO:0031112	13	0.927	1	0.585	1	positive regulation of microtubule polymerization or depolymerization	P
GO:0031113	13	0.815	1	0.495	1	regulation of microtubule polymerization	P
GO:0031114	15	0.00313	0.186	0.00247	0.197	regulation of microtubule depolymerization	P
GO:0031116	12	0.909	1	0.581	1	positive regulation of microtubule polymerization	P
GO:0031128	13	0.44	1	0.641	1	induction	P
GO:0031175	206	0.308	1	0.535	1	neurite development	P
GO:0031177	27	0.233	1	0.188	1	phosphopantetheine binding	F
GO:0031214	164	0.796	1	0.573	1	biomineral formation	P
GO:0031224	4394	1	1	1	1	intrinsic to membrane	C
GO:0031225	15	0.971	1	0.488	1	anchored to membrane	C
GO:0031226	354	0.677	1	0.226	1	intrinsic to plasma membrane	C
GO:0031227	40	0.0327	1	0.0409	1	intrinsic to endoplasmic reticulum membrane	C
GO:0031228	23	0.213	1	0.0906	1	intrinsic to Golgi membrane	C
GO:0031252	67	0.00657	0.665	0.000276	0.019	leading edge	C
GO:0031253	14	0.373	1	0.0305	1	cell projection membrane	C
GO:0031267	47	0.13	1	0.00138	0.0938	small GTPase binding	F
GO:0031279	12	0.802	1	0.216	1	regulation of cyclase activity	P
GO:0031290	11	1	1	0.901	1	retinal ganglion cell axon guidance	P
GO:0031300	79	0.0038	0.186	0.00284	0.197	intrinsic to organelle membrane	C
GO:0031301	65	0.00456	0.26	0.000231	0.016	integral to organelle membrane	C
GO:0031323	2113	3.25e-14	0	2e-19	0.000377	regulation of cellular metabolism	P
GO:0031324	331	2.2e-07	0.000884	2.5e-06	0.005	negative regulation of cellular metabolism	P
GO:0031325	481	6.88e-07	0.002	7.34e-06	0.00553	positive regulation of cellular metabolism	P
GO:0031326	140	0.0911	1	0.00573	0.354	regulation of cellular biosynthesis	P
GO:0031327	36	0.00495	0.26	0.00324	0.197	negative regulation of cellular biosynthesis	P
GO:0031328	56	0.27	1	0.108	1	positive regulation of cellular biosynthesis	P
GO:0031341	19	0.626	1	0.811	1	regulation of cell killing	P
GO:0031396	11	0.415	1	0.0507	1	regulation of protein ubiquitination	P
GO:0031399	12	0.478	1	0.0273	1	regulation of protein modification	P
GO:0031402	72	0.465	1	0.857	1	sodium ion binding	F
GO:0031404	39	0.911	1	0.842	1	chloride ion binding	F
GO:0031410	333	2.69e-08	0.000884	1.35e-17	0.000377	cytoplasmic vesicle	C
GO:0031418	10	0.316	1	0.812	1	L-ascorbic acid binding	F
GO:0031420	159	0.97	1	0.981	1	alkali metal ion binding	F
GO:0031424	13	0.467	1	0.175	1	keratinization	P
GO:0031461	13	0.0924	1	0.00719	0.354	cullin-RING ubiquitin ligase complex	C
GO:0031497	179	0.204	1	0.707	1	chromatin assembly	P
GO:0031507	13	0.00715	0.665	0.00438	0.246	heterochromatin formation	P
GO:0031513	25	0.645	1	0.111	1	nonmotile primary cilium	C
GO:0031526	10	0.599	1	0.187	1	brush border membrane	C
GO:0031570	18	0.0287	1	0.0136	0.604	DNA integrity checkpoint	P
GO:0031589	85	0.0802	1	0.0155	0.894	cell-substrate adhesion	P
GO:0031594	15	0.494	1	0.218	1	neuromuscular junction	C
GO:0031625	15	0.0416	1	0.0362	1	ubiquitin protein ligase binding	F
GO:0031644	92	0.413	1	0.624	1	regulation of neurophysiological process	P
GO:0031645	15	0.411	1	0.602	1	negative regulation of neurophysiological process	P
GO:0031646	30	0.46	1	0.905	1	positive regulation of neurophysiological process	P
GO:0031647	17	0.819	1	0.0108	0.447	regulation of protein stability	P
GO:0031667	88	0.000553	0.0385	0.000171	0.016	response to nutrient levels	P
GO:0031668	24	0.0394	1	0.0736	1	cellular response to extracellular stimulus	P
GO:0031669	15	0.0515	1	0.165	1	cellular response to nutrient levels	P
GO:0031672	10	0.914	1	0.489	1	A band	C
GO:0031902	11	0.1	1	0.0569	1	late endosome membrane	C
GO:0031903	30	0.0103	0.665	0.0619	1	microbody membrane	C
GO:0031941	15	0.261	1	0.145	1	filamentous actin	C
GO:0031965	94	0.000116	0.025	8.15e-07	0.00295	nuclear membrane	C
GO:0031966	316	1.62e-07	0.000884	1.73e-05	0.007	mitochondrial membrane	C
GO:0031967	471	6.2e-11	0	3.81e-11	0.000377	organelle envelope	C
GO:0031968	58	0.0309	1	0.000335	0.034	organelle outer membrane	C
GO:0031970	31	0.0811	1	0.0815	1	organelle envelope lumen	C
GO:0031974	662	6.59e-23	0	2.78e-21	0.000377	membrane-enclosed lumen	C
GO:0031975	498	1.19e-09	0.000884	3.13e-10	0.000377	envelope	C
GO:0031980	108	0.00153	0.115	0.000286	0.019	mitochondrial lumen	C
GO:0031981	485	6.17e-20	0	3.36e-17	0.000377	nuclear lumen	C
GO:0031982	346	5.42e-08	0.000884	3.58e-18	0.000377	vesicle	C
GO:0031988	288	1.43e-07	0.000884	4.89e-15	0.000377	membrane-bound vesicle	C
GO:0032011	16	0.654	1	0.116	1	ARF protein signal transduction	P
GO:0032012	16	0.654	1	0.116	1	regulation of ARF protein signal transduction	P
GO:0032094	11	0.918	1	0.328	1	response to food	P
GO:0032147	48	0.112	1	0.116	1	activation of protein kinase activity	P
GO:0032200	17	0.0642	1	0.0227	0.894	telomere organization and biogenesis	P
GO:0032259	77	0.85	1	0.119	1	methylation	P
GO:0032312	20	0.334	1	0.084	1	regulation of ARF GTPase activity	P
GO:0032313	40	0.0509	1	0.0134	0.604	regulation of Rab GTPase activity	P
GO:0032318	67	0.0556	1	0.00855	0.447	regulation of Ras GTPase activity	P
GO:0032392	14	0.0801	1	0.0646	1	DNA geometric change	P
GO:0032403	70	0.125	1	0.0544	1	protein complex binding	F
GO:0032432	20	0.00325	0.186	0.000632	0.042	actin filament bundle	C
GO:0035004	10	0.317	1	0.0517	1	phosphoinositide 3-kinase activity	F
GO:0035023	68	0.231	1	0.00705	0.354	regulation of Rho protein signal transduction	P
GO:0035036	19	0.334	1	0.259	1	sperm-egg recognition	P
GO:0035050	10	0.0741	1	0.622	1	embryonic heart tube development	P
GO:0035051	17	0.967	1	0.674	1	cardiac cell differentiation	P
GO:0035091	120	0.00453	0.26	8.18e-05	0.01	phosphoinositide binding	F
GO:0035094	13	0.162	1	0.246	1	response to nicotine	P
GO:0035107	74	0.955	1	0.868	1	appendage morphogenesis	P
GO:0035108	74	0.955	1	0.868	1	limb morphogenesis	P
GO:0035113	68	0.957	1	0.838	1	embryonic appendage morphogenesis	P
GO:0035115	15	1	1	0.974	1	embryonic forelimb morphogenesis	P
GO:0035116	14	0.2	1	0.17	1	embryonic hindlimb morphogenesis	P
GO:0035136	17	1	1	0.929	1	forelimb morphogenesis	P
GO:0035137	18	0.273	1	0.322	1	hindlimb morphogenesis	P
GO:0035176	11	0.729	1	0.431	1	social behavior	P
GO:0035239	95	0.309	1	0.281	1	tube morphogenesis	P
GO:0035240	53	0.274	1	0.398	1	dopamine binding	F
GO:0035249	26	0.994	1	0.917	1	synaptic transmission, glutamatergic	P
GO:0035250	18	0.314	1	0.795	1	UDP-galactosyltransferase activity	F
GO:0035257	43	0.0313	1	0.00873	0.447	nuclear hormone receptor binding	F
GO:0035264	68	0.152	1	0.225	1	body growth	P
GO:0035265	22	0.462	1	0.62	1	organ growth	P
GO:0035270	49	0.844	1	0.999	1	endocrine system development	P
GO:0035272	17	0.442	1	0.0773	1	exocrine system development	P
GO:0035282	43	0.981	1	0.49	1	segmentation	P
GO:0035295	168	0.084	1	0.334	1	tube development	P
GO:0035315	17	0.546	1	0.322	1	hair cell differentiation	P
GO:0040007	269	0.00337	0.186	6.76e-05	0.01	growth	P
GO:0040008	168	0.105	1	0.00227	0.197	regulation of growth	P
GO:0040011	379	0.185	1	0.102	1	locomotion	P
GO:0040012	83	0.184	1	0.234	1	regulation of locomotion	P
GO:0040013	26	0.0296	1	0.0991	1	negative regulation of locomotion	P
GO:0040014	50	0.0972	1	0.308	1	regulation of body size	P
GO:0040017	35	0.149	1	0.214	1	positive regulation of locomotion	P
GO:0040018	22	0.784	1	0.583	1	positive regulation of body size	P
GO:0040029	50	0.671	1	0.23	1	regulation of gene expression, epigenetic	P
GO:0042035	49	0.22	1	0.204	1	regulation of cytokine biosynthesis	P
GO:0042036	12	0.163	1	0.0734	1	negative regulation of cytokine biosynthesis	P
GO:0042054	17	0.0035	0.186	0.0341	1	histone methyltransferase activity	F
GO:0042060	166	0.671	1	0.718	1	wound healing	P
GO:0042063	51	0.409	1	0.738	1	gliogenesis	P
GO:0042089	59	0.121	1	0.23	1	cytokine biosynthesis	P
GO:0042093	11	0.182	1	0.0731	1	T-helper cell differentiation	P
GO:0042094	13	0.595	1	0.373	1	interleukin-2 biosynthesis	P
GO:0042098	53	0.074	1	0.0418	1	T cell proliferation	P
GO:0042100	26	0.773	1	0.25	1	B cell proliferation	P
GO:0042102	28	0.169	1	0.0593	1	positive regulation of T cell proliferation	P
GO:0042107	60	0.105	1	0.272	1	cytokine metabolism	P
GO:0042108	33	0.157	1	0.27	1	positive regulation of cytokine biosynthesis	P
GO:0042110	116	0.00542	0.286	4.34e-05	0.008	T cell activation	P
GO:0042113	76	0.189	1	0.0732	1	B cell activation	P
GO:0042116	24	0.0621	1	0.499	1	macrophage activation	P
GO:0042127	439	0.00129	0.096	0.00137	0.0938	regulation of cell proliferation	P
GO:0042129	40	0.188	1	0.0437	1	regulation of T cell proliferation	P
GO:0042130	14	0.538	1	0.227	1	negative regulation of T cell proliferation	P
GO:0042133	44	0.465	1	0.491	1	neurotransmitter metabolism	P
GO:0042136	17	0.996	1	0.872	1	neurotransmitter biosynthesis	P
GO:0042157	52	0.0416	1	0.0893	1	lipoprotein metabolism	P
GO:0042158	35	0.0396	1	0.204	1	lipoprotein biosynthesis	P
GO:0042165	199	0.709	1	0.983	1	neurotransmitter binding	F
GO:0042166	24	0.508	1	0.973	1	acetylcholine binding	F
GO:0042168	13	0.0221	1	0.09	1	heme metabolism	P
GO:0042169	11	0.238	1	0.0125	0.604	SH2 domain binding	F
GO:0042175	272	0.000103	0.025	2.02e-05	0.007	nuclear envelope-endoplasmic reticulum network	C
GO:0042176	19	0.552	1	0.131	1	regulation of protein catabolism	P
GO:0042219	16	0.286	1	0.0715	1	amino acid derivative catabolism	P
GO:0042221	637	0.0131	0.89	6.94e-05	0.01	response to chemical stimulus	P
[truncated: 749 more rows]
